# Supplementary material for: The open-cubane oxo–oxyl coupling mechanism dominates photosynthetic oxygen evolution: a comprehensive DFT investigation on O–O bond formation in the S4state
Source: Royal Society of Chemistry journal article supplement (doi:10.1039/c7cp01617d), 2017-01-01
Supplement: c7cp01617d1.pdf [file c7cp01617d1.pdf]

# **The open-cubane oxo-oxyl coupling mechanism dominates photosynthetic oxygen evolution: A comprehensive DFT investigation on O-O bond formation in the S<sub>4</sub> state**

Yu Guo, Hui Li, Lan-Lan He, Dong-Xia Zhao\*, Li-Dong Gong, and Zhong-Zhi Yang\*

School of Chemistry and Chemical Engineering, Liaoning Normal University, Dalian 116029, People's Republic of China

\*Corresponding author: Tel: (86) 411-82159607 Fax: (86) 411-82158977

E-mail: [zzyang@lnnu.edu.cn](mailto:zzyang@lnnu.edu.cn); [zhaodxchem@lnnu.edu.cn](mailto:zhaodxchem@lnnu.edu.cn)

## **Electronic Supplementary Information**

**Contents:** Presentations of additional remarks, diagrammatic sketches, computed absolute and relative Gibbs free energies of stationary points, calculated barrier heights, driving forces and Mulliken spin populations on relevant atomic sites for all the determined pathways in all spin states, with typical structures shown in optimized Cartesian coordinates, and animations for representative reaction scenarios uploaded as 'video\_open/closed-cubane.zip'.

|                                           |     |
|-------------------------------------------|-----|
| Abbreviated drawings.....                 | 3   |
| Wx (oxyl/hydroxyl)-O5 (oxo) .....         | 4   |
| W3 (water)-W2 (oxyl) .....                | 33  |
| W3 (water)-Wx (oxo/oxyl) .....            | 47  |
| W1 (hydroxyl)-W2 (hydroxyl/oxyl) .....    | 68  |
| O2 (oxo)-O4 (oxo/oxyl) .....              | 96  |
| W1 (hydroxyl)-O4 (oxo) .....              | 139 |
| W2 (hydroxyl/oxyl)-O5 (oxo) .....         | 154 |
| W2 (hydroxyl/oxo)-Wx (oxo/hydroxyl) ..... | 175 |
| W3 (water)-O5 (oxo) .....                 | 189 |
| W3 (hydroxyl) as the reagent.....         | 197 |
| W3 (water) deprotonation.....             | 243 |
| Data Summary.....                         | 253 |

## Abbreviated drawings

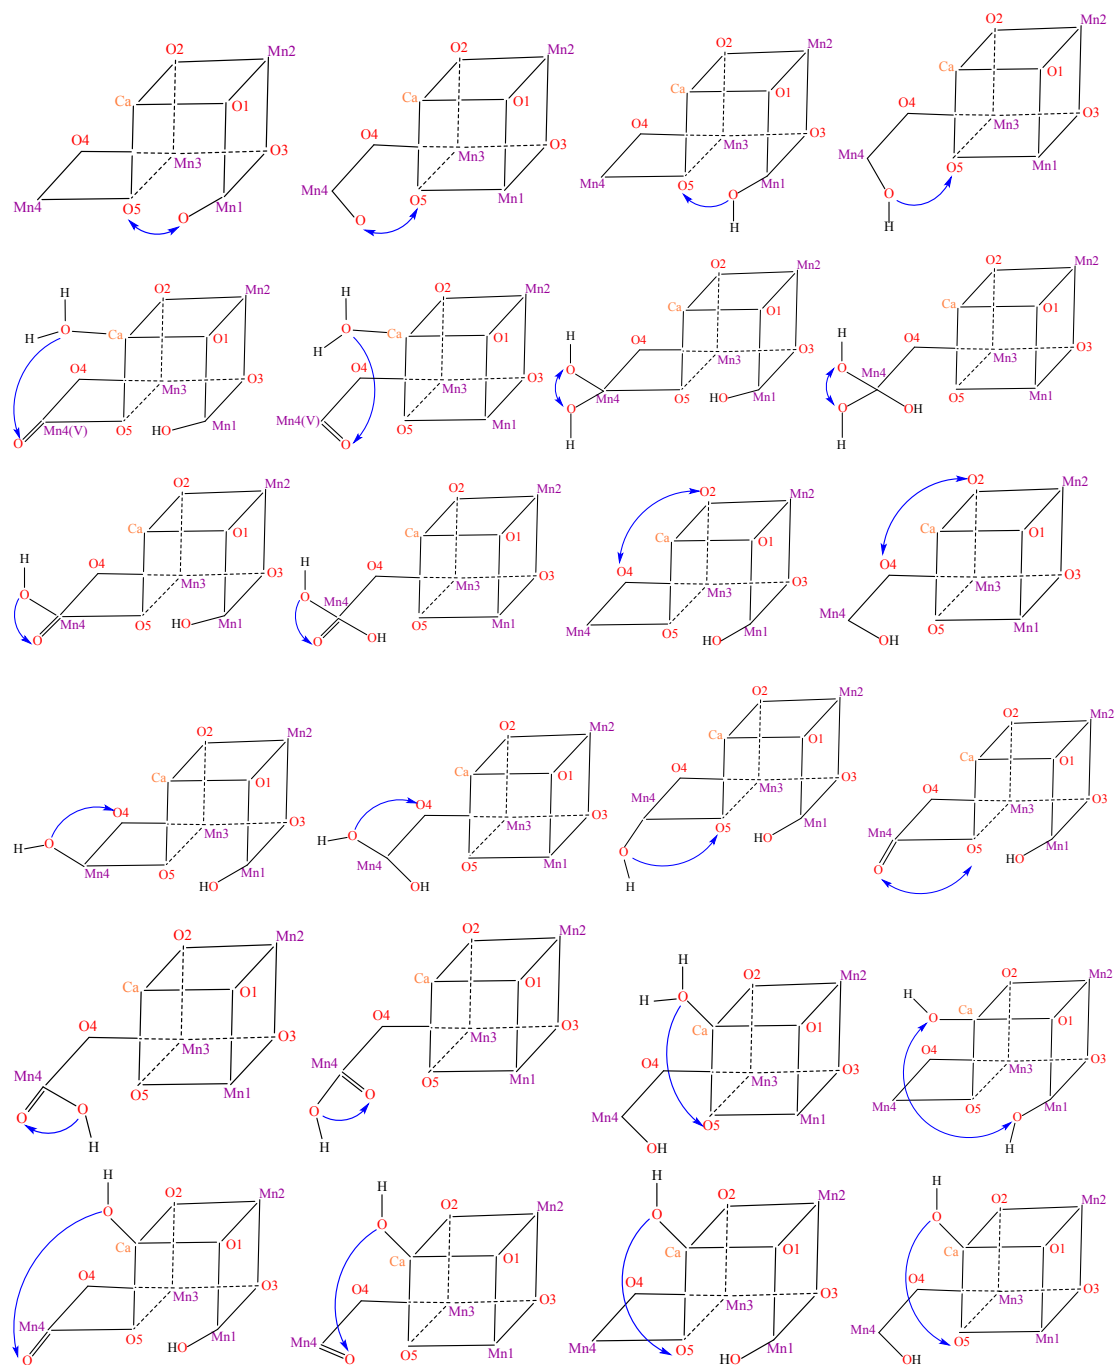

**Fig. S1** Abbreviated drawings of O-O bond formation reactions exemplified in partial proton states explored in this paper.

## Wx (oxyl/hydroxyl)-O5 (oxo)

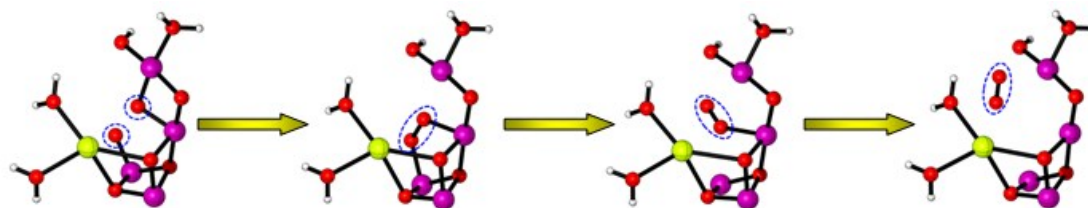

**Fig. S2** Pictorial exhibitions for the open-cubane Wx (oxyl)-O5 (oxo) coupling and O<sub>2</sub> release. All the protein residues are not shown for clarity. The blue dotted circle stands for the two coupling oxygen atoms, the same below.

**Table S1** Reaction parameters for the open-cubane Wx (oxyl)-O5 (oxo) coupling:

| Spin state | Spin topology (Mn1~Mn4-O10) | Gibbs Free energy (a.u.) |            |                                  |                                  |                    |
|------------|-----------------------------|--------------------------|------------|----------------------------------|----------------------------------|--------------------|
|            |                             | Rea                      | TS-OO      | Pro-O <sub>2</sub> <sup>2-</sup> | Int-O <sub>2</sub> <sup>·-</sup> | Pro-O <sub>2</sub> |
| doublet    | ααββ                        | -3366.2127               | -3366.1920 | -3366.2050                       | -3366.2307                       | -3366.2360         |
|            | αβαβ                        | -3366.2133               | -3366.1932 | -3366.2061                       | -3366.2304                       | -3366.2237         |
|            | αββα                        | -3366.2144               | -3366.2076 | -3366.2481                       | -3366.2259                       | -3366.2232         |
|            | βααβ                        | -3366.2261               | -3366.2021 | -3366.2058                       | -3366.1811                       | -3366.2391         |
|            | βαβα                        | -3366.2247               | -3366.2153 | -3366.2486                       | -3366.2307                       | -3366.2422         |
|            | ββαα                        | -3366.2240               | -3366.2164 | -3366.2481                       | -3366.2245                       | -3366.2188         |
| sextet     | αααββ                       | -3366.2265               | -3366.2180 | -3366.2503                       | -3366.2301                       | -3366.2363         |
|            | ααβαβ                       | -3366.2279               | -3366.2025 | -3366.2069                       | -3366.1925                       | -3366.2398         |
|            | αβααβ                       | -3366.2247               | -3366.2034 | -3366.2069                       | -3366.1856                       | -3366.1968         |
|            | βαααβ                       | -3366.2126               | -3366.1942 | -3366.2059                       | -3366.2333                       | -3366.2382         |
| octet      | αααβα                       | -3366.2122               | -3366.1941 | -3366.2075                       | -3366.1852                       | -3366.2227         |
|            | ααβαα                       | -3366.2132               | -3366.2071 | -3366.2493                       | -3366.2260                       | -3366.2223         |
|            | αβααα                       | -3366.2120               | -3366.2057 | -3366.2500                       | -3366.2300                       | -3366.2392         |
|            | βαααα                       | -3366.2249               | -3366.2167 | -3366.2493                       | -3366.2266                       | -3366.2202         |
| 12-et      | ααααβ                       | -3366.2259               | -3366.2022 | -3366.2076                       | -3366.1844                       | -3366.1927         |
| 14-et      | ααααα                       | -3366.2125               | -3366.2084 | -3366.2514                       | -3366.2265                       | -3366.2368         |

| Spin state | Spin topology (Mn1~Mn4-O10) | Relative Gibbs Free energy (kcal/mol) |                                           |         |                                       |                         |
|------------|-----------------------------|---------------------------------------|-------------------------------------------|---------|---------------------------------------|-------------------------|
|            |                             | ΔG <sup>‡</sup> (Rea-TS)              | ΔG(Rea-Pro-O <sub>2</sub> <sup>2-</sup> ) | ΔG(Rea) | ΔG(Pro-O <sub>2</sub> <sup>2-</sup> ) | ΔG(Pro-O <sub>2</sub> ) |
| doublet    | ααββ                        | 13.0                                  | 4.8                                       | 9.5     | 29.1                                  | 3.9                     |
|            | αβαβ                        | 12.6                                  | 4.5                                       | 9.2     | 28.4                                  | 11.6                    |
|            | αββα                        | 4.3                                   | -21.1                                     | 8.5     | 2.1                                   | 11.9                    |
|            | βααβ                        | 15.1                                  | 12.7                                      | 1.1     | 28.6                                  | 1.9                     |
|            | βαβα                        | 5.9                                   | -15.0                                     | 2.0     | 1.8                                   | 0.0                     |
|            | ββαα                        | 4.8                                   | -15.1                                     | 2.4     | 2.1                                   | 14.7                    |
| sextet     | αααββ                       | 5.3                                   | -14.9                                     | 0.9     | 0.7                                   | 3.7                     |

|       |                                  |      |       |      |      |      |
|-------|----------------------------------|------|-------|------|------|------|
|       | $\alpha\alpha\beta\alpha\beta$   | 15.9 | 13.2  | 0.0  | 27.9 | 1.5  |
|       | $\alpha\beta\alpha\alpha\beta$   | 13.4 | 11.2  | 2.0  | 27.9 | 28.5 |
|       | $\beta\alpha\alpha\alpha\beta$   | 11.5 | 4.2   | 9.6  | 28.6 | 2.5  |
| octet | $\alpha\alpha\alpha\beta\alpha$  | 11.4 | 2.9   | 9.9  | 27.5 | 12.2 |
|       | $\alpha\alpha\beta\alpha\alpha$  | 3.8  | -22.7 | 9.2  | 1.3  | 12.5 |
|       | $\alpha\beta\alpha\alpha\alpha$  | 4.0  | -23.8 | 10.0 | 0.9  | 1.9  |
|       | $\beta\alpha\alpha\alpha\alpha$  | 5.1  | -15.3 | 1.9  | 1.3  | 13.8 |
| 12-et | $\alpha\alpha\alpha\alpha\beta$  | 14.9 | 11.5  | 1.3  | 27.5 | 31.1 |
| 14-et | $\alpha\alpha\alpha\alpha\alpha$ | 2.6  | -24.4 | 9.7  | 0.0  | 3.4  |

| Spin state | Spin topology<br>(Mn1~Mn4-O10) |       | Mulliken spin density |       |                                  |                                  |                    |
|------------|--------------------------------|-------|-----------------------|-------|----------------------------------|----------------------------------|--------------------|
|            |                                |       | Rea                   | TS-OO | Pro-O <sub>2</sub> <sup>2-</sup> | Int-O <sub>2</sub> <sup>·-</sup> | Pro-O <sub>2</sub> |
| doublet    | $\alpha$                       | Mn1   | 2.81                  | 2.95  | 2.94                             | 3.88                             | 3.84               |
|            | $\alpha$                       | Mn2   | 2.93                  | 2.93  | 2.93                             | 2.97                             | 2.94               |
|            | $\beta$                        | Mn3   | -2.88                 | -2.80 | -2.83                            | -2.93                            | -3.81              |
|            | $\beta$                        | Mn4   | -2.87                 | -2.42 | -1.95                            | -3.86                            | -3.90              |
|            |                                | O4    | -0.12                 | -0.16 | -0.19                            | -0.13                            | -0.11              |
|            | $\alpha$                       | O5    | -0.03                 | 0.09  | 0.07                             | 0.62                             | 1.00               |
|            |                                | O10   | 0.89                  | 0.37  | -0.01                            | 0.42                             | 1.00               |
|            | $\alpha$                       | Mn1   | 2.81                  | 2.92  | 2.93                             | 3.88                             | 3.85               |
|            | $\beta$                        | Mn2   | -2.91                 | -2.90 | -2.92                            | -2.91                            | -2.89              |
|            | $\alpha$                       | Mn3   | 2.86                  | 2.85  | 2.84                             | 2.80                             | 3.78               |
|            | $\beta$                        | Mn4   | -2.83                 | -2.44 | -1.94                            | -3.83                            | -3.83              |
|            |                                | O4    | 0.03                  | 0.06  | 0.13                             | 0.12                             | -0.02              |
|            | $\alpha$                       | O5    | -0.05                 | 0.02  | -0.03                            | 0.55                             | 0.01               |
|            |                                | O10   | 0.90                  | 0.43  | -0.04                            | 0.32                             | 0.00               |
|            | $\alpha$                       | Mn1   | 2.80                  | 2.89  | 2.96                             | 3.86                             | 3.85               |
|            | $\beta$                        | Mn2   | -2.93                 | -2.93 | -2.93                            | -2.92                            | -2.95              |
|            | $\beta$                        | Mn3   | -2.89                 | -2.85 | -2.83                            | -2.81                            | -3.80              |
|            | $\alpha$                       | Mn4   | 2.86                  | 3.33  | 3.87                             | 3.82                             | 3.83               |
|            |                                | O4    | -0.02                 | -0.09 | -0.13                            | 0.09                             | 0.03               |
|            | $\alpha$                       | O5    | 0.10                  | 0.01  | 0.05                             | -0.57                            | 0.01               |
|            |                                | O10   | 0.89                  | 0.57  | -0.02                            | -0.31                            | 0.00               |
|            | $\beta$                        | Mn1   | -2.79                 | -2.74 | -2.92                            | -3.86                            | -3.85              |
|            | $\alpha$                       | Mn2   | 2.93                  | 2.93  | 2.93                             | 2.91                             | 2.95               |
|            | $\alpha$                       | Mn3   | 2.90                  | 2.95  | 2.84                             | 2.84                             | 3.80               |
|            | $\beta$                        | Mn4   | -2.84                 | -2.36 | -1.95                            | -1.88                            | -3.83              |
|            |                                | O4    | 0.01                  | 0.03  | 0.11                             | 0.04                             | 0.03               |
|            | $\alpha$                       | O5    | -0.04                 | -0.04 | -0.05                            | 0.57                             | 1.00               |
|            |                                | O10   | 0.69                  | 0.16  | 0.02                             | 0.29                             | 1.00               |
| $\beta$    | Mn1                            | -2.80 | -2.82                 | -2.96 | -3.87                            | -3.85                            |                    |
| $\alpha$   | Mn2                            | 2.91  | 2.91                  | 2.92  | 2.92                             | 2.89                             |                    |
| $\beta$    | Mn3                            | -2.87 | -2.81                 | -2.85 | -2.93                            | -3.77                            |                    |
| $\alpha$   | Mn4                            | 2.86  | 3.40                  | 3.87  | 3.82                             | 3.83                             |                    |

|        |          |     |       |       |       |       |       |
|--------|----------|-----|-------|-------|-------|-------|-------|
|        |          | O4  | -0.02 | -0.11 | -0.14 | -0.08 | 0.02  |
|        | $\alpha$ | O5  | 0.13  | 0.00  | 0.07  | 0.67  | 1.00  |
|        |          | O10 | 0.69  | 0.39  | 0.06  | 0.47  | 0.99  |
|        | $\beta$  | Mn1 | -2.80 | -2.83 | -2.94 | -3.87 | -3.84 |
|        | $\beta$  | Mn2 | -2.94 | -2.94 | -2.94 | -2.97 | -2.94 |
|        | $\alpha$ | Mn3 | 2.87  | 2.88  | 2.85  | 2.87  | 3.81  |
|        | $\alpha$ | Mn4 | 2.90  | 3.40  | 3.90  | 3.89  | 3.90  |
|        |          | O4  | 0.13  | 0.13  | 0.15  | 0.17  | 0.11  |
|        | $\alpha$ | O5  | 0.09  | -0.06 | -0.02 | 0.58  | -0.01 |
|        |          | O10 | 0.69  | 0.41  | 0.02  | 0.32  | 0.01  |
|        | $\alpha$ | Mn1 | 2.82  | 2.84  | 2.97  | 3.87  | 3.85  |
|        | $\alpha$ | Mn2 | 2.95  | 2.95  | 2.94  | 2.97  | 3.00  |
|        | $\alpha$ | Mn3 | 2.91  | 2.86  | 2.89  | 2.98  | 3.80  |
|        | $\beta$  | Mn4 | -2.86 | -3.40 | -3.87 | -3.82 | -3.83 |
|        |          | O4  | 0.01  | 0.10  | 0.12  | 0.07  | -0.03 |
|        | $\beta$  | O5  | -0.13 | 0.00  | -0.06 | -0.66 | -1.00 |
|        |          | O10 | -0.67 | -0.38 | -0.05 | -0.47 | -1.00 |
|        | $\alpha$ | Mn1 | 2.81  | 2.74  | 2.94  | 2.03  | 3.85  |
|        | $\alpha$ | Mn2 | 2.94  | 2.93  | 2.93  | 2.91  | 2.94  |
|        | $\beta$  | Mn3 | -2.87 | -2.93 | -2.81 | -2.76 | -3.77 |
|        | $\alpha$ | Mn4 | 2.84  | 2.37  | 1.95  | 3.82  | 3.83  |
|        |          | O4  | -0.01 | -0.03 | -0.12 | -0.10 | 0.03  |
|        | $\beta$  | O5  | 0.06  | 0.04  | 0.06  | -0.64 | -1.00 |
|        |          | O10 | -0.66 | -0.14 | -0.01 | -0.32 | -1.00 |
| sextet | $\alpha$ | Mn1 | 2.80  | 2.78  | 2.93  | 3.86  | 3.89  |
|        | $\beta$  | Mn2 | -2.91 | -2.91 | -2.91 | -2.91 | -2.89 |
|        | $\alpha$ | Mn3 | 2.88  | 2.81  | 2.85  | 3.16  | 3.87  |
|        | $\alpha$ | Mn4 | 2.87  | 2.35  | 1.96  | 1.95  | 1.92  |
|        |          | O4  | 0.14  | 0.19  | 0.21  | 0.13  | 0.13  |
|        | $\beta$  | O5  | -0.01 | -0.04 | -0.04 | -0.69 | -1.01 |
|        |          | O10 | -0.68 | -0.19 | -0.04 | -0.50 | -0.99 |
|        | $\beta$  | Mn1 | -2.80 | -2.93 | -2.92 | -3.88 | -3.84 |
|        | $\alpha$ | Mn2 | 2.93  | 2.92  | 2.93  | 2.92  | 2.95  |
|        | $\alpha$ | Mn3 | 2.91  | 2.84  | 2.86  | 2.96  | 3.84  |
|        | $\alpha$ | Mn4 | 2.87  | 2.42  | 1.95  | 3.85  | 3.90  |
|        |          | O4  | 0.12  | 0.16  | 0.18  | 0.12  | 0.11  |
|        | $\beta$  | O5  | 0.02  | -0.09 | -0.06 | -0.61 | -1.00 |
|        |          | O10 | -0.89 | -0.36 | 0.01  | -0.41 | -1.00 |
|        | $\alpha$ | Mn1 | 2.82  | 2.95  | 2.96  | 3.86  | 3.85  |
|        | $\alpha$ | Mn2 | 2.94  | 2.95  | 2.94  | 2.97  | 3.00  |
|        | $\alpha$ | Mn3 | 2.90  | 2.88  | 2.88  | 3.06  | 3.81  |
| octet  | $\beta$  | Mn4 | -2.82 | -2.37 | -1.93 | -1.87 | -3.83 |
|        |          | O4  | 0.02  | 0.08  | 0.12  | 0.01  | -0.03 |
|        | $\alpha$ | O5  | -0.05 | 0.02  | -0.03 | -0.67 | 0.00  |

|       |          |     |       |       |       |       |       |
|-------|----------|-----|-------|-------|-------|-------|-------|
|       |          | O10 | 0.90  | 0.39  | -0.03 | -0.48 | -0.01 |
|       | $\alpha$ | Mn1 | 2.81  | 2.90  | 2.98  | 3.86  | 3.85  |
|       | $\alpha$ | Mn2 | 2.93  | 2.93  | 2.94  | 2.97  | 2.94  |
|       | $\beta$  | Mn3 | -2.86 | -2.81 | -2.80 | -2.77 | -3.77 |
|       | $\alpha$ | Mn4 | 2.86  | 3.33  | 3.87  | 3.82  | 3.83  |
|       |          | O4  | -0.02 | -0.10 | -0.14 | -0.10 | 0.03  |
|       | $\alpha$ | O5  | 0.11  | 0.02  | 0.06  | -0.56 | 0.00  |
|       |          | O10 | 0.89  | 0.58  | -0.01 | -0.31 | 0.00  |
|       | $\alpha$ | Mn1 | 2.81  | 2.89  | 2.98  | 3.89  | 3.85  |
|       | $\beta$  | Mn2 | -2.91 | -2.91 | -2.92 | -2.88 | -2.89 |
|       | $\alpha$ | Mn3 | 2.88  | 2.88  | 2.89  | 2.80  | 3.83  |
|       | $\alpha$ | Mn4 | 2.91  | 3.37  | 3.91  | 3.87  | 3.90  |
|       |          | O4  | 0.13  | 0.14  | 0.16  | 0.12  | 0.12  |
|       | $\alpha$ | O5  | 0.08  | -0.05 | -0.03 | 0.60  | -1.00 |
|       |          | O10 | 0.90  | 0.61  | -0.05 | 0.31  | -1.00 |
|       | $\beta$  | Mn1 | -2.78 | -2.82 | -2.93 | -3.87 | -3.84 |
|       | $\alpha$ | Mn2 | 2.93  | 2.93  | 2.93  | 2.92  | 2.95  |
|       | $\alpha$ | Mn3 | 2.90  | 2.91  | 2.88  | 2.92  | 3.84  |
|       | $\alpha$ | Mn4 | 2.90  | 3.40  | 3.90  | 3.89  | 3.90  |
|       |          | O4  | 0.13  | 0.13  | 0.14  | 0.15  | 0.11  |
|       | $\alpha$ | O5  | 0.10  | -0.05 | -0.01 | 0.59  | 0.00  |
|       |          | O10 | 0.70  | 0.42  | 0.02  | 0.32  | 0.01  |
|       | $\alpha$ | Mn1 | 2.82  | 2.79  | 2.95  | 3.86  | 3.90  |
|       | $\alpha$ | Mn2 | 2.95  | 2.94  | 2.94  | 2.98  | 3.00  |
|       | $\alpha$ | Mn3 | 2.92  | 2.85  | 2.89  | 3.18  | 3.89  |
| 12-et | $\alpha$ | Mn4 | 2.87  | 2.37  | 1.96  | 1.93  | 1.92  |
|       |          | O4  | 0.13  | 0.18  | 0.20  | 0.11  | 0.13  |
|       | $\beta$  | O5  | -0.01 | -0.05 | -0.04 | -0.68 | -1.00 |
|       |          | O10 | -0.67 | -0.18 | -0.04 | -0.49 | -1.00 |
|       | $\alpha$ | Mn1 | 2.83  | 2.90  | 3.00  | 3.85  | 3.85  |
|       | $\alpha$ | Mn2 | 2.95  | 2.95  | 2.95  | 2.90  | 3.00  |
|       | $\alpha$ | Mn3 | 2.92  | 2.92  | 2.93  | 2.94  | 3.86  |
| 14-et | $\alpha$ | Mn4 | 2.91  | 3.37  | 3.90  | 3.88  | 3.90  |
|       |          | O4  | 0.12  | 0.13  | 0.14  | 0.13  | 0.11  |
|       | $\alpha$ | O5  | 0.08  | -0.06 | -0.02 | 0.65  | -0.99 |
|       |          | O10 | 0.90  | 0.61  | -0.04 | 0.40  | -1.00 |

**Optimized Cartesian coordinates of reactant (Rea), transition state (TS) and product (Pro) structures exemplified by a certain spin state for structural similarities, the same below:**

**Rea:**

|    |             |             |             |    |             |             |            |
|----|-------------|-------------|-------------|----|-------------|-------------|------------|
| Ca | -2.70854800 | 0.54568200  | -0.74851800 | Mn | -1.37097500 | -0.93388900 | 2.05105100 |
| Mn | -0.26397600 | -1.73469500 | -0.27778000 | Mn | 0.23898700  | 0.87190500  | 0.74821100 |

|    |             |             |             |   |             |             |             |
|----|-------------|-------------|-------------|---|-------------|-------------|-------------|
| Mn | 0.50616600  | 3.46700900  | -1.21267400 | N | 3.60672000  | -2.93356500 | -1.40507800 |
| O  | -1.90885400 | -1.58594100 | 0.44914000  | H | 4.51414300  | -3.31291500 | -1.12844200 |
| O  | 0.37143800  | -0.98678800 | 1.29609100  | C | 2.48227000  | -2.99462000 | -0.65570600 |
| O  | -1.45458700 | 0.74089100  | 1.39794500  | H | 2.31827600  | -3.68255000 | 0.16073200  |
| O  | -0.23450500 | 0.00139600  | -0.83176400 | C | 4.50572700  | -1.53498400 | -3.34759200 |
| O  | -0.00673800 | 2.52497900  | 0.20164900  | H | 4.29620400  | -2.03337100 | -4.30637600 |
| O  | -5.06809300 | 0.08352700  | -1.50363300 | H | 4.41414300  | -0.45852500 | -3.54553900 |
| H  | -5.36440000 | -0.19482900 | -0.61344400 | C | 5.97274300  | -1.87421400 | -2.96122100 |
| H  | -4.83277900 | -0.73568600 | -1.98311300 | H | 6.15259100  | -2.95094100 | -3.05641600 |
| O  | -2.16748400 | 1.17302300  | -3.10021100 | H | 6.64583800  | -1.36810800 | -3.66668900 |
| H  | -1.91196800 | 0.34983000  | -3.54886400 | C | 6.28861700  | -1.50133200 | -1.51549300 |
| H  | -1.33434900 | 1.70582300  | -3.03142900 | O | 6.21650000  | -2.33980200 | -0.60948400 |
| O  | 1.11330500  | 4.39783000  | -2.70891800 | N | 6.56852300  | -0.18980600 | -1.28111000 |
| H  | 2.03201100  | 4.09076000  | -2.84403600 | H | 6.56152600  | 0.44161200  | -2.07299000 |
| O  | 0.90920400  | 5.03345300  | 0.25719900  | C | 6.47372200  | 0.39385900  | 0.06071400  |
| H  | 0.10013700  | 5.54608300  | 0.05381400  | H | 6.89706800  | -0.33494500 | 0.75837900  |
| H  | 0.66033100  | 4.46327900  | 1.01523800  | H | 7.10602100  | 1.29092000  | 0.08111500  |
| O  | -2.73227300 | 2.93093400  | -0.87695800 | C | 5.02114700  | 0.71913400  | 0.45712500  |
| C  | -2.36534800 | 4.08165700  | -1.14303200 | H | 4.43345200  | -0.20560500 | 0.44228600  |
| O  | -1.13326400 | 4.47327600  | -1.32533600 | H | 5.01049100  | 1.07830200  | 1.49579900  |
| C  | -3.37941300 | 5.21316400  | -1.30628800 | C | 4.37045900  | 1.75724800  | -0.46096300 |
| H  | -3.06519400 | 6.04304900  | -0.65651200 | H | 4.54886900  | 1.50017400  | -1.51728200 |
| H  | -3.26993600 | 5.58958900  | -2.33392800 | H | 4.80366800  | 2.75652700  | -0.31846000 |
| C  | -4.82249600 | 4.79868700  | -1.02189500 | C | 2.85076200  | 1.89331200  | -0.34519400 |
| H  | -4.93756700 | 4.44591200  | 0.01020900  | O | 2.21695900  | 0.99179600  | 0.26393200  |
| H  | -5.13478200 | 3.98409300  | -1.68527800 | O | 2.38480600  | 2.92608300  | -0.93739600 |
| H  | -5.50077300 | 5.64827200  | -1.17256700 | O | -0.08901800 | -3.53350200 | 0.69087700  |
| O  | -0.96004800 | -2.59062300 | -1.87100200 | C | -0.51615800 | -3.71137300 | 1.88268900  |
| C  | -2.13665800 | -2.47220400 | -2.39735400 | O | -1.04158400 | -2.83911100 | 2.64083600  |
| O  | -2.89794200 | -1.49430100 | -2.24030100 | C | -0.39233400 | -5.13154000 | 2.42623000  |
| C  | -2.53927100 | -3.64614700 | -3.28512800 | H | 0.59766600  | -5.50865500 | 2.13517200  |
| H  | -1.72947200 | -3.79963200 | -4.01451000 | H | -1.11679700 | -5.73998100 | 1.86271300  |
| H  | -2.52884300 | -4.54566900 | -2.65032400 | H | -6.32362200 | -0.30411700 | 2.63608600  |
| C  | -3.88863000 | -3.49152900 | -3.99087200 | C | -0.62509800 | -5.26809700 | 3.93114300  |
| H  | -3.88499000 | -2.56615700 | -4.58375700 | H | -0.53253700 | -6.31827500 | 4.23628900  |
| H  | -4.67856000 | -3.36565200 | -3.23687500 | H | 0.10490300  | -4.67945100 | 4.49990600  |
| C  | -4.21822700 | -4.68788000 | -4.89061500 | H | -1.62271300 | -4.91120700 | 4.20889000  |
| H  | -3.46066900 | -4.81735400 | -5.67636000 | O | -4.30845300 | -0.03829600 | 1.11057000  |
| H  | -5.19027800 | -4.55768500 | -5.38349500 | C | -4.20759000 | -0.52206000 | 2.25639000  |
| H  | -4.25891600 | -5.62263900 | -4.31392400 | O | -3.10599200 | -0.91158000 | 2.81995400  |
| N  | 1.61200300  | -2.08621400 | -1.06843000 | C | -5.43597200 | -0.70936100 | 3.12938000  |
| C  | 2.20289500  | -1.39348200 | -2.10446100 | H | -5.28293500 | -0.21152300 | 4.09434500  |
| H  | 1.68339300  | -0.57382800 | -2.58327500 | H | -5.57914100 | -1.77785500 | 3.33530900  |
| C  | 3.45985500  | -1.90291600 | -2.32890000 | O | -0.50653300 | -0.19667600 | 3.69330800  |



|   |            |            |            |   |            |            |             |
|---|------------|------------|------------|---|------------|------------|-------------|
| C | 0.35035700 | 0.74578700 | 3.66275200 | H | 2.84882500 | 0.36065100 | 4.85464200  |
| O | 0.80735500 | 1.32980800 | 2.62600200 | C | 2.90498100 | 1.86543200 | 6.41287900  |
| C | 0.87524500 | 1.23393800 | 5.00586200 | H | 2.50246600 | 2.86521000 | 6.62869500  |
| H | 0.42777100 | 2.22450900 | 5.18591000 | H | 4.00043300 | 1.93556700 | 6.43163800  |
| H | 0.50046900 | 0.55901700 | 5.78406000 | H | 2.59912300 | 1.20097500 | 7.23285700  |
| C | 2.40745800 | 1.34769300 | 5.05932500 | O | 0.23460600 | 2.28850200 | -2.45732000 |
| H | 2.74187600 | 2.01213600 | 4.25217500 |   |            |            |             |

**TS:**

|    |             |             |             |   |             |             |             |
|----|-------------|-------------|-------------|---|-------------|-------------|-------------|
| Ca | 2.78758700  | -0.65602900 | -0.60169500 | H | 2.53914000  | 4.22485900  | -3.00954300 |
| Mn | 0.26152700  | 1.62539800  | -0.44867400 | C | 3.95528100  | 3.10241600  | -4.23037200 |
| Mn | 1.36279400  | 1.04746800  | 1.97034000  | H | 3.98629300  | 2.13549900  | -4.75216800 |
| Mn | -0.24710500 | -0.93062300 | 0.95857200  | H | 4.72742500  | 3.05082900  | -3.44975700 |
| Mn | -0.54872100 | -3.27196700 | -1.07572900 | C | 4.28426600  | 4.23458400  | -5.20981900 |
| O  | 1.89859700  | 1.49500600  | 0.29957800  | H | 3.54499800  | 4.28803500  | -6.02135600 |
| O  | -0.35725000 | 0.99206000  | 1.19971900  | H | 5.27123400  | 4.08894700  | -5.66743300 |
| O  | 1.45661400  | -0.70835500 | 1.53517500  | H | 4.29129800  | 5.21060900  | -4.70457100 |
| O  | 0.23228600  | -0.36378300 | -0.79123400 | N | -1.60811600 | 1.85604700  | -1.29310900 |
| O  | -0.13168200 | -2.63174900 | 0.56234900  | C | -2.21708900 | 1.03586200  | -2.22186100 |
| O  | 5.13912900  | -0.22432800 | -1.39705800 | H | -1.71931000 | 0.14264900  | -2.57949300 |
| H  | 5.43265300  | 0.12912600  | -0.53306400 | C | -3.46120700 | 1.54077500  | -2.51986500 |
| H  | 4.89963100  | 0.55030900  | -1.94389000 | N | -3.57965300 | 2.69818900  | -1.75607200 |
| O  | 2.36235600  | -1.45268400 | -2.94487800 | H | -4.47543300 | 3.14179100  | -1.54429300 |
| H  | 2.36720700  | -0.61230200 | -3.43556000 | C | -2.45441600 | 2.83812000  | -1.01973100 |
| H  | 1.40879500  | -1.69929500 | -2.84402200 | H | -2.26889300 | 3.63313000  | -0.31185500 |
| O  | -1.04748100 | -3.96842800 | -2.68910700 | C | -4.52028700 | 1.05531700  | -3.47427600 |
| H  | -1.98327000 | -3.71962900 | -2.81535300 | H | -4.29659900 | 1.39545500  | -4.49683700 |
| O  | -1.06844600 | -5.05544600 | 0.06727700  | H | -4.46276000 | -0.04104400 | -3.50627800 |
| H  | -0.28155200 | -5.55915500 | -0.22684600 | C | -5.97624800 | 1.49432300  | -3.14919500 |
| H  | -0.80325300 | -4.64516200 | 0.91822000  | H | -6.12370900 | 2.54861000  | -3.40887400 |
| O  | 2.75671600  | -3.01297300 | -0.46867300 | H | -6.66498900 | 0.90632400  | -3.77109600 |
| C  | 2.31105800  | -4.07876700 | -0.91167200 | C | -6.30080700 | 1.35636500  | -1.66449000 |
| O  | 1.07665800  | -4.30914000 | -1.25920100 | O | -6.20377000 | 2.32137600  | -0.89733000 |
| C  | 3.22258800  | -5.28958400 | -1.10918900 | N | -6.61410600 | 0.10412100  | -1.23094300 |
| H  | 2.81723100  | -6.11336600 | -0.50193100 | H | -6.62379500 | -0.64085900 | -1.91710700 |
| H  | 3.10682300  | -5.61067000 | -2.15392400 | C | -6.50419300 | -0.27123600 | 0.18286100  |
| C  | 4.68823400  | -5.02405300 | -0.76819000 | H | -6.90864400 | 0.55947600  | 0.76878500  |
| H  | 4.80222000  | -4.72044300 | 0.27907600  | H | -7.14466900 | -1.14718400 | 0.34786000  |
| H  | 5.09607200  | -4.21966100 | -1.39141200 | C | -5.04680800 | -0.54885900 | 0.59888900  |
| H  | 5.28871100  | -5.92773600 | -0.93381000 | H | -4.45407600 | 0.35661400  | 0.42566100  |
| O  | 0.98693400  | 2.28854300  | -2.12918400 | H | -5.01335000 | -0.73623800 | 1.68067400  |
| C  | 2.18236900  | 2.17050000  | -2.60520300 | C | -4.42768700 | -1.72742800 | -0.15910700 |
| O  | 2.96655400  | 1.23089100  | -2.34246000 | H | -4.69759900 | -1.69574000 | -1.22465400 |
| C  | 2.58473000  | 3.27945400  | -3.57227200 | H | -4.80920100 | -2.69010800 | 0.21184500  |
| H  | 1.79113300  | 3.35791800  | -4.33064000 | C | -2.90127000 | -1.81099500 | -0.13427000 |

|   |             |             |             |   |             |             |             |
|---|-------------|-------------|-------------|---|-------------|-------------|-------------|
| O | -2.25695900 | -0.96536800 | 0.53495700  | H | 5.24959600  | 0.56068300  | 4.15475700  |
| O | -2.43138900 | -2.76712300 | -0.84435400 | H | 5.53022700  | 2.07036300  | 3.28352100  |
| O | 0.06809600  | 3.54672500  | 0.38924600  | O | 0.51137600  | 0.51914200  | 3.70199800  |
| C | 0.50159100  | 3.80804200  | 1.55787800  | C | -0.33249300 | -0.42558300 | 3.80017000  |
| O | 1.04297900  | 2.99030500  | 2.36959300  | O | -0.79422000 | -1.13551000 | 2.84413400  |
| C | 0.36981500  | 5.25804400  | 2.01765500  | C | -0.84418900 | -0.75671100 | 5.19357000  |
| H | -0.65034400 | 5.58391600  | 1.77063800  | H | -0.41720300 | -1.73368000 | 5.46993500  |
| H | 1.03268900  | 5.84912000  | 1.36711600  | H | -0.44277400 | -0.01144600 | 5.88987500  |
| H | 6.32293600  | 0.56382100  | 2.71828100  | C | -2.37815400 | -0.82719500 | 5.27796700  |
| C | 0.69290600  | 5.50402800  | 3.49146400  | H | -2.73889400 | -1.56499000 | 4.54978200  |
| H | 0.58214700  | 6.56916800  | 3.73241900  | H | -2.80017500 | 0.14333400  | 4.97651200  |
| H | 0.02301700  | 4.93194200  | 4.14452400  | C | -2.86558700 | -1.18792500 | 6.68504500  |
| H | 1.71860900  | 5.19917200  | 3.72625500  | H | -2.48235800 | -2.16898200 | 6.99921400  |
| O | 4.34874700  | 0.10890000  | 1.18541500  | H | -3.96189800 | -1.22915700 | 6.72552800  |
| C | 4.21179200  | 0.70179100  | 2.27648200  | H | -2.53190600 | -0.44859700 | 7.42629700  |
| O | 3.09251700  | 1.12894500  | 2.76671400  | O | -0.15599600 | -1.77781700 | -1.96142800 |
| C | 5.41524700  | 0.98628200  | 3.15770300  |   |             |             |             |

**Pro-O<sub>2</sub><sup>2-</sup>:**

|    |             |             |             |   |             |             |             |
|----|-------------|-------------|-------------|---|-------------|-------------|-------------|
| Ca | -2.84567900 | 0.62618900  | -0.54129300 | H | -3.24439900 | 5.76802100  | -1.70868500 |
| Mn | -0.28571800 | -1.85532400 | -0.53227800 | C | -4.80216500 | 4.95930400  | -0.40926100 |
| Mn | -1.25121200 | -1.04381700 | 1.89583600  | H | -4.90013100 | 4.51400900  | 0.58759900  |
| Mn | 0.29057100  | 1.02552200  | 0.92832500  | H | -5.19805400 | 4.23778700  | -1.13366700 |
| Mn | 0.47660000  | 3.40449800  | -0.98848500 | H | -5.42365000 | 5.86310600  | -0.44756400 |
| O  | -1.87987300 | -1.51774600 | 0.27085200  | O | -1.11316900 | -2.46224100 | -2.18562200 |
| O  | 0.38453600  | -0.92995300 | 1.00544700  | C | -2.30461100 | -2.23974400 | -2.63173900 |
| O  | -1.38941100 | 0.73209900  | 1.51142100  | O | -2.99099000 | -1.22664800 | -2.36281800 |
| O  | -0.30169800 | 0.76097600  | -0.87892800 | C | -2.83466100 | -3.31599700 | -3.57391400 |
| O  | 0.20073100  | 2.76425000  | 0.68926700  | H | -2.09844400 | -3.43011000 | -4.38445900 |
| O  | -5.18659500 | 0.13019900  | -1.29639500 | H | -2.80370800 | -4.26829300 | -3.02271500 |
| H  | -5.44706500 | -0.24305500 | -0.42971300 | C | -4.23226800 | -3.05701200 | -4.14147000 |
| H  | -4.93998200 | -0.62731000 | -1.86383900 | H | -4.24383100 | -2.08303800 | -4.65034800 |
| O  | -2.48749100 | 1.47350900  | -2.88638300 | H | -4.95058500 | -2.97589700 | -3.31279800 |
| H  | -2.45540400 | 0.62477900  | -3.36352600 | C | -4.68418800 | -4.15723600 | -5.10830800 |
| H  | -1.55657100 | 1.78674500  | -2.82499800 | H | -4.00235900 | -4.23881900 | -5.96645200 |
| O  | 0.85959600  | 4.15068100  | -2.59719000 | H | -5.68917200 | -3.95329500 | -5.49950900 |
| H  | 1.81198100  | 4.00657300  | -2.75322300 | H | -4.71112400 | -5.13806400 | -4.61327800 |
| O  | 1.02475600  | 5.17920900  | 0.11183700  | N | 1.56716900  | -2.02971500 | -1.42763200 |
| H  | 0.21062300  | 5.67009400  | -0.12556800 | C | 2.14453700  | -1.24679900 | -2.40701400 |
| H  | 0.82649000  | 4.75567000  | 0.97578400  | H | 1.60243800  | -0.42615000 | -2.85890100 |
| O  | -2.81689100 | 2.97812500  | -0.35659900 | C | 3.43158500  | -1.67643300 | -2.63174200 |
| C  | -2.40681500 | 4.09596300  | -0.69015800 | N | 3.61151300  | -2.75175300 | -1.76872300 |
| O  | -1.19063200 | 4.38776400  | -1.05382200 | H | 4.53148100  | -3.11663200 | -1.50943100 |
| C  | -3.34543100 | 5.30193100  | -0.71865500 | C | 2.47857100  | -2.91646500 | -1.05075900 |
| H  | -2.95367000 | 6.04107000  | -0.00285600 | H | 2.33198000  | -3.65731600 | -0.27728300 |

|   |             |             |             |   |             |             |             |
|---|-------------|-------------|-------------|---|-------------|-------------|-------------|
| C | 4.47762800  | -1.19072700 | -3.60115900 | H | -0.97276600 | -5.89347500 | 1.75889700  |
| H | 4.26724300  | -1.57787600 | -4.60962100 | H | -6.19338100 | -0.61955700 | 2.91573500  |
| H | 4.38550400  | -0.09860900 | -3.67654000 | C | -0.55630800 | -5.31624400 | 3.81730400  |
| C | 5.94561700  | -1.56775600 | -3.26013600 | H | -0.45630500 | -6.34922500 | 4.17522000  |
| H | 6.11836300  | -2.63359600 | -3.44721900 | H | 0.14520200  | -4.68811900 | 4.37963400  |
| H | 6.61203100  | -1.00736900 | -3.92994900 | H | -1.56756300 | -4.96393200 | 4.04819200  |
| C | 6.28485700  | -1.31600000 | -1.79350000 | O | -4.31778100 | -0.16035800 | 1.26860200  |
| O | 6.21355400  | -2.22403400 | -0.95618900 | C | -4.10576900 | -0.73616800 | 2.36090700  |
| N | 6.58619300  | -0.03286500 | -1.45640800 | O | -2.95579400 | -1.12091200 | 2.79819600  |
| H | 6.58246100  | 0.66225200  | -2.19297400 | C | -5.26148800 | -1.04546300 | 3.29775500  |
| C | 6.52312900  | 0.43629700  | -0.06798300 | H | -5.04637100 | -0.64418700 | 4.29516700  |
| H | 6.96517800  | -0.34556100 | 0.55686200  | H | -5.36564900 | -2.13322500 | 3.40194100  |
| H | 7.15337100  | 1.33139600  | 0.01088300  | O | -0.35036100 | -0.53797800 | 3.62887900  |
| C | 5.07928800  | 0.71982900  | 0.38743400  | C | 0.51249100  | 0.38153700  | 3.71972800  |
| H | 4.49484100  | -0.20354800 | 0.30498500  | O | 0.94361200  | 1.11367600  | 2.76128600  |
| H | 5.08895300  | 0.98524500  | 1.45355100  | C | 1.11295300  | 0.65888400  | 5.08851100  |
| C | 4.40754500  | 1.83166300  | -0.42298600 | H | 0.82266500  | 1.68165200  | 5.37352400  |
| H | 4.59006100  | 1.69243300  | -1.49966300 | H | 0.65947900  | -0.03349800 | 5.80690300  |
| H | 4.82163900  | 2.82000000  | -0.17833200 | C | 2.64762900  | 0.54184700  | 5.10175000  |
| C | 2.88833600  | 1.92898600  | -0.28616400 | H | 3.06065500  | 1.23037200  | 4.35299500  |
| O | 2.27432200  | 1.04231600  | 0.35655000  | H | 2.93377600  | -0.47321200 | 4.78772500  |
| O | 2.38128500  | 2.93350800  | -0.89823800 | C | 3.24055800  | 0.84194800  | 6.48224100  |
| O | 0.00922300  | -3.71599700 | 0.50338800  | H | 2.99376800  | 1.86240000  | 6.80745400  |
| C | -0.40393600 | -3.85533600 | 1.69425100  | H | 4.33451400  | 0.74991800  | 6.47157200  |
| O | -0.92926600 | -2.94612500 | 2.41699300  | H | 2.85474100  | 0.14881600  | 7.24252000  |
| C | -0.27908200 | -5.24438000 | 2.31556100  | O | 0.03700800  | 1.82220700  | -1.78939800 |
| H | 0.72678400  | -5.61559000 | 2.07416800  |   |             |             |             |

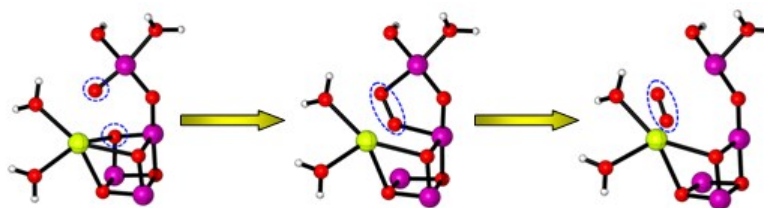

**Fig. S3** Pictorial exhibitions for the closed-cubane Wx (oxyl)-O5 (oxo) coupling.

**Table S2** Reaction parameters for the closed-cubane Wx (oxyl)-O5 (oxo) coupling:

| Spin state | Spin topology<br>(Mn1~Mn4-O10) | Gibbs Free energy (a.u.) |            |                                  |                    |
|------------|--------------------------------|--------------------------|------------|----------------------------------|--------------------|
|            |                                | Rea                      | TS         | Pro-O <sub>2</sub> <sup>2-</sup> | Pro-O <sub>2</sub> |
| doublet    | $\alpha\alpha\beta\beta\alpha$ | -3366.2464               | -3366.2049 | -3366.2247                       | -3366.2353         |
|            | $\alpha\beta\alpha\beta\alpha$ | -3366.2522               | -3366.2041 | -3366.2279                       | -3366.2212         |
|            | $\alpha\beta\beta\alpha\alpha$ | -3366.2179               | -3366.2028 | -3366.2303                       | -3366.1892         |
|            | $\beta\alpha\alpha\beta\alpha$ | -3366.2541               | -3366.1894 | -3366.1939                       | -3366.1777         |
|            | $\beta\alpha\beta\alpha\alpha$ | -3366.2164               | -3366.1947 | -3366.2278                       | -3366.1750         |

|        |                                  |                                 |            |            |            |
|--------|----------------------------------|---------------------------------|------------|------------|------------|
|        | $\beta\beta\alpha\alpha$         | -3366.2144                      | -3366.1815 | -3366.1882 | -3366.2191 |
| sextet | $\alpha\alpha\beta\beta$         | -3366.2181                      | -3366.1863 | -3366.1921 | -3366.2416 |
|        | $\alpha\alpha\beta\alpha\beta$   | -3366.2554                      | -3366.1901 | -3366.1937 | -3366.2394 |
|        | $\alpha\beta\alpha\alpha\beta$   | -3366.2497                      | -3366.1876 | -3366.1914 | -3366.1899 |
|        | $\beta\alpha\alpha\alpha\beta$   | -3366.2473                      | -3366.2064 | -3366.2296 | -3366.2354 |
|        | $\alpha\alpha\alpha\beta\alpha$  | -3366.2549                      | -3366.2076 | -3366.2287 | -3366.2258 |
| octet  | $\alpha\alpha\beta\alpha\alpha$  | -3366.2181                      | -3366.2016 | -3366.2293 | -3366.2394 |
|        | $\alpha\beta\alpha\alpha\alpha$  | -3366.2141                      | -3366.1982 | -3366.2291 | -3366.1985 |
|        | $\beta\alpha\alpha\alpha\alpha$  | -3366.2173                      | -3366.1814 | -3366.2296 | -3366.2239 |
|        | 12-et                            | $\alpha\alpha\alpha\alpha\beta$ | -3366.2514 | -3366.1878 | -3366.1900 |
| 14-et  | $\alpha\alpha\alpha\alpha\alpha$ | -3366.2169                      | -3366.2002 | -3366.2270 | -3366.2340 |

| Spin state | Spin topology<br>(Mn1~Mn4-O10)   | Relative Gibbs Free energy (kcal/mol) |                                  |                        |                                 |                            |
|------------|----------------------------------|---------------------------------------|----------------------------------|------------------------|---------------------------------|----------------------------|
|            |                                  | $\Delta G(\text{Rea-Pro-O}_2^{2-})$   |                                  |                        |                                 |                            |
|            |                                  | $\Delta G^\ddagger(\text{Rea-TS})$    | Pro-O <sub>2</sub> <sup>2-</sup> | $\Delta G(\text{Rea})$ | $\Delta G(\text{Pro-O}_2^{2-})$ | $\Delta G(\text{Pro-O}_2)$ |
| doublet    | $\alpha\alpha\beta\beta\alpha$   | 26.0                                  | 13.6                             | 5.6                    | 3.1                             | 4.0                        |
|            | $\alpha\beta\alpha\beta\alpha$   | 30.2                                  | 15.2                             | 2.0                    | 1.1                             | 12.8                       |
|            | $\alpha\beta\beta\alpha\alpha$   | 9.5                                   | -7.8                             | 23.5                   | -0.4                            | 32.9                       |
|            | $\beta\alpha\alpha\beta\alpha$   | 40.6                                  | 37.8                             | 0.8                    | 22.4                            | 40.1                       |
|            | $\beta\alpha\beta\alpha\alpha$   | 13.6                                  | -7.2                             | 24.5                   | 1.1                             | 41.8                       |
|            | $\beta\beta\alpha\alpha\alpha$   | 20.6                                  | 16.4                             | 25.7                   | 26.0                            | 14.1                       |
| sextet     | $\alpha\alpha\alpha\beta\beta$   | 20.0                                  | 16.3                             | 23.4                   | 23.5                            | 0.0                        |
|            | $\alpha\alpha\beta\alpha\beta$   | 41.0                                  | 38.7                             | 0.0                    | 22.5                            | 1.4                        |
|            | $\alpha\beta\alpha\alpha\beta$   | 39.0                                  | 36.6                             | 3.6                    | 24.0                            | 32.4                       |
|            | $\beta\alpha\alpha\alpha\beta$   | 25.7                                  | 11.1                             | 5.1                    | 0.0                             | 3.9                        |
| octet      | $\alpha\alpha\alpha\beta\alpha$  | 29.7                                  | 16.4                             | 0.3                    | 0.6                             | 9.9                        |
|            | $\alpha\alpha\beta\alpha\alpha$  | 10.4                                  | -7.0                             | 23.4                   | 0.2                             | 1.4                        |
|            | $\alpha\beta\alpha\alpha\alpha$  | 10.0                                  | -9.4                             | 25.9                   | 0.3                             | 27.0                       |
|            | $\beta\alpha\alpha\alpha\alpha$  | 22.5                                  | -7.7                             | 23.9                   | 0.0                             | 11.1                       |
| 12-et      | $\alpha\alpha\alpha\alpha\beta$  | 39.9                                  | 38.5                             | 2.5                    | 24.8                            | 31.9                       |
| 14-et      | $\alpha\alpha\alpha\alpha\alpha$ | 10.5                                  | -6.3                             | 24.2                   | 1.6                             | 4.8                        |

| Spin state | Spin topology<br>(Mn1~Mn4-O10) | Mulliken spin density |          |         |                    |       |
|------------|--------------------------------|-----------------------|----------|---------|--------------------|-------|
|            |                                | Rea                   | TS       | Pro-O-O | Pro-O <sub>2</sub> |       |
|            |                                | doublet               | $\alpha$ | Mn1     | 2.93               | 3.42  |
| $\alpha$   | Mn2                            |                       | 2.94     | 2.95    | 2.97               | 2.94  |
| $\beta$    | Mn3                            |                       | -2.90    | -2.80   | -2.87              | -3.81 |
| $\beta$    | Mn4                            |                       | -1.87    | -2.78   | -2.88              | -3.90 |
|            | O4                             |                       | -0.05    | -0.19   | -0.18              | -0.11 |
| $\alpha$   | O5                             |                       | 0.01     | 0.00    | 0.02               | 1.00  |
|            | O10                            |                       | -0.15    | 0.35    | -0.01              | 1.00  |
| $\alpha$   | Mn1                            |                       | 2.93     | 3.37    | 3.89               | 3.85  |
| $\beta$    | Mn2                            |                       | -2.93    | -2.93   | -2.91              | -2.90 |
| $\alpha$   | Mn3                            |                       | 2.88     | 2.83    | 2.81               | 3.78  |

|          |          |      |       |       |       |       |
|----------|----------|------|-------|-------|-------|-------|
|          | $\beta$  | Mn4  | -1.81 | -2.72 | -2.80 | -3.81 |
|          |          | O4   | -0.03 | 0.04  | 0.00  | -0.03 |
|          | $\alpha$ | O5   | 0.03  | -0.08 | -0.05 | 0.00  |
|          |          | O10  | -0.11 | 0.41  | -0.01 | 0.00  |
|          | $\alpha$ | Mn1  | 2.92  | 3.38  | 3.88  | 3.85  |
|          | $\beta$  | Mn2  | -2.93 | -2.92 | -2.91 | -2.91 |
|          | $\beta$  | Mn3  | -2.82 | -2.78 | -2.83 | -1.87 |
|          | $\alpha$ | Mn4  | 2.64  | 2.76  | 2.82  | 3.83  |
|          |          | O4   | 0.06  | -0.03 | -0.03 | -0.03 |
|          | $\alpha$ | O5   | 0.02  | -0.04 | 0.03  | -1.00 |
|          |          | O10  | 0.85  | 0.57  | 0.01  | -1.00 |
|          | $\beta$  | Mn1  | -2.91 | -2.46 | -2.01 | -3.88 |
|          | $\alpha$ | Mn2  | 2.92  | 2.93  | 2.90  | 2.94  |
|          | $\alpha$ | Mn3  | 2.89  | 2.88  | 2.83  | 3.80  |
|          | $\beta$  | Mn4  | -1.81 | -2.68 | -2.80 | -1.86 |
|          |          | O4   | -0.04 | 0.02  | 0.02  | -0.09 |
|          | $\alpha$ | O5   | -0.01 | -0.01 | -0.04 | 0.02  |
|          |          | O10  | -0.11 | 0.23  | 0.01  | 0.01  |
|          | $\beta$  | Mn1  | -2.92 | -2.84 | -3.88 | -3.84 |
|          | $\alpha$ | Mn2  | 2.93  | 2.94  | 2.92  | 2.92  |
|          | $\beta$  | Mn3  | -2.81 | -2.72 | -2.80 | -1.89 |
|          | $\alpha$ | Mn4  | 2.64  | 3.39  | 3.84  | 3.84  |
|          |          | O4   | 0.05  | -0.17 | -0.19 | -0.04 |
|          | $\alpha$ | O5   | -0.02 | 0.13  | 0.48  | 0.02  |
|          |          | O10  | 0.85  | 0.24  | 0.62  | 0.03  |
|          | $\beta$  | Mn1  | -2.92 | -2.53 | -2.02 | -3.84 |
|          | $\beta$  | Mn2  | -2.94 | -2.92 | 2.91  | -2.94 |
|          | $\alpha$ | Mn3  | 2.86  | 2.84  | 2.85  | 3.81  |
|          | $\alpha$ | Mn4  | 2.70  | 2.92  | 2.88  | 3.90  |
|          |          | O4   | 0.24  | 0.20  | 0.20  | 0.11  |
|          | $\alpha$ | O5   | -0.02 | 0.03  | -0.02 | 0.01  |
|          |          | O10  | 0.82  | 0.39  | -0.01 | 0.00  |
| sextet   | $\alpha$ | Mn1  | 2.92  | 2.54  | 2.03  | 3.85  |
|          | $\alpha$ | Mn2  | 2.92  | 2.91  | 2.90  | 3.00  |
|          | $\alpha$ | Mn3  | 2.82  | 2.76  | 2.80  | 3.82  |
|          | $\beta$  | Mn4  | -2.61 | -2.86 | -2.81 | -3.83 |
|          |          | O4   | -0.14 | 0.01  | -0.02 | -0.03 |
|          | $\beta$  | O5   | 0.04  | -0.07 | -0.05 | -1.00 |
|          |          | O10  | -0.87 | -0.37 | 0.00  | -1.00 |
|          | $\alpha$ | Mn1  | 2.92  | 2.49  | 2.03  | 3.85  |
|          | $\alpha$ | Mn2  | 2.93  | 2.93  | 2.92  | 2.94  |
|          | $\beta$  | Mn3  | -2.86 | -2.84 | -2.79 | -3.77 |
| $\alpha$ | Mn4      | 1.81 | 2.68  | 2.81  | 3.83  |       |
|          | O4       | 0.03 | -0.03 | -0.03 | 0.03  |       |

|       |          |     |       |       |       |       |
|-------|----------|-----|-------|-------|-------|-------|
|       | $\beta$  | O5  | 0.02  | 0.00  | 0.03  | -1.00 |
|       |          | O10 | 0.11  | -0.22 | 0.00  | -1.00 |
|       | $\alpha$ | Mn1 | 2.92  | 2.49  | 2.03  | 3.85  |
|       | $\beta$  | Mn2 | 2.93  | 2.93  | 2.92  | 2.94  |
|       | $\alpha$ | Mn3 | -2.86 | -2.84 | -2.79 | -3.77 |
|       | $\alpha$ | Mn4 | 1.81  | 2.68  | 2.81  | 2.83  |
|       |          | O4  | 0.03  | -0.03 | -0.03 | 0.03  |
|       | $\beta$  | O5  | 0.02  | 0.01  | 0.03  | -1.00 |
|       |          | O10 | 0.11  | -0.22 | 0.00  | -1.00 |
|       | $\beta$  | Mn1 | -2.91 | -3.39 | -3.88 | -3.84 |
|       | $\alpha$ | Mn2 | 2.93  | 2.93  | 2.91  | 2.95  |
|       | $\alpha$ | Mn3 | 2.94  | 2.84  | 2.89  | 3.84  |
|       | $\alpha$ | Mn4 | 1.87  | 2.79  | 2.87  | 3.90  |
|       |          | O4  | 0.04  | 0.18  | 0.15  | 0.11  |
|       | $\beta$  | O5  | 0.00  | 0.01  | -0.03 | -1.00 |
|       |          | O10 | 0.15  | -0.36 | 0.01  | -1.00 |
|       | $\alpha$ | Mn1 | 2.93  | 3.41  | 3.89  | 3.85  |
|       | $\alpha$ | Mn2 | 2.92  | 2.95  | 2.97  | 3.00  |
|       | $\alpha$ | Mn3 | 2.89  | 2.87  | 2.85  | 3.81  |
|       | $\beta$  | Mn4 | -1.81 | -2.72 | -2.79 | -3.83 |
|       |          | O4  | -0.04 | 0.03  | -0.01 | -0.03 |
|       | $\alpha$ | O5  | 0.05  | -0.07 | -0.04 | 0.00  |
|       |          | O10 | -0.11 | 0.40  | 0.00  | 0.00  |
|       | $\alpha$ | Mn1 | 2.93  | 3.41  | 3.89  | 3.85  |
|       | $\alpha$ | Mn2 | 2.94  | 2.95  | 2.97  | 2.94  |
|       | $\beta$  | Mn3 | -2.79 | -2.75 | -2.80 | -3.77 |
|       | $\alpha$ | Mn4 | 2.64  | 2.76  | 2.82  | 3.83  |
|       |          | O4  | 0.05  | -0.03 | -0.03 | 0.03  |
|       | $\alpha$ | O5  | 0.03  | -0.03 | 0.03  | -1.00 |
|       |          | O10 | 0.85  | 0.56  | 0.02  | -1.00 |
| octet | $\alpha$ | Mn1 | 2.93  | 3.41  | 3.89  | 3.89  |
|       | $\beta$  | Mn2 | -2.93 | -2.93 | -2.91 | -2.89 |
|       | $\alpha$ | Mn3 | 2.89  | 2.90  | 2.88  | 3.80  |
|       | $\alpha$ | Mn4 | 2.72  | 2.81  | 2.89  | -1.83 |
|       |          | O4  | 0.20  | 0.78  | 0.16  | -0.08 |
|       | $\alpha$ | O5  | 0.03  | -0.13 | -0.03 | 0.99  |
|       |          | O10 | 0.83  | 0.61  | 0.01  | 1.00  |
|       | $\beta$  | Mn1 | 2.91  | -2.50 | -3.88 | -3.84 |
|       | $\alpha$ | Mn2 | 2.93  | 2.91  | 2.91  | 2.95  |
|       | $\alpha$ | Mn3 | 2.89  | 2.86  | 2.89  | 3.84  |
|       | $\alpha$ | Mn4 | 2.72  | 2.91  | 2.87  | 3.90  |
|       |          | O4  | 0.20  | 0.17  | 0.15  | 0.11  |
|       | $\alpha$ | O5  | 0.00  | 0.02  | -0.03 | 0.00  |
|       |          | O10 | 0.82  | 0.40  | 0.01  | 0.00  |

|       |          |      |       |       |       |       |
|-------|----------|------|-------|-------|-------|-------|
| 12-et | $\alpha$ | Mn1  | 2.92  | 2.49  | 2.03  | 3.85  |
|       | $\alpha$ | Mn2  | 2.93  | 2.91  | 2.90  | 2.96  |
|       | $\alpha$ | Mn3  | 2.94  | 2.80  | 2.87  | 1.94  |
|       | $\alpha$ | Mn4  | 1.87  | 2.79  | 2.87  | 2.89  |
|       |          | O4   | 0.04  | 0.17  | 0.17  | 0.16  |
|       | $\beta$  | O5   | 0.05  | -0.06 | -0.04 | -1.00 |
|       | O10      | 0.15 | -0.26 | -0.02 | -1.00 |       |
| 14-et | $\alpha$ | Mn1  | 2.93  | 3.42  | 3.89  | 3.85  |
|       | $\alpha$ | Mn2  | 2.93  | 2.95  | 2.97  | 3.00  |
|       | $\alpha$ | Mn3  | 2.92  | 2.94  | 2.93  | 3.85  |
|       | $\alpha$ | Mn4  | 2.71  | 2.82  | 2.89  | 3.90  |
|       |          | O4   | 0.22  | 0.19  | 0.18  | 0.11  |
|       | $\alpha$ | O5   | 0.05  | -0.10 | -0.02 | -1.01 |
|       | O10      | 0.83 | 0.59  | 0.02  | -0.99 |       |

### Rea:

|    |             |             |             |   |             |             |             |
|----|-------------|-------------|-------------|---|-------------|-------------|-------------|
| Ca | -2.70854800 | 0.54568200  | -0.74851800 | H | -5.13478200 | 3.98409300  | -1.68527800 |
| Mn | -0.26397600 | -1.73469500 | -0.27778000 | H | -5.50077300 | 5.64827200  | -1.17256700 |
| Mn | -1.37097500 | -0.93388900 | 2.05105100  | O | -0.96004800 | -2.59062300 | -1.87100200 |
| Mn | 0.23898700  | 0.87190500  | 0.74821100  | C | -2.13665800 | -2.47220400 | -2.39735400 |
| Mn | 0.50616600  | 3.46700900  | -1.21267400 | O | -2.89794200 | -1.49430100 | -2.24030100 |
| O  | -1.90885400 | -1.58594100 | 0.44914000  | C | -2.53927100 | -3.64614700 | -3.28512800 |
| O  | 0.37143800  | -0.98678800 | 1.29609100  | H | -1.72947200 | -3.79963200 | -4.01451000 |
| O  | -1.45458700 | 0.74089100  | 1.39794500  | H | -2.52884300 | -4.54566900 | -2.65032400 |
| O  | -0.23450500 | 0.00139600  | -0.83176400 | C | -3.88863000 | -3.49152900 | -3.99087200 |
| O  | -0.00673800 | 2.52497900  | 0.20164900  | H | -3.88499000 | -2.56615700 | -4.58375700 |
| O  | -5.06809300 | 0.08352700  | -1.50363300 | H | -4.67856000 | -3.36565200 | -3.23687500 |
| H  | -5.36440000 | -0.19482900 | -0.61344400 | C | -4.21822700 | -4.68788000 | -4.89061500 |
| H  | -4.83277900 | -0.73568600 | -1.98311300 | H | -3.46066900 | -4.81735400 | -5.67636000 |
| O  | -2.16748400 | 1.17302300  | -3.10021100 | H | -5.19027800 | -4.55768500 | -5.38349500 |
| H  | -1.91196800 | 0.34983000  | -3.54886400 | H | -4.25891600 | -5.62263900 | -4.31392400 |
| H  | -1.33434900 | 1.70582300  | -3.03142900 | N | 1.61200300  | -2.08621400 | -1.06843000 |
| O  | 1.11330500  | 4.39783000  | -2.70891800 | C | 2.20289500  | -1.39348200 | -2.10446100 |
| H  | 2.03201100  | 4.09076000  | -2.84403600 | H | 1.68339300  | -0.57382800 | -2.58327500 |
| O  | 0.90920400  | 5.03345300  | 0.25719900  | C | 3.45985500  | -1.90291600 | -2.32890000 |
| H  | 0.10013700  | 5.54608300  | 0.05381400  | N | 3.60672000  | -2.93356500 | -1.40507800 |
| H  | 0.66033100  | 4.46327900  | 1.01523800  | H | 4.51414300  | -3.31291500 | -1.12844200 |
| O  | -2.73227300 | 2.93093400  | -0.87695800 | C | 2.48227000  | -2.99462000 | -0.65570600 |
| C  | -2.36534800 | 4.08165700  | -1.14303200 | H | 2.31827600  | -3.68255000 | 0.16073200  |
| O  | -1.13326400 | 4.47327600  | -1.32533600 | C | 4.50572700  | -1.53498400 | -3.34759200 |
| C  | -3.37941300 | 5.21316400  | -1.30628800 | H | 4.29620400  | -2.03337100 | -4.30637600 |
| H  | -3.06519400 | 6.04304900  | -0.65651200 | H | 4.41414300  | -0.45852500 | -3.54553900 |
| H  | -3.26993600 | 5.58958900  | -2.33392800 | C | 5.97274300  | -1.87421400 | -2.96122100 |
| C  | -4.82249600 | 4.79868700  | -1.02189500 | H | 6.15259100  | -2.95094100 | -3.05641600 |
| H  | -4.93756700 | 4.44591200  | 0.01020900  | H | 6.64583800  | -1.36810800 | -3.66668900 |

|   |             |             |             |   |             |             |             |
|---|-------------|-------------|-------------|---|-------------|-------------|-------------|
| C | 6.28861700  | -1.50133200 | -1.51549300 | H | -0.53253700 | -6.31827500 | 4.23628900  |
| O | 6.21650000  | -2.33980200 | -0.60948400 | H | 0.10490300  | -4.67945100 | 4.49990600  |
| N | 6.56852300  | -0.18980600 | -1.28111000 | H | -1.62271300 | -4.91120700 | 4.20889000  |
| H | 6.56152600  | 0.44161200  | -2.07299000 | O | -4.30845300 | -0.03829600 | 1.11057000  |
| C | 6.47372200  | 0.39385900  | 0.06071400  | C | -4.20759000 | -0.52206000 | 2.25639000  |
| H | 6.89706800  | -0.33494500 | 0.75837900  | O | -3.10599200 | -0.91158000 | 2.81995400  |
| H | 7.10602100  | 1.29092000  | 0.08111500  | C | -5.43597200 | -0.70936100 | 3.12938000  |
| C | 5.02114700  | 0.71913400  | 0.45712500  | H | -5.28293500 | -0.21152300 | 4.09434500  |
| H | 4.43345200  | -0.20560500 | 0.44228600  | H | -5.57914100 | -1.77785500 | 3.33530900  |
| H | 5.01049100  | 1.07830200  | 1.49579900  | O | -0.50653300 | -0.19667600 | 3.69330800  |
| C | 4.37045900  | 1.75724800  | -0.46096300 | C | 0.35035700  | 0.74578700  | 3.66275200  |
| H | 4.54886900  | 1.50017400  | -1.51728200 | O | 0.80735500  | 1.32980800  | 2.62600200  |
| H | 4.80366800  | 2.75652700  | -0.31846000 | C | 0.87524500  | 1.23393800  | 5.00586200  |
| C | 2.85076200  | 1.89331200  | -0.34519400 | H | 0.42777100  | 2.22450900  | 5.18591000  |
| O | 2.21695900  | 0.99179600  | 0.26393200  | H | 0.50046900  | 0.55901700  | 5.78406000  |
| O | 2.38480600  | 2.92608300  | -0.93739600 | C | 2.40745800  | 1.34769300  | 5.05932500  |
| O | -0.08901800 | -3.53350200 | 0.69087700  | H | 2.74187600  | 2.01213600  | 4.25217500  |
| C | -0.51615800 | -3.71137300 | 1.88268900  | H | 2.84882500  | 0.36065100  | 4.85464200  |
| O | -1.04158400 | -2.83911100 | 2.64083600  | C | 2.90498100  | 1.86543200  | 6.41287900  |
| C | -0.39233400 | -5.13154000 | 2.42623000  | H | 2.50246600  | 2.86521000  | 6.62869500  |
| H | 0.59766600  | -5.50865500 | 2.13517200  | H | 4.00043300  | 1.93556700  | 6.43163800  |
| H | -1.11679700 | -5.73998100 | 1.86271300  | H | 2.59912300  | 1.20097500  | 7.23285700  |
| H | -6.32362200 | -0.30411700 | 2.63608600  | O | 0.23460600  | 2.28850200  | -2.45732000 |
| C | -0.62509800 | -5.26809700 | 3.93114300  |   |             |             |             |

**TS:**

|    |             |             |             |   |             |             |             |
|----|-------------|-------------|-------------|---|-------------|-------------|-------------|
| Ca | 2.78758700  | -0.65602900 | -0.60169500 | H | -0.28155200 | -5.55915500 | -0.22684600 |
| Mn | 0.26152700  | 1.62539800  | -0.44867400 | H | -0.80325300 | -4.64516200 | 0.91822000  |
| Mn | 1.36279400  | 1.04746800  | 1.97034000  | O | 2.75671600  | -3.01297300 | -0.46867300 |
| Mn | -0.24710500 | -0.93062300 | 0.95857200  | C | 2.31105800  | -4.07876700 | -0.91167200 |
| Mn | -0.54872100 | -3.27196700 | -1.07572900 | O | 1.07665800  | -4.30914000 | -1.25920100 |
| O  | 1.89859700  | 1.49500600  | 0.29957800  | C | 3.22258800  | -5.28958400 | -1.10918900 |
| O  | -0.35725000 | 0.99206000  | 1.19971900  | H | 2.81723100  | -6.11336600 | -0.50193100 |
| O  | 1.45661400  | -0.70835500 | 1.53517500  | H | 3.10682300  | -5.61067000 | -2.15392400 |
| O  | 0.23228600  | -0.36378300 | -0.79123400 | C | 4.68823400  | -5.02405300 | -0.76819000 |
| O  | -0.13168200 | -2.63174900 | 0.56234900  | H | 4.80222000  | -4.72044300 | 0.27907600  |
| O  | 5.13912900  | -0.22432800 | -1.39705800 | H | 5.09607200  | -4.21966100 | -1.39141200 |
| H  | 5.43265300  | 0.12912600  | -0.53306400 | H | 5.28871100  | -5.92773600 | -0.93381000 |
| H  | 4.89963100  | 0.55030900  | -1.94389000 | O | 0.98693400  | 2.28854300  | -2.12918400 |
| O  | 2.36235600  | -1.45268400 | -2.94487800 | C | 2.18236900  | 2.17050000  | -2.60520300 |
| H  | 2.36720700  | -0.61230200 | -3.43556000 | O | 2.96655400  | 1.23089100  | -2.34246000 |
| H  | 1.40879500  | -1.69929500 | -2.84402200 | C | 2.58473000  | 3.27945400  | -3.57227200 |
| O  | -1.04748100 | -3.96842800 | -2.68910700 | H | 1.79113300  | 3.35791800  | -4.33064000 |
| H  | -1.98327000 | -3.71962900 | -2.81535300 | H | 2.53914000  | 4.22485900  | -3.00954300 |
| O  | -1.06844600 | -5.05544600 | 0.06727700  | C | 3.95528100  | 3.10241600  | -4.23037200 |



|   |             |             |             |   |             |             |             |
|---|-------------|-------------|-------------|---|-------------|-------------|-------------|
| H | 3.98629300  | 2.13549900  | -4.75216800 | O | -2.25695900 | -0.96536800 | 0.53495700  |
| H | 4.72742500  | 3.05082900  | -3.44975700 | O | -2.43138900 | -2.76712300 | -0.84435400 |
| C | 4.28426600  | 4.23458400  | -5.20981900 | O | 0.06809600  | 3.54672500  | 0.38924600  |
| H | 3.54499800  | 4.28803500  | -6.02135600 | C | 0.50159100  | 3.80804200  | 1.55787800  |
| H | 5.27123400  | 4.08894700  | -5.66743300 | O | 1.04297900  | 2.99030500  | 2.36959300  |
| H | 4.29129800  | 5.21060900  | -4.70457100 | C | 0.36981500  | 5.25804400  | 2.01765500  |
| N | -1.60811600 | 1.85604700  | -1.29310900 | H | -0.65034400 | 5.58391600  | 1.77063800  |
| C | -2.21708900 | 1.03586200  | -2.22186100 | H | 1.03268900  | 5.84912000  | 1.36711600  |
| H | -1.71931000 | 0.14264900  | -2.57949300 | H | 6.32293600  | 0.56382100  | 2.71828100  |
| C | -3.46120700 | 1.54077500  | -2.51986500 | C | 0.69290600  | 5.50402800  | 3.49146400  |
| N | -3.57965300 | 2.69818900  | -1.75607200 | H | 0.58214700  | 6.56916800  | 3.73241900  |
| H | -4.47543300 | 3.14179100  | -1.54429300 | H | 0.02301700  | 4.93194200  | 4.14452400  |
| C | -2.45441600 | 2.83812000  | -1.01973100 | H | 1.71860900  | 5.19917200  | 3.72625500  |
| H | -2.26889300 | 3.63313000  | -0.31185500 | O | 4.34874700  | 0.10890000  | 1.18541500  |
| C | -4.52028700 | 1.05531700  | -3.47427600 | C | 4.21179200  | 0.70179100  | 2.27648200  |
| H | -4.29659900 | 1.39545500  | -4.49683700 | O | 3.09251700  | 1.12894500  | 2.76671400  |
| H | -4.46276000 | -0.04104400 | -3.50627800 | C | 5.41524700  | 0.98628200  | 3.15770300  |
| C | -5.97624800 | 1.49432300  | -3.14919500 | H | 5.24959600  | 0.56068300  | 4.15475700  |
| H | -6.12370900 | 2.54861000  | -3.40887400 | H | 5.53022700  | 2.07036300  | 3.28352100  |
| H | -6.66498900 | 0.90632400  | -3.77109600 | O | 0.51137600  | 0.51914200  | 3.70199800  |
| C | -6.30080700 | 1.35636500  | -1.66449000 | C | -0.33249300 | -0.42558300 | 3.80017000  |
| O | -6.20377000 | 2.32137600  | -0.89733000 | O | -0.79422000 | -1.13551000 | 2.84413400  |
| N | -6.61410600 | 0.10412100  | -1.23094300 | C | -0.84418900 | -0.75671100 | 5.19357000  |
| H | -6.62379500 | -0.64085900 | -1.91710700 | H | -0.41720300 | -1.73368000 | 5.46993500  |
| C | -6.50419300 | -0.27123600 | 0.18286100  | H | -0.44277400 | -0.01144600 | 5.88987500  |
| H | -6.90864400 | 0.55947600  | 0.76878500  | C | -2.37815400 | -0.82719500 | 5.27796700  |
| H | -7.14466900 | -1.14718400 | 0.34786000  | H | -2.73889400 | -1.56499000 | 4.54978200  |
| C | -5.04680800 | -0.54885900 | 0.59888900  | H | -2.80017500 | 0.14333400  | 4.97651200  |
| H | -4.45407600 | 0.35661400  | 0.42566100  | C | -2.86558700 | -1.18792500 | 6.68504500  |
| H | -5.01335000 | -0.73623800 | 1.68067400  | H | -2.48235800 | -2.16898200 | 6.99921400  |
| C | -4.42768700 | -1.72742800 | -0.15910700 | H | -3.96189800 | -1.22915700 | 6.72552800  |
| H | -4.69759900 | -1.69574000 | -1.22465400 | H | -2.53190600 | -0.44859700 | 7.42629700  |
| H | -4.80920100 | -2.69010800 | 0.21184500  | O | -0.15599600 | -1.77781700 | -1.96142800 |
| C | -2.90127000 | -1.81099500 | -0.13427000 |   |             |             |             |

**Pro-O<sub>2</sub><sup>2-</sup>:**

|    |             |             |             |   |             |             |             |
|----|-------------|-------------|-------------|---|-------------|-------------|-------------|
| Ca | -2.84567900 | 0.62618900  | -0.54129300 | O | 0.20073100  | 2.76425000  | 0.68926700  |
| Mn | -0.28571800 | -1.85532400 | -0.53227800 | O | -5.18659500 | 0.13019900  | -1.29639500 |
| Mn | -1.25121200 | -1.04381700 | 1.89583600  | H | -5.44706500 | -0.24305500 | -0.42971300 |
| Mn | 0.29057100  | 1.02552200  | 0.92832500  | H | -4.93998200 | -0.62731000 | -1.86383900 |
| Mn | 0.47660000  | 3.40449800  | -0.98848500 | O | -2.48749100 | 1.47350900  | -2.88638300 |
| O  | -1.87987300 | -1.51774600 | 0.27085200  | H | -2.45540400 | 0.62477900  | -3.36352600 |
| O  | 0.38453600  | -0.92995300 | 1.00544700  | H | -1.55657100 | 1.78674500  | -2.82499800 |
| O  | -1.38941100 | 0.73209900  | 1.51142100  | O | 0.85959600  | 4.15068100  | -2.59719000 |
| O  | -0.30169800 | 0.76097600  | -0.87892800 | H | 1.81198100  | 4.00657300  | -2.75322300 |

|   |             |             |             |   |             |             |             |
|---|-------------|-------------|-------------|---|-------------|-------------|-------------|
| O | 1.02475600  | 5.17920900  | 0.11183700  | C | 6.52312900  | 0.43629700  | -0.06798300 |
| H | 0.21062300  | 5.67009400  | -0.12556800 | H | 6.96517800  | -0.34556100 | 0.55686200  |
| H | 0.82649000  | 4.75567000  | 0.97578400  | H | 7.15337100  | 1.33139600  | 0.01088300  |
| O | -2.81689100 | 2.97812500  | -0.35659900 | C | 5.07928800  | 0.71982900  | 0.38743400  |
| C | -2.40681500 | 4.09596300  | -0.69015800 | H | 4.49484100  | -0.20354800 | 0.30498500  |
| O | -1.19063200 | 4.38776400  | -1.05382200 | H | 5.08895300  | 0.98524500  | 1.45355100  |
| C | -3.34543100 | 5.30193100  | -0.71865500 | C | 4.40754500  | 1.83166300  | -0.42298600 |
| H | -2.95367000 | 6.04107000  | -0.00285600 | H | 4.59006100  | 1.69243300  | -1.49966300 |
| H | -3.24439900 | 5.76802100  | -1.70868500 | H | 4.82163900  | 2.82000000  | -0.17833200 |
| C | -4.80216500 | 4.95930400  | -0.40926100 | C | 2.88833600  | 1.92898600  | -0.28616400 |
| H | -4.90013100 | 4.51400900  | 0.58759900  | O | 2.27432200  | 1.04231600  | 0.35655000  |
| H | -5.19805400 | 4.23778700  | -1.13366700 | O | 2.38128500  | 2.93350800  | -0.89823800 |
| H | -5.42365000 | 5.86310600  | -0.44756400 | O | 0.00922300  | -3.71599700 | 0.50338800  |
| O | -1.11316900 | -2.46224100 | -2.18562200 | C | -0.40393600 | -3.85533600 | 1.69425100  |
| C | -2.30461100 | -2.23974400 | -2.63173900 | O | -0.92926600 | -2.94612500 | 2.41699300  |
| O | -2.99099000 | -1.22664800 | -2.36281800 | C | -0.27908200 | -5.24438000 | 2.31556100  |
| C | -2.83466100 | -3.31599700 | -3.57391400 | H | 0.72678400  | -5.61559000 | 2.07416800  |
| H | -2.09844400 | -3.43011000 | -4.38445900 | H | -0.97276600 | -5.89347500 | 1.75889700  |
| H | -2.80370800 | -4.26829300 | -3.02271500 | H | -6.19338100 | -0.61955700 | 2.91573500  |
| C | -4.23226800 | -3.05701200 | -4.14147000 | C | -0.55630800 | -5.31624400 | 3.81730400  |
| H | -4.24383100 | -2.08303800 | -4.65034800 | H | -0.45630500 | -6.34922500 | 4.17522000  |
| H | -4.95058500 | -2.97589700 | -3.31279800 | H | 0.14520200  | -4.68811900 | 4.37963400  |
| C | -4.68418800 | -4.15723600 | -5.10830800 | H | -1.56756300 | -4.96393200 | 4.04819200  |
| H | -4.00235900 | -4.23881900 | -5.96645200 | O | -4.31778100 | -0.16035800 | 1.26860200  |
| H | -5.68917200 | -3.95329500 | -5.49950900 | C | -4.10576900 | -0.73616800 | 2.36090700  |
| H | -4.71112400 | -5.13806400 | -4.61327800 | O | -2.95579400 | -1.12091200 | 2.79819600  |
| N | 1.56716900  | -2.02971500 | -1.42763200 | C | -5.26148800 | -1.04546300 | 3.29775500  |
| C | 2.14453700  | -1.24679900 | -2.40701400 | H | -5.04637100 | -0.64418700 | 4.29516700  |
| H | 1.60243800  | -0.42615000 | -2.85890100 | H | -5.36564900 | -2.13322500 | 3.40194100  |
| C | 3.43158500  | -1.67643300 | -2.63174200 | O | -0.35036100 | -0.53797800 | 3.62887900  |
| N | 3.61151300  | -2.75175300 | -1.76872300 | C | 0.51249100  | 0.38153700  | 3.71972800  |
| H | 4.53148100  | -3.11663200 | -1.50943100 | O | 0.94361200  | 1.11367600  | 2.76128600  |
| C | 2.47857100  | -2.91646500 | -1.05075900 | C | 1.11295300  | 0.65888400  | 5.08851100  |
| H | 2.33198000  | -3.65731600 | -0.27728300 | H | 0.82266500  | 1.68165200  | 5.37352400  |
| C | 4.47762800  | -1.19072700 | -3.60115900 | H | 0.65947900  | -0.03349800 | 5.80690300  |
| H | 4.26724300  | -1.57787600 | -4.60962100 | C | 2.64762900  | 0.54184700  | 5.10175000  |
| H | 4.38550400  | -0.09860900 | -3.67654000 | H | 3.06065500  | 1.23037200  | 4.35299500  |
| C | 5.94561700  | -1.56775600 | -3.26013600 | H | 2.93377600  | -0.47321200 | 4.78772500  |
| H | 6.11836300  | -2.63359600 | -3.44721900 | C | 3.24055800  | 0.84194800  | 6.48224100  |
| H | 6.61203100  | -1.00736900 | -3.92994900 | H | 2.99376800  | 1.86240000  | 6.80745400  |
| C | 6.28485700  | -1.31600000 | -1.79350000 | H | 4.33451400  | 0.74991800  | 6.47157200  |
| O | 6.21355400  | -2.22403400 | -0.95618900 | H | 2.85474100  | 0.14881600  | 7.24252000  |
| N | 6.58619300  | -0.03286500 | -1.45640800 | O | 0.03700800  | 1.82220700  | -1.78939800 |
| H | 6.58246100  | 0.66225200  | -2.19297400 |   |             |             |             |

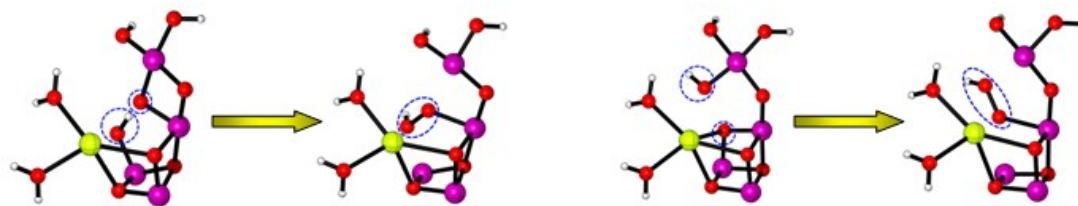

**Fig. S4** Pictorial exhibitions for the open (left) and closed-cubane (right) Wx (hydroxyl)-O5 (oxo) nucleophilic attack.

**Table S3** Reaction parameters for the open-cubane Wx (hydroxyl)-O5 (oxo) nucleophilic attack:

| Spin state | Spin topology<br>(Mn1~Mn4-O5/O10) | Gibbs Free energy (a.u.) |            |            |
|------------|-----------------------------------|--------------------------|------------|------------|
|            |                                   | Rea                      | TS         | Pro        |
| doublet    | $\alpha\alpha\beta\alpha$         | -3366.2139               | -3366.1928 | -3366.2195 |
|            | $\alpha\beta\alpha\beta$          | -3366.2152               | -3366.1908 | -3366.2207 |
|            | $\alpha\beta\beta\alpha$          | -3366.2130               | -3366.1956 | -3366.2219 |
|            | $\beta\alpha\alpha\beta$          | -3366.2175               | -3366.1878 | -3366.1895 |
|            | $\beta\alpha\beta\alpha$          | -3366.2168               | -3366.1887 | -3366.1890 |
|            | $\beta\beta\alpha\alpha$          | -3366.2149               | -3366.1876 | -3366.1880 |
| sextet     | $\alpha\alpha\alpha\beta\beta$    | -3366.2185               | -3366.1915 | -3366.1917 |
|            | $\alpha\alpha\beta\alpha\beta$    | -3366.2182               | -3366.1889 | -3366.1899 |
|            | $\alpha\beta\alpha\alpha\beta$    | -3366.2209               | -3366.1877 | -3366.1879 |
|            | $\beta\alpha\alpha\alpha\beta$    | -3366.2177               | -3366.1956 | -3366.2223 |
| octet      | $\alpha\alpha\alpha\beta\alpha$   | -3366.2141               | -3366.1899 | -3366.2214 |
|            | $\alpha\alpha\beta\alpha\alpha$   | -3366.2130               | -3366.1962 | -3366.2217 |
|            | $\alpha\beta\alpha\alpha\alpha$   | -3366.2167               | -3366.1928 | -3366.2216 |
|            | $\beta\alpha\alpha\alpha\alpha$   | -3366.2166               | -3366.1887 | -3366.1892 |
| 12-et      | $\alpha\alpha\alpha\alpha\beta$   | -3366.2219               | -3366.1898 | -3366.1902 |
| 14-et      | $\alpha\alpha\alpha\alpha\alpha$  | -3366.2166               | -3366.1926 | -3366.2211 |

  

| Spin state | Spin topology<br>(Mn1~Mn4-O5/O10) | Relative Gibbs Free energy (kcal/mol) |                            |                        |                        |
|------------|-----------------------------------|---------------------------------------|----------------------------|------------------------|------------------------|
|            |                                   | $\Delta G^\ddagger(\text{Rea-TS})$    | $\Delta G(\text{Rea-Pro})$ | $\Delta G(\text{Rea})$ | $\Delta G(\text{Pro})$ |
| doublet    | $\alpha\alpha\beta\beta\alpha$    | 13.9                                  | -3.7                       | 5.0                    | 1.8                    |
|            | $\alpha\beta\alpha\beta\alpha$    | 16.0                                  | -3.6                       | 4.2                    | 1.0                    |
|            | $\alpha\beta\beta\alpha\alpha$    | 11.4                                  | -5.9                       | 5.6                    | 0.3                    |
|            | $\beta\alpha\alpha\beta\alpha$    | 19.5                                  | 18.4                       | 2.8                    | 20.6                   |
|            | $\beta\alpha\beta\alpha\alpha$    | 18.5                                  | 18.3                       | 3.2                    | 20.9                   |
|            | $\beta\beta\alpha\alpha\alpha$    | 18.0                                  | 17.7                       | 4.4                    | 21.5                   |
| sextet     | $\alpha\alpha\alpha\beta\beta$    | 17.8                                  | 17.6                       | 2.1                    | 19.2                   |
|            | $\alpha\alpha\beta\alpha\beta$    | 19.3                                  | 18.6                       | 2.3                    | 20.3                   |
|            | $\alpha\beta\alpha\alpha\beta$    | 21.8                                  | 21.7                       | 0.6                    | 21.6                   |
|            | $\beta\alpha\alpha\alpha\beta$    | 14.5                                  | -3.0                       | 2.6                    | 0.0                    |
| octet      | $\alpha\alpha\alpha\beta\alpha$   | 15.9                                  | -4.8                       | 4.9                    | 0.6                    |

|       |                                  |      |      |     |      |
|-------|----------------------------------|------|------|-----|------|
|       | $\alpha\beta\alpha\alpha$        | 11.0 | -5.7 | 5.6 | 0.4  |
|       | $\alpha\beta\alpha\alpha\alpha$  | 15.7 | -3.2 | 3.3 | 0.4  |
|       | $\beta\alpha\alpha\alpha\alpha$  | 18.3 | 18.0 | 3.3 | 20.8 |
| 12-et | $\alpha\alpha\alpha\alpha\beta$  | 21.1 | 20.8 | 0.0 | 20.1 |
| 14-et | $\alpha\alpha\alpha\alpha\alpha$ | 15.8 | -3.0 | 3.3 | 0.8  |

| Spin state | Spin topology<br>(Mn1~Mn4-O5/O10) |     | Mulliken spin density |       |       |
|------------|-----------------------------------|-----|-----------------------|-------|-------|
|            |                                   |     | Rea                   | TS    | Pro   |
| doublet    | $\alpha$                          | Mn1 | 2.93                  | 3.37  | 3.90  |
|            | $\alpha$                          | Mn2 | 2.94                  | 2.95  | 2.98  |
|            | $\beta$                           | Mn3 | -2.86                 | -2.85 | -2.83 |
|            | $\beta$                           | Mn4 | -2.94                 | -2.92 | -2.94 |
|            | $\alpha$                          | O5  | 0.57                  | 0.37  | 0.05  |
|            | $\alpha$                          | O10 | 0.40                  | 0.17  | 0.01  |
|            | $\alpha$                          | Mn1 | 2.92                  | 3.37  | 3.89  |
|            | $\beta$                           | Mn2 | -2.92                 | -2.91 | -2.91 |
|            | $\alpha$                          | Mn3 | 2.79                  | 2.82  | 2.80  |
|            | $\beta$                           | Mn4 | -2.90                 | -2.86 | -2.88 |
|            | $\alpha$                          | O5  | 0.59                  | 0.36  | -0.01 |
|            | $\alpha$                          | O10 | 0.29                  | 0.13  | 0.02  |
|            | $\alpha$                          | Mn1 | 2.90                  | 3.30  | 3.89  |
|            | $\beta$                           | Mn2 | -2.92                 | -2.92 | -2.91 |
|            | $\beta$                           | Mn3 | -2.87                 | -2.84 | -2.82 |
|            | $\alpha$                          | Mn4 | 2.87                  | 2.92  | 2.88  |
|            | $\alpha$                          | O5  | 0.53                  | 0.35  | 0.01  |
|            | $\alpha$                          | O10 | 0.39                  | 0.17  | 0.01  |
|            | $\beta$                           | Mn1 | -2.91                 | -2.35 | -2.01 |
|            | $\alpha$                          | Mn2 | 2.92                  | 2.93  | 2.92  |
|            | $\alpha$                          | Mn3 | 2.83                  | 2.91  | 2.85  |
|            | $\beta$                           | Mn4 | -2.90                 | -2.85 | -2.86 |
|            | $\alpha$                          | O5  | 0.52                  | 0.16  | -0.01 |
|            | $\alpha$                          | O10 | 0.36                  | 0.10  | 0.02  |
|            | $\beta$                           | Mn1 | -2.92                 | -2.38 | -2.01 |
|            | $\alpha$                          | Mn2 | 2.91                  | 2.92  | 2.93  |
|            | $\beta$                           | Mn3 | -2.86                 | -2.76 | -2.78 |
|            | $\alpha$                          | Mn4 | 2.87                  | 2.93  | 2.88  |
|            | $\alpha$                          | O5  | 0.51                  | 0.20  | 0.02  |
|            | $\alpha$                          | O10 | 0.41                  | 0.11  | 0.02  |
|            | $\beta$                           | Mn1 | -2.93                 | -2.41 | -2.05 |
|            | $\beta$                           | Mn2 | -2.95                 | -2.94 | -2.95 |
|            | $\alpha$                          | Mn3 | 2.83                  | 2.92  | 2.86  |
|            | $\alpha$                          | Mn4 | 2.91                  | 2.99  | 2.94  |
|            | $\alpha$                          | O5  | 0.52                  | 0.14  | 0.19  |
|            | $\alpha$                          | O10 | 0.33                  | 0.11  | 0.02  |

|          |          |       |       |       |       |
|----------|----------|-------|-------|-------|-------|
|          | $\alpha$ | Mn1   | 2.94  | 2.39  | 2.05  |
|          | $\alpha$ | Mn2   | 2.94  | 2.93  | 2.94  |
|          | $\alpha$ | Mn3   | 2.89  | 2.80  | 2.81  |
|          | $\beta$  | Mn4   | -2.87 | -2.93 | -2.88 |
|          | $\beta$  | O5    | -0.50 | -0.19 | -0.03 |
|          | $\beta$  | O10   | -0.41 | -0.11 | -0.02 |
| sextet   | $\alpha$ | Mn1   | 2.94  | 2.38  | 2.04  |
|          | $\alpha$ | Mn2   | 2.95  | 2.94  | 2.95  |
|          | $\beta$  | Mn3   | -2.79 | -2.88 | -2.81 |
|          | $\alpha$ | Mn4   | 2.90  | 2.85  | 2.86  |
|          | $\beta$  | O5    | -0.53 | -0.17 | 0.01  |
|          | $\beta$  | O10   | -0.34 | -0.10 | -0.02 |
|          | $\alpha$ | Mn1   | 2.92  | 2.31  | 2.00  |
|          | $\beta$  | Mn2   | -2.91 | -2.92 | -2.93 |
|          | $\alpha$ | Mn3   | 2.86  | 2.81  | 2.82  |
|          | $\alpha$ | Mn4   | 2.94  | 2.91  | 2.93  |
|          | $\beta$  | O5    | -0.54 | -0.22 | -0.05 |
|          | $\beta$  | O10   | -0.41 | -0.10 | -0.02 |
|          | $\beta$  | Mn1   | -2.90 | -3.35 | -3.89 |
|          | $\alpha$ | Mn2   | 2.92  | 2.92  | 2.91  |
|          | $\alpha$ | Mn3   | 2.89  | 2.88  | 2.87  |
|          | $\alpha$ | Mn4   | 2.94  | 2.92  | 2.94  |
|          | $\beta$  | O5    | -0.56 | -0.34 | -0.04 |
|          | $\beta$  | O10   | -0.34 | -0.16 | -0.01 |
| octet    | $\alpha$ | Mn1   | 2.95  | 3.40  | 3.90  |
|          | $\alpha$ | Mn2   | 2.95  | 2.96  | 2.98  |
|          | $\alpha$ | Mn3   | 2.85  | 2.86  | 2.85  |
|          | $\beta$  | Mn4   | -2.90 | -2.86 | -2.88 |
|          | $\alpha$ | O5    | 0.57  | 0.35  | -0.01 |
|          | $\alpha$ | O10   | 0.32  | 0.13  | 0.02  |
|          | $\alpha$ | Mn1   | 2.93  | 3.34  | 3.90  |
|          | $\alpha$ | Mn2   | 2.94  | 2.95  | 2.98  |
|          | $\beta$  | Mn3   | -2.84 | -2.81 | -2.79 |
|          | $\alpha$ | Mn4   | 2.87  | 2.92  | 2.88  |
|          | $\alpha$ | O5    | 0.54  | 0.34  | 0.01  |
|          | $\alpha$ | O10   | 0.39  | 0.18  | 0.01  |
|          | $\alpha$ | Mn1   | 2.96  | 3.33  | 3.89  |
|          | $\beta$  | Mn2   | -2.92 | -2.91 | -2.90 |
|          | $\alpha$ | Mn3   | 2.85  | 2.86  | 2.84  |
|          | $\alpha$ | Mn4   | 2.86  | 2.98  | 2.94  |
|          | $\alpha$ | O5    | 0.51  | 0.34  | 0.01  |
|          | $\alpha$ | O10   | 0.42  | 0.20  | 0.01  |
| $\beta$  | Mn1      | -2.91 | -2.39 | -2.02 |       |
| $\alpha$ | Mn2      | 2.92  | 2.93  | 2.92  |       |

|       |          |     |       |       |       |
|-------|----------|-----|-------|-------|-------|
|       | $\alpha$ | Mn3 | 2.86  | 2.97  | 2.90  |
|       | $\alpha$ | Mn4 | 2.92  | 2.99  | 2.93  |
|       | $\alpha$ | O5  | 0.51  | 0.16  | -0.03 |
|       | $\alpha$ | O10 | 0.36  | 0.11  | 0.02  |
| 12-et | $\alpha$ | Mn1 | 2.95  | 2.33  | 2.04  |
|       | $\alpha$ | Mn2 | 2.94  | 2.93  | 2.93  |
|       | $\alpha$ | Mn3 | 2.90  | 2.84  | 2.86  |
|       | $\alpha$ | Mn4 | 2.94  | 2.91  | 2.92  |
|       | $\beta$  | O5  | -0.53 | -0.21 | -0.05 |
|       | $\beta$  | O10 | -0.41 | -0.10 | -0.02 |
| 14-et | $\alpha$ | Mn1 | 2.98  | 3.37  | 3.90  |
|       | $\alpha$ | Mn2 | 2.94  | 2.96  | 2.98  |
|       | $\alpha$ | Mn3 | 2.89  | 2.90  | 2.89  |
|       | $\alpha$ | Mn4 | 2.86  | 2.98  | 2.94  |
|       | $\alpha$ | O5  | 0.51  | 0.32  | 0.01  |
|       | $\alpha$ | O10 | 0.42  | 0.19  | 0.02  |

**Rea:**

|    |             |             |             |   |             |             |             |
|----|-------------|-------------|-------------|---|-------------|-------------|-------------|
| Ca | -2.74814800 | 0.17542200  | -1.02002700 | H | -3.65635000 | 6.37549700  | -1.32408600 |
| Mn | 0.20493900  | -1.73046100 | -0.47580900 | H | -3.36276300 | 6.12622900  | 0.40573100  |
| Mn | -1.19500700 | -0.88291100 | 1.76340600  | H | -4.98123600 | 6.59015500  | -0.16169500 |
| Mn | 0.04117300  | 1.42297100  | 0.82567900  | O | -0.25120200 | -2.88208900 | -1.96424000 |
| Mn | -0.35296500 | 3.38178200  | -1.17765800 | C | -1.40400900 | -2.93131300 | -2.56310000 |
| O  | -1.48602300 | -1.59792700 | 0.08476200  | O | -2.28061400 | -2.04726800 | -2.51083800 |
| O  | 0.48288800  | -0.59672800 | 0.97114300  | C | -1.60241500 | -4.20024800 | -3.38910000 |
| O  | -1.61940600 | 0.78433300  | 1.32365100  | H | -0.74758000 | -4.27955900 | -4.07778800 |
| O  | -0.59396600 | 1.40255700  | -0.87257800 | H | -1.49868500 | -5.05357200 | -2.70165700 |
| O  | -0.21583400 | 3.14850500  | 0.65739900  | C | -2.92646100 | -4.27246200 | -4.15346200 |
| O  | -4.73534700 | -0.94307100 | -2.06586300 | H | -3.01887700 | -3.39128200 | -4.80373400 |
| H  | -5.10127000 | -1.22743500 | -1.20418200 | H | -3.76081800 | -4.21303700 | -3.43991300 |
| H  | -4.22043800 | -1.70472800 | -2.40660600 | C | -3.05096800 | -5.55275100 | -4.98703100 |
| O  | -1.74578700 | 0.69146600  | -3.24278100 | H | -2.24731500 | -5.62292100 | -5.73343300 |
| H  | -2.07460600 | 0.44899900  | -4.12215500 | H | -2.99290000 | -6.44910700 | -4.35384700 |
| H  | -1.37829400 | 1.64000700  | -3.28054200 | H | -4.00795700 | -5.58504800 | -5.52349100 |
| O  | -0.65923100 | 3.04092900  | -2.99052900 | N | 2.26045900  | -1.91453100 | -0.84161300 |
| H  | -0.73440900 | 3.89298700  | -3.45278800 | C | 2.94880900  | -1.61906500 | -1.99754700 |
| O  | 0.07138800  | 5.11937500  | -1.35135700 | H | 2.42165500  | -1.37608200 | -2.90896700 |
| H  | -0.70006700 | 5.59857600  | -0.99016000 | C | 4.30014600  | -1.66536800 | -1.74947600 |
| O  | -3.62000800 | 2.34235800  | -1.04361600 | N | 4.41032200  | -2.01262400 | -0.40713500 |
| C  | -3.33999800 | 3.54400400  | -0.86208900 | H | 5.26740100  | -1.89788500 | 0.14144900  |
| O  | -2.16780500 | 4.07040800  | -0.91986800 | C | 3.16416200  | -2.13125900 | 0.10257800  |
| C  | -4.47903500 | 4.51321900  | -0.54132500 | H | 2.94636100  | -2.33668600 | 1.14017500  |
| H  | -5.23590100 | 4.37278100  | -1.32625400 | C | 5.47270200  | -1.42369800 | -2.66349000 |
| H  | -4.94213200 | 4.13752100  | 0.38297000  | H | 5.63359700  | -2.29515400 | -3.31615500 |
| C  | -4.09571700 | 5.98559100  | -0.39740800 | H | 5.20854500  | -0.59470800 | -3.33462200 |

|   |             |             |             |   |             |             |             |
|---|-------------|-------------|-------------|---|-------------|-------------|-------------|
| C | 6.82291300  | -1.11647000 | -1.96372100 | H | 0.03344500  | -6.16135600 | 4.11862000  |
| H | 7.24161600  | -2.03069300 | -1.52844900 | H | 0.42830500  | -4.45809700 | 4.44066700  |
| H | 7.53412100  | -0.76221800 | -2.72241600 | H | -1.21213600 | -4.90015900 | 3.95462400  |
| C | 6.69553100  | -0.11579100 | -0.81567500 | O | -4.25479100 | -0.78968300 | 0.65919200  |
| O | 6.63215800  | -0.50028300 | 0.36019600  | C | -4.09051200 | -1.17760200 | 1.83775600  |
| N | 6.59218600  | 1.19259900  | -1.15879400 | O | -2.95669600 | -1.27417800 | 2.44676700  |
| H | 6.60937900  | 1.43618000  | -2.14151700 | C | -5.28677500 | -1.57102300 | 2.68735100  |
| C | 6.22076200  | 2.23003700  | -0.18918100 | H | -5.41378900 | -0.83129700 | 3.48854500  |
| H | 6.82596600  | 2.07231100  | 0.71006000  | H | -5.10879100 | -2.54115500 | 3.16552100  |
| H | 6.50815500  | 3.19517700  | -0.62496000 | H | -6.19590600 | -1.60571300 | 2.08065600  |
| C | 4.72891700  | 2.21613000  | 0.18489900  | O | -0.54279400 | -0.26315600 | 3.51785900  |
| H | 4.49166800  | 1.27233700  | 0.68728200  | C | 0.16602400  | 0.78586400  | 3.66696500  |
| H | 4.55722900  | 3.01502500  | 0.92026800  | O | 0.57313000  | 1.54721100  | 2.73647800  |
| C | 3.79997200  | 2.40945100  | -1.01868100 | C | 0.53786500  | 1.17717100  | 5.08852900  |
| H | 3.96137400  | 1.60379700  | -1.75178200 | H | 1.43356700  | 1.80854600  | 5.03774600  |
| H | 3.99268300  | 3.35796400  | -1.53568100 | H | -0.27828400 | 1.82380100  | 5.45129700  |
| C | 2.31458800  | 2.36970600  | -0.67616400 | C | 0.73127400  | -0.00358900 | 6.04873600  |
| O | 1.95259800  | 1.64444400  | 0.29743200  | H | -1.53926600 | -0.64787600 | 5.67078900  |
| O | 1.56438800  | 3.05544300  | -1.43593900 | H | -0.17783900 | -0.61778400 | 6.04770000  |
| O | 0.50202300  | -3.34055500 | 0.61062400  | C | 1.06054400  | 0.45677100  | 7.47285900  |
| C | -0.01087900 | -3.56253800 | 1.76599500  | H | 1.98238000  | 1.05467100  | 7.49910300  |
| O | -0.68337700 | -2.74325600 | 2.44085400  | H | 1.20012900  | -0.40113500 | 8.14336200  |
| C | 0.23357300  | -4.95748000 | 2.32737400  | H | 0.25261500  | 1.07600900  | 7.88742000  |
| H | 1.29064000  | -5.20074100 | 2.15329100  | O | 0.34671800  | -0.31201100 | -1.73729600 |
| H | -0.33577900 | -5.64940200 | 1.68773500  | H | -0.35667700 | -0.21887800 | -2.42962700 |
| C | -0.15265600 | -5.12904100 | 3.79653600  |   |             |             |             |

**TS:**

|    |             |             |             |   |             |             |             |
|----|-------------|-------------|-------------|---|-------------|-------------|-------------|
| Ca | -2.71248700 | 0.29148100  | -1.03787800 | H | -0.45314500 | 4.02133600  | -3.34189500 |
| Mn | 0.14479700  | -1.75077800 | -0.54443900 | O | 0.39876200  | 5.13314300  | -1.13556500 |
| Mn | -1.25557900 | -0.96120400 | 1.70888900  | H | -0.37850600 | 5.62613000  | -0.80588000 |
| Mn | 0.07263500  | 1.33194800  | 0.91286300  | O | -3.42686000 | 2.51448100  | -0.98325100 |
| Mn | -0.10763000 | 3.41080900  | -1.08046700 | C | -3.09809900 | 3.70804300  | -0.84321100 |
| O  | -1.55760700 | -1.60600100 | 0.02427800  | O | -1.90689900 | 4.18609500  | -0.94370600 |
| O  | 0.43848500  | -0.65585300 | 1.00117100  | C | -4.19325100 | 4.73129800  | -0.53801700 |
| O  | -1.61443400 | 0.75123400  | 1.28374500  | H | -4.94861600 | 4.62311400  | -1.32977700 |
| O  | -0.44843500 | 1.39829900  | -0.87744600 | H | -4.68235400 | 4.38148300  | 0.38275000  |
| O  | -0.13935300 | 3.07463400  | 0.72804200  | C | -3.74349900 | 6.18501700  | -0.39720600 |
| O  | -4.77705900 | -0.61536800 | -2.14546800 | H | -3.27731800 | 6.54996400  | -1.32079200 |
| H  | -5.15273700 | -0.91958900 | -1.29391400 | H | -3.01326400 | 6.29579400  | 0.41333500  |
| H  | -4.31741600 | -1.39004600 | -2.53038700 | H | -4.60218500 | 6.83100200  | -0.17247500 |
| O  | -1.66048400 | 0.95470500  | -3.25107700 | O | -0.33881800 | -2.69736100 | -2.16888800 |
| H  | -1.95960300 | 0.74787400  | -4.15005900 | C | -1.50724900 | -2.69950800 | -2.73911900 |
| H  | -1.22534300 | 1.88210100  | -3.24803600 | O | -2.35359200 | -1.78959700 | -2.64087400 |
| O  | -0.32183100 | 3.14823900  | -2.93397000 | C | -1.76740500 | -3.93658100 | -3.59392400 |

|   |             |             |             |   |             |             |             |
|---|-------------|-------------|-------------|---|-------------|-------------|-------------|
| H | -0.93156000 | -4.02607200 | -4.30440300 | C | 2.47758700  | 2.28636300  | -0.42771400 |
| H | -1.67539900 | -4.81003000 | -2.93041900 | O | 2.03501300  | 1.53429500  | 0.48613700  |
| C | -3.11055300 | -3.94665900 | -4.32762800 | O | 1.79571800  | 3.00562500  | -1.22510300 |
| H | -3.18979100 | -3.04650300 | -4.95333100 | O | 0.42960000  | -3.45880800 | 0.56443100  |
| H | -3.92523800 | -3.87954500 | -3.59232100 | C | -0.11907700 | -3.66434300 | 1.69763200  |
| C | -3.29637600 | -5.20031000 | -5.18979800 | O | -0.79630100 | -2.82278800 | 2.35510100  |
| H | -2.51323500 | -5.27689200 | -5.95709000 | C | 0.05765400  | -5.05965900 | 2.28814700  |
| H | -3.25268200 | -6.11399500 | -4.58076100 | H | 1.10793400  | -5.34639700 | 2.14050700  |
| H | -4.26627800 | -5.18808500 | -5.70339200 | H | -0.52489200 | -5.73895200 | 1.64655100  |
| N | 2.16973700  | -1.92779100 | -0.99582000 | C | -0.36502100 | -5.19872000 | 3.75081700  |
| C | 2.86196300  | -1.48389500 | -2.10336000 | H | -0.22585300 | -6.23320900 | 4.09001200  |
| H | 2.34390700  | -1.07292000 | -2.95816300 | H | 0.22784100  | -4.54216700 | 4.39910400  |
| C | 4.21130000  | -1.64174600 | -1.89416800 | H | -1.41770300 | -4.92662400 | 3.88361400  |
| N | 4.31653800  | -2.20946300 | -0.62944000 | O | -4.29741000 | -0.67327300 | 0.56643000  |
| H | 5.18598200  | -2.23313300 | -0.08829200 | C | -4.16887500 | -1.12854500 | 1.72662500  |
| C | 3.07321000  | -2.34506900 | -0.11937000 | O | -3.05333600 | -1.29401800 | 2.35075900  |
| H | 2.85241800  | -2.72228000 | 0.86783300  | C | -5.39544200 | -1.53271100 | 2.52745500  |
| C | 5.38592100  | -1.32012800 | -2.78106900 | H | -5.47415300 | -0.89167500 | 3.41469700  |
| H | 5.48591000  | -2.08130400 | -3.56956700 | H | -5.28703100 | -2.56479800 | 2.88193600  |
| H | 5.16443000  | -0.37886000 | -3.30287400 | H | -6.30172200 | -1.43360600 | 1.92364100  |
| C | 6.76092200  | -1.20927900 | -2.06994200 | O | -0.66849200 | -0.36570700 | 3.51643800  |
| H | 7.12766800  | -2.20438500 | -1.79452000 | C | 0.05021800  | 0.66139400  | 3.71384800  |
| H | 7.48331100  | -0.78055000 | -2.77786200 | O | 0.50273700  | 1.44435300  | 2.81439100  |
| C | 6.70349500  | -0.39788300 | -0.77660600 | C | 0.39179900  | 1.02534800  | 5.15018600  |
| O | 6.61327500  | -0.95930600 | 0.32388300  | H | 1.36121200  | 1.54013600  | 5.14151100  |
| N | 6.68681900  | 0.95261100  | -0.90747000 | H | -0.35071000 | 1.77994000  | 5.45858300  |
| H | 6.71826600  | 1.34535800  | -1.84039800 | C | 0.38507500  | -0.15159500 | 6.13247300  |
| C | 6.34254000  | 1.84063000  | 0.20951200  | H | 1.12215100  | -0.89965400 | 5.80517900  |
| H | 6.89612200  | 1.49240700  | 1.08772100  | H | -0.59255700 | -0.64787200 | 6.09100800  |
| H | 6.71024900  | 2.84204000  | -0.04745200 | C | 0.69633200  | 0.29084700  | 7.56639600  |
| C | 4.83613400  | 1.86562300  | 0.52158800  | H | 1.68407500  | 0.76814800  | 7.63466300  |
| H | 4.51832900  | 0.86605700  | 0.83766800  | H | 0.69137500  | -0.56498000 | 8.25379800  |
| H | 4.67491500  | 2.53049900  | 1.38169600  | H | -0.04650800 | 1.01477100  | 7.93009400  |
| C | 3.98469300  | 2.33162900  | -0.66258400 | O | 0.21273300  | -0.04308300 | -1.64107200 |
| H | 4.16887600  | 1.69203600  | -1.53976600 | H | -0.33815500 | 0.05190300  | -2.47252500 |
| H | 4.23419200  | 3.35667900  | -0.96689700 |   |             |             |             |

**Pro:**

|    |             |             |             |   |             |             |             |
|----|-------------|-------------|-------------|---|-------------|-------------|-------------|
| Ca | -2.72016100 | 0.26508700  | -1.10634800 | O | -1.60297700 | 0.70514800  | 1.25664200  |
| Mn | 0.16157300  | -1.79710700 | -0.55581800 | O | -0.39256800 | 1.30190300  | -0.93854100 |
| Mn | -1.29693700 | -1.04717100 | 1.65064900  | O | -0.14869400 | 2.96456700  | 0.77118800  |
| Mn | 0.09475100  | 1.23744500  | 0.97886300  | O | -4.78816100 | -0.58013400 | -2.25186600 |
| Mn | -0.08559500 | 3.39873000  | -0.99613000 | H | -5.16968000 | -0.91235200 | -1.41343900 |
| O  | -1.57527200 | -1.60839500 | -0.04138700 | H | -4.32684400 | -1.34027000 | -2.66199200 |
| O  | 0.42586500  | -0.71860600 | 1.01193700  | O | -1.67884600 | 1.12663200  | -3.28492800 |



|   |             |             |             |   |             |             |             |
|---|-------------|-------------|-------------|---|-------------|-------------|-------------|
| H | -1.92551100 | 0.90783900  | -4.19696000 | O | 6.63555800  | -0.88520700 | 0.46889100  |
| H | -1.28472300 | 2.06881200  | -3.25921900 | N | 6.72385600  | 0.96974800  | -0.84206000 |
| O | -0.29084900 | 3.25349800  | -2.86081800 | H | 6.77138900  | 1.32568900  | -1.78893300 |
| H | -0.36047600 | 4.15723800  | -3.21340700 | C | 6.37522600  | 1.90144900  | 0.23769500  |
| O | 0.41423800  | 5.11897800  | -0.96175400 | H | 6.94499800  | 1.60597100  | 1.12502600  |
| H | -0.36699200 | 5.59027300  | -0.60942100 | H | 6.72041600  | 2.89629600  | -0.07045000 |
| O | -3.38708100 | 2.49444300  | -0.95866200 | C | 4.87230900  | 1.91451100  | 0.56797700  |
| C | -3.07507100 | 3.68395500  | -0.76187300 | H | 4.57656200  | 0.92741800  | 0.93908100  |
| O | -1.88772500 | 4.17624500  | -0.83423000 | H | 4.71071600  | 2.62136700  | 1.39409100  |
| C | -4.18259900 | 4.68018700  | -0.41705600 | C | 3.99920000  | 2.30322900  | -0.62843700 |
| H | -4.93456200 | 4.59693400  | -1.21500000 | H | 4.18121800  | 1.61495700  | -1.46868900 |
| H | -4.66986400 | 4.28575600  | 0.48650900  | H | 4.23110300  | 3.31236200  | -0.99244400 |
| C | -3.75031600 | 6.13174700  | -0.21311900 | C | 2.49657200  | 2.24771500  | -0.37155800 |
| H | -3.28534900 | 6.54094300  | -1.11860500 | O | 2.06431100  | 1.46491100  | 0.51973400  |
| H | -3.02433400 | 6.21665800  | 0.60435900  | O | 1.80532500  | 2.99145000  | -1.14173200 |
| H | -4.61724400 | 6.75759800  | 0.03542500  | O | 0.41488400  | -3.61085900 | 0.59973800  |
| O | -0.28763100 | -2.53725800 | -2.30445900 | C | -0.19573000 | -3.77003700 | 1.69497300  |
| C | -1.43181400 | -2.52986700 | -2.91155200 | O | -0.88670200 | -2.88303200 | 2.30025200  |
| O | -2.31791000 | -1.66182700 | -2.76051000 | C | -0.12367100 | -5.14801300 | 2.34849500  |
| C | -1.62685500 | -3.68654300 | -3.88778800 | H | 0.89502400  | -5.52807000 | 2.19446500  |
| H | -0.77260500 | -3.67623700 | -4.58218100 | H | -0.77760400 | -5.80220700 | 1.75021700  |
| H | -1.51386100 | -4.61605100 | -3.30904100 | C | -0.52719500 | -5.19320000 | 3.82301800  |
| C | -2.95108700 | -3.67894000 | -4.65487200 | H | -0.47030400 | -6.22115300 | 4.20404700  |
| H | -3.05440000 | -2.72611000 | -5.19317100 | H | 0.13351000  | -4.56562800 | 4.43413600  |
| H | -3.78444400 | -3.71559400 | -3.93848200 | H | -1.54924200 | -4.82483100 | 3.96182300  |
| C | -3.06558600 | -4.84920200 | -5.63822800 | O | -4.33055300 | -0.69674000 | 0.46402700  |
| H | -2.26265000 | -4.82033700 | -6.38825900 | C | -4.21845900 | -1.16401000 | 1.62160100  |
| H | -2.99739600 | -5.81521800 | -5.11877700 | O | -3.11389700 | -1.33077300 | 2.26304800  |
| H | -4.02325800 | -4.82570200 | -6.17403500 | C | -5.45567900 | -1.59497900 | 2.39194600  |
| N | 2.19004800  | -1.92279900 | -0.96190000 | H | -5.48980200 | -1.07173500 | 3.35512500  |
| C | 2.91688200  | -1.56185000 | -2.07647700 | H | -5.39697900 | -2.66914400 | 2.60898000  |
| H | 2.42561100  | -1.25647600 | -2.99012600 | H | -6.36224600 | -1.38033100 | 1.81939000  |
| C | 4.26071400  | -1.65933900 | -1.80001800 | O | -0.74478800 | -0.44776200 | 3.51188500  |
| N | 4.32532300  | -2.11123000 | -0.48708400 | C | -0.00395600 | 0.54666300  | 3.72989800  |
| H | 5.17693200  | -2.09936100 | 0.08252100  | O | 0.49311800  | 1.33014400  | 2.83887100  |
| C | 3.06631100  | -2.23702700 | -0.01680800 | C | 0.34691700  | 0.90621000  | 5.16472000  |
| H | 2.81187600  | -2.53276800 | 0.99027100  | H | 1.40351800  | 1.20753700  | 5.18020300  |
| C | 5.46466700  | -1.36597400 | -2.65838000 | H | -0.22486200 | 1.81800300  | 5.40195200  |
| H | 5.58445900  | -2.14837400 | -3.42272300 | C | 0.06000300  | -0.19158400 | 6.19363400  |
| H | 5.26668800  | -0.43768800 | -3.21260800 | H | 0.63133800  | -1.09304100 | 5.93001900  |
| C | 6.81801200  | -1.24220400 | -1.91010200 | H | -0.99830100 | -0.47544400 | 6.13200600  |
| H | 7.16216700  | -2.22893600 | -1.58088500 | C | 0.40876700  | 0.24964500  | 7.61939200  |
| H | 7.56689200  | -0.85399500 | -2.61396500 | H | 1.47238500  | 0.51166900  | 7.71056500  |
| C | 6.74069900  | -0.37376200 | -0.65459300 | H | 0.19947500  | -0.54974400 | 8.34185900  |

|   |             |            |             |   |             |            |             |
|---|-------------|------------|-------------|---|-------------|------------|-------------|
| H | -0.17564000 | 1.13101200 | 7.91907600  | H | -0.17580400 | 0.48723200 | -2.61040700 |
| O | 0.39322200  | 0.41309400 | -1.79078200 |   |             |            |             |

**Table S4** Reaction parameters for the closed-cubane Wx (hydroxyl)-O5 (oxo) nucleophilic attack:

| Spin state | Spin topology<br>(Mn1~Mn4-O5/O10) | Gibbs Free energy (a.u.) |            |            |
|------------|-----------------------------------|--------------------------|------------|------------|
|            |                                   | Rea                      | TS         | Pro        |
| doublet    | $\alpha\alpha\beta\alpha$         | -3366.2116               | -3366.1901 | -3366.2043 |
|            | $\alpha\beta\alpha\beta$          | -3366.2011               | -3366.1891 | -3366.2048 |
|            | $\alpha\beta\beta\alpha$          | -3366.2144               | -3366.1922 | -3366.2126 |
|            | $\beta\alpha\alpha\beta$          | -3366.2028               | -3366.1730 | -3366.1802 |
|            | $\beta\alpha\beta\alpha$          | -3366.2051               | -3366.1736 | -3366.1828 |
|            | $\beta\beta\alpha\alpha$          | -3366.2045               | -3366.1720 | -3366.1790 |
| sextet     | $\alpha\alpha\alpha\beta\beta$    | -3366.2088               | -3366.1783 | -3366.1854 |
|            | $\alpha\alpha\beta\alpha\beta$    | -3366.2113               | -3366.1802 | -3366.1803 |
|            | $\alpha\beta\alpha\alpha\beta$    | -3366.2063               | -3366.1690 | -3366.1701 |
|            | $\beta\alpha\alpha\alpha\beta$    | -3366.2144               | -3366.1934 | -3366.2065 |
| octet      | $\alpha\alpha\alpha\beta\alpha$   | -3366.2050               | -3366.1947 | -3366.2083 |
|            | $\alpha\alpha\beta\alpha\alpha$   | -3366.2154               | -3366.1926 | -3366.2114 |
|            | $\alpha\beta\alpha\alpha\alpha$   | -3366.2129               | -3366.1899 | -3366.2077 |
|            | $\beta\alpha\alpha\alpha\alpha$   | -3366.2063               | -3366.1750 | -3366.1811 |
| 12-et      | $\alpha\alpha\alpha\alpha\beta$   | -3366.2057               | -3366.1764 | -3366.1719 |
| 14-et      | $\alpha\alpha\alpha\alpha\alpha$  | -3366.2154               | -3366.1911 | -3366.2077 |

| Spin state | Spin topology<br>(Mn1~Mn4-O5/O10) | Relative Gibbs Free energy (kcal/mol) |                      |                  |                  |
|------------|-----------------------------------|---------------------------------------|----------------------|------------------|------------------|
|            |                                   | $\Delta G^\ddagger$ (Rea-TS)          | $\Delta G$ (Rea-Pro) | $\Delta G$ (Rea) | $\Delta G$ (Pro) |
| doublet    | $\alpha\alpha\beta\alpha$         | 13.5                                  | 4.6                  | 2.4              | 5.2              |
|            | $\alpha\beta\alpha\beta$          | 7.5                                   | -2.3                 | 9.0              | 4.9              |
|            | $\alpha\beta\beta\alpha$          | 13.9                                  | 1.1                  | 0.6              | 0.0              |
|            | $\beta\alpha\alpha\beta$          | 18.7                                  | 14.2                 | 7.9              | 20.3             |
|            | $\beta\alpha\beta\alpha$          | 19.8                                  | 14.0                 | 6.5              | 18.7             |
|            | $\beta\beta\alpha\alpha$          | 20.4                                  | 16.0                 | 6.8              | 21.1             |
| sextet     | $\alpha\alpha\alpha\beta\beta$    | 19.1                                  | 14.7                 | 4.1              | 17.1             |
|            | $\alpha\alpha\beta\alpha\beta$    | 19.5                                  | 19.5                 | 2.6              | 20.3             |
|            | $\alpha\beta\alpha\alpha\beta$    | 23.4                                  | 22.7                 | 5.7              | 27.4             |
|            | $\beta\alpha\alpha\alpha\beta$    | 13.2                                  | 5.0                  | 0.6              | 3.8              |
| octet      | $\alpha\alpha\alpha\beta\alpha$   | 6.5                                   | -2.1                 | 6.5              | 2.7              |
|            | $\alpha\alpha\beta\alpha\alpha$   | 14.3                                  | 2.5                  | 0.0              | 0.8              |
|            | $\alpha\beta\alpha\alpha\alpha$   | 14.4                                  | 3.3                  | 1.6              | 3.1              |
|            | $\beta\alpha\alpha\alpha\alpha$   | 19.6                                  | 15.8                 | 5.7              | 19.8             |
| 12-et      | $\alpha\alpha\alpha\alpha\beta$   | 18.4                                  | 21.2                 | 6.1              | 25.5             |
| 14-et      | $\alpha\alpha\alpha\alpha\alpha$  | 15.2                                  | 4.8                  | 0.0              | 3.1              |

| Spin state | Spin | Mulliken spin density |
|------------|------|-----------------------|
|------------|------|-----------------------|

|          |          | topology<br>(Mn1~Mn4-O5/O10) | Rea   | TS    | Pro   |
|----------|----------|------------------------------|-------|-------|-------|
| doublet  | $\alpha$ | Mn1                          | 2.93  | 3.48  | 3.88  |
|          | $\alpha$ | Mn2                          | 2.94  | 2.95  | 2.97  |
|          | $\beta$  | Mn3                          | -2.89 | -2.78 | -2.84 |
|          | $\beta$  | Mn4                          | -2.91 | -2.90 | -2.87 |
|          | $\alpha$ | O5                           | 0.61  | -0.04 | -0.06 |
|          | $\alpha$ | O10                          | 0.46  | 0.39  | 0.02  |
|          | $\alpha$ | Mn1                          | 2.94  | 3.41  | 3.88  |
|          | $\beta$  | Mn2                          | -2.95 | -2.93 | 2.92  |
|          | $\alpha$ | Mn3                          | 2.73  | 2.77  | 2.79  |
|          | $\beta$  | Mn4                          | -2.84 | -2.84 | -2.83 |
|          | $\alpha$ | O5                           | 0.33  | 0.04  | -0.04 |
|          | $\alpha$ | O10                          | 0.58  | 0.43  | 0.02  |
|          | $\alpha$ | Mn1                          | 2.92  | 3.45  | 3.87  |
|          | $\beta$  | Mn2                          | -2.93 | -2.92 | -2.91 |
|          | $\beta$  | Mn3                          | -2.83 | -2.77 | -2.80 |
|          | $\alpha$ | Mn4                          | 2.74  | 2.81  | -2.81 |
|          | $\alpha$ | O5                           | 0.57  | 0.07  | 0.05  |
|          | $\alpha$ | O10                          | 0.48  | 0.37  | -0.01 |
|          | $\beta$  | Mn1                          | -2.86 | -2.35 | -2.00 |
|          | $\alpha$ | Mn2                          | 2.94  | 2.92  | 2.89  |
|          | $\alpha$ | Mn3                          | 2.79  | 2.82  | 2.79  |
|          | $\beta$  | Mn4                          | -2.83 | -2.81 | -2.81 |
|          | $\alpha$ | O5                           | 0.44  | 0.04  | -0.02 |
|          | $\alpha$ | O10                          | 0.48  | 0.28  | 0.02  |
|          | $\beta$  | Mn1                          | -2.92 | -2.35 | -2.01 |
|          | $\alpha$ | Mn2                          | 2.93  | 2.92  | 2.91  |
|          | $\beta$  | Mn3                          | -2.82 | -2.74 | -2.75 |
|          | $\alpha$ | Mn4                          | 2.74  | 2.82  | 2.81  |
| $\alpha$ | O5       | 0.53                         | 0.06  | 0.05  |       |
| $\alpha$ | O10      | 0.52                         | 0.25  | 0.00  |       |
| $\beta$  | Mn1      | -2.92                        | -2.35 | -2.02 |       |
| $\beta$  | Mn2      | -2.94                        | -2.92 | -2.91 |       |
| $\alpha$ | Mn3      | 2.87                         | 2.82  | 2.80  |       |
| $\alpha$ | Mn4      | 2.83                         | 2.88  | 2.87  |       |
| $\alpha$ | O5       | 0.55                         | 0.08  | 0.07  |       |
| $\alpha$ | O10      | 0.51                         | 0.24  | 0.00  |       |
| sextet   | $\alpha$ | Mn1                          | 2.92  | 2.36  | 2.03  |
|          | $\alpha$ | Mn2                          | 2.93  | 2.90  | 2.90  |
|          | $\alpha$ | Mn3                          | 2.84  | 2.77  | 2.79  |
|          | $\beta$  | Mn4                          | -2.74 | -2.82 | -2.81 |
|          | $\beta$  | O5                           | -0.53 | -0.06 | -0.05 |
|          | $\beta$  | O10                          | -0.52 | -0.23 | 0.00  |

|       |          |     |       |       |       |
|-------|----------|-----|-------|-------|-------|
|       | $\alpha$ | Mn1 | 2.90  | 2.25  | 2.04  |
|       | $\alpha$ | Mn2 | 2.96  | 2.95  | 2.95  |
|       | $\beta$  | Mn3 | -2.70 | -2.74 | -2.76 |
|       | $\alpha$ | Mn4 | 2.85  | 2.83  | 2.83  |
|       | $\beta$  | O5  | -0.42 | -0.03 | 0.02  |
|       |          | O10 | -0.48 | -0.19 | -0.04 |
|       | $\alpha$ | Mn1 | 2.89  | 2.17  | 2.00  |
|       | $\beta$  | Mn2 | -2.96 | -2.93 | -2.93 |
|       | $\alpha$ | Mn3 | 2.79  | 2.82  | 2.83  |
|       | $\alpha$ | Mn4 | 2.89  | 2.85  | 2.84  |
|       | $\beta$  | O5  | -0.50 | -0.08 | -0.04 |
|       |          | O10 | -0.45 | -0.13 | -0.02 |
|       | $\beta$  | Mn1 | -2.92 | -3.42 | -3.88 |
|       | $\alpha$ | Mn2 | 2.93  | 2.93  | 2.92  |
|       | $\alpha$ | Mn3 | 2.91  | 2.81  | 2.87  |
|       | $\alpha$ | Mn4 | 2.91  | 2.90  | 2.87  |
|       | $\beta$  | O5  | -0.61 | 0.04  | 0.06  |
|       |          | O10 | -0.47 | -0.41 | -0.02 |
|       | $\alpha$ | Mn1 | 2.95  | 3.47  | 3.88  |
|       | $\alpha$ | Mn2 | 2.92  | 2.94  | 2.96  |
|       | $\alpha$ | Mn3 | 2.76  | 2.82  | 2.82  |
|       | $\beta$  | Mn4 | -2.83 | -2.84 | -2.82 |
|       | $\alpha$ | O5  | 0.34  | 0.04  | -0.03 |
|       |          | O10 | 0.59  | 0.39  | 0.04  |
|       | $\alpha$ | Mn1 | 2.93  | 3.49  | 3.88  |
| octet | $\alpha$ | Mn2 | 2.94  | 2.96  | 2.97  |
|       | $\beta$  | Mn3 | -2.80 | -2.73 | -2.77 |
|       | $\alpha$ | Mn4 | 2.73  | 2.81  | 2.81  |
|       | $\alpha$ | O5  | 0.57  | 0.07  | 0.05  |
|       |          | O10 | 0.48  | 0.37  | 0.00  |
|       | $\alpha$ | Mn1 | 2.93  | 3.43  | 2.88  |
|       | $\beta$  | Mn2 | -2.93 | -2.93 | -2.91 |
|       | $\alpha$ | Mn3 | 2.89  | 2.85  | 2.87  |
|       | $\alpha$ | Mn4 | 2.83  | 2.87  | 2.87  |
|       | $\alpha$ | O5  | 0.58  | 0.11  | 0.07  |
|       |          | O10 | 0.47  | 0.40  | 0.00  |
|       | $\beta$  | Mn1 | -2.91 | -2.34 | -2.01 |
|       | $\alpha$ | Mn2 | 2.93  | 2.91  | 2.89  |
|       | $\alpha$ | Mn3 | 2.90  | 2.86  | 2.84  |
|       | $\alpha$ | Mn4 | 2.83  | 2.87  | 2.87  |
|       | $\alpha$ | O5  | 0.55  | 0.08  | 0.07  |
|       |          | O10 | 0.51  | 0.25  | 0.00  |
| 12-et | $\alpha$ | Mn1 | 2.92  | 2.33  | 2.04  |
|       | $\alpha$ | Mn2 | 2.93  | 2.90  | 2.92  |

|       |          |     |       |       |       |
|-------|----------|-----|-------|-------|-------|
|       | $\alpha$ | Mn3 | 2.82  | 2.81  | 2.88  |
|       | $\alpha$ | Mn4 | 2.89  | 2.86  | 2.83  |
|       | $\beta$  | O5  | -0.37 | -0.09 | -0.04 |
|       |          | O10 | -0.55 | -0.22 | -0.02 |
| 14-et | $\alpha$ | Mn1 | 2.93  | 3.48  | 3.89  |
|       | $\alpha$ | Mn2 | 2.93  | 2.95  | 2.97  |
|       | $\alpha$ | Mn3 | 2.92  | 2.90  | 2.91  |
|       | $\alpha$ | Mn4 | 2.83  | 2.87  | 2.87  |
|       | $\alpha$ | O5  | 0.59  | 0.11  | 0.06  |
|       |          | O10 | 0.47  | 0.39  | 0.00  |

**Rea:**

|    |             |             |             |   |             |             |             |
|----|-------------|-------------|-------------|---|-------------|-------------|-------------|
| Ca | -2.49040900 | 0.06765000  | -1.17200600 | C | -1.01460800 | -3.70142800 | -3.86309800 |
| Mn | 0.21164200  | -1.71337100 | -0.34619200 | H | -0.12120900 | -3.48457100 | -4.46843600 |
| Mn | -1.37283700 | -1.21467600 | 1.79520500  | H | -0.80249500 | -4.66112800 | -3.36704100 |
| Mn | 0.06159600  | 0.89923900  | 0.78104100  | C | -2.25945300 | -3.80316400 | -4.74760300 |
| Mn | 0.00872700  | 3.60627300  | -1.04415700 | H | -2.46092400 | -2.82252200 | -5.20023600 |
| O  | -1.52164600 | -1.88214100 | 0.11477400  | H | -3.13080900 | -4.03397200 | -4.11851500 |
| O  | 0.44769100  | -0.92229900 | 1.32392900  | C | -2.11343800 | -4.86672400 | -5.84160300 |
| O  | -1.65511600 | 0.44234500  | 1.14915200  | H | -1.26751400 | -4.64230500 | -6.50663100 |
| O  | 0.01384700  | 0.02611100  | -0.87401400 | H | -3.01737100 | -4.92478500 | -6.46168000 |
| O  | -0.42791900 | 2.51117600  | 0.23392300  | H | -1.93980300 | -5.86305600 | -5.41105300 |
| O  | -4.59460100 | -0.71353900 | -2.33619800 | N | 2.26196600  | -1.76458300 | -0.65470900 |
| H  | -4.98783100 | -1.07066600 | -1.51434500 | C | 3.00606200  | -1.43173400 | -1.76436800 |
| H  | -4.13139100 | -1.46235300 | -2.76382400 | H | 2.52583600  | -1.15254600 | -2.69240200 |
| O  | -2.25643900 | 0.94981100  | -3.52913800 | C | 4.34571300  | -1.53486200 | -1.46303600 |
| H  | -3.05507300 | 1.49550200  | -3.63121300 | N | 4.38468100  | -1.96126900 | -0.14078800 |
| H  | -1.52120400 | 1.60576200  | -3.41735600 | H | 5.22750400  | -1.95571300 | 0.44163400  |
| O  | 0.49130900  | 4.56066000  | -2.71783600 | C | 3.11677900  | -2.06587500 | 0.31131800  |
| H  | -0.38382200 | 4.90269800  | -3.00042800 | H | 2.84488100  | -2.32966300 | 1.32250300  |
| O  | 0.44751400  | 4.96201500  | 0.04037700  | C | 5.56958200  | -1.26658400 | -2.30261900 |
| H  | 0.14786100  | 4.70529500  | 0.93412700  | H | 5.69658000  | -2.06152600 | -3.05256800 |
| O  | -3.04127300 | 2.41335100  | -1.19765100 | H | 5.39185900  | -0.34554200 | -2.87556600 |
| C  | -2.90117900 | 3.64632400  | -1.23412300 | C | 6.91129300  | -1.14333900 | -1.53076700 |
| O  | -1.77456400 | 4.29304900  | -1.29887500 | H | 7.24917800  | -2.12979400 | -1.19471300 |
| C  | -4.11629700 | 4.57284600  | -1.20075900 | H | 7.67214800  | -0.75577200 | -2.22202900 |
| H  | -4.09075000 | 5.08089400  | -0.22463900 | C | 6.81141500  | -0.27432400 | -0.27729500 |
| H  | -3.95925800 | 5.36498900  | -1.94532400 | O | 6.70036400  | -0.78563500 | 0.84564000  |
| C  | -5.45239400 | 3.85979000  | -1.40638100 | N | 6.77108500  | 1.06922900  | -0.46471100 |
| H  | -5.60918400 | 3.09030200  | -0.64223800 | H | 6.82242600  | 1.42543700  | -1.41145200 |
| H  | -5.49567800 | 3.36486000  | -2.38505300 | C | 6.34200000  | 1.98354600  | 0.60099500  |
| H  | -6.28137800 | 4.57678200  | -1.35222100 | H | 6.86952300  | 1.69409700  | 1.51553400  |
| O  | -0.00097400 | -2.53459900 | -2.06712300 | H | 6.67635800  | 2.99004100  | 0.32027800  |
| C  | -1.09120600 | -2.63906500 | -2.77217800 | C | 4.82139600  | 1.95190300  | 0.84294000  |
| O  | -2.11381300 | -1.95020600 | -2.61295100 | H | 4.53151100  | 0.95340500  | 1.18742600  |

|   |             |             |             |   |             |             |             |
|---|-------------|-------------|-------------|---|-------------|-------------|-------------|
| H | 4.58908600  | 2.64698800  | 1.66212000  | O | -3.18547700 | -1.52864700 | 2.26365500  |
| C | 4.01886500  | 2.32839100  | -0.40508100 | C | -5.53069900 | -1.77250500 | 2.18824300  |
| H | 4.29245400  | 1.66357700  | -1.23960800 | H | -5.62502700 | -1.29526300 | 3.17087600  |
| H | 4.23904500  | 3.35184400  | -0.73410900 | H | -5.50692000 | -2.85705000 | 2.35534100  |
| C | 2.50113100  | 2.21385800  | -0.27589700 | O | -0.92412400 | -0.39820300 | 3.55460500  |
| O | 2.02477200  | 1.40549400  | 0.56711200  | C | -0.24523800 | 0.67634000  | 3.66923900  |
| O | 1.86068100  | 2.94721400  | -1.10252900 | O | 0.25822000  | 1.36478000  | 2.72351000  |
| O | 0.50001400  | -3.50805900 | 0.61159600  | C | -0.01142500 | 1.17660500  | 5.08660200  |
| C | -0.07887300 | -3.80801500 | 1.70813500  | H | 0.65238500  | 0.45085500  | 5.58195000  |
| O | -0.82383500 | -3.05042500 | 2.40740600  | H | 0.52156800  | 2.13292500  | 5.03201400  |
| C | 0.13993600  | -5.23143300 | 2.21032500  | C | -1.31352800 | 1.31042500  | 5.89566700  |
| H | 1.18103300  | -5.50172600 | 1.99018000  | H | -1.82739300 | 0.34081400  | 5.89926100  |
| H | -0.47728700 | -5.87821900 | 1.56684500  | H | -1.98316900 | 2.01859900  | 5.38512300  |
| H | -6.38862400 | -1.51322300 | 1.56194000  | C | -1.05874200 | 1.78283900  | 7.33062800  |
| C | -0.20510900 | -5.45404200 | 3.68357600  | H | -0.41609600 | 1.07570200  | 7.87385700  |
| H | -0.04111600 | -6.50389400 | 3.95809000  | H | -1.99969600 | 1.87481700  | 7.88844600  |
| H | 0.41733200  | -4.82897500 | 4.33590800  | H | -0.56301200 | 2.76347400  | 7.34820000  |
| H | -1.25118600 | -5.19987100 | 3.88492900  | O | -0.23932300 | 2.53273600  | -2.69555300 |
| O | -4.24085700 | -0.84667100 | 0.37859900  | H | 0.64955200  | 2.15468500  | -2.84722200 |
| C | -4.23575500 | -1.33477800 | 1.52683900  |   |             |             |             |

**TS:**

|    |             |             |             |   |             |             |             |
|----|-------------|-------------|-------------|---|-------------|-------------|-------------|
| Ca | 2.64691700  | -0.17735700 | -1.09125600 | C | 3.65507000  | -4.81336000 | -1.46814700 |
| Mn | -0.07457300 | 1.74559600  | -0.33333600 | H | 3.46101600  | -5.42221100 | -0.57172400 |
| Mn | 1.39069900  | 0.96597400  | 1.83035200  | H | 3.46177900  | -5.47997200 | -2.31934100 |
| Mn | -0.11649500 | -1.09590300 | 0.79211800  | C | 5.09183900  | -4.29201700 | -1.46998100 |
| Mn | -0.34654300 | -3.43180500 | -1.35729900 | H | 5.27884700  | -3.65194200 | -0.60048600 |
| O  | 1.64732800  | 1.68251900  | 0.18786200  | H | 5.30072200  | -3.69623700 | -2.36781200 |
| O  | -0.39584900 | 0.79603500  | 1.25114200  | H | 5.80247700  | -5.12782800 | -1.44477400 |
| O  | 1.61465600  | -0.69989700 | 1.16180600  | O | 0.30791100  | 2.55606200  | -2.04036700 |
| O  | 0.07351900  | -0.26415500 | -0.95355600 | C | 1.45300100  | 2.65810000  | -2.65340200 |
| O  | 0.13090600  | -2.72313400 | 0.25005100  | O | 2.42494000  | 1.90330300  | -2.47470000 |
| O  | 4.82893800  | 0.51487400  | -2.13318800 | C | 1.51392000  | 3.80023700  | -3.66097200 |
| H  | 5.21465200  | 0.83482500  | -1.29347000 | H | 0.66296400  | 3.67532900  | -4.34796200 |
| H  | 4.43925200  | 1.29755400  | -2.57257000 | H | 1.30591500  | 4.73007500  | -3.10930200 |
| O  | 2.33058700  | -0.88716300 | -3.53434900 | C | 2.82907100  | 3.90352200  | -4.43683400 |
| H  | 2.86425600  | -1.69863300 | -3.58349300 | H | 3.02114700  | 2.95049300  | -4.94872500 |
| H  | 1.41088300  | -1.21069700 | -3.39977000 | H | 3.65672100  | 4.04119600  | -3.72658900 |
| O  | -0.81566900 | -3.81362100 | -3.08114100 | C | 2.82045800  | 5.05207600  | -5.45179100 |
| H  | -0.11347200 | -4.40143400 | -3.41908900 | H | 2.02111500  | 4.92235600  | -6.19499700 |
| O  | -0.84834100 | -4.97812900 | -0.61745400 | H | 3.77289600  | 5.10903900  | -5.99450500 |
| H  | -0.56467200 | -4.89710200 | 0.31578500  | H | 2.65904400  | 6.02111700  | -4.95874300 |
| O  | 2.89889900  | -2.53261200 | -1.26375000 | N | -2.09515400 | 1.90245700  | -0.77046600 |
| C  | 2.58993700  | -3.71853900 | -1.47723200 | C | -2.81822100 | 1.48021600  | -1.86570300 |
| O  | 1.40109900  | -4.16289000 | -1.73490700 | H | -2.32598000 | 1.06978000  | -2.73721900 |

|   |             |             |             |   |             |             |             |
|---|-------------|-------------|-------------|---|-------------|-------------|-------------|
| C | -4.15930100 | 1.69665300  | -1.64095200 | C | 0.15398600  | 5.05052300  | 2.53561100  |
| N | -4.22087800 | 2.28560600  | -0.38466200 | H | -0.86372500 | 5.41093300  | 2.33531200  |
| H | -5.08628100 | 2.40169700  | 0.15317400  | H | 0.82100800  | 5.71168900  | 1.96009800  |
| C | -2.96831500 | 2.37210400  | 0.10994800  | H | 6.43599100  | 1.01163200  | 1.91996700  |
| H | -2.71777100 | 2.75853800  | 1.08647700  | C | 0.49332400  | 5.11029900  | 4.02561000  |
| C | -5.36514500 | 1.39362900  | -2.49546200 | H | 0.39693800  | 6.13861800  | 4.39686600  |
| H | -5.40226700 | 2.08264000  | -3.35225400 | H | -0.17862300 | 4.47087400  | 4.61151100  |
| H | -5.23129600 | 0.39167700  | -2.92682400 | H | 1.51695400  | 4.76709900  | 4.20952000  |
| C | -6.74417600 | 1.46834700  | -1.78459800 | O | 4.34053900  | 0.53092000  | 0.56785300  |
| H | -7.01765000 | 2.51172600  | -1.59244000 | C | 4.28302200  | 0.95118700  | 1.74306200  |
| H | -7.50175600 | 1.05132700  | -2.46205400 | O | 3.19797200  | 1.15972200  | 2.41696800  |
| C | -6.76287300 | 0.75954500  | -0.43076000 | C | 5.55345400  | 1.27412600  | 2.50964300  |
| O | -6.63018300 | 1.39725900  | 0.62356300  | H | 5.56109700  | 0.72724400  | 3.46002000  |
| N | -6.84666600 | -0.59496300 | -0.44793700 | H | 5.57249600  | 2.34453600  | 2.75145400  |
| H | -6.90957500 | -1.06048900 | -1.34535100 | O | 0.83769200  | 0.15547200  | 3.56881000  |
| C | -6.48766000 | -1.39879500 | 0.72802300  | C | 0.10821400  | -0.88063800 | 3.65065000  |
| H | -6.96144100 | -0.93408500 | 1.59814000  | O | -0.39135000 | -1.53687400 | 2.67504500  |
| H | -6.92740600 | -2.39472300 | 0.59232800  | C | -0.21632100 | -1.38967500 | 5.04563800  |
| C | -4.96382900 | -1.48221200 | 0.93847700  | H | -0.91187000 | -0.66523700 | 5.49807800  |
| H | -4.57119000 | -0.47082700 | 1.09261700  | H | -0.74783700 | -2.34350500 | 4.95019500  |
| H | -4.76692000 | -2.03516900 | 1.86722100  | C | 1.02846900  | -1.52982200 | 5.93858500  |
| C | -4.24712600 | -2.15380400 | -0.23400000 | H | 1.54461900  | -0.56235600 | 5.97913900  |
| H | -4.58467600 | -1.72932000 | -1.19146400 | H | 1.72799100  | -2.23898000 | 5.47161000  |
| H | -4.48131900 | -3.22634500 | -0.28888400 | C | 0.67605900  | -2.00521800 | 7.35172700  |
| C | -2.72383600 | -2.04425900 | -0.25963500 | H | 0.00131500  | -1.29705600 | 7.85308100  |
| O | -2.14192100 | -1.32861800 | 0.60081300  | H | 1.57737400  | -2.10227700 | 7.97062300  |
| O | -2.18584800 | -2.69472300 | -1.21602600 | H | 0.17684600  | -2.98404200 | 7.33332800  |
| O | -0.28884900 | 3.51104000  | 0.77273400  | O | 0.01977800  | -1.54023300 | -2.22323900 |
| C | 0.28204900  | 3.66864000  | 1.90057900  | H | -0.88871800 | -1.33314200 | -2.52191000 |
| O | 0.95712700  | 2.79800500  | 2.53695300  |   |             |             |             |

**Pro:**

|    |             |             |             |   |             |             |             |
|----|-------------|-------------|-------------|---|-------------|-------------|-------------|
| Ca | 2.62766600  | -0.20858900 | -1.12168600 | O | 2.26007500  | -0.91074300 | -3.56787200 |
| Mn | 0.00495700  | 2.03811700  | -0.29373400 | H | 2.77287800  | -1.73835200 | -3.55616400 |
| Mn | 1.34543200  | 0.84818900  | 1.77922600  | H | 1.33414800  | -1.21709200 | -3.46756900 |
| Mn | -0.20580600 | -1.16647800 | 0.69343500  | O | -0.78071900 | -3.96020400 | -3.08707600 |
| Mn | -0.43034500 | -3.60984400 | -1.34231400 | H | -0.13438000 | -4.63069500 | -3.37653300 |
| O  | 1.70394700  | 1.66256900  | 0.21137800  | O | -1.02072200 | -5.11955100 | -0.61048500 |
| O  | -0.39358200 | 0.75711500  | 1.09399900  | H | -0.76613000 | -5.04217500 | 0.33180300  |
| O  | 1.52211800  | -0.81606800 | 1.05849200  | O | 2.71748000  | -2.59262700 | -1.38005400 |
| O  | 0.07863000  | -0.52769900 | -1.15006500 | C | 2.48559800  | -3.81502800 | -1.40108600 |
| O  | -0.02476200 | -2.83497200 | 0.23708600  | O | 1.32359400  | -4.36504000 | -1.56534100 |
| O  | 4.84788800  | 0.39783300  | -2.11988100 | C | 3.61464600  | -4.83073900 | -1.24301200 |
| H  | 5.23234800  | 0.65548500  | -1.25756000 | H | 3.45440900  | -5.31895700 | -0.26958700 |
| H  | 4.50910000  | 1.22033400  | -2.52803700 | H | 3.46533500  | -5.61953000 | -1.99259500 |

|   |             |             |             |   |             |             |             |
|---|-------------|-------------|-------------|---|-------------|-------------|-------------|
| C | 5.01735400  | -4.22925700 | -1.32445100 | H | -4.94932700 | -2.03303600 | 1.58532200  |
| H | 5.16785000  | -3.47236600 | -0.54631800 | C | -4.34515500 | -2.07629000 | -0.49495200 |
| H | 5.19045500  | -3.74500900 | -2.29395600 | H | -4.61384500 | -1.57820900 | -1.44004100 |
| H | 5.77606300  | -5.01154400 | -1.19609400 | H | -4.64034500 | -3.12691100 | -0.62004000 |
| O | 0.51686700  | 2.84338700  | -1.97482400 | C | -2.81858000 | -2.04996600 | -0.44456500 |
| C | 1.66712100  | 2.81304200  | -2.58271900 | O | -2.24449400 | -1.31286200 | 0.40015700  |
| O | 2.51624700  | 1.91134000  | -2.45758500 | O | -2.26070500 | -2.77191900 | -1.34277100 |
| C | 1.90432700  | 3.99280500  | -3.51879200 | O | -0.18165200 | 3.64739700  | 1.10495000  |
| H | 1.06180300  | 4.01996600  | -4.22699400 | C | 0.40582000  | 3.59781900  | 2.22728100  |
| H | 1.80461400  | 4.90924700  | -2.91713900 | O | 1.03004300  | 2.59172800  | 2.69979500  |
| C | 3.23981500  | 3.96787900  | -4.26570100 | C | 0.37946200  | 4.86008200  | 3.08470100  |
| H | 3.32115700  | 3.02754900  | -4.82813400 | H | -0.63421700 | 5.27779000  | 3.01553100  |
| H | 4.06161200  | 3.95975800  | -3.53522100 | H | 1.03230200  | 5.58700500  | 2.57647200  |
| C | 3.40269900  | 5.16181200  | -5.21307200 | H | 6.39804400  | 0.55014300  | 2.01845100  |
| H | 2.61139100  | 5.17685800  | -5.97579200 | C | 0.81312800  | 4.67075300  | 4.53869300  |
| H | 4.36743200  | 5.12528900  | -5.73544000 | H | 0.78274300  | 5.62850400  | 5.07416900  |
| H | 3.35428200  | 6.11505000  | -4.66801000 | H | 0.15401000  | 3.96576300  | 5.06025600  |
| N | -1.98923800 | 2.27627500  | -0.77991700 | H | 1.83125200  | 4.27088500  | 4.59626400  |
| C | -2.69301800 | 1.91907600  | -1.91131600 | O | 4.32461100  | 0.31615600  | 0.56852600  |
| H | -2.18158500 | 1.59542400  | -2.80825400 | C | 4.25387500  | 0.67759000  | 1.76632900  |
| C | -4.04154100 | 2.06831600  | -1.67805800 | O | 3.16761500  | 0.89330700  | 2.42580300  |
| N | -4.12930900 | 2.54989900  | -0.37854000 | C | 5.52444300  | 0.91651000  | 2.56495000  |
| H | -5.00310800 | 2.60044700  | 0.15735500  | H | 5.45309600  | 0.42357600  | 3.54104900  |
| C | -2.88334300 | 2.64248700  | 0.12986700  | H | 5.63549500  | 1.99310400  | 2.75113200  |
| H | -2.64772100 | 2.95860400  | 1.13550200  | O | 0.74709300  | -0.00493300 | 3.50071700  |
| C | -5.23176500 | 1.78931400  | -2.56242000 | C | -0.06165200 | -0.97447000 | 3.55067900  |
| H | -5.25405700 | 2.50620700  | -3.39637500 | O | -0.58562400 | -1.57315200 | 2.54766800  |
| H | -5.09158200 | 0.80155300  | -3.02419200 | C | -0.48254100 | -1.47732500 | 4.92278500  |
| C | -6.62232700 | 1.83866300  | -1.87560500 | H | -1.24946000 | -0.77788300 | 5.29358300  |
| H | -6.88002100 | 2.87036000  | -1.61127000 | H | -0.96939000 | -2.45165400 | 4.79701400  |
| H | -7.37238100 | 1.48941800  | -2.59829400 | C | 0.67534100  | -1.55235800 | 5.93000800  |
| C | -6.68736800 | 1.02816800  | -0.58147400 | H | 1.15135200  | -0.56615000 | 5.99664600  |
| O | -6.54309400 | 1.57426700  | 0.52182300  | H | 1.44169000  | -2.24201500 | 5.54637400  |
| N | -6.83468800 | -0.31497800 | -0.70537400 | C | 0.20898100  | -2.01438600 | 7.31439700  |
| H | -6.91660300 | -0.70819600 | -1.63505500 | H | -0.53495600 | -1.32319300 | 7.73524300  |
| C | -6.57422700 | -1.22305200 | 0.41913600  | H | 1.05087800  | -2.06574600 | 8.01682100  |
| H | -7.05400700 | -0.79239800 | 1.30354100  | H | -0.25114900 | -3.01153900 | 7.27171100  |
| H | -7.06901300 | -2.17600800 | 0.19372000  | O | -0.06981600 | -1.55586000 | -2.18879200 |
| C | -5.06980400 | -1.41959800 | 0.68160500  | H | -1.01691300 | -1.47581800 | -2.43861600 |
| H | -4.61819000 | -0.44687500 | 0.90609200  |   |             |             |             |



### W3 (water)-W2 (oxyl)

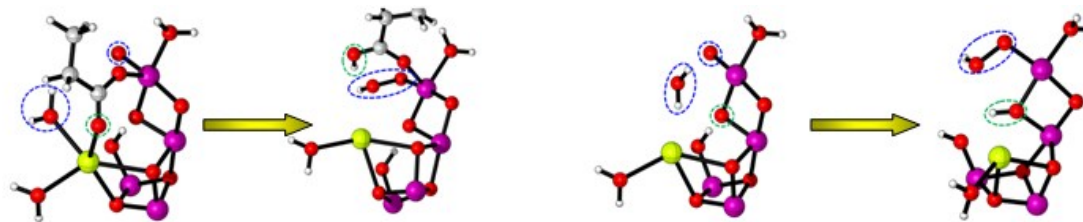

**Fig. S5** Pictorial exhibitions for the open-cubane water (W3/crystal or solvent water)-W2 (oxyl) nucleophilic attack with Ca-bound O of Asp170 (left) and O5 (right) as the proton acceptors. The green dotted circle stands for the proton acceptor, the same below.

**Table S5** Reaction parameters for the open-cubane W3 (hydroxyl)-W2 (oxyl) nucleophilic attack with Ca-bound O of Asp170 as the proton acceptor:

| Spin state | Spin topology<br>(Mn1~Mn4-O7)    | Gibbs Free energy (a.u.) |            |            |
|------------|----------------------------------|--------------------------|------------|------------|
|            |                                  | Rea                      | TS         | Pro        |
| doublet    | $\alpha\alpha\beta\alpha$        | -3366.2094               | -3366.1457 | -3366.1458 |
|            | $\alpha\beta\alpha\beta$         | -3366.2095               | -3366.1461 | -3366.1464 |
|            | $\alpha\beta\beta\alpha\alpha$   | -3366.2028               | -3366.1477 | -3366.1873 |
|            | $\beta\alpha\alpha\beta$         | -3366.2111               | -3366.1464 | -3366.1465 |
|            | $\beta\alpha\beta\alpha\alpha$   | -3366.2022               | -3366.1462 | -3366.1882 |
|            | $\beta\beta\alpha\alpha\alpha$   | -3366.2014               | -3366.1446 | -3366.1837 |
| sextet     | $\alpha\alpha\alpha\beta\beta$   | -3366.2048               | -3366.1506 | -3366.1895 |
|            | $\alpha\alpha\beta\alpha\beta$   | -3366.2103               | -3366.1477 | -3366.1479 |
|            | $\alpha\beta\alpha\alpha\beta$   | -3366.2109               | -3366.1462 | -3366.1463 |
|            | $\beta\alpha\alpha\alpha\beta$   | -3366.2111               | -3366.1464 | -3366.1468 |
| octet      | $\alpha\alpha\alpha\beta\alpha$  | -3366.2125               | -3366.1477 | -3366.1478 |
|            | $\alpha\alpha\beta\alpha\alpha$  | -3366.2037               | -3366.1474 | -3366.1896 |
|            | $\alpha\beta\alpha\alpha\alpha$  | -3366.2028               | -3366.1446 | -3366.1862 |
|            | $\beta\alpha\alpha\alpha\alpha$  | -3366.2031               | -3366.1448 | -3366.1867 |
| 12-et      | $\alpha\alpha\alpha\alpha\beta$  | -3366.2116               | -3366.1471 | -3366.1475 |
| 14-et      | $\alpha\alpha\alpha\alpha\alpha$ | -3366.2036               | -3366.1453 | -3366.1871 |

  

| Spin state | Spin topology<br>(Mn1~Mn4-O7)  | Relative Gibbs Free energy (kcal/mol) |                      |                  |                  |
|------------|--------------------------------|---------------------------------------|----------------------|------------------|------------------|
|            |                                | $\Delta G^\ddagger$ (Rea-TS)          | $\Delta G$ (Rea-Pro) | $\Delta G$ (Rea) | $\Delta G$ (Pro) |
| doublet    | $\alpha\alpha\beta\beta\alpha$ | 40.0                                  | 39.9                 | 1.9              | 27.5             |
|            | $\alpha\beta\alpha\beta\alpha$ | 39.8                                  | 39.6                 | 1.9              | 27.1             |
|            | $\alpha\beta\beta\alpha\alpha$ | 34.6                                  | 9.7                  | 6.1              | 1.4              |
|            | $\beta\alpha\alpha\beta\alpha$ | 40.6                                  | 40.5                 | 0.9              | 27.0             |
|            | $\beta\alpha\beta\alpha\alpha$ | 35.1                                  | 8.8                  | 6.5              | 0.9              |

|        |                                  |                                 |      |      |      |
|--------|----------------------------------|---------------------------------|------|------|------|
|        | $\beta\beta\alpha\alpha$         | 35.6                            | 11.1 | 7.0  | 3.7  |
| sextet | $\alpha\alpha\alpha\beta\beta$   | 34.0                            | 9.6  | 4.8  | 0.1  |
|        | $\alpha\alpha\beta\alpha\beta$   | 39.3                            | 39.2 | 1.4  | 26.2 |
|        | $\alpha\beta\alpha\alpha\beta$   | 40.6                            | 40.5 | 1.0  | 27.2 |
|        | $\beta\alpha\alpha\alpha\beta$   | 40.6                            | 40.3 | 0.9  | 26.9 |
|        | $\alpha\alpha\alpha\beta\alpha$  | 40.7                            | 40.6 | 0.0  | 26.2 |
| octet  | $\alpha\alpha\beta\alpha\alpha$  | 35.3                            | 8.8  | 5.5  | 0.0  |
|        | $\alpha\beta\alpha\alpha\alpha$  | 36.5                            | 10.4 | 6.1  | 2.1  |
|        | $\beta\alpha\alpha\alpha\alpha$  | 36.6                            | 10.3 | 5.9  | 1.8  |
|        | 12-et                            | $\alpha\alpha\alpha\alpha\beta$ | 40.5 | 40.2 | 0.6  |
| 14-et  | $\alpha\alpha\alpha\alpha\alpha$ | 36.6                            | 10.4 | 5.6  | 1.6  |

| Spin state | Spin topology |       | Mulliken spin density |       |       |
|------------|---------------|-------|-----------------------|-------|-------|
|            | (Mn1~Mn4-O7)  |       | Rea                   | TS    | Pro   |
| doublet    | $\alpha$      | Mn1   | 2.96                  | 2.94  | 2.94  |
|            | $\alpha$      | Mn2   | 2.94                  | 2.94  | 2.94  |
|            | $\beta$       | Mn3   | -2.88                 | -2.85 | -2.84 |
|            | $\beta$       | Mn4   | -2.68                 | -2.05 | -1.96 |
|            | $\alpha$      | O7    | 0.74                  | -0.02 | -0.04 |
|            |               | O8    | 0.00                  | 0.11  | 0.03  |
|            | $\alpha$      | Mn1   | 2.95                  | 2.93  | 2.93  |
|            | $\beta$       | Mn2   | -2.91                 | -2.91 | -2.91 |
|            | $\alpha$      | Mn3   | 2.87                  | 2.89  | 2.91  |
|            | $\beta$       | Mn4   | -2.64                 | -2.03 | -1.97 |
|            | $\alpha$      | O7    | 0.78                  | -0.03 | -0.04 |
|            |               | O8    | 0.00                  | 0.10  | 0.03  |
|            | $\alpha$      | Mn1   | 2.94                  | 2.93  | 2.93  |
|            | $\beta$       | Mn2   | -2.93                 | -2.93 | -2.92 |
|            | $\beta$       | Mn3   | -2.91                 | -2.86 | -2.84 |
|            | $\alpha$      | Mn4   | 2.74                  | 3.27  | 3.84  |
| $\alpha$   | O7            | 1.01  | 0.36                  | 0.01  |       |
|            | O8            | 0.00  | 0.30                  | 0.02  |       |
| $\beta$    | Mn1           | -2.94 | -2.92                 | -2.92 |       |
| $\alpha$   | Mn2           | 2.93  | 2.93                  | 2.93  |       |
| $\alpha$   | Mn3           | 2.91  | 2.91                  | 2.92  |       |
| $\beta$    | Mn4           | -2.65 | -2.01                 | -1.96 |       |
| $\alpha$   | O7            | 0.79  | -0.03                 | -0.04 |       |
|            | O8            | 0.00  | 0.09                  | 0.04  |       |
| $\beta$    | Mn1           | -2.94 | -2.93                 | -2.93 |       |
| $\alpha$   | Mn2           | -2.91 | 2.92                  | 2.92  |       |
| $\beta$    | Mn3           | -2.89 | -2.84                 | -2.82 |       |
| $\alpha$   | Mn4           | 2.74  | 3.27                  | 3.84  |       |
| $\alpha$   | O7            | 1.01  | 0.36                  | 0.01  |       |
|            | O8            | 0.00  | 0.30                  | 0.02  |       |

|        |          |          |       |       |       |       |
|--------|----------|----------|-------|-------|-------|-------|
|        | $\beta$  | Mn1      | -2.95 | -2.94 | -2.94 |       |
|        | $\beta$  | Mn2      | -2.94 | -2.94 | -2.93 |       |
|        | $\alpha$ | Mn3      | 2.89  | 2.91  | 2.92  |       |
|        | $\alpha$ | Mn4      | 2.80  | 3.32  | 3.85  |       |
|        | $\alpha$ | O7       | 1.01  | 0.35  | 0.01  |       |
|        |          | O8       | 0.00  | 0.30  | 0.02  |       |
|        | $\alpha$ | Mn1      | 2.96  | 2.96  | 2.95  |       |
|        | $\alpha$ | Mn2      | 2.96  | 2.95  | 2.94  |       |
|        | $\alpha$ | Mn3      | 2.92  | 2.87  | 2.84  |       |
|        | $\beta$  | Mn4      | -2.74 | -3.27 | -3.84 |       |
|        | $\beta$  | O7       | -1.01 | -0.36 | -0.01 |       |
|        |          | O8       | 0.00  | -0.30 | -0.02 |       |
| sextet | $\alpha$ | Mn1      | 2.96  | 2.94  | 2.94  |       |
|        | $\alpha$ | Mn2      | 2.94  | 2.93  | 2.93  |       |
|        | $\beta$  | Mn3      | -2.87 | -2.89 | -2.93 |       |
|        | $\alpha$ | Mn4      | 2.64  | 2.03  | 1.97  |       |
|        | $\beta$  | O7       | -0.78 | 0.03  | 0.04  |       |
|        |          | O8       | 0.00  | -0.10 | -0.03 |       |
|        | $\alpha$ | Mn1      | 2.95  | -2.93 | 2.93  |       |
|        | $\beta$  | Mn2      | -2.91 | -2.92 | -2.92 |       |
|        | $\alpha$ | Mn3      | 2.88  | 2.85  | 2.84  |       |
|        | $\alpha$ | Mn4      | 2.68  | 2.05  | 1.96  |       |
|        | $\beta$  | O7       | -0.74 | 0.02  | 0.04  |       |
|        |          | O8       | 0.00  | -0.11 | -0.03 |       |
|        |          | $\beta$  | Mn1   | -2.94 | -2.92 | -2.92 |
|        |          | $\alpha$ | Mn2   | 2.93  | 2.93  | 2.93  |
|        | $\alpha$ | Mn3      | 2.91  | 2.88  | 2.87  |       |
|        | $\alpha$ | Mn4      | 2.68  | 2.05  | 1.96  |       |
|        | $\beta$  | O7       | -0.74 | 0.03  | 0.04  |       |
|        |          | O8       | 0.00  | -0.10 | -0.03 |       |
| octet  | $\alpha$ | Mn1      | 2.96  | 2.95  | 2.95  |       |
|        | $\alpha$ | Mn2      | 2.96  | 2.95  | 2.95  |       |
|        | $\alpha$ | Mn3      | 2.91  | 2.92  | 2.93  |       |
|        | $\beta$  | Mn4      | -2.65 | -2.02 | -1.96 |       |
|        | $\alpha$ | O7       | 0.79  | -0.03 | -0.04 |       |
|        |          | O8       | 0.00  | 0.09  | 0.03  |       |
|        |          | $\alpha$ | Mn1   | 2.96  | 2.94  | 2.94  |
|        |          | $\alpha$ | Mn2   | 2.94  | 2.94  | 2.94  |
|        |          | $\beta$  | Mn3   | -2.89 | -2.83 | -2.81 |
|        |          | $\alpha$ | Mn4   | 2.74  | 3.27  | 3.84  |
|        |          | $\alpha$ | O7    | 1.01  | 0.36  | 0.01  |
|        |          |          | O8    | 0.00  | 0.30  | 0.02  |
|        |          | $\alpha$ | Mn1   | 2.95  | 2.93  | 2.93  |
|        |          | $\beta$  | Mn2   | -2.91 | -2.91 | -2.91 |

|       |          |     |       |       |       |
|-------|----------|-----|-------|-------|-------|
|       | $\alpha$ | Mn3 | 2.89  | 2.91  | 2.92  |
|       | $\alpha$ | Mn4 | 2.80  | 3.31  | 3.85  |
|       | $\alpha$ | O7  | 1.01  | 0.35  | 0.01  |
|       |          | O8  | 0.00  | 0.30  | 0.02  |
|       | $\beta$  | Mn1 | -2.94 | -2.93 | -2.92 |
|       | $\alpha$ | Mn2 | 2.93  | 2.93  | 2.93  |
|       | $\alpha$ | Mn3 | 2.92  | 2.94  | 2.95  |
|       | $\alpha$ | Mn4 | 2.80  | 3.32  | 3.85  |
|       | $\alpha$ | O7  | 1.01  | 0.35  | 0.01  |
|       |          | O8  | 0.00  | 0.30  | 0.02  |
| 12-et | $\alpha$ | Mn1 | 2.97  | 2.95  | 2.95  |
|       | $\alpha$ | Mn2 | 2.96  | 2.95  | 2.95  |
|       | $\alpha$ | Mn3 | 2.92  | 2.87  | 2.88  |
|       | $\alpha$ | Mn4 | 2.68  | 2.05  | 1.96  |
|       | $\beta$  | O7  | -0.74 | 0.03  | 0.04  |
|       |          | O8  | 0.00  | -0.10 | -0.03 |
| 14-et | $\alpha$ | Mn1 | 2.97  | 2.95  | 2.95  |
|       | $\alpha$ | Mn2 | 2.96  | 2.95  | 2.95  |
|       | $\alpha$ | Mn3 | 2.93  | 2.95  | 2.95  |
|       | $\alpha$ | Mn4 | 2.80  | 3.32  | 3.85  |
|       | $\alpha$ | O7  | 1.01  | 0.35  | 0.01  |
|       |          | O8  | 0.00  | 0.30  | 0.02  |

**Rea:**

|    |             |             |             |   |            |             |             |
|----|-------------|-------------|-------------|---|------------|-------------|-------------|
| Ca | 2.36535900  | -0.21295000 | -1.30529900 | C | 3.20396800 | -3.62765600 | -0.71009300 |
| Mn | -0.10820400 | 1.89356000  | -0.57334400 | O | 2.02289300 | -4.14173800 | -0.57457700 |
| Mn | 1.21130900  | 0.98364100  | 1.68526200  | C | 4.34608100 | -4.59595100 | -0.41538300 |
| Mn | -0.13177100 | -1.33664200 | 0.91212600  | H | 5.24440600 | -4.20173300 | -0.90604800 |
| Mn | 0.26002100  | -3.46455800 | -0.71005700 | H | 4.52837100 | -4.52973300 | 0.66907700  |
| O  | 1.56435900  | 1.70115700  | 0.05834900  | C | 4.07879200 | -6.05116700 | -0.81248600 |
| O  | -0.45976000 | 0.69176000  | 0.84571600  | H | 3.90915600 | -6.14253700 | -1.89299700 |
| O  | 1.52721700  | -0.74339200 | 1.28555400  | H | 3.19083800 | -6.43880200 | -0.30259300 |
| O  | 0.42433500  | -1.72137100 | -0.80422800 | H | 4.93759500 | -6.68164000 | -0.54941100 |
| O  | 0.03488500  | -3.10645500 | 1.07147800  | O | 0.51274000 | 3.17264500  | -1.88870800 |
| O  | 4.83073200  | -0.34547900 | -2.01259300 | C | 1.64594600 | 3.04561900  | -2.53213200 |
| H  | 5.10057500  | 0.12207900  | -1.19314800 | O | 2.29567800 | 1.99104000  | -2.64611400 |
| H  | 4.84983900  | -1.28794600 | -1.74380200 | C | 2.13150700 | 4.34399400  | -3.16666800 |
| O  | 1.79371700  | -1.43866900 | -3.40938600 | H | 1.25939400 | 4.87515500  | -3.57318000 |
| H  | 1.26875300  | -2.24397000 | -3.14818500 | H | 2.50061400 | 4.97409900  | -2.34070700 |
| H  | 2.50972500  | -1.77552100 | -3.97207500 | C | 3.22183000 | 4.15988800  | -4.22597100 |
| O  | 0.50073100  | -3.78656400 | -2.53303000 | H | 2.83745000 | 3.51991400  | -5.03338100 |
| O  | -0.32961700 | -5.48133100 | -0.11599200 | H | 4.06217100 | 3.61068500  | -3.78254300 |
| H  | -1.26170900 | -5.43771700 | -0.40686200 | C | 3.70546900 | 5.49429400  | -4.80410900 |
| H  | -0.35367300 | -5.25766100 | 0.83865500  | H | 2.88361800 | 6.04819600  | -5.27987200 |
| O  | 3.44774200  | -2.44853500 | -1.02320700 | H | 4.12743300 | 6.13943800  | -4.02037300 |

|   |             |             |             |   |             |             |             |
|---|-------------|-------------|-------------|---|-------------|-------------|-------------|
| H | 4.48459700  | 5.33883300  | -5.56174300 | C | 0.05688600  | 3.66402400  | 1.74541600  |
| N | -2.13720100 | 2.07615100  | -1.08526000 | O | 0.77197800  | 2.83811600  | 2.37528600  |
| C | -2.75733200 | 1.59237600  | -2.21726200 | C | -0.17099600 | 5.04080400  | 2.35711000  |
| H | -2.18256500 | 1.18320900  | -3.03538500 | H | -1.23675200 | 5.28001500  | 2.23744600  |
| C | -4.11945900 | 1.69836400  | -2.07770300 | H | 0.36367700  | 5.75400400  | 1.71099500  |
| N | -4.31131300 | 2.26888700  | -0.82390700 | C | 0.27852000  | 5.17917500  | 3.81165200  |
| H | -5.20083500 | 2.23982300  | -0.32050300 | H | 0.09863700  | 6.20103500  | 4.16925900  |
| C | -3.09745700 | 2.46110200  | -0.25750000 | H | -0.26692900 | 4.48580300  | 4.46315100  |
| H | -2.93947100 | 2.85104000  | 0.73688400  | H | 1.34589000  | 4.95620300  | 3.91613000  |
| C | -5.22781600 | 1.34876900  | -3.03443500 | O | 4.09805900  | 0.51067800  | 0.44263300  |
| H | -5.32180600 | 2.12742300  | -3.80671600 | C | 4.07786200  | 0.98248800  | 1.59856000  |
| H | -4.93540900 | 0.43400000  | -3.56838700 | O | 3.01599000  | 1.23626000  | 2.29443000  |
| C | -6.63028300 | 1.15687700  | -2.40244200 | C | 5.37403900  | 1.32081400  | 2.31685100  |
| H | -7.04462900 | 2.12448500  | -2.09747100 | H | 6.23786500  | 1.03221500  | 1.71144500  |
| H | -7.30235100 | 0.74208500  | -3.16614400 | H | 5.40604700  | 0.80712200  | 3.28518200  |
| C | -6.60742900 | 0.28299300  | -1.15089400 | H | 5.40854300  | 2.39884100  | 2.51939000  |
| O | -6.56715200 | 0.78414200  | -0.02030000 | O | 0.56156300  | 0.45315300  | 3.49269600  |
| N | -6.57424200 | -1.06045700 | -1.35398300 | C | -0.27996400 | -0.47661600 | 3.68732500  |
| H | -6.58290000 | -1.40560900 | -2.30563400 | O | -0.76912000 | -1.23146200 | 2.78832600  |
| C | -6.34399900 | -2.01201700 | -0.26327900 | C | -0.72737800 | -0.73841300 | 5.11771500  |
| H | -6.96852300 | -1.70101300 | 0.58128700  | H | -1.72482800 | -1.19468700 | 5.07781700  |
| H | -6.70245200 | -2.99140500 | -0.60534200 | H | -0.05023300 | -1.51284300 | 5.51486500  |
| C | -4.87635200 | -2.08401100 | 0.18907700  | C | -0.70570400 | 0.49263000  | 6.03173900  |
| H | -4.56721300 | -1.10123200 | 0.56004800  | H | -1.37731400 | 1.26016400  | 5.61908600  |
| H | -4.81777600 | -2.77392700 | 1.04362700  | H | 0.30081600  | 0.92889800  | 6.01954300  |
| C | -3.91249000 | -2.53971200 | -0.91314300 | C | -1.12289300 | 0.15675400  | 7.46757000  |
| H | -3.99680800 | -1.87121800 | -1.78455500 | H | -2.13979200 | -0.25901200 | 7.50445000  |
| H | -4.14151000 | -3.55291800 | -1.26829900 | H | -1.10517700 | 1.05094100  | 8.10409600  |
| C | -2.44534100 | -2.49392700 | -0.49920200 | H | -0.44612300 | -0.58448800 | 7.91569600  |
| O | -2.08704200 | -1.60631700 | 0.31200000  | O | 0.00670600  | 0.59290300  | -1.85133600 |
| O | -1.68754300 | -3.37800900 | -1.04836700 | H | 0.23285800  | 1.02324200  | -2.69700900 |
| O | -0.50032500 | 3.45679400  | 0.61395700  |   |             |             |             |

**TS:**

|    |             |             |             |   |             |             |             |
|----|-------------|-------------|-------------|---|-------------|-------------|-------------|
| Ca | 2.22977500  | 0.55952400  | -1.18631500 | H | 4.95167900  | 0.33337100  | -1.13017000 |
| Mn | -0.58303300 | 1.99074400  | -0.56756200 | H | 4.67558300  | -0.97619900 | -1.98911100 |
| Mn | 0.87512400  | 1.27294700  | 1.66587400  | O | 2.43139600  | -2.79802700 | -3.56534700 |
| Mn | 0.15842700  | -1.31008900 | 0.69248600  | H | 2.58922800  | -3.52530200 | -4.19751700 |
| Mn | 1.14235900  | -3.29523600 | -0.85648200 | H | 3.27739400  | -2.78737200 | -2.89475300 |
| O  | 1.07119500  | 2.19051000  | 0.10319700  | O | 1.45660800  | -3.92305700 | -2.52154800 |
| O  | -0.66931000 | 0.69489900  | 0.75403300  | O | 0.94252500  | -5.41153000 | -0.06993200 |
| O  | 1.60060500  | -0.28215600 | 1.14584000  | H | -0.01183800 | -5.44441000 | -0.28671300 |
| O  | 0.91802200  | -1.51763900 | -0.98081700 | H | 0.96393900  | -5.09577100 | 0.85719200  |
| O  | 0.76355100  | -2.93666700 | 0.93684700  | O | 4.39150400  | -2.70615800 | -2.03138500 |
| O  | 4.45940100  | -0.01260200 | -1.90046100 | C | 4.25648100  | -3.22537300 | -0.85879200 |

|   |             |             |             |   |             |             |             |
|---|-------------|-------------|-------------|---|-------------|-------------|-------------|
| O | 3.16341900  | -3.54086500 | -0.32980000 | C | -4.25560000 | -2.99677700 | 0.22235800  |
| C | 5.54187900  | -3.44408000 | -0.06867200 | H | -4.10294800 | -1.94945200 | 0.50427400  |
| H | 6.20258500  | -4.05820300 | -0.69781500 | H | -4.02818900 | -3.59706800 | 1.11559000  |
| H | 6.04093500  | -2.46525100 | 0.00511500  | C | -3.28694100 | -3.36496000 | -0.90853700 |
| C | 5.34882500  | -4.06508700 | 1.31403600  | H | -3.54825700 | -2.80641700 | -1.82170400 |
| H | 4.88056000  | -5.05340100 | 1.23787800  | H | -3.33848800 | -4.43143400 | -1.16367600 |
| H | 4.70040100  | -3.44045400 | 1.93884900  | C | -1.82811500 | -3.01598000 | -0.61193800 |
| H | 6.31594500  | -4.17971800 | 1.82001400  | O | -1.62822500 | -1.97105900 | 0.07930900  |
| O | -0.17456300 | 3.39014800  | -1.89819300 | O | -0.93949400 | -3.77691600 | -1.10365800 |
| C | 0.98245100  | 3.50360000  | -2.48708600 | O | -1.30618000 | 3.39009900  | 0.63633600  |
| O | 1.84434900  | 2.60229600  | -2.58351100 | C | -0.83695600 | 3.64909700  | 1.80157200  |
| C | 1.23242700  | 4.88141800  | -3.09046700 | O | 0.00383300  | 2.95437400  | 2.43034800  |
| H | 0.28986300  | 5.24052300  | -3.52673200 | C | -1.36155300 | 4.92406900  | 2.45043600  |
| H | 1.43903600  | 5.55558600  | -2.24286700 | H | -2.45335500 | 4.93105900  | 2.32454300  |
| C | 2.37802200  | 4.93654600  | -4.10490300 | H | -0.99063400 | 5.75651100  | 1.83311700  |
| H | 2.16010900  | 4.24973500  | -4.93582000 | C | -0.96271800 | 5.10814200  | 3.91447500  |
| H | 3.29267200  | 4.55617200  | -3.63222500 | H | -1.36144900 | 6.05502200  | 4.30027500  |
| C | 2.61056200  | 6.35111800  | -4.64705900 | H | -1.34999000 | 4.29251000  | 4.53675000  |
| H | 1.71442200  | 6.74102700  | -5.15039900 | H | 0.12693400  | 5.11755100  | 4.02670700  |
| H | 2.86544300  | 7.05117900  | -3.83877900 | O | 3.86778700  | 1.35896600  | 0.46998000  |
| H | 3.43387500  | 6.36750700  | -5.37310200 | C | 3.72519600  | 1.77505100  | 1.64404700  |
| N | -2.58626600 | 1.73080300  | -1.14134400 | O | 2.60986200  | 1.87984500  | 2.28830000  |
| C | -3.05739200 | 1.04853400  | -2.24347500 | C | 4.94266700  | 2.19979800  | 2.44934000  |
| H | -2.38885300 | 0.72509800  | -3.02772200 | H | 5.82358500  | 2.27541200  | 1.80543300  |
| C | -4.40895300 | 0.84407300  | -2.11694100 | H | 5.12911300  | 1.45621200  | 3.23570100  |
| N | -4.75167700 | 1.42913000  | -0.90307100 | H | 4.75177100  | 3.15789400  | 2.94568800  |
| H | -5.61491000 | 1.21130100  | -0.39916300 | O | 0.36067500  | 0.51101900  | 3.40453500  |
| C | -3.62646900 | 1.93086900  | -0.34411000 | C | -0.27607700 | -0.58696600 | 3.51477300  |
| H | -3.58126400 | 2.40428000  | 0.62520900  | O | -0.57436900 | -1.36498300 | 2.56163900  |
| C | -5.38670900 | 0.18557600  | -3.05282200 | C | -0.69234700 | -1.00722100 | 4.91651000  |
| H | -5.64736000 | 0.87200600  | -3.87293100 | H | -1.47108900 | -1.77384000 | 4.82144200  |
| H | -4.87748400 | -0.66531200 | -3.52609000 | H | 0.18472700  | -1.50057000 | 5.36682200  |
| C | -6.71550400 | -0.29381300 | -2.41471300 | C | -1.14857500 | 0.15225800  | 5.81307200  |
| H | -7.34656200 | 0.56580900  | -2.16163800 | H | -2.01725900 | 0.64491900  | 5.35078300  |
| H | -7.26228900 | -0.89023100 | -3.15784800 | H | -0.35173900 | 0.90530900  | 5.85263900  |
| C | -6.50629700 | -1.07595100 | -1.12018600 | C | -1.51107900 | -0.31421400 | 7.22694400  |
| O | -6.57433100 | -0.51702400 | -0.01811700 | H | -2.32458200 | -1.05321700 | 7.21049700  |
| N | -6.19119600 | -2.39059900 | -1.25716900 | H | -1.83861200 | 0.52828100  | 7.84994100  |
| H | -6.11485900 | -2.77063500 | -2.19247400 | H | -0.64947900 | -0.78147700 | 7.72447300  |
| C | -5.73622400 | -3.21212700 | -0.13149700 | O | -0.13859000 | 0.76395500  | -1.88508500 |
| H | -6.36030000 | -2.95300500 | 0.73024900  | H | -0.11956500 | 1.28475100  | -2.70835400 |
| H | -5.93522300 | -4.26025400 | -0.39036000 |   |             |             |             |

**Pro:**

|    |            |            |             |    |             |            |             |
|----|------------|------------|-------------|----|-------------|------------|-------------|
| Ca | 2.12578800 | 0.75105300 | -1.20578800 | Mn | -0.76670800 | 1.95850600 | -0.50391000 |
|----|------------|------------|-------------|----|-------------|------------|-------------|

|    |             |             |             |   |             |             |             |
|----|-------------|-------------|-------------|---|-------------|-------------|-------------|
| Mn | 0.73013500  | 1.21253600  | 1.69438600  | C | -4.50462000 | 0.59180600  | -2.09507600 |
| Mn | 0.22829700  | -1.36566100 | 0.57536900  | N | -4.89758800 | 1.15033000  | -0.88376300 |
| Mn | 1.40741900  | -3.10602900 | -1.10156300 | H | -5.74838400 | 0.87246600  | -0.38869900 |
| O  | 0.86808200  | 2.22873200  | 0.18228600  | C | -3.81224200 | 1.71999000  | -0.31065200 |
| O  | -0.75890100 | 0.58199200  | 0.73810400  | H | -3.80751000 | 2.19263900  | 0.66005200  |
| O  | 1.58491700  | -0.23971700 | 1.10836900  | C | -5.42902100 | -0.12231200 | -3.04411100 |
| O  | 0.95670600  | -1.34587200 | -1.08765600 | H | -5.72881400 | 0.55200400  | -3.86102900 |
| O  | 1.01560400  | -2.93407800 | 0.69751200  | H | -4.86025700 | -0.93328600 | -3.51963200 |
| O  | 4.50263700  | 0.46757600  | -1.70578600 | C | -6.72748900 | -0.69483900 | -2.42039100 |
| H  | 4.77299600  | 0.89691700  | -0.86208800 | H | -7.41600000 | 0.11849800  | -2.16400800 |
| H  | 4.95199000  | -0.40056800 | -1.75146300 | H | -7.22846300 | -1.31939100 | -3.17272200 |
| O  | 2.76299200  | -1.96096400 | -3.22200400 | C | -6.47313500 | -1.47371900 | -1.13184000 |
| H  | 2.76380300  | -2.02616700 | -4.19495400 | O | -6.58500600 | -0.93054200 | -0.02555800 |
| H  | 4.16002900  | -2.29750300 | -2.46122000 | N | -6.07066200 | -2.76300900 | -1.28166700 |
| O  | 2.01490800  | -3.19494900 | -2.89779000 | H | -5.95321700 | -3.11931400 | -2.22215200 |
| O  | 1.40944400  | -5.25222900 | -0.75973700 | C | -5.54178800 | -3.55815300 | -0.16907700 |
| H  | 0.43243700  | -5.29591000 | -0.87674100 | H | -6.15247400 | -3.32444600 | 0.70909400  |
| H  | 1.53996200  | -5.22908400 | 0.20901000  | H | -5.69837100 | -4.61595400 | -0.41860100 |
| O  | 5.01542900  | -2.33599300 | -1.91347600 | C | -4.06287300 | -3.26937800 | 0.13616500  |
| C  | 4.80397200  | -3.00132200 | -0.76219500 | H | -3.95201900 | -2.21422100 | 0.40860200  |
| O  | 3.70779300  | -3.41835400 | -0.41635100 | H | -3.77750600 | -3.85095700 | 1.02504600  |
| C  | 6.06565600  | -3.16626300 | 0.05702400  | C | -3.11203700 | -3.59671500 | -1.02131900 |
| H  | 6.80031700  | -3.68719000 | -0.57446200 | H | -3.43091000 | -3.06408900 | -1.93215300 |
| H  | 6.48446500  | -2.16183500 | 0.22127800  | H | -3.11817400 | -4.66713500 | -1.26699600 |
| C  | 5.83871000  | -3.89624000 | 1.37993300  | C | -1.65860400 | -3.17529000 | -0.78257000 |
| H  | 5.45372100  | -4.90812900 | 1.20867300  | O | -1.49594000 | -2.15708200 | -0.03497600 |
| H  | 5.10969300  | -3.36492100 | 2.00213400  | O | -0.75167900 | -3.83450400 | -1.36582700 |
| H  | 6.78055900  | -3.97512100 | 1.93595200  | O | -1.59053900 | 3.23530100  | 0.76831200  |
| O  | -0.43395200 | 3.47548800  | -1.74389700 | C | -1.14747500 | 3.45907400  | 1.95143900  |
| C  | 0.71580300  | 3.69495900  | -2.31253300 | O | -0.26387900 | 2.79086700  | 2.54688300  |
| O  | 1.63089400  | 2.85415100  | -2.46937200 | C | -1.76708700 | 4.65428100  | 2.66613700  |
| C  | 0.89236600  | 5.12572500  | -2.81147700 | H | -2.85698500 | 4.58134300  | 2.54341700  |
| H  | -0.07165900 | 5.47200100  | -3.20910600 | H | -1.46724500 | 5.54458000  | 2.09264000  |
| H  | 1.07994000  | 5.74182200  | -1.91650700 | C | -1.37619500 | 4.79249600  | 4.13730300  |
| C  | 2.02021200  | 5.31393000  | -3.82988000 | H | -1.84641800 | 5.68315500  | 4.57344600  |
| H  | 1.82302000  | 4.68425800  | -4.71003000 | H | -1.69382800 | 3.91681800  | 4.71579500  |
| H  | 2.95781300  | 4.94184400  | -3.39724100 | H | -0.29003100 | 4.88225700  | 4.24840100  |
| C  | 2.17958800  | 6.77556800  | -4.26269900 | O | 3.69850500  | 1.63866600  | 0.53354900  |
| H  | 1.25944400  | 7.16039100  | -4.72494200 | C | 3.52535600  | 1.97474800  | 1.73256100  |
| H  | 2.41250800  | 7.42212900  | -3.40475800 | O | 2.41201800  | 1.93967200  | 2.37624300  |
| H  | 2.99128500  | 6.88752200  | -4.99350400 | C | 4.70611100  | 2.46610700  | 2.55548300  |
| N  | -2.75243400 | 1.58878500  | -1.09637600 | H | 5.58055900  | 2.63290500  | 1.91974700  |
| C  | -3.16726900 | 0.88101900  | -2.20544400 | H | 4.94765400  | 1.71715700  | 3.32133000  |
| H  | -2.46694400 | 0.59957600  | -2.97803700 | H | 4.43870000  | 3.39094000  | 3.07915000  |

|   |             |             |            |   |             |             |             |
|---|-------------|-------------|------------|---|-------------|-------------|-------------|
| O | 0.27030100  | 0.33166900  | 3.38745100 | H | -0.60962500 | 0.58096800  | 5.80330900  |
| C | -0.25236300 | -0.83136100 | 3.44668400 | C | -1.58326100 | -0.83287700 | 7.13489700  |
| O | -0.47664900 | -1.58965700 | 2.46159700 | H | -2.26527400 | -1.69372500 | 7.09002500  |
| C | -0.61699200 | -1.34438100 | 4.83257300 | H | -2.05576200 | -0.06564900 | 7.76222000  |
| H | -1.26012200 | -2.22411200 | 4.70935000 | H | -0.66709000 | -1.16276900 | 7.64494900  |
| H | 0.32023000  | -1.69338800 | 5.29602900 | O | -0.25096100 | 0.87177800  | -1.91452400 |
| C | -1.27342200 | -0.28999400 | 5.73590700 | H | -0.27912500 | 1.46533700  | -2.68665700 |
| H | -2.20166400 | 0.06296800  | 5.26154300 |   |             |             |             |

**Table S6** Reaction parameters for the open-cubane crystal or solvent water-W2 (oxyl) nucleophilic attack with O5 as the proton acceptor:

| Spin state | Spin topology<br>(Mn1~Mn4-O7)    | Gibbs Free energy (a.u.) |            |            |
|------------|----------------------------------|--------------------------|------------|------------|
|            |                                  | Rea                      | TS         | Pro        |
| doublet    | $\alpha\alpha\beta\alpha$        | -3366.2184               | -3366.1729 | -3366.1852 |
|            | $\alpha\beta\alpha\beta$         | -3366.2187               | -3366.1734 | -3366.1856 |
|            | $\alpha\beta\beta\alpha$         | -3366.2084               | -3366.1620 | -3366.2210 |
|            | $\beta\alpha\alpha\beta$         | -3366.2189               | -3366.1732 | -3366.1853 |
|            | $\beta\alpha\beta\alpha$         | -3366.2086               | -3366.1624 | -3366.2211 |
|            | $\beta\beta\alpha\alpha$         | -3366.2082               | -3366.1601 | -3366.2216 |
| sextet     | $\alpha\alpha\alpha\beta\beta$   | -3366.2099               | -3366.1635 | -3366.2236 |
|            | $\alpha\alpha\beta\alpha\beta$   | -3366.2198               | -3366.1747 | -3366.1870 |
|            | $\alpha\beta\alpha\alpha\beta$   | -3366.2195               | -3366.1739 | -3366.1859 |
|            | $\beta\alpha\alpha\alpha\beta$   | -3366.2196               | -3366.1737 | -3366.1857 |
| octet      | $\alpha\alpha\alpha\beta\alpha$  | -3366.2206               | -3366.1747 | -3366.1867 |
|            | $\alpha\alpha\beta\alpha\alpha$  | -3366.2106               | -3366.1638 | -3366.2226 |
|            | $\alpha\beta\alpha\alpha\alpha$  | -3366.2091               | -3366.1612 | -3366.2226 |
|            | $\beta\alpha\alpha\alpha\alpha$  | -3366.2088               | -3366.1611 | -3366.2224 |
| 12-et      | $\alpha\alpha\alpha\alpha\beta$  | -3366.2208               | -3366.1746 | -3366.1865 |
| 14-et      | $\alpha\alpha\alpha\alpha\alpha$ | -3366.2100               | -3366.1619 | -3366.2231 |

| Spin state | Spin topology<br>(Mn1~Mn4-O7)  | Relative Gibbs Free energy (kcal/mol) |                            |                        |                        |
|------------|--------------------------------|---------------------------------------|----------------------------|------------------------|------------------------|
|            |                                | $\Delta G^\ddagger(\text{Rea-TS})$    | $\Delta G(\text{Rea-Pro})$ | $\Delta G(\text{Rea})$ | $\Delta G(\text{Pro})$ |
| doublet    | $\alpha\alpha\beta\alpha$      | 28.6                                  | 20.8                       | 1.5                    | 24.1                   |
|            | $\alpha\beta\alpha\beta$       | 28.4                                  | 20.8                       | 1.3                    | 23.8                   |
|            | $\alpha\beta\beta\alpha$       | 29.1                                  | -7.9                       | 7.8                    | 1.6                    |
|            | $\beta\alpha\alpha\beta$       | 28.7                                  | 21.1                       | 1.2                    | 24.0                   |
|            | $\beta\alpha\beta\alpha$       | 29.0                                  | -7.8                       | 7.7                    | 1.6                    |
|            | $\beta\beta\alpha\alpha$       | 30.2                                  | -8.4                       | 7.9                    | 1.3                    |
| sextet     | $\alpha\alpha\alpha\beta\beta$ | 29.1                                  | -8.6                       | 6.8                    | 0.0                    |
|            | $\alpha\alpha\beta\alpha\beta$ | 28.3                                  | 20.6                       | 0.6                    | 23.0                   |
|            | $\alpha\beta\alpha\alpha\beta$ | 28.6                                  | 21.1                       | 0.8                    | 23.7                   |
|            | $\beta\alpha\alpha\alpha\beta$ | 28.8                                  | 21.3                       | 0.8                    | 23.8                   |



|       |                            |      |      |     |      |
|-------|----------------------------|------|------|-----|------|
| octet | $\alpha\alpha\beta\alpha$  | 28.8 | 21.3 | 0.1 | 23.2 |
|       | $\alpha\beta\alpha\alpha$  | 29.4 | -7.5 | 6.4 | 0.6  |
|       | $\alpha\beta\alpha\alpha$  | 30.1 | -8.5 | 7.3 | 0.6  |
|       | $\beta\alpha\alpha\alpha$  | 29.9 | -8.5 | 7.5 | 0.8  |
| 12-et | $\alpha\alpha\alpha\beta$  | 29.0 | 21.5 | 0.0 | 23.3 |
| 14-et | $\alpha\alpha\alpha\alpha$ | 30.2 | -8.2 | 6.8 | 0.3  |

| Spin state | Spin topology |       | Mulliken spin density |       |       |
|------------|---------------|-------|-----------------------|-------|-------|
|            | (Mn1~Mn4-O7)  |       | Rea                   | TS    | Pro   |
| doublet    | $\alpha$      | Mn1   | 2.96                  | 2.96  | 2.95  |
|            | $\alpha$      | Mn2   | 2.94                  | 2.95  | 2.95  |
|            | $\beta$       | Mn3   | -2.88                 | -2.79 | -2.83 |
|            | $\beta$       | Mn4   | -2.69                 | -2.47 | -1.94 |
|            | $\alpha$      | O7    | 0.73                  | 0.03  | -0.06 |
|            |               | O8    | 0.00                  | 0.44  | -0.02 |
|            | $\alpha$      | Mn1   | 2.96                  | 2.95  | 2.95  |
|            | $\beta$       | Mn2   | -2.92                 | -2.92 | -2.93 |
|            | $\alpha$      | Mn3   | 2.88                  | 2.78  | 2.80  |
|            | $\beta$       | Mn4   | -2.66                 | -2.47 | -1.93 |
|            | $\alpha$      | O7    | 0.77                  | 0.02  | -0.04 |
|            |               | O8    | 0.00                  | 0.43  | -0.02 |
|            | $\alpha$      | Mn1   | 2.96                  | 2.95  | 2.95  |
|            | $\beta$       | Mn2   | -2.94                 | -2.93 | -2.93 |
|            | $\beta$       | Mn3   | -2.91                 | -2.86 | -2.85 |
|            | $\alpha$      | Mn4   | 2.75                  | 3.32  | 3.92  |
|            | $\alpha$      | O7    | 1.03                  | 0.45  | -0.04 |
|            |               | O8    | 0.01                  | 0.24  | 0.00  |
|            | $\beta$       | Mn1   | -2.96                 | -2.95 | -2.95 |
|            | $\alpha$      | Mn2   | 2.94                  | 2.94  | 2.94  |
|            | $\alpha$      | Mn3   | 2.90                  | 2.82  | 2.84  |
|            | $\beta$       | Mn4   | -2.66                 | -2.47 | -1.92 |
|            | $\alpha$      | O7    | 0.77                  | 0.02  | -0.04 |
|            |               | O8    | 0.00                  | 0.43  | -0.02 |
| $\beta$    | Mn1           | -2.96 | -2.95                 | -2.95 |       |
| $\alpha$   | Mn2           | 2.92  | 2.92                  | 2.93  |       |
| $\beta$    | Mn3           | -2.88 | -2.82                 | -2.81 |       |
| $\alpha$   | Mn4           | 2.75  | 3.31                  | 3.92  |       |
| $\alpha$   | O7            | 1.03  | 0.46                  | -0.04 |       |
|            | O8            | 0.01  | 0.24                  | 0.00  |       |
| $\beta$    | Mn1           | -2.96 | -2.96                 | -2.95 |       |
| $\beta$    | Mn2           | -2.94 | -2.94                 | -2.94 |       |
| $\alpha$   | Mn3           | 2.89  | 2.89                  | 2.84  |       |
| $\alpha$   | Mn4           | 2.79  | 3.32                  | 3.95  |       |
| $\alpha$   | O7            | 1.03  | 0.48                  | -0.02 |       |

|        |          |     |       |       |       |       |
|--------|----------|-----|-------|-------|-------|-------|
|        |          | O8  | 0.01  | 0.26  | 0.00  |       |
| sextet | $\alpha$ | Mn1 | 2.97  | 2.97  | 2.96  |       |
|        | $\alpha$ | Mn2 | 2.96  | 2.95  | 2.95  |       |
|        | $\alpha$ | Mn3 | 2.91  | 2.86  | 2.86  |       |
|        | $\beta$  | Mn4 | -2.75 | -3.30 | -3.92 |       |
|        | $\beta$  | O7  | -1.03 | -0.46 | 0.04  |       |
|        |          |     | O8    | -0.01 | -0.24 | 0.00  |
|        | $\alpha$ | Mn1 | 2.97  | 2.96  | 2.96  |       |
|        | $\alpha$ | Mn2 | 2.94  | 2.95  | 2.95  |       |
|        | $\beta$  | Mn3 | -2.87 | -2.78 | -2.80 |       |
|        | $\alpha$ | Mn4 | 2.66  | 2.47  | 1.93  |       |
|        | $\beta$  | O7  | -0.77 | -0.03 | 0.04  |       |
|        |          |     | O8    | 0.00  | -0.43 | 0.02  |
|        | $\alpha$ | Mn1 | 2.96  | 2.95  | 2.95  |       |
|        | $\beta$  | Mn2 | -2.92 | -2.92 | -2.93 |       |
|        | $\alpha$ | Mn3 | 2.88  | 2.79  | 2.83  |       |
|        | $\alpha$ | Mn4 | 2.69  | 2.47  | 1.94  |       |
|        | $\beta$  | O7  | -0.73 | 0.00  | 0.06  |       |
|        |          |     | O8    | 0.00  | -0.44 | 0.02  |
|        | $\beta$  | Mn1 | -2.95 | -2.95 | -2.95 |       |
|        | $\alpha$ | Mn2 | 2.94  | 2.94  | 2.94  |       |
|        | $\alpha$ | Mn3 | 2.91  | 2.83  | 2.87  |       |
|        | $\alpha$ | Mn4 | 2.69  | 2.47  | 1.94  |       |
|        | $\beta$  | O7  | -0.73 | 0.00  | 0.06  |       |
|        |          |     | O8    | 0.00  | -0.44 | 0.02  |
| octet  | $\alpha$ | Mn1 | 2.97  | 2.96  | 2.96  |       |
|        | $\alpha$ | Mn2 | 2.96  | 2.96  | 2.96  |       |
|        | $\alpha$ | Mn3 | 2.91  | 2.83  | 2.85  |       |
|        | $\beta$  | Mn4 | -2.66 | -2.47 | -1.93 |       |
|        | $\alpha$ | O7  | 0.77  | 0.02  | -0.04 |       |
|        |          |     | O8    | 0.00  | 0.43  | -0.02 |
|        | $\alpha$ | Mn1 | 2.97  | 2.96  | 2.96  |       |
|        | $\alpha$ | Mn2 | 2.94  | 2.94  | 2.95  |       |
|        | $\beta$  | Mn3 | -2.88 | -2.82 | -2.81 |       |
|        | $\alpha$ | Mn4 | 2.75  | 3.32  | 3.92  |       |
|        | $\alpha$ | O7  | 1.03  | 0.45  | -0.04 |       |
|        |          |     | O8    | 0.01  | 0.24  | 0.00  |
|        | $\alpha$ | Mn1 | 2.96  | 2.96  | 2.95  |       |
|        | $\beta$  | Mn2 | -2.92 | -2.92 | -2.92 |       |
|        | $\alpha$ | Mn3 | 2.89  | 2.88  | 2.84  |       |
|        | $\alpha$ | Mn4 | 2.79  | 3.33  | 3.95  |       |
|        | $\alpha$ | O7  | 1.03  | 0.47  | -0.02 |       |
|        |          |     | O8    | 0.01  | 0.26  | 0.00  |
|        | $\beta$  | Mn1 | -2.95 | -2.95 | -2.94 |       |

|       |          |     |       |       |       |
|-------|----------|-----|-------|-------|-------|
|       | $\alpha$ | Mn2 | 2.94  | 2.93  | 2.93  |
|       | $\alpha$ | Mn3 | 2.92  | 2.92  | 2.88  |
|       | $\alpha$ | Mn4 | 2.79  | 3.33  | 3.95  |
|       | $\alpha$ | O7  | 1.03  | 0.47  | -0.02 |
|       |          | O8  | 0.01  | 0.26  | 0.00  |
| 12-et | $\alpha$ | Mn1 | 2.97  | 2.96  | 2.96  |
|       | $\alpha$ | Mn2 | 2.96  | 2.96  | 2.96  |
|       | $\alpha$ | Mn3 | 2.92  | 2.84  | 2.88  |
|       | $\alpha$ | Mn4 | 2.69  | 2.47  | 1.94  |
|       | $\beta$  | O7  | -0.73 | 0.00  | 0.06  |
|       |          | O8  | 0.00  | -0.43 | 0.02  |
| 14-et | $\alpha$ | Mn1 | 2.97  | 2.97  | 2.96  |
|       | $\alpha$ | Mn2 | 2.96  | 2.95  | 2.95  |
|       | $\alpha$ | Mn3 | 2.93  | 2.93  | 2.89  |
|       | $\alpha$ | Mn4 | 2.79  | 3.34  | 3.94  |
|       | $\alpha$ | O7  | 1.03  | 0.46  | -0.02 |
|       |          | O8  | 0.01  | 0.25  | 0.00  |

**Rea:**

|    |             |             |             |   |             |             |             |
|----|-------------|-------------|-------------|---|-------------|-------------|-------------|
| Ca | 2.28609300  | 0.66174400  | -1.27110800 | C | 5.93340100  | -1.56863300 | -3.82499200 |
| Mn | -0.43969500 | 1.88817300  | 0.25669300  | H | 6.28688500  | -1.04821000 | -2.92689500 |
| Mn | 1.48790500  | 0.71297500  | 1.85812300  | H | 5.52835800  | -0.81352400 | -4.50829400 |
| Mn | 0.53504900  | -1.56655300 | 0.47403600  | H | 6.79552300  | -2.04535400 | -4.30822300 |
| Mn | 0.93222700  | -2.92587900 | -1.83412900 | O | -0.61744900 | 3.75959600  | -0.33568800 |
| O  | 1.33179900  | 2.01410200  | 0.59166700  | C | -0.31618000 | 4.35981100  | -1.43408400 |
| O  | -0.21453600 | 0.25704600  | 1.13602300  | O | 0.07786700  | 3.79196600  | -2.48546800 |
| O  | 2.06677800  | -0.64925900 | 0.80703200  | C | -0.50387700 | 5.87294200  | -1.39569800 |
| O  | 0.68782900  | -1.23642900 | -1.33597100 | H | -1.56816800 | 6.05805500  | -1.18234200 |
| O  | 1.18823500  | -3.13813200 | -0.01359100 | H | 0.03756600  | 6.24803900  | -0.51446800 |
| O  | 2.46716400  | 2.53631500  | -2.79292700 | C | -0.06912400 | 6.60632400  | -2.66735700 |
| H  | 3.23287400  | 3.11258300  | -2.94147100 | H | -0.60879700 | 6.18847800  | -3.52751300 |
| H  | 1.66248200  | 3.11610800  | -2.78725500 | H | 0.99584600  | 6.40750900  | -2.85450600 |
| O  | -1.54775700 | -0.63092900 | -3.17219000 | C | -0.30723900 | 8.11775400  | -2.57788500 |
| H  | -0.94439300 | -1.28250700 | -3.58075100 | H | -1.37148300 | 8.34565500  | -2.42456900 |
| H  | -0.98552700 | -0.23547100 | -2.47435200 | H | 0.24942000  | 8.56277600  | -1.74114000 |
| O  | 0.56018200  | -2.80453200 | -3.62747700 | H | 0.01227100  | 8.62456900  | -3.49765200 |
| O  | 1.34315700  | -5.04880200 | -1.82208300 | N | -2.47784600 | 1.59400200  | -0.04195200 |
| H  | 2.25062700  | -4.98968000 | -2.18408700 | C | -3.11501100 | 1.31466300  | -1.23418500 |
| H  | 1.45408200  | -5.10221400 | -0.84902900 | H | -2.58236000 | 1.28017400  | -2.17320100 |
| O  | 3.48926700  | -0.81636000 | -2.66123600 | C | -4.43695600 | 1.03868400  | -0.98794200 |
| C  | 3.62947200  | -2.04196200 | -2.80763100 | N | -4.58969700 | 1.17181100  | 0.38786800  |
| O  | 2.77773200  | -2.94841100 | -2.42984900 | H | -5.39083900 | 0.80414600  | 0.90760800  |
| C  | 4.87555500  | -2.61408200 | -3.47509900 | C | -3.38708600 | 1.48699200  | 0.91884400  |
| H  | 5.28279000  | -3.38543400 | -2.80559300 | H | -3.19409700 | 1.61941000  | 1.97273400  |
| H  | 4.53582600  | -3.15144400 | -4.37325900 | C | -5.53865200 | 0.67629400  | -1.94734000 |

|   |             |             |             |   |             |             |             |
|---|-------------|-------------|-------------|---|-------------|-------------|-------------|
| H | -5.87889900 | 1.57171000  | -2.48911200 | C | -0.02062700 | 3.37070300  | 5.52854400  |
| H | -5.10577400 | 0.01391700  | -2.70934200 | H | -0.37982300 | 4.08985600  | 6.27554500  |
| C | -6.79184900 | 0.01414600  | -1.32023000 | H | -0.23014200 | 2.35926100  | 5.89745100  |
| H | -7.37194800 | 0.75316800  | -0.75589500 | H | 1.06665600  | 3.47078900  | 5.44246600  |
| H | -7.43397700 | -0.35294600 | -2.13252600 | O | 4.13176300  | 1.32323100  | 0.15592800  |
| C | -6.44893600 | -1.10492400 | -0.34059100 | C | 4.23438000  | 1.42437300  | 1.39517900  |
| O | -6.41418900 | -0.89970800 | 0.88036600  | O | 3.28735100  | 1.22574900  | 2.26195000  |
| N | -6.13095300 | -2.30800400 | -0.88520000 | C | 5.56047900  | 1.81129000  | 2.02761100  |
| H | -6.11864700 | -2.39042900 | -1.89455900 | H | 6.31305800  | 1.99150100  | 1.25533600  |
| C | -5.54362900 | -3.38931700 | -0.08969200 | H | 5.89623400  | 1.00769000  | 2.69495500  |
| H | -6.09099000 | -3.42814100 | 0.85779500  | H | 5.42929400  | 2.71001500  | 2.64272900  |
| H | -5.72728500 | -4.32914300 | -0.62614900 | O | 1.38165400  | -0.51712300 | 3.40739800  |
| C | -4.04411000 | -3.19453700 | 0.18930300  | C | 0.81907100  | -1.65563300 | 3.37209900  |
| H | -3.90170500 | -2.26248700 | 0.74727200  | O | 0.31918200  | -2.19763100 | 2.33815900  |
| H | -3.71116700 | -4.00931400 | 0.84870300  | C | 0.71635000  | -2.42215100 | 4.68070500  |
| C | -3.18955300 | -3.17483200 | -1.08178800 | H | 1.33418200  | -1.90843600 | 5.42650700  |
| H | -3.50984200 | -2.37244500 | -1.76510200 | H | -0.33103300 | -2.34534500 | 5.01467900  |
| H | -3.26301000 | -4.11646700 | -1.64100900 | C | 1.10545000  | -3.90373200 | 4.55310100  |
| C | -1.71889700 | -2.88468700 | -0.84534100 | H | 2.14598400  | -3.97361600 | 4.20274200  |
| O | -1.38216100 | -2.18636000 | 0.14550400  | H | 0.48447000  | -4.36691000 | 3.77598100  |
| O | -0.92311400 | -3.37832400 | -1.72443600 | C | 0.95333700  | -4.65889500 | 5.87749000  |
| O | -0.98564300 | 2.69247700  | 2.01202700  | H | 1.58553600  | -4.22255800 | 6.66336700  |
| C | -0.25510600 | 2.69686000  | 3.05863500  | H | 1.23985500  | -5.71269900 | 5.76611400  |
| O | 0.79779800  | 2.01948500  | 3.22429400  | H | -0.08600900 | -4.63129700 | 6.23436300  |
| C | -0.70297700 | 3.62104800  | 4.18342000  | O | -0.12004500 | 1.31659800  | -1.46206200 |
| H | -1.79561100 | 3.53883600  | 4.26000600  | H | -0.19886200 | 2.13133500  | -2.02842200 |
| H | -0.50798300 | 4.64553800  | 3.83000200  |   |             |             |             |

**TS:**

|    |             |             |             |   |             |             |             |
|----|-------------|-------------|-------------|---|-------------|-------------|-------------|
| Ca | 2.48395000  | -0.48435500 | -0.96701800 | O | -0.25142300 | -2.36043800 | -3.65894900 |
| Mn | 0.42902800  | 1.92379500  | 0.17982900  | O | -0.83397400 | -5.07988200 | -2.09418700 |
| Mn | 1.38903800  | 0.07270000  | 1.99480000  | H | 0.08871700  | -5.40455600 | -2.16808300 |
| Mn | -0.33712600 | -1.58833200 | 0.45804600  | H | -1.08976000 | -5.21864100 | -1.16082300 |
| Mn | -0.24036200 | -2.97639500 | -1.89035700 | O | 3.04106600  | -2.34425800 | -2.30285100 |
| O  | 2.00407500  | 1.25783500  | 0.74092400  | C | 2.68299200  | -3.52247800 | -2.52681300 |
| O  | -0.22743600 | 0.42700500  | 1.06546700  | O | 1.49916600  | -3.98612500 | -2.32502800 |
| O  | 1.41276900  | -1.43190400 | 1.00314700  | C | 3.68116600  | -4.53502900 | -3.08554300 |
| O  | 0.15202800  | -1.29473400 | -1.30078700 | H | 3.64691700  | -5.42064600 | -2.43483100 |
| O  | -0.31452500 | -3.27162400 | -0.04667400 | H | 3.28569300  | -4.86859900 | -4.05680800 |
| O  | 3.63715700  | 1.03848300  | -2.46711700 | C | 5.10857100  | -4.00804500 | -3.22586300 |
| H  | 4.59666600  | 1.14363900  | -2.56282900 | H | 5.51089600  | -3.69474200 | -2.25498300 |
| H  | 3.23858200  | 1.94693900  | -2.49072300 | H | 5.14321200  | -3.13953600 | -3.89385500 |
| O  | -0.68437000 | -0.62058100 | -3.56637600 | H | 5.76643000  | -4.78517600 | -3.63591100 |
| H  | 0.11125000  | -0.34998500 | -4.06499600 | O | 1.17846800  | 3.67545000  | -0.38682000 |
| H  | -0.40225900 | -0.58426500 | -2.56630600 | C | 1.90204200  | 4.03411200  | -1.38589000 |

|   |             |             |             |   |             |             |             |
|---|-------------|-------------|-------------|---|-------------|-------------|-------------|
| O | 2.16539700  | 3.31459200  | -2.38686100 | H | -4.83357500 | -2.62640300 | -1.41823700 |
| C | 2.44032900  | 5.45880400  | -1.29934500 | C | -2.87357400 | -1.93382300 | -0.93936300 |
| H | 1.59000800  | 6.11631800  | -1.06584200 | O | -2.27628400 | -1.35430700 | 0.02650300  |
| H | 3.09093700  | 5.50072000  | -0.41156900 | O | -2.34198500 | -2.65918400 | -1.82384900 |
| C | 3.18715600  | 5.94280300  | -2.54505800 | O | 0.09174200  | 2.97319800  | 1.85502900  |
| H | 2.52044200  | 5.87581600  | -3.41589900 | C | 0.59532600  | 2.68861500  | 2.99476500  |
| H | 4.02271800  | 5.26068600  | -2.75377300 | O | 1.19653600  | 1.62004300  | 3.28853700  |
| C | 3.70750900  | 7.37632500  | -2.39185100 | C | 0.45915300  | 3.76213600  | 4.06780200  |
| H | 2.88507700  | 8.08344300  | -2.21396500 | H | -0.56078300 | 4.16518900  | 4.00226700  |
| H | 4.40390900  | 7.46099900  | -1.54568600 | H | 1.12230900  | 4.58588500  | 3.76133500  |
| H | 4.23895500  | 7.70434300  | -3.29463000 | C | 0.79057800  | 3.29442700  | 5.48509600  |
| N | -1.50060100 | 2.51655200  | -0.37535000 | H | 0.69062100  | 4.12723800  | 6.19279500  |
| C | -2.12587000 | 2.29270300  | -1.58433500 | H | 0.11757600  | 2.48942400  | 5.80432000  |
| H | -1.57768500 | 1.88764900  | -2.42290700 | H | 1.81415500  | 2.90882300  | 5.54221900  |
| C | -3.45606900 | 2.62391800  | -1.47931800 | O | 4.24081300  | -0.63446900 | 0.68657000  |
| N | -3.61671000 | 3.06900800  | -0.17273600 | C | 4.20736000  | -0.53509600 | 1.93074300  |
| H | -4.52874400 | 3.15808500  | 0.28576900  | O | 3.16551700  | -0.24993400 | 2.64930900  |
| C | -2.42616100 | 2.96978000  | 0.45920400  | C | 5.46616200  | -0.76264900 | 2.75111400  |
| H | -2.25644400 | 3.20809500  | 1.49839000  | H | 6.32586000  | -0.92310300 | 2.09494300  |
| C | -4.56219400 | 2.57456100  | -2.50161700 | H | 5.32530400  | -1.63912800 | 3.39650200  |
| H | -4.43334000 | 3.38531100  | -3.23449000 | H | 5.64507000  | 0.09788400  | 3.40691300  |
| H | -4.45824600 | 1.64016600  | -3.07062300 | O | 0.56615600  | -0.91186400 | 3.49608000  |
| C | -6.00607000 | 2.68402400  | -1.94585200 | C | -0.39866400 | -1.72889500 | 3.36994700  |
| H | -6.19390500 | 3.69685900  | -1.57150600 | O | -0.95828200 | -2.04864100 | 2.27666900  |
| H | -6.70762600 | 2.50693200  | -2.77251500 | C | -0.94381400 | -2.36271500 | 4.63971500  |
| C | -6.27065300 | 1.72923200  | -0.78358300 | H | -0.28149700 | -2.09097800 | 5.46986600  |
| O | -6.16053700 | 2.10514100  | 0.39139600  | H | -1.92468100 | -1.90056100 | 4.83506500  |
| N | -6.56707100 | 0.44538400  | -1.11365100 | C | -1.10929500 | -3.88759700 | 4.53107100  |
| H | -6.58872900 | 0.19981600  | -2.09597600 | H | -0.13023800 | -4.34143700 | 4.31749500  |
| C | -6.51431100 | -0.64287500 | -0.13084000 | H | -1.75035300 | -4.11280600 | 3.66939300  |
| H | -6.97201600 | -0.26779800 | 0.78992400  | C | -1.69634300 | -4.49961600 | 5.80705700  |
| H | -7.13888200 | -1.46113400 | -0.51187400 | H | -1.05553800 | -4.30333800 | 6.67800800  |
| C | -5.07801500 | -1.11778500 | 0.15250500  | H | -1.80261700 | -5.58792500 | 5.71010800  |
| H | -4.49865200 | -0.27837100 | 0.55286100  | H | -2.69052300 | -4.08503400 | 6.02663700  |
| H | -5.11219100 | -1.87783600 | 0.94601600  | O | 0.68890200  | 1.23908900  | -1.52044800 |
| C | -4.37595200 | -1.68542600 | -1.08413600 | H | 1.09715500  | 1.99568400  | -2.02054100 |
| H | -4.46889400 | -0.98725900 | -1.93123200 |   |             |             |             |

**Pro:**

|    |             |             |             |   |             |             |             |
|----|-------------|-------------|-------------|---|-------------|-------------|-------------|
| Ca | 2.31062800  | -1.05905500 | -1.02657500 | O | -0.06255200 | 0.59722400  | 1.02764200  |
| Mn | 0.91303900  | 1.87183400  | 0.09557500  | O | 1.07696000  | -1.61485000 | 1.00254100  |
| Mn | 1.44710000  | -0.11763600 | 1.92977400  | O | -0.12125300 | -1.23459000 | -1.33371100 |
| Mn | -0.67159400 | -1.38124800 | 0.49681700  | O | -1.01918100 | -3.02071900 | 0.08131300  |
| Mn | -1.11383400 | -3.05286200 | -1.83216200 | O | 3.66918200  | 0.12576300  | -2.64055500 |
| O  | 2.29214200  | 0.83590400  | 0.61770800  | H | 4.60859600  | 0.01042800  | -2.85161600 |

|   |             |             |             |   |             |             |             |
|---|-------------|-------------|-------------|---|-------------|-------------|-------------|
| H | 3.46999600  | 1.09547800  | -2.70969100 | H | -6.01220900 | 4.04605300  | -2.60100800 |
| O | -1.44585900 | -1.61811300 | -4.06503100 | C | -5.70510600 | 3.12216200  | -0.65167900 |
| H | -0.56114300 | -1.35681600 | -4.38876900 | O | -5.48125000 | 3.41981600  | 0.53021300  |
| H | -0.33393200 | -0.34390300 | -1.68668500 | N | -6.29100900 | 1.95048500  | -1.00679500 |
| O | -1.17292200 | -2.97985100 | -3.67277100 | H | -6.40754100 | 1.75181200  | -1.99293200 |
| O | -2.04714100 | -5.13654900 | -1.29509700 | C | -6.49108300 | 0.85796000  | -0.04771700 |
| H | -1.17622000 | -5.55761400 | -1.44751800 | H | -6.85321400 | 1.30703200  | 0.88261100  |
| H | -2.03040500 | -4.88804500 | -0.34844900 | H | -7.28526900 | 0.21339000  | -0.44550600 |
| O | 2.26005400  | -3.09914800 | -2.19713500 | C | -5.20432900 | 0.05912700  | 0.22333100  |
| C | 1.66648400  | -4.20318600 | -2.26033300 | H | -4.44467100 | 0.73565500  | 0.63026200  |
| O | 0.41694700  | -4.38673100 | -2.02875900 | H | -5.41602000 | -0.68193100 | 1.00761500  |
| C | 2.43996100  | -5.46279200 | -2.64810100 | C | -4.65572500 | -0.64401600 | -1.02182600 |
| H | 2.20672200  | -6.23380200 | -1.89996400 | H | -4.57257100 | 0.07285700  | -1.85506800 |
| H | 2.00066400  | -5.82610800 | -3.58954800 | H | -5.32327900 | -1.44228200 | -1.37058200 |
| C | 3.94910600  | -5.26839500 | -2.78813600 | C | -3.25913100 | -1.24556100 | -0.87519300 |
| H | 4.39326100  | -4.92878000 | -1.84441900 | O | -2.48556100 | -0.71165800 | -0.00959700 |
| H | 4.17970100  | -4.51624000 | -3.55166800 | O | -2.96999100 | -2.18484700 | -1.66512800 |
| H | 4.43395500  | -6.21043600 | -3.07534900 | O | 0.92623100  | 3.01257600  | 1.73545500  |
| O | 2.05056300  | 3.34553900  | -0.58386000 | C | 1.37974600  | 2.63705700  | 2.87042300  |
| C | 2.76811400  | 3.47665200  | -1.64227200 | O | 1.68994500  | 1.45589300  | 3.18232900  |
| O | 2.76102700  | 2.68789400  | -2.62561800 | C | 1.56940500  | 3.73653500  | 3.90746400  |
| C | 3.66007900  | 4.71356800  | -1.65267900 | H | 0.70379000  | 4.40906000  | 3.83710500  |
| H | 3.01783500  | 5.57957900  | -1.43349400 | H | 2.43244500  | 4.32968100  | 3.56709200  |
| H | 4.33579700  | 4.62892600  | -0.78730400 | C | 1.78322100  | 3.23634400  | 5.33637200  |
| C | 4.45153500  | 4.92802100  | -2.94549900 | H | 1.93570600  | 4.08412100  | 6.01623900  |
| H | 3.75340300  | 4.98996200  | -3.79153100 | H | 0.91677800  | 2.66433000  | 5.69014600  |
| H | 5.07809600  | 4.04593500  | -3.13723000 | H | 2.65758000  | 2.57946600  | 5.39590500  |
| C | 5.32437400  | 6.18677000  | -2.89140500 | O | 4.01347000  | -1.54039700 | 0.61123900  |
| H | 4.71617000  | 7.08841800  | -2.73288800 | C | 4.03024600  | -1.39811600 | 1.85132100  |
| H | 6.05432400  | 6.13297600  | -2.07143400 | O | 3.10213800  | -0.84604200 | 2.57102300  |
| H | 5.88320300  | 6.32252100  | -3.82639400 | C | 5.21115000  | -1.90031300 | 2.66454600  |
| N | -0.84291100 | 2.90923000  | -0.39281200 | H | 5.99907800  | -2.27164100 | 2.00380700  |
| C | -1.52879700 | 2.87996600  | -1.58926300 | H | 4.87640700  | -2.70730300 | 3.32897400  |
| H | -1.08543600 | 2.43888800  | -2.47068500 | H | 5.59701200  | -1.09486000 | 3.30071100  |
| C | -2.77108600 | 3.44412200  | -1.41946700 | O | 0.42448700  | -0.82180800 | 3.47702100  |
| N | -2.81293500 | 3.83121500  | -0.08619000 | C | -0.71409700 | -1.37177000 | 3.38877100  |
| H | -3.67953200 | 4.07233200  | 0.40672000  | O | -1.35246200 | -1.58889200 | 2.30839800  |
| C | -1.64690100 | 3.47631200  | 0.49660600  | C | -1.39000900 | -1.80887800 | 4.67675200  |
| H | -1.41315100 | 3.61457800  | 1.54139900  | H | -0.72328500 | -1.57012500 | 5.51321800  |
| C | -3.89693700 | 3.64746500  | -2.40088200 | H | -2.30345100 | -1.20470300 | 4.78929300  |
| H | -3.62618200 | 4.43040200  | -3.12499900 | C | -1.76333200 | -3.30251600 | 4.67147600  |
| H | -4.00909100 | 2.72503700  | -2.98791200 | H | -0.85065600 | -3.90083300 | 4.53341300  |
| C | -5.26824100 | 4.03931100  | -1.79274600 | H | -2.40320100 | -3.50322000 | 3.80264600  |
| H | -5.22564000 | 5.05454900  | -1.38188500 | C | -2.47020500 | -3.72690800 | 5.96268300  |

|   |             |             |            |   |            |            |             |
|---|-------------|-------------|------------|---|------------|------------|-------------|
| H | -1.83543700 | -3.55393700 | 6.84283600 | O | 0.88317600 | 1.09342800 | -1.58096800 |
| H | -2.72473900 | -4.79439000 | 5.93958600 | H | 1.42032300 | 1.69751100 | -2.16096800 |
| H | -3.40277700 | -3.16387400 | 6.10941500 |   |            |            |             |

### W3 (water)-Wx (oxo/oxyl)

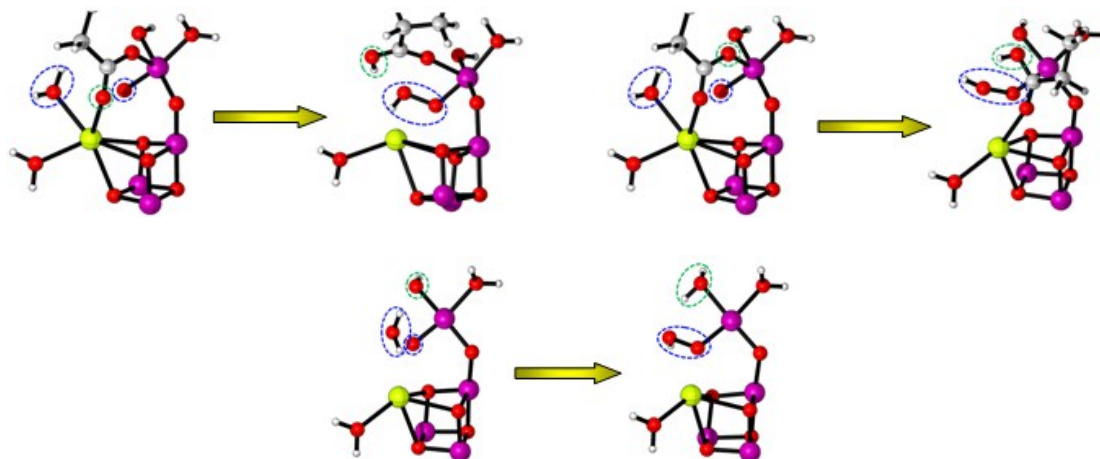

**Fig. S6** Pictorial exhibitions for the closed-cubane water (W3/crystal or solvent water)-Wx (oxo/oxyl) nucleophilic attack with Ca/Mn4-bound O of Asp170 (upper) and W2 (lower) as the proton acceptors.

**Table S7** Reaction parameters for the closed-cubane W3 (water)-Wx (oxo/oxyl) nucleophilic attack with Ca-bound O of Asp170 as the proton acceptor:

| Spin state | Spin topology<br>(Mn1~Mn4-O10)   | Gibbs Free energy (a.u.) |            |            |
|------------|----------------------------------|--------------------------|------------|------------|
|            |                                  | Rea                      | TS         | Pro        |
| doublet    | $\alpha\alpha\beta\alpha$        | -3366.2428               | -3366.1588 | -3366.1590 |
|            | $\alpha\beta\alpha\alpha$        | -3366.2428               | -3366.1588 | -3366.1590 |
|            | $\alpha\beta\beta\alpha\alpha$   | -3366.2091               | -3366.1697 | -3366.2115 |
|            | $\beta\alpha\alpha\beta\alpha$   | -3366.2416               | -3366.1593 | -3366.1597 |
|            | $\beta\alpha\beta\alpha\alpha$   | -3366.2081               | -3366.1691 | -3366.2085 |
|            | $\beta\beta\alpha\alpha\alpha$   | -3366.1899               | -3366.1696 | -3366.2085 |
| sextet     | $\alpha\alpha\alpha\beta\beta$   | -3366.2111               | -3366.1718 | -3366.2132 |
|            | $\alpha\alpha\beta\alpha\beta$   | -3366.2425               | -3366.1605 | -3366.1607 |
|            | $\alpha\beta\alpha\alpha\beta$   | -3366.2430               | -3366.1592 | -3366.1594 |
|            | $\beta\alpha\alpha\alpha\beta$   | -3366.2443               | -3366.1600 | -3366.1602 |
| octet      | $\alpha\alpha\alpha\beta\alpha$  | -3366.2440               | -3366.1617 | -3366.1619 |
|            | $\alpha\alpha\beta\alpha\alpha$  | -3366.2103               | -3366.1712 | -3366.2127 |
|            | $\alpha\beta\alpha\alpha\alpha$  | -3366.1907               | -3366.1702 | -3366.2091 |
|            | $\beta\alpha\alpha\alpha\alpha$  | -3366.1914               | -3366.1710 | -3366.2118 |
| 12-et      | $\alpha\alpha\alpha\alpha\beta$  | -3366.2455               | -3366.1616 | -3366.1618 |
| 14-et      | $\alpha\alpha\alpha\alpha\alpha$ | -3366.1933               | -3366.1729 | -3366.2136 |

| Spin state | Spin topology<br>(Mn1~Mn4-O10)   | Relative Gibbs Free energy (kcal/mol) |       |      |      |
|------------|----------------------------------|---------------------------------------|-------|------|------|
|            |                                  | $\Delta G(\text{Rea-Pro})$            |       |      |      |
|            |                                  | $\Delta G^\ddagger(\text{Rea-TS})$    | Rea   | TS   | Pro  |
| doublet    | $\alpha\alpha\beta\alpha$        | 52.7                                  | 52.6  | 1.7  | 34.3 |
|            | $\alpha\beta\alpha\beta$         | 52.7                                  | 52.6  | 1.7  | 34.3 |
|            | $\alpha\beta\beta\alpha\alpha$   | 24.7                                  | -1.5  | 22.8 | 1.3  |
|            | $\beta\alpha\alpha\beta\alpha$   | 51.6                                  | 51.4  | 2.4  | 33.8 |
|            | $\beta\alpha\beta\alpha\alpha$   | 24.5                                  | -0.3  | 23.5 | 3.2  |
|            | $\beta\beta\alpha\alpha\alpha$   | 12.7                                  | -11.7 | 34.9 | 3.2  |
| sextet     | $\alpha\alpha\alpha\beta\beta$   | 24.7                                  | -1.3  | 21.6 | 0.3  |
|            | $\alpha\alpha\beta\alpha\beta$   | 51.5                                  | 51.3  | 1.9  | 33.2 |
|            | $\alpha\beta\alpha\alpha\beta$   | 52.6                                  | 52.5  | 1.6  | 34.0 |
|            | $\beta\alpha\alpha\alpha\beta$   | 52.9                                  | 52.8  | 0.8  | 33.5 |
| octet      | $\alpha\alpha\alpha\beta\alpha$  | 51.6                                  | 51.5  | 0.9  | 32.4 |
|            | $\alpha\alpha\beta\alpha\alpha$  | 24.5                                  | -1.5  | 22.1 | 0.6  |
|            | $\alpha\beta\alpha\alpha\alpha$  | 12.9                                  | -11.5 | 34.4 | 2.8  |
|            | $\beta\alpha\alpha\alpha\alpha$  | 12.8                                  | -12.8 | 33.9 | 1.1  |
| 12-et      | $\alpha\alpha\alpha\alpha\beta$  | 52.6                                  | 52.5  | 0.0  | 32.5 |
| 14-et      | $\alpha\alpha\alpha\alpha\alpha$ | 12.8                                  | -12.7 | 32.8 | 0.0  |

| Spin state   | Spin topology<br>(Mn1~Mn4-O10) | Mulliken spin density |       |       |  |
|--------------|--------------------------------|-----------------------|-------|-------|--|
|              |                                | Mulliken spin density |       |       |  |
|              |                                | Rea                   | TS    | Pro   |  |
| doublet      | $\alpha$ Mn1                   | 2.92                  | 2.93  | 2.92  |  |
|              | $\alpha$ Mn2                   | 2.93                  | 2.95  | 2.95  |  |
|              | $\beta$ Mn3                    | -2.93                 | -2.84 | -2.83 |  |
|              | $\beta$ Mn4                    | -1.85                 | -2.02 | -1.96 |  |
|              | $\alpha$ O10                   | -0.16                 | 0.00  | 0.00  |  |
|              | O8                             | 0.00                  | 0.08  | 0.03  |  |
|              | $\alpha$ Mn1                   | 2.92                  | 2.93  | 2.92  |  |
|              | $\beta$ Mn2                    | 2.93                  | 2.95  | 2.95  |  |
|              | $\alpha$ Mn3                   | -2.93                 | -2.84 | -2.83 |  |
|              | $\beta$ Mn4                    | -1.85                 | -2.02 | -1.96 |  |
|              | $\alpha$ O10                   | -0.16                 | 0.00  | 0.00  |  |
|              | O8                             | 0.00                  | 0.08  | 0.03  |  |
|              | $\alpha$ Mn1                   | 2.92                  | 2.92  | 2.92  |  |
|              | $\beta$ Mn2                    | -2.93                 | -2.93 | -2.93 |  |
|              | $\beta$ Mn3                    | -2.82                 | -2.82 | -2.82 |  |
|              | $\alpha$ Mn4                   | 2.61                  | 3.25  | 3.82  |  |
|              | $\alpha$ O10                   | 0.85                  | 0.26  | 0.02  |  |
|              | O8                             | 0.00                  | 0.41  | 0.01  |  |
| $\beta$ Mn1  | -2.92                          | -2.92                 | -2.92 |       |  |
| $\alpha$ Mn2 | 2.93                           | 2.93                  | 2.93  |       |  |
| $\alpha$ Mn3 | 2.91                           | 2.80                  | 2.79  |       |  |



|  |          |     |       |       |       |
|--|----------|-----|-------|-------|-------|
|  | $\beta$  | Mn4 | -1.80 | -2.00 | -1.92 |
|  | $\alpha$ | O10 | -0.15 | 0.01  | 0.00  |
|  |          | O8  | 0.00  | 0.09  | 0.02  |
|  | $\beta$  | Mn1 | -2.94 | -2.94 | -2.93 |
|  | $\alpha$ | Mn2 | 2.94  | 2.95  | 2.95  |
|  | $\beta$  | Mn3 | -2.81 | -2.81 | -2.80 |
|  | $\alpha$ | Mn4 | 2.62  | 3.25  | 3.82  |
|  | $\alpha$ | O10 | 0.85  | 0.26  | 0.02  |
|  |          | O8  | 0.00  | 0.41  | 0.01  |
|  | $\beta$  | Mn1 | -2.92 | -2.92 | -2.93 |
|  | $\beta$  | Mn2 | -2.95 | -2.95 | -2.95 |
|  | $\alpha$ | Mn3 | 2.84  | 2.83  | 2.86  |
|  | $\alpha$ | Mn4 | 2.76  | 3.30  | 3.88  |
|  | $\alpha$ | O10 | 0.89  | 0.26  | 0.03  |
|  |          | O8  | 0.00  | 0.41  | 0.01  |
|  | $\alpha$ | Mn1 | 2.94  | 2.94  | 2.93  |
|  | $\alpha$ | Mn2 | 2.93  | 2.93  | 2.93  |
|  | $\alpha$ | Mn3 | 2.84  | 2.84  | 2.83  |
|  | $\beta$  | Mn4 | -2.61 | -3.26 | -3.82 |
|  | $\beta$  | O10 | -0.84 | -0.26 | -0.02 |
|  |          | O8  | 0.00  | -0.41 | -0.01 |
|  | $\alpha$ | Mn1 | 2.92  | 2.92  | 2.92  |
|  | $\alpha$ | Mn2 | 2.93  | 2.96  | 2.96  |
|  | $\beta$  | Mn3 | -2.89 | -2.76 | -2.75 |
|  | $\alpha$ | Mn4 | 1.79  | 2.00  | 1.92  |
|  | $\beta$  | O10 | 0.15  | -0.01 | 0.00  |
|  |          | O8  | 0.00  | -0.09 | -0.02 |
|  | $\alpha$ | Mn1 | 2.94  | 2.94  | 2.94  |
|  | $\beta$  | Mn2 | -2.93 | -2.95 | -2.95 |
|  | $\alpha$ | Mn3 | 2.95  | 2.86  | 2.86  |
|  | $\alpha$ | Mn4 | 1.86  | 2.02  | 1.96  |
|  | $\beta$  | O10 | 0.16  | -0.01 | 0.00  |
|  |          | O8  | 0.00  | -0.08 | -0.03 |
|  | $\beta$  | Mn1 | -2.91 | -2.92 | -2.92 |
|  | $\alpha$ | Mn2 | 2.93  | 2.94  | 2.94  |
|  | $\alpha$ | Mn3 | 2.96  | 2.88  | 2.88  |
|  | $\alpha$ | Mn4 | 1.85  | 2.02  | 1.96  |
|  | $\beta$  | O10 | 0.16  | -0.01 | 0.00  |
|  |          | O8  | 0.00  | -0.08 | -0.03 |
|  | $\alpha$ | Mn1 | 2.93  | 2.94  | 2.94  |
|  | $\alpha$ | Mn2 | 2.3   | 2.93  | 2.93  |
|  | $\alpha$ | Mn3 | 2.87  | 2.81  | 2.81  |
|  | $\beta$  | Mn4 | -1.82 | -2.00 | -1.93 |
|  | $\alpha$ | O10 | -0.13 | 0.01  | 0.00  |

|       |          |     |       |       |       |
|-------|----------|-----|-------|-------|-------|
|       |          | O8  | 0.00  | 0.09  | 0.03  |
|       | $\alpha$ | Mn1 | 2.93  | 2.92  | 2.93  |
|       | $\alpha$ | Mn2 | 2.95  | 2.95  | 2.96  |
|       | $\beta$  | Mn3 | -2.79 | -2.78 | -2.78 |
|       | $\alpha$ | Mn4 | 2.61  | 3.25  | 3.82  |
|       | $\alpha$ | O10 | 0.85  | 0.26  | 0.02  |
|       |          | O8  | 0.00  | 0.41  | 0.01  |
|       | $\alpha$ | Mn1 | 2.94  | 2.94  | 2.93  |
|       | $\beta$  | Mn2 | -2.94 | -2.94 | -2.94 |
|       | $\alpha$ | Mn3 | 2.86  | 2.85  | 2.88  |
|       | $\alpha$ | Mn4 | 2.76  | 3.30  | 3.88  |
|       | $\alpha$ | O10 | 0.89  | 0.26  | 0.02  |
|       |          | O8  | 0.00  | 0.41  | 0.01  |
|       | $\beta$  | Mn1 | -2.92 | -2.92 | -2.92 |
|       | $\alpha$ | Mn2 | 2.93  | 2.93  | 2.94  |
|       | $\alpha$ | Mn3 | 2.88  | 2.88  | 2.90  |
|       | $\alpha$ | Mn4 | 2.76  | 3.29  | 3.88  |
|       | $\alpha$ | O10 | 0.89  | 0.26  | 0.03  |
|       |          | O8  | 0.00  | 0.41  | 0.01  |
| 12-et | $\alpha$ | Mn1 | 2.94  | 2.94  | 2.94  |
|       | $\alpha$ | Mn2 | 2.93  | 2.93  | 2.93  |
|       | $\alpha$ | Mn3 | 2.96  | 2.90  | 2.90  |
|       | $\alpha$ | Mn4 | 1.85  | 2.02  | 1.96  |
|       | $\beta$  | O10 | 0.16  | 0.00  | 0.00  |
|       |          | O8  | 0.00  | -0.08 | -0.03 |
| 14-et | $\alpha$ | Mn1 | 2.94  | 2.94  | 2.94  |
|       | $\alpha$ | Mn2 | 2.93  | 2.93  | 2.93  |
|       | $\alpha$ | Mn3 | 2.89  | 2.89  | 2.91  |
|       | $\alpha$ | Mn4 | 2.76  | 3.30  | 3.88  |
|       | $\alpha$ | O10 | 0.89  | 0.26  | 0.02  |
|       |          | O8  | 0.00  | 0.41  | 0.01  |

**Rea:**

|    |             |             |             |   |             |             |             |
|----|-------------|-------------|-------------|---|-------------|-------------|-------------|
| Ca | -2.50123800 | -0.97394600 | -0.86224400 | H | -3.36096300 | -3.11389100 | -2.48961500 |
| Mn | 0.77340000  | -1.68394200 | -0.44621300 | O | -4.56938500 | 0.09098100  | -1.30429300 |
| Mn | -0.63855300 | -1.93183300 | 1.83920100  | H | -5.24905400 | -0.37746100 | -1.81283100 |
| Mn | -0.24488100 | 0.62853100  | 0.88053200  | H | -4.63365600 | 1.06205100  | -1.53119200 |
| Mn | -1.74904600 | 3.01999700  | -0.87746100 | O | -1.90754300 | 4.03059700  | -2.37533100 |
| O  | -0.72458900 | -2.51809200 | 0.11524600  | H | -1.20658300 | 3.75408000  | -2.99536900 |
| O  | 0.87623100  | -0.95042000 | 1.25219500  | O | -1.16420500 | 4.67646600  | 0.48341200  |
| O  | -1.59994600 | -0.48571700 | 1.38250700  | H | -0.22506900 | 4.78002200  | 0.24511300  |
| O  | -0.12387200 | -0.14025100 | -0.79552300 | H | -1.16743000 | 4.15302600  | 1.30990700  |
| O  | -1.41263700 | 1.89269600  | 0.52964100  | O | -4.98639800 | 2.67710500  | -1.74880900 |
| O  | -4.07414600 | -2.70244800 | -1.96464900 | C | -4.59496500 | 3.53071500  | -0.94896800 |
| H  | -4.13871200 | -3.20666800 | -1.12781300 | O | -3.44416500 | 3.53408000  | -0.31758400 |

|            |             |             |             |    |             |             |             |
|------------|-------------|-------------|-------------|----|-------------|-------------|-------------|
| C          | -5.47274900 | 4.73673000  | -0.61733200 | C  | 3.63147200  | 3.56184100  | 0.02502200  |
| H          | -5.21805900 | 5.50261800  | -1.36729500 | H  | 3.84879900  | 2.68657000  | 0.64570000  |
| H          | -6.51185000 | 4.44242200  | -0.80744700 | H  | 3.18398800  | 4.31643400  | 0.68964200  |
| C          | -5.29378000 | 5.31400300  | 0.79018400  | C  | 2.64198900  | 3.18099500  | -1.08454500 |
| H          | -4.25794900 | 5.63149400  | 0.94999400  | H  | 3.07042500  | 2.37448900  | -1.69836500 |
| H          | -5.54186100 | 4.57107200  | 1.55939500  | H  | 2.44477700  | 4.03030900  | -1.75104500 |
| H          | -5.95158500 | 6.18116900  | 0.93362200  | C  | 1.29302000  | 2.65893700  | -0.58664000 |
| O          | 0.73106500  | -2.36895500 | -2.25238800 | O  | 1.30497700  | 1.85231000  | 0.39215100  |
| C          | -0.30564300 | -2.56216900 | -3.00409600 | O  | 0.28223200  | 3.10173200  | -1.22089200 |
| O          | -1.47286000 | -2.21194500 | -2.73205400 | O  | 1.78455900  | -3.30827500 | 0.28893500  |
| C          | 0.00945900  | -3.26293700 | -4.32291100 | C  | 1.49361500  | -3.85184900 | 1.40474400  |
| H          | 0.63129400  | -2.56861500 | -4.91124700 | O  | 0.61802500  | -3.45438000 | 2.23811700  |
| H          | 0.66070300  | -4.11982700 | -4.09849900 | C  | 2.27257500  | -5.11572700 | 1.75441000  |
| C          | -1.21636700 | -3.69253900 | -5.13297600 | H  | 3.31433000  | -4.95386600 | 1.44724400  |
| H          | -1.85817400 | -2.81861700 | -5.30607600 | H  | 1.88676300  | -5.90459700 | 1.08968500  |
| H          | -1.81433200 | -4.39832100 | -4.53742900 | H  | -3.71745600 | -5.07040900 | 2.65860800  |
| C          | -0.83667100 | -4.34108600 | -6.46876700 | C  | 2.17439100  | -5.54890200 | 3.21769900  |
| H          | -0.26685400 | -3.64589600 | -7.10141100 | H  | 2.74400300  | -6.47293800 | 3.37980300  |
| H          | -1.72980200 | -4.64493000 | -7.02968300 | H  | 2.57500600  | -4.77805200 | 3.88758800  |
| H          | -0.21642800 | -5.23587700 | -6.31841600 | H  | 1.13286500  | -5.72598100 | 3.50663200  |
| N          | 2.67370400  | -0.95418200 | -0.86249500 | O  | -3.54104200 | -2.66908000 | 0.70599800  |
| C          | 3.26840100  | -0.60999600 | -2.05508400 | C  | -3.23433400 | -3.15271700 | 1.81368000  |
| H          | 2.73689500  | -0.71847500 | -2.99046500 | O  | -2.12287500 | -2.93955100 | 2.44958900  |
| C          | 4.54799300  | -0.16239200 | -1.81419600 | C  | -4.18444800 | -4.08365800 | 2.54552500  |
| N          | 4.71366600  | -0.27232700 | -0.43793200 | H  | -5.12624500 | -4.17784400 | 1.99825100  |
| H          | 5.48844000  | 0.13938700  | 0.08768700  | H  | -4.37451000 | -3.69769500 | 3.55417200  |
| C          | 3.56033900  | -0.73054200 | 0.09571300  | O  | -0.32207500 | -1.06291900 | 3.61558600  |
| H          | 3.37535600  | -0.86165000 | 1.15214900  | C  | -0.08788700 | 0.18157600  | 3.75152900  |
| C          | 5.60084400  | 0.36141300  | -2.75684600 | O  | 0.01523000  | 1.05058200  | 2.82124000  |
| H          | 6.05502300  | -0.46642800 | -3.32165300 | C  | 0.08406900  | 0.69392400  | 5.17401700  |
| H          | 5.09770700  | 0.98868700  | -3.50608400 | H  | -0.79171100 | 1.32313500  | 5.39774600  |
| C          | 6.75725400  | 1.16160700  | -2.09974900 | H  | 0.05665100  | -0.16566700 | 5.85346600  |
| H          | 7.45954200  | 0.48085800  | -1.60660800 | C  | 1.36836000  | 1.51683700  | 5.37191200  |
| H          | 7.31198000  | 1.68413800  | -2.89111100 | H  | 1.37096300  | 2.34793900  | 4.65484800  |
| C          | 6.28984000  | 2.13821800  | -1.02030500 | H  | 2.23935900  | 0.88991900  | 5.12749400  |
| O          | 6.42592900  | 1.87358800  | 0.18163300  | C  | 1.50243500  | 2.04979500  | 6.80212700  |
| N          | 5.65672100  | 3.26187400  | -1.44272900 | H  | 0.65942900  | 2.70515300  | 7.06251300  |
| H          | 5.53635600  | 3.40743100  | -2.43759000 | H  | 2.42657300  | 2.62989500  | 6.92311900  |
| C          | 4.94916500  | 4.14926300  | -0.51367000 | H  | 1.52400400  | 1.23068900  | 7.53420100  |
| H          | 5.62289400  | 4.36230000  | 0.32361200  | O  | -2.06982000 | 1.53722600  | -1.70288800 |
| H          | 4.76547000  | 5.09028100  | -1.04704300 |    |             |             |             |
| <b>TS:</b> |             |             |             |    |             |             |             |
| Ca         | 2.31679500  | 1.06385600  | -0.99804600 | Mn | 0.64276100  | 1.93166500  | 1.83655500  |
| Mn         | -0.89710400 | 1.64491100  | -0.35353800 | Mn | 0.27330200  | -0.64571900 | 0.90835400  |

|    |             |             |             |   |             |             |             |
|----|-------------|-------------|-------------|---|-------------|-------------|-------------|
| Mn | 1.82272500  | -2.72443900 | -1.01815200 | N | -4.72978400 | -0.04314000 | -0.17223400 |
| O  | 0.60890900  | 2.52942100  | 0.11232500  | H | -5.42693200 | -0.56236300 | 0.36579000  |
| O  | -0.87994600 | 0.92153600  | 1.34170000  | C | -3.57924500 | 0.46706500  | 0.32124100  |
| O  | 1.61762100  | 0.51639100  | 1.32303900  | H | -3.32725100 | 0.53010500  | 1.37026400  |
| O  | 0.02447700  | 0.13608500  | -0.76711500 | C | -5.73004500 | -0.55580100 | -2.47697400 |
| O  | 1.42769900  | -1.91683600 | 0.58445300  | H | -6.29061700 | 0.27751600  | -2.92666000 |
| O  | 3.79884800  | 2.79650600  | -2.13110100 | H | -5.23499200 | -1.06517500 | -3.31566700 |
| H  | 3.97499600  | 3.27676200  | -1.29702700 | C | -6.76519100 | -1.51050900 | -1.82550500 |
| H  | 3.05663900  | 3.25265000  | -2.57272000 | H | -7.48045600 | -0.94174100 | -1.22155800 |
| O  | 3.86860500  | -0.39119100 | -2.29685200 | H | -7.33468600 | -2.00452900 | -2.62472800 |
| H  | 3.69838900  | -0.35456100 | -3.25695700 | C | -6.14138100 | -2.53749700 | -0.88056900 |
| H  | 4.70130100  | -1.67844800 | -2.03332100 | O | -6.20941600 | -2.39757200 | 0.34758200  |
| O  | 2.19305300  | -3.89752900 | -2.36496800 | N | -5.45564400 | -3.55957400 | -1.45310500 |
| H  | 2.13458600  | -3.40604400 | -3.20390500 | H | -5.40176300 | -3.60435400 | -2.46319500 |
| O  | 1.55002600  | -4.53501400 | 0.38453300  | C | -4.63300200 | -4.48213900 | -0.66339400 |
| H  | 0.67448300  | -4.86523200 | 0.11686700  | H | -5.24343200 | -4.84393300 | 0.17174900  |
| H  | 1.38138800  | -3.86942600 | 1.08940500  | H | -4.40321500 | -5.33893500 | -1.30899200 |
| O  | 5.30884200  | -2.49134600 | -1.85591700 | C | -3.34272600 | -3.84891300 | -0.11300300 |
| C  | 4.83327500  | -3.22314000 | -0.88167100 | H | -3.60247900 | -3.05219400 | 0.59116600  |
| O  | 3.76342000  | -2.98592800 | -0.29362700 | H | -2.81788700 | -4.62333000 | 0.46660100  |
| C  | 5.69592100  | -4.40589700 | -0.50571600 | C | -2.41960500 | -3.29458700 | -1.20612200 |
| H  | 5.60994700  | -5.11234900 | -1.34668600 | H | -2.94284500 | -2.50518200 | -1.76699100 |
| H  | 6.74331800  | -4.07588700 | -0.49652500 | H | -2.13264000 | -4.07153000 | -1.92541800 |
| C  | 5.28563000  | -5.07741000 | 0.80513800  | C | -1.13988200 | -2.64891000 | -0.67286700 |
| H  | 4.23417500  | -5.38160300 | 0.77079000  | O | -1.22762000 | -1.94781100 | 0.37181600  |
| H  | 5.40850700  | -4.39415100 | 1.65451200  | O | -0.09932800 | -2.89900900 | -1.38098400 |
| H  | 5.90650300  | -5.96338300 | 0.98644800  | O | -1.91157000 | 3.24151600  | 0.44465900  |
| O  | -1.00085600 | 2.35829600  | -2.15770300 | C | -1.56485200 | 3.79458900  | 1.53929500  |
| C  | -0.02742100 | 2.63965000  | -2.96033200 | O | -0.62163200 | 3.43015000  | 2.31209500  |
| O  | 1.17130200  | 2.33303400  | -2.78275400 | C | -2.36339700 | 5.03066200  | 1.94285500  |
| C  | -0.45831700 | 3.39124800  | -4.21790900 | H | -3.41923700 | 4.82373500  | 1.72283900  |
| H  | -1.09133100 | 2.70237000  | -4.80071900 | H | -2.06589600 | 5.82813100  | 1.24398000  |
| H  | -1.12570000 | 4.20708300  | -3.90525900 | H | 3.83006300  | 5.01572700  | 2.53652500  |
| C  | 0.69058700  | 3.91559900  | -5.08289600 | C | -2.16573500 | 5.48137400  | 3.39062200  |
| H  | 1.35166000  | 3.08036900  | -5.35006000 | H | -2.75814100 | 6.38299200  | 3.59308200  |
| H  | 1.30218200  | 4.61077200  | -4.48901900 | H | -2.47836400 | 4.70081700  | 4.09514900  |
| C  | 0.19452800  | 4.62098200  | -6.35003800 | H | -1.11245100 | 5.70330900  | 3.59333400  |
| H  | -0.39218300 | 3.93937600  | -6.98213000 | O | 3.51776800  | 2.62259500  | 0.56833000  |
| H  | 1.03388800  | 4.99281700  | -6.95174100 | C | 3.25633500  | 3.12520500  | 1.68249200  |
| H  | -0.44687900 | 5.47933400  | -6.10568700 | O | 2.15778500  | 2.96418500  | 2.34935300  |
| N  | -2.78449000 | 0.83737900  | -0.67122600 | C | 4.26598500  | 4.02113100  | 2.37911000  |
| C  | -3.43526200 | 0.53857300  | -1.84662600 | H | 5.18099500  | 4.10343000  | 1.78621800  |
| H  | -2.98192900 | 0.76506300  | -2.80165300 | H | 4.49877600  | 3.60988100  | 3.36892200  |
| C  | -4.65519700 | -0.03074000 | -1.56093000 | O | 0.45169400  | 1.06673000  | 3.63023400  |

|   |             |             |            |   |             |             |             |
|---|-------------|-------------|------------|---|-------------|-------------|-------------|
| C | 0.23249300  | -0.17984100 | 3.78231100 | H | -1.99831000 | -1.00723600 | 5.25957200  |
| O | 0.09135400  | -1.05219200 | 2.86263100 | C | -1.12643500 | -2.10735900 | 6.90934200  |
| C | 0.14134000  | -0.68523100 | 5.21524100 | H | -0.23661200 | -2.71055800 | 7.13830600  |
| H | 1.06111300  | -1.25937800 | 5.41011900 | H | -2.00925800 | -2.73931900 | 7.07226800  |
| H | 0.14672300  | 0.18189100  | 5.88582500 | H | -1.16555200 | -1.28487900 | 7.63705700  |
| C | -1.08242500 | -1.57980000 | 5.47150300 | O | 2.23299400  | -1.22239000 | -1.97693300 |
| H | -1.06528200 | -2.41547500 | 4.76028400 |   |             |             |             |

**Pro:**

|    |             |             |             |   |             |             |             |
|----|-------------|-------------|-------------|---|-------------|-------------|-------------|
| Ca | 2.38035500  | 1.13242000  | -0.73202000 | H | -0.59988200 | 4.58695000  | -3.61846700 |
| Mn | -0.82676600 | 1.66072500  | -0.34822500 | C | 1.23645300  | 4.23477700  | -4.74565100 |
| Mn | 0.53395800  | 1.75998200  | 1.98149500  | H | 1.83732400  | 3.36993700  | -5.05819600 |
| Mn | 0.20080700  | -0.74251100 | 0.83505500  | H | 1.87553200  | 4.82293000  | -4.07120900 |
| Mn | 1.80517600  | -2.64774500 | -1.19606500 | C | 0.85759600  | 5.08033000  | -5.96669900 |
| O  | 0.63409600  | 2.49057300  | 0.31085800  | H | 0.24485700  | 4.50548200  | -6.67543000 |
| O  | -0.95014500 | 0.81678100  | 1.29170500  | H | 1.75088100  | 5.42516100  | -6.50337600 |
| O  | 1.53053100  | 0.37484100  | 1.43802600  | H | 0.27970800  | 5.96865000  | -5.67519000 |
| O  | 0.10404800  | 0.16108000  | -0.79961500 | N | -2.69451500 | 0.93768900  | -0.88050600 |
| O  | 1.38858600  | -1.96425400 | 0.42186400  | C | -3.20370500 | 0.54252500  | -2.09661800 |
| O  | 4.23596200  | 2.48603700  | -1.67333500 | H | -2.60930700 | 0.61509800  | -2.99717600 |
| H  | 4.38937000  | 3.00357200  | -0.85644700 | C | -4.49464800 | 0.09433700  | -1.92636300 |
| H  | 3.71347100  | 3.05358200  | -2.27169600 | N | -4.75438200 | 0.25445300  | -0.56990800 |
| O  | 3.47838800  | -1.15655500 | -2.92943500 | H | -5.56076200 | -0.14608600 | -0.08356900 |
| H  | 2.93514900  | -1.92040000 | -3.32326300 | C | -3.64310200 | 0.74169900  | 0.02274600  |
| H  | 4.72206700  | -1.92549000 | -2.21442800 | H | -3.53302700 | 0.91247000  | 1.08366800  |
| O  | 2.01942400  | -3.22572500 | -2.96074900 | C | -5.48108100 | -0.47046400 | -2.91691700 |
| H  | 1.14023200  | -3.33925100 | -3.36361300 | H | -5.88231500 | 0.33093700  | -3.55518900 |
| O  | 1.42725900  | -4.66181200 | -0.28534900 | H | -4.93246400 | -1.14012700 | -3.59429700 |
| H  | 0.47193600  | -4.65120100 | -0.49066500 | C | -6.69357600 | -1.22673600 | -2.30990100 |
| H  | 1.49029900  | -4.34651600 | 0.63824900  | H | -7.41461300 | -0.51639000 | -1.89101500 |
| O  | 5.49479600  | -2.36543900 | -1.72315200 | H | -7.20282300 | -1.76975300 | -3.11791000 |
| C  | 5.07352500  | -3.20690000 | -0.79427800 | C | -6.31475300 | -2.16969900 | -1.16758900 |
| O  | 3.89174500  | -3.44782300 | -0.53983200 | O | -6.50706900 | -1.85008700 | 0.01328400  |
| C  | 6.21526100  | -3.87613100 | -0.05232600 | N | -5.69464300 | -3.32776200 | -1.50924600 |
| H  | 6.82942100  | -4.39387400 | -0.80375600 | H | -5.51787300 | -3.50916600 | -2.48982300 |
| H  | 6.85692100  | -3.07830000 | 0.34889900  | C | -5.01623400 | -4.16457300 | -0.51236600 |
| C  | 5.75755300  | -4.83278200 | 1.04714600  | H | -5.70032000 | -4.29104400 | 0.33333700  |
| H  | 5.12463900  | -5.62822500 | 0.63706300  | H | -4.85985500 | -5.14909500 | -0.97110400 |
| H  | 5.17311100  | -4.30494500 | 1.81003800  | C | -3.68415300 | -3.56895200 | -0.01943500 |
| H  | 6.62392500  | -5.29550200 | 1.53586800  | H | -3.88031000 | -2.63528700 | 0.51791600  |
| O  | -0.72688800 | 2.50840100  | -2.09208000 | H | -3.25431300 | -4.26729400 | 0.71373600  |
| C  | 0.32089100  | 2.86710700  | -2.76235300 | C | -2.68643900 | -3.31489900 | -1.15369100 |
| O  | 1.49943300  | 2.54524900  | -2.49729000 | H | -3.12257300 | -2.60832500 | -1.87686100 |
| C  | 0.01029500  | 3.74287400  | -3.97293900 | H | -2.46707200 | -4.23706500 | -1.70866900 |
| H  | -0.65414900 | 3.16103300  | -4.63103400 | C | -1.34679100 | -2.69624400 | -0.74153500 |

|   |             |             |             |   |             |             |             |
|---|-------------|-------------|-------------|---|-------------|-------------|-------------|
| O | -1.35211700 | -1.91585300 | 0.26122400  | H | 5.08142300  | 3.90062900  | 2.42570600  |
| O | -0.35404100 | -3.01584600 | -1.46606000 | H | 4.19802100  | 3.43342500  | 3.91701600  |
| O | -1.88841500 | 3.20811900  | 0.49011800  | O | 0.20494300  | 0.77791900  | 3.68370600  |
| C | -1.61804500 | 3.68228900  | 1.64313600  | C | -0.01027000 | -0.47888100 | 3.73056700  |
| O | -0.74867400 | 3.24565700  | 2.46243300  | O | -0.07975700 | -1.28285300 | 2.74458900  |
| C | -2.42049000 | 4.91108500  | 2.06073300  | C | -0.18958400 | -1.08415800 | 5.11582500  |
| H | -3.45497700 | 4.75688400  | 1.72618300  | H | 0.73994600  | -1.62868000 | 5.34731400  |
| H | -2.03481400 | 5.74649700  | 1.45539800  | H | -0.27588000 | -0.26445800 | 5.83862200  |
| H | 3.67243400  | 4.84678900  | 2.99826000  | C | -1.38424900 | -2.04570800 | 5.21705900  |
| C | -2.35178400 | 5.24948000  | 3.55044000  | H | -1.27174200 | -2.83122300 | 4.45904300  |
| H | -2.93629900 | 6.15388300  | 3.76288000  | H | -2.30751000 | -1.50128000 | 4.96708900  |
| H | -2.75243300 | 4.43162700  | 4.16210100  | C | -1.51368700 | -2.66728600 | 6.61154800  |
| H | -1.31738300 | 5.42000900  | 3.86756100  | H | -0.61616900 | -3.24497000 | 6.87404800  |
| O | 3.50737000  | 2.54771400  | 0.96213900  | H | -2.37484800 | -3.34622500 | 6.66395500  |
| C | 3.15947900  | 2.96986800  | 2.08811500  | H | -1.64891000 | -1.89659900 | 7.38314400  |
| O | 2.02372700  | 2.74578700  | 2.66513200  | O | 2.73309200  | -1.01653000 | -1.67665300 |
| C | 4.09985600  | 3.84001000  | 2.90377400  |   |             |             |             |

**Table S8** Reaction parameters for the closed-cubane W3 (water)-Wx (oxo/oxyl) nucleophilic attack with Mn4-bound O of Asp170 as the proton acceptor:

| Spin state | Spin topology<br>(Mn1~Mn4-O10)   | Gibbs Free energy (a.u.) |            |            |
|------------|----------------------------------|--------------------------|------------|------------|
|            |                                  | Rea                      | TS         | Pro        |
| doublet    | $\alpha\alpha\beta\alpha$        | -3366.2421               | -3366.1662 | -3366.1678 |
|            | $\alpha\beta\alpha\beta$         | -3366.2409               | -3366.1659 | -3366.1671 |
|            | $\alpha\beta\beta\alpha\alpha$   | -3366.2112               | -3366.1730 | -3366.2255 |
|            | $\beta\alpha\alpha\beta\alpha$   | -3366.2424               | -3366.1661 | -3366.1674 |
|            | $\beta\alpha\beta\alpha\alpha$   | -3366.2105               | -3366.1743 | -3366.2222 |
|            | $\beta\beta\alpha\alpha\alpha$   | -3366.2113               | -3366.1752 | -3366.2243 |
| sextet     | $\alpha\alpha\alpha\beta\beta$   | -3366.2163               | -3366.1764 | -3366.2254 |
|            | $\alpha\alpha\beta\alpha\beta$   | -3366.2438               | -3366.1676 | -3366.1687 |
|            | $\alpha\beta\alpha\alpha\beta$   | -3366.2417               | -3366.1667 | -3366.1686 |
|            | $\beta\alpha\alpha\alpha\beta$   | -3366.2437               | -3366.1679 | -3366.1658 |
| octet      | $\alpha\alpha\alpha\beta\alpha$  | -3366.2451               | -3366.1691 | -3366.1698 |
|            | $\alpha\alpha\beta\alpha\alpha$  | -3366.2128               | -3366.1766 | -3366.2260 |
|            | $\alpha\beta\alpha\alpha\alpha$  | -3366.2113               | -3366.1753 | -3366.2258 |
|            | $\beta\alpha\alpha\alpha\alpha$  | -3366.2127               | -3366.1765 | -3366.2259 |
| 12-et      | $\alpha\alpha\alpha\alpha\beta$  | -3366.2452               | -3366.1698 | -3366.1712 |
| 14-et      | $\alpha\alpha\alpha\alpha\alpha$ | -3366.2144               | -3366.1782 | -3366.2283 |

  

| Spin state | Spin topology<br>(Mn1~Mn4-O10) | Relative Gibbs Free energy (kcal/mol) |                      |                  |                  |
|------------|--------------------------------|---------------------------------------|----------------------|------------------|------------------|
|            |                                | $\Delta G^\ddagger$ (Rea-TS)          | $\Delta G$ (Rea-Pro) | $\Delta G$ (Rea) | $\Delta G$ (Pro) |
| doublet    | $\alpha\alpha\beta\alpha$      | 47.6                                  | 46.6                 | 1.9              | 38.0             |

|        |                                  |      |      |      |      |
|--------|----------------------------------|------|------|------|------|
|        | $\alpha\beta\alpha\alpha$        | 47.1 | 46.3 | 2.7  | 38.4 |
|        | $\alpha\beta\beta\alpha$         | 24.0 | -9.0 | 21.3 | 1.8  |
|        | $\beta\alpha\beta\alpha$         | 47.9 | 47.1 | 1.8  | 38.2 |
|        | $\beta\alpha\beta\alpha$         | 22.7 | -7.3 | 21.8 | 3.8  |
|        | $\beta\beta\alpha\alpha$         | 22.7 | -8.2 | 21.3 | 2.5  |
| sextet | $\alpha\alpha\alpha\beta\beta$   | 25.0 | -5.7 | 18.1 | 1.8  |
|        | $\alpha\alpha\beta\alpha\beta$   | 47.8 | 47.1 | 0.9  | 37.4 |
|        | $\alpha\beta\alpha\alpha\beta$   | 47.1 | 45.9 | 2.2  | 37.5 |
|        | $\beta\alpha\alpha\alpha\beta$   | 47.6 | 48.9 | 0.9  | 39.2 |
| octet  | $\alpha\alpha\alpha\beta\alpha$  | 47.7 | 47.3 | 0.1  | 36.7 |
|        | $\alpha\alpha\beta\alpha\alpha$  | 22.7 | -8.3 | 20.3 | 1.4  |
|        | $\alpha\beta\alpha\alpha\alpha$  | 22.6 | -9.1 | 21.3 | 1.6  |
|        | $\beta\alpha\alpha\alpha\alpha$  | 22.7 | -8.3 | 20.4 | 1.5  |
| 12-et  | $\alpha\alpha\alpha\alpha\beta$  | 47.3 | 46.4 | 0.0  | 35.8 |
| 14-et  | $\alpha\alpha\alpha\alpha\alpha$ | 22.7 | -8.7 | 19.3 | 0.0  |

| Spin state | Spin topology<br>(Mn1~Mn4-O10) |       | Mulliken spin density |       |       |
|------------|--------------------------------|-------|-----------------------|-------|-------|
|            |                                |       | Rea                   | TS    | Pro   |
| doublet    | $\alpha$                       | Mn1   | 2.92                  | 2.93  | 2.93  |
|            | $\alpha$                       | Mn2   | 2.93                  | 2.95  | 2.95  |
|            | $\beta$                        | Mn3   | -2.90                 | -2.84 | -2.84 |
|            | $\beta$                        | Mn4   | -1.88                 | -2.05 | -1.93 |
|            | $\alpha$                       | O10   | -0.12                 | -0.02 | -0.03 |
|            |                                | O8    | 0.00                  | 0.14  | 0.02  |
|            | $\alpha$                       | Mn1   | 2.92                  | 2.94  | 2.94  |
|            | $\beta$                        | Mn2   | -2.92                 | -2.95 | -2.95 |
|            | $\alpha$                       | Mn3   | 2.89                  | 2.79  | 2.79  |
|            | $\beta$                        | Mn4   | -1.81                 | -2.02 | -1.89 |
|            | $\alpha$                       | O10   | -0.11                 | -0.02 | -0.03 |
|            |                                | O8    | 0.00                  | 0.14  | 0.02  |
|            | $\alpha$                       | Mn1   | 2.92                  | 2.92  | 3.05  |
|            | $\beta$                        | Mn2   | -2.92                 | -2.93 | -2.93 |
|            | $\beta$                        | Mn3   | -2.81                 | -2.80 | -2.86 |
|            | $\alpha$                       | Mn4   | 2.62                  | 2.89  | 3.87  |
|            | $\alpha$                       | O10   | 0.88                  | 0.40  | -0.03 |
|            |                                | O8    | 0.01                  | 0.53  | 0.03  |
|            | $\beta$                        | Mn1   | -2.91                 | -2.92 | -2.92 |
|            | $\alpha$                       | Mn2   | 2.92                  | 2.93  | 2.93  |
|            | $\alpha$                       | Mn3   | 2.89                  | 2.80  | 2.78  |
|            | $\beta$                        | Mn4   | -1.81                 | -2.02 | -1.89 |
|            | $\alpha$                       | O10   | -0.12                 | -0.02 | -0.03 |
|            |                                | O8    | 0.00                  | 0.14  | 0.02  |
| $\beta$    | Mn1                            | -2.92 | -2.93                 | -2.87 |       |
| $\alpha$   | Mn2                            | 2.93  | 2.94                  | 2.94  |       |

|  |          |     |       |       |       |
|--|----------|-----|-------|-------|-------|
|  | $\beta$  | Mn3 | -2.81 | -2.80 | -2.83 |
|  | $\alpha$ | Mn4 | 2.62  | 2.89  | 3.91  |
|  | $\alpha$ | O10 | 0.88  | 0.40  | -0.02 |
|  |          | O8  | 0.01  | 0.53  | 0.03  |
|  | $\beta$  | Mn1 | -2.92 | -2.93 | -2.89 |
|  | $\beta$  | Mn2 | -2.94 | -2.94 | -2.94 |
|  | $\alpha$ | Mn3 | 2.87  | 2.88  | 2.82  |
|  | $\alpha$ | Mn4 | 2.70  | 2.98  | 3.92  |
|  | $\alpha$ | O10 | 0.84  | 0.39  | -0.02 |
|  |          | O8  | 0.01  | 0.55  | 0.03  |
|  | $\alpha$ | Mn1 | 2.92  | 2.93  | 2.88  |
|  | $\alpha$ | Mn2 | 2.93  | 2.93  | 2.93  |
|  | $\alpha$ | Mn3 | 2.83  | 2.82  | 2.87  |
|  | $\beta$  | Mn4 | -2.62 | -2.89 | -3.91 |
|  | $\beta$  | O10 | -0.88 | -0.40 | 0.02  |
|  |          | O8  | -0.01 | -0.52 | -0.03 |
|  | $\alpha$ | Mn1 | 2.92  | 2.93  | 2.93  |
|  | $\alpha$ | Mn2 | 2.93  | 2.95  | 2.95  |
|  | $\beta$  | Mn3 | -2.87 | -2.76 | -2.75 |
|  | $\alpha$ | Mn4 | 1.81  | 2.02  | 1.89  |
|  | $\beta$  | O10 | 0.12  | 0.01  | 0.02  |
|  |          | O8  | 0.00  | -0.14 | -0.02 |
|  | $\alpha$ | Mn1 | 2.92  | 2.94  | 2.94  |
|  | $\beta$  | Mn2 | -2.92 | -2.94 | -2.94 |
|  | $\alpha$ | Mn3 | 2.92  | 2.88  | 2.88  |
|  | $\alpha$ | Mn4 | 1.88  | 2.05  | 1.93  |
|  | $\beta$  | O10 | 0.12  | 0.01  | 0.01  |
|  |          | O8  | 0.00  | -0.14 | -0.03 |
|  | $\beta$  | Mn1 | -2.91 | -2.92 | -2.92 |
|  | $\alpha$ | Mn2 | 2.92  | 2.94  | 2.94  |
|  | $\alpha$ | Mn3 | 2.93  | 2.88  | 2.8   |
|  | $\alpha$ | Mn4 | 1.88  | 2.05  | 1.93  |
|  | $\beta$  | O10 | 0.11  | 0.01  | 0.02  |
|  |          | O8  | 0.00  | -0.14 | -0.01 |
|  | $\alpha$ | Mn1 | 2.92  | 2.93  | 2.93  |
|  | $\alpha$ | Mn2 | 2.92  | 2.93  | 2.93  |
|  | $\alpha$ | Mn3 | 2.90  | 2.82  | 2.81  |
|  | $\beta$  | Mn4 | -1.81 | -2.02 | -1.89 |
|  | $\alpha$ | O10 | -0.12 | -0.01 | 0.00  |
|  |          | O8  | 0.00  | 0.14  | 0.02  |
|  | $\alpha$ | Mn1 | 2.93  | 2.92  | 3.05  |
|  | $\alpha$ | Mn2 | 2.94  | 2.95  | 2.95  |
|  | $\beta$  | Mn3 | -2.78 | -2.77 | -2.83 |
|  | $\alpha$ | Mn4 | 2.62  | 2.89  | 3.87  |



|       |          |     |       |       |       |
|-------|----------|-----|-------|-------|-------|
|       | $\alpha$ | O10 | 0.88  | 0.40  | -0.03 |
|       |          | O8  | 0.01  | 0.53  | 0.03  |
|       | $\alpha$ | Mn1 | 2.93  | 2.93  | 3.04  |
|       | $\beta$  | Mn2 | -2.93 | -2.93 | -2.94 |
|       | $\alpha$ | Mn3 | 2.90  | 2.90  | 2.84  |
|       | $\alpha$ | Mn4 | 2.70  | 2.98  | 3.88  |
|       | $\alpha$ | O10 | 0.85  | 0.38  | -0.02 |
|       |          | O8  | 0.01  | 0.55  | 0.03  |
|       | $\beta$  | Mn1 | -2.91 | -2.92 | -2.88 |
|       | $\alpha$ | Mn2 | 2.93  | 2.93  | 2.93  |
|       | $\alpha$ | Mn3 | 2.91  | 2.91  | 2.85  |
|       | $\alpha$ | Mn4 | 2.70  | 2.98  | 3.92  |
|       | $\alpha$ | O10 | 0.84  | 0.39  | -0.02 |
|       |          | O8  | 0.01  | 0.55  | 0.03  |
| 12-et | $\alpha$ | Mn1 | 2.92  | 2.93  | 2.94  |
|       | $\alpha$ | Mn2 | 2.92  | 2.93  | 2.94  |
|       | $\alpha$ | Mn3 | 2.93  | 2.91  | 2.91  |
|       | $\alpha$ | Mn4 | 1.88  | 2.05  | 1.93  |
|       | $\beta$  | O10 | 0.12  | 0.02  | 0.02  |
|       |          | O8  | 0.00  | -0.13 | -0.02 |
| 14-et | $\alpha$ | Mn1 | 2.93  | 2.93  | 3.03  |
|       | $\alpha$ | Mn2 | 2.93  | 2.93  | 2.94  |
|       | $\alpha$ | Mn3 | 2.92  | 2.93  | 2.87  |
|       | $\alpha$ | Mn4 | 2.70  | 2.98  | 3.88  |
|       | $\alpha$ | O10 | 0.84  | 0.38  | -0.02 |
|       |          | O8  | 0.01  | 0.55  | 0.03  |

**Rea:**

|    |             |             |             |   |             |             |             |
|----|-------------|-------------|-------------|---|-------------|-------------|-------------|
| Ca | 2.68254900  | -0.25683800 | -0.86668700 | H | -0.08496800 | -4.88978600 | -3.07586700 |
| Mn | 0.06721600  | 1.74809200  | -0.31129600 | O | -0.53642300 | -5.36043400 | 0.13644600  |
| Mn | 1.33031600  | 1.08581900  | 1.98960900  | H | -0.72851900 | -5.88329500 | -0.67325000 |
| Mn | -0.11147500 | -0.89184000 | 0.74410400  | H | -1.41887800 | -5.10298200 | 0.46921000  |
| Mn | -0.19019000 | -3.59752400 | -1.11493000 | O | 3.02642200  | -2.65422700 | -0.98880000 |
| O  | 1.73445000  | 1.78350300  | 0.37571300  | C | 2.72865600  | -3.85387200 | -1.09381500 |
| O  | -0.43323500 | 0.93574400  | 1.29082700  | O | 1.55381900  | -4.33278700 | -1.39166300 |
| O  | 1.57216200  | -0.57787100 | 1.33077300  | C | 3.78031100  | -4.94260500 | -0.89052200 |
| O  | 0.20561800  | 0.01655900  | -0.85620400 | H | 3.47954500  | -5.49815600 | 0.01076000  |
| O  | 0.32948200  | -2.49323800 | 0.15674900  | H | 3.68832300  | -5.65855600 | -1.71918400 |
| O  | 4.96962800  | 0.30467700  | -1.76558200 | C | 5.20876700  | -4.41592300 | -0.75786300 |
| H  | 5.30087800  | 0.59360100  | -0.89083400 | H | 5.29693000  | -3.72934500 | 0.09167600  |
| H  | 4.64326200  | 1.11520000  | -2.20800200 | H | 5.51679600  | -3.86776400 | -1.65682700 |
| O  | 2.10461400  | -1.08188600 | -3.18669400 | H | 5.91004700  | -5.24635600 | -0.60620700 |
| H  | 1.22033400  | -1.50135300 | -3.03232300 | O | 0.62800700  | 2.62358400  | -1.93090400 |
| H  | 2.69583100  | -1.84376300 | -3.31174300 | C | 1.79916800  | 2.62539400  | -2.49402900 |
| O  | -0.82620800 | -4.72746600 | -2.46358100 | O | 2.71348900  | 1.81549900  | -2.25405800 |

|   |             |             |             |   |             |             |             |
|---|-------------|-------------|-------------|---|-------------|-------------|-------------|
| C | 1.97608600  | 3.72922600  | -3.53159300 | H | -4.50307000 | -3.31613900 | 0.01649500  |
| H | 1.15701700  | 3.62496500  | -4.25935200 | C | -2.64041400 | -2.27331700 | -0.12194000 |
| H | 1.79221600  | 4.68768200  | -3.02226900 | O | -2.07508600 | -1.23819500 | 0.31665300  |
| C | 3.33348900  | 3.73478700  | -4.23846200 | O | -2.09340300 | -3.33260100 | -0.58742900 |
| H | 3.49691600  | 2.75682000  | -4.71176500 | O | -0.26456900 | 3.52416700  | 0.67156500  |
| H | 4.13030200  | 3.84935500  | -3.48976900 | C | 0.17881400  | 3.74758400  | 1.84639900  |
| C | 3.44236500  | 4.84880500  | -5.28564100 | O | 0.81114500  | 2.93253600  | 2.59233700  |
| H | 2.67584900  | 4.73960300  | -6.06579100 | C | -0.03296300 | 5.14389300  | 2.42270000  |
| H | 4.42308000  | 4.83583400  | -5.77874000 | H | 0.91465900  | 5.68289200  | 2.26463300  |
| H | 3.31116400  | 5.84063900  | -4.83031200 | H | -0.14300300 | 5.03834600  | 3.50880200  |
| N | -1.85749200 | 1.88257300  | -1.03860800 | H | 6.34638800  | 0.95663700  | 2.33777000  |
| C | -2.39817900 | 1.09749900  | -2.03571100 | C | -1.19459500 | 5.92686800  | 1.80849700  |
| H | -1.80381600 | 0.32990700  | -2.51349900 | H | -1.25311100 | 6.93097500  | 2.24703600  |
| C | -3.71274000 | 1.45127500  | -2.22389400 | H | -1.07178300 | 6.02832200  | 0.72463100  |
| N | -3.94740100 | 2.48385100  | -1.32007200 | H | -2.15364200 | 5.42532100  | 1.99619200  |
| H | -4.88260000 | 2.76438700  | -1.01961600 | O | 4.30257400  | 0.48611700  | 0.90333700  |
| C | -2.81297700 | 2.69556300  | -0.61453100 | C | 4.20476300  | 0.96829300  | 2.05033800  |
| H | -2.70387900 | 3.42001700  | 0.17927600  | O | 3.09724700  | 1.24462100  | 2.66785000  |
| C | -4.74243100 | 0.93117100  | -3.19107800 | C | 5.44752300  | 1.29734600  | 2.85889000  |
| H | -4.62738800 | 1.41984300  | -4.17061300 | H | 5.38369400  | 0.82648000  | 3.84690000  |
| H | -4.53012500 | -0.13265100 | -3.36248200 | H | 5.50064300  | 2.38198900  | 3.01904100  |
| C | -6.22477700 | 1.10765400  | -2.75802800 | O | 0.61750500  | 0.24593900  | 3.65782100  |
| H | -6.53495900 | 2.15186200  | -2.87724800 | C | -0.13870300 | -0.77894600 | 3.65061600  |
| H | -6.85707700 | 0.50243800  | -3.42198000 | O | -0.57566800 | -1.39943900 | 2.62561400  |
| C | -6.44580000 | 0.74919400  | -1.29137800 | C | -0.55390800 | -1.32558300 | 5.00871700  |
| O | -6.44599600 | 1.62054300  | -0.41382400 | H | -1.31295700 | -2.10105600 | 4.85162900  |
| N | -6.56180700 | -0.57748700 | -1.00806800 | H | 0.33356300  | -1.81721500 | 5.43817900  |
| H | -6.50132300 | -1.23096700 | -1.77959700 | C | -1.05509900 | -0.23992800 | 5.97499700  |
| C | -6.37181900 | -1.09855800 | 0.34867800  | H | -1.92952000 | 0.26077800  | 5.53244800  |
| H | -6.84145300 | -0.38557700 | 1.03286700  | H | -0.27720200 | 0.52683800  | 6.07840900  |
| H | -6.91527000 | -2.04959000 | 0.42276800  | C | -1.42607100 | -0.81033900 | 7.34774400  |
| C | -4.88425200 | -1.27135900 | 0.70889600  | H | -2.21977900 | -1.56646600 | 7.26771800  |
| H | -4.38386700 | -0.29958600 | 0.63102300  | H | -1.78484600 | -0.02012700 | 8.02001100  |
| H | -4.80997600 | -1.57768200 | 1.76221600  | H | -0.55998000 | -1.28832600 | 7.82673600  |
| C | -4.16804300 | -2.28952000 | -0.18263100 | O | -0.19675000 | -2.34910700 | -2.32869500 |
| H | -4.39881800 | -2.10094800 | -1.24350400 |   |             |             |             |

**TS:**

|    |             |             |             |   |            |             |             |
|----|-------------|-------------|-------------|---|------------|-------------|-------------|
| Ca | 2.59890400  | 0.19892200  | -1.21206900 | O | 1.74797000 | -0.69636200 | 0.90605300  |
| Mn | -0.12037200 | 1.77981300  | 0.03336200  | O | 0.07251700 | 0.26112300  | -0.92625800 |
| Mn | 1.45467700  | 0.74031000  | 1.96916700  | O | 0.52931900 | -2.38867600 | -0.62364400 |
| Mn | 0.04664200  | -1.03575400 | 0.41366700  | O | 4.65174700 | 1.29873900  | -2.18293700 |
| Mn | -0.16942300 | -3.12455100 | -2.07837600 | H | 5.05168200 | 1.44076400  | -1.30039700 |
| O  | 1.61188300  | 1.82647000  | 0.53008300  | H | 4.17805200 | 2.12572300  | -2.40264400 |
| O  | -0.35792300 | 0.57482900  | 1.43097800  | O | 1.97444700 | -0.93537300 | -3.29693700 |

|   |             |             |             |   |             |             |             |
|---|-------------|-------------|-------------|---|-------------|-------------|-------------|
| H | 1.60330300  | -0.62846700 | -4.14141500 | C | -6.65377700 | 0.45609000  | -0.45144900 |
| H | 2.49726500  | -2.41706300 | -3.09964900 | O | -6.58854600 | 1.03253300  | 0.64067800  |
| O | -0.55645800 | -4.36348800 | -3.41062900 | N | -6.64540500 | -0.90067100 | -0.56331200 |
| H | -0.27590400 | -4.01477900 | -4.27386900 | H | -6.65888900 | -1.29925800 | -1.49430900 |
| O | 0.14614600  | -5.17268600 | -1.14226600 | C | -6.24219300 | -1.76416300 | 0.55048600  |
| H | -0.08689100 | -5.50443700 | -2.04446300 | H | -6.68254700 | -1.34370700 | 1.45953800  |
| H | -0.62961700 | -5.34104000 | -0.57856100 | H | -6.68546400 | -2.75449400 | 0.38443000  |
| O | 3.74046200  | -1.99387400 | -1.17514700 | C | -4.71159200 | -1.85166600 | 0.70175600  |
| C | 3.41774100  | -3.11675800 | -1.56542200 | H | -4.31326600 | -0.84725600 | 0.88416800  |
| O | 2.74430300  | -3.32520300 | -2.69520700 | H | -4.47819800 | -2.44723500 | 1.59564100  |
| C | 3.73128200  | -4.38832300 | -0.81208000 | C | -4.03032700 | -2.46150100 | -0.52587000 |
| H | 2.76710600  | -4.88631000 | -0.63425400 | H | -4.39947300 | -1.98412600 | -1.44731400 |
| H | 4.28878900  | -5.05041900 | -1.49130800 | H | -4.25808100 | -3.53047000 | -0.63322900 |
| C | 4.48639400  | -4.14861800 | 0.49419000  | C | -2.51309400 | -2.29938800 | -0.59049300 |
| H | 3.91113600  | -3.49181300 | 1.15681700  | O | -1.95390300 | -1.45605500 | 0.14180300  |
| H | 5.45555400  | -3.66902000 | 0.31175000  | O | -1.96978700 | -3.06690500 | -1.47343400 |
| H | 4.66425100  | -5.09966200 | 1.01180800  | O | -0.45121200 | 3.25071500  | 1.44842700  |
| O | 0.15272800  | 3.06041400  | -1.38905800 | C | 0.11587000  | 3.23823800  | 2.58921200  |
| C | 1.18750000  | 3.21055000  | -2.15163400 | O | 0.88272600  | 2.33195800  | 3.05071900  |
| O | 2.11877200  | 2.38867700  | -2.27978800 | C | -0.10721700 | 4.44052200  | 3.50131400  |
| C | 1.18247200  | 4.51558500  | -2.94377500 | H | 0.78023800  | 5.08143800  | 3.37811800  |
| H | 0.27735300  | 4.50839600  | -3.57117600 | H | -0.07751800 | 4.07956400  | 4.53656300  |
| H | 1.02984800  | 5.33425900  | -2.22491900 | H | 6.44962700  | 1.29216100  | 1.83483700  |
| C | 2.42877400  | 4.75840500  | -3.79829100 | C | -1.37929600 | 5.24036900  | 3.21549200  |
| H | 2.57022100  | 3.90978400  | -4.48146300 | H | -1.44144100 | 6.11086600  | 3.88060800  |
| H | 3.31537200  | 4.77762500  | -3.14787400 | H | -1.39769900 | 5.59328100  | 2.17858600  |
| C | 2.34610600  | 6.06513300  | -4.59529900 | H | -2.27739900 | 4.63011500  | 3.38193300  |
| H | 1.48630800  | 6.06099000  | -5.28007300 | O | 4.31949000  | 0.87793500  | 0.51177800  |
| H | 3.25056900  | 6.22070900  | -5.19749300 | C | 4.30973100  | 1.00996000  | 1.75022600  |
| H | 2.23449700  | 6.93313200  | -3.93040800 | O | 3.26080000  | 0.92854700  | 2.51353000  |
| N | -2.13906100 | 1.91015300  | -0.40807400 | C | 5.59172200  | 1.29484500  | 2.51266300  |
| C | -2.76539400 | 1.40773400  | -1.52889600 | H | 5.73106000  | 0.53989200  | 3.29569900  |
| H | -2.19499400 | 0.90163300  | -2.29646200 | H | 5.51273600  | 2.26922200  | 3.01145800  |
| C | -4.11557100 | 1.65339900  | -1.44176100 | O | 1.00841400  | -0.54018600 | 3.43778100  |
| N | -4.28472100 | 2.33372600  | -0.23975500 | C | 0.34628800  | -1.61283600 | 3.25093300  |
| H | -5.18399800 | 2.41737200  | 0.23821400  | O | -0.15170700 | -2.02381500 | 2.15156700  |
| C | -3.07624000 | 2.44744600  | 0.35720700  | C | 0.14077100  | -2.50023600 | 4.47047400  |
| H | -2.90254000 | 2.90878000  | 1.31819400  | H | -0.56271100 | -3.29758600 | 4.20267000  |
| C | -5.23927700 | 1.33829300  | -2.39364700 | H | 1.11087400  | -2.97639200 | 4.68486800  |
| H | -5.28899500 | 2.09683000  | -3.18962200 | C | -0.33513100 | -1.72886500 | 5.71220500  |
| H | -4.99514300 | 0.39364700  | -2.89819700 | H | -1.29470500 | -1.23936900 | 5.48661400  |
| C | -6.65529400 | 1.24208100  | -1.75954900 | H | 0.38128000  | -0.92541400 | 5.92411800  |
| H | -7.03629300 | 2.24229800  | -1.52495200 | C | -0.49346400 | -2.63720200 | 6.93582900  |
| H | -7.33817500 | 0.79816700  | -2.49677100 | H | -1.22377800 | -3.43755000 | 6.75072600  |

|   |             |             |            |   |            |             |             |
|---|-------------|-------------|------------|---|------------|-------------|-------------|
| H | -0.83725800 | -2.06753800 | 7.80899400 | O | 0.18420600 | -1.93558900 | -3.26402000 |
| H | 0.46018200  | -3.11395800 | 7.20282900 |   |            |             |             |

**Pro:**

|    |             |             |             |   |             |             |             |
|----|-------------|-------------|-------------|---|-------------|-------------|-------------|
| Ca | -2.44562800 | 0.27900400  | -1.33995100 | H | -1.46123700 | -4.67279800 | -6.49261200 |
| Mn | -0.04813800 | -1.76049600 | -0.24961200 | H | -3.23136500 | -4.64277800 | -6.59832100 |
| Mn | -1.66511600 | -0.89120900 | 1.72565400  | H | -2.42965300 | -5.70817900 | -5.42893200 |
| Mn | 0.03520800  | 0.98396400  | 0.58102200  | N | 1.99339000  | -2.06016400 | -0.49737500 |
| Mn | 0.31460900  | 3.35292400  | -1.65692700 | C | 2.78235600  | -1.72718400 | -1.57588400 |
| O  | -1.81274200 | -1.69182600 | 0.09462400  | H | 2.34701800  | -1.29772900 | -2.46808100 |
| O  | 0.18546900  | -0.86031300 | 1.34656500  | C | 4.09528400  | -2.02218000 | -1.28885900 |
| O  | -1.73875700 | 0.71985100  | 0.93657600  | N | 4.07318900  | -2.55720100 | -0.00511800 |
| O  | -0.02109600 | -0.08502800 | -0.93898500 | H | 4.90260500  | -2.65540000 | 0.58492800  |
| O  | -0.36476000 | 2.52857800  | -0.16464300 | C | 2.79592700  | -2.54115400 | 0.43870700  |
| O  | -4.46113100 | -0.29030100 | -2.72208500 | H | 2.48257400  | -2.86161400 | 1.42125300  |
| H  | -4.98980500 | -0.53953500 | -1.93556200 | C | 5.34452600  | -1.87368400 | -2.11792300 |
| H  | -4.06630100 | -1.12006700 | -3.05923900 | H | 5.41032800  | -2.68654100 | -2.85703200 |
| O  | -1.35367400 | 1.76879600  | -3.21352800 | H | 5.25282700  | -0.94801800 | -2.70296400 |
| H  | -1.23988900 | 1.51354200  | -4.14717100 | C | 6.68172300  | -1.86087200 | -1.32794400 |
| H  | -1.90321800 | 3.32710500  | -2.72451400 | H | 6.93069100  | -2.87112100 | -0.98468600 |
| O  | 0.77028500  | 4.62654200  | -2.93565900 | H | 7.48409000  | -1.54045500 | -2.00660000 |
| H  | 1.24932200  | 4.21038800  | -3.67145800 | C | 6.62488700  | -0.98113500 | -0.08082200 |
| O  | 0.70867400  | 5.15994500  | -0.50179500 | O | 6.42722800  | -1.47013300 | 1.03848400  |
| H  | 1.01344600  | 5.52253400  | -1.37446300 | N | 6.72731900  | 0.35941200  | -0.28197600 |
| H  | 1.52140100  | 4.91655200  | -0.02312000 | H | 6.83347700  | 0.69117100  | -1.23299700 |
| O  | -3.35463600 | 2.61662400  | -1.11542300 | C | 6.33795800  | 1.32931500  | 0.74696100  |
| C  | -2.67502500 | 3.62560000  | -0.99402900 | H | 6.74802100  | 0.97724200  | 1.69877900  |
| O  | -1.82239900 | 4.00808700  | -1.99406000 | H | 6.82417200  | 2.28183100  | 0.49986100  |
| C  | -2.70901000 | 4.58332200  | 0.16117300  | C | 4.81195100  | 1.49871700  | 0.86564800  |
| H  | -1.67442300 | 4.88426700  | 0.36337300  | H | 4.36702700  | 0.55063200  | 1.18697100  |
| H  | -3.22774200 | 5.48873800  | -0.19507400 | H | 4.60734800  | 2.22653000  | 1.66417600  |
| C  | -3.38931200 | 3.99205700  | 1.39615400  | C | 4.16012400  | 1.95607500  | -0.44239200 |
| H  | -2.87263900 | 3.07766500  | 1.70889200  | H | 4.40571500  | 1.24572600  | -1.24747600 |
| H  | -4.43604500 | 3.73806900  | 1.19134800  | H | 4.53996300  | 2.93466400  | -0.76503400 |
| H  | -3.36407600 | 4.71555300  | 2.22030700  | C | 2.63313700  | 2.02972000  | -0.42719500 |
| O  | -0.28989600 | -2.70495500 | -1.94195800 | O | 2.01597800  | 1.28152600  | 0.38148800  |
| C  | -1.23379100 | -2.57201500 | -2.80991800 | O | 2.14536200  | 2.84487200  | -1.27829900 |
| O  | -2.06504800 | -1.63482200 | -2.84776100 | O | -0.01050500 | -3.48735000 | 0.86084500  |
| C  | -1.26754200 | -3.67769800 | -3.86331100 | C | -0.67748200 | -3.61897300 | 1.94132900  |
| H  | -0.30359900 | -3.64587500 | -4.39528200 | O | -1.37786100 | -2.72777100 | 2.51602700  |
| H  | -1.27008300 | -4.63834200 | -3.32756700 | C | -0.63421700 | -5.00151800 | 2.58583600  |
| C  | -2.43130200 | -3.59805600 | -4.85405300 | H | 0.39556300  | -5.37311000 | 2.49765800  |
| H  | -2.41818000 | -2.61817900 | -5.35105600 | H | -1.24077600 | -5.65736900 | 1.94166800  |
| H  | -3.38095300 | -3.64702300 | -4.30147900 | H | -5.96733100 | -2.16021300 | 2.03396500  |
| C  | -2.38669000 | -4.71673700 | -5.90113500 | C | -1.13255700 | -5.05564300 | 4.03045100  |

|   |             |             |            |   |             |             |             |
|---|-------------|-------------|------------|---|-------------|-------------|-------------|
| H | -1.08858400 | -6.08440700 | 4.41060200 | C | -0.19725600 | 1.64717900  | 4.86321200  |
| H | -0.52103800 | -4.42226000 | 4.68493100 | H | 0.58883200  | 2.40768900  | 4.78640100  |
| H | -2.16623800 | -4.70082400 | 4.10300000 | H | -1.13115900 | 2.16361700  | 5.13665000  |
| O | -4.39800000 | -0.44620500 | 0.04182500 | C | 0.14057800  | 0.60294700  | 5.93981200  |
| C | -4.51341700 | -0.79601900 | 1.23585900 | H | 1.06334100  | 0.07581100  | 5.65336400  |
| O | -3.54316900 | -0.95824400 | 2.07927600 | H | -0.65547600 | -0.15184800 | 5.96067400  |
| C | -5.88533300 | -1.08615300 | 1.82095600 | C | 0.31451800  | 1.23110200  | 7.32643000  |
| H | -6.67238400 | -0.79081500 | 1.12151800 | H | 1.12258400  | 1.97618500  | 7.33149400  |
| H | -6.00641100 | -0.55620100 | 2.77267200 | H | 0.55867300  | 0.46923400  | 8.07830300  |
| O | -1.20131300 | 0.03730100  | 3.43054500 | H | -0.60531900 | 1.73765900  | 7.65121100  |
| C | -0.41279200 | 1.04101800  | 3.48218000 | O | 0.11750800  | 1.98763300  | -2.83871000 |
| O | 0.20106500  | 1.59045900  | 2.51241800 |   |             |             |             |

**Table S9** Reaction parameters for the closed-cubane crystal or solvent water-Wx (oxo/oxy) nucleophilic attack with W2 as the proton acceptor:

| Spin state | Spin topology<br>(Mn1~Mn4-O10)   | Gibbs Free energy (a.u.) |            |            |
|------------|----------------------------------|--------------------------|------------|------------|
|            |                                  | Rea                      | TS         | Pro        |
| doublet    | $\alpha\alpha\beta\beta\alpha$   | -3366.2435               | -3366.1804 | -3366.1818 |
|            | $\alpha\beta\alpha\beta\alpha$   | -3366.2419               | -3366.1804 | -3366.1817 |
|            | $\alpha\beta\beta\alpha\alpha$   | -3366.2147               | -3366.1741 | -3366.2167 |
|            | $\beta\alpha\alpha\beta\alpha$   | -3366.2469               | -3366.1803 | -3366.1819 |
|            | $\beta\alpha\beta\alpha\alpha$   | -3366.2139               | -3366.1732 | -3366.2159 |
|            | $\beta\beta\alpha\alpha\alpha$   | -3366.2110               | -3366.1730 | -3366.2155 |
| sextet     | $\alpha\alpha\alpha\beta\beta$   | -3366.2167               | -3366.1761 | -3366.2187 |
|            | $\alpha\alpha\beta\alpha\beta$   | -3366.2442               | -3366.1812 | -3366.1829 |
|            | $\alpha\beta\alpha\alpha\beta$   | -3366.2433               | -3366.1803 | -3366.1817 |
|            | $\beta\alpha\alpha\alpha\beta$   | -3366.2445               | -3366.1816 | -3366.1830 |
| octet      | $\alpha\alpha\alpha\beta\alpha$  | -3366.2453               | -3366.1833 | -3366.1846 |
|            | $\alpha\alpha\beta\alpha\alpha$  | -3366.2157               | -3366.1754 | -3366.2182 |
|            | $\alpha\beta\alpha\alpha\alpha$  | -3366.2119               | -3366.1734 | -3366.2151 |
|            | $\beta\alpha\alpha\alpha\alpha$  | -3366.2124               | -3366.1746 | -3366.2168 |
| 12-et      | $\alpha\alpha\alpha\alpha\beta$  | -3366.2463               | -3366.1828 | -3366.1843 |
| 14-et      | $\alpha\alpha\alpha\alpha\alpha$ | -3366.2143               | -3366.1760 | -3366.2178 |

  

| Spin state | Spin topology<br>(Mn1~Mn4-O10) | Relative Gibbs Free energy (kcal/mol) |                      |                  |                  |
|------------|--------------------------------|---------------------------------------|----------------------|------------------|------------------|
|            |                                | $\Delta G^\ddagger$ (Rea-TS)          | $\Delta G$ (Rea-Pro) | $\Delta G$ (Rea) | $\Delta G$ (Pro) |
| doublet    | $\alpha\alpha\beta\beta\alpha$ | 39.6                                  | 38.7                 | 2.1              | 23.2             |
|            | $\alpha\beta\alpha\beta\alpha$ | 38.6                                  | 37.8                 | 3.1              | 23.2             |
|            | $\alpha\beta\beta\alpha\alpha$ | 25.5                                  | -1.3                 | 20.2             | 1.3              |
|            | $\beta\alpha\alpha\beta\alpha$ | 41.8                                  | 40.8                 | 0.0              | 23.1             |
|            | $\beta\alpha\beta\alpha\alpha$ | 25.5                                  | -1.3                 | 20.7             | 1.8              |
|            | $\beta\beta\alpha\alpha\alpha$ | 23.8                                  | -2.8                 | 22.5             | 2.0              |

|        |       |      |      |      |      |
|--------|-------|------|------|------|------|
| sextet | αααββ | 25.5 | -1.3 | 19.0 | 0.0  |
|        | ααβαβ | 39.5 | 38.5 | 1.7  | 22.5 |
|        | αβααβ | 39.5 | 38.7 | 2.3  | 23.2 |
|        | βαααβ | 39.5 | 38.6 | 1.5  | 22.4 |
| octet  | αααβα | 38.9 | 38.1 | 1.0  | 21.4 |
|        | ααβαα | 25.3 | -1.6 | 19.6 | 0.3  |
|        | αβααα | 24.2 | -2.0 | 22.0 | 2.3  |
|        | βαααα | 23.7 | -2.8 | 21.6 | 1.2  |
| 12-et  | ααααβ | 39.8 | 38.9 | 0.4  | 21.6 |
| 14-et  | ααααα | 24.0 | -2.2 | 20.5 | 0.6  |

| Spin state | Spin topology<br>(Mn1~Mn4-O10) |       | Mulliken spin density |       |       |
|------------|--------------------------------|-------|-----------------------|-------|-------|
|            |                                |       | Rea                   | TS    | Pro   |
| doublet    | α                              | Mn1   | 2.92                  | 2.93  | 2.92  |
|            | α                              | Mn2   | 2.93                  | 2.95  | 2.95  |
|            | β                              | Mn3   | -2.93                 | -2.86 | -2.84 |
|            | β                              | Mn4   | -1.86                 | -2.28 | -1.99 |
|            | α                              | O10   | -0.15                 | 0.00  | -0.03 |
|            |                                | O8    | 0.00                  | 0.27  | 0.02  |
|            |                                | O7    | 0.05                  | 0.01  | 0.01  |
|            | α                              | Mn1   | 2.94                  | 2.95  | 2.94  |
|            | β                              | Mn2   | -2.92                 | -2.94 | -2.95 |
|            | α                              | Mn3   | 2.91                  | 2.86  | 2.87  |
|            | β                              | Mn4   | -1.80                 | -2.23 | -1.95 |
|            | α                              | O10   | -0.14                 | 0.01  | -0.04 |
|            |                                | O8    | 0.00                  | 0.28  | 0.02  |
|            |                                | O7    | 0.06                  | 0.01  | 0.01  |
|            | α                              | Mn1   | 2.94                  | 2.92  | 2.92  |
|            | β                              | Mn2   | -2.93                 | -2.93 | -2.93 |
|            | β                              | Mn3   | -2.84                 | -2.82 | -2.83 |
|            | α                              | Mn4   | 2.64                  | 3.47  | 3.79  |
|            | α                              | O10   | 0.87                  | 0.26  | 0.09  |
|            |                                | O8    | 0.00                  | 0.22  | 0.01  |
|            |                                | O7    | 0.30                  | -0.01 | -0.02 |
| β          | Mn1                            | -2.92 | -2.91                 | -2.91 |       |
| α          | Mn2                            | 2.93  | 2.93                  | 2.93  |       |
| α          | Mn3                            | 2.89  | 2.87                  | 2.88  |       |
| β          | Mn4                            | -1.81 | -2.23                 | -1.95 |       |
| α          | O10                            | -0.12 | 0.01                  | -0.04 |       |
|            | O8                             | 0.00  | 0.28                  | 0.02  |       |
|            | O7                             | 0.06  | 0.01                  | 0.01  |       |
| β          | Mn1                            | -2.94 | -2.93                 | -2.92 |       |
| α          | Mn2                            | 2.94  | 2.95                  | 2.94  |       |
| β          | Mn3                            | -2.82 | -2.80                 | -2.81 |       |

|        |          |     |       |       |       |
|--------|----------|-----|-------|-------|-------|
|        | $\alpha$ | Mn4 | 2.64  | 3.47  | 3.79  |
|        | $\alpha$ | O10 | 0.87  | 0.26  | 0.09  |
|        |          | O8  | 0.00  | 0.22  | 0.01  |
|        |          | O7  | 0.30  | -0.01 | -0.02 |
|        | $\beta$  | Mn1 | -2.94 | -2.93 | -2.92 |
|        | $\beta$  | Mn2 | -2.94 | -2.95 | -2.95 |
|        | $\alpha$ | Mn3 | 2.88  | 2.85  | 2.88  |
|        | $\alpha$ | Mn4 | 2.69  | 3.54  | 3.93  |
|        | $\alpha$ | O10 | 0.85  | 0.26  | -0.04 |
|        |          | O8  | 0.00  | 0.21  | 0.01  |
|        |          | O7  | 0.37  | 0.00  | -0.01 |
|        | $\alpha$ | Mn1 | 2.94  | 2.93  | 2.93  |
|        | $\alpha$ | Mn2 | 2.93  | 2.93  | 2.93  |
|        | $\alpha$ | Mn3 | 2.85  | 2.83  | 2.84  |
|        | $\beta$  | Mn4 | -2.64 | -3.47 | -3.80 |
|        | $\beta$  | O10 | -0.87 | -0.26 | -0.09 |
|        |          | O8  | 0.00  | -0.22 | -0.01 |
|        |          | O7  | -0.29 | 0.01  | 0.02  |
|        | $\alpha$ | Mn1 | 2.92  | 2.91  | 2.92  |
|        | $\alpha$ | Mn2 | 2.93  | 2.95  | 2.95  |
|        | $\beta$  | Mn3 | -2.89 | -2.83 | -2.83 |
|        | $\alpha$ | Mn4 | 1.80  | 2.23  | 1.94  |
|        | $\beta$  | O10 | 0.14  | -0.01 | 0.04  |
|        |          | O8  | 0.00  | -0.28 | -0.02 |
|        |          | O7  | -0.01 | -0.01 | -0.01 |
| sextet | $\alpha$ | Mn1 | 2.94  | 2.93  | 2.93  |
|        | $\beta$  | Mn2 | -2.92 | -2.94 | -2.95 |
|        | $\alpha$ | Mn3 | 2.95  | 2.88  | 2.87  |
|        | $\alpha$ | Mn4 | 1.86  | 2.28  | 1.99  |
|        | $\beta$  | O10 | 0.15  | 0.00  | 0.03  |
|        |          | O8  | 0.00  | -0.28 | -0.02 |
|        |          | O7  | -0.05 | -0.01 | -0.01 |
|        | $\beta$  | Mn1 | -2.92 | -2.92 | -2.92 |
|        | $\alpha$ | Mn2 | 2.92  | 2.93  | 2.93  |
|        | $\alpha$ | Mn3 | 2.95  | 2.90  | 2.89  |
|        | $\alpha$ | Mn4 | 1.86  | 2.27  | 1.99  |
|        | $\beta$  | O10 | 0.15  | 0.00  | 0.03  |
|        |          | O8  | 0.00  | -0.28 | -0.02 |
|        |          | O7  | -0.05 | -0.01 | -0.01 |
|        | $\alpha$ | Mn1 | 2.93  | 2.95  | 2.94  |
|        | $\alpha$ | Mn2 | 2.92  | 2.93  | 2.93  |
|        | $\alpha$ | Mn3 | 2.92  | 2.89  | 2.91  |
|        | $\beta$  | Mn4 | -1.80 | -2.23 | -1.95 |
|        | $\alpha$ | O10 | -0.14 | 0.01  | -0.04 |
| octet  |          |     |       |       |       |

|       |          |     |       |       |       |
|-------|----------|-----|-------|-------|-------|
|       |          | O8  | 0.00  | 0.28  | 0.02  |
|       |          | O7  | 0.06  | 0.01  | 0.01  |
|       | $\alpha$ | Mn1 | 2.95  | 2.93  | 2.92  |
|       | $\alpha$ | Mn2 | 2.95  | 2.95  | 2.95  |
|       | $\beta$  | Mn3 | -2.80 | -2.78 | -2.79 |
|       | $\alpha$ | Mn4 | 2.63  | 3.47  | 3.79  |
|       | $\alpha$ | O10 | 0.87  | 0.26  | 0.09  |
|       |          | O8  | 0.00  | 0.22  | 0.01  |
|       |          | O7  | 0.30  | -0.01 | -0.02 |
|       | $\alpha$ | Mn1 | 2.95  | 2.93  | 2.92  |
|       | $\beta$  | Mn2 | -2.94 | -2.94 | -2.94 |
|       | $\alpha$ | Mn3 | 2.90  | 2.87  | 2.89  |
|       | $\alpha$ | Mn4 | 2.69  | 3.54  | 3.94  |
|       | $\alpha$ | O10 | 0.85  | 0.26  | -0.04 |
|       |          | O8  | 0.00  | 0.21  | 0.01  |
|       |          | O7  | 0.37  | 0.01  | -0.01 |
|       | $\beta$  | Mn1 | -2.93 | -2.92 | -2.92 |
|       | $\alpha$ | Mn2 | 2.93  | 2.94  | 2.93  |
|       | $\alpha$ | Mn3 | 2.93  | 2.90  | 2.92  |
|       | $\alpha$ | Mn4 | 2.69  | 3.54  | 3.93  |
|       | $\alpha$ | O10 | 0.85  | 0.26  | -0.04 |
|       |          | O8  | 0.00  | 0.21  | 0.01  |
|       |          | O7  | 0.37  | 0.00  | -0.01 |
| 12-et | $\alpha$ | Mn1 | 2.93  | 2.93  | 2.93  |
|       | $\alpha$ | Mn2 | 2.92  | 2.93  | 2.93  |
|       | $\alpha$ | Mn3 | 2.96  | 2.92  | 2.91  |
|       | $\alpha$ | Mn4 | 1.86  | 2.27  | 1.99  |
|       | $\beta$  | O10 | 0.14  | 0.00  | 0.03  |
|       |          | O8  | 0.00  | -0.28 | -0.02 |
|       |          | O7  | -0.05 | -0.01 | -0.01 |
| 14-et | $\alpha$ | Mn1 | 2.95  | 2.93  | 2.92  |
|       | $\alpha$ | Mn2 | 2.93  | 2.93  | 2.93  |
|       | $\alpha$ | Mn3 | 2.93  | 2.90  | 2.93  |
|       | $\alpha$ | Mn4 | 2.69  | 3.54  | 3.93  |
|       | $\alpha$ | O10 | 0.85  | 0.26  | -0.04 |
|       |          | O8  | 0.00  | 0.21  | 0.01  |
|       |          | O7  | 0.37  | 0.00  | -0.01 |

**Rea:**

|    |             |             |             |   |             |             |             |
|----|-------------|-------------|-------------|---|-------------|-------------|-------------|
| Ca | -2.55748500 | -0.39452000 | 1.00052300  | O | 0.48673400  | 1.50976600  | -0.67914000 |
| Mn | 0.36691200  | 1.29913700  | 1.16017600  | O | -1.79056600 | 0.53940200  | -1.13094300 |
| Mn | -1.27475000 | 2.21922200  | -0.77443300 | O | -0.08579700 | -0.41887500 | 0.67970400  |
| Mn | -0.16680500 | -0.28167200 | -1.17744600 | O | -0.98168500 | -1.81474700 | -1.51272000 |
| Mn | -0.91024200 | -3.41929100 | -0.73071500 | O | -4.40914800 | -0.19604600 | 2.67453000  |
| O  | -1.34108900 | 1.85908200  | 1.00393100  | H | -4.80082900 | 0.60583400  | 2.27415800  |



|   |             |             |             |   |             |             |             |
|---|-------------|-------------|-------------|---|-------------|-------------|-------------|
| H | -3.84987400 | 0.10535600  | 3.41686000  | H | 7.43429600  | 0.48403800  | 1.42527800  |
| O | 1.51999300  | -2.32846100 | 2.09416400  | H | 7.63665700  | -1.21966000 | 1.84688800  |
| H | 0.98811200  | -1.65018900 | 1.62233600  | C | 6.62849900  | -0.80481900 | -0.03865000 |
| H | 0.94240500  | -3.10677800 | 2.00001500  | O | 6.61318900  | 0.09117000  | -0.89386500 |
| O | -0.71384000 | -5.03994000 | 0.17029500  | N | 6.31851500  | -2.09232900 | -0.33774400 |
| H | -1.62332900 | -5.36483200 | 0.32245300  | H | 6.28468700  | -2.77126800 | 0.41298000  |
| O | -0.61900800 | -4.19843900 | -2.75604100 | C | 5.79469400  | -2.47120000 | -1.65337400 |
| H | 0.35063000  | -4.31153500 | -2.71871400 | H | 6.40959800  | -1.96661100 | -2.40617500 |
| H | -0.75665400 | -3.33106800 | -3.19085700 | H | 5.94276500  | -3.55297100 | -1.76455600 |
| O | -3.80461200 | -2.11842500 | -0.03980500 | C | 4.31780600  | -2.09336000 | -1.86004900 |
| C | -3.79820000 | -3.17692900 | -0.68721000 | H | 4.20723900  | -1.00827900 | -1.76163600 |
| O | -2.74345500 | -3.85518800 | -1.03128100 | H | 4.05120900  | -2.34348600 | -2.89817000 |
| C | -5.11961300 | -3.76508800 | -1.17669100 | C | 3.36876700  | -2.80680100 | -0.89149900 |
| H | -5.88226900 | -3.48750400 | -0.43872500 | H | 3.61520700  | -2.56466600 | 0.15379300  |
| H | -5.37236800 | -3.21360900 | -2.09639100 | H | 3.43534000  | -3.89766900 | -0.99039800 |
| C | -5.11731200 | -5.27092700 | -1.44969500 | C | 1.90248900  | -2.41344300 | -1.02318800 |
| H | -4.88930300 | -5.83955900 | -0.53856200 | O | 1.63933300  | -1.20269600 | -1.28145100 |
| H | -4.36915300 | -5.53496900 | -2.20481500 | O | 1.07825300  | -3.37338800 | -0.83583600 |
| H | -6.10261000 | -5.59489400 | -1.80847600 | O | 0.85787200  | 3.26437500  | 1.34578100  |
| O | 0.29436200  | 0.99179900  | 3.05572500  | C | 0.33640300  | 4.17996600  | 0.62627600  |
| C | -0.66803900 | 0.47071800  | 3.75033600  | O | -0.48483800 | 4.01710200  | -0.33094500 |
| O | -1.72793400 | 0.00524000  | 3.28236500  | C | 0.74301700  | 5.60759000  | 0.97394900  |
| C | -0.39604000 | 0.44092700  | 5.24986900  | H | 1.82496000  | 5.60169600  | 1.16265800  |
| H | 0.43378400  | -0.26777000 | 5.40209000  | H | 0.27546100  | 5.82915100  | 1.94597700  |
| H | 0.00014500  | 1.42481500  | 5.53882800  | H | -6.19110000 | 2.90929500  | 0.01233100  |
| C | -1.59710400 | 0.04758800  | 6.11362500  | C | 0.35601900  | 6.65992200  | -0.06558900 |
| H | -1.97803900 | -0.92588400 | 5.77747400  | H | 0.66781500  | 7.65722000  | 0.27000600  |
| H | -2.41185200 | 0.76928300  | 5.95226700  | H | 0.83473100  | 6.45855900  | -1.03175200 |
| C | -1.24916900 | -0.01042300 | 7.60520900  | H | -0.72673900 | 6.67098700  | -0.23114400 |
| H | -0.45970500 | -0.74955900 | 7.80089100  | O | -4.14686000 | 1.47000700  | 0.46661700  |
| H | -2.12405600 | -0.29088900 | 8.20585000  | C | -4.08526000 | 2.49903100  | -0.23490600 |
| H | -0.89047700 | 0.96180600  | 7.97139300  | O | -3.02897100 | 2.93709100  | -0.85235500 |
| N | 2.40763600  | 0.97896200  | 1.25409500  | C | -5.30730600 | 3.37958000  | -0.42725100 |
| C | 3.14908100  | 0.19276600  | 2.10861900  | H | -5.46984100 | 3.56356600  | -1.49564300 |
| H | 2.67543000  | -0.40415000 | 2.87425600  | H | -5.13192300 | 4.35392000  | 0.04721600  |
| C | 4.47379200  | 0.26198100  | 1.75006300  | O | -0.91824800 | 2.42045300  | -2.74031800 |
| N | 4.51485800  | 1.13853700  | 0.67004600  | C | -0.39557200 | 1.50459900  | -3.45277300 |
| H | 5.32378500  | 1.26213800  | 0.05688800  | O | 0.00798600  | 0.35769800  | -3.05693100 |
| C | 3.25234400  | 1.52752500  | 0.39057900  | C | -0.25433400 | 1.78984700  | -4.94135300 |
| H | 2.97057200  | 2.16468300  | -0.43500700 | H | 0.45633200  | 1.06748600  | -5.36111700 |
| C | 5.67074800  | -0.44692800 | 2.32678300  | H | -1.23583300 | 1.57267700  | -5.39423700 |
| H | 5.96691000  | 0.01355300  | 3.28124200  | C | 0.15400700  | 3.23387100  | -5.26697700 |
| H | 5.35707700  | -1.47002500 | 2.57639300  | H | 1.12740500  | 3.44725500  | -4.80024900 |
| C | 6.93214300  | -0.48966000 | 1.42513000  | H | -0.56703700 | 3.91934900  | -4.80479600 |

|   |            |            |             |   |             |             |             |
|---|------------|------------|-------------|---|-------------|-------------|-------------|
| C | 0.23768300 | 3.48675700 | -6.77589700 | H | -0.73229000 | 3.31289600  | -7.26278600 |
| H | 0.97246300 | 2.82431200 | -7.25473400 | O | -1.08259900 | -2.86115400 | 0.89580400  |
| H | 0.53524900 | 4.52208000 | -6.98666100 |   |             |             |             |

**TS:**

|    |             |             |             |   |             |             |             |
|----|-------------|-------------|-------------|---|-------------|-------------|-------------|
| Ca | -2.66659700 | -0.34710000 | 0.81681600  | C | -2.00077200 | 0.85387700  | 7.45509800  |
| Mn | 0.31147900  | 1.27774500  | 1.11115100  | H | -1.21535100 | 0.19846200  | 7.85718100  |
| Mn | -1.18308100 | 2.11062200  | -0.97914300 | H | -2.93053600 | 0.62685500  | 7.99248500  |
| Mn | -0.05601100 | -0.40703900 | -1.19917900 | H | -1.72153000 | 1.88974700  | 7.69404500  |
| Mn | -0.84809200 | -3.42105700 | -0.41091000 | N | 2.35247400  | 0.96947200  | 1.36781400  |
| O  | -1.37362800 | 1.83468700  | 0.80937900  | C | 3.05543400  | 0.20685200  | 2.27341900  |
| O  | 0.55656700  | 1.41998000  | -0.72118200 | H | 2.54823800  | -0.31725300 | 3.07229400  |
| O  | -1.68502200 | 0.41684100  | -1.28138000 | C | 4.39926800  | 0.27075500  | 1.97824400  |
| O  | -0.06305600 | -0.46078600 | 0.69554000  | N | 4.48516400  | 1.11873900  | 0.88050400  |
| O  | -0.78608900 | -1.97855800 | -1.50679600 | H | 5.32566800  | 1.24406500  | 0.30957700  |
| O  | -4.63886300 | -0.04618600 | 2.33691300  | C | 3.23606300  | 1.49715500  | 0.53387700  |
| H  | -4.98050600 | 0.73863100  | 1.86369600  | H | 2.99099400  | 2.10748900  | -0.32314600 |
| H  | -4.11401300 | 0.29102900  | 3.08996500  | C | 5.58306200  | -0.40317500 | 2.62514500  |
| O  | -0.33883300 | -2.56810200 | 2.35586200  | H | 5.80082100  | 0.06137300  | 3.59838500  |
| H  | 0.07714800  | -1.84887900 | 1.78877900  | H | 5.29816700  | -1.44056600 | 2.85072300  |
| H  | -0.10107400 | -3.46972000 | 1.95655500  | C | 6.90188900  | -0.39535800 | 1.80579000  |
| O  | -0.41808200 | -4.78872700 | 0.78735900  | H | 7.36149000  | 0.59858900  | 1.83411000  |
| H  | -1.25749100 | -5.16483200 | 1.11157000  | H | 7.60602500  | -1.09361000 | 2.27872900  |
| O  | -0.01019700 | -4.54587500 | -2.18828400 | C | 6.70759400  | -0.72919900 | 0.32634300  |
| H  | 0.88108900  | -4.68048600 | -1.81519500 | O | 6.69946600  | 0.16368700  | -0.53218400 |
| H  | 0.05206000  | -3.73117500 | -2.72769000 | N | 6.47102600  | -2.02852100 | 0.01423500  |
| O  | -3.77793400 | -2.15795500 | -0.35130700 | H | 6.44758800  | -2.71042800 | 0.76261600  |
| C  | -3.68393800 | -3.27912500 | -0.88021100 | C | 5.98712700  | -2.42769300 | -1.31315900 |
| O  | -2.62335600 | -4.02469100 | -0.89214300 | H | 6.62179300  | -1.93723200 | -2.05882500 |
| C  | -4.89148900 | -3.85764400 | -1.61815500 | H | 6.13956100  | -3.51088900 | -1.39912300 |
| H  | -5.78633700 | -3.49833500 | -1.09540600 | C | 4.51329500  | -2.05520000 | -1.56149300 |
| H  | -4.89887000 | -3.36962600 | -2.60561800 | H | 4.40966500  | -0.96532600 | -1.54818100 |
| C  | -4.90069700 | -5.37906800 | -1.77904800 | H | 4.24805300  | -2.38123000 | -2.57775200 |
| H  | -4.91272500 | -5.88125300 | -0.80331200 | C | 3.56031700  | -2.68082800 | -0.54003400 |
| H  | -4.01229600 | -5.72293600 | -2.31944400 | H | 3.85786500  | -2.38156700 | 0.47713000  |
| H  | -5.79260700 | -5.69763000 | -2.33404200 | H | 3.60754600  | -3.77816800 | -0.56156700 |
| O  | 0.09806300  | 1.06627900  | 3.01753000  | C | 2.08658100  | -2.28247600 | -0.65727700 |
| C  | -0.98662700 | 0.75178100  | 3.65972600  | O | 1.81559300  | -1.17082700 | -1.20583900 |
| O  | -2.02496200 | 0.29724700  | 3.14161300  | O | 1.26554000  | -3.10689800 | -0.14950800 |
| C  | -0.89183100 | 0.96943800  | 5.16659300  | O | 0.79973000  | 3.25485000  | 1.24440300  |
| H  | -0.05633900 | 0.35051500  | 5.52955400  | C | 0.33172100  | 4.13824000  | 0.45025500  |
| H  | -0.57407300 | 2.01034900  | 5.32845000  | O | -0.42036400 | 3.93547800  | -0.55356900 |
| C  | -2.17155400 | 0.65507300  | 5.94489900  | C | 0.71502300  | 5.58060100  | 0.76543300  |
| H  | -2.47764600 | -0.37834500 | 5.73330800  | H | 1.77521700  | 5.58269300  | 1.05198500  |
| H  | -2.98508900 | 1.29719100  | 5.57705600  | H | 0.16162900  | 5.85013100  | 1.67863600  |

|   |             |            |             |   |             |             |             |
|---|-------------|------------|-------------|---|-------------|-------------|-------------|
| H | -6.13761500 | 2.94937200 | -0.62049700 | O | 0.21635900  | 0.14755300  | -3.08627100 |
| C | 0.42956800  | 6.58246100 | -0.35386700 | C | 0.06640300  | 1.48546200  | -5.04909900 |
| H | 0.71425700  | 7.59481200 | -0.03971400 | H | 0.78938700  | 0.73694900  | -5.39537700 |
| H | 0.99316600  | 6.33463500 | -1.26179500 | H | -0.89275900 | 1.25445500  | -5.54107600 |
| H | -0.63346300 | 6.58536600 | -0.61784700 | C | 0.50707100  | 2.90824900  | -5.42235700 |
| O | -4.17567200 | 1.49307500 | 0.07392800  | H | 1.45756900  | 3.13590200  | -4.91665800 |
| C | -4.03024100 | 2.47770500 | -0.67851700 | H | -0.22904700 | 3.62181600  | -5.03197100 |
| O | -2.91652100 | 2.85551900 | -1.22628300 | C | 0.67107900  | 3.08652300  | -6.93537000 |
| C | -5.21158100 | 3.36687600 | -1.02500800 | H | 1.42186200  | 2.39491300  | -7.34288100 |
| H | -5.29021800 | 3.47254300 | -2.11341700 | H | 0.99067000  | 4.10770200  | -7.18041100 |
| H | -5.04584200 | 4.37057200 | -0.61251400 | H | -0.27448000 | 2.89735800  | -7.46285300 |
| O | -0.70512100 | 2.22855200 | -2.91903600 | O | -1.70116100 | -2.58052800 | 1.14730000  |
| C | -0.15498900 | 1.27477100 | -3.55807300 |   |             |             |             |

**Pro:**

|    |             |             |             |   |             |             |             |
|----|-------------|-------------|-------------|---|-------------|-------------|-------------|
| Ca | -2.66113000 | -0.45102700 | 0.72762100  | H | -5.76939100 | -5.80128800 | -2.28689100 |
| Mn | 0.29068300  | 1.21837400  | 1.20092500  | O | 0.04516000  | 0.84559000  | 3.07182800  |
| Mn | -1.16498300 | 2.22117700  | -0.84135800 | C | -1.05540400 | 0.49495000  | 3.67177000  |
| Mn | -0.01695900 | -0.25399200 | -1.24110000 | O | -2.09559600 | 0.11861500  | 3.10279000  |
| Mn | -0.78460300 | -3.26872300 | -0.70976500 | C | -0.97077300 | 0.56649800  | 5.19300300  |
| O  | -1.38723500 | 1.79772100  | 0.90881100  | H | -0.14378200 | -0.09204400 | 5.50145700  |
| O  | 0.58050400  | 1.50895800  | -0.61241900 | H | -0.64616900 | 1.58435200  | 5.45673600  |
| O  | -1.64306800 | 0.55192500  | -1.29514900 | C | -2.26050200 | 0.19048200  | 5.92608800  |
| O  | -0.07476400 | -0.47145700 | 0.62255800  | H | -2.57237900 | -0.81511500 | 5.61319200  |
| O  | -0.75137400 | -1.80780500 | -1.70075200 | H | -3.06509200 | 0.87178500  | 5.61374800  |
| O  | -4.67852500 | -0.23677100 | 2.21343000  | C | -2.10280400 | 0.24191700  | 7.44983200  |
| H  | -5.00188200 | 0.57620900  | 1.77615900  | H | -1.32656900 | -0.45595400 | 7.79428500  |
| H  | -4.16761300 | 0.05649000  | 2.99394700  | H | -3.03955300 | -0.02742600 | 7.95459900  |
| O  | -0.52962200 | -2.75213600 | 2.01962200  | H | -1.81777400 | 1.24759600  | 7.78978300  |
| H  | -0.01785800 | -1.96411000 | 1.70612500  | N | 2.32506000  | 0.87572900  | 1.47084700  |
| H  | -0.33569200 | -4.40499900 | 1.31351000  | C | 2.99621700  | 0.03681700  | 2.33168800  |
| O  | -0.54394500 | -4.97011600 | 0.51456800  | H | 2.46340700  | -0.53362600 | 3.08051900  |
| H  | -1.48044400 | -5.21925700 | 0.63934300  | C | 4.34652100  | 0.09717600  | 2.06776700  |
| O  | -0.02837000 | -4.51484500 | -2.64651500 | N | 4.46942900  | 1.02024300  | 1.03596400  |
| H  | 0.90948700  | -4.42071300 | -2.39985700 | H | 5.32325400  | 1.17036300  | 0.49167500  |
| H  | -0.20953400 | -3.75104200 | -3.22728900 | C | 3.23393800  | 1.44583500  | 0.69421200  |
| O  | -3.77251500 | -2.08537300 | -0.65564100 | H | 3.01654500  | 2.12082000  | -0.12086700 |
| C  | -3.65840900 | -3.21327000 | -1.16829500 | C | 5.50510700  | -0.63931100 | 2.69149700  |
| O  | -2.55597000 | -3.89273000 | -1.25932100 | H | 5.70439800  | -0.24961300 | 3.70087500  |
| C  | -4.88610600 | -3.87742700 | -1.78989600 | H | 5.20208000  | -1.68627100 | 2.83420100  |
| H  | -5.76610100 | -3.48825500 | -1.26381900 | C | 6.84347300  | -0.59058100 | 1.90678300  |
| H  | -4.95053900 | -3.49484400 | -2.82126900 | H | 7.31044600  | 0.39477900  | 2.01176500  |
| C  | -4.86603900 | -5.40818600 | -1.80262000 | H | 7.53006900  | -1.32538800 | 2.34916600  |
| H  | -4.83103800 | -5.81242100 | -0.78206000 | C | 6.68232800  | -0.82486000 | 0.40470200  |
| H  | -3.99012100 | -5.78457600 | -2.34200500 | O | 6.69943000  | 0.12163300  | -0.39390900 |

|   |             |             |             |   |             |             |             |
|---|-------------|-------------|-------------|---|-------------|-------------|-------------|
| N | 6.44656000  | -2.09976600 | 0.00282200  | H | 1.03638900  | 6.44095800  | -0.74956600 |
| H | 6.40692700  | -2.83026200 | 0.70301900  | H | -0.60812400 | 6.64601700  | -0.13509700 |
| C | 6.00472800  | -2.40957200 | -1.36209400 | O | -4.15287500 | 1.47371000  | 0.09552400  |
| H | 6.66599000  | -1.87731900 | -2.05415200 | C | -4.01311400 | 2.51903800  | -0.56747800 |
| H | 6.15351300  | -3.48616200 | -1.51283700 | O | -2.89489900 | 2.96220700  | -1.06065300 |
| C | 4.54285900  | -2.00956700 | -1.63477500 | C | -5.20231100 | 3.41534100  | -0.86474100 |
| H | 4.44391400  | -0.92284900 | -1.54613200 | H | -5.27012900 | 3.59518700  | -1.94421000 |
| H | 4.31244200  | -2.26061500 | -2.68047100 | H | -5.05566600 | 4.38995500  | -0.38157400 |
| C | 3.54927200  | -2.69951200 | -0.69595000 | O | -0.64293900 | 2.49626000  | -2.76033100 |
| H | 3.81161700  | -2.47572400 | 0.35020000  | C | -0.06595600 | 1.60355100  | -3.45968800 |
| H | 3.58714100  | -3.79230200 | -0.79758900 | O | 0.30719200  | 0.44496400  | -3.06925800 |
| C | 2.08931400  | -2.26850800 | -0.84146400 | C | 0.18998900  | 1.93399800  | -4.92307000 |
| O | 1.85150200  | -1.09485600 | -1.24238800 | H | 0.93852100  | 1.22941600  | -5.30556400 |
| O | 1.23763400  | -3.15646700 | -0.49623600 | H | -0.75025800 | 1.72136300  | -5.45804200 |
| O | 0.77841900  | 3.17823200  | 1.49928900  | C | 0.60752000  | 3.39012700  | -5.17380200 |
| C | 0.32382300  | 4.12242500  | 0.77086400  | H | 1.53880100  | 3.59793900  | -4.62560500 |
| O | -0.41186700 | 4.00077200  | -0.25882200 | H | -0.15472900 | 4.05592500  | -4.75058900 |
| C | 0.69965300  | 5.53516400  | 1.20543900  | C | 0.80714100  | 3.68815200  | -6.66350000 |
| H | 1.75112200  | 5.51200900  | 1.52139000  | H | 1.58400700  | 3.04587000  | -7.10173100 |
| H | 0.12017200  | 5.73618600  | 2.12017000  | H | 1.10961200  | 4.73163100  | -6.82047100 |
| H | -6.12668000 | 2.95734300  | -0.50255900 | H | -0.11964200 | 3.52074400  | -7.23018300 |
| C | 0.44688100  | 6.62023900  | 0.15807500  | O | -1.67606300 | -2.65240400 | 1.08853700  |
| H | 0.72293800  | 7.60489000  | 0.55657700  |   |             |             |             |

### W1 (hydroxyl)-W2 (hydroxyl/oxy)

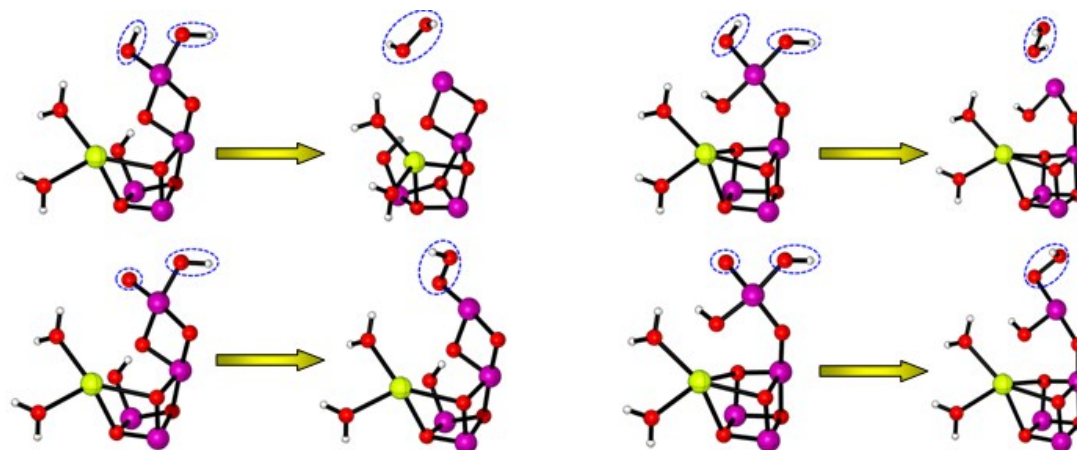

**Fig. S7** Pictorial exhibitions for the open (left) and closed-cubane (right) W1 (hydroxyl)-W2 (hydroxyl) coupling (upper) and W1 (hydroxyl)-W2 (oxy) nucleophilic attack (lower).

**Table S10** Reaction parameters for the open-cubane W1 (hydroxyl)-W2 (hydroxyl) coupling:

| Spin state | Spin topology<br>(Mn1~Mn4-O6/O7) | Gibbs Free energy (a.u.) |    |     |
|------------|----------------------------------|--------------------------|----|-----|
|            |                                  | Rea                      | TS | Pro |
|            |                                  |                          |    |     |

|         |                                  |            |            |            |
|---------|----------------------------------|------------|------------|------------|
| doublet | $\alpha\alpha\beta\alpha$        | -3366.2131 | -3366.1597 | -3366.1651 |
|         | $\alpha\beta\alpha\beta$         | -3366.2125 | -3366.1571 | -3366.1855 |
|         | $\alpha\beta\beta\alpha\alpha$   | -3366.2142 | -3366.1685 | -3366.2084 |
|         | $\beta\alpha\alpha\beta\alpha$   | -3366.2127 | -3366.1581 | -3366.1870 |
|         | $\beta\alpha\beta\alpha\alpha$   | -3366.2148 | -3366.1687 | -3366.2081 |
|         | $\beta\beta\alpha\alpha\alpha$   | -3366.2136 | -3366.1546 | -3366.1882 |
| sextet  | $\alpha\alpha\alpha\beta\beta$   | -3366.2155 | -3366.1702 | -3366.2111 |
|         | $\alpha\alpha\beta\alpha\beta$   | -3366.2136 | -3366.1602 | -3366.1871 |
|         | $\alpha\beta\alpha\alpha\beta$   | -3366.2131 | -3366.1596 | -3366.1690 |
|         | $\beta\alpha\alpha\alpha\beta$   | -3366.2132 | -3366.1604 | -3366.1703 |
| octet   | $\alpha\alpha\alpha\beta\alpha$  | -3366.2143 | -3366.1596 | -3366.1876 |
|         | $\alpha\alpha\beta\alpha\alpha$  | -3366.2163 | -3366.1698 | -3366.2089 |
|         | $\alpha\beta\alpha\alpha\alpha$  | -3366.2162 | -3366.1547 | -3366.1871 |
|         | $\beta\alpha\alpha\alpha\alpha$  | -3366.2153 | -3366.1560 | -3366.1900 |
| 12-et   | $\alpha\alpha\alpha\alpha\beta$  | -3366.2149 | -3366.1619 | -3366.1704 |
| 14-et   | $\alpha\alpha\alpha\alpha\alpha$ | -3366.2161 | -3366.1570 | -3366.1898 |

| Spin state | Spin topology<br>(Mn1~Mn4-O6/O7) | Relative Gibbs Free energy (kcal/mol) |                      |                  |                  |
|------------|----------------------------------|---------------------------------------|----------------------|------------------|------------------|
|            |                                  | $\Delta G^\ddagger$ (Rea-TS)          | $\Delta G$ (Rea-Pro) | $\Delta G$ (Rea) | $\Delta G$ (Pro) |
| doublet    | $\alpha\alpha\beta\beta\alpha$   | 33.5                                  | 30.1                 | 2.0              | 27.5             |
|            | $\alpha\beta\alpha\beta\alpha$   | 34.8                                  | 16.9                 | 2.4              | 14.7             |
|            | $\alpha\beta\beta\alpha\alpha$   | 28.7                                  | 3.6                  | 1.3              | 0.3              |
|            | $\beta\alpha\alpha\beta\alpha$   | 34.3                                  | 16.1                 | 2.3              | 13.7             |
|            | $\beta\alpha\beta\alpha\alpha$   | 28.9                                  | 4.2                  | 0.9              | 0.5              |
|            | $\beta\beta\alpha\alpha\alpha$   | 37.0                                  | 15.9                 | 1.7              | 13.0             |
| sextet     | $\alpha\alpha\alpha\beta\beta$   | 28.4                                  | 2.8                  | 0.5              | 1.4              |
|            | $\alpha\alpha\beta\alpha\beta$   | 33.5                                  | 16.6                 | 1.7              | 13.7             |
|            | $\alpha\beta\alpha\alpha\beta$   | 33.6                                  | 27.7                 | 2.0              | 25.0             |
|            | $\beta\alpha\alpha\alpha\beta$   | 33.1                                  | 26.9                 | 1.9              | 24.2             |
| octet      | $\alpha\alpha\alpha\beta\alpha$  | 34.3                                  | 16.8                 | 1.3              | 13.4             |
|            | $\alpha\alpha\beta\alpha\alpha$  | 29.2                                  | 4.6                  | 0.0              | 0.0              |
|            | $\alpha\beta\alpha\alpha\alpha$  | 38.6                                  | 18.3                 | 0.1              | 13.7             |
|            | $\beta\alpha\alpha\alpha\alpha$  | 37.2                                  | 15.9                 | 0.6              | 11.9             |
| 12-et      | $\alpha\alpha\alpha\alpha\beta$  | 33.3                                  | 27.9                 | 0.9              | 24.2             |
| 14-et      | $\alpha\alpha\alpha\alpha\alpha$ | 37.1                                  | 16.5                 | 0.1              | 12.0             |

| Spin state | Spin topology<br>(Mn1~Mn4-O6/O7) | Mulliken spin density |       |       |  |
|------------|----------------------------------|-----------------------|-------|-------|--|
|            |                                  | Rea                   | TS    | Pro   |  |
| doublet    | $\alpha$ Mn1                     | 2.96                  | 2.95  | 2.95  |  |
|            | $\alpha$ Mn2                     | 2.95                  | 2.96  | 2.96  |  |
|            | $\beta$ Mn3                      | -2.91                 | -2.89 | -2.89 |  |
|            | $\beta$ Mn4                      | -2.95                 | -2.39 | -1.95 |  |
|            | $\alpha$ O6                      | 0.55                  | 0.33  | 0.00  |  |

|        |          |     |       |       |       |
|--------|----------|-----|-------|-------|-------|
|        |          | O7  | 0.54  | 0.09  | 0.00  |
|        | $\alpha$ | Mn1 | 2.95  | 2.95  | 2.91  |
|        | $\beta$  | Mn2 | -2.92 | -2.91 | -2.88 |
|        | $\alpha$ | Mn3 | 2.88  | 3.48  | 3.81  |
|        | $\beta$  | Mn4 | -2.90 | -2.66 | -2.68 |
|        | $\alpha$ | O6  | 0.55  | 0.16  | 0.00  |
|        |          | O7  | 0.55  | 0.28  | 0.00  |
|        | $\alpha$ | Mn1 | 2.94  | 2.94  | 2.94  |
|        | $\beta$  | Mn2 | -2.94 | -2.95 | -2.94 |
|        | $\beta$  | Mn3 | -2.90 | -2.88 | -2.86 |
|        | $\alpha$ | Mn4 | 2.80  | 3.29  | 3.83  |
|        | $\alpha$ | O6  | 0.54  | 0.37  | 0.00  |
|        |          | O7  | 0.53  | 0.30  | -0.01 |
|        | $\beta$  | Mn1 | -2.94 | -2.90 | -2.90 |
|        | $\alpha$ | Mn2 | 2.94  | 2.95  | 2.95  |
|        | $\alpha$ | Mn3 | 2.91  | 3.51  | 3.85  |
|        | $\beta$  | Mn4 | -2.90 | -2.67 | -2.68 |
|        | $\alpha$ | O6  | 0.55  | 0.16  | 0.00  |
|        |          | O7  | 0.55  | 0.28  | 0.00  |
|        | $\beta$  | Mn1 | -2.95 | -2.95 | -2.94 |
|        | $\alpha$ | Mn2 | 2.92  | 2.94  | 2.94  |
|        | $\beta$  | Mn3 | -2.88 | -2.86 | -2.83 |
|        | $\alpha$ | Mn4 | 2.80  | 3.28  | 3.82  |
|        | $\alpha$ | O6  | 0.54  | 0.38  | 0.00  |
|        |          | O7  | 0.53  | 0.30  | -0.01 |
|        | $\beta$  | Mn1 | -2.96 | -2.92 | -2.91 |
|        | $\beta$  | Mn2 | -2.95 | -2.93 | -2.92 |
|        | $\alpha$ | Mn3 | 2.91  | 3.54  | 3.86  |
|        | $\alpha$ | Mn4 | 2.84  | 2.78  | 2.68  |
|        | $\alpha$ | O6  | 0.53  | 0.24  | 0.00  |
|        |          | O7  | 0.54  | 0.26  | 0.00  |
|        | $\alpha$ | Mn1 | 2.97  | 2.96  | 2.96  |
|        | $\alpha$ | Mn2 | 2.96  | 2.97  | 2.96  |
|        | $\alpha$ | Mn3 | 2.91  | 2.89  | 2.87  |
|        | $\beta$  | Mn4 | -2.80 | -3.28 | -3.83 |
|        | $\beta$  | O6  | -0.54 | -0.38 | 0.00  |
|        |          | O7  | -0.53 | -0.30 | 0.01  |
| sextet | $\alpha$ | Mn1 | 2.96  | 2.91  | 2.91  |
|        | $\alpha$ | Mn2 | 2.95  | 2.93  | 2.91  |
|        | $\beta$  | Mn3 | -2.88 | -3.47 | -3.81 |
|        | $\alpha$ | Mn4 | 2.90  | 2.67  | 2.68  |
|        | $\beta$  | O6  | -0.56 | -0.15 | 0.00  |
|        |          | O7  | -0.54 | -0.28 | 0.00  |
|        | $\alpha$ | Mn1 | 2.94  | 2.94  | 2.94  |

|       |          |     |       |       |       |
|-------|----------|-----|-------|-------|-------|
|       | $\beta$  | Mn2 | -2.92 | -2.94 | -2.93 |
|       | $\alpha$ | Mn3 | 2.91  | 2.89  | 2.86  |
|       | $\alpha$ | Mn4 | 2.95  | 2.39  | 2.01  |
|       | $\beta$  | O6  | -0.55 | -0.33 | 0.00  |
|       |          | O7  | -0.54 | -0.09 | 0.00  |
|       | $\beta$  | Mn1 | -2.94 | -2.94 | -2.94 |
|       | $\alpha$ | Mn2 | 2.94  | 2.95  | 2.94  |
|       | $\alpha$ | Mn3 | 2.94  | 2.92  | 2.88  |
|       | $\alpha$ | Mn4 | 2.95  | 2.40  | 1.99  |
|       | $\beta$  | O6  | -0.55 | -0.33 | 0.00  |
|       |          | O7  | -0.54 | -0.10 | 0.00  |
|       | $\alpha$ | Mn1 | 2.97  | 2.97  | 2.95  |
|       | $\alpha$ | Mn2 | 2.96  | 2.96  | 2.96  |
|       | $\alpha$ | Mn3 | 2.92  | 3.52  | 3.85  |
|       | $\beta$  | Mn4 | -2.90 | -2.67 | -2.67 |
|       | $\alpha$ | O6  | 0.55  | 0.16  | 0.00  |
|       |          | O7  | 0.55  | 0.28  | 0.00  |
| octet | $\alpha$ | Mn1 | 2.96  | 2.96  | 2.97  |
|       | $\alpha$ | Mn2 | 2.95  | 2.96  | 2.96  |
|       | $\beta$  | Mn3 | -2.87 | -2.85 | -2.83 |
|       | $\alpha$ | Mn4 | 2.80  | 3.30  | 3.82  |
|       | $\alpha$ | O6  | 0.54  | 0.37  | 0.00  |
|       |          | O7  | 0.53  | 0.29  | -0.01 |
|       | $\alpha$ | Mn1 | 2.95  | 2.96  | 2.93  |
|       | $\beta$  | Mn2 | -2.92 | -2.91 | -2.90 |
|       | $\alpha$ | Mn3 | 2.91  | 3.54  | 3.87  |
|       | $\alpha$ | Mn4 | 2.85  | 2.79  | 2.68  |
|       | $\alpha$ | O6  | 0.54  | 0.24  | 0.00  |
|       |          | O7  | 0.54  | 0.26  | 0.00  |
|       | $\beta$  | Mn1 | -2.94 | -2.91 | -2.90 |
|       | $\alpha$ | Mn2 | 2.94  | 2.95  | 2.95  |
|       | $\alpha$ | Mn3 | 2.94  | 3.56  | 3.89  |
|       | $\alpha$ | Mn4 | 2.85  | 2.79  | 2.68  |
|       | $\alpha$ | O5  | 0.53  | 0.24  | 0.00  |
|       |          | O10 | 0.54  | 0.26  | 0.00  |
| 12-et | $\alpha$ | Mn1 | 2.97  | 2.96  | 2.96  |
|       | $\alpha$ | Mn2 | 2.97  | 2.97  | 2.97  |
|       | $\alpha$ | Mn3 | 2.95  | 2.93  | 2.89  |
|       | $\alpha$ | Mn4 | 2.95  | 2.40  | 2.00  |
|       | $\beta$  | O6  | -0.55 | -0.33 | 0.00  |
|       |          | O7  | -0.55 | -0.10 | 0.00  |
| 14-et | $\alpha$ | Mn1 | 2.97  | 2.97  | 2.95  |
|       | $\alpha$ | Mn2 | 2.96  | 2.97  | 2.97  |
|       | $\alpha$ | Mn3 | 2.95  | 3.58  | 3.90  |

|  |          |     |      |      |      |
|--|----------|-----|------|------|------|
|  | $\alpha$ | Mn4 | 2.85 | 2.79 | 2.69 |
|  | $\alpha$ | O6  | 0.54 | 0.24 | 0.00 |
|  |          | O7  | 0.54 | 0.26 | 0.00 |

**Rea:**

|    |             |             |             |   |             |             |             |
|----|-------------|-------------|-------------|---|-------------|-------------|-------------|
| Ca | 2.38126600  | -0.08633400 | -1.43464700 | H | 2.21978300  | 7.25948600  | -4.00634800 |
| Mn | 0.03121500  | 1.95823100  | -0.06910200 | H | 3.39607200  | 7.45418200  | -2.69480900 |
| Mn | 1.41742400  | 0.38409300  | 1.74761900  | H | 3.94201300  | 6.96370600  | -4.30927700 |
| Mn | -0.18716200 | -1.53658800 | 0.50786500  | N | -2.00862300 | 2.35863300  | -0.29495800 |
| Mn | -0.19529100 | -3.20312400 | -1.62178300 | C | -2.75896100 | 2.26282600  | -1.44740100 |
| O  | 1.72598400  | 1.49744700  | 0.34183500  | H | -2.27788800 | 2.11647100  | -2.40426200 |
| O  | -0.33046900 | 0.44386100  | 1.00645400  | C | -4.09386700 | 2.36519700  | -1.13319200 |
| O  | 1.55275900  | -1.17135300 | 0.84141400  | N | -4.12845800 | 2.54287000  | 0.24496300  |
| O  | 0.12814300  | -1.44201500 | -1.31735700 | H | -4.97371200 | 2.43058200  | 0.81298600  |
| O  | -0.16271700 | -3.28725200 | 0.15558200  | C | -2.85990400 | 2.51413500  | 0.70896400  |
| O  | 4.48555600  | 1.07080200  | -2.20573500 | H | -2.58641500 | 2.58248000  | 1.75095600  |
| H  | 4.93673500  | 0.92060200  | -1.34964300 | C | -5.31525000 | 2.32247600  | -2.01506600 |
| H  | 4.14276200  | 1.98818100  | -2.17013700 | H | -5.39674100 | 3.25545600  | -2.59275900 |
| O  | 1.66434200  | 0.67431600  | -3.75309000 | H | -5.17070100 | 1.52536900  | -2.75789100 |
| H  | 2.17004500  | 1.50777200  | -3.79359900 | C | -6.67001600 | 2.11222600  | -1.29001800 |
| H  | 0.81441200  | 0.96804800  | -3.35098200 | H | -6.94561900 | 3.01437700  | -0.73229400 |
| O  | -0.37322600 | -3.35856000 | -3.56436300 | H | -7.44619600 | 1.95042300  | -2.05048300 |
| H  | -1.34024200 | -3.31081600 | -3.71389100 | C | -6.64560600 | 0.96890600  | -0.27685300 |
| O  | -0.74204400 | -4.99039000 | -2.16759400 | O | -6.45888000 | 1.18559500  | 0.92822600  |
| H  | 0.12277100  | -5.40539800 | -2.37379500 | N | -6.77538800 | -0.28788200 | -0.77357500 |
| O  | 3.02628200  | -2.23298900 | -2.12909000 | H | -6.90670900 | -0.40343700 | -1.77078600 |
| C  | 2.74049100  | -3.43873900 | -2.06533600 | C | -6.53355400 | -1.47943900 | 0.04774400  |
| O  | 1.56596400  | -3.93526900 | -1.83778100 | H | -7.04130600 | -1.32724000 | 1.00609100  |
| C  | 3.85201000  | -4.47201900 | -2.24582900 | H | -7.01351000 | -2.32633300 | -0.45865100 |
| H  | 4.44770100  | -4.13562200 | -3.10487900 | C | -5.04025900 | -1.75314400 | 0.29560200  |
| H  | 4.50776500  | -4.36234100 | -1.36863500 | H | -4.60564600 | -0.90585000 | 0.83657100  |
| C  | 3.40865300  | -5.92581300 | -2.40861600 | H | -4.95659900 | -2.62615100 | 0.95828300  |
| H  | 2.77172800  | -6.05007100 | -3.29397800 | C | -4.24993000 | -2.00269800 | -0.99320100 |
| H  | 2.84475800  | -6.26930900 | -1.53355500 | H | -4.38942300 | -1.15680200 | -1.68569900 |
| H  | 4.28216700  | -6.57932900 | -2.52969600 | H | -4.59557400 | -2.90275400 | -1.51728100 |
| O  | 0.55642200  | 3.55744000  | -1.00423700 | C | -2.74360400 | -2.12891500 | -0.79269900 |
| C  | 1.61383500  | 3.71571800  | -1.74073300 | O | -2.20691000 | -1.49559200 | 0.15531500  |
| O  | 2.39249100  | 2.81072600  | -2.09797300 | O | -2.13919200 | -2.85458900 | -1.65434500 |
| C  | 1.84212400  | 5.16834700  | -2.15783400 | O | -0.14723100 | 3.14844100  | 1.52884100  |
| H  | 0.88495800  | 5.56469200  | -2.52685900 | C | 0.49399100  | 3.00252800  | 2.62457200  |
| H  | 2.05617700  | 5.73611800  | -1.23846200 | O | 1.18350700  | 1.99614800  | 2.94392100  |
| C  | 2.95659800  | 5.36974100  | -3.18783200 | C | 0.41322700  | 4.16630400  | 3.60412600  |
| H  | 2.73352800  | 4.77562500  | -4.08567900 | H | -0.62139700 | 4.53469700  | 3.59325600  |
| H  | 3.89719300  | 4.96871500  | -2.78634700 | H | 1.01845100  | 4.97498300  | 3.16546700  |
| C  | 3.13882000  | 6.84249300  | -3.57101800 | C | 0.88586400  | 3.84301900  | 5.02184900  |



|   |             |             |            |   |             |             |             |
|---|-------------|-------------|------------|---|-------------|-------------|-------------|
| H | 0.82027200  | 4.73582000  | 5.65643400 | C | -0.37798500 | -2.08455200 | 4.75976100  |
| H | 0.27205500  | 3.05474300  | 5.47470300 | H | -0.82740500 | -1.28165000 | 5.36390600  |
| H | 1.92318800  | 3.49159700  | 5.01978100 | H | -1.13624000 | -2.86145800 | 4.60946600  |
| O | 4.22561300  | 0.02865900  | 0.27990900 | C | 0.85332900  | -2.64644200 | 5.49452800  |
| C | 4.27303400  | 0.16708400  | 1.52017100 | H | 1.59891500  | -1.84721500 | 5.59482800  |
| O | 3.25187000  | 0.32665200  | 2.29922300 | H | 1.31330300  | -3.43088900 | 4.87563200  |
| C | 5.60537700  | 0.14488200  | 2.24927600 | C | 0.49567500  | -3.21623300 | 6.87083500  |
| H | 5.65484000  | -0.75400700 | 2.87747600 | H | 0.06013200  | -2.44384400 | 7.52038600  |
| H | 5.68638500  | 1.01207200  | 2.91498100 | H | 1.38559300  | -3.61391800 | 7.37558400  |
| H | 6.43373800  | 0.13375800  | 1.53549300 | H | -0.23472200 | -4.03314200 | 6.78887700  |
| O | 0.85634700  | -0.57721900 | 3.38963000 | O | -0.04009000 | 1.09766200  | -1.68529000 |
| C | -0.02386700 | -1.49304700 | 3.40674000 | H | -0.41595800 | 0.18789700  | -1.58214900 |
| O | -0.62820000 | -1.95043200 | 2.38692700 |   |             |             |             |

**TS:**

|    |             |             |             |   |             |             |             |
|----|-------------|-------------|-------------|---|-------------|-------------|-------------|
| Ca | -2.66324700 | -0.51632600 | -1.15517000 | O | 0.82875600  | -3.39754200 | -1.33645600 |
| Mn | 0.65907800  | -1.80677600 | -0.28829800 | C | 0.00975000  | -4.03464900 | -2.11989200 |
| Mn | -1.10022800 | -1.00287400 | 1.71624900  | O | -1.15229700 | -3.70465200 | -2.40664000 |
| Mn | -0.40732600 | 1.45433200  | 0.60036300  | C | 0.63030600  | -5.30714400 | -2.70253500 |
| Mn | -1.19003500 | 3.06184500  | -1.41670100 | H | 1.58706200  | -5.02683700 | -3.16839700 |
| O  | -1.09835900 | -1.97516400 | 0.16247700  | H | 0.89997200  | -5.95527000 | -1.85414300 |
| O  | 0.48406700  | -0.35240100 | 0.93002200  | C | -0.26765400 | -6.05107700 | -3.69381800 |
| O  | -1.87141800 | 0.47489300  | 1.01721800  | H | -0.52978000 | -5.37630500 | -4.52049700 |
| O  | -0.81939200 | 1.29132600  | -1.21581300 | H | -1.21628900 | -6.30355900 | -3.20122200 |
| O  | -1.17032000 | 3.05821000  | 0.35964600  | C | 0.39382900  | -7.31995700 | -4.24288900 |
| O  | -3.62796500 | -2.72982500 | -1.74317100 | H | 1.33067700  | -7.08807000 | -4.76924600 |
| H  | -4.01821900 | -2.90585300 | -0.86665500 | H | 0.63532300  | -8.02671100 | -3.43627100 |
| H  | -2.82950000 | -3.30224000 | -1.81735000 | H | -0.26650200 | -7.83686200 | -4.95138600 |
| O  | -1.68734400 | -1.07386500 | -3.36778900 | N | 2.71481300  | -1.41850700 | -0.44180400 |
| H  | -1.79338000 | -2.04136100 | -3.45644200 | C | 3.39780700  | -1.00792800 | -1.56535600 |
| H  | -0.74457700 | -1.00841300 | -3.06573400 | H | 2.90920800  | -0.99905600 | -2.52939200 |
| O  | -1.00411500 | 3.71289600  | -3.40097300 | C | 4.67423500  | -0.63725600 | -1.21323800 |
| H  | -0.04233100 | 3.91899400  | -3.42155500 | N | 4.74818100  | -0.85044600 | 0.15886500  |
| O  | -1.34667900 | 5.02675500  | -2.32769500 | H | 5.48254300  | -0.46255000 | 0.75756200  |
| H  | -2.32109400 | 4.95877400  | -2.47531700 | C | 3.54603900  | -1.30076500 | 0.58266800  |
| O  | -4.10019600 | 1.21946300  | -1.79524600 | H | 3.29878900  | -1.50639300 | 1.61299300  |
| C  | -4.17362800 | 2.45921400  | -1.92552500 | C | 5.81301200  | -0.12346400 | -2.05533700 |
| O  | -3.18357800 | 3.27589900  | -1.81538100 | H | 6.24788000  | -0.94354900 | -2.64648400 |
| C  | -5.53892400 | 3.07521400  | -2.22834800 | H | 5.40076200  | 0.58419000  | -2.78836000 |
| H  | -5.97454200 | 2.48552100  | -3.04643900 | C | 6.97578500  | 0.55169100  | -1.28285400 |
| H  | -6.16707400 | 2.86610200  | -1.34930200 | H | 7.55712000  | -0.20107900 | -0.73861400 |
| C  | -5.54578700 | 4.56864400  | -2.55395200 | H | 7.65116100  | 1.01832000  | -2.01306200 |
| H  | -4.94814900 | 4.78379700  | -3.44951000 | C | 6.50485800  | 1.56669100  | -0.24254200 |
| H  | -5.13816300 | 5.15766500  | -1.72358900 | O | 6.40214700  | 1.25827600  | 0.95223800  |
| H  | -6.56949500 | 4.91505300  | -2.74528200 | N | 6.15170800  | 2.79312700  | -0.70648600 |

|   |             |             |             |   |             |             |             |
|---|-------------|-------------|-------------|---|-------------|-------------|-------------|
| H | 6.23321900  | 2.97689200  | -1.69875000 | O | -4.11669800 | -1.42022300 | 0.61762500  |
| C | 5.47098200  | 3.78043300  | 0.13823200  | C | -3.92255800 | -1.66638900 | 1.82770900  |
| H | 5.98943300  | 3.80026600  | 1.10280600  | O | -2.77775000 | -1.63237200 | 2.42504100  |
| H | 5.60331300  | 4.76082400  | -0.33683200 | C | -5.08967700 | -2.02684700 | 2.73005800  |
| C | 3.98153200  | 3.46920000  | 0.36291900  | H | -5.38940000 | -1.12831500 | 3.28683900  |
| H | 3.88894100  | 2.50726800  | 0.87810000  | H | -4.79634100 | -2.78765600 | 3.46082800  |
| H | 3.57262500  | 4.23099300  | 1.04211200  | H | -5.94065400 | -2.36843800 | 2.13366600  |
| C | 3.16407800  | 3.43830500  | -0.93347900 | O | -0.75483900 | -0.01852900 | 3.41875400  |
| H | 3.59669200  | 2.69897500  | -1.62679800 | C | -0.29761000 | 1.16333400  | 3.47247000  |
| H | 3.17933100  | 4.40798600  | -1.44750200 | O | -0.02258300 | 1.89867000  | 2.47008800  |
| C | 1.70461300  | 3.03050700  | -0.74654600 | C | -0.04752700 | 1.74861600  | 4.85222900  |
| O | 1.44329300  | 2.19019000  | 0.16418800  | H | 0.80053300  | 1.19922800  | 5.29022800  |
| O | 0.86278800  | 3.54257800  | -1.55032800 | H | 0.25833700  | 2.79428000  | 4.73232000  |
| O | 1.28736600  | -3.01066100 | 1.20996300  | C | -1.26830800 | 1.62737600  | 5.78127500  |
| C | 0.68402400  | -3.20175200 | 2.31419500  | H | -1.55969000 | 0.57126800  | 5.84502900  |
| O | -0.29318400 | -2.52306300 | 2.73899100  | H | -2.11767400 | 2.16063100  | 5.32925600  |
| C | 1.18396000  | -4.35870500 | 3.16939200  | C | -0.98986000 | 2.18862600  | 7.17929100  |
| H | 2.27723900  | -4.39106500 | 3.07393500  | H | -0.16354500 | 1.65181600  | 7.66643000  |
| H | 0.81634000  | -5.27544500 | 2.68200000  | H | -1.87352700 | 2.09630900  | 7.82386400  |
| C | 0.74032100  | -4.31142200 | 4.63221800  | H | -0.71677100 | 3.25225100  | 7.13755300  |
| H | 1.11466100  | -5.19089200 | 5.17121300  | O | 0.49723200  | -0.85934300 | -1.82906600 |
| H | 1.12302600  | -3.41415700 | 5.13436800  | H | 0.30609700  | 0.09379500  | -1.62807300 |
| H | -0.35185000 | -4.29210500 | 4.71054800  |   |             |             |             |

**Pro:**

|    |             |             |             |   |             |             |             |
|----|-------------|-------------|-------------|---|-------------|-------------|-------------|
| Ca | 2.68408100  | 0.24926200  | -1.03097300 | O | 3.71408000  | -1.89300700 | -1.42842800 |
| Mn | -0.58574000 | 1.87504200  | -0.43535500 | C | 3.91644400  | -3.12492800 | -1.51077600 |
| Mn | 1.04976300  | 1.14329700  | 1.69722500  | O | 2.95342400  | -3.99862800 | -1.45038700 |
| Mn | 0.28176800  | -1.36129100 | 0.75297600  | C | 5.33389700  | -3.65236300 | -1.65485700 |
| Mn | 1.17628000  | -3.08505900 | -1.09296800 | H | 5.89617500  | -2.92006500 | -2.24761000 |
| O  | 1.16313400  | 1.96759100  | 0.06567600  | H | 5.76892900  | -3.61737700 | -0.64308300 |
| O  | -0.53907400 | 0.50439800  | 0.91067600  | C | 5.45529400  | -5.06398100 | -2.23309000 |
| O  | 1.77185300  | -0.41614200 | 1.16298100  | H | 5.05193200  | -5.11319300 | -3.25326900 |
| O  | 0.66862400  | -1.29107900 | -1.02801400 | H | 4.91232000  | -5.79009400 | -1.61820800 |
| O  | 1.14182600  | -2.95228500 | 0.66264500  | H | 6.50835200  | -5.36806600 | -2.27697000 |
| O  | 3.77717000  | 2.35526200  | -1.76144900 | O | -0.60956400 | 3.39705000  | -1.58810000 |
| H  | 4.13712800  | 2.59625800  | -0.88760300 | C | 0.26955100  | 3.87641500  | -2.41840000 |
| H  | 3.00474400  | 2.94915800  | -1.92006800 | O | 1.41185700  | 3.43853800  | -2.62994200 |
| O  | 1.84634800  | 0.69117900  | -3.31811600 | C | -0.25101900 | 5.10359700  | -3.17167300 |
| H  | 2.05229900  | 1.62426000  | -3.51868800 | H | -1.15862300 | 4.79490200  | -3.71334800 |
| H  | 0.89035900  | 0.75589100  | -3.05304200 | H | -0.59505100 | 5.83036200  | -2.42038600 |
| O  | 0.83377700  | -3.49172800 | -3.20290700 | C | 0.76481400  | 5.73693900  | -4.12520400 |
| H  | -0.08610300 | -3.81766500 | -3.05724200 | H | 1.09840700  | 4.98201500  | -4.85008800 |
| O  | 1.51191900  | -4.73064300 | -3.60126900 | H | 1.66103300  | 6.02449600  | -3.55841200 |
| H  | 2.26466700  | -4.70073500 | -2.95348100 | C | 0.19580000  | 6.95577600  | -4.85992200 |

|   |             |             |             |   |             |             |             |
|---|-------------|-------------|-------------|---|-------------|-------------|-------------|
| H | -0.68397100 | 6.68602500  | -5.46139700 | O | -1.20758500 | 3.21439200  | 0.95023700  |
| H | -0.11500600 | 7.73969000  | -4.15474200 | C | -0.62740800 | 3.47016500  | 2.05303900  |
| H | 0.94019400  | 7.39397300  | -5.53751900 | O | 0.30568200  | 2.78608300  | 2.56183800  |
| N | -2.65348000 | 1.54903400  | -0.62290400 | C | -1.09693600 | 4.71423500  | 2.79566700  |
| C | -3.31264100 | 1.06331100  | -1.73073700 | H | -2.18597800 | 4.77963300  | 2.67227800  |
| H | -2.80647200 | 0.99831500  | -2.68335800 | H | -0.68384400 | 5.57146500  | 2.24111200  |
| C | -4.58882300 | 0.69436600  | -1.37751400 | C | -0.68536000 | 4.77506500  | 4.26727800  |
| N | -4.68942700 | 0.98747600  | -0.02204700 | H | -1.03553100 | 5.71064000  | 4.72147100  |
| H | -5.43001500 | 0.62533700  | 0.58574000  | H | -1.11305800 | 3.93863300  | 4.83395900  |
| C | -3.50091900 | 1.48033600  | 0.39326100  | H | 0.40341900  | 4.72143200  | 4.37276000  |
| H | -3.27185400 | 1.74488500  | 1.41440700  | O | 4.15117400  | 1.18937600  | 0.70009400  |
| C | -5.69986500 | 0.10515700  | -2.20720700 | C | 3.92225800  | 1.58709400  | 1.86579500  |
| H | -6.11392700 | 0.86935500  | -2.88217800 | O | 2.75533200  | 1.73841400  | 2.39401400  |
| H | -5.26526100 | -0.66419600 | -2.86111300 | C | 5.07965500  | 1.92348400  | 2.79034300  |
| C | -6.88897200 | -0.50163000 | -1.41995200 | H | 5.28499000  | 1.04741400  | 3.42111800  |
| H | -7.47144000 | 0.29404000  | -0.94164300 | H | 4.82195200  | 2.75708200  | 3.45140200  |
| H | -7.55376100 | -1.00551500 | -2.13503100 | H | 5.97828800  | 2.15121900  | 2.20935100  |
| C | -6.46419200 | -1.45403200 | -0.30312100 | O | 0.59728700  | 0.31808800  | 3.46068000  |
| O | -6.36611100 | -1.06402400 | 0.86819800  | C | 0.09471900  | -0.84009200 | 3.59400600  |
| N | -6.15470300 | -2.72419900 | -0.67047300 | O | -0.17762700 | -1.64549100 | 2.64712400  |
| H | -6.24037600 | -2.98188800 | -1.64562700 | C | -0.22160200 | -1.29721700 | 5.00888700  |
| C | -5.56202100 | -3.68534600 | 0.26636900  | H | -1.07754300 | -0.69939300 | 5.35993300  |
| H | -6.11651900 | -3.60895600 | 1.20801200  | H | -0.54276500 | -2.34443800 | 4.96763200  |
| H | -5.73271400 | -4.68813700 | -0.14567800 | C | 0.95979800  | -1.11326300 | 5.97695000  |
| C | -4.06812700 | -3.43803100 | 0.53230300  | H | 1.26908100  | -0.06048900 | 5.96031100  |
| H | -3.94208600 | -2.43328700 | 0.94878800  | H | 1.81733400  | -1.69771500 | 5.61183500  |
| H | -3.73794100 | -4.14335000 | 1.30856500  | C | 0.61127600  | -1.54367200 | 7.40537500  |
| C | -3.18681800 | -3.59117000 | -0.71246900 | H | -0.22460700 | -0.95296500 | 7.80624100  |
| H | -3.57577000 | -2.95204500 | -1.52248600 | H | 1.46806700  | -1.40829100 | 8.07811000  |
| H | -3.18989100 | -4.62126000 | -1.09148900 | H | 0.31937800  | -2.60239900 | 7.44557200  |
| C | -1.73337500 | -3.16603600 | -0.50996600 | O | -0.43624100 | 0.83135200  | -1.90867500 |
| O | -1.51826800 | -2.22927300 | 0.31572400  | H | -0.29973200 | -0.11170900 | -1.61269000 |
| O | -0.85425300 | -3.76185000 | -1.21734500 |   |             |             |             |

**Table S11** Reaction parameters for the closed-cubane W1 (hydroxyl)-W2 (hydroxyl) coupling:

| Spin state | Spin topology<br>(Mn1~Mn4-O6/O7) | Gibbs Free energy (a.u.) |            |            |
|------------|----------------------------------|--------------------------|------------|------------|
|            |                                  | Rea                      | TS         | Pro        |
| doublet    | $\alpha\alpha\beta\alpha$        | -3366.2140               | -3366.1577 | -3366.1748 |
|            | $\alpha\beta\alpha\beta$         | -3366.2151               | -3366.1602 | -3366.1770 |
|            | $\alpha\beta\beta\alpha$         | -3366.2169               | -3366.1789 | -3366.2272 |
|            | $\beta\alpha\alpha\beta$         | -3366.2153               | -3366.1600 | -3366.1748 |
|            | $\beta\alpha\beta\alpha$         | -3366.2156               | -3366.1778 | -3366.2259 |
|            | $\beta\beta\alpha\alpha$         | -3366.2156               | -3366.1753 | -3366.2031 |

|        |                                  |            |            |            |
|--------|----------------------------------|------------|------------|------------|
| sextet | $\alpha\alpha\beta\beta$         | -3366.2186 | -3366.1811 | -3366.2289 |
|        | $\alpha\alpha\beta\alpha\beta$   | -3366.2102 | -3366.1606 | -3366.1783 |
|        | $\alpha\beta\alpha\alpha\beta$   | -3366.2154 | -3366.1595 | -3366.1763 |
|        | $\beta\alpha\alpha\alpha\beta$   | -3366.2161 | -3366.1668 | -3366.2024 |
| octet  | $\alpha\alpha\alpha\beta\alpha$  | -3366.2185 | -3366.1622 | -3366.1804 |
|        | $\alpha\alpha\beta\alpha\alpha$  | -3366.2178 | -3366.1802 | -3366.2285 |
|        | $\alpha\beta\alpha\alpha\alpha$  | -3366.2164 | -3366.1759 | -3366.2037 |
|        | $\beta\alpha\alpha\alpha\alpha$  | -3366.2175 | -3366.1771 | -3366.2044 |
| 12-et  | $\alpha\alpha\alpha\alpha\beta$  | -3366.2186 | -3366.1635 | -3366.1790 |
| 14-et  | $\alpha\alpha\alpha\alpha\alpha$ | -3366.2193 | -3366.1786 | -3366.2065 |

| Spin state | Spin topology<br>(Mn1~Mn4-O6/O7) | Relative Gibbs Free energy (kcal/mol) |                            |                        |                        |
|------------|----------------------------------|---------------------------------------|----------------------------|------------------------|------------------------|
|            |                                  | $\Delta G^\ddagger(\text{Rea-TS})$    | $\Delta G(\text{Rea-Pro})$ | $\Delta G(\text{Rea})$ | $\Delta G(\text{Pro})$ |
| doublet    | $\alpha\alpha\beta\beta\alpha$   | 35.3                                  | 24.6                       | 3.3                    | 33.9                   |
|            | $\alpha\beta\alpha\beta\alpha$   | 34.5                                  | 23.9                       | 2.6                    | 32.6                   |
|            | $\alpha\beta\beta\alpha\alpha$   | 23.8                                  | -6.5                       | 1.5                    | 1.1                    |
|            | $\beta\alpha\alpha\beta\alpha$   | 34.7                                  | 25.4                       | 2.5                    | 33.9                   |
|            | $\beta\alpha\beta\alpha\alpha$   | 23.7                                  | -6.5                       | 2.3                    | 1.9                    |
|            | $\beta\beta\alpha\alpha\alpha$   | 25.3                                  | 7.8                        | 2.3                    | 16.2                   |
| sextet     | $\alpha\alpha\alpha\beta\beta$   | 23.5                                  | -6.5                       | 0.4                    | 0.0                    |
|            | $\alpha\alpha\beta\alpha\beta$   | 31.1                                  | 20.0                       | 5.7                    | 31.8                   |
|            | $\alpha\beta\alpha\alpha\beta$   | 35.1                                  | 24.5                       | 2.4                    | 33.0                   |
|            | $\beta\alpha\alpha\alpha\beta$   | 30.9                                  | 8.6                        | 2.0                    | 16.6                   |
| octet      | $\alpha\alpha\alpha\beta\alpha$  | 35.3                                  | 23.9                       | 0.5                    | 30.4                   |
|            | $\alpha\alpha\beta\alpha\alpha$  | 23.6                                  | -6.7                       | 0.9                    | 0.3                    |
|            | $\alpha\beta\alpha\alpha\alpha$  | 25.4                                  | 8.0                        | 1.8                    | 15.8                   |
|            | $\beta\alpha\alpha\alpha\alpha$  | 25.4                                  | 8.2                        | 1.1                    | 15.4                   |
| 12-et      | $\alpha\alpha\alpha\alpha\beta$  | 34.6                                  | 24.8                       | 0.4                    | 31.3                   |
| 14-et      | $\alpha\alpha\alpha\alpha\alpha$ | 25.5                                  | 8.0                        | 0.0                    | 14.1                   |

| Spin state  | Spin topology<br>(Mn1~Mn4-O6/O7) | Mulliken spin density |       |       |  |
|-------------|----------------------------------|-----------------------|-------|-------|--|
|             |                                  | Rea                   | TS    | Pro   |  |
| doublet     | $\alpha$ Mn1                     | 2.93                  | 2.93  | 2.93  |  |
|             | $\alpha$ Mn2                     | 2.94                  | 2.95  | 2.95  |  |
|             | $\beta$ Mn3                      | -2.86                 | -2.87 | -2.79 |  |
|             | $\beta$ Mn4                      | -2.94                 | -2.99 | -1.98 |  |
|             | $\alpha$ O6                      | 0.55                  | 0.54  | 0.01  |  |
|             | $\alpha$ O7                      | 0.54                  | 0.55  | -0.01 |  |
|             | $\alpha$ Mn1                     | 2.92                  | 2.92  | 2.92  |  |
|             | $\beta$ Mn2                      | -2.94                 | -2.93 | -2.95 |  |
|             | $\alpha$ Mn3                     | 2.80                  | 2.95  | 2.95  |  |
|             | $\beta$ Mn4                      | -2.85                 | -2.30 | -1.96 |  |
| $\alpha$ O6 | 0.55                             | 0.16                  | 0.01  |       |  |

|  |          |     |       |       |       |
|--|----------|-----|-------|-------|-------|
|  |          | O7  | 0.55  | 0.24  | 0.00  |
|  | $\alpha$ | Mn1 | 2.92  | 2.92  | 2.93  |
|  | $\beta$  | Mn2 | -2.93 | -2.93 | -2.93 |
|  | $\beta$  | Mn3 | -2.81 | -2.78 | -2.82 |
|  | $\alpha$ | Mn4 | 2.76  | 3.41  | 3.84  |
|  | $\alpha$ | O6  | 0.54  | 0.23  | 0.00  |
|  |          | O7  | 0.52  | 0.20  | 0.02  |
|  | $\beta$  | Mn1 | -2.92 | -2.92 | -2.93 |
|  | $\alpha$ | Mn2 | 2.93  | 2.94  | 2.93  |
|  | $\alpha$ | Mn3 | 2.83  | 2.96  | 2.95  |
|  | $\beta$  | Mn4 | -2.85 | -2.31 | -1.94 |
|  | $\alpha$ | O6  | 0.55  | 0.17  | 0.01  |
|  |          | O7  | 0.55  | 0.25  | 0.00  |
|  | $\beta$  | Mn1 | -2.92 | -2.92 | -2.92 |
|  | $\alpha$ | Mn2 | 2.94  | 2.95  | 2.94  |
|  | $\beta$  | Mn3 | -2.80 | -2.76 | -2.80 |
|  | $\alpha$ | Mn4 | 2.76  | 3.41  | 3.84  |
|  | $\alpha$ | O6  | 0.54  | 0.23  | 0.00  |
|  |          | O7  | 0.52  | 0.20  | 0.02  |
|  | $\beta$  | Mn1 | -2.93 | -2.93 | -2.93 |
|  | $\beta$  | Mn2 | -2.94 | -2.94 | -2.94 |
|  | $\alpha$ | Mn3 | 2.86  | 2.88  | 2.90  |
|  | $\alpha$ | Mn4 | 2.85  | 3.47  | 3.84  |
|  | $\alpha$ | O6  | 0.54  | 0.27  | 0.00  |
|  |          | O7  | 0.53  | 0.23  | -0.01 |
|  | $\alpha$ | Mn1 | 2.92  | 2.93  | 2.92  |
|  | $\alpha$ | Mn2 | 2.93  | 2.93  | 2.93  |
|  | $\alpha$ | Mn3 | 2.82  | 2.80  | 2.83  |
|  | $\beta$  | Mn4 | -2.76 | -3.41 | -3.84 |
|  | $\beta$  | O6  | -0.54 | -0.23 | 0.00  |
|  |          | O7  | -0.52 | -0.20 | -0.02 |
|  | $\alpha$ | Mn1 | 2.93  | 2.87  | 2.93  |
|  | $\alpha$ | Mn2 | 2.94  | 2.88  | 2.95  |
|  | $\beta$  | Mn3 | -2.79 | -3.59 | -2.87 |
|  | $\alpha$ | Mn4 | 2.84  | 2.70  | 1.93  |
|  | $\beta$  | O6  | -0.55 | -0.11 | -0.01 |
|  |          | O7  | -0.54 | -0.14 | 0.00  |
|  | $\alpha$ | Mn1 | 2.92  | 2.93  | 2.92  |
|  | $\beta$  | Mn2 | -2.94 | -2.94 | -2.96 |
|  | $\alpha$ | Mn3 | 2.88  | 2.88  | 2.80  |
|  | $\alpha$ | Mn4 | 2.94  | 2.97  | 1.98  |
|  | $\beta$  | O6  | -0.56 | -0.54 | -0.01 |
|  |          | O7  | -0.53 | -0.55 | 0.00  |
|  | $\beta$  | Mn1 | -2.92 | -3.56 | -3.89 |

sxtet

|       |          |          |       |       |       |
|-------|----------|----------|-------|-------|-------|
|       | $\alpha$ | Mn2      | 2.93  | 2.89  | 2.90  |
|       | $\alpha$ | Mn3      | 2.91  | 2.91  | 2.95  |
|       | $\alpha$ | Mn4      | 2.93  | 2.79  | 2.74  |
|       | $\beta$  | O6       | -0.55 | -0.25 | 0.00  |
|       |          | O7       | -0.54 | -0.19 | 0.02  |
|       | $\alpha$ | Mn1      | 2.92  | 2.93  | 2.92  |
|       | $\alpha$ | Mn2      | 2.93  | 2.93  | 2.94  |
|       | $\alpha$ | Mn3      | 2.82  | 2.98  | 3.08  |
|       | $\beta$  | Mn4      | -2.85 | -2.31 | -2.01 |
|       |          | O6       | 0.55  | 0.18  | 0.00  |
|       | $\alpha$ | O7       | 0.55  | 0.25  | 0.00  |
| octet | $\alpha$ | Mn1      | 2.93  | 2.93  | 2.94  |
|       | $\alpha$ | Mn2      | 2.94  | 2.95  | 2.94  |
|       | $\beta$  | Mn3      | -2.78 | -2.74 | -2.78 |
|       | $\alpha$ | Mn4      | 2.76  | 3.41  | 3.84  |
|       |          | O6       | 0.54  | 0.23  | 0.00  |
|       | $\alpha$ | O7       | 0.52  | 0.20  | 0.02  |
|       | $\alpha$ | Mn1      | 2.92  | 2.92  | 2.92  |
|       | $\beta$  | Mn2      | -2.93 | -2.94 | -2.93 |
|       | $\alpha$ | Mn3      | 2.87  | 2.89  | 2.92  |
|       | $\alpha$ | Mn4      | 2.85  | 3.47  | 3.84  |
|       | O6       | 0.54     | 0.27  | 0.00  |       |
|       | $\alpha$ | O7       | 0.53  | 0.23  | -0.01 |
|       | $\beta$  | Mn1      | -2.92 | -2.92 | -2.92 |
|       | $\alpha$ | Mn2      | 2.93  | 2.93  | 2.93  |
|       | $\alpha$ | Mn3      | 2.90  | 2.92  | 2.94  |
|       | $\alpha$ | Mn4      | 2.85  | 3.46  | 3.84  |
|       |          | O5       | 0.54  | 0.27  | 0.00  |
|       | $\alpha$ | O10      | 0.53  | 0.23  | -0.01 |
| 12-et | $\alpha$ | Mn1      | 2.92  | 2.93  | 2.93  |
|       | $\alpha$ | Mn2      | 2.93  | 2.93  | 2.93  |
|       | $\alpha$ | Mn3      | 2.91  | 2.92  | 2.86  |
|       | $\alpha$ | Mn4      | 2.93  | 2.99  | 1.97  |
|       |          | O6       | -0.55 | -0.54 | -0.01 |
|       | $\beta$  | O7       | -0.53 | -0.55 | 0.01  |
|       |          | $\alpha$ | Mn1   | 2.93  | 2.93  |
| 14-et | $\alpha$ | Mn2      | 2.93  | 2.93  | 2.93  |
|       | $\alpha$ | Mn3      | 2.90  | 2.92  | 2.95  |
|       | $\alpha$ | Mn4      | 2.84  | 3.46  | 3.84  |
|       |          | O6       | 0.54  | 0.27  | 0.00  |
|       | $\alpha$ | O7       | 0.53  | 0.23  | -0.01 |

**Rea:**

|    |            |             |             |    |             |             |            |
|----|------------|-------------|-------------|----|-------------|-------------|------------|
| Ca | 2.38126600 | -0.08633400 | -1.43464700 | Mn | 1.41742400  | 0.38409300  | 1.74761900 |
| Mn | 0.03121500 | 1.95823100  | -0.06910200 | Mn | -0.18716200 | -1.53658800 | 0.50786500 |

|    |             |             |             |   |             |             |             |
|----|-------------|-------------|-------------|---|-------------|-------------|-------------|
| Mn | -0.19529100 | -3.20312400 | -1.62178300 | H | -4.97371200 | 2.43058200  | 0.81298600  |
| O  | 1.72598400  | 1.49744700  | 0.34183500  | C | -2.85990400 | 2.51413500  | 0.70896400  |
| O  | -0.33046900 | 0.44386100  | 1.00645400  | H | -2.58641500 | 2.58248000  | 1.75095600  |
| O  | 1.55275900  | -1.17135300 | 0.84141400  | C | -5.31525000 | 2.32247600  | -2.01506600 |
| O  | 0.12814300  | -1.44201500 | -1.31735700 | H | -5.39674100 | 3.25545600  | -2.59275900 |
| O  | -0.16271700 | -3.28725200 | 0.15558200  | H | -5.17070100 | 1.52536900  | -2.75789100 |
| O  | 4.48555600  | 1.07080200  | -2.20573500 | C | -6.67001600 | 2.11222600  | -1.29001800 |
| H  | 4.93673500  | 0.92060200  | -1.34964300 | H | -6.94561900 | 3.01437700  | -0.73229400 |
| H  | 4.14276200  | 1.98818100  | -2.17013700 | H | -7.44619600 | 1.95042300  | -2.05048300 |
| O  | 1.66434200  | 0.67431600  | -3.75309000 | C | -6.64560600 | 0.96890600  | -0.27685300 |
| H  | 2.17004500  | 1.50777200  | -3.79359900 | O | -6.45888000 | 1.18559500  | 0.92822600  |
| H  | 0.81441200  | 0.96804800  | -3.35098200 | N | -6.77538800 | -0.28788200 | -0.77357500 |
| O  | -0.37322600 | -3.35856000 | -3.56436300 | H | -6.90670900 | -0.40343700 | -1.77078600 |
| H  | -1.34024200 | -3.31081600 | -3.71389100 | C | -6.53355400 | -1.47943900 | 0.04774400  |
| O  | -0.74204400 | -4.99039000 | -2.16759400 | H | -7.04130600 | -1.32724000 | 1.00609100  |
| H  | 0.12277100  | -5.40539800 | -2.37379500 | H | -7.01351000 | -2.32633300 | -0.45865100 |
| O  | 3.02628200  | -2.23298900 | -2.12909000 | C | -5.04025900 | -1.75314400 | 0.29560200  |
| C  | 2.74049100  | -3.43873900 | -2.06533600 | H | -4.60564600 | -0.90585000 | 0.83657100  |
| O  | 1.56596400  | -3.93526900 | -1.83778100 | H | -4.95659900 | -2.62615100 | 0.95828300  |
| C  | 3.85201000  | -4.47201900 | -2.24582900 | C | -4.24993000 | -2.00269800 | -0.99320100 |
| H  | 4.44770100  | -4.13562200 | -3.10487900 | H | -4.38942300 | -1.15680200 | -1.68569900 |
| H  | 4.50776500  | -4.36234100 | -1.36863500 | H | -4.59557400 | -2.90275400 | -1.51728100 |
| C  | 3.40865300  | -5.92581300 | -2.40861600 | C | -2.74360400 | -2.12891500 | -0.79269900 |
| H  | 2.77172800  | -6.05007100 | -3.29397800 | O | -2.20691000 | -1.49559200 | 0.15531500  |
| H  | 2.84475800  | -6.26930900 | -1.53355500 | O | -2.13919200 | -2.85458900 | -1.65434500 |
| H  | 4.28216700  | -6.57932900 | -2.52969600 | O | -0.14723100 | 3.14844100  | 1.52884100  |
| O  | 0.55642200  | 3.55744000  | -1.00423700 | C | 0.49399100  | 3.00252800  | 2.62457200  |
| C  | 1.61383500  | 3.71571800  | -1.74073300 | O | 1.18350700  | 1.99614800  | 2.94392100  |
| O  | 2.39249100  | 2.81072600  | -2.09797300 | C | 0.41322700  | 4.16630400  | 3.60412600  |
| C  | 1.84212400  | 5.16834700  | -2.15783400 | H | -0.62139700 | 4.53469700  | 3.59325600  |
| H  | 0.88495800  | 5.56469200  | -2.52685900 | H | 1.01845100  | 4.97498300  | 3.16546700  |
| H  | 2.05617700  | 5.73611800  | -1.23846200 | C | 0.88586400  | 3.84301900  | 5.02184900  |
| C  | 2.95659800  | 5.36974100  | -3.18783200 | H | 0.82027200  | 4.73582000  | 5.65643400  |
| H  | 2.73352800  | 4.77562500  | -4.08567900 | H | 0.27205500  | 3.05474300  | 5.47470300  |
| H  | 3.89719300  | 4.96871500  | -2.78634700 | H | 1.92318800  | 3.49159700  | 5.01978100  |
| C  | 3.13882000  | 6.84249300  | -3.57101800 | O | 4.22561300  | 0.02865900  | 0.27990900  |
| H  | 2.21978300  | 7.25948600  | -4.00634800 | C | 4.27303400  | 0.16708400  | 1.52017100  |
| H  | 3.39607200  | 7.45418200  | -2.69480900 | O | 3.25187000  | 0.32665200  | 2.29922300  |
| H  | 3.94201300  | 6.96370600  | -4.30927700 | C | 5.60537700  | 0.14488200  | 2.24927600  |
| N  | -2.00862300 | 2.35863300  | -0.29495800 | H | 5.65484000  | -0.75400700 | 2.87747600  |
| C  | -2.75896100 | 2.26282600  | -1.44740100 | H | 5.68638500  | 1.01207200  | 2.91498100  |
| H  | -2.27788800 | 2.11647100  | -2.40426200 | H | 6.43373800  | 0.13375800  | 1.53549300  |
| C  | -4.09386700 | 2.36519700  | -1.13319200 | O | 0.85634700  | -0.57721900 | 3.38963000  |
| N  | -4.12845800 | 2.54287000  | 0.24496300  | C | -0.02386700 | -1.49304700 | 3.40674000  |

|   |             |             |            |   |             |             |             |
|---|-------------|-------------|------------|---|-------------|-------------|-------------|
| O | -0.62820000 | -1.95043200 | 2.38692700 | C | 0.49567500  | -3.21623300 | 6.87083500  |
| C | -0.37798500 | -2.08455200 | 4.75976100 | H | 0.06013200  | -2.44384400 | 7.52038600  |
| H | -0.82740500 | -1.28165000 | 5.36390600 | H | 1.38559300  | -3.61391800 | 7.37558400  |
| H | -1.13624000 | -2.86145800 | 4.60946600 | H | -0.23472200 | -4.03314200 | 6.78887700  |
| C | 0.85332900  | -2.64644200 | 5.49452800 | O | -0.04009000 | 1.09766200  | -1.68529000 |
| H | 1.59891500  | -1.84721500 | 5.59482800 | H | -0.41595800 | 0.18789700  | -1.58214900 |
| H | 1.31330300  | -3.43088900 | 4.87563200 |   |             |             |             |

**TS:**

|    |             |             |             |   |             |             |             |
|----|-------------|-------------|-------------|---|-------------|-------------|-------------|
| Ca | -2.66324700 | -0.51632600 | -1.15517000 | C | -0.26765400 | -6.05107700 | -3.69381800 |
| Mn | 0.65907800  | -1.80677600 | -0.28829800 | H | -0.52978000 | -5.37630500 | -4.52049700 |
| Mn | -1.10022800 | -1.00287400 | 1.71624900  | H | -1.21628900 | -6.30355900 | -3.20122200 |
| Mn | -0.40732600 | 1.45433200  | 0.60036300  | C | 0.39382900  | -7.31995700 | -4.24288900 |
| Mn | -1.19003500 | 3.06184500  | -1.41670100 | H | 1.33067700  | -7.08807000 | -4.76924600 |
| O  | -1.09835900 | -1.97516400 | 0.16247700  | H | 0.63532300  | -8.02671100 | -3.43627100 |
| O  | 0.48406700  | -0.35240100 | 0.93002200  | H | -0.26650200 | -7.83686200 | -4.95138600 |
| O  | -1.87141800 | 0.47489300  | 1.01721800  | N | 2.71481300  | -1.41850700 | -0.44180400 |
| O  | -0.81939200 | 1.29132600  | -1.21581300 | C | 3.39780700  | -1.00792800 | -1.56535600 |
| O  | -1.17032000 | 3.05821000  | 0.35964600  | H | 2.90920800  | -0.99905600 | -2.52939200 |
| O  | -3.62796500 | -2.72982500 | -1.74317100 | C | 4.67423500  | -0.63725600 | -1.21323800 |
| H  | -4.01821900 | -2.90585300 | -0.86665500 | N | 4.74818100  | -0.85044600 | 0.15886500  |
| H  | -2.82950000 | -3.30224000 | -1.81735000 | H | 5.48254300  | -0.46255000 | 0.75756200  |
| O  | -1.68734400 | -1.07386500 | -3.36778900 | C | 3.54603900  | -1.30076500 | 0.58266800  |
| H  | -1.79338000 | -2.04136100 | -3.45644200 | H | 3.29878900  | -1.50639300 | 1.61299300  |
| H  | -0.74457700 | -1.00841300 | -3.06573400 | C | 5.81301200  | -0.12346400 | -2.05533700 |
| O  | -1.00411500 | 3.71289600  | -3.40097300 | H | 6.24788000  | -0.94354900 | -2.64648400 |
| H  | -0.04233100 | 3.91899400  | -3.42155500 | H | 5.40076200  | 0.58419000  | -2.78836000 |
| O  | -1.34667900 | 5.02675500  | -2.32769500 | C | 6.97578500  | 0.55169100  | -1.28285400 |
| H  | -2.32109400 | 4.95877400  | -2.47531700 | H | 7.55712000  | -0.20107900 | -0.73861400 |
| O  | -4.10019600 | 1.21946300  | -1.79524600 | H | 7.65116100  | 1.01832000  | -2.01306200 |
| C  | -4.17362800 | 2.45921400  | -1.92552500 | C | 6.50485800  | 1.56669100  | -0.24254200 |
| O  | -3.18357800 | 3.27589900  | -1.81538100 | O | 6.40214700  | 1.25827600  | 0.95223800  |
| C  | -5.53892400 | 3.07521400  | -2.22834800 | N | 6.15170800  | 2.79312700  | -0.70648600 |
| H  | -5.97454200 | 2.48552100  | -3.04643900 | H | 6.23321900  | 2.97689200  | -1.69875000 |
| H  | -6.16707400 | 2.86610200  | -1.34930200 | C | 5.47098200  | 3.78043300  | 0.13823200  |
| C  | -5.54578700 | 4.56864400  | -2.55395200 | H | 5.98943300  | 3.80026600  | 1.10280600  |
| H  | -4.94814900 | 4.78379700  | -3.44951000 | H | 5.60331300  | 4.76082400  | -0.33683200 |
| H  | -5.13816300 | 5.15766500  | -1.72358900 | C | 3.98153200  | 3.46920000  | 0.36291900  |
| H  | -6.56949500 | 4.91505300  | -2.74528200 | H | 3.88894100  | 2.50726800  | 0.87810000  |
| O  | 0.82875600  | -3.39754200 | -1.33645600 | H | 3.57262500  | 4.23099300  | 1.04211200  |
| C  | 0.00975000  | -4.03464900 | -2.11989200 | C | 3.16407800  | 3.43830500  | -0.93347900 |
| O  | -1.15229700 | -3.70465200 | -2.40664000 | H | 3.59669200  | 2.69897500  | -1.62679800 |
| C  | 0.63030600  | -5.30714400 | -2.70253500 | H | 3.17933100  | 4.40798600  | -1.44750200 |
| H  | 1.58706200  | -5.02683700 | -3.16839700 | C | 1.70461300  | 3.03050700  | -0.74654600 |
| H  | 0.89997200  | -5.95527000 | -1.85414300 | O | 1.44329300  | 2.19019000  | 0.16418800  |



|   |             |             |             |   |             |             |             |
|---|-------------|-------------|-------------|---|-------------|-------------|-------------|
| O | 0.86278800  | 3.54257800  | -1.55032800 | H | -5.94065400 | -2.36843800 | 2.13366600  |
| O | 1.28736600  | -3.01066100 | 1.20996300  | O | -0.75483900 | -0.01852900 | 3.41875400  |
| C | 0.68402400  | -3.20175200 | 2.31419500  | C | -0.29761000 | 1.16333400  | 3.47247000  |
| O | -0.29318400 | -2.52306300 | 2.73899100  | O | -0.02258300 | 1.89867000  | 2.47008800  |
| C | 1.18396000  | -4.35870500 | 3.16939200  | C | -0.04752700 | 1.74861600  | 4.85222900  |
| H | 2.27723900  | -4.39106500 | 3.07393500  | H | 0.80053300  | 1.19922800  | 5.29022800  |
| H | 0.81634000  | -5.27544500 | 2.68200000  | H | 0.25833700  | 2.79428000  | 4.73232000  |
| C | 0.74032100  | -4.31142200 | 4.63221800  | C | -1.26830800 | 1.62737600  | 5.78127500  |
| H | 1.11466100  | -5.19089200 | 5.17121300  | H | -1.55969000 | 0.57126800  | 5.84502900  |
| H | 1.12302600  | -3.41415700 | 5.13436800  | H | -2.11767400 | 2.16063100  | 5.32925600  |
| H | -0.35185000 | -4.29210500 | 4.71054800  | C | -0.98986000 | 2.18862600  | 7.17929100  |
| O | -4.11669800 | -1.42022300 | 0.61762500  | H | -0.16354500 | 1.65181600  | 7.66643000  |
| C | -3.92255800 | -1.66638900 | 1.82770900  | H | -1.87352700 | 2.09630900  | 7.82386400  |
| O | -2.77775000 | -1.63237200 | 2.42504100  | H | -0.71677100 | 3.25225100  | 7.13755300  |
| C | -5.08967700 | -2.02684700 | 2.73005800  | O | 0.49723200  | -0.85934300 | -1.82906600 |
| H | -5.38940000 | -1.12831500 | 3.28683900  | H | 0.30609700  | 0.09379500  | -1.62807300 |
| H | -4.79634100 | -2.78765600 | 3.46082800  |   |             |             |             |

**Pro:**

|    |             |             |             |   |             |             |             |
|----|-------------|-------------|-------------|---|-------------|-------------|-------------|
| Ca | 2.68408100  | 0.24926200  | -1.03097300 | C | 5.45529400  | -5.06398100 | -2.23309000 |
| Mn | -0.58574000 | 1.87504200  | -0.43535500 | H | 5.05193200  | -5.11319300 | -3.25326900 |
| Mn | 1.04976300  | 1.14329700  | 1.69722500  | H | 4.91232000  | -5.79009400 | -1.61820800 |
| Mn | 0.28176800  | -1.36129100 | 0.75297600  | H | 6.50835200  | -5.36806600 | -2.27697000 |
| Mn | 1.17628000  | -3.08505900 | -1.09296800 | O | -0.60956400 | 3.39705000  | -1.58810000 |
| O  | 1.16313400  | 1.96759100  | 0.06567600  | C | 0.26955100  | 3.87641500  | -2.41840000 |
| O  | -0.53907400 | 0.50439800  | 0.91067600  | O | 1.41185700  | 3.43853800  | -2.62994200 |
| O  | 1.77185300  | -0.41614200 | 1.16298100  | C | -0.25101900 | 5.10359700  | -3.17167300 |
| O  | 0.66862400  | -1.29107900 | -1.02801400 | H | -1.15862300 | 4.79490200  | -3.71334800 |
| O  | 1.14182600  | -2.95228500 | 0.66264500  | H | -0.59505100 | 5.83036200  | -2.42038600 |
| O  | 3.77717000  | 2.35526200  | -1.76144900 | C | 0.76481400  | 5.73693900  | -4.12520400 |
| H  | 4.13712800  | 2.59625800  | -0.88760300 | H | 1.09840700  | 4.98201500  | -4.85008800 |
| H  | 3.00474400  | 2.94915800  | -1.92006800 | H | 1.66103300  | 6.02449600  | -3.55841200 |
| O  | 1.84634800  | 0.69117900  | -3.31811600 | C | 0.19580000  | 6.95577600  | -4.85992200 |
| H  | 2.05229900  | 1.62426000  | -3.51868800 | H | -0.68397100 | 6.68602500  | -5.46139700 |
| H  | 0.89035900  | 0.75589100  | -3.05304200 | H | -0.11500600 | 7.73969000  | -4.15474200 |
| O  | 0.83377700  | -3.49172800 | -3.20290700 | H | 0.94019400  | 7.39397300  | -5.53751900 |
| H  | -0.08610300 | -3.81766500 | -3.05724200 | N | -2.65348000 | 1.54903400  | -0.62290400 |
| O  | 1.51191900  | -4.73064300 | -3.60126900 | C | -3.31264100 | 1.06331100  | -1.73073700 |
| H  | 2.26466700  | -4.70073500 | -2.95348100 | H | -2.80647200 | 0.99831500  | -2.68335800 |
| O  | 3.71408000  | -1.89300700 | -1.42842800 | C | -4.58882300 | 0.69436600  | -1.37751400 |
| C  | 3.91644400  | -3.12492800 | -1.51077600 | N | -4.68942700 | 0.98747600  | -0.02204700 |
| O  | 2.95342400  | -3.99862800 | -1.45038700 | H | -5.43001500 | 0.62533700  | 0.58574000  |
| C  | 5.33389700  | -3.65236300 | -1.65485700 | C | -3.50091900 | 1.48033600  | 0.39326100  |
| H  | 5.89617500  | -2.92006500 | -2.24761000 | H | -3.27185400 | 1.74488500  | 1.41440700  |
| H  | 5.76892900  | -3.61737700 | -0.64308300 | C | -5.69986500 | 0.10515700  | -2.20720700 |

|   |             |             |             |   |             |             |             |
|---|-------------|-------------|-------------|---|-------------|-------------|-------------|
| H | -6.11392700 | 0.86935500  | -2.88217800 | C | -0.68536000 | 4.77506500  | 4.26727800  |
| H | -5.26526100 | -0.66419600 | -2.86111300 | H | -1.03553100 | 5.71064000  | 4.72147100  |
| C | -6.88897200 | -0.50163000 | -1.41995200 | H | -1.11305800 | 3.93863300  | 4.83395900  |
| H | -7.47144000 | 0.29404000  | -0.94164300 | H | 0.40341900  | 4.72143200  | 4.37276000  |
| H | -7.55376100 | -1.00551500 | -2.13503100 | O | 4.15117400  | 1.18937600  | 0.70009400  |
| C | -6.46419200 | -1.45403200 | -0.30312100 | C | 3.92225800  | 1.58709400  | 1.86579500  |
| O | -6.36611100 | -1.06402400 | 0.86819800  | O | 2.75533200  | 1.73841400  | 2.39401400  |
| N | -6.15470300 | -2.72419900 | -0.67047300 | C | 5.07965500  | 1.92348400  | 2.79034300  |
| H | -6.24037600 | -2.98188800 | -1.64562700 | H | 5.28499000  | 1.04741400  | 3.42111800  |
| C | -5.56202100 | -3.68534600 | 0.26636900  | H | 4.82195200  | 2.75708200  | 3.45140200  |
| H | -6.11651900 | -3.60895600 | 1.20801200  | H | 5.97828800  | 2.15121900  | 2.20935100  |
| H | -5.73271400 | -4.68813700 | -0.14567800 | O | 0.59728700  | 0.31808800  | 3.46068000  |
| C | -4.06812700 | -3.43803100 | 0.53230300  | C | 0.09471900  | -0.84009200 | 3.59400600  |
| H | -3.94208600 | -2.43328700 | 0.94878800  | O | -0.17762700 | -1.64549100 | 2.64712400  |
| H | -3.73794100 | -4.14335000 | 1.30856500  | C | -0.22160200 | -1.29721700 | 5.00888700  |
| C | -3.18681800 | -3.59117000 | -0.71246900 | H | -1.07754300 | -0.69939300 | 5.35993300  |
| H | -3.57577000 | -2.95204500 | -1.52248600 | H | -0.54276500 | -2.34443800 | 4.96763200  |
| H | -3.18989100 | -4.62126000 | -1.09148900 | C | 0.95979800  | -1.11326300 | 5.97695000  |
| C | -1.73337500 | -3.16603600 | -0.50996600 | H | 1.26908100  | -0.06048900 | 5.96031100  |
| O | -1.51826800 | -2.22927300 | 0.31572400  | H | 1.81733400  | -1.69771500 | 5.61183500  |
| O | -0.85425300 | -3.76185000 | -1.21734500 | C | 0.61127600  | -1.54367200 | 7.40537500  |
| O | -1.20758500 | 3.21439200  | 0.95023700  | H | -0.22460700 | -0.95296500 | 7.80624100  |
| C | -0.62740800 | 3.47016500  | 2.05303900  | H | 1.46806700  | -1.40829100 | 8.07811000  |
| O | 0.30568200  | 2.78608300  | 2.56183800  | H | 0.31937800  | -2.60239900 | 7.44557200  |
| C | -1.09693600 | 4.71423500  | 2.79566700  | O | -0.43624100 | 0.83135200  | -1.90867500 |
| H | -2.18597800 | 4.77963300  | 2.67227800  | H | -0.29973200 | -0.11170900 | -1.61269000 |
| H | -0.68384400 | 5.57146500  | 2.24111200  |   |             |             |             |

**Table S12** Reaction parameters for the open-cubane W1 (hydroxyl)-W2 (oxo) coupling:

| Spin state | Spin topology<br>(Mn1~Mn4-O7)   | Gibbs Free energy (a.u.) |            |            |
|------------|---------------------------------|--------------------------|------------|------------|
|            |                                 | Rea                      | TS         | Pro        |
| doublet    | $\alpha\alpha\beta\alpha$       | -3365.7489               | -3365.7025 | -3365.7086 |
|            | $\alpha\beta\alpha\beta$        | -3365.7507               | -3365.7060 | -3365.7322 |
|            | $\alpha\beta\beta\alpha$        | -3365.7430               | -3365.7133 | -3365.7537 |
|            | $\beta\alpha\alpha\beta$        | -3365.7500               | -3365.7059 | -3365.7333 |
|            | $\beta\alpha\beta\alpha$        | -3365.7428               | -3365.7130 | -3365.7535 |
|            | $\beta\beta\alpha\alpha$        | \                        | \          | \          |
| sextet     | $\alpha\alpha\alpha\beta\beta$  | -3365.7441               | -3365.7143 | -3365.7554 |
|            | $\alpha\alpha\beta\alpha\beta$  | -3365.7509               | -3365.7066 | -3365.7350 |
|            | $\alpha\beta\alpha\alpha\beta$  | -3365.7496               | -3365.7025 | -3365.7102 |
|            | $\beta\alpha\alpha\alpha\beta$  | -3365.7498               | -3365.7026 | -3365.7100 |
| octet      | $\alpha\alpha\alpha\beta\alpha$ | -3365.7518               | -3365.7071 | -3365.7353 |
|            | $\alpha\alpha\beta\alpha\alpha$ | -3365.7440               | -3365.7143 | -3365.7558 |

|            | $\alpha\beta\alpha\alpha$        | \                                     | \                          | \                      |                        |
|------------|----------------------------------|---------------------------------------|----------------------------|------------------------|------------------------|
|            | $\beta\alpha\alpha\alpha$        | \                                     | \                          | \                      |                        |
| 12-et      | $\alpha\alpha\alpha\beta$        | -3365.7517                            | -3365.7049                 | -3365.7105             |                        |
| 14-et      | $\alpha\alpha\alpha\alpha$       | \                                     | \                          | \                      |                        |
| Spin state | Spin topology<br>(Mn1~Mn4-O7)    | Relative Gibbs Free energy (kcal/mol) |                            |                        |                        |
|            |                                  | $\Delta G^\ddagger(\text{Rea-TS})$    | $\Delta G(\text{Rea-Pro})$ | $\Delta G(\text{Rea})$ | $\Delta G(\text{Pro})$ |
| doublet    | $\alpha\alpha\beta\alpha$        | 29.1                                  | 25.3                       | 1.8                    | 29.6                   |
|            | $\alpha\beta\alpha\alpha$        | 28.0                                  | 11.6                       | 0.7                    | 14.8                   |
|            | $\alpha\beta\beta\alpha$         | 18.6                                  | -6.7                       | 5.5                    | 1.3                    |
|            | $\beta\alpha\alpha\beta$         | 27.7                                  | 10.5                       | 1.1                    | 14.1                   |
|            | $\beta\alpha\beta\alpha$         | 18.7                                  | -6.7                       | 5.6                    | 1.4                    |
|            | $\beta\beta\alpha\alpha$         | \                                     | \                          | \                      | \                      |
| sextet     | $\alpha\alpha\alpha\beta\beta$   | 18.7                                  | -7.1                       | 4.8                    | 0.3                    |
|            | $\alpha\alpha\beta\alpha\beta$   | 27.8                                  | 10.0                       | 0.6                    | 13.1                   |
|            | $\alpha\beta\alpha\alpha\beta$   | 29.6                                  | 24.7                       | 1.4                    | 28.6                   |
|            | $\beta\alpha\alpha\alpha\beta$   | 29.6                                  | 25.0                       | 1.3                    | 28.7                   |
| octet      | $\alpha\alpha\alpha\beta\alpha$  | 28.0                                  | 10.4                       | 0.0                    | 12.9                   |
|            | $\alpha\alpha\beta\alpha\alpha$  | 18.6                                  | -7.4                       | 4.9                    | 0.0                    |
|            | $\alpha\beta\alpha\alpha\alpha$  | \                                     | \                          | \                      | \                      |
|            | $\beta\alpha\alpha\alpha\alpha$  | \                                     | \                          | \                      | \                      |
| 12-et      | $\alpha\alpha\alpha\alpha\beta$  | 29.4                                  | 25.9                       | 0.1                    | 28.4                   |
| 14-et      | $\alpha\alpha\alpha\alpha\alpha$ | \                                     | \                          | \                      | \                      |

| Spin state   | Spin topology<br>(Mn1~Mn4-O7) | Mulliken spin density |       |       |  |
|--------------|-------------------------------|-----------------------|-------|-------|--|
|              |                               | Rea                   | TS    | Pro   |  |
| doublet      | $\alpha$ Mn1                  | 2.93                  | 2.94  | 2.94  |  |
|              | $\alpha$ Mn2                  | 2.95                  | 2.95  | 2.95  |  |
|              | $\beta$ Mn3                   | -2.80                 | -2.81 | -2.84 |  |
|              | $\beta$ Mn4                   | -2.28                 | -2.55 | -1.99 |  |
|              | O6                            | 0.03                  | 0.40  | 0.00  |  |
|              | $\alpha$ O7                   | 0.15                  | 0.14  | -0.02 |  |
|              | $\alpha$ Mn1                  | 2.93                  | 2.93  | 2.93  |  |
|              | $\beta$ Mn2                   | -2.93                 | -2.92 | -2.81 |  |
|              | $\alpha$ Mn3                  | 2.82                  | 2.92  | 3.81  |  |
|              | $\beta$ Mn4                   | -2.33                 | -2.53 | -2.74 |  |
|              | O6                            | -0.01                 | 0.39  | 0.01  |  |
|              | $\alpha$ O7                   | 0.36                  | 0.16  | -0.01 |  |
|              | $\alpha$ Mn1                  | 2.92                  | 2.93  | 2.93  |  |
|              | $\beta$ Mn2                   | -2.94                 | -2.94 | -2.93 |  |
| $\beta$ Mn3  | -2.85                         | -2.83                 | -2.82 |       |  |
| $\alpha$ Mn4 | 2.72                          | 2.86                  | 3.88  |       |  |
| O6           | 0.27                          | 0.44                  | 0.01  |       |  |
| $\alpha$     |                               | 83                    |       |       |  |

|  |          |          |       |       |       |      |
|--|----------|----------|-------|-------|-------|------|
|  |          | O7       | 0.95  | 0.69  | -0.04 |      |
|  | $\beta$  | Mn1      | -2.92 | -2.93 | -2.88 |      |
|  | $\alpha$ | Mn2      | 2.94  | 2.93  | 2.97  |      |
|  | $\alpha$ | Mn3      | 2.86  | 2.93  | 3.81  |      |
|  | $\beta$  | Mn4      | -2.37 | -2.51 | -2.75 |      |
|  |          | O6       | -0.01 | 0.38  | 0.01  |      |
|  | $\alpha$ | O7       | 0.41  | 0.15  | -0.01 |      |
|  | $\beta$  | Mn1      | -2.93 | -2.93 | -2.93 |      |
|  | $\alpha$ | Mn2      | 2.93  | 2.93  | 2.93  |      |
|  | $\beta$  | Mn3      | -2.81 | -2.80 | -2.79 |      |
|  | $\alpha$ | Mn4      | 2.72  | 2.86  | 3.88  |      |
|  |          | O6       | 0.27  | 0.44  | 0.01  |      |
|  | $\alpha$ | O7       | 0.95  | 0.69  | -0.04 |      |
|  | $\beta$  | Mn1      | \     | \     | \     |      |
|  | $\beta$  | Mn2      | \     | \     | \     |      |
|  | $\alpha$ | Mn3      | \     | \     | \     |      |
|  | $\alpha$ | Mn4      | \     | \     | \     |      |
|  |          | O6       | \     | \     | \     |      |
|  | $\alpha$ | O7       | \     | \     | \     |      |
|  | $\alpha$ | Mn1      | 2.95  | 2.95  | 2.95  |      |
|  | $\alpha$ | Mn2      | 2.96  | 2.96  | 2.95  |      |
|  | $\alpha$ | Mn3      | 2.85  | 2.84  | 2.82  |      |
|  | $\beta$  | Mn4      | -2.72 | -2.86 | -3.88 |      |
|  |          | O6       | -0.27 | -0.44 | -0.01 |      |
|  | $\beta$  | O7       | -0.95 | -0.69 | 0.04  |      |
|  | $\alpha$ | Mn1      | 2.94  | 2.94  | 2.92  |      |
|  | $\alpha$ | Mn2      | 2.95  | 2.94  | 2.82  |      |
|  | $\beta$  | Mn3      | -2.82 | -2.93 | -3.80 |      |
|  | $\alpha$ | Mn4      | 2.34  | 2.57  | 2.75  |      |
|  |          | O6       | 0.01  | -0.39 | -0.01 |      |
|  | $\beta$  | O7       | -0.38 | -0.18 | 0.01  |      |
|  | $\alpha$ | Mn1      | 2.93  | 2.93  | 2.93  |      |
|  | $\beta$  | Mn2      | -2.92 | -2.93 | -2.93 |      |
|  | $\alpha$ | Mn3      | 2.80  | 2.81  | 2.84  |      |
|  | $\alpha$ | Mn4      | 2.29  | 2.56  | 1.99  |      |
|  |          | O6       | -0.03 | -0.40 | 0.00  |      |
|  | $\beta$  | O7       | -0.15 | -0.15 | 0.02  |      |
|  | $\beta$  | Mn1      | -2.92 | -2.92 | -2.92 |      |
|  | $\alpha$ | Mn2      | 2.93  | 2.93  | 2.93  |      |
|  | $\alpha$ | Mn3      | 2.84  | 2.85  | 2.88  |      |
|  | $\alpha$ | Mn4      | 2.31  | 2.55  | 1.99  |      |
|  |          | O6       | -0.02 | -0.40 | 0.00  |      |
|  | $\beta$  | O7       | -0.18 | -0.15 | 0.02  |      |
|  | octet    | $\alpha$ | Mn1   | 2.95  | 2.95  | 2.91 |

|  |          |     |       |       |       |
|--|----------|-----|-------|-------|-------|
|  | $\alpha$ | Mn2 | 2.96  | 2.96  | 2.97  |
|  | $\alpha$ | Mn3 | 2.86  | 2.93  | 3.82  |
|  | $\beta$  | Mn4 | -2.36 | -2.51 | -2.74 |
|  |          | O6  | -0.01 | 0.38  | 0.01  |
|  | $\alpha$ | O7  | 0.40  | 0.14  | -0.01 |
|  | $\alpha$ | Mn1 | 2.94  | 2.95  | 2.94  |
|  | $\alpha$ | Mn2 | 2.95  | 2.95  | 2.95  |
|  | $\beta$  | Mn3 | -2.81 | -2.79 | -2.78 |
|  | $\alpha$ | Mn4 | 2.72  | 2.87  | 3.88  |
|  |          | O6  | 0.27  | 0.44  | 0.01  |
|  | $\alpha$ | O7  | 0.95  | 0.69  | -0.04 |
|  | $\alpha$ | Mn1 | \     | \     | \     |
|  | $\beta$  | Mn2 | \     | \     | \     |
|  | $\alpha$ | Mn3 | \     | \     | \     |
|  | $\alpha$ | Mn4 | \     | \     | \     |
|  |          | O6  | \     | \     | \     |
|  | $\alpha$ | O7  | \     | \     | \     |
|  | $\beta$  | Mn1 | \     | \     | \     |
|  | $\alpha$ | Mn2 | \     | \     | \     |
|  | $\alpha$ | Mn3 | \     | \     | \     |
|  | $\alpha$ | Mn4 | \     | \     | \     |
|  |          | O6  | \     | \     | \     |
|  | $\alpha$ | O7  | \     | \     | \     |
|  | $\alpha$ | Mn1 | 2.95  | 2.95  | 2.95  |
|  | $\alpha$ | Mn2 | 2.96  | 2.96  | 2.95  |
|  | $\alpha$ | Mn3 | 2.84  | 2.85  | 2.88  |
|  | $\alpha$ | Mn4 | 2.31  | 2.55  | 1.99  |
|  |          | O6  | -0.03 | -0.40 | 0.00  |
|  | $\beta$  | O7  | -0.17 | -0.15 | 0.02  |
|  | $\alpha$ | Mn1 | \     | \     | \     |
|  | $\alpha$ | Mn2 | \     | \     | \     |
|  | $\alpha$ | Mn3 | \     | \     | \     |
|  | $\alpha$ | Mn4 | \     | \     | \     |
|  |          | O6  | \     | \     | \     |
|  | $\alpha$ | O7  | \     | \     | \     |

'\' denotes TSs for some spin states do not exist due to the failure of IRC verification on reactants concerning W1 returning back to Mn4.

**Rea:**

|    |             |             |             |   |             |             |             |
|----|-------------|-------------|-------------|---|-------------|-------------|-------------|
| Ca | 2.57709900  | 0.80882000  | -1.16354000 | O | -0.46468500 | 0.28305800  | 1.00245100  |
| Mn | -0.71493700 | 1.80636700  | -0.01666500 | O | 1.96085400  | -0.48928500 | 0.91955700  |
| Mn | 1.12649100  | 0.81882200  | 1.79769800  | O | 0.90875700  | -1.03815700 | -1.38398400 |
| Mn | 0.56262400  | -1.54538000 | 0.33706900  | O | 1.30499900  | -3.03921200 | -0.07656300 |
| Mn | 1.31651500  | -2.78232200 | -2.00381200 | O | 3.38465900  | 3.19919200  | -1.29433900 |
| O  | 1.03969800  | 2.01562000  | 0.38604800  | H | 3.71903500  | 3.14368700  | -0.37831900 |

|   |             |             |             |   |             |             |             |
|---|-------------|-------------|-------------|---|-------------|-------------|-------------|
| H | 2.53341000  | 3.69535000  | -1.25359900 | C | -6.39366100 | -1.88294500 | -0.42495600 |
| O | 1.49520000  | 1.83074900  | -3.17072100 | O | -6.36843600 | -1.78587300 | 0.80874400  |
| H | 1.45963400  | 2.78675200  | -2.95349200 | N | -5.92954000 | -2.97632400 | -1.08477400 |
| H | 0.58180200  | 1.54507300  | -2.91327300 | H | -5.89007300 | -2.93775800 | -2.09626100 |
| O | 1.31274000  | -2.33672200 | -3.71711500 | C | -5.16492000 | -4.03160700 | -0.40920300 |
| O | 1.56191100  | -4.47101600 | -2.68849500 | H | -5.66558500 | -4.22475600 | 0.54540100  |
| H | 2.53598100  | -4.53723100 | -2.74461200 | H | -5.24807200 | -4.93690200 | -1.02535200 |
| O | 4.11160700  | -0.67756700 | -2.10587800 | C | -3.69387600 | -3.66351500 | -0.16090900 |
| C | 4.23510700  | -1.92322200 | -2.08447900 | H | -3.64647600 | -2.78212900 | 0.48785100  |
| O | 3.30511100  | -2.78727100 | -1.92704500 | H | -3.22652100 | -4.48721100 | 0.39831400  |
| C | 5.65129000  | -2.49409300 | -2.22562000 | C | -2.89737800 | -3.39519000 | -1.44226100 |
| H | 6.11379200  | -1.97433300 | -3.07616100 | H | -3.37862900 | -2.59297300 | -2.02452300 |
| H | 6.20674000  | -2.16031900 | -1.33605800 | H | -2.85000900 | -4.27957200 | -2.09021500 |
| C | 5.74791400  | -4.01126600 | -2.38427500 | C | -1.46502200 | -2.92418200 | -1.18431100 |
| H | 5.22497400  | -4.34757700 | -3.28910400 | O | -1.26867200 | -2.22898900 | -0.14411300 |
| H | 5.29550900  | -4.52546900 | -1.52850700 | O | -0.61569800 | -3.24667700 | -2.06463200 |
| H | 6.79753800  | -4.32756100 | -2.46336700 | O | -1.35683100 | 2.82857400  | 1.63334600  |
| O | -1.03417000 | 3.54085600  | -0.88509300 | C | -0.72133200 | 2.89180500  | 2.73382600  |
| C | -0.30128600 | 4.39385800  | -1.51158200 | O | 0.29367800  | 2.21301200  | 3.04555300  |
| O | 0.89853200  | 4.27802400  | -1.83625100 | C | -1.24318800 | 3.90841300  | 3.74898500  |
| C | -1.05738100 | 5.68293700  | -1.86860600 | H | -2.34036000 | 3.88882500  | 3.70307900  |
| H | -2.01172300 | 5.39337100  | -2.33315400 | H | -0.94666000 | 4.89950900  | 3.37118300  |
| H | -1.33064000 | 6.17008100  | -0.91878600 | C | -0.73202300 | 3.70220000  | 5.17541900  |
| C | -0.27884200 | 6.64777800  | -2.76535500 | H | -1.11924300 | 4.48532300  | 5.84146900  |
| H | -0.01241000 | 6.13561500  | -3.70055700 | H | -1.04660400 | 2.72823900  | 5.57102200  |
| H | 0.67497000  | 6.89595600  | -2.28141600 | H | 0.36259100  | 3.72576300  | 5.20351800  |
| C | -1.06274200 | 7.92812700  | -3.07579000 | O | 4.10847200  | 1.51588800  | 0.70405700  |
| H | -2.00887300 | 7.70431000  | -3.58994700 | C | 3.93988900  | 1.56138400  | 1.94472400  |
| H | -1.31196700 | 8.47733400  | -2.15598800 | O | 2.81879000  | 1.44860500  | 2.56198700  |
| H | -0.48579100 | 8.60480300  | -3.72114600 | C | 5.14893600  | 1.74918300  | 2.85261100  |
| N | -2.78349600 | 1.34824400  | -0.17553900 | H | 5.52065000  | 0.75579900  | 3.14058400  |
| C | -3.45731200 | 1.07096700  | -1.34184000 | H | 4.87452300  | 2.28500100  | 3.76717000  |
| H | -2.97791700 | 1.23312200  | -2.29709300 | H | 5.94810100  | 2.27364200  | 2.31897700  |
| C | -4.69754000 | 0.55826100  | -1.04550400 | O | 0.86260600  | -0.35541900 | 3.38108200  |
| N | -4.76228600 | 0.54535000  | 0.34535300  | C | 0.44034500  | -1.55480300 | 3.29282400  |
| H | -5.45573400 | 0.02310800  | 0.88325400  | O | 0.15796100  | -2.17249500 | 2.22958100  |
| C | -3.58088300 | 1.01025600  | 0.82248700  | C | 0.23800300  | -2.29961500 | 4.60942800  |
| H | -3.32163700 | 1.06318900  | 1.86956000  | H | 0.71811200  | -1.72336800 | 5.40983100  |
| C | -5.80574300 | 0.10273000  | -1.95763300 | H | -0.84517100 | -2.30202600 | 4.81521300  |
| H | -6.29236600 | 0.96958600  | -2.43128400 | C | 0.75423600  | -3.74519700 | 4.57062100  |
| H | -5.35429400 | -0.46795600 | -2.78199100 | H | 1.83450000  | -3.73583900 | 4.36302700  |
| C | -6.92172700 | -0.74194600 | -1.29521200 | H | 0.28593100  | -4.26279600 | 3.72447000  |
| H | -7.53413100 | -0.11416800 | -0.63797400 | C | 0.48482100  | -4.50052700 | 5.87633800  |
| H | -7.58081300 | -1.12870000 | -2.08536900 | H | 0.96644400  | -4.00757500 | 6.73335400  |

|            |             |             |             |   |             |             |             |
|------------|-------------|-------------|-------------|---|-------------|-------------|-------------|
| H          | 0.86609100  | -5.52951400 | 5.82639000  | O | -0.57875200 | 1.05833600  | -1.65776000 |
| H          | -0.59282000 | -4.55422600 | 6.09006800  | H | -0.22862200 | 0.11750000  | -1.59963200 |
| <b>TS:</b> |             |             |             |   |             |             |             |
| Ca         | 2.64764800  | 0.92744400  | -0.97979200 | H | -0.67648000 | 8.58061500  | -3.74625400 |
| Mn         | -0.82290200 | 1.77482300  | -0.05595000 | N | -2.86215000 | 1.23193300  | -0.32461000 |
| Mn         | 0.95021500  | 0.84280500  | 1.85085000  | C | -3.45232500 | 0.88399400  | -1.51733400 |
| Mn         | 0.57712800  | -1.52859500 | 0.34040300  | H | -2.92133000 | 1.02992000  | -2.44755600 |
| Mn         | 1.58491100  | -2.61918300 | -1.93134200 | C | -4.68880400 | 0.33473300  | -1.27556400 |
| O          | 0.89743300  | 2.04785400  | 0.44708300  | N | -4.83890200 | 0.37294200  | 0.10788300  |
| O          | -0.56429400 | 0.24581100  | 0.95638700  | H | -5.54403000 | -0.15657600 | 0.62351100  |
| O          | 1.89312900  | -0.41351500 | 1.01008800  | C | -3.70754200 | 0.90154400  | 0.63620600  |
| O          | 1.01336800  | -0.97051100 | -1.37489500 | H | -3.51779100 | 1.00752600  | 1.69392800  |
| O          | 1.45614800  | -2.95682400 | -0.03698700 | C | -5.72106300 | -0.20076600 | -2.23233100 |
| O          | 3.26938000  | 3.37356300  | -1.03601200 | H | -6.21097500 | 0.62639600  | -2.76932000 |
| H          | 3.54094500  | 3.33609600  | -0.09892100 | H | -5.19842100 | -0.78417700 | -3.00392900 |
| H          | 2.38614300  | 3.81187600  | -1.05615300 | C | -6.84194400 | -1.06441600 | -1.60277100 |
| O          | 1.59465200  | 1.88242200  | -3.03037800 | H | -7.51774800 | -0.43711900 | -1.01039000 |
| H          | 1.52503000  | 2.84252600  | -2.84561600 | H | -7.43539800 | -1.50921500 | -2.41409200 |
| H          | 0.67454400  | 1.58103900  | -2.81182100 | C | -6.32261600 | -2.14687000 | -0.65561800 |
| O          | 1.81400200  | -2.81717800 | -3.65148200 | O | -6.37194800 | -1.99709900 | 0.57225500  |
| O          | 2.18639800  | -4.38779200 | -2.68970100 | N | -5.78053200 | -3.24654100 | -1.24100900 |
| H          | 3.14966600  | -4.19130400 | -2.64594000 | H | -5.68293200 | -3.24427100 | -2.24938800 |
| O          | 4.40156700  | -0.33045700 | -1.87110400 | C | -4.99854000 | -4.23142500 | -0.48359500 |
| C          | 4.62129100  | -1.57119300 | -1.92219900 | H | -5.51848100 | -4.38247200 | 0.46808300  |
| O          | 3.76257900  | -2.49139800 | -1.74862700 | H | -5.03442300 | -5.17534700 | -1.04408100 |
| C          | 6.06957200  | -2.00348700 | -2.19099100 | C | -3.54760400 | -3.79464800 | -0.22608300 |
| H          | 6.42034100  | -1.42037900 | -3.05410500 | H | -3.54655600 | -2.87509000 | 0.36946000  |
| H          | 6.66448700  | -1.65054800 | -1.33483600 | H | -3.06422300 | -4.56535500 | 0.39205900  |
| C          | 6.27933200  | -3.50108200 | -2.41400000 | C | -2.73115900 | -3.57340500 | -1.50361500 |
| H          | 5.72205000  | -3.85051300 | -3.29309700 | H | -3.22840100 | -2.82632000 | -2.14353400 |
| H          | 5.93088100  | -4.07904200 | -1.54993200 | H | -2.64154300 | -4.49277900 | -2.09678400 |
| H          | 7.34259500  | -3.72837700 | -2.57628200 | C | -1.31513500 | -3.03816400 | -1.25917500 |
| O          | -1.16410800 | 3.49790200  | -0.92829300 | O | -1.17183200 | -2.29231600 | -0.23175100 |
| C          | -0.43908700 | 4.37422100  | -1.53335300 | O | -0.43725100 | -3.34028500 | -2.10209900 |
| O          | 0.78351100  | 4.31865900  | -1.77493100 | O | -1.59694900 | 2.75286700  | 1.55865300  |
| C          | -1.24355000 | 5.60334700  | -1.98349500 | C | -1.03456000 | 2.82547700  | 2.69821200  |
| H          | -2.09704400 | 5.24109800  | -2.57678200 | O | -0.01752900 | 2.17932500  | 3.06525300  |
| H          | -1.68592400 | 6.05206100  | -1.08022900 | C | -1.65657000 | 3.80986700  | 3.68789400  |
| C          | -0.43462600 | 6.64001800  | -2.76569600 | H | -2.74737500 | 3.74864300  | 3.57499700  |
| H          | 0.00379700  | 6.16085500  | -3.65183400 | H | -1.37688800 | 4.81559000  | 3.33692700  |
| H          | 0.41700400  | 6.96719100  | -2.15418200 | C | -1.22504700 | 3.60814300  | 5.14100500  |
| C          | -1.27655300 | 7.85014700  | -3.18634500 | H | -1.68262000 | 4.36844400  | 5.78852200  |
| H          | -2.11784700 | 7.54937700  | -3.82770800 | H | -1.52439100 | 2.61854100  | 5.50856600  |
| H          | -1.69954300 | 8.36681100  | -2.31235400 | H | -0.13595700 | 3.67415100  | 5.23614400  |

|   |            |             |            |   |             |             |             |
|---|------------|-------------|------------|---|-------------|-------------|-------------|
| O | 3.97220500 | 1.70610000  | 0.99506600 | H | 0.39168400  | -1.76707500 | 5.39872800  |
| C | 3.70968500 | 1.71349200  | 2.21949500 | H | -1.04563700 | -2.48866800 | 4.65531900  |
| O | 2.55149800 | 1.53130700  | 2.74561500 | C | 0.70901700  | -3.75716000 | 4.54316200  |
| C | 4.83566500 | 1.93755900  | 3.22049300 | H | 1.79670700  | -3.63436100 | 4.43375800  |
| H | 5.24504900 | 0.95728000  | 3.50214400 | H | 0.37179200  | -4.30255400 | 3.65315600  |
| H | 4.46462600 | 2.42325400  | 4.12883200 | C | 0.40423800  | -4.56120400 | 5.81140500  |
| H | 5.63839900 | 2.52561600  | 2.76410500 | H | 0.75596300  | -4.03914900 | 6.71311600  |
| O | 0.64144100 | -0.36967000 | 3.40112200 | H | 0.89161200  | -5.54520400 | 5.78450000  |
| C | 0.29183000 | -1.58575200 | 3.26785000 | H | -0.67685000 | -4.72743200 | 5.92708100  |
| O | 0.11406500 | -2.20021400 | 2.17775900 | O | -0.57662200 | 1.05258300  | -1.70027300 |
| C | 0.04546800 | -2.37163400 | 4.55163600 | H | -0.20314700 | 0.12787700  | -1.63000900 |

**Pro:**

|    |             |             |             |   |             |             |             |
|----|-------------|-------------|-------------|---|-------------|-------------|-------------|
| Ca | 2.78060200  | 0.42865700  | -0.83334200 | C | -0.13740500 | 5.67831600  | -2.23670800 |
| Mn | -0.52229900 | 1.94207100  | -0.13835500 | H | -0.94350500 | 5.42333100  | -2.94280700 |
| Mn | 0.96313700  | 0.78752400  | 1.88988000  | H | -0.63000500 | 6.21844300  | -1.41408100 |
| Mn | 0.29138400  | -1.53079600 | 0.40534700  | C | 0.91821500  | 6.55384500  | -2.91488000 |
| Mn | 1.22597400  | -2.87502400 | -1.75387700 | H | 1.40333400  | 5.97723700  | -3.71373600 |
| O  | 1.19066600  | 1.93241000  | 0.45512800  | H | 1.71285400  | 6.78536200  | -2.19210100 |
| O  | -0.57748300 | 0.40955800  | 0.92244600  | C | 0.33236100  | 7.85173000  | -3.48280200 |
| O  | 1.73194700  | -0.62750800 | 1.13924100  | H | -0.44297800 | 7.64492500  | -4.23493700 |
| O  | 0.81289600  | -1.06130400 | -1.26514500 | H | -0.13158800 | 8.46118100  | -2.69348300 |
| O  | 1.06403100  | -3.06282200 | 0.10712600  | H | 1.10707600  | 8.46453000  | -3.96407300 |
| O  | 3.84513600  | 2.71778000  | -0.95275700 | N | -2.61326000 | 1.71500700  | -0.50273100 |
| H  | 4.05564500  | 2.66957300  | 0.00003300  | C | -3.17819800 | 1.35031000  | -1.70293300 |
| H  | 3.05255000  | 3.30012000  | -1.03488600 | H | -2.58266400 | 1.35723300  | -2.60501900 |
| O  | 2.05052800  | 1.47173300  | -2.97924700 | C | -4.48283600 | 0.96899800  | -1.50094600 |
| H  | 2.14927300  | 2.43569400  | -2.83338700 | N | -4.70078100 | 1.12854900  | -0.13545300 |
| H  | 1.07888100  | 1.36020700  | -2.80876600 | H | -5.49334500 | 0.72816500  | 0.36985900  |
| O  | 1.34695100  | -2.76543900 | -3.60602600 | C | -3.54328800 | 1.55966100  | 0.42411800  |
| O  | 1.55275800  | -4.21003300 | -3.60319700 | H | -3.39760100 | 1.72119700  | 1.48177500  |
| H  | 2.51577700  | -4.24762900 | -3.39479400 | C | -5.51537800 | 0.47912200  | -2.48168600 |
| O  | 4.13229100  | -1.37152300 | -1.50427100 | H | -5.84698100 | 1.30445000  | -3.13080500 |
| C  | 4.25501600  | -2.60987900 | -1.68509300 | H | -5.03213400 | -0.24677500 | -3.15160600 |
| O  | 3.29684100  | -3.45007200 | -1.77630700 | C | -6.78625600 | -0.15619700 | -1.86690700 |
| C  | 5.68096400  | -3.16477900 | -1.77921700 | H | -7.39006400 | 0.60982900  | -1.36691100 |
| H  | 6.25777900  | -2.47468100 | -2.40984400 | H | -7.39493700 | -0.57215300 | -2.68231900 |
| H  | 6.11190400  | -3.07415200 | -0.76994000 | C | -6.49245800 | -1.22592500 | -0.81431700 |
| C  | 5.79456900  | -4.60512700 | -2.27965900 | O | -6.56904800 | -0.97027000 | 0.39456600  |
| H  | 5.40883500  | -4.70058000 | -3.30356200 | N | -6.11996400 | -2.44480700 | -1.28602700 |
| H  | 5.21605500  | -5.28585000 | -1.64503900 | H | -5.97867800 | -2.54074500 | -2.28459300 |
| H  | 6.84238600  | -4.93682700 | -2.28320700 | C | -5.55461400 | -3.48191300 | -0.41454100 |
| O  | -0.49922900 | 3.68268300  | -1.03836400 | H | -6.12016800 | -3.44531600 | 0.52220700  |
| C  | 0.40126700  | 4.35705100  | -1.66574300 | H | -5.74986900 | -4.45190400 | -0.89196900 |
| O  | 1.59741900  | 4.05287200  | -1.84908800 | C | -4.05618200 | -3.29224700 | -0.13120500 |



|   |             |             |             |   |             |             |             |
|---|-------------|-------------|-------------|---|-------------|-------------|-------------|
| H | -3.90116100 | -2.32196400 | 0.35323100  | O | 2.62463200  | 1.23786700  | 2.84265800  |
| H | -3.74690900 | -4.05584000 | 0.59783400  | C | 4.91758800  | 1.24653000  | 3.43367000  |
| C | -3.16823000 | -3.38285200 | -1.37683500 | H | 5.13830100  | 0.22187600  | 3.76436800  |
| H | -3.52336900 | -2.67672200 | -2.14564800 | H | 4.59167900  | 1.82185700  | 4.30619000  |
| H | -3.19695500 | -4.38296200 | -1.82863800 | H | 5.83139900  | 1.67177500  | 3.00594300  |
| C | -1.69752900 | -3.01921000 | -1.13052300 | O | 0.38652500  | -0.30822500 | 3.45046000  |
| O | -1.49715400 | -2.14760100 | -0.21523100 | C | -0.12658400 | -1.46855200 | 3.33394200  |
| O | -0.83770900 | -3.56179300 | -1.86450600 | O | -0.34181300 | -2.08963300 | 2.25658000  |
| O | -1.21770400 | 3.07397700  | 1.42108600  | C | -0.54368900 | -2.15555500 | 4.63199600  |
| C | -0.70469100 | 3.09272600  | 2.58494800  | H | -0.08824100 | -1.61376200 | 5.47007900  |
| O | 0.17685400  | 2.30391700  | 3.01901300  | H | -1.63582000 | -2.03451000 | 4.72352700  |
| C | -1.20327900 | 4.19550200  | 3.51858600  | C | -0.18904000 | -3.64865900 | 4.66993300  |
| H | -2.28287600 | 4.30882400  | 3.35114500  | H | 0.90094400  | -3.76217900 | 4.57439200  |
| H | -0.74652100 | 5.13114900  | 3.15961900  | H | -0.62400300 | -4.13586800 | 3.78862500  |
| C | -0.87980700 | 3.97186300  | 4.99637100  | C | -0.67040100 | -4.33453100 | 5.95293600  |
| H | -1.23635300 | 4.81617400  | 5.60213700  | H | -0.22589400 | -3.87334900 | 6.84688600  |
| H | -1.35425700 | 3.05591000  | 5.37054700  | H | -0.40230700 | -5.39984900 | 5.95951300  |
| H | 0.19966800  | 3.86247800  | 5.14575800  | H | -1.76335600 | -4.26503700 | 6.05559100  |
| O | 4.14212100  | 1.06385600  | 1.17242700  | O | -0.32161600 | 1.16213500  | -1.75231900 |
| C | 3.81989700  | 1.18030800  | 2.37882600  | H | -0.09947700 | 0.18465900  | -1.62379600 |

**Table S13** Reaction parameters for the closed-cubane W1 (hydroxyl)-W2 (oxo) coupling:

| Spin state | Spin topology<br>(Mn1~Mn4-O7)    | Gibbs Free energy (a.u.) |            |            |
|------------|----------------------------------|--------------------------|------------|------------|
|            |                                  | Rea                      | TS         | Pro        |
| doublet    | $\alpha\alpha\beta\alpha$        | -3365.7378               | -3365.7022 | -3365.7141 |
|            | $\alpha\beta\alpha\beta$         | -3365.7390               | -3365.7026 | -3365.7149 |
|            | $\alpha\beta\beta\alpha\alpha$   | \                        | \          | \          |
|            | $\beta\alpha\alpha\beta\alpha$   | -3365.7417               | -3365.7061 | -3365.7159 |
|            | $\beta\alpha\beta\alpha\alpha$   | \                        | \          | \          |
|            | $\beta\beta\alpha\alpha\alpha$   | \                        | \          | \          |
| sextet     | $\alpha\alpha\alpha\beta\beta$   | \                        | \          | \          |
|            | $\alpha\alpha\beta\alpha\beta$   | -3365.7407               | -3365.7051 | -3365.7168 |
|            | $\alpha\beta\alpha\alpha\beta$   | -3365.7367               | -3365.7002 | -3365.7246 |
|            | $\beta\alpha\alpha\alpha\beta$   | -3365.7389               | -3365.7045 | -3365.7166 |
| octet      | $\alpha\alpha\alpha\beta\alpha$  | -3365.7433               | -3365.7063 | -3365.7182 |
|            | $\alpha\alpha\beta\alpha\alpha$  | \                        | \          | \          |
|            | $\alpha\beta\alpha\alpha\alpha$  | \                        | \          | \          |
|            | $\beta\alpha\alpha\alpha\alpha$  | \                        | \          | \          |
| 12-et      | $\alpha\alpha\alpha\alpha\beta$  | -3365.7417               | -3365.7053 | -3365.7176 |
| 14-et      | $\alpha\alpha\alpha\alpha\alpha$ | \                        | \          | \          |

  

| Spin state | Spin topology<br>(Mn1~Mn4-O7)    | Relative Gibbs Free energy (kcal/mol) |                      |                  |                  |
|------------|----------------------------------|---------------------------------------|----------------------|------------------|------------------|
|            |                                  | $\Delta G^\ddagger$ (Rea-TS)          | $\Delta G$ (Rea-Pro) | $\Delta G$ (Rea) | $\Delta G$ (Pro) |
| doublet    | $\alpha\alpha\beta\alpha$        | 0.0000                                | 0.0000               | 0.0000           | 0.0000           |
| doublet    | $\alpha\beta\alpha\beta$         | 0.0000                                | 0.0000               | 0.0000           | 0.0000           |
| doublet    | $\alpha\beta\beta\alpha\alpha$   | \                                     | \                    | \                | \                |
| doublet    | $\beta\alpha\alpha\beta\alpha$   | 0.0000                                | 0.0000               | 0.0000           | 0.0000           |
| doublet    | $\beta\alpha\beta\alpha\alpha$   | \                                     | \                    | \                | \                |
| doublet    | $\beta\beta\alpha\alpha\alpha$   | \                                     | \                    | \                | \                |
| sextet     | $\alpha\alpha\alpha\beta\beta$   | \                                     | \                    | \                | \                |
| sextet     | $\alpha\alpha\beta\alpha\beta$   | 0.0000                                | 0.0000               | 0.0000           | 0.0000           |
| sextet     | $\alpha\beta\alpha\alpha\beta$   | 0.0000                                | 0.0000               | 0.0000           | 0.0000           |
| sextet     | $\beta\alpha\alpha\alpha\beta$   | 0.0000                                | 0.0000               | 0.0000           | 0.0000           |
| octet      | $\alpha\alpha\alpha\beta\alpha$  | 0.0000                                | 0.0000               | 0.0000           | 0.0000           |
| octet      | $\alpha\alpha\beta\alpha\alpha$  | \                                     | \                    | \                | \                |
| octet      | $\alpha\beta\alpha\alpha\alpha$  | \                                     | \                    | \                | \                |
| octet      | $\beta\alpha\alpha\alpha\alpha$  | \                                     | \                    | \                | \                |
| 12-et      | $\alpha\alpha\alpha\alpha\beta$  | 0.0000                                | 0.0000               | 0.0000           | 0.0000           |
| 14-et      | $\alpha\alpha\alpha\alpha\alpha$ | \                                     | \                    | \                | \                |

|         |                                  |      |      |     |     |
|---------|----------------------------------|------|------|-----|-----|
|         | $\alpha\alpha\beta\alpha$        | 22.3 | 14.9 | 3.5 | 6.6 |
|         | $\alpha\beta\alpha\beta$         | 22.8 | 15.1 | 2.7 | 6.1 |
| doublet | $\alpha\beta\beta\alpha$         | \    | \    | \   | \   |
|         | $\beta\alpha\alpha\beta$         | 22.3 | 16.2 | 1.0 | 5.5 |
|         | $\beta\alpha\beta\alpha$         | \    | \    | \   | \   |
|         | $\beta\beta\alpha\alpha$         | \    | \    | \   | \   |
|         | $\alpha\alpha\alpha\beta\beta$   | \    | \    | \   | \   |
| sextet  | $\alpha\alpha\beta\alpha\beta$   | 22.3 | 15.0 | 1.6 | 4.9 |
|         | $\alpha\beta\alpha\alpha\beta$   | 22.9 | 7.6  | 4.1 | 0.0 |
|         | $\beta\alpha\alpha\alpha\beta$   | 21.6 | 14.0 | 2.8 | 5.0 |
|         | $\alpha\alpha\alpha\beta\alpha$  | 23.2 | 15.8 | 0.0 | 4.0 |
| octet   | $\alpha\alpha\beta\alpha\alpha$  | \    | \    | \   | \   |
|         | $\alpha\beta\alpha\alpha\alpha$  | \    | \    | \   | \   |
|         | $\beta\alpha\alpha\alpha\alpha$  | \    | \    | \   | \   |
|         | $\alpha\alpha\alpha\alpha\beta$  | 22.8 | 15.1 | 1.0 | 4.4 |
| 12-et   | $\alpha\alpha\alpha\alpha\beta$  | 22.8 | 15.1 | 1.0 | 4.4 |
| 14-et   | $\alpha\alpha\alpha\alpha\alpha$ | \    | \    | \   | \   |

| Spin state | Spin topology |       | Mulliken spin density |       |       |
|------------|---------------|-------|-----------------------|-------|-------|
|            | (Mn1~Mn4-O7)  |       | Rea                   | TS    | Pro   |
| doublet    | $\alpha$      | Mn1   | 2.93                  | 2.94  | 2.93  |
|            | $\alpha$      | Mn2   | 2.95                  | 2.95  | 2.95  |
|            | $\beta$       | Mn3   | -2.72                 | -2.74 | -2.79 |
|            | $\beta$       | Mn4   | -2.51                 | -2.56 | -1.95 |
|            |               | O6    | -0.06                 | 0.42  | -0.01 |
|            | $\alpha$      | O7    | 0.53                  | 0.16  | -0.03 |
|            | $\alpha$      | Mn1   | 2.91                  | 2.92  | 2.92  |
|            | $\beta$       | Mn2   | -2.94                 | -2.95 | -2.95 |
|            | $\alpha$      | Mn3   | 2.74                  | 2.73  | 2.73  |
|            | $\beta$       | Mn4   | -2.58                 | -2.55 | -1.91 |
|            |               | O6    | -0.05                 | 0.43  | 0.00  |
|            | $\alpha$      | O7    | 0.65                  | 0.19  | 0.00  |
|            | $\alpha$      | Mn1   | \                     | \     | \     |
|            | $\beta$       | Mn2   | \                     | \     | \     |
|            | $\beta$       | Mn3   | \                     | \     | \     |
|            | $\alpha$      | Mn4   | \                     | \     | \     |
|            |               | O6    | \                     | \     | \     |
|            | $\alpha$      | O7    | \                     | \     | \     |
|            | $\beta$       | Mn1   | -2.92                 | -2.92 | -2.92 |
|            | $\alpha$      | Mn2   | 2.92                  | 2.92  | 2.92  |
|            | $\alpha$      | Mn3   | 2.74                  | 2.74  | 2.74  |
| $\beta$    | Mn4           | -2.57 | -2.57                 | -1.92 |       |
|            | O6            | -0.05 | 0.43                  | 0.00  |       |
| $\alpha$   | O7            | 0.64  | 0.20                  | 0.00  |       |
| $\beta$    | Mn1           | \     | \                     | \     |       |

|          |          |          |       |       |       |      |
|----------|----------|----------|-------|-------|-------|------|
|          | $\alpha$ | Mn2      | \     | \     |       |      |
|          | $\beta$  | Mn3      | \     | \     | \     |      |
|          | $\alpha$ | Mn4      | \     | \     | \     |      |
|          |          | O6       | \     | \     | \     |      |
|          | $\alpha$ | O7       | \     | \     | \     |      |
|          | $\beta$  | Mn1      | \     | \     | \     |      |
|          | $\beta$  | Mn2      | \     | \     | \     |      |
|          | $\alpha$ | Mn3      | \     | \     | \     |      |
|          | $\alpha$ | Mn4      | \     | \     | \     |      |
|          |          | O6       | \     | \     | \     |      |
|          | $\alpha$ | O7       | \     | \     | \     |      |
|          | $\alpha$ | Mn1      | \     | \     | \     |      |
|          | $\alpha$ | Mn2      | \     | \     | \     |      |
|          | $\alpha$ | Mn3      | \     | \     | \     |      |
|          | $\beta$  | Mn4      | \     | \     | \     |      |
|          |          | O6       | \     | \     | \     |      |
|          | $\beta$  | O7       | \     | \     | \     |      |
|          | $\alpha$ | Mn1      | 2.93  | 2.92  | 2.93  |      |
|          | $\alpha$ | Mn2      | 2.95  | 2.95  | 2.95  |      |
|          | $\beta$  | Mn3      | -2.71 | -2.71 | -2.70 |      |
|          | $\alpha$ | Mn4      | 2.59  | 2.55  | 1.91  |      |
|          |          | O6       | 0.05  | -0.44 | 0.00  |      |
|          | $\beta$  | O7       | -0.66 | -0.19 | 0.01  |      |
| sextet   | $\alpha$ | Mn1      | 2.91  | 2.91  | 2.82  |      |
|          | $\beta$  | Mn2      | -2.94 | -2.95 | -3.82 |      |
|          | $\alpha$ | Mn3      | 2.76  | 2.77  | 2.79  |      |
|          | $\alpha$ | Mn4      | 2.49  | 2.48  | 2.82  |      |
|          |          | O6       | 0.06  | -0.37 | 0.00  |      |
|          | $\beta$  | O7       | -0.50 | -0.14 | 0.02  |      |
|          | $\beta$  | Mn1      | -2.91 | -2.94 | -2.91 |      |
|          | $\alpha$ | Mn2      | 2.92  | 2.93  | 2.93  |      |
|          | $\alpha$ | Mn3      | 2.77  | 2.80  | 2.85  |      |
|          | $\alpha$ | Mn4      | 2.51  | 2.56  | 1.95  |      |
|          |          | O6       | 0.07  | -0.42 | 0.01  |      |
|          | $\beta$  | O7       | -0.53 | -0.17 | 0.03  |      |
|          | octet    | $\alpha$ | Mn1   | 2.92  | 2.93  | 2.92 |
|          |          | $\alpha$ | Mn2   | 2.92  | 2.93  | 2.92 |
| $\alpha$ |          | Mn3      | 2.78  | 2.77  | 2.77  |      |
| $\beta$  |          | Mn4      | -2.59 | -2.55 | -1.91 |      |
|          |          | O6       | -0.05 | 0.43  | 0.00  |      |
| $\alpha$ |          | O7       | 0.66  | 0.19  | -0.01 |      |
| $\alpha$ |          | Mn1      | \     | \     | \     |      |
| $\alpha$ |          | Mn2      | \     | \     | \     |      |
| $\beta$  |          | Mn3      | \     | \     | \     |      |

|       |          |     |       |       |      |
|-------|----------|-----|-------|-------|------|
|       | $\alpha$ | Mn4 | \     | \     | \    |
|       |          | O6  | \     | \     | \    |
|       | $\alpha$ | O7  | \     | \     | \    |
|       | $\alpha$ | Mn1 | \     | \     | \    |
|       | $\beta$  | Mn2 | \     | \     | \    |
|       | $\alpha$ | Mn3 | \     | \     | \    |
|       | $\alpha$ | Mn4 | \     | \     | \    |
|       |          | O6  | \     | \     | \    |
|       | $\alpha$ | O7  | \     | \     | \    |
|       | $\beta$  | Mn1 | \     | \     | \    |
|       | $\alpha$ | Mn2 | \     | \     | \    |
|       | $\alpha$ | Mn3 | \     | \     | \    |
|       | $\alpha$ | Mn4 | \     | \     | \    |
|       |          | O6  | \     | \     | \    |
|       | $\alpha$ | O7  | \     | \     | \    |
|       | $\alpha$ | Mn1 | 2.92  | 2.92  | 2.92 |
|       | $\alpha$ | Mn2 | 2.93  | 2.92  | 2.92 |
| 12-et | $\alpha$ | Mn3 | 2.82  | 2.82  | 2.81 |
|       | $\alpha$ | Mn4 | 2.76  | 2.47  | 1.96 |
|       |          | O6  | -0.03 | -0.38 | 0.01 |
|       | $\beta$  | O7  | -0.70 | -0.12 | 0.06 |
|       | $\alpha$ | Mn1 | \     | \     | \    |
|       | $\alpha$ | Mn2 | \     | \     | \    |
|       | $\alpha$ | Mn3 | \     | \     | \    |
| 14-et | $\alpha$ | Mn4 | \     | \     | \    |
|       |          | O6  | \     | \     | \    |
|       | $\alpha$ | O7  | \     | \     | \    |

'\' denotes TSs for some spin states do not exist due to the failure of IRC verification on reactants concerning W1 returning back to Mn4.

**Rea:**

|    |             |             |             |   |             |            |             |
|----|-------------|-------------|-------------|---|-------------|------------|-------------|
| Ca | -2.53281700 | 0.15490400  | -1.33882900 | H | -2.90091400 | 2.29061700 | -3.11675100 |
| Mn | 0.32949200  | -1.54522100 | -0.75955000 | H | -1.37649200 | 2.27541600 | -2.85429100 |
| Mn | -1.43064400 | -1.85025400 | 1.24964400  | O | -0.01542700 | 5.27161300 | -0.97593800 |
| Mn | -0.29732400 | 0.66878100  | 0.98693200  | O | -0.61329000 | 4.57370400 | 1.42377100  |
| Mn | -0.45212500 | 3.84761500  | -0.25200300 | H | -0.93404600 | 3.79578300 | 1.92404000  |
| O  | -1.37278600 | -2.05673300 | -0.55629100 | O | -3.51992600 | 2.30050100 | -0.91563200 |
| O  | 0.33795100  | -1.26026600 | 1.06021200  | C | -3.41163400 | 3.52188400 | -0.65962900 |
| O  | -1.93965300 | -0.16157700 | 1.04074800  | O | -2.34621500 | 4.22872700 | -0.58721700 |
| O  | -0.08033900 | 0.22779800  | -0.84286500 | C | -4.71075500 | 4.30762600 | -0.42018600 |
| O  | -1.00625400 | 2.19667800  | 0.73477100  | H | -5.39001300 | 4.06649100 | -1.25089400 |
| O  | -4.43697400 | -0.61944100 | -2.89130700 | H | -5.16981100 | 3.85917100 | 0.47432200  |
| H  | -4.74066700 | -1.22983700 | -2.18744600 | C | -4.55013400 | 5.81763900 | -0.24583100 |
| H  | -3.76536100 | -1.11713400 | -3.40366700 | H | -4.12249200 | 6.27612900 | -1.14572700 |
| O  | -2.11618600 | 1.74098400  | -3.28906800 | H | -3.86985900 | 6.04206100 | 0.58301600  |

|            |             |             |             |   |             |             |             |
|------------|-------------|-------------|-------------|---|-------------|-------------|-------------|
| H          | -5.52245700 | 6.29051000  | -0.04502900 | C | 3.47561200  | 2.79775500  | 1.28002600  |
| O          | 0.30340400  | -1.92614300 | -2.68135200 | H | 3.99362800  | 3.06819900  | 0.34805800  |
| C          | -0.72464600 | -1.91694800 | -3.46597400 | H | 3.45552400  | 3.71713500  | 1.88301400  |
| O          | -1.82071900 | -1.37477100 | -3.22458800 | C | 2.02453100  | 2.51090100  | 0.86699100  |
| C          | -0.52044100 | -2.65730100 | -4.78817400 | O | 1.54435700  | 1.38540200  | 1.21313000  |
| H          | -0.55457200 | -3.73632600 | -4.56454600 | O | 1.48853700  | 3.43701400  | 0.20467900  |
| H          | -1.37409800 | -2.42912200 | -5.43857000 | O | 0.88533400  | -3.47937400 | -0.30882500 |
| C          | 0.80693000  | -2.32943800 | -5.48782400 | C | 0.30204600  | -4.14648900 | 0.61383200  |
| H          | 1.63029100  | -2.54290600 | -4.79449400 | O | -0.62554300 | -3.75351500 | 1.37918600  |
| H          | 0.84640900  | -1.24984900 | -5.69670900 | C | 0.79245500  | -5.58691500 | 0.78145800  |
| C          | 0.99466500  | -3.11250700 | -6.79188100 | H | 1.89035000  | -5.55386000 | 0.83389100  |
| H          | 0.99030900  | -4.19692600 | -6.60838600 | H | 0.55821800  | -6.10943400 | -0.15848100 |
| H          | 1.94810200  | -2.86017000 | -7.27613600 | H | -5.70285900 | -2.98291900 | 2.03983900  |
| H          | 0.18970400  | -2.89595300 | -7.50875700 | C | 0.20333300  | -6.33058500 | 1.97998100  |
| N          | 2.36878800  | -1.14420700 | -1.02281300 | H | 0.59353100  | -7.35658900 | 2.02685400  |
| C          | 2.90548100  | -0.03524500 | -1.63967400 | H | 0.45142100  | -5.82269100 | 2.91968700  |
| H          | 2.26407700  | 0.73066200  | -2.05532200 | H | -0.88952400 | -6.37549600 | 1.91437900  |
| C          | 4.27750000  | -0.10522500 | -1.58968000 | O | -4.21983300 | -1.48040800 | -0.32156400 |
| N          | 4.55837900  | -1.30171500 | -0.93436700 | C | -4.21857100 | -2.27944500 | 0.63811900  |
| H          | 5.46072800  | -1.51404500 | -0.50770100 | O | -3.22285100 | -2.53984900 | 1.41883500  |
| C          | 3.37981000  | -1.87938100 | -0.59343400 | C | -5.47875800 | -3.06915400 | 0.97010000  |
| H          | 3.27941600  | -2.80722600 | -0.04913900 | H | -5.30651000 | -4.13272700 | 0.75721100  |
| C          | 5.32713900  | 0.83051200  | -2.12737100 | H | -6.32540600 | -2.70986400 | 0.37774900  |
| H          | 5.48282400  | 0.65612600  | -3.20339600 | O | -1.24120600 | -1.51828000 | 3.21553700  |
| H          | 4.93256500  | 1.85244300  | -2.04751800 | C | -0.79736800 | -0.41382700 | 3.67987300  |
| C          | 6.71844200  | 0.74912900  | -1.44098400 | O | -0.35497100 | 0.57913800  | 3.02807300  |
| H          | 7.25353600  | -0.15038600 | -1.76585700 | C | -0.82399400 | -0.27299000 | 5.20028900  |
| H          | 7.31513000  | 1.61698900  | -1.75514700 | H | -0.21094300 | 0.59446100  | 5.47350500  |
| C          | 6.61419000  | 0.66859900  | 0.08073500  | H | -1.86381000 | -0.03474000 | 5.47807300  |
| O          | 6.72596800  | -0.41342800 | 0.67026900  | C | -0.37160100 | -1.53541100 | 5.94721500  |
| N          | 6.32746500  | 1.83555800  | 0.72065600  | H | 0.66292400  | -1.77459100 | 5.65736400  |
| H          | 6.15121900  | 2.64489000  | 0.13619700  | H | -0.98744600 | -2.38063800 | 5.61554500  |
| C          | 5.72676100  | 1.85184700  | 2.06094800  | C | -0.45713600 | -1.37896500 | 7.46938300  |
| H          | 6.19511600  | 1.03831300  | 2.62284300  | H | 0.17045800  | -0.54850900 | 7.82360500  |
| H          | 6.00107900  | 2.80111200  | 2.54073300  | H | -0.12496700 | -2.29112900 | 7.98389800  |
| C          | 4.19949600  | 1.66516800  | 2.01455200  | H | -1.48848300 | -1.17200000 | 7.78976800  |
| H          | 3.97395700  | 0.70741100  | 1.53114900  | O | -0.21735900 | 2.80216800  | -1.80001000 |
| H          | 3.81927800  | 1.58412800  | 3.04218000  | H | 0.06161300  | 1.91156300  | -1.48988100 |
| <b>TS:</b> |             |             |             |   |             |             |             |
| Ca         | -2.50756900 | 0.11970600  | -1.48367300 | O | -1.59047600 | -1.98600400 | -0.28839500 |
| Mn         | 0.16174100  | -1.69500000 | -0.52838600 | O | 0.18004900  | -1.09813800 | 1.21170900  |
| Mn         | -1.64046900 | -1.45368900 | 1.45115900  | O | -1.96433900 | 0.21844900  | 0.93432900  |
| Mn         | -0.24231600 | 0.85000200  | 0.78666100  | O | -0.06756300 | 0.06733900  | -0.93718700 |
| Mn         | -0.03443600 | 3.64819300  | -1.01222500 | O | -0.74937700 | 2.39595000  | 0.27527900  |

|   |             |             |             |   |             |             |             |
|---|-------------|-------------|-------------|---|-------------|-------------|-------------|
| O | -4.45519500 | -0.73415300 | -2.93137300 | H | 7.21426300  | -1.15310800 | -1.37707100 |
| H | -4.82494900 | -1.17917000 | -2.14049400 | H | 7.46781400  | 0.56760200  | -1.69654700 |
| H | -3.83163200 | -1.37493900 | -3.33310400 | C | 6.60757900  | 0.06825400  | 0.24454500  |
| O | -1.86723300 | 1.42103100  | -3.57774200 | O | 6.57545900  | -0.88421900 | 1.03354500  |
| H | -2.52511400 | 2.10849200  | -3.36102200 | N | 6.44146500  | 1.36113200  | 0.63712600  |
| H | -1.01082500 | 1.86086900  | -3.28475400 | H | 6.38002600  | 2.05798900  | -0.09635600 |
| O | 0.42239300  | 5.14917800  | -1.72208200 | C | 5.82680600  | 1.70485300  | 1.92579200  |
| O | 0.05620400  | 5.63558500  | -0.11492100 | H | 6.19879800  | 0.97770900  | 2.65378500  |
| H | -0.86255300 | 5.88059300  | -0.34712200 | H | 6.19368100  | 2.69840800  | 2.21701400  |
| O | -3.34203200 | 2.39068300  | -1.41160100 | C | 4.28911200  | 1.66739900  | 1.86726100  |
| C | -3.06216000 | 3.57278800  | -1.09765900 | H | 3.96833100  | 0.65826100  | 1.58441500  |
| O | -1.94892400 | 4.17412100  | -1.29875500 | H | 3.89181400  | 1.84294000  | 2.87693100  |
| C | -4.17765800 | 4.40433700  | -0.45209000 | C | 3.69660100  | 2.68698000  | 0.89036000  |
| H | -5.03300700 | 4.38781800  | -1.14365800 | H | 4.24857100  | 2.68910000  | -0.06232000 |
| H | -4.50215700 | 3.83647300  | 0.43193500  | H | 3.77315200  | 3.71236800  | 1.27754900  |
| C | -3.80620300 | 5.83682100  | -0.06985700 | C | 2.23104600  | 2.46084700  | 0.49437500  |
| H | -3.49106000 | 6.41326500  | -0.94859000 | O | 1.68185700  | 1.39196700  | 0.89902500  |
| H | -2.97908900 | 5.84665300  | 0.65122200  | O | 1.75685200  | 3.37405900  | -0.23812400 |
| H | -4.66119300 | 6.35267400  | 0.38947900  | O | 0.50172900  | -3.57426900 | 0.27615800  |
| O | 0.12838700  | -2.41178300 | -2.35418200 | C | -0.16411500 | -3.99975100 | 1.28110700  |
| C | -0.87340500 | -2.43337000 | -3.16969600 | O | -1.05078900 | -3.37909900 | 1.93753500  |
| O | -1.90934400 | -1.74553000 | -3.07130900 | C | 0.15293200  | -5.43493600 | 1.71072700  |
| C | -0.72534200 | -3.41300500 | -4.33466600 | H | 1.24739800  | -5.53309800 | 1.74364000  |
| H | -0.90594500 | -4.42348000 | -3.93214000 | H | -0.17689000 | -6.08728700 | 0.88754100  |
| H | -1.52280200 | -3.20109900 | -5.05789800 | H | -6.01407000 | -2.01417300 | 2.31422100  |
| C | 0.65364600  | -3.37844100 | -5.00947500 | C | -0.48364300 | -5.86550300 | 3.03221200  |
| H | 1.42115600  | -3.56282300 | -4.24723000 | H | -0.22363900 | -6.90744300 | 3.26466900  |
| H | 0.83817400  | -2.36620100 | -5.39950500 | H | -0.14198600 | -5.23150400 | 3.85943900  |
| C | 0.77893300  | -4.39809100 | -6.14687200 | H | -1.57491700 | -5.77917400 | 2.98698000  |
| H | 0.62995700  | -5.42385400 | -5.77906700 | O | -4.36611200 | -1.11890900 | -0.24272100 |
| H | 1.77115300  | -4.35326200 | -6.61668700 | C | -4.45421400 | -1.71810300 | 0.84986700  |
| H | 0.03054100  | -4.21714700 | -6.93173600 | O | -3.49910600 | -1.91552500 | 1.69553400  |
| N | 2.23892900  | -1.54807300 | -0.77202000 | C | -5.78928600 | -2.31165000 | 1.28325000  |
| C | 2.90788100  | -0.62744300 | -1.54853900 | H | -5.72013900 | -3.40768600 | 1.26728700  |
| H | 2.36424400  | 0.09661000  | -2.14104800 | H | -6.59091200 | -1.98642800 | 0.61354900  |
| C | 4.26292000  | -0.79786500 | -1.39196300 | O | -1.43247100 | -0.80388400 | 3.33360800  |
| N | 4.39690900  | -1.86278900 | -0.50432100 | C | -0.86050900 | 0.30453200  | 3.61208100  |
| H | 5.25290200  | -2.06294200 | 0.01406500  | O | -0.30590100 | 1.11378800  | 2.81055500  |
| C | 3.15356500  | -2.26513700 | -0.14253100 | C | -0.86563300 | 0.69995400  | 5.08727100  |
| H | 2.93904500  | -3.05603800 | 0.56153300  | H | -0.18218100 | 1.54787800  | 5.21651600  |
| C | 5.42138500  | -0.07280900 | -2.02345500 | H | -1.88103400 | 1.06219900  | 5.31644800  |
| H | 5.60119900  | -0.44981000 | -3.04232700 | C | -0.50963100 | -0.45454500 | 6.03475800  |
| H | 5.12980300  | 0.97930600  | -2.14507100 | H | 0.49990000  | -0.82079100 | 5.79329500  |
| C | 6.76944900  | -0.15864200 | -1.25737600 | H | -1.19451700 | -1.29017500 | 5.84392400  |

|             |             |             |             |   |             |             |             |
|-------------|-------------|-------------|-------------|---|-------------|-------------|-------------|
| C           | -0.56900600 | -0.04348500 | 7.50996000  | H | -1.57752300 | 0.29617900  | 7.78696100  |
| H           | 0.12654700  | 0.78042700  | 7.72544000  | O | 0.27368900  | 2.39402200  | -2.32604200 |
| H           | -0.30696500 | -0.88235000 | 8.16936800  | H | 0.35553900  | 1.52529900  | -1.86476700 |
| <b>Pro:</b> |             |             |             |   |             |             |             |
| Ca          | -2.54529300 | 0.01410500  | -1.36644200 | H | 2.07347600  | -3.02196100 | -7.18320100 |
| Mn          | 0.37171200  | -1.56025600 | -0.71875300 | H | 0.31915900  | -3.14706200 | -7.41607800 |
| Mn          | -1.37021900 | -1.81427600 | 1.31341200  | N | 2.42147500  | -1.16731700 | -0.94992500 |
| Mn          | -0.28010400 | 0.71238100  | 0.93063500  | C | 2.99773100  | -0.16750500 | -1.69991100 |
| Mn          | -0.60038800 | 3.62435800  | -0.50403600 | H | 2.38970500  | 0.49021200  | -2.30627400 |
| O           | -1.31949900 | -2.09708100 | -0.48509800 | C | 4.36019400  | -0.18118800 | -1.51337400 |
| O           | 0.38540100  | -1.20015000 | 1.08671800  | N | 4.59473700  | -1.23460300 | -0.63404600 |
| O           | -1.90965600 | -0.14393700 | 1.03346200  | H | 5.46372800  | -1.35935000 | -0.11271300 |
| O           | -0.06988700 | 0.19589400  | -0.87824700 | C | 3.39864000  | -1.78226800 | -0.30681700 |
| O           | -1.01847200 | 2.24939100  | 0.70150000  | H | 3.26305200  | -2.60043700 | 0.38514700  |
| O           | -4.42538000 | -0.93937100 | -2.86922400 | C | 5.44063100  | 0.68640200  | -2.10384400 |
| H           | -4.68869200 | -1.52626700 | -2.13053100 | H | 5.65346100  | 0.38192000  | -3.14034600 |
| H           | -3.72842700 | -1.42151200 | -3.36121000 | H | 5.04853100  | 1.71063700  | -2.17202900 |
| O           | -2.27603700 | 1.52313700  | -3.35421200 | C | 6.79266700  | 0.69507900  | -1.34116200 |
| H           | -3.04487600 | 2.08189700  | -3.14226500 | H | 7.33058300  | -0.24528800 | -1.50628400 |
| H           | -1.49769700 | 2.07098300  | -2.98482500 | H | 7.41597500  | 1.50482700  | -1.74592500 |
| O           | -0.33836800 | 5.39004100  | -1.00760500 | C | 6.62039500  | 0.83623700  | 0.17072200  |
| O           | -0.75788800 | 5.58844800  | 0.38662700  | O | 6.70838100  | -0.14746500 | 0.91656900  |
| H           | -1.73666800 | 5.59990000  | 0.26565400  | N | 6.30792800  | 2.08045800  | 0.62370100  |
| O           | -3.71722900 | 2.07645500  | -0.96023700 | H | 6.15156800  | 2.79799000  | -0.07496300 |
| C           | -3.63689400 | 3.28537900  | -0.63258600 | C | 5.67980600  | 2.28807300  | 1.93552600  |
| O           | -2.58883900 | 4.01623400  | -0.65110700 | H | 6.17031000  | 1.60064300  | 2.63129100  |
| C           | -4.93929000 | 3.97179100  | -0.19419100 | H | 5.90628800  | 3.31483100  | 2.25305200  |
| H           | -5.64819000 | 3.87267400  | -1.02983800 | C | 4.16250100  | 2.03139700  | 1.90666100  |
| H           | -5.35494700 | 3.35650800  | 0.61672800  | H | 3.98135200  | 0.99163000  | 1.61109300  |
| C           | -4.81293900 | 5.43194700  | 0.24053100  | H | 3.76869900  | 2.13194500  | 2.92790300  |
| H           | -4.40479600 | 6.05184300  | -0.56722500 | C | 3.40922100  | 2.97328900  | 0.96399500  |
| H           | -4.14316600 | 5.52839700  | 1.10502700  | H | 3.90524800  | 3.02255400  | -0.01790000 |
| H           | -5.79202500 | 5.84197600  | 0.52640100  | H | 3.40157800  | 4.00389200  | 1.34544800  |
| O           | 0.37572000  | -2.01053300 | -2.62310900 | C | 1.95356900  | 2.59497400  | 0.65789700  |
| C           | -0.64923700 | -2.07139900 | -3.41060500 | O | 1.55526700  | 1.45742200  | 1.07222600  |
| O           | -1.76714400 | -1.56797000 | -3.19015300 | O | 1.31939300  | 3.45250700  | -0.00752300 |
| C           | -0.40846000 | -2.84750400 | -4.70599800 | O | 0.95492500  | -3.47861500 | -0.18624000 |
| H           | -0.39287000 | -3.91850100 | -4.44500200 | C | 0.37885100  | -4.11593300 | 0.75937200  |
| H           | -1.27006900 | -2.68135400 | -5.36458500 | O | -0.54111300 | -3.69743300 | 1.52205300  |
| C           | 0.90411300  | -2.48305600 | -5.41543500 | C | 0.85624400  | -5.55664500 | 0.96151500  |
| H           | 1.73464700  | -2.63425200 | -4.71426000 | H | 1.95146900  | -5.55759400 | 0.87240400  |
| H           | 0.89385200  | -1.41073100 | -5.66214700 | H | 0.48839400  | -6.12903900 | 0.09559000  |
| C           | 1.13143300  | -3.30121000 | -6.69137300 | H | -5.61266200 | -2.99700000 | 2.20632000  |
| H           | 1.17671500  | -4.37763700 | -6.47025000 | C | 0.40011700  | -6.20577800 | 2.26854400  |

|   |             |             |             |   |             |             |             |
|---|-------------|-------------|-------------|---|-------------|-------------|-------------|
| H | 0.76061900  | -7.24174000 | 2.33215200  | C | -0.72583100 | -0.08498600 | 5.19032600  |
| H | 0.78164800  | -5.65468700 | 3.13710500  | H | -0.11975200 | 0.79957800  | 5.42092300  |
| H | -0.69285900 | -6.20973400 | 2.34134300  | H | -1.76382800 | 0.14934800  | 5.47785000  |
| O | -4.17756100 | -1.62054300 | -0.25365700 | C | -0.24333400 | -1.31369600 | 5.97379100  |
| C | -4.14906500 | -2.35607100 | 0.75431900  | H | 0.78927500  | -1.54961200 | 5.67442100  |
| O | -3.14205100 | -2.53689900 | 1.54259300  | H | -0.85312600 | -2.17823000 | 5.68324000  |
| C | -5.38455800 | -3.15773300 | 1.14595000  | C | -0.30453800 | -1.10439500 | 7.49079100  |
| H | -5.17929900 | -4.22862100 | 1.01497600  | H | 0.31800400  | -0.25394300 | 7.80428500  |
| H | -6.24112400 | -2.87026600 | 0.52915800  | H | 0.04850600  | -1.99335800 | 8.03144200  |
| O | -1.17069800 | -1.40445100 | 3.26105600  | H | -1.33286800 | -0.89917900 | 7.82191300  |
| C | -0.72317600 | -0.28122500 | 3.67546500  | O | -0.33013000 | 2.71587500  | -2.11499800 |
| O | -0.29519900 | 0.68652300  | 2.98002500  | H | 0.23972800  | 1.95243700  | -1.89575900 |

## O2 (oxo)-O4 (oxo/oxy)

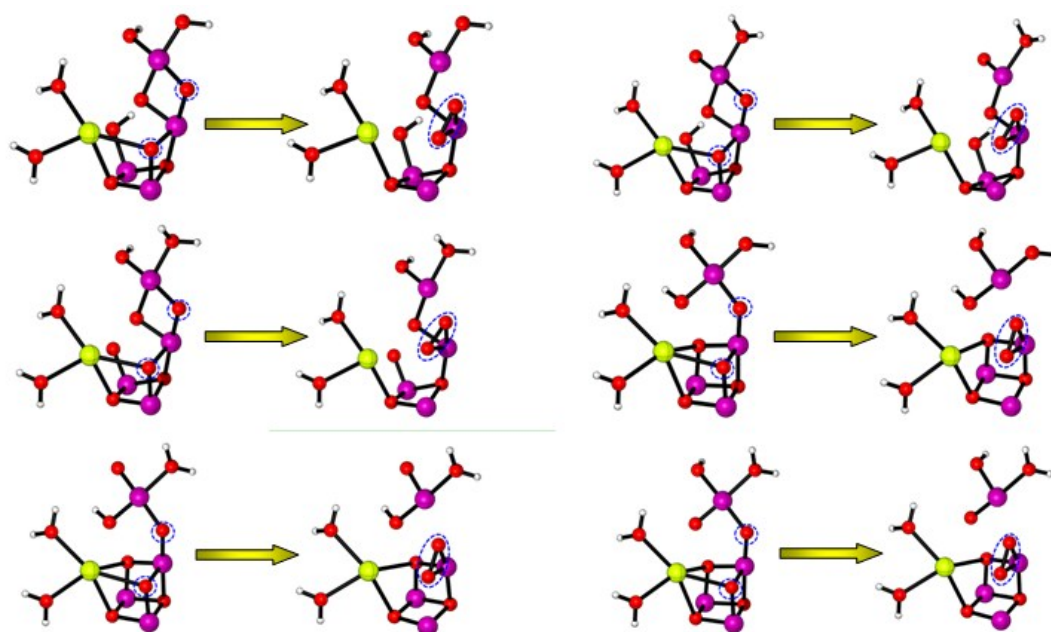

**Fig. S8** Pictorial exhibitions for O2 (oxo)-O4 (oxo/oxy) coupling in the open and closed-cubane structures with previous deprotonation sites of W1, W2 and Wx.

**Table S14** Reaction parameters for the open-cubane O2 (oxo)-O4 (oxo/oxy) coupling with deprotonated W1:

| Spin state | Spin topology<br>(Mn1~Mn4/O4) | Gibbs Free energy (a.u.) |            |            |
|------------|-------------------------------|--------------------------|------------|------------|
|            |                               | Rea                      | TS         | Pro-O-O    |
| doublet    | $\alpha\alpha\beta\beta$      | -3366.2250               | -3366.1806 | -3366.2157 |
|            | $\alpha\beta\alpha\beta$      | -3366.2168               | -3366.1543 | -3366.1707 |
|            | $\alpha\beta\beta\alpha$      | -3366.2232               | -3366.1517 | -3366.1755 |
|            | $\beta\alpha\alpha\beta$      | -3366.2177               | -3366.1813 | -3366.2147 |
|            | $\beta\alpha\beta\alpha$      | -3366.2222               | -3366.1817 | -3366.2164 |



|        |                            |            |            |            |
|--------|----------------------------|------------|------------|------------|
|        | $\beta\beta\alpha\alpha$   | -3366.2158 | -3366.1542 | -3366.1737 |
| sextet | $\alpha\alpha\beta\beta$   | -3366.2239 | -3366.1538 | -3366.1751 |
|        | $\alpha\alpha\beta\alpha$  | -3366.2177 | -3366.1559 | -3366.2235 |
|        | $\alpha\beta\alpha\beta$   | -3366.2244 | -3366.1781 | -3366.2172 |
|        | $\beta\alpha\alpha\beta$   | -3366.2246 | -3366.1530 | -3366.1766 |
|        | $\alpha\alpha\beta\alpha$  | -3366.2178 | -3366.1794 | -3366.2141 |
| octet  | $\alpha\alpha\beta\alpha$  | -3366.2234 | -3366.1826 | -3366.2168 |
|        | $\alpha\beta\alpha\alpha$  | -3366.2154 | -3366.1544 | -3366.1724 |
|        | $\beta\alpha\alpha\alpha$  | -3366.2159 | -3366.1836 | -3366.2156 |
| 12-et  | $\alpha\alpha\alpha\beta$  | -3366.2267 | -3366.1529 | -3366.1755 |
| 14-et  | $\alpha\alpha\alpha\alpha$ | -3366.2159 | -3366.1829 | -3366.2148 |

| Spin state | Spin topology<br>(Mn1~Mn4-O4/O10) | Relative Gibbs Free energy (kcal/mol) |                            |                        |                        |
|------------|-----------------------------------|---------------------------------------|----------------------------|------------------------|------------------------|
|            |                                   | $\Delta G^\ddagger(\text{Rea-TS})$    | $\Delta G(\text{Rea-Pro})$ | $\Delta G(\text{Rea})$ | $\Delta G(\text{Pro})$ |
| doublet    | $\alpha\alpha\beta\beta$          | 27.9                                  | 5.8                        | 1.1                    | 4.9                    |
|            | $\alpha\beta\alpha\beta$          | 39.2                                  | 28.9                       | 6.2                    | 33.1                   |
|            | $\alpha\beta\beta\alpha$          | 44.9                                  | 29.9                       | 2.2                    | 30.1                   |
|            | $\beta\alpha\beta\alpha$          | 22.8                                  | 1.9                        | 5.6                    | 5.5                    |
|            | $\beta\alpha\beta\alpha$          | 25.4                                  | 3.6                        | 2.8                    | 4.5                    |
|            | $\beta\beta\alpha\alpha$          | 38.7                                  | 26.4                       | 6.8                    | 31.2                   |
| sextet     | $\alpha\alpha\beta\beta$          | 44.0                                  | 30.6                       | 1.8                    | 30.4                   |
|            | $\alpha\alpha\beta\alpha$         | 38.8                                  | -3.6                       | 5.6                    | 0.0                    |
|            | $\alpha\beta\alpha\beta$          | 29.1                                  | 4.5                        | 1.4                    | 4.0                    |
|            | $\beta\alpha\alpha\beta$          | 44.9                                  | 30.1                       | 1.3                    | 29.4                   |
| octet      | $\alpha\alpha\beta\alpha$         | 24.1                                  | 2.3                        | 5.6                    | 5.9                    |
|            | $\alpha\alpha\beta\alpha$         | 25.6                                  | 4.1                        | 2.1                    | 4.2                    |
|            | $\alpha\beta\alpha\alpha$         | 38.3                                  | 27.0                       | 7.1                    | 32.1                   |
|            | $\beta\alpha\alpha\alpha$         | 20.3                                  | 0.2                        | 6.8                    | 5.0                    |
| 12-et      | $\alpha\alpha\alpha\beta$         | 46.3                                  | 32.1                       | 0.0                    | 30.1                   |
| 14-et      | $\alpha\alpha\alpha\alpha$        | 20.7                                  | 0.7                        | 6.8                    | 5.5                    |

| Spin state | topology | Spin<br>(Mn1~Mn4-O4) | Mulliken spin density |       |         |
|------------|----------|----------------------|-----------------------|-------|---------|
|            |          |                      | Rea                   | TS    | Pro-O-O |
| doublet    | $\alpha$ | Mn1                  | 2.92                  | 2.97  | 2.97    |
|            | $\alpha$ | Mn2                  | 2.94                  | 3.56  | 3.85    |
|            | $\beta$  | Mn3                  | -2.73                 | -2.94 | -3.07   |
|            | $\beta$  | Mn4                  | -2.90                 | -2.93 | -2.94   |
|            | $\alpha$ | O2                   | -0.02                 | -0.10 | 0.11    |
|            | $\alpha$ | O4                   | 0.77                  | 0.56  | 0.15    |
|            | $\alpha$ | Mn1                  | 2.94                  | 2.97  | 2.97    |
|            | $\beta$  | Mn2                  | -2.91                 | -2.40 | -1.93   |
|            | $\alpha$ | Mn3                  | 2.84                  | 3.01  | 3.04    |
|            | $\beta$  | Mn4                  | -2.86                 | -2.90 | -2.90   |

|        |          |     |       |       |       |
|--------|----------|-----|-------|-------|-------|
|        | $\alpha$ | O2  | 0.03  | 0.02  | -0.08 |
|        |          | O4  | 0.87  | 0.33  | -0.06 |
|        | $\alpha$ | Mn1 | 2.93  | 2.94  | 2.95  |
|        | $\beta$  | Mn2 | -2.93 | -2.39 | -1.98 |
|        | $\beta$  | Mn3 | -2.70 | -2.91 | -2.97 |
|        | $\alpha$ | Mn4 | 2.84  | 2.91  | 2.92  |
|        | $\alpha$ | O2  | -0.06 | 0.00  | 0.06  |
|        |          | O4  | 0.73  | 0.40  | 0.06  |
|        | $\beta$  | Mn1 | -2.93 | -2.93 | -2.91 |
|        | $\alpha$ | Mn2 | 2.93  | 3.49  | 3.85  |
|        | $\alpha$ | Mn3 | 2.84  | 2.86  | 3.02  |
|        | $\beta$  | Mn4 | -2.86 | -2.91 | -2.90 |
|        | $\alpha$ | O2  | 0.10  | -0.04 | -0.07 |
|        |          | O4  | 0.85  | 0.49  | -0.06 |
|        | $\beta$  | Mn1 | -2.94 | -2.95 | -2.93 |
|        | $\alpha$ | Mn2 | 2.91  | 3.52  | 3.84  |
|        | $\beta$  | Mn3 | -2.65 | -2.92 | -3.02 |
|        | $\alpha$ | Mn4 | 2.84  | 2.87  | 3.90  |
|        | $\alpha$ | O2  | -0.02 | -0.08 | 0.07  |
|        |          | O4  | 0.67  | 0.49  | 0.06  |
|        | $\beta$  | Mn1 | -2.96 | -2.95 | -2.94 |
|        | $\beta$  | Mn2 | -2.95 | -2.46 | -1.98 |
|        | $\alpha$ | Mn3 | 2.83  | 3.02  | 3.11  |
|        | $\alpha$ | Mn4 | 2.87  | 2.93  | 2.94  |
|        | $\alpha$ | O2  | 0.03  | 0.02  | -0.12 |
|        |          | O4  | 0.62  | 0.28  | -0.15 |
|        |          | O5  | 0.45  | 0.06  | 0.07  |
|        | $\alpha$ | Mn1 | 2.96  | 2.97  | 2.95  |
|        | $\alpha$ | Mn2 | 2.96  | 2.43  | 1.99  |
|        | $\alpha$ | Mn3 | 2.73  | 2.92  | 3.01  |
|        | $\beta$  | Mn4 | -2.84 | -2.91 | -2.91 |
|        | $\beta$  | O2  | 0.06  | -0.01 | -0.06 |
|        |          | O4  | -0.73 | -0.39 | -0.04 |
|        | $\alpha$ | Mn1 | 2.95  | 2.94  | 2.95  |
|        | $\alpha$ | Mn2 | 2.4   | 2.91  | 3.07  |
| sextet | $\beta$  | Mn3 | -2.83 | -3.46 | 2.95  |
|        | $\alpha$ | Mn4 | 2.86  | 2.88  | -3.82 |
|        |          | O2  | -0.03 | -0.07 | -0.08 |
|        | $\beta$  | O4  | -0.84 | -0.24 | -0.10 |
|        | $\alpha$ | Mn1 | 2.94  | 2.95  | 2.93  |
|        | $\beta$  | Mn2 | -2.90 | -3.52 | -3.84 |
|        | $\alpha$ | Mn3 | 2.73  | 2.95  | 3.09  |
|        | $\alpha$ | Mn4 | 2.90  | 2.92  | 2.94  |
|        | $\beta$  | O2  | 0.03  | 0.10  | -0.10 |

|       |          |     |       |       |       |
|-------|----------|-----|-------|-------|-------|
|       |          | O4  | -0.75 | -0.54 | -0.14 |
|       | $\beta$  | Mn1 | -2.93 | -2.94 | -2.95 |
|       | $\alpha$ | Mn2 | 2.93  | 2.40  | 1.99  |
|       | $\alpha$ | Mn3 | 2.76  | 2.92  | 3.02  |
|       | $\alpha$ | Mn4 | 2.90  | 2.92  | 2.94  |
|       | $\beta$  | O2  | 0.07  | -0.01 | -0.10 |
|       |          | O4  | -0.79 | -0.46 | -0.14 |
|       | $\alpha$ | Mn1 | 2.96  | 2.99  | 2.98  |
|       | $\alpha$ | Mn2 | 2.95  | 3.53  | 3.86  |
|       | $\alpha$ | Mn3 | 2.87  | 2.86  | 3.02  |
|       | $\beta$  | Mn4 | -2.86 | -2.90 | -2.90 |
|       | $\alpha$ | O2  | 0.09  | -0.04 | -0.06 |
|       |          | O4  | 0.88  | 0.50  | -0.04 |
|       | $\alpha$ | Mn1 | 2.95  | 2.97  | 2.97  |
|       | $\alpha$ | Mn2 | 2.94  | 3.55  | 3.85  |
|       | $\beta$  | Mn3 | -2.67 | -2.92 | -3.02 |
|       | $\alpha$ | Mn4 | 2.84  | 2.87  | 2.91  |
|       | $\alpha$ | O2  | -0.01 | -0.08 | 0.07  |
|       |          | O4  | 0.70  | 0.50  | 0.07  |
| octet | $\alpha$ | Mn1 | 2.94  | 2.97  | 2.97  |
|       | $\beta$  | Mn2 | -2.91 | -2.41 | -1.93 |
|       | $\alpha$ | Mn3 | 2.84  | 3.02  | 3.10  |
|       | $\alpha$ | Mn4 | 2.85  | 2.93  | 2.94  |
|       | $\alpha$ | O2  | 0.08  | 0.02  | -0.11 |
|       |          | O4  | 0.84  | 0.29  | -0.14 |
|       | $\beta$  | Mn1 | -2.93 | -2.93 | -2.91 |
|       | $\alpha$ | Mn2 | 2.92  | 3.49  | 3.85  |
|       | $\alpha$ | Mn3 | 2.85  | 2.89  | 3.07  |
|       | $\alpha$ | Mn4 | 2.87  | 2.90  | 2.93  |
|       | $\alpha$ | O2  | 0.09  | -0.03 | -0.10 |
|       |          | O4  | 0.62  | 0.45  | -0.14 |
|       |          | O5  | 0.44  | 0.08  | 0.08  |
|       | $\alpha$ | Mn1 | 2.97  | 2.97  | 2.94  |
|       | $\alpha$ | Mn2 | 2.96  | 2.44  | 1.99  |
| 12-et | $\alpha$ | Mn3 | 2.78  | 2.93  | 3.07  |
|       | $\alpha$ | Mn4 | 2.90  | 2.92  | 2.94  |
|       | $\beta$  | O2  | 0.07  | -0.01 | -0.09 |
|       |          | O4  | -0.78 | -0.44 | -0.13 |
|       | $\alpha$ | Mn1 | 2.97  | 2.99  | 2.99  |
|       | $\alpha$ | Mn2 | 2.96  | 3.53  | 3.86  |
| 14-et | $\alpha$ | Mn3 | 2.87  | 2.89  | 3.07  |
|       | $\alpha$ | Mn4 | 2.85  | 2.90  | 2.94  |
|       | $\alpha$ | O2  | 0.11  | -0.03 | -0.09 |
|       |          | O4  | 0.87  | 0.46  | -0.12 |

**Rea:**

|    |             |             |             |   |             |             |             |
|----|-------------|-------------|-------------|---|-------------|-------------|-------------|
| Ca | 2.46171800  | 0.20655500  | -1.41545100 | N | -1.92900400 | 2.45431000  | -0.04296800 |
| Mn | 0.08170600  | 1.94290100  | 0.19508000  | C | -2.62612200 | 2.55138500  | -1.22843900 |
| Mn | 1.36093400  | 0.12206800  | 1.87957800  | H | -2.10562100 | 2.49818300  | -2.17423200 |
| Mn | -0.17845400 | -1.58557700 | 0.32093200  | C | -3.96667500 | 2.69592900  | -0.95934000 |
| Mn | -0.13563300 | -2.83018400 | -2.23268900 | N | -4.05936000 | 2.69809100  | 0.42816300  |
| O  | 1.73724100  | 1.37498800  | 0.62776800  | H | -4.93465500 | 2.55430700  | 0.93969000  |
| O  | -0.35140400 | 0.28162700  | 1.06381900  | C | -2.81835100 | 2.53230100  | 0.93673300  |
| O  | 1.51022200  | -1.34564400 | 0.81701400  | H | -2.59257800 | 2.45220300  | 1.98929800  |
| O  | 0.23866900  | -1.19559500 | -1.37569300 | C | -5.14277300 | 2.84972300  | -1.88809500 |
| O  | -0.28143500 | -3.25591500 | -0.23288000 | H | -5.17159000 | 3.87064000  | -2.29791500 |
| O  | 4.71118100  | 1.14671600  | -2.02280200 | H | -4.98055400 | 2.18821900  | -2.75043000 |
| H  | 5.08785300  | 0.95614800  | -1.13941100 | C | -6.53604700 | 2.56325900  | -1.26880800 |
| H  | 4.41768500  | 2.07975400  | -1.99441300 | H | -6.82763300 | 3.37849900  | -0.59716500 |
| O  | 1.57256300  | 0.31924400  | -3.73147200 | H | -7.27566400 | 2.53070600  | -2.08045000 |
| H  | 0.82726100  | 0.92816600  | -3.57346600 | C | -6.57426100 | 1.28393900  | -0.43480900 |
| H  | 1.14563300  | -0.55368900 | -3.92171400 | O | -6.45531600 | 1.32011300  | 0.79730900  |
| O  | 0.15775300  | -2.06629500 | -3.84470500 | N | -6.67889900 | 0.11586000  | -1.11875300 |
| H  | -0.05281000 | -2.74751100 | -4.51061800 | H | -6.74548400 | 0.15086600  | -2.12849900 |
| O  | -0.67081100 | -4.42521400 | -2.89838300 | C | -6.48507200 | -1.18712200 | -0.47349300 |
| H  | 0.07002500  | -5.04444700 | -2.75563500 | H | -7.04109600 | -1.17326900 | 0.46992000  |
| O  | 3.07640300  | -1.98960900 | -2.12447900 | H | -6.94196100 | -1.94301500 | -1.12459300 |
| C  | 2.77373000  | -3.17794300 | -1.96668300 | C | -5.00850700 | -1.51740800 | -0.19490300 |
| O  | 1.56378900  | -3.66606600 | -1.98031400 | H | -4.60138400 | -0.78222600 | 0.50758900  |
| C  | 3.87224900  | -4.21016200 | -1.71878800 | H | -4.96695100 | -2.49260900 | 0.31059400  |
| H  | 4.67424600  | -3.98394500 | -2.43419400 | C | -4.15187700 | -1.55255600 | -1.46460800 |
| H  | 4.28362500  | -3.96965700 | -0.72658000 | H | -4.19516500 | -0.57735500 | -1.97482200 |
| C  | 3.45546300  | -5.67944100 | -1.78746300 | H | -4.51119800 | -2.30214700 | -2.18101000 |
| H  | 3.06192200  | -5.93666000 | -2.77919400 | C | -2.66965400 | -1.82824900 | -1.22663600 |
| H  | 2.67878500  | -5.90645200 | -1.04844800 | O | -2.17380600 | -1.46854600 | -0.11646300 |
| H  | 4.31823000  | -6.32823300 | -1.58920800 | O | -2.05833300 | -2.37653700 | -2.19517600 |
| O  | 0.73992800  | 3.59384500  | -0.51184600 | O | -0.13701200 | 2.92411500  | 1.94222000  |
| C  | 1.81293000  | 3.72394800  | -1.23951100 | C | 0.46512900  | 2.62973500  | 3.02626000  |
| O  | 2.54363200  | 2.79945000  | -1.63700800 | O | 1.11593600  | 1.56738500  | 3.24031300  |
| C  | 2.11320200  | 5.17865200  | -1.59703200 | C | 0.39369100  | 3.66403000  | 4.14184900  |
| H  | 1.25603200  | 5.55117600  | -2.17951300 | H | -0.62951800 | 4.06308300  | 4.15383500  |
| H  | 2.10389100  | 5.75929400  | -0.66287500 | H | 1.03250300  | 4.50115100  | 3.81954900  |
| C  | 3.41999300  | 5.39008900  | -2.36553500 | C | 0.82026200  | 3.15445800  | 5.51889800  |
| H  | 3.40739100  | 4.77471500  | -3.27524500 | H | 0.76183800  | 3.96393400  | 6.25742300  |
| H  | 4.25999500  | 5.02136600  | -1.75914800 | H | 0.17427100  | 2.33484300  | 5.85655800  |
| C  | 3.65188400  | 6.86092200  | -2.72925000 | H | 1.84764000  | 2.77550000  | 5.49716400  |
| H  | 2.84224600  | 7.24733400  | -3.36431200 | O | 4.20358800  | 0.01026700  | 0.41995600  |
| H  | 3.69806400  | 7.49342700  | -1.83153400 | C | 4.22237700  | -0.03255900 | 1.66672000  |
| H  | 4.59449100  | 6.98982000  | -3.27673000 | O | 3.18361600  | -0.03205000 | 2.44265500  |

|   |             |             |            |   |             |             |             |
|---|-------------|-------------|------------|---|-------------|-------------|-------------|
| C | 5.54253500  | -0.07906200 | 2.41801300 | C | -0.66405400 | -4.16828100 | 4.31789600  |
| H | 5.52844700  | -0.89634800 | 3.14833700 | H | 0.34805000  | -4.52058700 | 4.06913400  |
| H | 5.67466500  | 0.85558600  | 2.97872200 | H | -1.29991900 | -4.41863200 | 3.45940800  |
| H | 6.37547300  | -0.21022700 | 1.72165800 | C | -1.16445200 | -4.88212000 | 5.57772600  |
| O | 0.71469400  | -1.01991600 | 3.36882100 | H | -0.52634300 | -4.66130800 | 6.44478500  |
| C | -0.18482600 | -1.90929200 | 3.23251200 | H | -1.17133000 | -5.97074100 | 5.43729100  |
| O | -0.74327400 | -2.22893400 | 2.13873800 | H | -2.18802500 | -4.57149600 | 5.83114000  |
| C | -0.63742500 | -2.63976400 | 4.48643900 | O | 0.04484000  | 1.32990600  | -1.51109900 |
| H | 0.01680100  | -2.34052300 | 5.31358300 | H | -0.27420400 | 0.38782200  | -1.51183100 |
| H | -1.65212700 | -2.27995200 | 4.72063300 |   |             |             |             |

**TS:**

|    |             |             |             |   |             |             |             |
|----|-------------|-------------|-------------|---|-------------|-------------|-------------|
| Ca | 2.47454100  | 0.07362500  | -1.60640100 | C | 3.11783400  | 4.89981800  | -1.20659800 |
| Mn | 0.50350900  | 1.93321100  | 0.28674400  | H | 2.38105500  | 5.44341200  | -1.81944300 |
| Mn | 1.23874400  | -0.22768000 | 1.87403200  | H | 3.12247700  | 5.41277800  | -0.23419600 |
| Mn | -0.82580500 | -1.27168800 | 0.33793900  | C | 4.49911900  | 4.94447000  | -1.86523600 |
| Mn | -0.37164400 | -2.75908600 | -2.02660900 | H | 4.46122900  | 4.40285600  | -2.81972000 |
| O  | 1.93455100  | 0.89657400  | 0.61762800  | H | 5.21830800  | 4.40178000  | -1.23431800 |
| O  | -0.35587200 | 0.41760200  | 1.07932400  | C | 4.99094400  | 6.37825200  | -2.09249300 |
| O  | 0.65032300  | -2.17447400 | 0.84471700  | H | 4.30697500  | 6.93520100  | -2.74829300 |
| O  | -0.10584100 | -1.03373500 | -1.30803100 | H | 5.06501400  | 6.93169000  | -1.14583000 |
| O  | -0.50496700 | -3.08292400 | 0.00101000  | H | 5.98291300  | 6.38682800  | -2.56224300 |
| O  | 4.92889700  | 0.43631400  | -1.89344200 | N | -1.38002600 | 2.83900900  | 0.11086600  |
| H  | 5.14704500  | -0.06100800 | -1.07752200 | C | -1.98029800 | 3.23572600  | -1.06449500 |
| H  | 4.94159400  | 1.38243800  | -1.65305100 | H | -1.39758100 | 3.35640600  | -1.96662300 |
| O  | 1.47863100  | 0.10709700  | -3.86095700 | C | -3.33283400 | 3.37389200  | -0.86378400 |
| H  | 0.75436100  | 0.75513800  | -3.88512500 | N | -3.53361500 | 3.06894800  | 0.47735900  |
| H  | 1.02455300  | -0.77493200 | -3.94394900 | H | -4.45444200 | 2.88147800  | 0.88847500  |
| O  | -0.06764300 | -2.14668200 | -3.71429500 | C | -2.34119200 | 2.73647800  | 1.01936200  |
| H  | -0.25695900 | -2.89155500 | -4.31444900 | H | -2.20604900 | 2.38657600  | 2.03227600  |
| O  | -0.99630600 | -4.39251800 | -2.49789500 | C | -4.42609900 | 3.74602800  | -1.83228400 |
| H  | -0.27700600 | -5.02052500 | -2.29486000 | H | -4.30997000 | 4.79539100  | -2.14159100 |
| O  | 2.82863200  | -2.10313700 | -2.43938100 | H | -4.29150600 | 3.14990000  | -2.74636400 |
| C  | 2.51255000  | -3.24972100 | -2.08930700 | C | -5.87898200 | 3.57737000  | -1.32450900 |
| O  | 1.30685900  | -3.65753400 | -1.84891700 | H | -6.08685300 | 4.29965500  | -0.52666600 |
| C  | 3.60264000  | -4.29909600 | -1.88582600 | H | -6.55933300 | 3.80773700  | -2.15590300 |
| H  | 4.25715200  | -4.23961400 | -2.76635600 | C | -6.18242000 | 2.19632300  | -0.74240100 |
| H  | 4.20518700  | -3.92689200 | -1.04358400 | O | -6.11056000 | 1.98631900  | 0.47663300  |
| C  | 3.13276200  | -5.73103800 | -1.63090300 | N | -6.48993000 | 1.21441100  | -1.62739800 |
| H  | 2.55366300  | -6.11760300 | -2.47940100 | H | -6.54809200 | 1.44724600  | -2.61067300 |
| H  | 2.49823900  | -5.78671800 | -0.73920800 | C | -6.70803700 | -0.17819600 | -1.21462400 |
| H  | 3.99484100  | -6.39421100 | -1.48261000 | H | -7.40359100 | -0.17057300 | -0.36714600 |
| O  | 1.47658700  | 3.47994400  | -0.27326400 | H | -7.20324500 | -0.68614800 | -2.05155000 |
| C  | 2.56138800  | 3.49470400  | -0.98977100 | C | -5.41970900 | -0.90648100 | -0.80076800 |
| O  | 3.12221300  | 2.49852300  | -1.48348500 | H | -4.96232000 | -0.36116700 | 0.03041000  |

|   |             |             |             |   |             |             |             |
|---|-------------|-------------|-------------|---|-------------|-------------|-------------|
| H | -5.69958400 | -1.89725100 | -0.41466900 | C | 5.13411900  | -1.83273700 | 2.13279200  |
| C | -4.39633900 | -1.06340300 | -1.93375300 | H | 4.86617200  | -2.76067100 | 2.65224300  |
| H | -4.25187800 | -0.09422100 | -2.43889100 | H | 5.49493900  | -1.12931100 | 2.89412800  |
| H | -4.72377900 | -1.78036700 | -2.69562100 | H | 5.92561200  | -2.02859400 | 1.40393700  |
| C | -3.01232400 | -1.47903500 | -1.44781000 | O | 0.21129400  | -1.19714000 | 3.28998800  |
| O | -2.62383700 | -0.96315800 | -0.34420700 | C | -0.96400100 | -1.66664600 | 3.17509700  |
| O | -2.34940300 | -2.26833500 | -2.17223200 | O | -1.66218700 | -1.67259400 | 2.10864200  |
| O | 0.54872200  | 2.77816400  | 2.13682600  | C | -1.60066900 | -2.27569700 | 4.41289700  |
| C | 1.10095900  | 2.29051100  | 3.16988600  | H | -0.90523700 | -2.16215400 | 5.25255200  |
| O | 1.48384500  | 1.08534700  | 3.31254200  | H | -2.50868900 | -1.69686400 | 4.64138800  |
| C | 1.33391500  | 3.23962800  | 4.33801300  | C | -1.97916800 | -3.75424900 | 4.20505100  |
| H | 0.44399600  | 3.87817500  | 4.41569700  | H | -1.07408700 | -4.32399400 | 3.94875600  |
| H | 2.15117600  | 3.90777200  | 4.02434800  | H | -2.64968500 | -3.82836000 | 3.33928200  |
| C | 1.66589300  | 2.56246000  | 5.66820000  | C | -2.64177800 | -4.36313300 | 5.44479500  |
| H | 1.83299900  | 3.31884000  | 6.44533900  | H | -1.97580100 | -4.31897100 | 6.31789100  |
| H | 0.84844600  | 1.90890300  | 5.99603200  | H | -2.90048100 | -5.41643600 | 5.27561900  |
| H | 2.56690700  | 1.94553800  | 5.58325000  | H | -3.56681200 | -3.82919500 | 5.70498500  |
| O | 3.91596400  | -1.00993200 | 0.22540000  | O | 0.34483900  | 1.46606200  | -1.45582500 |
| C | 3.90462500  | -1.25651600 | 1.45012000  | H | -0.15631900 | 0.59975800  | -1.50087700 |
| O | 2.90539800  | -1.06908800 | 2.25219900  |   |             |             |             |

**Pro:**

|    |             |             |             |   |             |             |             |
|----|-------------|-------------|-------------|---|-------------|-------------|-------------|
| Ca | 2.65521500  | 0.14778300  | -1.48918700 | C | 3.66414300  | -4.35496500 | -1.60590300 |
| Mn | 0.42845700  | 1.84977200  | 0.26536000  | H | 4.39619500  | -4.27521700 | -2.42235200 |
| Mn | 1.34061900  | -0.11993800 | 1.96791600  | H | 4.18958800  | -4.00425000 | -0.70551100 |
| Mn | -0.64854600 | -1.48115400 | 0.39049600  | C | 3.17894000  | -5.79369900 | -1.43086900 |
| Mn | -0.25443200 | -2.80780900 | -2.13248100 | H | 2.68841000  | -6.16281700 | -2.34016600 |
| O  | 1.97158700  | 1.04565400  | 0.70765600  | H | 2.45924700  | -5.87057200 | -0.60795500 |
| O  | -0.27639400 | 0.25827400  | 1.04881400  | H | 4.02596900  | -6.45641300 | -1.21120200 |
| O  | 0.42178400  | -2.98529100 | 0.67567300  | O | 1.25817000  | 3.47031900  | -0.33838200 |
| O  | 0.17172600  | -1.23808900 | -1.18259900 | C | 2.36413000  | 3.57439400  | -1.01089500 |
| O  | -0.67717300 | -3.32962100 | -0.12874000 | O | 3.03619600  | 2.62861200  | -1.46581200 |
| O  | 5.03974000  | 0.76435600  | -1.91226500 | C | 2.79799300  | 5.02245800  | -1.22969700 |
| H  | 5.33930600  | 0.39048100  | -1.05767000 | H | 2.00973700  | 5.50772600  | -1.82658200 |
| H  | 4.92063900  | 1.72290900  | -1.76325300 | H | 2.77444100  | 5.52728100  | -0.25291400 |
| O  | 1.76149500  | 0.15501000  | -3.78253300 | C | 4.16208700  | 5.18713500  | -1.90442600 |
| H  | 1.04889300  | 0.81777100  | -3.75875300 | H | 4.15820000  | 4.65041100  | -2.86270700 |
| H  | 1.28141800  | -0.71121400 | -3.88798700 | H | 4.93206900  | 4.70303500  | -1.28620500 |
| O  | 0.15706600  | -2.03610600 | -3.72942900 | C | 4.52881500  | 6.65853200  | -2.12788500 |
| H  | -0.07001700 | -2.69975400 | -4.40706300 | H | 3.79198100  | 7.16008100  | -2.77101100 |
| O  | -0.89063500 | -4.34722900 | -2.83982200 | H | 4.56842700  | 7.21043300  | -1.17824800 |
| H  | -0.20615900 | -5.02438600 | -2.67953000 | H | 5.51040300  | 6.75350200  | -2.60983000 |
| O  | 2.93042400  | -2.12619500 | -2.07280500 | N | -1.50356600 | 2.61340800  | -0.04169900 |
| C  | 2.59269200  | -3.30383100 | -1.88817200 | C | -2.07900200 | 2.93284200  | -1.25185100 |
| O  | 1.37617000  | -3.75671700 | -1.91292700 | H | -1.48130000 | 2.96450300  | -2.15184700 |

|   |             |             |             |   |             |             |             |
|---|-------------|-------------|-------------|---|-------------|-------------|-------------|
| C | -3.42662300 | 3.14267600  | -1.07699800 | C | 0.70783500  | 3.39579700  | 4.32342700  |
| N | -3.64846800 | 2.95502600  | 0.28234800  | H | -0.22747500 | 3.96605200  | 4.25008000  |
| H | -4.57719100 | 2.83466700  | 0.69862800  | H | 1.51105300  | 4.11519000  | 4.09935000  |
| C | -2.47341400 | 2.62160100  | 0.86125800  | C | 0.89782000  | 2.79066900  | 5.71487200  |
| H | -2.35700800 | 2.36542400  | 1.90381100  | H | 0.90585400  | 3.58239500  | 6.47451600  |
| C | -4.49715800 | 3.50492900  | -2.07438700 | H | 0.08771300  | 2.09230200  | 5.95864400  |
| H | -4.35767500 | 4.54173300  | -2.41532000 | H | 1.84082100  | 2.23724900  | 5.77841000  |
| H | -4.35920900 | 2.87815800  | -2.96701700 | O | 4.22477000  | -0.59901500 | 0.32875900  |
| C | -5.96001500 | 3.37779900  | -1.57953300 | C | 4.16171400  | -0.84539300 | 1.55117500  |
| H | -6.17761100 | 4.15207200  | -0.83515600 | O | 3.07072000  | -0.90207200 | 2.24684200  |
| H | -6.62828600 | 3.55111200  | -2.43421300 | C | 5.42410900  | -1.13129800 | 2.34531900  |
| C | -6.26500300 | 2.03815700  | -0.91028900 | H | 5.31144400  | -2.07379400 | 2.89410100  |
| O | -6.24329500 | 1.91867600  | 0.32259400  | H | 5.56904700  | -0.33937800 | 3.09194800  |
| N | -6.50058900 | 0.98594000  | -1.73426200 | H | 6.29630100  | -1.18228700 | 1.68763300  |
| H | -6.48903000 | 1.14122300  | -2.73457500 | O | 0.50443300  | -1.40464600 | 3.21685700  |
| C | -6.60686900 | -0.39043200 | -1.23557300 | C | -0.68691500 | -1.85896200 | 3.19530100  |
| H | -7.29491300 | -0.38356600 | -0.38278400 | O | -1.45186600 | -1.85249900 | 2.18027900  |
| H | -7.06511200 | -0.98742000 | -2.03388600 | C | -1.21668600 | -2.43557200 | 4.49712600  |
| C | -5.25895100 | -0.98696200 | -0.79785400 | H | -0.40193300 | -3.02717800 | 4.93780400  |
| H | -4.85497800 | -0.38693000 | 0.02385700  | H | -1.36487500 | -1.58479200 | 5.18223200  |
| H | -5.44735500 | -1.99209000 | -0.39384000 | C | -2.50153300 | -3.26014100 | 4.37442700  |
| C | -4.22711800 | -1.06765700 | -1.92956000 | H | -2.33293000 | -4.08717400 | 3.67071400  |
| H | -4.10639900 | -0.07490800 | -2.39238600 | H | -3.28953100 | -2.63883900 | 3.92859500  |
| H | -4.53662400 | -1.75944400 | -2.72209500 | C | -2.96647800 | -3.81024000 | 5.72739100  |
| C | -2.83379300 | -1.47802800 | -1.46578700 | H | -2.20436200 | -4.46100200 | 6.17865000  |
| O | -2.44482000 | -1.03109800 | -0.33846000 | H | -3.88586000 | -4.40002200 | 5.61933900  |
| O | -2.16838100 | -2.20695100 | -2.25716300 | H | -3.17261300 | -2.99913200 | 6.44036800  |
| O | 0.25853900  | 2.79267900  | 2.06407000  | O | 0.39532000  | 1.29021700  | -1.46298300 |
| C | 0.71688000  | 2.39135500  | 3.17811500  | H | -0.02722500 | 0.38478100  | -1.47143300 |
| O | 1.18999200  | 1.23511000  | 3.40852900  |   |             |             |             |

**Table S15** Reaction parameters for the open-cubane O2 (oxo)-O4 (oxo/oxy) coupling with deprotonated W2:

| Spin state | Spin topology<br>(Mn1~Mn4-O4/O7) | Gibbs Free energy (a.u.) |            |            |
|------------|----------------------------------|--------------------------|------------|------------|
|            |                                  | Rea                      | TS         | Pro-O-O    |
| doublet    | $\alpha\alpha\beta\beta$         | -3366.2166               | -3366.1591 | -3366.1950 |
|            | $\alpha\beta\alpha\beta$         | -3366.2133               | -3366.1298 | -3366.1566 |
|            | $\alpha\beta\beta\alpha$         | -3366.2030               | -3366.1312 | -3366.1553 |
|            | $\beta\alpha\alpha\beta$         | -3366.2179               | -3366.1643 | -3366.2010 |
|            | $\beta\alpha\beta\alpha$         | -3366.2026               | -3366.1599 | -3366.1963 |
|            | $\beta\beta\alpha\alpha$         | -3366.1942               | -3366.1330 | -3366.1537 |
| sextet     | $\alpha\alpha\alpha\beta\beta$   | -3366.2040               | -3366.1324 | -3366.1469 |
|            | $\alpha\alpha\beta\alpha\beta$   | -3366.2159               | -3366.1361 | -3366.1666 |

|            | $\alpha\beta\alpha\beta$          | -3366.2181                            | -3366.1607                 | -3366.1968             |                        |       |
|------------|-----------------------------------|---------------------------------------|----------------------------|------------------------|------------------------|-------|
|            | $\beta\alpha\alpha\beta$          | -3366.2175                            | -3366.1374                 | -3366.1661             |                        |       |
| octet      | $\alpha\alpha\beta\alpha$         | -3366.2188                            | -3366.1604                 | -3366.1957             |                        |       |
|            | $\alpha\alpha\beta\alpha\alpha$   | -3366.2036                            | -3366.1607                 | -3366.1970             |                        |       |
|            | $\alpha\beta\alpha\alpha\alpha$   | -3366.1949                            | -3366.1335                 | -3366.1517             |                        |       |
|            | $\beta\alpha\alpha\alpha\alpha$   | -3366.1952                            | -3366.1612                 | -3366.1967             |                        |       |
|            | 12-et                             | $\alpha\alpha\alpha\alpha\beta$       | -3366.2164                 | -3366.1337             | -3366.1551             |       |
| 14-et      | $\alpha\alpha\alpha\alpha\alpha$  | -3366.1957                            | -3366.1607                 | -3366.1952             |                        |       |
| Spin state | Spin topology<br>(Mn1~Mn4-O4/O10) | Relative Gibbs Free energy (kcal/mol) |                            |                        |                        |       |
|            |                                   | $\Delta G^\ddagger(\text{Rea-TS})$    | $\Delta G(\text{Rea-Pro})$ | $\Delta G(\text{Rea})$ | $\Delta G(\text{Pro})$ |       |
| doublet    | $\alpha\alpha\beta\beta\alpha$    | 36.1                                  | 13.6                       | 1.4                    | 3.8                    |       |
|            | $\alpha\beta\alpha\beta\alpha$    | 52.4                                  | 35.6                       | 3.5                    | 27.9                   |       |
|            | $\alpha\beta\beta\alpha\alpha$    | 45.1                                  | 29.9                       | 9.9                    | 28.7                   |       |
|            | $\beta\alpha\alpha\beta\alpha$    | 33.6                                  | 10.6                       | 0.6                    | 0.0                    |       |
|            | $\beta\alpha\beta\alpha\alpha$    | 26.8                                  | 4.0                        | 10.2                   | 2.9                    |       |
|            | $\beta\beta\alpha\alpha\alpha$    | 38.4                                  | 25.4                       | 15.4                   | 29.7                   |       |
| sextet     | $\alpha\alpha\alpha\beta\beta$    | 44.9                                  | 35.8                       | 9.3                    | 33.9                   |       |
|            | $\alpha\alpha\beta\alpha\beta$    | 50.1                                  | 30.9                       | 1.8                    | 21.6                   |       |
|            | $\alpha\beta\alpha\alpha\beta$    | 36.0                                  | 13.4                       | 0.4                    | 2.6                    |       |
|            | $\beta\alpha\alpha\alpha\beta$    | 50.3                                  | 32.3                       | 0.8                    | 21.9                   |       |
| octet      | $\alpha\alpha\alpha\beta\alpha$   | 36.6                                  | 14.5                       | 0.0                    | 3.3                    |       |
|            | $\alpha\alpha\beta\alpha\alpha$   | 26.9                                  | 4.1                        | 9.5                    | 2.5                    |       |
|            | $\alpha\beta\alpha\alpha\alpha$   | 38.5                                  | 27.1                       | 15.0                   | 30.9                   |       |
|            | $\beta\alpha\alpha\alpha\alpha$   | 21.3                                  | -0.9                       | 14.8                   | 2.7                    |       |
| 12-et      | $\alpha\alpha\alpha\alpha\beta$   | 51.9                                  | 38.5                       | 1.5                    | 28.8                   |       |
| 14-et      | $\alpha\alpha\alpha\alpha\alpha$  | 22.0                                  | 0.3                        | 14.5                   | 3.6                    |       |
| Spin state | Spin topology<br>(Mn1~Mn4-O4/O7)  | Mulliken spin density                 |                            |                        |                        |       |
|            |                                   | Rea                                   | TS                         | Pro-O-O                |                        |       |
| doublet    | $\alpha$                          | Mn1                                   | 2.96                       | 2.97                   | 2.97                   |       |
|            | $\alpha$                          | Mn2                                   | 2.94                       | 3.57                   | 3.85                   |       |
|            | $\beta$                           | Mn3                                   | -2.88                      | -2.96                  | -3.09                  |       |
|            | $\beta$                           | Mn4                                   | -2.72                      | -2.69                  | -2.70                  |       |
|            | $\alpha$                          | O2                                    | -0.02                      | -0.14                  | 0.08                   |       |
|            |                                   | O4                                    | -0.12                      | 0.54                   | 0.12                   |       |
|            |                                   | O7                                    | 0.78                       | -0.31                  | -0.31                  |       |
|            | $\alpha$                          | Mn1                                   | 2.94                       | 2.94                   | 2.97                   |       |
|            |                                   | $\beta$                               | Mn2                        | -2.92                  | -2.48                  | -1.92 |
|            |                                   | $\alpha$                              | Mn3                        | 2.86                   | 2.93                   | 3.02  |
| $\beta$    |                                   | Mn4                                   | -2.69                      | -2.66                  | -2.61                  |       |
| O2         |                                   | 0.01                                  | 0.02                       | -0.06                  |                        |       |
| O4         |                                   | 0.04                                  | 0.40                       | -0.04                  |                        |       |



|        |          |     |       |       |       |
|--------|----------|-----|-------|-------|-------|
|        |          | O7  | 0.80  | -0.28 | -0.35 |
|        | $\alpha$ | Mn1 | 2.93  | 2.94  | 2.95  |
|        | $\beta$  | Mn2 | -2.93 | -2.35 | -1.98 |
|        | $\beta$  | Mn3 | -2.73 | -2.93 | -2.99 |
|        | $\alpha$ | Mn4 | 2.61  | 2.66  | 2.67  |
|        | $\alpha$ | O2  | -0.07 | -0.04 | 0.07  |
|        |          | O4  | 0.74  | 0.41  | 0.07  |
|        |          | O7  | 0.34  | 0.33  | 0.32  |
|        | $\beta$  | Mn1 | -2.94 | -2.93 | -2.91 |
|        | $\alpha$ | Mn2 | 2.94  | 3.49  | 3.85  |
|        | $\alpha$ | Mn3 | 2.90  | 2.89  | 3.05  |
|        | $\beta$  | Mn4 | -2.71 | -2.65 | -2.66 |
|        | $\alpha$ | O2  | 0.05  | -0.05 | -0.07 |
|        |          | O4  | -0.01 | 0.52  | -0.06 |
|        |          | O7  | 0.83  | -0.33 | -0.32 |
|        | $\beta$  | Mn1 | -2.94 | -2.95 | -2.93 |
|        | $\alpha$ | Mn2 | 2.90  | 3.52  | 3.83  |
|        | $\beta$  | Mn3 | -2.68 | -2.95 | -3.06 |
|        | $\alpha$ | Mn4 | 2.61  | 2.64  | 2.66  |
|        | $\alpha$ | O2  | -0.04 | -0.10 | 0.07  |
|        |          | O4  | 0.69  | 0.49  | 0.07  |
|        |          | O7  | 0.34  | 0.33  | 0.32  |
|        | $\beta$  | Mn1 | -2.95 | -2.95 | -2.95 |
|        | $\beta$  | Mn2 | -2.94 | -2.42 | -1.98 |
|        | $\alpha$ | Mn3 | 2.85  | 3.03  | 3.13  |
|        | $\alpha$ | Mn4 | 2.63  | 2.70  | 2.70  |
|        | $\alpha$ | O2  | 0.07  | 0.01  | -0.09 |
|        |          | O4  | 0.88  | 0.33  | -0.12 |
|        |          | O7  | 0.37  | 0.31  | 0.31  |
|        | $\alpha$ | Mn1 | 2.96  | 2.97  | 2.92  |
|        | $\alpha$ | Mn2 | 2.96  | 2.39  | 1.98  |
|        | $\alpha$ | Mn3 | 2.75  | 2.94  | 3.05  |
|        | $\beta$  | Mn4 | -2.61 | -2.66 | -2.67 |
|        | $\beta$  | O2  | 0.07  | 0.03  | -0.07 |
|        |          | O4  | -0.73 | -0.39 | -0.05 |
|        |          | O7  | -0.34 | -0.33 | -0.31 |
| sextet | $\alpha$ | Mn1 | 2.96  | 2.97  | 2.97  |
|        | $\alpha$ | Mn2 | 2.95  | 3.85  | 3.86  |
|        | $\beta$  | Mn3 | -2.86 | -2.90 | -3.07 |
|        | $\alpha$ | Mn4 | 2.68  | 1.46  | 0.98  |
|        |          | O2  | 0.00  | 0.11  | 0.08  |
|        | $\beta$  | O4  | -0.05 | 0.08  | 0.09  |
|        |          | O7  | -0.76 | -0.34 | 0.00  |
|        | $\alpha$ | Mn1 | 2.94  | 2.95  | 2.93  |

|       |          |     |       |       |       |
|-------|----------|-----|-------|-------|-------|
|       | $\beta$  | Mn2 | -2.91 | -3.53 | -3.83 |
|       | $\alpha$ | Mn3 | 2.88  | 2.97  | 3.10  |
|       | $\alpha$ | Mn4 | 2.73  | 2.70  | 2.70  |
|       | $\beta$  | O2  | 0.03  | 0.14  | -0.08 |
|       |          | O4  | 0.13  | -0.52 | -0.11 |
|       |          | O7  | -0.78 | 0.31  | 0.31  |
|       | $\beta$  | Mn1 | -2.93 | -2.90 | -2.91 |
|       | $\alpha$ | Mn2 | 2.94  | 3.85  | 3.85  |
|       | $\alpha$ | Mn3 | 2.91  | 2.95  | 3.07  |
|       | $\alpha$ | Mn4 | 2.72  | 2.22  | 1.06  |
|       | $\beta$  | O2  | 0.06  | -0.40 | -0.08 |
|       |          | O4  | 0.11  | -0.10 | -0.09 |
|       |          | O7  | -0.78 | -0.68 | -0.02 |
|       | $\alpha$ | Mn1 | 2.96  | 2.99  | 2.99  |
|       | $\alpha$ | Mn2 | 2.96  | 3.49  | 3.86  |
|       | $\alpha$ | Mn3 | 2.91  | 2.86  | 3.00  |
|       | $\beta$  | Mn4 | -2.69 | -2.75 | -2.69 |
|       | $\alpha$ | O2  | 0.05  | -0.03 | -0.06 |
|       |          | O4  | 0.02  | 0.53  | -0.04 |
|       |          | O7  | 0.80  | -0.17 | -0.25 |
|       | $\alpha$ | Mn1 | 2.96  | 2.97  | 2.97  |
|       | $\alpha$ | Mn2 | 2.94  | 3.56  | 3.85  |
|       | $\beta$  | Mn3 | -2.69 | -2.95 | -3.04 |
|       | $\alpha$ | Mn4 | 2.61  | 3.65  | 2.67  |
|       | $\alpha$ | O2  | -0.04 | -0.10 | 0.07  |
|       |          | O4  | 0.71  | 0.50  | 0.07  |
|       |          | O7  | 0.34  | 0.33  | 0.32  |
| octet | $\alpha$ | Mn1 | 2.94  | 2.96  | 2.96  |
|       | $\beta$  | Mn2 | -2.90 | -2.37 | -1.93 |
|       | $\alpha$ | Mn3 | 2.86  | 3.03  | 3.12  |
|       | $\alpha$ | Mn4 | 2.63  | 2.71  | 2.71  |
|       | $\alpha$ | O2  | 0.07  | 0.01  | -0.09 |
|       |          | O4  | 0.89  | 0.34  | -0.11 |
|       |          | O7  | 0.37  | 0.31  | 0.31  |
|       | $\beta$  | Mn1 | -2.93 | -2.93 | -2.91 |
|       | $\alpha$ | Mn2 | 2.93  | 3.48  | 3.85  |
|       | $\alpha$ | Mn3 | 2.86  | 2.91  | 3.09  |
|       | $\alpha$ | Mn4 | 2.63  | 2.69  | 2.70  |
|       | $\alpha$ | O2  | 0.12  | -0.02 | -0.07 |
|       |          | O4  | 0.88  | 0.50  | -0.10 |
|       |          | O7  | 0.37  | 0.31  | 0.31  |
| 12-et | $\alpha$ | Mn1 | 2.97  | 2.99  | 2.95  |
|       | $\alpha$ | Mn2 | 2.97  | 3.86  | 2.00  |
|       | $\alpha$ | Mn3 | 2.91  | 2.95  | 3.07  |

|       |          |     |       |       |       |
|-------|----------|-----|-------|-------|-------|
|       | $\alpha$ | Mn4 | 2.70  | 1.56  | 2.71  |
|       | $\beta$  | O2  | 0.06  | -0.23 | -0.07 |
|       |          | O4  | 0.11  | 0.05  | -0.10 |
|       |          | O7  | -0.72 | -0.38 | 0.31  |
| 14-et | $\alpha$ | Mn1 | 2.97  | 2.99  | 2.99  |
|       | $\alpha$ | Mn2 | 2.96  | 3.52  | 3.87  |
|       | $\alpha$ | Mn3 | 2.88  | 2.91  | 3.09  |
|       | $\alpha$ | Mn4 | 2.63  | 2.69  | 2.71  |
|       | $\alpha$ | O2  | 0.11  | -0.02 | -0.07 |
|       |          | O4  | 0.90  | 0.50  | -0.09 |
|       |          | O7  | 0.37  | 0.31  | 0.31  |

**Rea:**

|    |             |             |             |   |             |             |             |
|----|-------------|-------------|-------------|---|-------------|-------------|-------------|
| Ca | 2.40213400  | 0.15818500  | -1.40870600 | O | 2.61151200  | 2.72499200  | -1.66605600 |
| Mn | 0.09510200  | 1.97976200  | 0.14929800  | C | 2.18354600  | 5.10156200  | -1.78025000 |
| Mn | 1.31608400  | 0.20884700  | 1.91787000  | H | 1.33830000  | 5.42781400  | -2.40631900 |
| Mn | -0.23227200 | -1.55620000 | 0.42633600  | H | 2.15210700  | 5.74537200  | -0.88907200 |
| Mn | -0.07145300 | -2.77664000 | -2.12275300 | C | 3.50560800  | 5.26503100  | -2.53406100 |
| O  | 1.73222900  | 1.39952100  | 0.62836100  | H | 3.51117400  | 4.59064600  | -3.40095600 |
| O  | -0.38293600 | 0.35897500  | 1.06643200  | H | 4.33354100  | 4.93935700  | -1.88769700 |
| O  | 1.44562900  | -1.32007900 | 0.93890000  | C | 3.74288100  | 6.70899300  | -2.99026400 |
| O  | 0.24800300  | -1.21500300 | -1.30424200 | H | 2.94558200  | 7.04995900  | -3.66567000 |
| O  | -0.31849600 | -3.23733100 | -0.03113300 | H | 3.77005300  | 7.40004200  | -2.13592900 |
| O  | 4.69196300  | 0.97377100  | -2.06812500 | H | 4.69617200  | 6.80402900  | -3.52622800 |
| H  | 5.05667000  | 0.77460700  | -1.18049600 | N | -1.89901400 | 2.49889700  | -0.16953200 |
| H  | 4.43108500  | 1.91711300  | -2.04054700 | C | -2.55590500 | 2.54530800  | -1.38113200 |
| O  | 1.97011800  | -0.29145000 | -3.82189300 | H | -2.00260700 | 2.46023000  | -2.30626300 |
| H  | 2.75210500  | -0.77746000 | -4.13569700 | C | -3.90560300 | 2.68845900  | -1.16180800 |
| H  | 1.24166300  | -0.97562400 | -3.86475300 | N | -4.04509300 | 2.74399600  | 0.22075400  |
| O  | 0.18060500  | -2.36306700 | -3.71485300 | H | -4.93666700 | 2.61784400  | 0.70833000  |
| O  | -0.55699800 | -4.76828900 | -2.81933200 | C | -2.82088500 | 2.60801600  | 0.77663200  |
| H  | -0.52578200 | -4.48728100 | -3.75789500 | H | -2.62958000 | 2.56915900  | 1.83844100  |
| H  | 0.33192900  | -5.13921700 | -2.63821400 | C | -5.05062600 | 2.79069400  | -2.13554300 |
| O  | 3.18952200  | -2.10307600 | -1.83062000 | H | -5.06261900 | 3.78682100  | -2.60302900 |
| C  | 2.82763600  | -3.28437100 | -1.72736000 | H | -4.86270600 | 2.08151300  | -2.95366000 |
| O  | 1.60084600  | -3.70782800 | -1.80384700 | C | -6.46459700 | 2.54222600  | -1.54830200 |
| C  | 3.87445000  | -4.36530900 | -1.46161300 | H | -6.77020000 | 3.38942000  | -0.92399700 |
| H  | 4.74478300  | -4.12001000 | -2.08426600 | H | -7.17819100 | 2.47829400  | -2.38114400 |
| H  | 4.20137200  | -4.21358200 | -0.42153100 | C | -6.54315300 | 1.30242400  | -0.65925800 |
| C  | 3.42480400  | -5.81165200 | -1.67265700 | O | -6.45906900 | 1.39246100  | 0.57305600  |
| H  | 3.11488800  | -5.98588800 | -2.71200600 | N | -6.64759900 | 0.10555900  | -1.29207100 |
| H  | 2.58167300  | -6.06370300 | -1.01898200 | H | -6.68399300 | 0.09475500  | -2.30387800 |
| H  | 4.24641900  | -6.50468300 | -1.45078500 | C | -6.49675800 | -1.16830800 | -0.58057400 |
| O  | 0.80347900  | 3.59164600  | -0.60174500 | H | -7.07368900 | -1.09575300 | 0.34741900  |
| C  | 1.87920900  | 3.67328900  | -1.33212400 | H | -6.95553900 | -1.94584800 | -1.20449200 |

|   |             |             |             |   |             |             |             |
|---|-------------|-------------|-------------|---|-------------|-------------|-------------|
| C | -5.03401900 | -1.51264900 | -0.25110000 | O | 3.13466000  | 0.04466800  | 2.48586900  |
| H | -4.62387600 | -0.73976200 | 0.40775600  | C | 5.49339400  | -0.00899700 | 2.45597600  |
| H | -5.02381400 | -2.45096700 | 0.32159300  | H | 5.64645900  | 0.95908000  | 2.95121500  |
| C | -4.15387200 | -1.65337200 | -1.49644900 | H | 6.32094600  | -0.20117100 | 1.76726000  |
| H | -4.19838500 | -0.73020100 | -2.09602400 | H | 5.46657500  | -0.77481800 | 3.23946100  |
| H | -4.49421500 | -2.46701500 | -2.14996000 | O | 0.61840800  | -0.85668500 | 3.45072600  |
| C | -2.67161400 | -1.88453200 | -1.21615100 | C | -0.31406000 | -1.71163300 | 3.33904200  |
| O | -2.20716100 | -1.45045100 | -0.11737000 | O | -0.86517500 | -2.06486100 | 2.24910300  |
| O | -2.02397400 | -2.46529400 | -2.14171600 | C | -0.82523000 | -2.36302000 | 4.61376000  |
| O | -0.15209900 | 3.02567500  | 1.85503000  | H | -0.19253300 | -2.03204500 | 5.44550300  |
| C | 0.43693400  | 2.76937300  | 2.95550400  | H | -1.83980700 | -1.97275800 | 4.79238000  |
| O | 1.07982100  | 1.71207300  | 3.21608200  | C | -0.87690100 | -3.89793500 | 4.52661100  |
| C | 0.35971900  | 3.84486200  | 4.03097300  | H | 0.13560700  | -4.28147700 | 4.33147700  |
| H | -0.66440100 | 4.24184400  | 4.02363100  | H | -1.48944600 | -4.18269000 | 3.66183400  |
| H | 0.99795000  | 4.67055400  | 3.67955700  | C | -1.43246600 | -4.53298900 | 5.80535700  |
| C | 0.78118500  | 3.38893800  | 5.42819400  | H | -0.81853300 | -4.27708300 | 6.68015400  |
| H | 0.71788600  | 4.22569900  | 6.13529900  | H | -1.45674700 | -5.62735900 | 5.72359800  |
| H | 0.13547100  | 2.58121100  | 5.79384400  | H | -2.45721000 | -4.19013300 | 6.00715700  |
| H | 1.80945800  | 3.01169500  | 5.42543700  | O | 0.10499300  | 1.31137100  | -1.53306200 |
| O | 4.15125600  | 0.02064500  | 0.45885400  | H | -0.31776900 | 0.41878900  | -1.54927700 |
| C | 4.17200700  | 0.01634900  | 1.70516100  |   |             |             |             |

**TS:**

|    |             |             |             |   |             |             |             |
|----|-------------|-------------|-------------|---|-------------|-------------|-------------|
| Ca | 2.41217500  | -0.07897300 | -1.52927700 | O | 1.32855900  | -3.75735200 | -1.59948000 |
| Mn | 0.49842000  | 1.98423900  | 0.18674400  | C | 3.55211400  | -4.63528400 | -1.59694400 |
| Mn | 1.20417500  | -0.04841500 | 1.94394800  | H | 4.30751700  | -4.53895100 | -2.38803200 |
| Mn | -0.82394900 | -1.24072300 | 0.45483300  | H | 4.08249600  | -4.43284600 | -0.65403100 |
| Mn | -0.29885900 | -2.74413500 | -1.88872400 | C | 2.93969400  | -6.03612900 | -1.57488800 |
| O  | 1.91892700  | 0.97507100  | 0.62101700  | H | 2.43225200  | -6.26469400 | -2.52238100 |
| O  | -0.37764000 | 0.52031600  | 1.05607100  | H | 2.20961400  | -6.13590700 | -0.76335700 |
| O  | 0.65266900  | -2.06304600 | 1.06088800  | H | 3.71925300  | -6.79452000 | -1.42729200 |
| O  | -0.03755800 | -1.09559200 | -1.22172200 | O | 1.51253000  | 3.46576300  | -0.46638600 |
| O  | -0.49439200 | -3.03977200 | 0.27782500  | C | 2.59578000  | 3.39565600  | -1.18399700 |
| O  | 4.86446000  | 0.23601500  | -1.95031000 | O | 3.13849200  | 2.34982400  | -1.58469000 |
| H  | 5.09585800  | -0.18413300 | -1.09503600 | C | 3.17409200  | 4.76631800  | -1.52731200 |
| H  | 4.86697000  | 1.19993600  | -1.78963200 | H | 2.43630500  | 5.27096900  | -2.17113900 |
| O  | 1.77243700  | -0.49424400 | -3.89660200 | H | 3.20667200  | 5.35863500  | -0.60149500 |
| H  | 2.49748100  | -1.04051100 | -4.24753300 | C | 4.54362200  | 4.72757900  | -2.21002300 |
| H  | 1.01499600  | -1.14886000 | -3.83797200 | H | 4.47718700  | 4.10880600  | -3.11483500 |
| O  | -0.05429200 | -2.47960700 | -3.51202500 | H | 5.26400200  | 4.22515200  | -1.54798500 |
| O  | -0.91892800 | -4.78303300 | -2.36596400 | C | 5.05795100  | 6.12685600  | -2.56613700 |
| H  | -0.94420400 | -4.60924500 | -3.32887900 | H | 4.37219100  | 6.64035900  | -3.25470200 |
| H  | -0.02860800 | -5.15815700 | -2.19980500 | H | 5.16024500  | 6.75647300  | -1.67104100 |
| O  | 3.02329700  | -2.34623900 | -2.04797600 | H | 6.04096100  | 6.07601000  | -3.05197100 |
| C  | 2.57730200  | -3.47366300 | -1.77849000 | N | -1.37966400 | 2.87487800  | -0.11647600 |

|   |             |             |             |   |             |             |             |
|---|-------------|-------------|-------------|---|-------------|-------------|-------------|
| C | -1.95024400 | 3.14046400  | -1.34320600 | O | 1.40142100  | 1.37699900  | 3.28679500  |
| H | -1.34441600 | 3.16011300  | -2.23823500 | C | 1.21356100  | 3.60347200  | 4.13863800  |
| C | -3.30695200 | 3.29754200  | -1.19171600 | H | 0.31898100  | 4.24025000  | 4.14273700  |
| N | -3.54164700 | 3.14065800  | 0.16948200  | H | 2.03580700  | 4.25071800  | 3.79563400  |
| H | -4.47211900 | 2.99353000  | 0.57429400  | C | 1.51264900  | 3.03412300  | 5.52591300  |
| C | -2.36292700 | 2.87100800  | 0.77380500  | H | 1.65587800  | 3.84957100  | 6.24604100  |
| H | -2.25295600 | 2.63654500  | 1.82248000  | H | 0.68943200  | 2.40293000  | 5.88204500  |
| C | -4.37410400 | 3.56199900  | -2.22245400 | H | 2.41806700  | 2.41793100  | 5.51288600  |
| H | -4.25215500 | 4.57442700  | -2.63528700 | O | 3.92091400  | -0.88535800 | 0.40668500  |
| H | -4.21250900 | 2.87559500  | -3.06596800 | C | 3.89725800  | -1.03521600 | 1.64470900  |
| C | -5.83999000 | 3.43941600  | -1.73951200 | O | 2.87251800  | -0.83385300 | 2.41474700  |
| H | -6.07069100 | 4.23788800  | -1.02479900 | C | 5.13940600  | -1.49119000 | 2.39239900  |
| H | -6.49791700 | 3.58144600  | -2.60791900 | H | 5.48725100  | -0.68194300 | 3.04783300  |
| C | -6.15666200 | 2.12326700  | -1.02923400 | H | 5.93345000  | -1.76303600 | 1.69120200  |
| O | -6.11142200 | 2.03489800  | 0.20574600  | H | 4.89513600  | -2.34538900 | 3.03471400  |
| N | -6.44812400 | 1.05777400  | -1.81871100 | O | 0.13137400  | -0.91148200 | 3.40984300  |
| H | -6.48172300 | 1.19051100  | -2.82154700 | C | -1.04014000 | -1.38213200 | 3.29784700  |
| C | -6.67627300 | -0.28583300 | -1.27231600 | O | -1.70468600 | -1.48356400 | 2.21078800  |
| H | -7.37528100 | -0.18969700 | -0.43329700 | C | -1.72936000 | -1.87697900 | 4.55804100  |
| H | -7.17093200 | -0.87201300 | -2.05692900 | H | -1.07769600 | -1.66682700 | 5.41400700  |
| C | -5.39338700 | -0.97496300 | -0.78145000 | H | -2.65698200 | -1.29809700 | 4.68331400  |
| H | -4.93065200 | -0.34434100 | -0.01610100 | C | -2.07207900 | -3.37697500 | 4.48130100  |
| H | -5.67970300 | -1.91445700 | -0.28686600 | H | -1.14576500 | -3.94936700 | 4.32709100  |
| C | -4.37306400 | -1.26402900 | -1.89059600 | H | -2.69758900 | -3.55101200 | 3.59625700  |
| H | -4.23717900 | -0.36511800 | -2.51441200 | C | -2.78532200 | -3.87401100 | 5.74267700  |
| H | -4.69869800 | -2.06990500 | -2.55900900 | H | -2.16430700 | -3.72896500 | 6.63765900  |
| C | -2.98154700 | -1.60389800 | -1.37066400 | H | -3.01767800 | -4.94427700 | 5.66787300  |
| O | -2.60302300 | -0.98585800 | -0.31958500 | H | -3.73083300 | -3.33682600 | 5.90344000  |
| O | -2.29346600 | -2.43466400 | -2.02681800 | O | 0.38066600  | 1.40704100  | -1.52870400 |
| O | 0.48972500  | 2.96743600  | 1.96058500  | H | -0.20174200 | 0.60637800  | -1.56811800 |
| C | 1.01721300  | 2.56418200  | 3.04289800  |   |             |             |             |

**Pro:**

|    |             |             |             |   |             |             |             |
|----|-------------|-------------|-------------|---|-------------|-------------|-------------|
| Ca | 2.56361400  | 0.11935900  | -1.42398500 | H | 4.78374600  | 1.70342600  | -1.86471000 |
| Mn | 0.34074600  | 1.92330500  | 0.20489500  | O | 2.14354300  | -0.35919700 | -3.80371300 |
| Mn | 1.27731200  | 0.07819400  | 2.02643400  | H | 2.90385400  | -0.85673600 | -4.15009100 |
| Mn | -0.59950800 | -1.46571000 | 0.50003200  | H | 1.39962400  | -1.03562800 | -3.80247500 |
| Mn | -0.04717600 | -2.75063100 | -1.99866400 | O | 0.29870800  | -2.30242700 | -3.56453500 |
| O  | 1.89447000  | 1.19256000  | 0.72074500  | O | -0.61879000 | -4.70076100 | -2.77675900 |
| O  | -0.32361900 | 0.33567700  | 1.04507500  | H | -0.55939300 | -4.39158500 | -3.70440700 |
| O  | 0.50960400  | -2.89265000 | 0.90318900  | H | 0.25031100  | -5.11476800 | -2.59424100 |
| O  | 0.29136100  | -1.24085000 | -1.08624000 | O | 3.16982800  | -2.20281600 | -1.67709600 |
| O  | -0.56738600 | -3.31121900 | 0.09189900  | C | 2.78075900  | -3.37691400 | -1.57852800 |
| O  | 4.94150400  | 0.74195200  | -1.95229900 | O | 1.55045200  | -3.77217600 | -1.68472200 |
| H  | 5.24754900  | 0.44108100  | -1.07083200 | C | 3.79673500  | -4.47838000 | -1.28279100 |

|   |             |             |             |   |             |             |             |
|---|-------------|-------------|-------------|---|-------------|-------------|-------------|
| H | 4.69366500  | -4.24807300 | -1.87258300 | H | -4.80266900 | -0.52902000 | -0.05624700 |
| H | 4.08803600  | -4.33963500 | -0.23033000 | H | -5.34756900 | -2.18022200 | -0.33162800 |
| C | 3.32487500  | -5.91414200 | -1.51705500 | C | -4.14239800 | -1.36279300 | -1.93784400 |
| H | 3.04883100  | -6.07718200 | -2.56772000 | H | -4.06506800 | -0.42214800 | -2.50701200 |
| H | 2.45336800  | -6.14966700 | -0.89555800 | H | -4.41472800 | -2.14723200 | -2.65454100 |
| H | 4.12312100  | -6.62545800 | -1.26910000 | C | -2.73158600 | -1.65106100 | -1.43683200 |
| O | 1.15937100  | 3.51571800  | -0.47124200 | O | -2.38389900 | -1.10968100 | -0.33942900 |
| C | 2.26381900  | 3.58201900  | -1.15460600 | O | -2.00323700 | -2.37617200 | -2.17774100 |
| O | 2.95246400  | 2.61464600  | -1.52907900 | O | 0.09490500  | 2.94834900  | 1.94540400  |
| C | 2.66958300  | 5.01505300  | -1.49250800 | C | 0.54611400  | 2.62619400  | 3.08827100  |
| H | 1.86476000  | 5.43870700  | -2.11339300 | O | 1.05070100  | 1.50110800  | 3.39224800  |
| H | 2.65232000  | 5.59499900  | -0.55808600 | C | 0.48221500  | 3.69337900  | 4.17338400  |
| C | 4.02083400  | 5.14647400  | -2.19939800 | H | -0.48077800 | 4.20996300  | 4.06604800  |
| H | 4.01066800  | 4.53562600  | -3.11220600 | H | 1.24789300  | 4.43902100  | 3.90804200  |
| H | 4.80762900  | 4.72440500  | -1.55746000 | C | 0.69647400  | 3.18074400  | 5.59792800  |
| C | 4.35984600  | 6.60093200  | -2.54448800 | H | 0.66005000  | 4.01463200  | 6.31021900  |
| H | 3.60537800  | 7.03840100  | -3.21339100 | H | -0.07724600 | 2.45625100  | 5.88038400  |
| H | 4.40421100  | 7.22705900  | -1.64224500 | H | 1.66658400  | 2.68167600  | 5.69536800  |
| H | 5.33258700  | 6.67264900  | -3.04804500 | O | 4.19470400  | -0.34926500 | 0.46068600  |
| N | -1.60410800 | 2.60774300  | -0.19225200 | C | 4.12388200  | -0.54738200 | 1.68906300  |
| C | -2.15407700 | 2.81306700  | -1.43920300 | O | 3.02240200  | -0.63122900 | 2.37132100  |
| H | -1.53032700 | 2.79673500  | -2.32215400 | C | 5.38320700  | -0.73479400 | 2.51643000  |
| C | -3.51259900 | 2.98421500  | -1.31646400 | H | 5.47190100  | 0.09188400  | 3.23355300  |
| N | -3.76845400 | 2.89235300  | 0.04702000  | H | 6.26921500  | -0.76436400 | 1.87614600  |
| H | -4.70372100 | 2.76373000  | 0.44494100  | H | 5.30962600  | -1.66045900 | 3.09953300  |
| C | -2.59981600 | 2.64815900  | 0.68131100  | O | 0.43977500  | -1.15233100 | 3.34418500  |
| H | -2.50521400 | 2.47755400  | 1.74346500  | C | -0.72951900 | -1.65165700 | 3.30739100  |
| C | -4.56419500 | 3.22870100  | -2.36788400 | O | -1.45409400 | -1.74296100 | 2.26324100  |
| H | -4.45981100 | 4.24559200  | -2.77500800 | C | -1.30629500 | -2.15320100 | 4.62023700  |
| H | -4.36796300 | 2.55058800  | -3.21052000 | H | -0.46690500 | -2.53315000 | 5.21756500  |
| C | -6.03576000 | 3.06753500  | -1.91002400 | H | -1.68021600 | -1.26617400 | 5.15852400  |
| H | -6.31258700 | 3.88072600  | -1.22946600 | C | -2.41850400 | -3.19896500 | 4.48379100  |
| H | -6.68207500 | 3.14966400  | -2.79470200 | H | -2.03341400 | -4.06260900 | 3.92317800  |
| C | -6.30387400 | 1.76548900  | -1.15662300 | H | -3.23339200 | -2.78191600 | 3.87811400  |
| O | -6.31346000 | 1.73220000  | 0.08164400  | C | -2.95240000 | -3.65632200 | 5.84560600  |
| N | -6.47433300 | 0.64963500  | -1.91073100 | H | -2.15735700 | -4.10395800 | 6.45835100  |
| H | -6.43746800 | 0.73517500  | -2.91878100 | H | -3.74430300 | -4.40720700 | 5.72762200  |
| C | -6.54442000 | -0.69087200 | -1.31768300 | H | -3.37326800 | -2.81436000 | 6.41369100  |
| H | -7.24326800 | -0.64408400 | -0.47512500 | O | 0.35532600  | 1.28763800  | -1.49733900 |
| H | -6.97417300 | -1.35749300 | -2.07592900 | H | -0.11921100 | 0.41979700  | -1.50615000 |
| C | -5.18427000 | -1.21037200 | -0.82350600 |   |             |             |             |

**Table S16** Reaction parameters for the open-cubane O2 (oxo)-O4 (oxo/oxy) coupling with deprotonated Wx:

| Spin state | Spin topology<br>(Mn1~Mn4-O4/O10) | Gibbs Free energy (a.u.) |            |            |
|------------|-----------------------------------|--------------------------|------------|------------|
|            |                                   | Rea                      | TS         | Pro-O-O    |
| doublet    | $\alpha\alpha\beta\alpha$         | -3366.1933               | -3366.1487 | -3366.1788 |
|            | $\alpha\beta\alpha\alpha$         | -3366.2133               | -3366.1313 | -3366.1815 |
|            | $\alpha\beta\beta\alpha\alpha$    | -3366.1799               | -3366.1383 | -3366.1730 |
|            | $\beta\alpha\alpha\beta\alpha$    | -3366.2249               | -3366.1550 | -3366.1813 |
|            | $\beta\alpha\beta\alpha\alpha$    | -3366.2263               | -3366.1447 | -3366.1783 |
|            | $\beta\beta\alpha\alpha\alpha$    | -3366.2254               | -3366.1360 | -3366.1894 |
| sextet     | $\alpha\alpha\alpha\beta\beta$    | -3366.2275               | -3366.1588 | -3366.1808 |
|            | $\alpha\alpha\beta\alpha\beta$    | -3366.2279               | -3366.1397 | -3366.1495 |
|            | $\alpha\beta\alpha\alpha\beta$    | -3366.2247               | -3366.1584 | -3366.1866 |
|            | $\beta\alpha\alpha\alpha\beta$    | -3366.2111               | -3366.1260 | -3366.1415 |
| octet      | $\alpha\alpha\alpha\beta\alpha$   | -3366.2122               | -3366.1507 | -3366.1768 |
|            | $\alpha\alpha\beta\alpha\alpha$   | -3366.2149               | -3366.1478 | -3366.1795 |
|            | $\alpha\beta\alpha\alpha\alpha$   | -3366.2141               | -3366.1284 | -3366.1785 |
|            | $\beta\alpha\alpha\alpha\alpha$   | -3366.2235               | -3366.1427 | -3366.1838 |
| 12-et      | $\alpha\alpha\alpha\alpha\beta$   | -3366.2260               | -3366.1379 | -3366.1481 |
| 14-et      | $\alpha\alpha\alpha\alpha\alpha$  | -3366.2278               | -3366.1567 | -3366.1839 |

| Spin state | Spin topology<br>(Mn1~Mn4-O4/O10) | Relative Gibbs Free energy (kcal/mol) |                            |                        |                        |
|------------|-----------------------------------|---------------------------------------|----------------------------|------------------------|------------------------|
|            |                                   | $\Delta G^\ddagger(\text{Rea-TS})$    | $\Delta G(\text{Rea-Pro})$ | $\Delta G(\text{Rea})$ | $\Delta G(\text{Pro})$ |
| doublet    | $\alpha\alpha\beta\alpha$         | 28.0                                  | 9.1                        | 21.7                   | 6.7                    |
|            | $\alpha\beta\alpha\alpha$         | 51.5                                  | 20.0                       | 9.2                    | 5.0                    |
|            | $\alpha\beta\beta\alpha\alpha$    | 26.1                                  | 4.3                        | 30.1                   | 10.3                   |
|            | $\beta\alpha\alpha\beta\alpha$    | 43.9                                  | 27.4                       | 1.9                    | 5.1                    |
|            | $\beta\alpha\beta\alpha\alpha$    | 51.2                                  | 30.1                       | 1.0                    | 7.0                    |
|            | $\beta\beta\alpha\alpha\alpha$    | 56.1                                  | 22.6                       | 1.6                    | 0.0                    |
| sextet     | $\alpha\alpha\alpha\beta\beta$    | 43.1                                  | 29.3                       | 0.3                    | 5.4                    |
|            | $\alpha\alpha\beta\alpha\beta$    | 55.3                                  | 49.2                       | 0.0                    | 25.0                   |
|            | $\alpha\beta\alpha\alpha\beta$    | 41.6                                  | 23.9                       | 2.0                    | 1.8                    |
|            | $\beta\alpha\alpha\alpha\beta$    | 53.4                                  | 43.7                       | 10.5                   | 30.1                   |
| octet      | $\alpha\alpha\alpha\beta\alpha$   | 38.6                                  | 22.2                       | 9.9                    | 7.9                    |
|            | $\alpha\alpha\beta\alpha\alpha$   | 42.1                                  | 22.2                       | 8.2                    | 6.2                    |
|            | $\alpha\beta\alpha\alpha\alpha$   | 53.8                                  | 22.3                       | 8.7                    | 6.8                    |
|            | $\beta\alpha\alpha\alpha\alpha$   | 50.7                                  | 24.9                       | 2.8                    | 3.5                    |
| 12-et      | $\alpha\alpha\alpha\alpha\beta$   | 55.3                                  | 48.9                       | 1.2                    | 25.9                   |
| 14-et      | $\alpha\alpha\alpha\alpha\alpha$  | 44.6                                  | 27.5                       | 0.1                    | 3.5                    |

| Spin state | Spin topology<br>(Mn1~Mn4-O4/O10) | Mulliken spin density |      |         |      |
|------------|-----------------------------------|-----------------------|------|---------|------|
|            |                                   | Rea                   | TS   | Pro-O-O |      |
| doublet    | $\alpha$                          | Mn1                   | 2.67 | 2.68    | 2.71 |

|        |          |     |       |       |       |
|--------|----------|-----|-------|-------|-------|
|        | $\alpha$ | Mn2 | 2.92  | 3.50  | 3.82  |
|        | $\beta$  | Mn3 | -2.65 | -2.90 | -2.99 |
|        | $\beta$  | Mn4 | -2.85 | -2.92 | -2.93 |
|        |          | O2  | -0.09 | -0.09 | 0.09  |
|        | $\alpha$ | O4  | 0.68  | 0.46  | 0.13  |
|        |          | O10 | 0.37  | 0.37  | 0.34  |
|        | $\alpha$ | Mn1 | 2.81  | 2.80  | 2.79  |
|        | $\beta$  | Mn2 | -2.91 | -3.84 | -3.83 |
|        | $\alpha$ | Mn3 | 2.86  | 3.23  | 3.85  |
|        | $\beta$  | Mn4 | -2.83 | -2.66 | -2.73 |
|        |          | O2  | 0.00  | 0.39  | -0.06 |
|        | $\alpha$ | O4  | 0.03  | 0.10  | -0.06 |
|        |          | O10 | 0.90  | 0.88  | 0.87  |
|        | $\alpha$ | Mn1 | 2.79  | 2.80  | 2.75  |
|        | $\beta$  | Mn2 | -2.93 | -3.43 | -3.83 |
|        | $\beta$  | Mn3 | -2.70 | -2.82 | -3.03 |
|        | $\alpha$ | Mn4 | 3.81  | 3.84  | 3.85  |
|        |          | O2  | -0.05 | 0.01  | 0.10  |
|        | $\alpha$ | O4  | -0.78 | -0.51 | 0.10  |
|        |          | O5  | -0.35 | 0.11  | 0.04  |
|        |          | O10 | 0.85  | 0.84  | 0.85  |
|        | $\beta$  | Mn1 | -2.78 | -2.78 | -2.77 |
|        | $\alpha$ | Mn2 | 2.93  | 3.52  | 3.84  |
|        | $\alpha$ | Mn3 | 2.89  | 2.86  | 2.96  |
|        | $\beta$  | Mn4 | -2.83 | -3.80 | -3.81 |
|        |          | O2  | 0.05  | -0.05 | -0.05 |
|        | $\alpha$ | O4  | 0.01  | 0.43  | 0.00  |
|        |          | O10 | 0.70  | 0.52  | 0.46  |
|        | $\beta$  | Mn1 | -2.79 | -2.68 | -2.66 |
|        | $\alpha$ | Mn2 | 2.91  | 3.81  | 3.81  |
|        | $\beta$  | Mn3 | -2.87 | -2.92 | -2.92 |
|        | $\alpha$ | Mn4 | 2.86  | 2.78  | 2.89  |
|        |          | O2  | 0.00  | -0.31 | 0.06  |
|        | $\alpha$ | O4  | -0.02 | -0.11 | 0.01  |
|        |          | O10 | 0.69  | 0.15  | -0.34 |
|        | $\beta$  | Mn1 | -2.80 | -2.80 | -2.82 |
|        | $\beta$  | Mn2 | -2.93 | -3.86 | -3.84 |
|        | $\alpha$ | Mn3 | 2.88  | 3.39  | 3.91  |
|        | $\alpha$ | Mn4 | 2.90  | 2.96  | 2.92  |
|        |          | O2  | 0.00  | 0.39  | -0.03 |
|        | $\alpha$ | O4  | 0.13  | 0.14  | 0.02  |
|        |          | O10 | 0.69  | 0.70  | 0.69  |
| sextet | $\alpha$ | Mn1 | 2.82  | 2.86  | 2.86  |
|        | $\alpha$ | Mn2 | 2.95  | 3.56  | 3.86  |



|       |          |     |       |       |       |
|-------|----------|-----|-------|-------|-------|
|       | $\alpha$ | Mn3 | 2.91  | 2.80  | 2.91  |
|       | $\beta$  | Mn4 | -2.86 | -3.89 | -3.91 |
|       |          | O2  | 0.05  | -0.05 | -0.06 |
|       | $\beta$  | O4  | 0.01  | 0.42  | 0.00  |
|       |          | O5  | -0.13 | -0.12 | -0.13 |
|       |          | O10 | -0.68 | -0.54 | -0.58 |
|       | $\alpha$ | Mn1 | 2.81  | 2.82  | 2.82  |
|       | $\alpha$ | Mn2 | 2.94  | 3.85  | 3.84  |
|       | $\beta$  | Mn3 | -2.87 | -2.97 | -3.05 |
|       | $\alpha$ | Mn4 | 2.84  | 2.48  | 1.92  |
|       |          | O2  | 0.01  | -0.43 | 0.06  |
|       | $\beta$  | O4  | -0.01 | -0.08 | 0.07  |
|       |          | O10 | -0.66 | -0.63 | -0.55 |
|       | $\alpha$ | Mn1 | 2.80  | 2.80  | 2.80  |
|       | $\beta$  | Mn2 | -2.91 | -3.53 | -3.82 |
|       | $\alpha$ | Mn3 | 2.88  | 2.92  | 3.03  |
|       | $\alpha$ | Mn4 | 2.87  | 3.81  | 3.83  |
|       |          | O2  | 0.01  | 0.05  | -0.10 |
|       | $\beta$  | O4  | 0.14  | -0.47 | -0.15 |
|       |          | O10 | -0.68 | -0.35 | -0.35 |
|       | $\beta$  | Mn1 | -2.80 | -2.78 | -2.64 |
|       | $\alpha$ | Mn2 | 2.93  | 3.84  | 2.95  |
|       | $\alpha$ | Mn3 | 2.92  | 2.94  | 2.04  |
|       | $\alpha$ | Mn4 | 2.87  | 2.47  | 2.95  |
|       |          | O2  | 0.06  | -0.34 | -0.04 |
|       | $\beta$  | O4  | 0.13  | -0.13 | -0.09 |
|       |          | O10 | -0.89 | -0.86 | -0.38 |
|       | $\alpha$ | Mn1 | 2.82  | 2.69  | 2.71  |
|       | $\alpha$ | Mn2 | 2.94  | 3.56  | 3.85  |
|       | $\alpha$ | Mn3 | 2.90  | 2.86  | 2.96  |
|       | $\beta$  | Mn4 | -2.82 | -2.87 | -2.88 |
|       |          | O2  | 0.05  | -0.01 | -0.05 |
|       | $\alpha$ | O4  | 0.05  | 0.38  | 0.00  |
|       |          | O10 | 0.90  | 0.36  | 0.34  |
| octet | $\alpha$ | Mn1 | 2.81  | 2.68  | 2.71  |
|       | $\alpha$ | Mn2 | 2.93  | 3.49  | 3.83  |
|       | $\beta$  | Mn3 | -2.86 | -2.88 | -2.89 |
|       | $\alpha$ | Mn4 | 2.86  | 2.90  | 2.91  |
|       |          | O2  | 0.01  | -0.05 | 0.06  |
|       | $\alpha$ | O4  | -0.02 | 0.43  | 0.02  |
|       |          | O10 | 0.89  | 0.35  | 0.34  |
|       | $\alpha$ | Mn1 | 2.81  | 2.79  | 2.79  |
|       | $\beta$  | Mn2 | -2.91 | -3.84 | -3.83 |
|       | $\alpha$ | Mn3 | 2.88  | 3.37  | 3.92  |

|       |          |     |       |       |       |
|-------|----------|-----|-------|-------|-------|
|       | $\alpha$ | Mn4 | 2.91  | 2.95  | 2.91  |
|       |          | O2  | 0.01  | 0.43  | -0.02 |
|       | $\alpha$ | O4  | 0.13  | 0.15  | 0.03  |
|       |          | O10 | 0.90  | 0.89  | 0.88  |
|       | $\beta$  | Mn1 | -2.79 | -2.71 | -2.77 |
|       | $\alpha$ | Mn2 | 2.93  | 3.84  | 2.84  |
|       | $\alpha$ | Mn3 | 2.91  | 2.89  | 3.91  |
|       | $\alpha$ | Mn4 | 2.91  | 2.79  | 2.90  |
|       |          | O2  | 0.06  | -0.26 | -0.03 |
|       | $\alpha$ | O4  | 0.14  | -0.14 | 0.03  |
|       |          | O10 | 0.70  | 0.26  | -0.81 |
|       | $\alpha$ | Mn1 | 2.82  | 2.85  | 2.85  |
|       | $\alpha$ | Mn2 | 2.95  | 3.86  | 3.85  |
|       | $\alpha$ | Mn3 | 2.92  | 2.96  | 3.12  |
| 12-et | $\alpha$ | Mn4 | 2.87  | 2.45  | 1.91  |
|       |          | O2  | 0.07  | -0.35 | -0.09 |
|       | $\beta$  | O4  | 0.13  | -0.13 | -0.09 |
|       |          | O10 | -0.67 | -0.59 | -0.50 |
|       | $\alpha$ | Mn1 | 2.82  | 2.83  | 2.84  |
|       | $\alpha$ | Mn2 | 2.95  | 3.53  | 3.86  |
|       | $\alpha$ | Mn3 | 2.91  | 2.86  | 3.02  |
| 14-et | $\alpha$ | Mn4 | 2.86  | 3.84  | 3.82  |
|       |          | O2  | 0.05  | 0.00  | -0.09 |
|       | $\alpha$ | O4  | 0.01  | 0.35  | -0.13 |
|       |          | O10 | 0.69  | -0.33 | -0.32 |

**Rea:**

|    |             |             |             |   |             |             |             |
|----|-------------|-------------|-------------|---|-------------|-------------|-------------|
| Ca | -2.25862100 | -0.15255500 | -1.64928300 | O | 0.35831300  | 5.30998700  | -1.57396700 |
| Mn | 0.12743200  | -1.85889900 | -0.23014800 | H | -0.58410700 | 5.54472600  | -1.70596100 |
| Mn | -1.46212400 | -0.54517800 | 1.71655800  | H | 0.52412400  | 5.45693800  | -0.62187800 |
| Mn | -0.02830700 | 1.53354700  | 0.68726000  | O | -3.10986400 | 2.07224500  | -2.02749400 |
| Mn | -0.01954300 | 3.14349800  | -1.55436700 | C | -2.94385700 | 3.27707600  | -1.82409000 |
| O  | -1.62475100 | -1.55005200 | 0.26942800  | O | -1.80021400 | 3.85119600  | -1.55022600 |
| O  | 0.31359200  | -0.24631400 | 1.08818800  | C | -4.14406900 | 4.22108100  | -1.86181300 |
| O  | -1.69546500 | 1.11658900  | 0.90899200  | H | -4.73078600 | 3.93230900  | -2.74371600 |
| O  | -0.26971200 | 1.46662800  | -1.17304200 | H | -4.76373300 | 3.95313500  | -0.99282000 |
| O  | 0.05527900  | 3.32824400  | 0.32542600  | C | -3.83858700 | 5.71921300  | -1.86499200 |
| O  | -4.36236300 | -1.13962000 | -2.60943700 | H | -3.22640300 | 5.99903400  | -2.73228000 |
| H  | -4.82220600 | -1.10788300 | -1.74507500 | H | -3.30413600 | 6.01969600  | -0.95540400 |
| H  | -3.98354300 | -2.04067100 | -2.67487100 | H | -4.76997500 | 6.29753700  | -1.91316400 |
| O  | -1.01176700 | 0.34318000  | -3.78144900 | O | -0.35560000 | -3.48592800 | -1.08610300 |
| H  | -0.25126000 | -0.12735500 | -3.37569100 | C | -1.36058100 | -3.60188400 | -1.90323700 |
| H  | -0.74890700 | 1.29452800  | -3.75981700 | O | -2.14242500 | -2.69467800 | -2.24309300 |
| O  | -0.04419700 | 3.02680700  | -3.37295200 | C | -1.51248600 | -5.01994200 | -2.45379500 |
| H  | 0.88234400  | 3.03935100  | -3.67942500 | H | -0.60800500 | -5.23433800 | -3.04463100 |

|   |             |             |             |   |             |             |             |
|---|-------------|-------------|-------------|---|-------------|-------------|-------------|
| H | -1.47668700 | -5.71486800 | -1.60233500 | C | 2.55861000  | 2.29355400  | -0.67853800 |
| C | -2.76973300 | -5.24511200 | -3.29723800 | O | 2.05536000  | 1.72961700  | 0.32173800  |
| H | -2.78428600 | -4.52074600 | -4.12268900 | O | 1.92081200  | 2.96298500  | -1.57558300 |
| H | -3.65852900 | -5.03000700 | -2.68633700 | O | 0.43129800  | -3.05534400 | 1.50205800  |
| C | -2.85534100 | -6.67236800 | -3.84955300 | C | -0.27351300 | -3.01405900 | 2.54330800  |
| H | -1.99385400 | -6.90377500 | -4.49189400 | O | -1.10634800 | -2.08892000 | 2.83925900  |
| H | -2.87200200 | -7.41530100 | -3.03959700 | C | -0.16153800 | -4.16727100 | 3.53467200  |
| H | -3.76434000 | -6.81233800 | -4.44901100 | H | 0.86949500  | -4.54046400 | 3.48761800  |
| N | 2.16815500  | -2.15317800 | -0.46270500 | H | -0.79278700 | -4.97423300 | 3.12970600  |
| C | 2.88675600  | -1.88216400 | -1.60695100 | C | -0.58079500 | -3.83398900 | 4.96796100  |
| H | 2.37146200  | -1.57699900 | -2.50689100 | H | -0.49618200 | -4.72239700 | 5.60686300  |
| C | 4.22712700  | -2.05728300 | -1.35941500 | H | 0.05390300  | -3.04649200 | 5.39378100  |
| N | 4.30011400  | -2.45536800 | -0.02769400 | H | -1.61558300 | -3.47713100 | 5.00004900  |
| H | 5.15577500  | -2.42172500 | 0.52878200  | O | -4.17573000 | -0.39131400 | 0.03066000  |
| C | 3.04388900  | -2.48183500 | 0.47544900  | C | -4.29598300 | -0.59160500 | 1.25578500  |
| H | 2.79296200  | -2.72558000 | 1.49682700  | O | -3.33156900 | -0.63042200 | 2.12271200  |
| C | 5.41958600  | -1.92605200 | -2.26875600 | C | -5.66771200 | -0.83453300 | 1.86530100  |
| H | 5.52724700  | -2.82809000 | -2.89038000 | H | -6.45433200 | -0.61861600 | 1.13672500  |
| H | 5.21873600  | -1.10480100 | -2.97054400 | H | -5.79823400 | -0.21427200 | 2.75934500  |
| C | 6.78113600  | -1.68857400 | -1.56305800 | H | -5.74076600 | -1.88334500 | 2.18252000  |
| H | 7.13182400  | -2.61418600 | -1.09305800 | O | -1.09237200 | 0.46839700  | 3.46656100  |
| H | 7.52447000  | -1.40792600 | -2.32188100 | C | -0.30982800 | 1.45244900  | 3.54465600  |
| C | 6.70092700  | -0.64488600 | -0.45190700 | O | 0.29452000  | 2.00871500  | 2.56066900  |
| O | 6.58102700  | -0.97700200 | 0.73319700  | C | -0.05480800 | 2.08098800  | 4.90785400  |
| N | 6.70269900  | 0.65707700  | -0.84611300 | H | 0.99712800  | 2.39642600  | 4.93585300  |
| H | 6.77302500  | 0.86144400  | -1.83520800 | H | -0.64721300 | 3.01029900  | 4.93679100  |
| C | 6.38624500  | 1.75131500  | 0.07521500  | C | -0.40610600 | 1.18948100  | 6.10313500  |
| H | 6.91125100  | 1.55038600  | 1.01498900  | H | 0.18691100  | 0.26506900  | 6.05067000  |
| H | 6.80214100  | 2.67182600  | -0.35438600 | H | -1.45592100 | 0.88020600  | 6.02425100  |
| C | 4.88055100  | 1.90227200  | 0.35311600  | C | -0.15840000 | 1.89246900  | 7.44229600  |
| H | 4.51073000  | 0.99203500  | 0.83748000  | H | 0.89503300  | 2.18605700  | 7.55399300  |
| H | 4.74587800  | 2.71950200  | 1.07592500  | H | -0.41259300 | 1.23711200  | 8.28538400  |
| C | 4.06117700  | 2.18419000  | -0.91028100 | H | -0.76684600 | 2.80344700  | 7.53366900  |
| H | 4.18876000  | 1.36325500  | -1.63322800 | O | 0.10405200  | -0.98023700 | -1.65127800 |
| H | 4.38820300  | 3.10309400  | -1.41523600 |   |             |             |             |

**TS:**

|    |             |             |             |   |             |             |             |
|----|-------------|-------------|-------------|---|-------------|-------------|-------------|
| Ca | 2.33568100  | -0.27087700 | -1.62682900 | O | -0.04026100 | -1.48217600 | -1.01347300 |
| Mn | 0.32430900  | 1.91719900  | -0.37261000 | O | -0.25952000 | -3.08563000 | 0.84041500  |
| Mn | 1.30151700  | 0.41611900  | 1.82903500  | O | 4.75309600  | 0.12138000  | -2.17865900 |
| Mn | -0.68989400 | -1.17930100 | 0.75316900  | H | 5.04376100  | -0.10215200 | -1.27057100 |
| Mn | -0.19959100 | -3.22162500 | -1.08117000 | H | 4.66374300  | 1.09535700  | -2.20763000 |
| O  | 1.87748900  | 1.14713900  | 0.31393900  | O | 0.98667000  | -0.87166200 | -3.66320300 |
| O  | -0.42401100 | 0.58783500  | 0.94832700  | H | 0.27238900  | -0.30513000 | -3.30187100 |
| O  | 0.87295500  | -1.80334000 | 1.30561700  | H | 0.66759900  | -1.79482800 | -3.52358800 |

|   |             |             |             |   |             |             |             |
|---|-------------|-------------|-------------|---|-------------|-------------|-------------|
| O | -0.14913800 | -3.44666800 | -2.89269600 | N | -6.54610000 | 0.13207900  | -1.74720000 |
| H | -1.07295800 | -3.43582500 | -3.20723900 | H | -6.63566000 | 0.00354500  | -2.74696500 |
| O | -0.66613800 | -5.35216100 | -0.64550500 | C | -6.67246300 | -1.03358800 | -0.86658200 |
| H | 0.27365600  | -5.61808900 | -0.72955500 | H | -7.34985000 | -0.76339600 | -0.04788500 |
| H | -0.81806000 | -5.29600500 | 0.31878200  | H | -7.15121900 | -1.83006400 | -1.45018400 |
| O | 2.92364800  | -2.56404500 | -1.96977500 | C | -5.33478300 | -1.50087600 | -0.27165700 |
| C | 2.67833100  | -3.66235600 | -1.46495700 | H | -4.89191600 | -0.66751200 | 0.28231000  |
| O | 1.53154100  | -4.00393500 | -0.94345600 | H | -5.54412000 | -2.29483000 | 0.45982600  |
| C | 3.77146800  | -4.72371700 | -1.38600600 | C | -4.32999900 | -2.00994400 | -1.31477500 |
| H | 4.28530800  | -4.70515500 | -2.35594400 | H | -4.26741900 | -1.29027500 | -2.14772900 |
| H | 4.50168100  | -4.34514000 | -0.65493800 | H | -4.62403800 | -2.97566000 | -1.74338300 |
| C | 3.32492700  | -6.13935000 | -1.01949600 | C | -2.91030000 | -2.12410800 | -0.77832900 |
| H | 2.60342400  | -6.53069800 | -1.74909800 | O | -2.53797500 | -1.25422900 | 0.05909700  |
| H | 2.86155700  | -6.16628700 | -0.02559100 | O | -2.18658700 | -3.07345700 | -1.23563100 |
| H | 4.18572000  | -6.81982300 | -1.00640800 | O | 0.18536300  | 3.28567200  | 1.25145600  |
| O | 1.25603700  | 3.34331100  | -1.23206100 | C | 0.80376600  | 3.20542800  | 2.34644100  |
| C | 2.32338500  | 3.20411000  | -1.95301600 | O | 1.36828900  | 2.15266800  | 2.80098400  |
| O | 2.91467000  | 2.13154600  | -2.19296900 | C | 0.91365900  | 4.46895700  | 3.19527500  |
| C | 2.83055000  | 4.52246700  | -2.53617900 | H | -0.01626600 | 5.03573600  | 3.05773400  |
| H | 2.10002100  | 4.83316200  | -3.30056300 | H | 1.70600600  | 5.07684700  | 2.73041900  |
| H | 2.77279600  | 5.28546200  | -1.74742500 | C | 1.22161800  | 4.23306500  | 4.67497300  |
| C | 4.23511400  | 4.45430700  | -3.14142200 | H | 1.30849200  | 5.19016900  | 5.20535400  |
| H | 4.25755600  | 3.67097200  | -3.91057900 | H | 0.42847900  | 3.64740000  | 5.15687100  |
| H | 4.94896300  | 4.14179100  | -2.36486400 | H | 2.15913100  | 3.68008900  | 4.79694400  |
| C | 4.67919400  | 5.79306100  | -3.74129900 | O | 3.93507800  | -0.74695400 | 0.33153400  |
| H | 4.00060400  | 6.11443100  | -4.54411700 | C | 4.00481200  | -0.58325400 | 1.56628800  |
| H | 4.69227200  | 6.58792600  | -2.98224800 | O | 3.02818900  | -0.23883100 | 2.34658800  |
| H | 5.68852400  | 5.72217500  | -4.16729300 | C | 5.32257600  | -0.78637800 | 2.29791100  |
| N | -1.59539900 | 2.59494400  | -0.80193600 | H | 6.08178500  | -1.18927600 | 1.62151900  |
| C | -2.22753100 | 2.43971900  | -2.01558000 | H | 5.17695000  | -1.46415000 | 3.14721600  |
| H | -1.65777200 | 2.17330300  | -2.89447700 | H | 5.66314500  | 0.17466700  | 2.70505200  |
| C | -3.57854800 | 2.62879100  | -1.85760100 | O | 0.39021600  | -0.28555800 | 3.51490200  |
| N | -3.74918200 | 2.91952400  | -0.50739100 | C | -0.73135400 | -0.86163500 | 3.57133400  |
| H | -4.65014000 | 2.87380500  | -0.02658700 | O | -1.42884100 | -1.24189200 | 2.56384200  |
| C | -2.53490300 | 2.87080400  | 0.09056200  | C | -1.31879900 | -1.17438500 | 4.93884000  |
| H | -2.36362500 | 3.00329600  | 1.14871400  | H | -2.41002700 | -1.22954800 | 4.83449300  |
| C | -4.69050100 | 2.58077000  | -2.87186800 | H | -0.98136600 | -2.19327400 | 5.19220800  |
| H | -4.65420600 | 3.47377700  | -3.51427700 | C | -0.90566200 | -0.19694500 | 6.04588800  |
| H | -4.50625800 | 1.72714900  | -3.53945600 | H | -1.23992600 | 0.81579800  | 5.77609200  |
| C | -6.12898700 | 2.48893200  | -2.30575300 | H | 0.18944600  | -0.15441400 | 6.09346500  |
| H | -6.39904200 | 3.42764100  | -1.80828800 | C | -1.48379500 | -0.58787300 | 7.41010600  |
| H | -6.82249100 | 2.35832200  | -3.14802800 | H | -2.58255200 | -0.61181700 | 7.39010600  |
| C | -6.31763500 | 1.38483400  | -1.26753100 | H | -1.18016200 | 0.12601600  | 8.18664400  |
| O | -6.22851500 | 1.61956000  | -0.05619300 | H | -1.13657400 | -1.58393300 | 7.71929900  |

|             |             |             |             |   |             |             |             |
|-------------|-------------|-------------|-------------|---|-------------|-------------|-------------|
| O           | 0.25655000  | 0.98209300  | -1.76033600 |   |             |             |             |
| <b>Pro:</b> |             |             |             |   |             |             |             |
| Ca          | -2.32930300 | 0.09105100  | -1.72170000 | H | -3.85979200 | -6.95396400 | -3.23205300 |
| Mn          | -0.17896500 | -1.86270500 | -0.36265100 | H | -4.77831300 | -6.20787600 | -4.55338200 |
| Mn          | -1.50281900 | -0.62941000 | 1.80500200  | N | 1.82932500  | -2.32590200 | -0.68843800 |
| Mn          | 0.50981100  | 1.38211600  | 0.88632600  | C | 2.50799400  | -2.12528500 | -1.86964000 |
| Mn          | 0.12802800  | 3.27812200  | -1.18303500 | H | 1.96888100  | -1.83621500 | -2.76077900 |
| O           | -1.86857900 | -1.38365300 | 0.23127800  | C | 3.85164500  | -2.32989800 | -1.66887500 |
| O           | 0.24396600  | -0.36786400 | 0.98753200  | N | 3.96874300  | -2.67163100 | -0.32474400 |
| O           | -0.81106200 | 2.59075300  | 1.38199800  | H | 4.84922000  | -2.65151800 | 0.19265500  |
| O           | -0.16104600 | 1.59296600  | -0.87877300 | C | 2.73230800  | -2.64031400 | 0.22762700  |
| O           | 0.24868600  | 3.35138700  | 0.84032400  | H | 2.51571000  | -2.82858700 | 1.26862400  |
| O           | -4.60333400 | -0.51436400 | -2.57879800 | C | 5.00257000  | -2.27636100 | -2.63840000 |
| H           | -5.01129100 | -0.36030100 | -1.70152500 | H | 5.00121400  | -3.17240800 | -3.27774700 |
| H           | -4.40641500 | -1.47218500 | -2.62475400 | H | 4.83726100  | -1.42789400 | -3.31734200 |
| O           | -0.97220700 | 0.75070500  | -3.72098700 | C | 6.41466800  | -2.16792500 | -2.00975100 |
| H           | -0.25145100 | 0.20554100  | -3.33654500 | H | 6.68548900  | -3.11118100 | -1.52192500 |
| H           | -0.68092900 | 1.68346700  | -3.58243600 | H | 7.14188600  | -1.99931800 | -2.81604900 |
| O           | 0.09551000  | 3.31105300  | -3.00201100 | C | 6.51986000  | -1.08414600 | -0.93997700 |
| H           | 1.02610000  | 3.28867200  | -3.29733200 | O | 6.41344800  | -1.35325400 | 0.26231500  |
| O           | 0.60168200  | 5.42458500  | -0.97123600 | N | 6.68096800  | 0.19160200  | -1.38527400 |
| H           | -0.33469000 | 5.70393200  | -1.04740900 | H | 6.76176700  | 0.35193100  | -2.38132200 |
| H           | 0.80890700  | 5.50471800  | -0.01963200 | C | 6.63819200  | 1.34508900  | -0.48274400 |
| O           | -2.91094500 | 2.42112300  | -1.92381400 | H | 7.27134300  | 1.11652900  | 0.38211200  |
| C           | -2.74465300 | 3.55931600  | -1.48356900 | H | 7.08884000  | 2.19196100  | -1.01567500 |
| O           | -1.59694800 | 4.04536300  | -1.07785800 | C | 5.22153400  | 1.68498300  | 0.00857600  |
| C           | -3.93017600 | 4.51021100  | -1.35596700 | H | 4.82010600  | 0.82276800  | 0.55046800  |
| H           | -4.50955500 | 4.40296400  | -2.28233800 | H | 5.29904200  | 2.50857700  | 0.73320200  |
| H           | -4.56285500 | 4.08891400  | -0.56012600 | C | 4.25561300  | 2.07385200  | -1.11825900 |
| C           | -3.60570100 | 5.97642700  | -1.06800500 | H | 4.26179600  | 1.29152200  | -1.89462300 |
| H           | -2.98436800 | 6.41076600  | -1.86240000 | H | 4.54141100  | 3.01476600  | -1.60468600 |
| H           | -3.07417000 | 6.08735300  | -0.11518100 | C | 2.80686000  | 2.18338600  | -0.66698500 |
| H           | -4.52937600 | 6.56578000  | -1.00862100 | O | 2.40506700  | 1.38771500  | 0.22392000  |
| O           | -0.86408100 | -3.38322200 | -1.28766200 | O | 2.09132900  | 3.07272500  | -1.25260000 |
| C           | -1.89897000 | -3.36000000 | -2.06859000 | O | 0.08841200  | -3.20302700 | 1.27301700  |
| O           | -2.58672700 | -2.35932900 | -2.35533800 | C | -0.57401000 | -3.30012100 | 2.34820500  |
| C           | -2.22953500 | -4.73084700 | -2.65904600 | O | -1.32090900 | -2.39155800 | 2.83330800  |
| H           | -1.39286200 | -5.00513300 | -3.32115200 | C | -0.47663500 | -4.62231000 | 3.10565900  |
| H           | -2.20612700 | -5.46293500 | -1.83930400 | H | 0.55671800  | -4.98204000 | 3.01276400  |
| C           | -3.55615500 | -4.79559000 | -3.41990300 | H | -1.09156400 | -5.34186300 | 2.54224600  |
| H           | -3.55210700 | -4.03927900 | -4.21623600 | C | -0.92565100 | -4.56499700 | 4.56644900  |
| H           | -4.37625300 | -4.52028400 | -2.74068200 | H | -0.85438100 | -5.55728300 | 5.03077300  |
| C           | -3.82204100 | -6.18306000 | -4.01464300 | H | -0.30222100 | -3.87238700 | 5.14629600  |
| H           | -3.03276400 | -6.47090300 | -4.72353900 | H | -1.96138400 | -4.21710600 | 4.64380100  |

|   |             |             |             |   |             |             |             |
|---|-------------|-------------|-------------|---|-------------|-------------|-------------|
| O | -4.12680900 | 0.37425400  | -0.00226500 | H | 1.80718400  | 1.26096600  | 5.11195800  |
| C | -4.26207500 | 0.25593200  | 1.23635500  | H | 0.35273000  | 2.22407900  | 5.33799200  |
| O | -3.30297800 | 0.07914500  | 2.08055300  | C | 0.16610200  | 0.19725800  | 6.09956100  |
| C | -5.64704300 | 0.32339600  | 1.86050500  | H | 0.51886700  | -0.80860600 | 5.82862900  |
| H | -6.39671600 | 0.61376000  | 1.11882800  | H | -0.92759200 | 0.16693600  | 6.02073400  |
| H | -5.64655600 | 1.03492800  | 2.69460100  | C | 0.58846600  | 0.52784900  | 7.53496000  |
| H | -5.90304300 | -0.66041300 | 2.27589000  | H | 1.68251200  | 0.53746900  | 7.64108400  |
| O | -0.82249400 | 0.38715200  | 3.43761600  | H | 0.19160700  | -0.21140000 | 8.24259000  |
| C | 0.28477400  | 0.95547900  | 3.65038300  | H | 0.21742300  | 1.51588400  | 7.84237500  |
| O | 1.09003000  | 1.38286000  | 2.74520800  | O | -0.13260400 | -0.90921400 | -1.73886300 |
| C | 0.71088000  | 1.21166400  | 5.08681000  |   |             |             |             |

**Table S17** Reaction parameters for the closed-cubane O2 (oxo)-O4 (oxo/oxyl) coupling with deprotonated W1:

| Spin state | Spin topology<br>(Mn1~Mn4-O4/O10) | Gibbs Free energy (a.u.) |            |            |
|------------|-----------------------------------|--------------------------|------------|------------|
|            |                                   | Rea                      | TS         | Pro-O-O    |
| doublet    | $\alpha\alpha\beta\alpha$         | -3366.2057               | -3366.1670 | -3366.1945 |
|            | $\alpha\beta\alpha\beta$          | -3366.1984               | -3366.1467 | -3366.1860 |
|            | $\alpha\beta\beta\alpha$          | -3366.2062               | -3366.1389 | -3366.1564 |
|            | $\beta\alpha\beta\alpha$          | -3366.2008               | -3366.1782 | -3366.2081 |
|            | $\beta\alpha\beta\alpha$          | -3366.2078               | -3366.1686 | -3366.2013 |
|            | $\beta\beta\alpha\alpha$          | -3366.1967               | -3366.1477 | -3366.1892 |
| sextet     | $\alpha\alpha\alpha\beta\beta$    | -3366.2082               | -3366.1398 | -3366.1587 |
|            | $\alpha\alpha\beta\alpha\beta$    | -3366.2043               | -3366.1484 | -3366.1753 |
|            | $\alpha\beta\alpha\alpha\beta$    | -3366.2212               | -3366.1803 | -3366.2119 |
|            | $\beta\alpha\alpha\alpha\beta$    | -3366.2117               | -3366.1332 | -3366.1778 |
| octet      | $\alpha\alpha\alpha\beta\alpha$   | -3366.2049               | -3366.1708 | -3366.1998 |
|            | $\alpha\alpha\beta\alpha\alpha$   | -3366.2083               | -3366.1702 | -3366.2022 |
|            | $\alpha\beta\alpha\alpha\alpha$   | -3366.1966               | -3366.1397 | -3366.1579 |
|            | $\beta\alpha\alpha\alpha\alpha$   | -3366.1980               | -3366.1706 | -3366.2024 |
| 12-et      | $\alpha\alpha\alpha\alpha\beta$   | -3366.2230               | -3366.1532 | -3366.1698 |
| 14-et      | $\alpha\alpha\alpha\alpha\alpha$  | -3366.1998               | -3366.1704 | -3366.2004 |

  

| Spin state | Spin topology<br>(Mn1~Mn4-O4/O10) | Relative Gibbs Free energy (kcal/mol) |                            |                        |                        |
|------------|-----------------------------------|---------------------------------------|----------------------------|------------------------|------------------------|
|            |                                   | $\Delta G^\ddagger(\text{Rea-TS})$    | $\Delta G(\text{Rea-Pro})$ | $\Delta G(\text{Rea})$ | $\Delta G(\text{Pro})$ |
| doublet    | $\alpha\alpha\beta\alpha$         | 23.9                                  | 6.9                        | 10.9                   | 10.9                   |
|            | $\alpha\beta\alpha\beta$          | 31.9                                  | 7.7                        | 15.4                   | 16.3                   |
|            | $\alpha\beta\beta\alpha$          | 41.6                                  | 30.8                       | 10.5                   | 34.8                   |
|            | $\beta\alpha\beta\alpha$          | 14.0                                  | -4.5                       | 13.9                   | 2.4                    |
|            | $\beta\alpha\beta\alpha$          | 24.2                                  | 4.0                        | 9.5                    | 6.7                    |
|            | $\beta\beta\alpha\alpha$          | 30.3                                  | 4.6                        | 16.5                   | 14.2                   |
| sextet     | $\alpha\alpha\alpha\beta\beta$    | 42.2                                  | 30.6                       | 9.3                    | 33.4                   |

|            | $\alpha\alpha\beta\alpha\beta$   | 34.5                 | 17.9  | 11.7                  | 23.0    |  |
|------------|----------------------------------|----------------------|-------|-----------------------|---------|--|
|            | $\alpha\beta\alpha\alpha\beta$   | 25.3                 | 5.7   | 1.1                   | 0.0     |  |
|            | $\beta\alpha\alpha\alpha\beta$   | 48.5                 | 20.9  | 7.1                   | 21.4    |  |
| octet      | $\alpha\alpha\alpha\beta\alpha$  | 21.1                 | 3.1   | 11.4                  | 7.6     |  |
|            | $\alpha\alpha\beta\alpha\alpha$  | 23.5                 | 3.8   | 9.2                   | 6.1     |  |
|            | $\alpha\beta\alpha\alpha\alpha$  | 35.1                 | 23.9  | 16.6                  | 33.9    |  |
|            | $\beta\alpha\alpha\alpha\alpha$  | 16.9                 | -2.7  | 15.7                  | 6.0     |  |
| 12-et      | $\alpha\alpha\alpha\alpha\beta$  | 43.1                 | 32.9  | 0.0                   | 26.4    |  |
| 14-et      | $\alpha\alpha\alpha\alpha\alpha$ | 18.2                 | -0.4  | 14.6                  | 7.2     |  |
| Spin state | topology                         | Spin                 |       | Mulliken spin density |         |  |
|            |                                  | (Mn1~Mn4-<br>O4/O10) | Rea   | TS                    | Pro-O-O |  |
| doublet    | $\alpha$                         | Mn1                  | 2.93  | 2.93                  | 2.94    |  |
|            | $\alpha$                         | Mn2                  | 2.94  | 3.46                  | 3.86    |  |
|            | $\beta$                          | Mn3                  | -2.78 | -2.91                 | -3.04   |  |
|            | $\beta$                          | Mn4                  | -2.88 | -2.88                 | -2.91   |  |
|            | $\alpha$                         | O2                   | -0.01 | -0.02                 | 0.11    |  |
|            | $\alpha$                         | O4                   | 0.76  | 0.51                  | 0.14    |  |
|            | $\alpha$                         | Mn1                  | 2.93  | 2.94                  | 2.95    |  |
|            | $\beta$                          | Mn2                  | -2.92 | -2.82                 | -2.96   |  |
|            | $\alpha$                         | Mn3                  | 2.82  | 3.36                  | 3.84    |  |
|            | $\beta$                          | Mn4                  | -2.84 | -2.87                 | -2.90   |  |
|            | $\alpha$                         | O2                   | 0.07  | 0.05                  | 0.05    |  |
|            | $\alpha$                         | O4                   | 0.83  | 0.35                  | 0.07    |  |
|            | $\alpha$                         | Mn1                  | 2.92  | 2.91                  | 2.91    |  |
|            | $\beta$                          | Mn2                  | -2.93 | -2.46                 | -1.92   |  |
|            | $\beta$                          | Mn3                  | -2.85 | -2.94                 | -3.02   |  |
|            | $\alpha$                         | Mn4                  | 2.82  | 2.95                  | 2.90    |  |
|            | $\alpha$                         | O2                   | -0.03 | 0.07                  | 0.07    |  |
|            | $\alpha$                         | O4                   | 0.62  | 0.37                  | 0.03    |  |
|            | $\beta$                          | Mn1                  | -2.91 | -2.90                 | -2.88   |  |
|            | $\alpha$                         | Mn2                  | 2.93  | 3.46                  | 3.86    |  |
|            | $\alpha$                         | Mn3                  | 2.82  | 2.85                  | 3.00    |  |
|            | $\beta$                          | Mn4                  | -2.85 | -2.87                 | -2.90   |  |
|            | $\alpha$                         | O2                   | 0.07  | -0.04                 | -0.07   |  |
|            | $\alpha$                         | O4                   | 0.83  | 0.46                  | -0.03   |  |
| $\beta$    | Mn1                              | -2.93                | -2.92 | -2.91                 |         |  |
| $\alpha$   | Mn2                              | 2.93                 | 3.46  | 3.84                  |         |  |
| $\beta$    | Mn3                              | -2.84                | -2.94 | -3.04                 |         |  |
| $\alpha$   | Mn4                              | 2.83                 | 2.88  | 2.90                  |         |  |
| $\alpha$   | O2                               | -0.02                | -0.06 | 0.07                  |         |  |
| $\alpha$   | O4                               | 0.61                 | 0.45  | 0.05                  |         |  |
| $\beta$    | Mn1                              | -2.92                | -2.90 | -2.89                 |         |  |
| $\beta$    | Mn2                              | -2.94                | -2.83 | -2.97                 |         |  |

|        |          |     |       |       |       |
|--------|----------|-----|-------|-------|-------|
|        | $\alpha$ | Mn3 | 2.81  | 3.32  | 3.82  |
|        | $\alpha$ | Mn4 | 2.83  | 2.92  | 2.92  |
|        | $\alpha$ | O2  | 0.05  | 0.05  | 0.05  |
|        | $\alpha$ | O4  | 0.85  | 0.32  | 0.03  |
|        | $\alpha$ | Mn1 | 2.93  | 2.89  | 2.95  |
|        | $\alpha$ | Mn2 | 2.93  | 2.48  | 1.96  |
|        | $\alpha$ | Mn3 | 2.85  | 2.90  | 3.02  |
|        | $\beta$  | Mn4 | -2.83 | -2.93 | -2.90 |
|        | $\beta$  | O2  | 0.06  | -0.08 | -0.05 |
|        | $\beta$  | O4  | -0.62 | -0.30 | -0.02 |
|        | $\alpha$ | Mn1 | 2.85  | 2.78  | 2.79  |
|        | $\alpha$ | Mn2 | 2.88  | 2.91  | 2.87  |
|        | $\beta$  | Mn3 | -3.83 | -3.84 | -3.98 |
|        | $\alpha$ | Mn4 | 2.91  | 2.95  | 2.95  |
|        | $\beta$  | O2  | 0.06  | -0.01 | 0.09  |
|        | $\beta$  | O4  | 0.03  | 0.01  | 0.05  |
| sextet | $\alpha$ | Mn1 | 2.93  | 2.93  | 2.91  |
|        | $\beta$  | Mn2 | -2.93 | -3.46 | -3.85 |
|        | $\alpha$ | Mn3 | 2.83  | 2.94  | 3.04  |
|        | $\alpha$ | Mn4 | 2.87  | 2.89  | 2.91  |
|        | $\beta$  | O2  | 0.02  | 0.05  | -0.07 |
|        | $\beta$  | O4  | -0.61 | -0.49 | -0.11 |
|        | $\beta$  | Mn1 | -2.92 | -2.89 | -2.88 |
|        | $\alpha$ | Mn2 | 2.93  | 3.85  | 3.87  |
|        | $\alpha$ | Mn3 | 2.90  | 2.97  | 3.02  |
|        | $\alpha$ | Mn4 | 2.92  | 2.17  | 1.05  |
|        | $\beta$  | O2  | 0.03  | -0.18 | -0.08 |
|        | $\beta$  | O4  | 0.18  | -0.02 | -0.04 |
|        | $\alpha$ | Mn1 | 2.93  | 2.95  | 2.97  |
|        | $\alpha$ | Mn2 | 2.93  | 3.51  | 3.87  |
|        | $\alpha$ | Mn3 | 2.81  | 2.87  | 3.02  |
|        | $\beta$  | Mn4 | -2.80 | -2.87 | -2.90 |
|        | $\alpha$ | O2  | 0.06  | -0.02 | -0.06 |
|        | $\alpha$ | O4  | 0.09  | 0.45  | -0.02 |
|        | $\alpha$ | Mn1 | 2.93  | 2.94  | 2.95  |
|        | $\alpha$ | Mn2 | 2.94  | 3.49  | 3.86  |
|        | $\beta$  | Mn3 | -2.82 | -2.93 | -3.04 |
|        | $\alpha$ | Mn4 | 2.82  | 2.88  | 2.90  |
|        | $\alpha$ | O2  | 0.00  | -0.04 | 0.08  |
|        | $\alpha$ | O4  | 0.62  | 0.45  | 0.05  |
| octet  | $\alpha$ | Mn1 | 2.93  | 2.93  | 2.93  |
|        | $\beta$  | Mn2 | -2.92 | -2.49 | -1.92 |
|        | $\alpha$ | Mn3 | 2.82  | 2.92  | 3.05  |
|        | $\alpha$ | Mn4 | 2.83  | 2.96  | 2.90  |



|       |          |     |       |       |       |
|-------|----------|-----|-------|-------|-------|
|       | $\alpha$ | O2  | 0.07  | 0.09  | -0.08 |
|       |          | O4  | 0.85  | 0.35  | -0.09 |
|       | $\beta$  | Mn1 | -2.91 | -2.91 | -2.88 |
|       | $\alpha$ | Mn2 | 2.93  | 3.45  | 3.86  |
|       | $\alpha$ | Mn3 | 2.84  | 2.85  | 3.03  |
|       | $\alpha$ | Mn4 | 2.83  | 2.89  | 2.91  |
|       | $\alpha$ | O2  | 0.07  | -0.02 | -0.09 |
|       |          | O4  | 0.85  | 0.44  | -0.09 |
| 12-et | $\alpha$ | Mn1 | 2.93  | 2.91  | 2.96  |
|       | $\alpha$ | Mn2 | 2.92  | 2.46  | 1.96  |
|       | $\alpha$ | Mn3 | 2.91  | 2.91  | 3.03  |
|       | $\alpha$ | Mn4 | 2.93  | 2.89  | 2.90  |
|       | $\beta$  | O2  | 0.06  | -0.06 | -0.06 |
|       |          | O4  | -0.63 | -0.37 | -0.08 |
| 14-et | $\alpha$ | Mn1 | 2.93  | 2.95  | 2.97  |
|       | $\alpha$ | Mn2 | 2.93  | 3.49  | 3.87  |
|       | $\alpha$ | Mn3 | 2.84  | 2.86  | 3.03  |
|       | $\alpha$ | Mn4 | 2.83  | 2.89  | 2.90  |
|       | $\alpha$ | O2  | 0.10  | -0.01 | -0.07 |
|       |          | O4  | 0.85  | 0.42  | -0.08 |

**Rea:**

|    |             |             |             |   |             |             |             |
|----|-------------|-------------|-------------|---|-------------|-------------|-------------|
| Ca | -2.57960100 | 0.20713400  | -1.09886100 | C | -2.99454400 | 4.86150600  | -1.18666000 |
| Mn | -0.06670200 | -1.85851800 | -0.08791700 | H | -3.94556300 | 5.01407100  | -0.66542200 |
| Mn | -1.46943500 | -0.85226800 | 2.00310200  | H | -2.17406500 | 5.26491200  | -0.57992800 |
| Mn | 0.25197800  | 0.85825200  | 0.72162600  | C | -2.99209900 | 5.55916500  | -2.56009500 |
| Mn | 0.14950100  | 3.29796500  | -1.73576500 | H | -3.79349000 | 5.17463100  | -3.20498100 |
| O  | -1.77975500 | -1.68993900 | 0.42975500  | H | -2.03472000 | 5.41167600  | -3.07260100 |
| O  | 0.35819700  | -0.91034900 | 1.46496700  | H | -3.15371200 | 6.63662700  | -2.43061700 |
| O  | -1.50715200 | 0.74648000  | 1.14905200  | O | -0.46889900 | -2.82556300 | -1.68133000 |
| O  | -0.02772800 | -0.16285400 | -0.81587900 | C | -1.59642500 | -2.87248400 | -2.33803500 |
| O  | 0.07300000  | 2.46957500  | 0.02722700  | O | -2.52583500 | -2.05990300 | -2.21497900 |
| O  | -4.76789000 | -0.46981200 | -2.14283100 | C | -1.68061800 | -4.03800300 | -3.31619200 |
| H  | -5.21857000 | -0.61981800 | -1.28826900 | H | -0.80380000 | -3.97054100 | -3.97817800 |
| H  | -4.43454700 | -1.34454600 | -2.42789600 | H | -1.53636800 | -4.96235000 | -2.73596800 |
| O  | -1.80631100 | 0.60671400  | -3.45554500 | C | -2.97443100 | -4.09507400 | -4.13173200 |
| H  | -0.91030400 | 1.04535600  | -3.31727300 | H | -3.09965600 | -3.14777600 | -4.67384900 |
| H  | -2.33894700 | 1.30498900  | -3.87215000 | H | -3.83025600 | -4.17118200 | -3.44604300 |
| O  | 0.49592900  | 4.14964800  | -3.28514200 | C | -2.99258400 | -5.26968200 | -5.11621800 |
| H  | 0.73885000  | 3.42183700  | -3.89154500 | H | -2.16440400 | -5.20064800 | -5.83553600 |
| O  | 0.02922600  | 4.92115200  | -0.94640400 | H | -3.92897400 | -5.29261200 | -5.68848100 |
| H  | 0.22681300  | 5.57473000  | -1.64416700 | H | -2.89735500 | -6.23202700 | -4.59369500 |
| O  | -3.61760300 | 2.53514400  | -0.95846700 | N | 1.93369100  | -2.18950600 | -0.48831900 |
| C  | -2.77561600 | 3.37575900  | -1.30551100 | C | 2.62103800  | -1.94361600 | -1.65605300 |
| O  | -1.67199000 | 2.91004800  | -1.87578600 | H | 2.10080900  | -1.65020000 | -2.55772800 |

|   |             |             |             |   |             |             |             |
|---|-------------|-------------|-------------|---|-------------|-------------|-------------|
| C | 3.96679900  | -2.12793800 | -1.43786000 | C | -0.48680600 | -4.95755700 | 2.89661000  |
| N | 4.06798800  | -2.51229600 | -0.10591000 | H | 0.50442600  | -5.38281800 | 2.69165400  |
| H | 4.94805300  | -2.53623600 | 0.41860900  | H | -1.20209000 | -5.59846600 | 2.35729900  |
| C | 2.82947000  | -2.51601500 | 0.43168100  | H | -5.71354400 | -1.81512200 | 2.96416700  |
| H | 2.61029500  | -2.72711500 | 1.46791800  | C | -0.80032200 | -4.94205600 | 4.39339700  |
| C | 5.14253500  | -1.97296000 | -2.36914000 | H | -0.75396800 | -5.95991800 | 4.80071700  |
| H | 5.14567100  | -2.78562400 | -3.11065900 | H | -0.08256300 | -4.32060000 | 4.94297500  |
| H | 5.00035900  | -1.04750800 | -2.94483600 | H | -1.79981400 | -4.53606100 | 4.58195900  |
| C | 6.54330200  | -1.95520900 | -1.70218500 | O | -4.32375800 | -0.35441400 | 0.60701300  |
| H | 6.80419400  | -2.95539500 | -1.33857500 | C | -4.32848900 | -0.63580000 | 1.81830100  |
| H | 7.28411400  | -1.68260800 | -2.46625600 | O | -3.27146700 | -0.82779000 | 2.55515400  |
| C | 6.62938200  | -1.02152000 | -0.49602800 | C | -5.63079800 | -0.78987600 | 2.58161500  |
| O | 6.51699200  | -1.45559100 | 0.65886300  | H | -6.48182500 | -0.56359300 | 1.93379200  |
| N | 6.76292500  | 0.30435400  | -0.75609500 | H | -5.63156600 | -0.11847400 | 3.44862000  |
| H | 6.82030000  | 0.60550200  | -1.72121900 | O | -0.83890200 | 0.09373200  | 3.63966200  |
| C | 6.56707800  | 1.31780200  | 0.28646700  | C | 0.01162600  | 1.04212000  | 3.60856200  |
| H | 7.12176300  | 0.99165100  | 1.17244000  | O | 0.60457300  | 1.49854700  | 2.57469600  |
| H | 7.02012200  | 2.24984800  | -0.07350700 | C | 0.33749000  | 1.72752500  | 4.92336100  |
| C | 5.08566800  | 1.52284100  | 0.65197000  | H | -0.06298800 | 1.11958700  | 5.74285500  |
| H | 4.67756600  | 0.57979300  | 1.03098000  | H | 1.43127900  | 1.77283700  | 5.02207300  |
| H | 5.03090000  | 2.24916400  | 1.47543000  | C | -0.24149100 | 3.15666400  | 4.97090000  |
| C | 4.24344300  | 2.01208200  | -0.53187200 | H | -1.33226000 | 3.10565200  | 4.83953100  |
| H | 4.38123000  | 1.33754100  | -1.39165200 | H | 0.15234900  | 3.72618100  | 4.11880200  |
| H | 4.54073500  | 3.01641500  | -0.85536200 | C | 0.08978900  | 3.87104900  | 6.28488200  |
| C | 2.73544700  | 2.02102700  | -0.27996000 | H | -0.31650800 | 3.32804200  | 7.14952100  |
| O | 2.23911800  | 1.03508900  | 0.34950800  | H | -0.33219300 | 4.88419800  | 6.29779800  |
| O | 2.11261300  | 3.01429400  | -0.75998500 | H | 1.17608200  | 3.95926400  | 6.42672500  |
| O | 0.01684800  | -3.52085200 | 1.07111000  | O | 0.53183000  | 1.70928400  | -2.70262600 |
| C | -0.54843500 | -3.59533600 | 2.21559700  | H | 0.62169600  | 0.94860300  | -2.08344700 |
| O | -1.16100700 | -2.66322200 | 2.82377600  |   |             |             |             |

**TS:**

|    |             |             |             |   |             |            |             |
|----|-------------|-------------|-------------|---|-------------|------------|-------------|
| Ca | -2.51783700 | 0.31737000  | -1.16459000 | O | -1.84416000 | 0.63008100 | -3.54644500 |
| Mn | -0.09892000 | -1.95049400 | -0.06387500 | H | -0.95640300 | 1.07965200 | -3.36889100 |
| Mn | -1.40051900 | -0.79408100 | 2.06846300  | H | -2.38581400 | 1.32657100 | -3.95423400 |
| Mn | 0.59356100  | 0.65449500  | 0.67332400  | O | 0.38843500  | 4.18915200 | -3.01792700 |
| Mn | 0.07295300  | 3.20221700  | -1.54182900 | H | 0.68518200  | 3.51406300 | -3.66098200 |
| O  | -1.77148400 | -1.50540100 | 0.45512500  | O | -0.09261700 | 4.73008200 | -0.59219700 |
| O  | 0.45996400  | -1.04028000 | 1.46037300  | H | 0.32464700  | 5.42605300 | -1.13575300 |
| O  | -1.16435500 | 1.08725900  | 0.87706700  | O | -3.78031100 | 2.57803400 | -0.94709100 |
| O  | 0.18505800  | -0.31865100 | -0.84335100 | C | -2.89472700 | 3.37199300 | -1.29524000 |
| O  | -0.16235000 | 2.30251600  | 0.30642800  | O | -1.77217800 | 2.84540400 | -1.76323000 |
| O  | -4.75213600 | -0.32201700 | -2.14101400 | C | -3.07038100 | 4.86904800 | -1.28487700 |
| H  | -5.19384400 | -0.39498500 | -1.27207500 | H | -4.04851200 | 5.08406200 | -0.84100100 |
| H  | -4.46750300 | -1.22732400 | -2.37721600 | H | -2.28008500 | 5.28181700 | -0.64489300 |

|             |             |             |             |    |             |             |             |
|-------------|-------------|-------------|-------------|----|-------------|-------------|-------------|
| C           | -2.94857400 | 5.47762500  | -2.69470800 | H  | 5.19038600  | 2.49537700  | 1.15168800  |
| H           | -3.71488600 | 5.07316100  | -3.37006800 | C  | 4.27669600  | 2.24750300  | -0.80012800 |
| H           | -1.96076000 | 5.27260500  | -3.12275100 | H  | 4.44221600  | 1.62411000  | -1.69466500 |
| H           | -3.08746900 | 6.56514400  | -2.64500000 | H  | 4.51109300  | 3.28001400  | -1.08312100 |
| O           | -0.58796000 | -2.91599000 | -1.63169500 | C  | 2.77403200  | 2.15466800  | -0.54305600 |
| C           | -1.71713000 | -2.88514500 | -2.28564000 | O  | 2.38869400  | 1.10456600  | 0.08888500  |
| O           | -2.57512800 | -1.99577600 | -2.17856700 | O  | 2.05859600  | 3.07161600  | -1.01866700 |
| C           | -1.90065900 | -4.06094500 | -3.23748800 | O  | -0.22337900 | -3.60307000 | 1.10022500  |
| H           | -1.02699700 | -4.07530800 | -3.90704500 | C  | -0.72183400 | -3.59281000 | 2.27040500  |
| H           | -1.82289900 | -4.98158600 | -2.63900400 | O  | -1.19650600 | -2.58196200 | 2.88551600  |
| C           | -3.20165000 | -4.03423300 | -4.04313000 | C  | -0.77842800 | -4.93339900 | 2.99323100  |
| H           | -3.25965600 | -3.08976500 | -4.60113000 | H  | 0.13492600  | -5.48300300 | 2.73179800  |
| H           | -4.05538400 | -4.03406600 | -3.35049700 | H  | -1.60662800 | -5.49159500 | 2.52876200  |
| C           | -3.31619700 | -5.22125200 | -5.00601700 | H  | -5.66379100 | -1.30400600 | 3.09627400  |
| H           | -2.49118100 | -5.22713800 | -5.73222000 | C  | -0.97483000 | -4.84187700 | 4.50736200  |
| H           | -4.25636300 | -5.18343800 | -5.57119600 | H  | -1.02260500 | -5.84757800 | 4.94338600  |
| H           | -3.28919300 | -6.17884200 | -4.46702700 | H  | -0.14670800 | -4.30239600 | 4.98345400  |
| N           | 1.88375500  | -2.46315400 | -0.44924900 | H  | -1.90047500 | -4.31092100 | 4.75358500  |
| C           | 2.54375700  | -2.30265800 | -1.64759600 | O  | -4.24056900 | -0.12776700 | 0.59898400  |
| H           | 1.99577700  | -2.14979900 | -2.56717600 | C  | -4.24468600 | -0.30220400 | 1.82893200  |
| C           | 3.90091100  | -2.34315300 | -1.42857500 | O  | -3.18432400 | -0.47035100 | 2.56887400  |
| N           | 4.04176100  | -2.56205400 | -0.06407300 | C  | -5.54255400 | -0.32584400 | 2.61362800  |
| H           | 4.92542900  | -2.44820200 | 0.44487600  | H  | -6.39155500 | -0.12598200 | 1.95468900  |
| C           | 2.81031700  | -2.60553900 | 0.48878200  | H  | -5.50355700 | 0.42682400  | 3.41030600  |
| H           | 2.61727000  | -2.69049400 | 1.54841400  | O  | -0.68376800 | 0.23559400  | 3.58279600  |
| C           | 5.05113300  | -2.15990500 | -2.38598100 | C  | 0.33199900  | 1.00794000  | 3.54704400  |
| H           | 5.09666100  | -3.00809700 | -3.08492200 | O  | 1.02801900  | 1.28930400  | 2.51848400  |
| H           | 4.84160300  | -1.27554800 | -3.00447800 | C  | 0.71169100  | 1.68981100  | 4.84679600  |
| C           | 6.45791000  | -2.01562300 | -1.75092100 | H  | 0.65618000  | 0.94856300  | 5.65525500  |
| H           | 6.76713700  | -2.96412500 | -1.29690600 | H  | 1.74309800  | 2.05282100  | 4.76690400  |
| H           | 7.17233100  | -1.79235900 | -2.55513300 | C  | -0.24572600 | 2.86222400  | 5.15231100  |
| C           | 6.53836700  | -0.96333700 | -0.64486600 | H  | -1.27272900 | 2.47552200  | 5.20013300  |
| O           | 6.41686300  | -1.27840700 | 0.54786100  | H  | -0.21363100 | 3.57648100  | 4.31722100  |
| N           | 6.70012400  | 0.32698500  | -1.03299200 | C  | 0.11183900  | 3.57280000  | 6.46140200  |
| H           | 6.78904400  | 0.53158800  | -2.02040100 | H  | 0.06229100  | 2.88333200  | 7.31575900  |
| C           | 6.60738300  | 1.44079500  | -0.08081000 | H  | -0.58036000 | 4.40132300  | 6.65916600  |
| H           | 7.19987600  | 1.17099800  | 0.80014100  | H  | 1.12852600  | 3.98810100  | 6.42533400  |
| H           | 7.07889300  | 2.31225500  | -0.55192300 | O  | 0.39890000  | 1.68332500  | -2.64487400 |
| C           | 5.16183500  | 1.74586300  | 0.34784400  | H  | 0.63924400  | 0.88383000  | -2.12723000 |
| H           | 4.72813300  | 0.83689800  | 0.77704600  |    |             |             |             |
| <b>Pro:</b> |             |             |             |    |             |             |             |
| Ca          | -2.55537600 | 0.55929300  | -1.15876700 | Mn | 0.61269600  | 0.58946700  | 0.77876800  |
| Mn          | -0.14222000 | -1.86534200 | -0.29120900 | Mn | 0.26834500  | 3.37047200  | -1.23044400 |
| Mn          | -1.48780800 | -1.10542300 | 1.98852800  | O  | -1.79576000 | -1.40665700 | 0.23596900  |

|   |             |             |             |   |             |             |             |
|---|-------------|-------------|-------------|---|-------------|-------------|-------------|
| O | 0.37672300  | -1.16810800 | 1.36384500  | H | 2.49851800  | -2.88829800 | 1.29991000  |
| O | -1.11663100 | 1.37842300  | 0.81470700  | C | 5.09025700  | -2.01791200 | -2.46948700 |
| O | 0.24913900  | -0.16218400 | -0.84235400 | H | 5.12807200  | -2.78445300 | -3.25757800 |
| O | -0.08862000 | 2.32613700  | 0.57987100  | H | 4.93789400  | -1.06236800 | -2.99137500 |
| O | -4.82670000 | -0.00476200 | -2.06216200 | C | 6.47779700  | -2.00544600 | -1.77813400 |
| H | -5.18885200 | -0.13574600 | -1.16137600 | H | 6.73397200  | -3.01124100 | -1.42586200 |
| H | -4.57307500 | -0.89130200 | -2.38611200 | H | 7.22900200  | -1.72291200 | -2.52841500 |
| O | -1.74242300 | 1.07079100  | -3.45758300 | C | 6.55793300  | -1.08914400 | -0.55702100 |
| H | -0.83932900 | 1.45984000  | -3.22292600 | O | 6.38635500  | -1.53195300 | 0.58785500  |
| H | -2.22586000 | 1.81677400  | -3.85031300 | N | 6.77530400  | 0.23014100  | -0.79037900 |
| O | 0.67460900  | 4.48022400  | -2.58558300 | H | 6.90510600  | 0.54158700  | -1.74477900 |
| H | 0.95886500  | 3.85618700  | -3.28405600 | C | 6.68579400  | 1.23173800  | 0.27939800  |
| O | 0.13974800  | 4.79848500  | -0.13208200 | H | 7.24137900  | 0.84501000  | 1.14060600  |
| H | 0.60559000  | 5.52903100  | -0.58230100 | H | 7.19790900  | 2.13457200  | -0.07605700 |
| O | -3.65561700 | 2.89029400  | -0.89518100 | C | 5.23680600  | 1.53451900  | 0.69845000  |
| C | -2.70682500 | 3.66195700  | -1.09783400 | H | 4.76419800  | 0.59912700  | 1.01476600  |
| O | -1.57512700 | 3.11390400  | -1.51217200 | H | 5.26150100  | 2.19207200  | 1.57921300  |
| C | -2.80966900 | 5.16002700  | -0.96980100 | C | 4.40417100  | 2.18368000  | -0.41343600 |
| H | -3.79273100 | 5.38947300  | -0.54469800 | H | 4.57698300  | 1.65179700  | -1.36404500 |
| H | -2.02475000 | 5.48035600  | -0.27287600 | H | 4.68195900  | 3.23056900  | -0.58201400 |
| C | -2.60729700 | 5.86967900  | -2.32264700 | C | 2.89101400  | 2.12273100  | -0.21434700 |
| H | -3.36645900 | 5.55719800  | -3.05255500 | O | 2.45022200  | 1.05582000  | 0.34935000  |
| H | -1.61440100 | 5.65112300  | -2.73203200 | O | 2.22360100  | 3.08577700  | -0.66983800 |
| H | -2.69727900 | 6.95538400  | -2.19094600 | O | -0.34326100 | -3.66900300 | 0.59435700  |
| O | -0.61020200 | -2.57305900 | -1.99931800 | C | -0.88889600 | -3.87144200 | 1.72712000  |
| C | -1.74402700 | -2.47739300 | -2.63941700 | O | -1.40270600 | -2.98926800 | 2.48719700  |
| O | -2.61780400 | -1.62561500 | -2.41651000 | C | -0.95179300 | -5.31937000 | 2.19597200  |
| C | -1.91165000 | -3.52216800 | -3.73644600 | H | 0.01280300  | -5.78243400 | 1.94924400  |
| H | -1.04807700 | -3.42311700 | -4.41205000 | H | -1.69209300 | -5.81607200 | 1.54970700  |
| H | -1.80119500 | -4.51158800 | -3.26683000 | H | -6.04407500 | -1.59072000 | 2.32088100  |
| C | -3.22450200 | -3.42412600 | -4.51687800 | C | -1.31018000 | -5.50522800 | 3.67092300  |
| H | -3.31443800 | -2.41596100 | -4.94360000 | H | -1.34755400 | -6.57348600 | 3.91860400  |
| H | -4.06777200 | -3.53796700 | -3.82076600 | H | -0.56815300 | -5.02869500 | 4.32317700  |
| C | -3.32363200 | -4.47616800 | -5.62709600 | H | -2.28461200 | -5.06035400 | 3.89928700  |
| H | -2.50983400 | -4.36388300 | -6.35733400 | O | -4.18743800 | 0.02203400  | 0.63776100  |
| H | -4.27293500 | -4.38970500 | -6.17133800 | C | -4.29812200 | -0.46402000 | 1.78660900  |
| H | -3.26417800 | -5.49548800 | -5.22001800 | O | -3.33205600 | -0.93350400 | 2.50384700  |
| N | 1.84531300  | -2.40331100 | -0.67941300 | C | -5.66887400 | -0.56403700 | 2.43506400  |
| C | 2.55385700  | -2.13525100 | -1.82966800 | H | -6.37012100 | 0.12527500  | 1.95585600  |
| H | 2.04496200  | -1.85936200 | -2.74318300 | H | -5.60107900 | -0.35631300 | 3.50802900  |
| C | 3.90019700  | -2.25717300 | -1.57519000 | O | -0.84551100 | -0.14392100 | 3.57734300  |
| N | 3.98387900  | -2.63542700 | -0.24129700 | C | 0.17637900  | 0.61489700  | 3.67318400  |
| H | 4.85219000  | -2.61878800 | 0.30465300  | O | 0.90473200  | 1.01977200  | 2.71075400  |
| C | 2.73189400  | -2.69025900 | 0.26370200  | C | 0.52824800  | 1.10451800  | 5.06529700  |

|   |             |            |            |   |             |            |             |
|---|-------------|------------|------------|---|-------------|------------|-------------|
| H | 0.65282900  | 0.22212100 | 5.70982600 | H | -0.11972700 | 1.64863300 | 7.75347400  |
| H | 1.48332400  | 1.63997900 | 5.01955300 | H | -1.03935700 | 3.13628600 | 7.45546800  |
| C | -0.57719100 | 2.00911400 | 5.64748700 | H | 0.69164000  | 3.07357300 | 7.07464000  |
| H | -1.52258600 | 1.45103300 | 5.65132200 | O | 0.54520700  | 1.95357500 | -2.46294900 |
| H | -0.72100600 | 2.87289200 | 4.98214400 | H | 0.74913600  | 1.10341600 | -2.01315600 |
| C | -0.24159700 | 2.49365800 | 7.06138000 |   |             |            |             |

**Table S18** Reaction parameters for the closed-cubane O2 (oxo)-O4 (oxo/oxyl) coupling with deprotonated W2:

| Spin state | Spin topology<br>(Mn1~Mn4-O4)    | Gibbs Free energy (a.u.) |            |            |
|------------|----------------------------------|--------------------------|------------|------------|
|            |                                  | Rea                      | TS         | Pro-O-O    |
| doublet    | $\alpha\alpha\beta\alpha$        | -3366.2332               | -3366.1768 | -3366.2005 |
|            | $\alpha\beta\alpha\beta$         | -3366.2325               | -3366.1464 | -3366.1669 |
|            | $\alpha\beta\beta\alpha\alpha$   | -3366.2026               | -3366.1326 | -3366.1525 |
|            | $\beta\alpha\alpha\beta\alpha$   | -3366.2200               | -3366.1668 | -3366.1969 |
|            | $\beta\alpha\beta\alpha\alpha$   | -3366.2041               | -3366.1593 | -3366.1958 |
|            | $\beta\beta\alpha\alpha\alpha$   | -3366.1938               | -3366.1429 | -3366.1821 |
| sextet     | $\alpha\alpha\alpha\beta\beta$   | -3366.2034               | -3366.1353 | -3366.1431 |
|            | $\alpha\alpha\beta\alpha\beta$   | -3366.2507               | -3366.1472 | -3366.1656 |
|            | $\alpha\beta\alpha\alpha\beta$   | -3366.2166               | -3366.1694 | -3366.1985 |
|            | $\beta\alpha\alpha\alpha\beta$   | -3366.2453               | -3366.1635 | -3366.1519 |
| octet      | $\alpha\alpha\alpha\beta\alpha$  | -3366.2218               | -3366.1673 | -3366.1874 |
|            | $\alpha\alpha\beta\alpha\alpha$  | -3366.2027               | -3366.1649 | -3366.1956 |
|            | $\alpha\beta\alpha\alpha\alpha$  | -3366.1944               | -3366.1279 | -3366.1506 |
|            | $\beta\alpha\alpha\alpha\alpha$  | -3366.2039               | -3366.1602 | -3366.1965 |
| 12-et      | $\alpha\alpha\alpha\alpha\beta$  | -3366.2533               | -3366.1472 | -3366.1547 |
| 14-et      | $\alpha\alpha\alpha\alpha\alpha$ | -3366.1892               | -3366.1659 | -3366.1945 |

  

| Spin state | Spin topology<br>(Mn1~Mn4-O4/O10) | Relative Gibbs Free energy (kcal/mol) |                            |                        |                        |
|------------|-----------------------------------|---------------------------------------|----------------------------|------------------------|------------------------|
|            |                                   | $\Delta G^\ddagger(\text{Rea-TS})$    | $\Delta G(\text{Rea-Pro})$ | $\Delta G(\text{Rea})$ | $\Delta G(\text{Pro})$ |
| doublet    | $\alpha\alpha\beta\beta\alpha$    | 35.4                                  | 20.5                       | 12.6                   | 0.0                    |
|            | $\alpha\beta\alpha\beta\alpha$    | 54.0                                  | 41.2                       | 13.1                   | 21.1                   |
|            | $\alpha\beta\beta\alpha\alpha$    | 43.9                                  | 31.4                       | 31.8                   | 30.1                   |
|            | $\beta\alpha\alpha\beta\alpha$    | 33.4                                  | 14.5                       | 20.9                   | 2.3                    |
|            | $\beta\alpha\beta\alpha\alpha$    | 28.1                                  | 5.2                        | 30.9                   | 2.9                    |
|            | $\beta\beta\alpha\alpha\alpha$    | 31.9                                  | 7.3                        | 37.3                   | 11.5                   |
| sextet     | $\alpha\alpha\alpha\beta\beta$    | 42.7                                  | 37.8                       | 31.3                   | 36.0                   |
|            | $\alpha\alpha\beta\alpha\beta$    | 64.9                                  | 53.4                       | 1.6                    | 21.9                   |
|            | $\alpha\beta\alpha\alpha\beta$    | 29.6                                  | 11.4                       | 23.0                   | 1.3                    |
|            | $\beta\alpha\alpha\alpha\beta$    | 51.3                                  | 58.6                       | 5.0                    | 30.5                   |
| octet      | $\alpha\alpha\alpha\beta\alpha$   | 34.2                                  | 21.6                       | 19.8                   | 8.2                    |
|            | $\alpha\alpha\beta\alpha\alpha$   | 23.7                                  | 4.5                        | 31.8                   | 3.1                    |

|            | $\alpha\beta\alpha\alpha$  | 41.7                     | 27.5                  | 37.0  | 31.3    |       |
|------------|----------------------------|--------------------------|-----------------------|-------|---------|-------|
|            | $\beta\alpha\alpha\alpha$  | 27.4                     | 4.6                   | 31.0  | 2.5     |       |
| 12-et      | $\alpha\alpha\alpha\beta$  | 66.6                     | 61.9                  | 0.0   | 28.7    |       |
| 14-et      | $\alpha\alpha\alpha\alpha$ | 14.6                     | -3.3                  | 40.2  | 3.8     |       |
| Spin state | topology                   | Spin<br>(Mn1~Mn4-<br>O4) | Mulliken spin density |       |         |       |
|            |                            |                          | Rea                   | TS    | Pro-O-O |       |
| doublet    | $\alpha$                   | Mn1                      | 2.92                  | 2.93  | 2.94    |       |
|            | $\alpha$                   | Mn2                      | 2.93                  | 3.60  | 3.86    |       |
|            | $\beta$                    | Mn3                      | -2.90                 | -2.90 | -2.98   |       |
|            | $\beta$                    | Mn4                      | -1.91                 | -2.80 | -2.98   |       |
|            | $\alpha$                   | O2                       | 0.03                  | -0.12 | 0.07    |       |
|            |                            | O4                       | -0.01                 | 0.32  | 0.07    |       |
|            |                            | O7                       | -0.10                 | -0.02 | 0.03    |       |
|            |                            | $\alpha$                 | Mn1                   | 2.92  | 2.92    | 2.92  |
|            |                            | $\beta$                  | Mn2                   | -2.93 | -3.75   | -3.84 |
|            |                            | $\alpha$                 | Mn3                   | 2.89  | 2.91    | 3.08  |
|            |                            | $\beta$                  | Mn4                   | -1.83 | -1.24   | -0.83 |
|            |                            | $\alpha$                 | O2                    | 0.00  | 0.28    | -0.07 |
|            |                            |                          | O4                    | -0.02 | -0.12   | -0.06 |
|            |                            |                          | O7                    | -0.09 | -0.07   | -0.21 |
|            |                            | $\alpha$                 | Mn1                   | 2.91  | 2.90    | 2.89  |
|            |                            | $\beta$                  | Mn2                   | -2.93 | -2.42   | -1.92 |
|            |                            | $\beta$                  | Mn3                   | -2.84 | -2.88   | -3.01 |
|            |                            | $\alpha$                 | Mn4                   | 2.86  | 2.84    | 2.83  |
|            |                            | $\alpha$                 | O2                    | -0.03 | 0.06    | 0.08  |
|            |                            |                          | O4                    | 0.54  | 0.33    | 0.05  |
|            |                            |                          | O7                    | 0.02  | 0.15    | 0.16  |
|            |                            | $\beta$                  | Mn1                   | -2.93 | -2.91   | -2.89 |
|            |                            | $\alpha$                 | Mn2                   | 2.93  | 3.59    | 3.85  |
|            |                            | $\alpha$                 | Mn3                   | 2.83  | 2.88    | 3.00  |
|            |                            | $\beta$                  | Mn4                   | -2.64 | -2.59   | -2.72 |
|            |                            | $\alpha$                 | O2                    | 0.03  | -0.14   | -0.06 |
|            |                            |                          | O4                    | 0.07  | 0.37    | -0.03 |
|            |                            |                          | O7                    | 0.70  | -0.28   | -0.24 |
|            |                            | $\beta$                  | Mn1                   | -2.93 | -2.90   | -2.91 |
|            |                            | $\alpha$                 | Mn2                   | 2.94  | 3.84    | 3.85  |
|            | $\beta$                    | Mn3                      | -2.81                 | -2.94 | -3.02   |       |
|            | $\alpha$                   | Mn4                      | 2.74                  | 2.33  | 2.83    |       |
|            | $\alpha$                   | O2                       | -0.02                 | 0.45  | 0.07    |       |
|            |                            | O4                       | -0.02                 | -0.02 | 0.05    |       |
|            |                            | O7                       | 1.04                  | 0.19  | 0.17    |       |
|            | $\beta$                    | Mn1                      | -2.91                 | -2.90 | -2.88   |       |
|            | $\beta$                    | Mn2                      | -2.93                 | -2.75 | -3.01   |       |

|        |          |     |       |       |       |
|--------|----------|-----|-------|-------|-------|
|        | $\alpha$ | Mn3 | 2.87  | 3.25  | 3.81  |
|        | $\alpha$ | Mn4 | 2.84  | 2.82  | 2.85  |
|        | $\alpha$ | O2  | 0.03  | 0.04  | 0.05  |
|        |          | O4  | 0.61  | 0.34  | 0.06  |
|        |          | O7  | 0.09  | 0.18  | 0.16  |
|        | $\alpha$ | Mn1 | 2.92  | 2.89  | 2.95  |
|        | $\alpha$ | Mn2 | 2.93  | 2.43  | 1.97  |
|        | $\alpha$ | Mn3 | 2.85  | 2.88  | 3.01  |
|        | $\beta$  | Mn4 | -2.86 | -2.85 | -2.83 |
|        | $\beta$  | O2  | 0.06  | -0.05 | -0.06 |
|        |          | O4  | -0.54 | -0.31 | -0.03 |
|        |          | O7  | -0.02 | -0.15 | -0.16 |
|        | $\alpha$ | Mn1 | 2.92  | 2.94  | 2.95  |
|        | $\alpha$ | Mn2 | 2.93  | 3.76  | 3.86  |
|        | $\beta$  | Mn3 | -2.86 | -2.89 | -3.01 |
|        | $\alpha$ | Mn4 | 1.78  | 1.16  | 1.28  |
|        |          | O2  | 0.02  | -0.24 | 0.08  |
|        | $\beta$  | O4  | 0.04  | 0.15  | 0.07  |
|        |          | O7  | -0.02 | 0.10  | -0.32 |
| sextet | $\alpha$ | Mn1 | 2.92  | 2.92  | 2.91  |
|        | $\beta$  | Mn2 | -2.94 | -3.54 | -3.85 |
|        | $\alpha$ | Mn3 | 2.84  | 2.93  | 3.03  |
|        | $\alpha$ | Mn4 | 2.58  | 2.66  | 2.75  |
|        | $\beta$  | O2  | 0.02  | 0.14  | -0.06 |
|        |          | O4  | 0.14  | -0.42 | -0.09 |
|        |          | O7  | -0.59 | 0.28  | 0.27  |
|        | $\beta$  | Mn1 | -2.91 | -2.90 | -2.91 |
|        | $\alpha$ | Mn2 | 2.93  | 3.83  | 1.93  |
|        | $\alpha$ | Mn3 | 2.94  | 2.92  | 3.02  |
|        | $\alpha$ | Mn4 | 1.83  | 1.05  | 2.87  |
|        | $\beta$  | O2  | 0.03  | -0.26 | -0.07 |
|        |          | O4  | 0.03  | 0.04  | -0.06 |
|        |          | O7  | 0.18  | 0.21  | 0.05  |
|        | $\alpha$ | Mn1 | 2.93  | 2.95  | 2.97  |
|        | $\alpha$ | Mn2 | 2.93  | 3.56  | 3.88  |
|        | $\alpha$ | Mn3 | 2.84  | 2.87  | 3.00  |
|        | $\beta$  | Mn4 | -2.64 | -2.65 | -2.70 |
|        | $\alpha$ | O2  | 0.05  | -0.08 | -0.06 |
|        |          | O4  | 0.08  | 0.41  | -0.02 |
|        |          | O7  | 0.70  | -0.26 | -0.25 |
| octet  | $\alpha$ | Mn1 | 2.92  | 2.93  | 2.95  |
|        | $\alpha$ | Mn2 | 2.94  | 3.48  | 3.86  |
|        | $\beta$  | Mn3 | -2.81 | -2.92 | -3.02 |
|        | $\alpha$ | Mn4 | 2.86  | 2.82  | 2.83  |

|       |          |     |       |       |       |
|-------|----------|-----|-------|-------|-------|
|       | $\alpha$ | O2  | 0.01  | -0.04 | 0.08  |
|       |          | O4  | 0.54  | 0.47  | 0.06  |
|       |          | O7  | 0.02  | 0.17  | 0.17  |
|       | $\alpha$ | Mn1 | 2.92  | 2.93  | 2.92  |
|       | $\beta$  | Mn2 | -2.92 | -3.80 | -1.92 |
|       | $\alpha$ | Mn3 | 2.90  | 3.54  | 3.02  |
|       | $\alpha$ | Mn4 | 2.84  | 2.74  | 2.84  |
|       | $\alpha$ | O2  | 0.05  | 0.22  | -0.04 |
|       |          | O4  | 0.61  | 0.15  | -0.05 |
|       |          | O7  | 0.09  | 0.40  | 0.16  |
|       | $\beta$  | Mn1 | -2.92 | -2.89 | -2.88 |
|       | $\alpha$ | Mn2 | 2.93  | 3.83  | 3.86  |
|       | $\alpha$ | Mn3 | 2.87  | 2.88  | 3.00  |
|       | $\alpha$ | Mn4 | 2.79  | 2.39  | 2.83  |
|       | $\alpha$ | O2  | 0.04  | 0.38  | -0.07 |
|       |          | O4  | 0.16  | 0.07  | -0.06 |
|       |          | O7  | 1.06  | 0.22  | 0.17  |
| 12-et | $\alpha$ | Mn1 | 2.93  | 2.96  | 2.97  |
|       | $\alpha$ | Mn2 | 2.93  | 3.74  | 1.95  |
|       | $\alpha$ | Mn3 | 2.94  | 2.91  | 3.03  |
|       | $\alpha$ | Mn4 | 1.83  | 1.13  | 2.76  |
|       | $\beta$  | O2  | 0.05  | -0.22 | -0.06 |
|       |          | O4  | 0.04  | 0.18  | -0.07 |
|       |          | O7  | 0.17  | 0.12  | 0.26  |
| 14-et | $\alpha$ | Mn1 | 2.93  | 2.95  | 2.97  |
|       | $\alpha$ | Mn2 | 2.93  | 3.48  | 3.87  |
|       | $\alpha$ | Mn3 | 2.82  | 2.87  | 3.01  |
|       | $\alpha$ | Mn4 | 2.79  | 2.81  | 2.82  |
|       | $\alpha$ | O2  | 0.12  | -0.01 | -0.05 |
|       |          | O4  | 0.88  | 0.47  | -0.05 |
|       |          | O7  | 0.18  | 0.19  | 0.18  |

**Rea:**

|    |             |             |             |   |             |             |             |
|----|-------------|-------------|-------------|---|-------------|-------------|-------------|
| Ca | -2.71220600 | -0.05760000 | -0.91494200 | H | -4.54232800 | -2.06424400 | -1.60697500 |
| Mn | 0.19739900  | -1.78197700 | -0.14073300 | O | -3.88456200 | 0.37203100  | -3.23079000 |
| Mn | -0.99269700 | -0.73500200 | 2.06145600  | H | -4.72112100 | 0.75037500  | -2.91084300 |
| Mn | 0.31253100  | 0.99132700  | 0.37978600  | H | -3.25902700 | 1.12628200  | -3.31663700 |
| Mn | -0.77646500 | 3.10800900  | -2.11958400 | O | 0.14546300  | 3.15720600  | -3.44324900 |
| O  | -1.43620300 | -1.73490600 | 0.61477200  | O | -0.09978300 | 5.05769700  | -1.52694100 |
| O  | 0.72096000  | -0.65582600 | 1.26835000  | H | -0.73821300 | 5.23383800  | -0.80920700 |
| O  | -1.34488800 | 0.74568100  | 1.07993100  | H | 0.74538700  | 4.80648600  | -1.09214800 |
| O  | -0.03691900 | -0.19252300 | -0.99885400 | O | -3.75183400 | 2.14443400  | -0.81769800 |
| O  | -0.12189700 | 2.54025400  | -0.40190800 | C | -3.53104600 | 3.36025300  | -0.95044400 |
| O  | -4.97281700 | -1.28055300 | -1.21458200 | O | -2.42921900 | 3.88585000  | -1.39528300 |
| H  | -5.06051100 | -1.45051400 | -0.25546100 | C | -4.59665400 | 4.38863200  | -0.57340600 |



|            |             |             |             |    |             |             |             |
|------------|-------------|-------------|-------------|----|-------------|-------------|-------------|
| H          | -4.17315500 | 5.00637500  | 0.23306400  | H  | 4.70942100  | 0.94947100  | 0.42439600  |
| H          | -4.71671300 | 5.06898300  | -1.42872500 | H  | 5.06231400  | 2.53366000  | 1.11707600  |
| C          | -5.93275100 | 3.78072400  | -0.14893600 | C  | 4.10075600  | 2.60645800  | -0.82647000 |
| H          | -5.80535200 | 3.11424500  | 0.71152900  | H  | 4.20679800  | 2.12164500  | -1.80936500 |
| H          | -6.37341500 | 3.18742900  | -0.95945000 | H  | 4.31346700  | 3.67351700  | -0.96055400 |
| H          | -6.64539600 | 4.56976300  | 0.12365100  | C  | 2.62380000  | 2.43997500  | -0.46234700 |
| O          | -0.32134500 | -2.96481800 | -1.55195100 | O  | 2.23352500  | 1.27545700  | -0.13806700 |
| C          | -1.49552200 | -3.08975000 | -2.09558500 | O  | 1.89521500  | 3.46568300  | -0.54976300 |
| O          | -2.42381300 | -2.26641500 | -1.99798500 | O  | 0.65240900  | -3.31679100 | 1.12763600  |
| C          | -1.65433800 | -4.36245600 | -2.92089300 | C  | 0.27153700  | -3.33718600 | 2.34689500  |
| H          | -0.89180500 | -4.32822000 | -3.71484800 | O  | -0.36565400 | -2.42439800 | 2.95937400  |
| H          | -1.36637800 | -5.20880700 | -2.27958200 | C  | 0.60327500  | -4.60503800 | 3.12691400  |
| C          | -3.04777500 | -4.56882300 | -3.51974200 | H  | 1.61445400  | -4.91667400 | 2.83274000  |
| H          | -3.31776800 | -3.68855100 | -4.11823000 | H  | -0.07047700 | -5.38547100 | 2.73965500  |
| H          | -3.78644600 | -4.62277300 | -2.70671100 | H  | -4.87556100 | -0.34890600 | 4.23535100  |
| C          | -3.13228300 | -5.83626800 | -4.37754800 | C  | 0.46891700  | -4.48177500 | 4.64513800  |
| H          | -2.42755500 | -5.79529900 | -5.22007800 | H  | 0.70494400  | -5.43943500 | 5.12633900  |
| H          | -4.13984000 | -5.96682700 | -4.79295700 | H  | 1.15148000  | -3.72090600 | 5.04328500  |
| H          | -2.89402000 | -6.73472000 | -3.79082200 | H  | -0.54856100 | -4.19104300 | 4.92754200  |
| N          | 2.13883200  | -1.94330400 | -0.84650200 | O  | -4.05746800 | -0.62420600 | 1.20155200  |
| C          | 2.61836400  | -1.45597000 | -2.04203200 | C  | -3.83159800 | -0.81332500 | 2.41069800  |
| H          | 1.94958200  | -1.01522300 | -2.76801600 | O  | -2.65452400 | -0.84235000 | 2.95737400  |
| C          | 3.98361500  | -1.60805800 | -2.08122200 | C  | -4.96646600 | -1.04433800 | 3.39262200  |
| N          | 4.31514500  | -2.21817700 | -0.87614700 | H  | -4.89470900 | -2.06056200 | 3.80150200  |
| H          | 5.26528200  | -2.24684000 | -0.49798800 | H  | -5.93297700 | -0.91150900 | 2.89897100  |
| C          | 3.18144800  | -2.38182100 | -0.15766400 | O  | -0.25288300 | 0.42185800  | 3.50346700  |
| H          | 3.13745400  | -2.79931800 | 0.83732300  | C  | 0.45576700  | 1.45622900  | 3.26922400  |
| C          | 4.97923500  | -1.24385900 | -3.15146500 | O  | 0.81968300  | 1.88664100  | 2.12879500  |
| H          | 4.94059700  | -1.97651400 | -3.97173300 | C  | 0.89843100  | 2.25827600  | 4.48461100  |
| H          | 4.66446300  | -0.28782700 | -3.59214700 | H  | 1.58717900  | 3.04249600  | 4.14877800  |
| C          | 6.46015200  | -1.14360900 | -2.69763200 | H  | 0.00047500  | 2.75558000  | 4.88414100  |
| H          | 6.86806400  | -2.14318100 | -2.50962600 | C  | 1.53287200  | 1.39112200  | 5.58480500  |
| H          | 7.04395500  | -0.70292300 | -3.51730900 | H  | 2.41743000  | 0.87971200  | 5.17569800  |
| C          | 6.63860600  | -0.35351500 | -1.40383100 | H  | 0.82154200  | 0.60509200  | 5.86781700  |
| O          | 6.71940100  | -0.92654600 | -0.30964800 | C  | 1.93411000  | 2.21306000  | 6.81396200  |
| N          | 6.63757400  | 1.00188100  | -1.51262600 | H  | 2.66287300  | 2.99394100  | 6.55483000  |
| H          | 6.53389700  | 1.41210700  | -2.43255900 | H  | 2.38759100  | 1.57599500  | 7.58441100  |
| C          | 6.50771900  | 1.86845800  | -0.33805700 | H  | 1.06173600  | 2.70916200  | 7.26207600  |
| H          | 7.15196800  | 1.45436900  | 0.44420400  | O  | -1.58844200 | 1.50487600  | -2.60117200 |
| H          | 6.89623900  | 2.85806200  | -0.60996300 | H  | -0.97510800 | 1.08868400  | -3.23378400 |
| C          | 5.06093700  | 1.95803700  | 0.18025800  |    |             |             |             |
| <b>TS:</b> |             |             |             |    |             |             |             |
| Ca         | 2.60880100  | 0.18626900  | -1.28515700 | Mn | 1.16059700  | 0.59929300  | 1.99131300  |
| Mn         | -0.33463600 | 1.81155900  | 0.03087700  | Mn | -0.52083900 | -0.92371900 | 0.51876800  |

|    |             |             |             |   |             |             |             |
|----|-------------|-------------|-------------|---|-------------|-------------|-------------|
| Mn | 0.68068100  | -3.05001700 | -1.95505200 | H | -5.37377600 | 1.33370000  | 0.61850500  |
| O  | 1.37906800  | 1.59725600  | 0.43088200  | C | -3.30661600 | 1.79911600  | 0.70572400  |
| O  | -0.68887900 | 0.69130700  | 1.49164800  | H | -3.08522300 | 1.63177700  | 1.75024900  |
| O  | 1.41632600  | -0.88396100 | 0.69744400  | C | -5.56728600 | 1.80032400  | -2.18985900 |
| O  | -0.44462500 | 0.19893600  | -0.89040600 | H | -5.79443500 | 2.79967300  | -2.59027700 |
| O  | 0.65675200  | -2.26673800 | 0.16262900  | H | -5.23795200 | 1.20323100  | -3.05208100 |
| O  | 4.64751800  | 1.56390600  | -1.83312400 | C | -6.89292600 | 1.21671100  | -1.63785900 |
| H  | 4.90254000  | 1.70245600  | -0.89967000 | H | -7.35769000 | 1.92485000  | -0.94254400 |
| H  | 4.17961100  | 2.36702000  | -2.12844800 | H | -7.58636800 | 1.08594200  | -2.47998100 |
| O  | 3.08865800  | -0.24466000 | -3.80606800 | C | -6.72303400 | -0.09044200 | -0.86306600 |
| H  | 3.80406200  | -0.89162100 | -3.66788200 | O | -6.66161800 | -0.09497200 | 0.37447700  |
| H  | 2.27593300  | -0.79735100 | -3.83099800 | N | -6.59045200 | -1.22523900 | -1.59525600 |
| O  | 0.50650900  | -4.06633700 | -3.18293000 | H | -6.64621400 | -1.16333600 | -2.60415000 |
| O  | 0.17744100  | -4.75589700 | -0.38002000 | C | -6.26187300 | -2.51848200 | -0.98189200 |
| H  | 1.07198100  | -5.12412600 | -0.52388200 | H | -6.94194800 | -2.66971800 | -0.13583200 |
| H  | 0.28310900  | -4.18832700 | 0.41238800  | H | -6.47642200 | -3.29216500 | -1.72946700 |
| O  | 3.79547500  | -1.91658400 | -1.52257700 | C | -4.80826600 | -2.60810000 | -0.48733700 |
| C  | 3.59114000  | -3.13087800 | -1.32859100 | H | -4.64672000 | -1.83204100 | 0.26719100  |
| O  | 2.45448500  | -3.73241300 | -1.46259900 | H | -4.67994300 | -3.57510900 | 0.01973300  |
| C  | 4.73456500  | -4.05552500 | -0.91340300 | C | -3.77168500 | -2.46518100 | -1.60726900 |
| H  | 4.41336100  | -4.58416900 | -0.00403600 | H | -3.99826400 | -1.56862000 | -2.20750400 |
| H  | 4.82036800  | -4.83207600 | -1.68781400 | H | -3.78224200 | -3.31930100 | -2.29507000 |
| C  | 6.06733500  | -3.34076100 | -0.69465300 | C | -2.33327900 | -2.27013300 | -1.13942300 |
| H  | 5.98120000  | -2.57740700 | 0.08749600  | O | -2.19223500 | -1.66570500 | -0.00534300 |
| H  | 6.39844900  | -2.83508000 | -1.60909200 | O | -1.41326200 | -2.65411300 | -1.89257100 |
| H  | 6.84301400  | -4.05773900 | -0.39622900 | O | -0.38147500 | 3.33903800  | 1.34000200  |
| O  | -0.10182000 | 2.96732800  | -1.47219000 | C | 0.27222700  | 3.31134200  | 2.43406000  |
| C  | 0.95628700  | 3.12800500  | -2.21313800 | O | 0.94280300  | 2.33592400  | 2.90055800  |
| O  | 1.92646400  | 2.35223000  | -2.25924900 | C | 0.25527200  | 4.59575900  | 3.25481900  |
| C  | 0.90830800  | 4.38114400  | -3.08161200 | H | -0.75514900 | 5.01720100  | 3.17497300  |
| H  | 0.04496400  | 4.27042600  | -3.75701800 | H | 0.91556100  | 5.30159700  | 2.72678200  |
| H  | 0.65748600  | 5.22892600  | -2.42709400 | H | 5.30295400  | 0.04065300  | 3.55114600  |
| C  | 2.18368700  | 4.65424200  | -3.88284500 | C | 0.69081000  | 4.43753300  | 4.71219700  |
| H  | 2.42528000  | 3.77118600  | -4.48893800 | H | 0.66387500  | 5.40872700  | 5.22227300  |
| H  | 3.02553600  | 4.78685500  | -3.18725800 | H | 0.02840200  | 3.74944700  | 5.25168300  |
| C  | 2.05682900  | 5.89166700  | -4.77832800 | H | 1.70792000  | 4.03682800  | 4.77913400  |
| H  | 1.24408200  | 5.77329900  | -5.50878600 | O | 4.11856000  | 0.63666500  | 0.65105100  |
| H  | 2.98336800  | 6.07113400  | -5.33859400 | C | 4.05257000  | 0.63985100  | 1.89752700  |
| H  | 1.84283300  | 6.79426600  | -4.18866500 | O | 2.96620900  | 0.55201900  | 2.59270700  |
| N  | -2.40574300 | 2.05209900  | -0.23325300 | C | 5.31337900  | 0.77172400  | 2.73499900  |
| C  | -3.08089400 | 2.10912100  | -1.43206400 | H | 5.33893700  | 1.76988500  | 3.19265100  |
| H  | -2.55209800 | 2.29962600  | -2.35580300 | H | 6.20268500  | 0.63489900  | 2.11348700  |
| C  | -4.42012900 | 1.88147100  | -1.21561700 | O | 0.62404300  | -0.51400400 | 3.52252500  |
| N  | -4.53988200 | 1.71110000  | 0.15808400  | C | -0.23127600 | -1.45359000 | 3.40936300  |

|   |             |             |            |   |             |             |             |
|---|-------------|-------------|------------|---|-------------|-------------|-------------|
| O | -0.80137300 | -1.81180800 | 2.33077000 | C | -1.21033500 | -2.09855900 | 7.14256600  |
| C | -0.57925800 | -2.21878400 | 4.67567600 | H | -2.07013000 | -2.76830500 | 7.00158800  |
| H | -1.41326000 | -2.89429300 | 4.45187800 | H | -1.44365800 | -1.42757600 | 7.97936900  |
| H | 0.29397900  | -2.84316100 | 4.92328800 | H | -0.35240200 | -2.71760000 | 7.44027700  |
| C | -0.90443600 | -1.30425900 | 5.86867600 | O | 1.00571200  | -1.34208700 | -2.51612800 |
| H | -1.76621100 | -0.66971200 | 5.61184000 | H | 0.18451900  | -0.82886600 | -2.32965500 |
| H | -0.05702600 | -0.62746200 | 6.03546900 |   |             |             |             |

**Pro:**

|    |             |             |             |   |             |             |             |
|----|-------------|-------------|-------------|---|-------------|-------------|-------------|
| Ca | -2.59508500 | 0.29871700  | -1.23811600 | C | -2.14100800 | -2.88737600 | -5.27671400 |
| Mn | 0.39257800  | -1.65071700 | -0.60097100 | H | -2.44931700 | -1.85487400 | -5.48764100 |
| Mn | -1.11713600 | -1.67060200 | 1.59121800  | H | -2.94140900 | -3.32591300 | -4.66236600 |
| Mn | 0.43858400  | 0.67795600  | 0.93266300  | C | -2.00664400 | -3.67579200 | -6.58427700 |
| Mn | -0.65104400 | 3.59607300  | -0.80266800 | H | -1.23639900 | -3.23885200 | -7.23545600 |
| O  | -1.42119600 | -1.65507500 | -0.13983800 | H | -2.95104600 | -3.67995100 | -7.14368700 |
| O  | 0.64428100  | -1.18866500 | 1.22914600  | H | -1.72551400 | -4.72166900 | -6.39575900 |
| O  | -1.45665300 | 0.92894000  | 1.00204600  | N | 2.42077900  | -1.66629700 | -0.94980600 |
| O  | 0.38256800  | 0.18190900  | -0.79809300 | C | 3.08573100  | -1.24593600 | -2.07972900 |
| O  | -0.72142500 | 2.14732400  | 0.95093000  | H | 2.54757000  | -1.06632500 | -3.00005500 |
| O  | -4.60346500 | -0.81474600 | -2.27225300 | C | 4.42636800  | -1.11243900 | -1.79956200 |
| H  | -4.85133300 | -1.31665800 | -1.47194000 | N | 4.55730500  | -1.49393200 | -0.46989400 |
| H  | -4.07597300 | -1.41285500 | -2.83659700 | H | 5.39900100  | -1.33823100 | 0.09385000  |
| O  | -3.06113600 | 1.56433400  | -3.46931700 | C | 3.32962600  | -1.79655800 | 0.00737900  |
| H  | -3.76239300 | 2.13671000  | -3.10866200 | H | 3.11872900  | -2.05456900 | 1.03559500  |
| H  | -2.23810000 | 2.07835700  | -3.31176200 | C | 5.56601400  | -0.63898700 | -2.66599600 |
| O  | -0.42435300 | 4.95281300  | -1.62842600 | H | 5.77845700  | -1.38163900 | -3.44936400 |
| O  | -0.21988800 | 4.70084600  | 1.25027500  | H | 5.23567700  | 0.26506500  | -3.19726800 |
| H  | -1.08053100 | 5.15873200  | 1.18227700  | C | 6.90283100  | -0.34535600 | -1.93756800 |
| H  | -0.40685600 | 3.93095600  | 1.82574800  | H | 7.36802100  | -1.28052800 | -1.60620500 |
| O  | -3.78122700 | 2.36482700  | -0.77145000 | H | 7.58898000  | 0.12260700  | -2.65683700 |
| C  | -3.58653200 | 3.48077800  | -0.25008000 | C | 6.75015600  | 0.52129000  | -0.68701800 |
| O  | -2.45071300 | 4.09501500  | -0.18544100 | O | 6.71847800  | 0.01179400  | 0.44247700  |
| C  | -4.74616300 | 4.26103500  | 0.36811400  | N | 6.59193600  | 1.85479200  | -0.87871800 |
| H  | -4.44603600 | 4.54106500  | 1.38837600  | H | 6.60755800  | 2.21585600  | -1.82451300 |
| H  | -4.82522800 | 5.20997700  | -0.18298800 | C | 6.22566400  | 2.76080400  | 0.21773500  |
| C  | -6.07665400 | 3.50957400  | 0.36966500  | H | 6.89700400  | 2.55407500  | 1.05854500  |
| H  | -6.00148800 | 2.57523300  | 0.93832800  | H | 6.42355400  | 3.78247500  | -0.12940500 |
| H  | -6.38266400 | 3.24755600  | -0.64970900 | C | 4.76551400  | 2.60093400  | 0.67611700  |
| H  | -6.86531800 | 4.12635900  | 0.81958100  | H | 4.62041900  | 1.57926700  | 1.04132800  |
| O  | 0.17900600  | -2.12660800 | -2.46329300 | H | 4.60197000  | 3.26897400  | 1.53378000  |
| C  | -0.89632300 | -2.05297700 | -3.17906400 | C | 3.74858300  | 2.90786100  | -0.42700700 |
| O  | -1.90440900 | -1.37077500 | -2.90365000 | H | 3.99688200  | 2.32985200  | -1.33218800 |
| C  | -0.84065200 | -2.86828300 | -4.46943000 | H | 3.76132200  | 3.96555400  | -0.71802800 |
| H  | -0.01926500 | -2.45374100 | -5.07540700 | C | 2.30047000  | 2.54069400  | -0.11547300 |
| H  | -0.52044500 | -3.88696900 | -4.20483300 | O | 2.12432700  | 1.59178700  | 0.74068200  |

|   |             |             |             |   |             |             |             |
|---|-------------|-------------|-------------|---|-------------|-------------|-------------|
| O | 1.40973900  | 3.15125900  | -0.74771400 | H | -6.18354700 | -1.78389000 | 1.55858500  |
| O | 0.53287800  | -3.62778400 | -0.09355300 | O | -0.80884500 | -0.90196400 | 3.42951000  |
| C | -0.00090800 | -4.13292100 | 0.92441500  | C | -0.04142900 | 0.06079800  | 3.74727600  |
| O | -0.71816600 | -3.49569500 | 1.79074200  | O | 0.54902500  | 0.84831400  | 2.93718700  |
| C | 0.16041100  | -5.62306300 | 1.17554200  | C | 0.16273600  | 0.32572500  | 5.23164200  |
| H | 1.06386600  | -5.94436600 | 0.64452000  | H | 1.00841600  | 1.01448000  | 5.34481000  |
| H | -0.68929400 | -6.10841500 | 0.66955300  | H | -0.73589400 | 0.85822400  | 5.58363500  |
| H | -5.34939900 | -1.77530700 | 3.14506400  | C | 0.36037000  | -0.94895700 | 6.06613400  |
| C | 0.18990300  | -6.02352500 | 2.65419700  | H | 1.25200800  | -1.48267700 | 5.70349900  |
| H | 0.29044000  | -7.11176000 | 2.74679600  | H | -0.49249800 | -1.61822500 | 5.89694100  |
| H | 1.03751800  | -5.55949800 | 3.17425700  | C | 0.51238200  | -0.64763300 | 7.56073200  |
| H | -0.72803900 | -5.71363400 | 3.16442300  | H | 1.37527400  | 0.00510100  | 7.75334900  |
| O | -4.10270900 | -0.88487300 | 0.41447600  | H | 0.65711400  | -1.57059000 | 8.13706400  |
| C | -4.03439900 | -1.56979700 | 1.45389900  | H | -0.38002500 | -0.14319000 | 7.95715800  |
| O | -2.94603900 | -1.87767800 | 2.08745800  | O | -0.97699400 | 2.16754900  | -1.88473300 |
| C | -5.29545200 | -2.11512600 | 2.10360500  | H | -0.16710300 | 1.60429100  | -1.83968400 |
| H | -5.25591300 | -3.21184500 | 2.12395600  |   |             |             |             |

**Table S19** Reaction parameters for the closed-cubane O2 (oxo)-O4 (oxo/oxy) coupling with deprotonated Wx:

| Spin state | Spin topology<br>(Mn1~Mn4-O2/O4/O7) | Gibbs Free energy (a.u.) |            |            |
|------------|-------------------------------------|--------------------------|------------|------------|
|            |                                     | Rea                      | TS         | Pro-O-O    |
| doublet    | $\alpha\alpha\beta\alpha$           | -3366.2469               | -3366.1697 | -3366.1991 |
|            | $\alpha\beta\alpha\beta$            | -3366.2503               | -3366.1572 | -3366.1609 |
|            | $\alpha\beta\beta\alpha\alpha$      | -3366.2147               | -3366.1415 | -3366.1659 |
|            | $\beta\alpha\alpha\beta\alpha$      | -3366.2511               | -3366.1775 | -3366.2002 |
|            | $\beta\alpha\beta\alpha\alpha$      | -3366.2009               | -3366.1675 | -3366.2034 |
|            | $\beta\beta\alpha\alpha\alpha$      | -3366.2115               | -3366.1393 | -3366.1650 |
| sextet     | $\alpha\alpha\alpha\beta\beta$      | -3366.2170               | -3366.1410 | -3366.1644 |
|            | $\alpha\alpha\beta\alpha\beta$      | -3366.2459               | -3366.1707 | -3366.1728 |
|            | $\alpha\beta\alpha\alpha\beta$      | -3366.2436               | -3366.1699 | -3366.1999 |
|            | $\beta\alpha\alpha\alpha\beta$      | -3366.2498               | -3366.1654 | -3366.1703 |
| octet      | $\alpha\alpha\alpha\beta\alpha$     | -3366.2541               | -3366.1709 | -3366.1958 |
|            | $\alpha\alpha\beta\alpha\alpha$     | -3366.1947               | -3366.1686 | -3366.2040 |
|            | $\alpha\beta\alpha\alpha\alpha$     | -3366.2151               | -3366.1359 | -3366.1489 |
|            | $\beta\alpha\alpha\alpha\alpha$     | -3366.1968               | -3366.1653 | -3366.2041 |
| 12-et      | $\alpha\alpha\alpha\alpha\beta$     | -3366.2493               | -3366.1572 | -3366.1745 |
| 14-et      | $\alpha\alpha\alpha\alpha\alpha$    | -3366.1875               | -3366.1637 | -3366.2023 |

  

| Spin state | Spin topology<br>(Mn1~Mn4-O4/O10) | Relative Gibbs Free energy (kcal/mol) |                            |                        |                        |
|------------|-----------------------------------|---------------------------------------|----------------------------|------------------------|------------------------|
|            |                                   | $\Delta G^\ddagger(\text{Rea-TS})$    | $\Delta G(\text{Rea-Pro})$ | $\Delta G(\text{Rea})$ | $\Delta G(\text{Pro})$ |
| doublet    | $\alpha\alpha\beta\beta\alpha$    | 48.4                                  | 30.0                       | 4.5                    | 3.1                    |

|        |                                  |      |      |      |      |
|--------|----------------------------------|------|------|------|------|
|        | $\alpha\beta\alpha\beta\alpha$   | 58.4 | 56.1 | 2.4  | 27.1 |
|        | $\alpha\beta\beta\alpha\alpha$   | 45.9 | 30.6 | 24.7 | 24.0 |
|        | $\beta\alpha\alpha\beta\alpha$   | 46.2 | 31.9 | 1.9  | 2.4  |
|        | $\beta\alpha\beta\alpha\alpha$   | 21.0 | -1.6 | 33.4 | 0.4  |
|        | $\beta\beta\alpha\alpha\alpha$   | 45.3 | 29.2 | 26.7 | 24.5 |
| sextet | $\alpha\alpha\alpha\beta\beta$   | 47.7 | 33.0 | 23.3 | 24.9 |
|        | $\alpha\alpha\beta\alpha\beta$   | 47.2 | 45.9 | 5.1  | 19.6 |
|        | $\alpha\beta\alpha\alpha\beta$   | 46.2 | 27.4 | 6.6  | 2.6  |
|        | $\beta\alpha\alpha\alpha\beta$   | 53.0 | 49.9 | 2.7  | 21.2 |
| octet  | $\alpha\alpha\alpha\beta\alpha$  | 52.2 | 36.6 | 0.0  | 5.2  |
|        | $\alpha\alpha\beta\alpha\alpha$  | 16.4 | -5.8 | 37.3 | 0.1  |
|        | $\alpha\beta\alpha\alpha\alpha$  | 49.7 | 41.5 | 24.5 | 34.6 |
|        | $\beta\alpha\alpha\alpha\alpha$  | 19.8 | -4.6 | 36.0 | 0.0  |
| 12-et  | $\alpha\alpha\alpha\alpha\beta$  | 57.8 | 46.9 | 3.0  | 18.6 |
| 14-et  | $\alpha\alpha\alpha\alpha\alpha$ | 14.9 | -9.3 | 41.8 | 1.1  |

| Spin state | topology | Spin<br>(Mn1~Mn4-<br>O2/O4/O7) | Mulliken spin density |       |         |
|------------|----------|--------------------------------|-----------------------|-------|---------|
|            |          |                                | Rea                   | TS    | Pro-O-O |
|            | $\alpha$ | Mn1                            | 2.92                  | 2.94  | 2.96    |
|            | $\alpha$ | Mn2                            | 2.94                  | 3.56  | 3.86    |
|            | $\beta$  | Mn3                            | -2.90                 | -2.92 | -3.02   |
|            | $\beta$  | Mn4                            | -1.87                 | -2.58 | -2.67   |
|            | $\alpha$ | O2                             | 0.01                  | -0.09 | 0.08    |
|            |          | O4                             | -0.06                 | 0.37  | 0.09    |
|            |          | O10                            | -0.14                 | -0.30 | -0.30   |
| doublet    | $\alpha$ | Mn1                            | 2.93                  | 2.93  | 2.93    |
|            | $\beta$  | Mn2                            | -2.93                 | -3.78 | -1.91   |
|            | $\alpha$ | Mn3                            | 2.88                  | 2.91  | 3.02    |
|            | $\beta$  | Mn4                            | -1.81                 | -1.20 | -2.65   |
|            | $\alpha$ | O2                             | 0.01                  | 0.25  | -0.04   |
|            |          | O4                             | -0.04                 | -0.08 | -0.03   |
|            |          | O10                            | -0.12                 | -0.12 | -0.32   |
|            | $\alpha$ | Mn1                            | 2.92                  | 2.89  | 2.89    |
|            | $\beta$  | Mn2                            | -2.93                 | -3.80 | -3.85   |
|            | $\beta$  | Mn3                            | -2.83                 | -2.91 | -2.98   |
|            | $\alpha$ | Mn4                            | 2.64                  | 3.47  | 3.79    |
|            | $\alpha$ | O2                             | -0.03                 | 0.30  | 0.07    |
|            |          | O4                             | 0.07                  | -0.02 | 0.04    |
| O10        |          | 0.86                           | 0.71                  | 0.82  |         |
| $\beta$    | Mn1      | -2.92                          | -2.91                 | -2.89 |         |
| $\alpha$   | Mn2      | 2.93                           | 3.53                  | 3.86  |         |
| $\alpha$   | Mn3      | 2.90                           | 2.85                  | 2.98  |         |
| $\beta$    | Mn4      | -1.80                          | -2.59                 | -2.65 |         |
| $\alpha$   | O2       | 0.04                           | -0.10                 | -0.07 |         |

|        |          |     |       |       |       |
|--------|----------|-----|-------|-------|-------|
|        |          | O4  | -0.05 | 0.40  | -0.03 |
|        |          | O10 | -0.15 | -0.33 | -0.34 |
|        | $\beta$  | Mn1 | -2.85 | -2.90 | -2.91 |
|        | $\alpha$ | Mn2 | 3.80  | 3.84  | 3.85  |
|        | $\beta$  | Mn3 | -2.85 | -2.92 | -3.01 |
|        | $\alpha$ | Mn4 | 1.82  | 2.25  | 2.64  |
|        | $\alpha$ | O2  | 0.36  | 0.48  | 0.07  |
|        |          | O4  | 0.05  | 0.05  | 0.05  |
|        |          | O10 | 0.13  | 0.23  | 0.33  |
|        | $\beta$  | Mn1 | -2.92 | -2.95 | -2.95 |
|        | $\beta$  | Mn2 | -2.94 | -3.79 | -3.85 |
|        | $\alpha$ | Mn3 | 2.87  | 2.91  | 3.01  |
|        | $\alpha$ | Mn4 | 2.71  | 3.49  | 3.79  |
|        | $\alpha$ | O2  | -0.01 | 0.26  | -0.06 |
|        |          | O4  | 0.20  | -0.05 | -0.07 |
|        |          | O7  | 0.38  | 0.47  | 0.29  |
|        | $\alpha$ | Mn1 | 2.92  | 2.95  | 2.96  |
|        | $\alpha$ | Mn2 | 2.93  | 3.80  | 3.87  |
|        | $\alpha$ | Mn3 | 2.84  | 2.92  | 2.99  |
|        | $\beta$  | Mn4 | -2.64 | -3.49 | -3.79 |
|        | $\beta$  | O2  | 0.06  | -0.27 | -0.06 |
|        |          | O4  | -0.07 | 0.05  | -0.03 |
|        |          | O10 | -0.86 | -0.71 | -0.82 |
|        | $\alpha$ | Mn1 | 2.92  | 2.95  | 2.95  |
|        | $\alpha$ | Mn2 | 2.94  | 3.81  | 3.85  |
|        | $\beta$  | Mn3 | -2.86 | -2.88 | -3.06 |
|        | $\alpha$ | Mn4 | 1.82  | 1.18  | 0.92  |
|        |          | O2  | 0.00  | -0.24 | 0.11  |
|        | $\beta$  | O4  | 0.04  | 0.05  | 0.07  |
|        |          | O10 | 0.09  | 0.13  | 0.11  |
| sextet | $\alpha$ | Mn1 | 2.93  | 2.94  | 2.92  |
|        | $\beta$  | Mn2 | -2.93 | -3.53 | -3.84 |
|        | $\alpha$ | Mn3 | 2.93  | 2.94  | 3.04  |
|        | $\alpha$ | Mn4 | 1.86  | 2.57  | 2.66  |
|        | $\beta$  | O2  | 0.02  | 0.10  | -0.07 |
|        |          | O4  | 0.06  | -0.37 | -0.09 |
|        |          | O10 | 0.14  | 0.30  | 0.30  |
|        | $\beta$  | Mn1 | -2.91 | -2.89 | -2.89 |
|        | $\alpha$ | Mn2 | 2.93  | 3.83  | 3.85  |
|        | $\alpha$ | Mn3 | 2.94  | 2.91  | 3.03  |
|        | $\alpha$ | Mn4 | 1.88  | 1.05  | 0.82  |
|        | $\beta$  | O2  | 0.02  | -0.25 | -0.09 |
|        |          | O4  | 0.05  | 0.04  | -0.07 |
|        |          | O10 | 0.14  | 0.19  | 0.25  |

|          |          |          |       |       |       |      |
|----------|----------|----------|-------|-------|-------|------|
|          | $\alpha$ | Mn1      | 2.93  | 2.96  | 2.98  |      |
|          | $\alpha$ | Mn2      | 2.92  | 3.56  | 3.87  |      |
|          | $\alpha$ | Mn3      | 2.89  | 2.87  | 2.99  |      |
|          | $\beta$  | Mn4      | -1.82 | -2.59 | -2.66 |      |
|          | $\alpha$ | O2       | 0.07  | -0.07 | -0.06 |      |
|          |          | O4       | -0.04 | 0.36  | -0.03 |      |
|          |          | O10      | -0.11 | -0.30 | -0.31 |      |
| octet    | $\alpha$ | Mn1      | 2.92  | 2.94  | 2.95  |      |
|          | $\alpha$ | Mn2      | 3.81  | 3.86  | 3.86  |      |
|          | $\beta$  | Mn3      | -2.80 | -2.91 | -3.00 |      |
|          | $\alpha$ | Mn4      | 1.80  | 2.24  | 2.65  |      |
|          | $\alpha$ | O2       | 0.65  | 0.50  | 0.08  |      |
|          |          | O4       | 0.06  | 0.05  | 0.06  |      |
|          |          | O10      | 0.13  | 0.23  | 0.33  |      |
|          | $\alpha$ | Mn1      | 2.94  | 2.93  | 2.93  |      |
|          | $\beta$  | Mn2      | -2.93 | -2.48 | -1.94 |      |
|          | $\alpha$ | Mn3      | 2.89  | 3.01  | 3.03  |      |
|          | $\alpha$ | Mn4      | 2.71  | 2.83  | 2.84  |      |
|          | $\alpha$ | O2       | 0.02  | 0.03  | -0.04 |      |
|          |          | O4       | 0.19  | 0.33  | -0.05 |      |
|          |          | O10      | 0.83  | 0.01  | 0.01  |      |
|          | $\beta$  | Mn1      | -2.82 | -2.88 | -2.88 |      |
|          | $\alpha$ | Mn2      | 3.83  | 3.84  | 3.86  |      |
|          | $\alpha$ | Mn3      | 2.81  | 2.87  | 3.01  |      |
|          | $\alpha$ | Mn4      | 1.87  | 2.31  | 2.65  |      |
|          | $\alpha$ | O2       | 0.75  | 0.47  | -0.06 |      |
|          |          | O4       | 0.08  | 0.09  | -0.08 |      |
|          |          | O10      | 0.13  | 0.21  | 0.33  |      |
|          |          | O5       | 0.29  | 0.01  | 0.04  |      |
|          | 12-et    | $\alpha$ | Mn1   | 2.92  | 2.97  | 2.98 |
|          |          | $\alpha$ | Mn2   | 2.92  | 3.81  | 3.87 |
| $\alpha$ |          | Mn3      | 2.94  | 2.93  | 3.03  |      |
| $\alpha$ |          | Mn4      | 1.87  | 1.16  | 0.81  |      |
|          |          | O2       | 0.07  | -0.24 | -0.07 |      |
| $\beta$  |          | O4       | 0.04  | 0.07  | -0.06 |      |
|          |          | O10      | 0.16  | 0.12  | 0.25  |      |
| 14-et    | $\alpha$ | Mn1      | 2.94  | 2.96  | 2.98  |      |
|          | $\alpha$ | Mn2      | 3.87  | 3.85  | 3.87  |      |
|          | $\alpha$ | Mn3      | 2.81  | 2.88  | 3.02  |      |
|          | $\alpha$ | Mn4      | 1.86  | 2.30  | 2.65  |      |
|          |          | O2       | 0.79  | 0.47  | -0.05 |      |
|          | $\alpha$ | O4       | 0.08  | 0.13  | -0.07 |      |
|          |          | O10      | 0.12  | 0.21  | 0.33  |      |
|          | O5       | 0.38     | 0.04  | 0.04  |       |      |

**Rea:**

|    |             |             |             |   |             |             |             |
|----|-------------|-------------|-------------|---|-------------|-------------|-------------|
| Ca | -2.44462700 | 0.18356100  | -1.32010800 | H | -2.46218500 | -6.08616800 | -5.06824900 |
| Mn | 0.02104300  | -1.80511000 | -0.26279700 | N | 2.03888900  | -1.99241100 | -0.65312300 |
| Mn | -1.58788500 | -1.04559700 | 1.77519200  | C | 2.74749200  | -1.30746100 | -1.61768500 |
| Mn | 0.06927000  | 0.86911900  | 0.71802200  | H | 2.24934400  | -0.59674000 | -2.26392900 |
| Mn | 0.43612000  | 3.42847200  | -1.27502100 | C | 4.07038100  | -1.67584900 | -1.55177100 |
| O  | -1.73591500 | -1.79898800 | 0.14234800  | N | 4.13773700  | -2.61479600 | -0.52646700 |
| O  | 0.26706400  | -0.94299400 | 1.37135600  | H | 5.00708500  | -2.86778900 | -0.05273400 |
| O  | -1.69645400 | 0.59212600  | 1.03197200  | C | 2.89969500  | -2.75872600 | -0.00151300 |
| O  | -0.00040600 | -0.08567600 | -0.88031800 | H | 2.65063100  | -3.40319100 | 0.82867500  |
| O  | -0.23486200 | 2.47574500  | 0.05738700  | C | 5.25371900  | -1.25523500 | -2.38251200 |
| O  | -4.57667100 | -0.41394000 | -2.53388600 | H | 5.28299700  | -1.82822000 | -3.32180200 |
| H  | -5.04058500 | -0.65926100 | -1.70762900 | H | 5.09949700  | -0.20852600 | -2.67759100 |
| H  | -4.19185500 | -1.24512700 | -2.88040200 | C | 6.64384800  | -1.40908800 | -1.70420500 |
| O  | -1.61930600 | 0.87095400  | -3.61007400 | H | 6.94052500  | -2.46362600 | -1.67884200 |
| H  | -2.22628700 | 1.58564900  | -3.86863000 | H | 7.38894600  | -0.87588300 | -2.31038500 |
| H  | -0.78448200 | 1.35238600  | -3.37940200 | C | 6.64107400  | -0.91903400 | -0.25891500 |
| O  | 1.17781900  | 4.39021400  | -2.69070100 | O | 6.48209500  | -1.70550200 | 0.68221600  |
| H  | 2.13290000  | 4.18136100  | -2.67468300 | N | 6.74161000  | 0.42658200  | -0.07973500 |
| O  | 0.43845000  | 5.06095000  | 0.18346400  | H | 6.82300700  | 1.00749300  | -0.90536500 |
| H  | -0.37648000 | 5.48509400  | -0.15519700 | C | 6.34832400  | 1.07127600  | 1.17716300  |
| H  | 0.13411100  | 4.48408300  | 0.91559400  | H | 6.71182300  | 0.43693400  | 1.99119400  |
| O  | -2.75627000 | 2.56127200  | -1.62548300 | H | 6.87175400  | 2.03427000  | 1.23706400  |
| C  | -2.46727900 | 3.76846800  | -1.68265900 | C | 4.82295500  | 1.25187300  | 1.29302000  |
| O  | -1.27106700 | 4.27113200  | -1.66865200 | H | 4.34394300  | 0.26726700  | 1.25104100  |
| C  | -3.59389300 | 4.79274400  | -1.83727800 | H | 4.59139200  | 1.66958500  | 2.28301400  |
| H  | -3.91674600 | 4.73527400  | -2.88876300 | C | 4.24554800  | 2.15281600  | 0.19825700  |
| H  | -4.44042100 | 4.42254700  | -1.24514800 | H | 4.62536600  | 1.84538800  | -0.78917300 |
| C  | -3.24328000 | 6.23684000  | -1.47482100 | H | 4.55280200  | 3.19937600  | 0.32688600  |
| H  | -2.41136000 | 6.60724500  | -2.08412500 | C | 2.72308900  | 2.13277900  | 0.05211400  |
| H  | -2.95719600 | 6.32392400  | -0.41727600 | O | 2.08335000  | 1.19549200  | 0.59480300  |
| H  | -4.10754700 | 6.89366400  | -1.63583900 | O | 2.26992100  | 3.09039300  | -0.66676800 |
| O  | -0.27299400 | -2.72594200 | -1.92578100 | O | 0.16580200  | -3.54374700 | 0.81098500  |
| C  | -1.34529700 | -2.76492300 | -2.65995400 | C | -0.46861300 | -3.72729800 | 1.90562300  |
| O  | -2.29027900 | -1.95825500 | -2.59299200 | O | -1.20404800 | -2.88707200 | 2.51061700  |
| C  | -1.35449000 | -3.90967800 | -3.66747900 | C | -0.33359700 | -5.11492600 | 2.52488800  |
| H  | -0.43545500 | -3.82207700 | -4.26674400 | H | 0.71638100  | -5.42044500 | 2.42111500  |
| H  | -1.24245700 | -4.84535300 | -3.09842700 | H | -0.90496900 | -5.79630200 | 1.87523200  |
| C  | -2.58914000 | -3.95976200 | -4.57040400 | H | -5.89668700 | -2.29381800 | 2.11088500  |
| H  | -2.68580300 | -3.00268700 | -5.10117900 | C | -0.81095300 | -5.22278400 | 3.97348300  |
| H  | -3.48920800 | -4.05587400 | -3.94657700 | H | -0.69608200 | -6.25231300 | 4.33597800  |
| C  | -2.53031900 | -5.11417200 | -5.57706200 | H | -0.23399600 | -4.56111100 | 4.63112900  |
| H  | -1.65551100 | -5.02457200 | -6.23645900 | H | -1.86465500 | -4.93739300 | 4.06233800  |
| H  | -3.42526900 | -5.13290400 | -6.21254800 | O | -4.33671600 | -0.46684100 | 0.20773800  |



|   |             |             |            |   |             |            |             |
|---|-------------|-------------|------------|---|-------------|------------|-------------|
| C | -4.43187900 | -0.90913500 | 1.37055900 | H | 0.38384300  | 2.35874000 | 4.91188500  |
| O | -3.44216400 | -1.16806900 | 2.16937000 | C | -1.39699500 | 1.50101700 | 5.85315400  |
| C | -5.79314500 | -1.20939400 | 1.97370100 | H | -1.88200600 | 0.51775500 | 5.89231800  |
| H | -6.59105700 | -0.84492000 | 1.32085400 | H | -2.10603100 | 2.17764100 | 5.35286200  |
| H | -5.87420300 | -0.74759700 | 2.96445500 | C | -1.10872600 | 2.00955800 | 7.26943100  |
| O | -1.13430800 | -0.16859500 | 3.51415700 | H | -0.42727200 | 1.33272300 | 7.80396800  |
| C | -0.36966500 | 0.84656500  | 3.60237900 | H | -2.03253400 | 2.08497300 | 7.85754900  |
| O | 0.22111500  | 1.44348500  | 2.64304800 | H | -0.64197600 | 3.00450600 | 7.25234500  |
| C | -0.12150100 | 1.38971700  | 5.00289400 | O | 0.50162000  | 2.20247900 | -2.49734900 |
| H | 0.58485900  | 0.69897400  | 5.49112800 |   |             |            |             |

**TS:**

|    |             |             |             |   |             |             |             |
|----|-------------|-------------|-------------|---|-------------|-------------|-------------|
| Ca | 2.36964900  | 0.31847600  | -1.32238300 | O | 1.96360400  | 2.54927100  | -2.32328300 |
| Mn | -0.30860400 | 1.93239800  | -0.04193100 | C | 0.82996500  | 4.49064900  | -3.21003100 |
| Mn | 1.29970100  | 1.10819700  | 2.04497700  | H | -0.07415400 | 4.36477100  | -3.82519100 |
| Mn | -0.28273600 | -0.79881300 | 0.56130700  | H | 0.61761100  | 5.34933800  | -2.55488700 |
| Mn | 0.41417600  | -3.40938900 | -1.53890000 | C | 2.05297900  | 4.75760400  | -4.09057900 |
| O  | 1.42441700  | 1.92691900  | 0.41252200  | H | 2.25555900  | 3.86941400  | -4.70446000 |
| O  | -0.53484400 | 0.82958800  | 1.44881000  | H | 2.93619100  | 4.89468100  | -3.45040100 |
| O  | 1.53921000  | -0.88990000 | 0.71800100  | C | 1.86886400  | 5.98608800  | -4.98854700 |
| O  | -0.17650900 | 0.28952800  | -0.89085100 | H | 1.01062400  | 5.86169400  | -5.66385800 |
| O  | 0.79702400  | -2.20640800 | -0.02243600 | H | 2.75751800  | 6.16056400  | -5.60885800 |
| O  | 4.45033800  | 1.37849400  | -2.29578400 | H | 1.69305400  | 6.89409800  | -4.39451900 |
| H  | 4.84774700  | 1.52098700  | -1.41278700 | N | -2.35664800 | 1.93626300  | -0.43198400 |
| H  | 3.99122500  | 2.21061800  | -2.52630700 | C | -2.96602600 | 1.50893800  | -1.59063600 |
| O  | 1.84932200  | -0.38393000 | -3.66888400 | H | -2.37965600 | 1.24717600  | -2.46060500 |
| H  | 2.66074900  | -0.88957300 | -3.85545200 | C | -4.32688600 | 1.46789200  | -1.40034400 |
| H  | 1.16735000  | -1.09712900 | -3.54703900 | N | -4.52441900 | 1.89999100  | -0.09330200 |
| O  | 0.00777900  | -4.51996700 | -3.06199400 | H | -5.39502400 | 1.75770200  | 0.42556700  |
| H  | -0.95966300 | -4.46784200 | -3.19180500 | C | -3.31431000 | 2.15034300  | 0.45678600  |
| O  | 0.69584100  | -4.92002100 | -0.01351200 | H | -3.15787000 | 2.45910700  | 1.48011400  |
| H  | 1.64395500  | -5.04881500 | -0.23657600 | C | -5.43566900 | 1.07845900  | -2.34312400 |
| H  | 0.70107600  | -4.31643200 | 0.75800800  | H | -5.60170000 | 1.87642400  | -3.08252900 |
| O  | 3.40160600  | -1.81463400 | -1.77534400 | H | -5.09879900 | 0.20537000  | -2.91916500 |
| C  | 3.43345000  | -3.06123200 | -1.72382300 | C | -6.80793500 | 0.76879900  | -1.68932400 |
| O  | 2.40148700  | -3.83061300 | -1.65552300 | H | -7.27113300 | 1.69235600  | -1.32390300 |
| C  | 4.79492800  | -3.75777100 | -1.78097900 | H | -7.47221200 | 0.35495000  | -2.46035300 |
| H  | 5.18125300  | -3.58701100 | -2.79775900 | C | -6.70518300 | -0.16891700 | -0.48875900 |
| H  | 5.46617700  | -3.19868800 | -1.11537300 | O | -6.65763300 | 0.27223500  | 0.66700100  |
| C  | 4.79836300  | -5.25157000 | -1.45488200 | N | -6.60696700 | -1.49704800 | -0.76095100 |
| H  | 4.13103000  | -5.80428200 | -2.12572900 | H | -6.62194800 | -1.79362200 | -1.72887800 |
| H  | 4.46698400  | -5.43579500 | -0.42386900 | C | -6.23285800 | -2.47211200 | 0.26807600  |
| H  | 5.80998000  | -5.66540300 | -1.55586800 | H | -6.80310400 | -2.22933900 | 1.17069300  |
| O  | -0.11684900 | 3.03651100  | -1.59889000 | H | -6.55597900 | -3.46092500 | -0.08136900 |
| C  | 0.94123200  | 3.25872600  | -2.31880900 | C | -4.72800200 | -2.45494700 | 0.58882000  |

|   |             |             |             |   |             |             |             |
|---|-------------|-------------|-------------|---|-------------|-------------|-------------|
| H | -4.45153200 | -1.45060600 | 0.92737700  | C | 4.17195500  | 1.19428100  | 1.61439600  |
| H | -4.54566900 | -3.13737000 | 1.43167000  | O | 3.16462600  | 1.19536200  | 2.43266800  |
| C | -3.84914100 | -2.85541600 | -0.60307600 | C | 5.49141400  | 1.57419100  | 2.26290800  |
| H | -4.14254900 | -2.27083300 | -1.49041300 | H | 6.31924300  | 1.44243200  | 1.56086600  |
| H | -3.96793200 | -3.91484700 | -0.85990100 | H | 5.65609400  | 0.96296600  | 3.15802700  |
| C | -2.35986000 | -2.57493000 | -0.42196500 | O | 0.91629800  | -0.17986800 | 3.50133900  |
| O | -2.06349900 | -1.47779300 | 0.16046500  | C | 0.14813900  | -1.19638100 | 3.44308900  |
| O | -1.55324900 | -3.42223300 | -0.89095100 | O | -0.43220700 | -1.64865100 | 2.40449500  |
| O | -0.66025600 | 3.51541000  | 1.11710700  | C | -0.10253500 | -1.93121300 | 4.75162500  |
| C | -0.12791500 | 3.72799800  | 2.27063800  | H | -0.77591300 | -1.29586700 | 5.34909400  |
| O | 0.61259600  | 2.93633100  | 2.90916000  | H | -0.64181900 | -2.85994000 | 4.53031000  |
| C | -0.44891800 | 5.09183300  | 2.87652600  | C | 1.18066700  | -2.20647100 | 5.55305300  |
| H | -1.52795400 | 5.26082000  | 2.75555200  | H | 1.69881400  | -1.25510900 | 5.72631500  |
| H | 0.03761400  | 5.83994700  | 2.23193600  | H | 1.85964600  | -2.82502200 | 4.94690300  |
| H | 5.44645900  | 2.62134400  | 2.58969900  | C | 0.89419100  | -2.90741000 | 6.88495500  |
| C | -0.01245600 | 5.26003100  | 4.33171200  | H | 0.24411800  | -2.29428800 | 7.52486500  |
| H | -0.26170300 | 6.26673400  | 4.69097500  | H | 1.82294200  | -3.09761500 | 7.43816500  |
| H | -0.51025500 | 4.53039800  | 4.98192400  | H | 0.39320900  | -3.87351400 | 6.73145200  |
| H | 1.06767400  | 5.11053700  | 4.43796700  | O | 0.12290200  | -2.28786900 | -2.82710000 |
| O | 4.11821600  | 0.91435100  | 0.40037600  |   |             |             |             |

**Pro:**

|    |             |             |             |   |             |             |             |
|----|-------------|-------------|-------------|---|-------------|-------------|-------------|
| Ca | 2.42036100  | 0.38617100  | -1.34572200 | O | 2.63527300  | -3.69765200 | -1.73238900 |
| Mn | -0.35323600 | 1.84976200  | -0.03839100 | C | 5.03561000  | -3.51898600 | -1.63235900 |
| Mn | 1.26333500  | 1.18968000  | 2.10451600  | H | 5.55673800  | -3.28339200 | -2.57252900 |
| Mn | -0.30028400 | -0.87252000 | 0.58896300  | H | 5.56894700  | -2.95136200 | -0.85684400 |
| Mn | 0.48306000  | -3.32625000 | -1.75800500 | C | 5.08182400  | -5.02096600 | -1.35203800 |
| O  | 1.38336300  | 1.88451600  | 0.41225400  | H | 4.54974100  | -5.58477300 | -2.12710900 |
| O  | -0.51788200 | 0.76534000  | 1.47782100  | H | 4.61731300  | -5.26089800 | -0.38629900 |
| O  | 1.56432600  | -1.23589400 | 0.46974400  | H | 6.11984300  | -5.37688900 | -1.31913300 |
| O  | -0.19415500 | 0.20435900  | -0.86383400 | O | -0.20988300 | 2.93407200  | -1.61027900 |
| O  | 0.74918000  | -2.33069300 | 0.04514600  | C | 0.84417900  | 3.24529300  | -2.30478200 |
| O  | 4.46708200  | 1.58977500  | -2.19092400 | O | 1.91876400  | 2.61967000  | -2.28545800 |
| H  | 4.84167600  | 1.71148400  | -1.29583700 | C | 0.65404200  | 4.46712600  | -3.19551500 |
| H  | 3.99234000  | 2.41574500  | -2.40864700 | H | -0.21953000 | 4.26795500  | -3.83496900 |
| O  | 1.87104200  | -0.27985900 | -3.68105900 | H | 0.35291000  | 5.30245900  | -2.54494000 |
| H  | 2.61793600  | -0.90065200 | -3.77617000 | C | 1.87382900  | 4.83768700  | -4.04250700 |
| H  | 1.09313500  | -0.88951400 | -3.55934600 | H | 2.16517200  | 3.97164200  | -4.65209600 |
| O  | 0.05038700  | -4.18687800 | -3.32508000 | H | 2.72539900  | 5.04463200  | -3.37864200 |
| H  | -0.92197100 | -4.20258600 | -3.41325500 | C | 1.61218700  | 6.05036600  | -4.94264000 |
| O  | 0.83352500  | -5.06716800 | -0.53354000 | H | 0.78555000  | 5.85793300  | -5.64097000 |
| H  | 1.80939700  | -5.01122000 | -0.67470000 | H | 2.49946200  | 6.30016800  | -5.53861300 |
| H  | 0.67279300  | -4.72480700 | 0.36680500  | H | 1.34607600  | 6.93838300  | -4.35193000 |
| O  | 3.55856000  | -1.65762300 | -1.88134500 | N | -2.39951500 | 1.79393300  | -0.41418300 |
| C  | 3.63917500  | -2.90546100 | -1.75011700 | C | -2.99837800 | 1.31476400  | -1.55842500 |

|   |             |             |             |   |             |             |             |
|---|-------------|-------------|-------------|---|-------------|-------------|-------------|
| H | -2.40325700 | 1.00616200  | -2.40688500 | O | 0.51062400  | 2.99862300  | 2.90263600  |
| C | -4.36114800 | 1.29013200  | -1.38072200 | C | -0.63037300 | 5.11005500  | 2.77736700  |
| N | -4.57023800 | 1.78294500  | -0.09703500 | H | -1.70873300 | 5.24452500  | 2.61559000  |
| H | -5.44634300 | 1.66493400  | 0.41908700  | H | -0.14286800 | 5.85138300  | 2.12552700  |
| C | -3.36526700 | 2.05336000  | 0.45380500  | H | 5.40098800  | 2.77252100  | 2.56499900  |
| H | -3.21914700 | 2.41270500  | 1.46189200  | C | -0.24655400 | 5.33589900  | 4.23967400  |
| C | -5.46334900 | 0.86702600  | -2.31665500 | H | -0.53470000 | 6.34595400  | 4.55772300  |
| H | -5.61992500 | 1.63563800  | -3.08848700 | H | -0.74604600 | 4.61389800  | 4.89713200  |
| H | -5.12440500 | -0.02919500 | -2.85462400 | H | 0.83310600  | 5.22040100  | 4.38512300  |
| C | -6.84161700 | 0.58841900  | -1.66118700 | O | 4.07717200  | 0.93793600  | 0.47165700  |
| H | -7.30592300 | 1.52737500  | -1.33902200 | C | 4.13347900  | 1.28872200  | 1.66737000  |
| H | -7.50081700 | 0.14267200  | -2.41862800 | O | 3.12737000  | 1.33078900  | 2.48545800  |
| C | -6.74638200 | -0.29773800 | -0.42139500 | C | 5.45254100  | 1.71118400  | 2.28889100  |
| O | -6.70998400 | 0.19218600  | 0.71515900  | H | 6.27853200  | 1.55051800  | 1.59076900  |
| N | -6.63904800 | -1.63482500 | -0.63884800 | H | 5.62612600  | 1.14569200  | 3.21200500  |
| H | -6.63407300 | -1.96645900 | -1.59555600 | O | 0.99649000  | -0.17163500 | 3.50993200  |
| C | -6.24303800 | -2.56397100 | 0.42424200  | C | 0.26335000  | -1.21651600 | 3.47072300  |
| H | -6.81007400 | -2.29451300 | 1.32125800  | O | -0.31556000 | -1.69257700 | 2.44519200  |
| H | -6.55519000 | -3.56960100 | 0.11506700  | C | 0.07252700  | -1.95719900 | 4.78480700  |
| C | -4.73540700 | -2.51540400 | 0.72930200  | H | -0.56260300 | -1.32106800 | 5.42152300  |
| H | -4.47210800 | -1.50158000 | 1.04983900  | H | -0.48103200 | -2.88203000 | 4.58505400  |
| H | -4.53441000 | -3.18154400 | 1.58109300  | C | 1.39605400  | -2.24555700 | 5.51455100  |
| C | -3.86115200 | -2.91909400 | -0.46510100 | H | 1.92690100  | -1.29790600 | 5.66964700  |
| H | -4.15286600 | -2.32814500 | -1.34854300 | H | 2.03821600  | -2.86175500 | 4.86741300  |
| H | -3.99092900 | -3.97704300 | -0.72412500 | C | 1.17660300  | -2.95788100 | 6.85308700  |
| C | -2.36516300 | -2.66281600 | -0.28921200 | H | 0.56385600  | -2.34829800 | 7.53194000  |
| O | -2.07394700 | -1.53933900 | 0.28577300  | H | 2.13241300  | -3.15697800 | 7.35458000  |
| O | -1.55290100 | -3.50096500 | -0.72818000 | H | 0.66417400  | -3.92045300 | 6.71677000  |
| O | -0.75422100 | 3.46111000  | 1.07543500  | O | -0.02934700 | -1.95328300 | -2.77228100 |
| C | -0.25115000 | 3.73903000  | 2.22553300  |   |             |             |             |

### W1 (hydroxyl)-O4 (oxo)

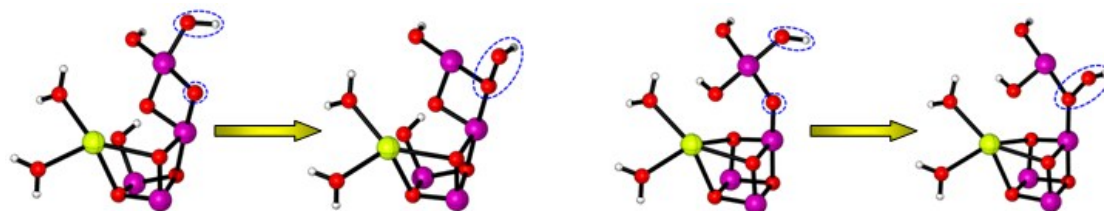

**Fig. S9** Pictorial exhibitions for W1 (hydroxyl)-O4 (oxo) nucleophilic attack in the open (left) and closed-cubane (right) structures.

**Table S20** Reaction parameters for the open-cubane W1 (hydroxyl)-O4 (oxo) nucleophilic attack:

| Spin state | Spin | Gibbs Free energy (a.u.) |
|------------|------|--------------------------|
|------------|------|--------------------------|

| topology<br>(Mn1~Mn4-O4/O5/O6) |                                  | Rea        | TS         | Pro        |
|--------------------------------|----------------------------------|------------|------------|------------|
| doublet                        | $\alpha\alpha\beta\beta$         | \          | \          | \          |
|                                | $\alpha\beta\alpha\beta$         | -3366.2122 | -3366.1888 | -3366.2154 |
|                                | $\alpha\beta\beta\alpha$         | \          | \          | \          |
|                                | $\beta\alpha\alpha\beta$         | -3366.2146 | -3366.1883 | -3366.2155 |
|                                | $\beta\alpha\beta\alpha$         | \          | \          | \          |
|                                | $\beta\beta\alpha\alpha$         | -3366.2133 | -3366.1881 | -3366.2132 |
| sextet                         | $\alpha\alpha\alpha\beta\beta$   | \          | \          | \          |
|                                | $\alpha\alpha\beta\alpha\beta$   | -3366.2143 | -3366.1919 | -3366.2154 |
|                                | $\alpha\beta\alpha\alpha\beta$   | \          | \          | \          |
|                                | $\beta\alpha\alpha\alpha\beta$   | \          | \          | \          |
| octet                          | $\alpha\alpha\alpha\beta\alpha$  | -3366.2178 | -3366.1885 | -3366.2204 |
|                                | $\alpha\alpha\beta\alpha\alpha$  | \          | \          | \          |
|                                | $\alpha\beta\alpha\alpha\alpha$  | -3366.2132 | -3366.1880 | -3366.2154 |
|                                | $\beta\alpha\alpha\alpha\alpha$  | -3366.2146 | -3366.1900 | -3366.2157 |
| 12-et                          | $\alpha\alpha\alpha\alpha\beta$  | \          | \          | \          |
| 14-et                          | $\alpha\alpha\alpha\alpha\alpha$ | -3366.2137 | -3366.1899 | -3366.2231 |

| Spin state | Spin topology<br>(Mn1~Mn4-O4/O10) | Relative Gibbs Free energy (kcal/mol) |                            |                        |                        |
|------------|-----------------------------------|---------------------------------------|----------------------------|------------------------|------------------------|
|            |                                   | $\Delta G^\ddagger(\text{Rea-TS})$    | $\Delta G(\text{Rea-Pro})$ | $\Delta G(\text{Rea})$ | $\Delta G(\text{Pro})$ |
| doublet    | $\alpha\alpha\beta\beta\alpha$    | \                                     | \                          | \                      | \                      |
|            | $\alpha\beta\alpha\beta\alpha$    | 14.7                                  | -2.0                       | 3.5                    | 4.8                    |
|            | $\alpha\beta\beta\alpha\alpha$    | \                                     | \                          | \                      | \                      |
|            | $\beta\alpha\alpha\beta\alpha$    | 16.5                                  | -0.6                       | 2.0                    | 4.8                    |
|            | $\beta\alpha\beta\alpha\alpha$    | \                                     | \                          | \                      | \                      |
|            | $\beta\beta\alpha\alpha\alpha$    | 15.8                                  | 0.1                        | 2.8                    | 6.2                    |
| sextet     | $\alpha\alpha\alpha\beta\beta$    | \                                     | \                          | \                      | \                      |
|            | $\alpha\alpha\beta\alpha\beta$    | 14.1                                  | -0.7                       | 2.2                    | 4.8                    |
|            | $\alpha\beta\alpha\alpha\beta$    | \                                     | \                          | \                      | \                      |
|            | $\beta\alpha\alpha\alpha\beta$    | \                                     | \                          | \                      | \                      |
| octet      | $\alpha\alpha\alpha\beta\alpha$   | 18.4                                  | -1.6                       | 0.0                    | 1.7                    |
|            | $\alpha\alpha\beta\alpha\alpha$   | \                                     | \                          | \                      | \                      |
|            | $\alpha\beta\alpha\alpha\alpha$   | 15.8                                  | -1.4                       | 2.9                    | 4.8                    |
|            | $\beta\alpha\alpha\alpha\alpha$   | 15.4                                  | -0.7                       | 2.0                    | 4.6                    |
| 12-et      | $\alpha\alpha\alpha\alpha\beta$   | \                                     | \                          | \                      | \                      |
| 14-et      | $\alpha\alpha\alpha\alpha\alpha$  | 14.9                                  | -2.9                       | 2.6                    | 0.0                    |

| Spin state | Spin topology<br>(Mn1~Mn4-O4/O5/O6) | Mulliken spin density |    |     |
|------------|-------------------------------------|-----------------------|----|-----|
|            |                                     | Rea                   | TS | Pro |
| doublet    | $\alpha$ Mn1                        | \                     | \  | \   |
|            | $\alpha$ Mn2                        | \                     | \  | \   |

|        |          |     |       |       |       |
|--------|----------|-----|-------|-------|-------|
|        | $\beta$  | Mn3 | \     | \     | \     |
|        | $\beta$  | Mn4 | \     | \     | \     |
|        |          | O4  | \     | \     | \     |
|        | $\alpha$ | O6  | \     | \     | \     |
|        |          | O5  | \     | \     | \     |
|        | $\alpha$ | Mn1 | 2.94  | 2.95  | 2.95  |
|        | $\beta$  | Mn2 | -2.91 | -2.91 | -2.91 |
|        | $\alpha$ | Mn3 | 2.87  | 3.41  | 3.82  |
|        | $\beta$  | Mn4 | -2.43 | -2.88 | -2.81 |
|        |          | O4  | 0.29  | 0.06  | 0.00  |
|        | $\alpha$ | O6  | 0.07  | 0.45  | 0.01  |
|        |          | O5  | 0.07  | -0.10 | -0.12 |
|        | $\alpha$ | Mn1 | \     | \     | \     |
|        | $\beta$  | Mn2 | \     | \     | \     |
|        | $\beta$  | Mn3 | \     | \     | \     |
|        | $\alpha$ | Mn4 | \     | \     | \     |
|        |          | O4  | \     | \     | \     |
|        | $\alpha$ | O6  | \     | \     | \     |
|        |          | O5  | \     | \     | \     |
|        | $\beta$  | Mn1 | -2.93 | -2.92 | -2.90 |
|        | $\alpha$ | Mn2 | 2.93  | 2.93  | 2.94  |
|        | $\alpha$ | Mn3 | 2.86  | 3.41  | 3.83  |
|        | $\beta$  | Mn4 | -2.62 | -2.88 | -2.81 |
|        |          | O4  | 0.42  | 0.06  | 0.00  |
|        | $\alpha$ | O6  | 0.03  | 0.46  | 0.01  |
|        |          | O5  | 0.16  | -0.10 | -0.12 |
|        | $\beta$  | Mn1 | \     | \     | \     |
|        | $\alpha$ | Mn2 | \     | \     | \     |
|        | $\beta$  | Mn3 | \     | \     | \     |
|        | $\alpha$ | Mn4 | \     | \     | \     |
|        |          | O4  | \     | \     | \     |
|        | $\alpha$ | O6  | \     | \     | \     |
|        |          | O5  | \     | \     | \     |
|        | $\beta$  | Mn1 | -2.96 | -2.94 | -2.92 |
|        | $\beta$  | Mn2 | -2.95 | -2.93 | -2.93 |
|        | $\alpha$ | Mn3 | 2.82  | 3.41  | 3.85  |
|        | $\alpha$ | Mn4 | 2.86  | 2.86  | 2.89  |
|        |          | O4  | 0.62  | 0.09  | 0.00  |
|        | $\alpha$ | O6  | 0.08  | 0.48  | 0.00  |
|        |          | O5  | 0.46  | 0.05  | 0.12  |
| sextet | $\alpha$ | Mn1 | \     | \     | \     |
|        | $\alpha$ | Mn2 | \     | \     | \     |
|        | $\alpha$ | Mn3 | \     | \     | \     |
|        | $\beta$  | Mn4 | \     | \     | \     |

|  |          |     |       |       |       |
|--|----------|-----|-------|-------|-------|
|  |          | O4  | \     | \     | \     |
|  | $\beta$  | O6  | \     | \     | \     |
|  |          | O5  | \     | \     | \     |
|  | $\alpha$ | Mn1 | 2.95  | 2.94  | 2.92  |
|  | $\alpha$ | Mn2 | 2.94  | 2.94  | 2.94  |
|  | $\beta$  | Mn3 | -2.85 | -3.39 | -3.80 |
|  | $\alpha$ | Mn4 | 2.53  | 2.89  | 2.81  |
|  |          | O4  | -0.34 | -0.06 | 0.00  |
|  | $\beta$  | O6  | -0.05 | -0.46 | -0.01 |
|  |          | O5  | -0.11 | 0.10  | 0.12  |
|  | $\alpha$ | Mn1 | \     | \     | \     |
|  | $\beta$  | Mn2 | \     | \     | \     |
|  | $\alpha$ | Mn3 | \     | \     | \     |
|  | $\alpha$ | Mn4 | \     | \     | \     |
|  |          | O4  | \     | \     | \     |
|  | $\beta$  | O6  | \     | \     | \     |
|  |          | O5  | \     | \     | \     |
|  | $\beta$  | Mn1 | \     | \     | \     |
|  | $\alpha$ | Mn2 | \     | \     | \     |
|  | $\alpha$ | Mn3 | \     | \     | \     |
|  | $\alpha$ | Mn4 | \     | \     | \     |
|  |          | O4  | \     | \     | \     |
|  | $\beta$  | O6  | \     | \     | \     |
|  |          | O5  | \     | \     | \     |
|  | $\alpha$ | Mn1 | 2.96  | 2.97  | 2.97  |
|  | $\alpha$ | Mn2 | 2.95  | 2.96  | 2.96  |
|  | $\alpha$ | Mn3 | 2.87  | 3.43  | 3.85  |
|  | $\beta$  | Mn4 | -2.86 | -2.88 | -2.81 |
|  |          | O4  | 0.88  | 0.06  | 0.00  |
|  | $\alpha$ | O6  | -0.05 | 0.46  | 0.01  |
|  |          | O5  | 0.04  | -0.10 | -0.12 |
|  | $\alpha$ | Mn1 | \     | \     | \     |
|  | $\alpha$ | Mn2 | \     | \     | \     |
|  | $\beta$  | Mn3 | \     | \     | \     |
|  | $\alpha$ | Mn4 | \     | \     | \     |
|  |          | O4  | \     | \     | \     |
|  | $\alpha$ | O6  | \     | \     | \     |
|  |          | O5  | \     | \     | \     |
|  | $\alpha$ | Mn1 | 2.94  | 2.95  | 2.95  |
|  | $\beta$  | Mn2 | -2.91 | -2.90 | -2.91 |
|  | $\alpha$ | Mn3 | 2.84  | 3.43  | 3.87  |
|  | $\alpha$ | Mn4 | 2.86  | 2.87  | 2.90  |
|  |          | O4  | 0.65  | 0.09  | 0.00  |
|  | $\alpha$ | O6  | 0.08  | 0.48  | 0.01  |

octet

|       |          |     |       |       |       |
|-------|----------|-----|-------|-------|-------|
|       |          | O5  | 0.45  | 0.05  | 0.12  |
|       | $\beta$  | Mn1 | -2.93 | -2.92 | -2.90 |
|       | $\alpha$ | Mn2 | 2.92  | 2.93  | 2.94  |
|       | $\alpha$ | Mn3 | 2.85  | 3.43  | 3.87  |
|       | $\alpha$ | Mn4 | 2.86  | 2.87  | 2.89  |
|       |          | O4  | 0.62  | 0.09  | 0.00  |
|       | $\alpha$ | O6  | 0.08  | 0.49  | 0.00  |
|       |          | O5  | 0.46  | 0.05  | 0.12  |
| 12-et | $\alpha$ | Mn1 | \     | \     | \     |
|       | $\alpha$ | Mn2 | \     | \     | \     |
|       | $\alpha$ | Mn3 | \     | \     | \     |
|       | $\alpha$ | Mn4 | \     | \     | \     |
|       |          | O4  | \     | \     | \     |
|       | $\beta$  | O6  | \     | \     | \     |
|       |          | O5  | \     | \     | \     |
| 14-et | $\alpha$ | Mn1 | 2.97  | 2.97  | 2.97  |
|       | $\alpha$ | Mn2 | 2.95  | 2.96  | 2.97  |
|       | $\alpha$ | Mn3 | 2.88  | 3.45  | 3.89  |
|       | $\alpha$ | Mn4 | 2.86  | 2.87  | 2.90  |
|       |          | O4  | 0.66  | 0.09  | 0.00  |
|       | $\alpha$ | O6  | 0.08  | 0.50  | 0.01  |
|       |          | O5  | 0.45  | 0.04  | 0.10  |

'\' denotes TSs for some spin states do not exist due to the failure of IRC verification on reactants concerning W1 returning back to Mn4.

**Rea:**

|    |             |             |             |   |             |             |             |
|----|-------------|-------------|-------------|---|-------------|-------------|-------------|
| Ca | 2.55662900  | -0.04542100 | -1.15682300 | H | -1.43421900 | -4.91285500 | -2.27587600 |
| Mn | -0.00847500 | 1.91641400  | -0.16955800 | O | 3.16045100  | -2.31852300 | -1.49046500 |
| Mn | 1.23741600  | 0.49273400  | 1.89320100  | C | 2.94593800  | -3.53575800 | -1.44852200 |
| Mn | -0.18941400 | -1.49204700 | 0.58136200  | O | 1.78604500  | -4.11873800 | -1.54437000 |
| Mn | 0.03704300  | -3.36999900 | -1.54897400 | C | 4.08631000  | -4.53767400 | -1.27389700 |
| O  | 1.62667300  | 1.55531100  | 0.47785500  | H | 3.93065500  | -5.01864500 | -0.29668900 |
| O  | -0.45080400 | 0.40538700  | 0.96247900  | H | 3.95144700  | -5.33394200 | -2.01846300 |
| O  | 1.49976100  | -1.07429200 | 1.04785600  | C | 5.47587300  | -3.90722900 | -1.36198000 |
| O  | 0.20849300  | -1.48773700 | -1.16502800 | H | 5.60282200  | -3.12684800 | -0.60343200 |
| O  | 0.07223000  | -3.30071100 | 0.19963300  | H | 5.64050100  | -3.44235200 | -2.34156800 |
| O  | 4.24756400  | 0.60381500  | -2.93152500 | H | 6.24942800  | -4.67085900 | -1.20962800 |
| H  | 4.01718900  | 1.55563300  | -2.91441200 | O | 0.63227800  | 3.42494200  | -1.13953000 |
| H  | 3.66714600  | 0.23748800  | -3.63116100 | C | 1.73710400  | 3.44615600  | -1.83419000 |
| O  | 1.73115000  | -0.39285100 | -3.56593700 | O | 2.50442200  | 2.48559500  | -2.01237400 |
| H  | 1.01403300  | 0.26393800  | -3.46147100 | C | 2.02752100  | 4.81925500  | -2.43666900 |
| H  | 1.27310200  | -1.28004200 | -3.52383200 | H | 1.12593000  | 5.14255100  | -2.97789100 |
| O  | 0.34863200  | -2.72799600 | -3.28119000 | H | 2.13119000  | 5.52384700  | -1.59706000 |
| H  | 0.66723600  | -3.51021400 | -3.77211600 | C | 3.26080000  | 4.87055000  | -3.34179500 |
| O  | -0.46215600 | -4.96657900 | -2.16882300 | H | 3.13766100  | 4.15020200  | -4.16328900 |

|   |             |             |             |   |             |             |             |
|---|-------------|-------------|-------------|---|-------------|-------------|-------------|
| H | 4.13969300  | 4.53795100  | -2.77269300 | O | -1.96203100 | -3.05336800 | -1.63128600 |
| C | 3.50797500  | 6.27151500  | -3.91238800 | O | -0.40659100 | 3.16923300  | 1.34454300  |
| H | 2.65393600  | 6.61603800  | -4.51243900 | C | 0.10555800  | 3.09854200  | 2.51267500  |
| H | 3.66664900  | 7.00656100  | -3.11086700 | O | 0.76970800  | 2.12636200  | 2.96776500  |
| H | 4.39592400  | 6.28553500  | -4.55750600 | C | -0.10907700 | 4.30958800  | 3.41096500  |
| N | -2.02117600 | 2.24775600  | -0.64174400 | H | -1.15252100 | 4.63007300  | 3.28673500  |
| C | -2.64682000 | 2.00046600  | -1.84560900 | H | 0.50008300  | 5.11863600  | 2.97882300  |
| H | -2.06640800 | 1.75103300  | -2.72268900 | C | 0.24410300  | 4.08879800  | 4.88194000  |
| C | -4.00766900 | 2.11712900  | -1.68634100 | H | 0.08346200  | 5.01206500  | 5.45278700  |
| N | -4.18730700 | 2.45996900  | -0.35134900 | H | -0.37507500 | 3.29926000  | 5.32481400  |
| H | -5.08627800 | 2.40072900  | 0.13617500  | H | 1.29114000  | 3.78742700  | 4.99389400  |
| C | -2.97458500 | 2.50950100  | 0.24177700  | O | 4.16445200  | 0.20900400  | 0.65357200  |
| H | -2.81181300 | 2.71236300  | 1.28928700  | C | 4.09835700  | 0.40436100  | 1.87709500  |
| C | -5.12997400 | 1.94770400  | -2.67761700 | O | 3.00191300  | 0.54847200  | 2.57163500  |
| H | -5.16440600 | 2.80967000  | -3.36075400 | C | 5.35728900  | 0.49300900  | 2.72155900  |
| H | -4.89717700 | 1.07831400  | -3.30834600 | H | 5.35855400  | -0.31645000 | 3.46255300  |
| C | -6.54969200 | 1.78345800  | -2.07448400 | H | 5.36938600  | 1.44021100  | 3.27444700  |
| H | -6.89738500 | 2.73563300  | -1.65813400 | H | 6.24335400  | 0.41606800  | 2.08608500  |
| H | -7.23950600 | 1.51209900  | -2.88529700 | O | 0.57894900  | -0.45694400 | 3.51459400  |
| C | -6.61016600 | 0.76651200  | -0.93614300 | C | -0.20829300 | -1.45312200 | 3.48978600  |
| O | -6.55174500 | 1.12640200  | 0.24737600  | O | -0.71532700 | -1.96674600 | 2.44318700  |
| N | -6.66668700 | -0.54283400 | -1.29184200 | C | -0.56333100 | -2.10808100 | 4.81562300  |
| H | -6.68788000 | -0.77601500 | -2.27689800 | H | -1.56155000 | -2.55235400 | 4.71031800  |
| C | -6.47650300 | -1.62251100 | -0.31724400 | H | 0.13540100  | -2.95285700 | 4.93452500  |
| H | -7.05277900 | -1.36146400 | 0.57640700  | C | -0.48154300 | -1.18373300 | 6.03597800  |
| H | -6.91324400 | -2.53247000 | -0.74806500 | H | -1.17473800 | -0.34077000 | 5.89797000  |
| C | -5.00210500 | -1.84013400 | 0.06537400  | H | 0.52360400  | -0.74707600 | 6.08791500  |
| H | -4.61212700 | -0.92526200 | 0.52448000  | C | -0.81049100 | -1.91753300 | 7.34059600  |
| H | -4.95834200 | -2.62123300 | 0.83757000  | H | -1.82443400 | -2.34140700 | 7.31928200  |
| C | -4.12519900 | -2.23576800 | -1.12592200 | H | -0.75087900 | -1.23898700 | 8.20136800  |
| H | -4.21877800 | -1.48661600 | -1.92849200 | H | -0.10976300 | -2.74520300 | 7.51963500  |
| H | -4.43634400 | -3.19489200 | -1.56051200 | O | 0.12285100  | 0.97143300  | -1.72212500 |
| C | -2.63068300 | -2.32269200 | -0.82633200 | H | -0.25166100 | 0.06098400  | -1.59466000 |
| O | -2.17404300 | -1.65556000 | 0.14140100  |   |             |             |             |

**TS:**

|    |             |             |             |   |            |             |             |
|----|-------------|-------------|-------------|---|------------|-------------|-------------|
| Ca | 2.48225900  | 0.14855500  | -1.19775600 | O | 0.13502900 | -3.51741400 | -0.04275600 |
| Mn | -0.10102500 | 1.95464300  | 0.03272500  | O | 3.97163300 | 0.91382300  | -3.09818600 |
| Mn | 1.20461100  | 0.41803000  | 1.93101100  | H | 3.72844400 | 1.85839900  | -3.00471500 |
| Mn | -0.13473500 | -1.61685000 | 0.52553500  | H | 3.33857500 | 0.57308900  | -3.76484900 |
| Mn | 0.25349400  | -3.08083700 | -1.85772000 | O | 1.45539400 | -0.12859700 | -3.66908000 |
| O  | 1.56520600  | 1.58396600  | 0.59580000  | H | 0.74476300 | 0.47800600  | -3.37486700 |
| O  | -0.47553300 | 0.40652700  | 1.05241800  | H | 1.02288200 | -1.02106300 | -3.73571300 |
| O  | 1.51278700  | -1.10871800 | 1.01000600  | O | 0.29093500 | -2.74112900 | -3.67239800 |
| O  | 0.39655700  | -1.43092200 | -1.28173200 | H | 1.04133800 | -3.23885100 | -4.04714400 |



|   |             |             |             |   |             |             |             |
|---|-------------|-------------|-------------|---|-------------|-------------|-------------|
| O | -0.18900900 | -4.98323800 | -0.94759700 | H | -6.99181200 | -1.84060500 | 0.18570500  |
| H | -1.16254300 | -4.94305200 | -0.84006500 | H | -6.73459500 | -2.74737600 | -1.31651700 |
| O | 3.39766600  | -2.01719000 | -1.65648200 | C | -4.90132400 | -2.11578600 | -0.30262900 |
| C | 3.17866700  | -3.22330600 | -1.80028500 | H | -4.58116900 | -1.27653400 | 0.32392100  |
| O | 2.00351800  | -3.76011000 | -2.00465300 | H | -4.84909300 | -3.01552700 | 0.32748700  |
| C | 4.30195400  | -4.25250400 | -1.75552400 | C | -3.95251500 | -2.26010000 | -1.49695900 |
| H | 4.12164000  | -4.86904400 | -0.86200800 | H | -4.04518800 | -1.38210000 | -2.15645400 |
| H | 4.17282000  | -4.93115900 | -2.61011600 | H | -4.19335400 | -3.13716200 | -2.11148000 |
| C | 5.69955900  | -3.63469200 | -1.72716200 | C | -2.47517100 | -2.33617000 | -1.12774600 |
| H | 5.81799500  | -2.97314400 | -0.86203000 | O | -2.08558700 | -1.74762900 | -0.08196000 |
| H | 5.88744700  | -3.03540800 | -2.62615800 | O | -1.73694800 | -2.98060100 | -1.95034600 |
| H | 6.46218000  | -4.42194800 | -1.67228300 | O | -0.46045400 | 3.11633100  | 1.61454200  |
| O | 0.47820100  | 3.53606900  | -0.89833600 | C | 0.07182700  | 2.95866300  | 2.76518400  |
| C | 1.55192400  | 3.62155600  | -1.62666500 | O | 0.75274900  | 1.96113000  | 3.13377200  |
| O | 2.33593600  | 2.68822600  | -1.88154100 | C | -0.13615100 | 4.09529100  | 3.75725700  |
| C | 1.79841100  | 5.02860600  | -2.16818100 | H | -1.17536800 | 4.43549800  | 3.65437200  |
| H | 0.86535100  | 5.37339100  | -2.63788400 | H | 0.48450800  | 4.92956400  | 3.39487500  |
| H | 1.94504800  | 5.68548300  | -1.29662800 | C | 0.20882500  | 3.75254800  | 5.20681500  |
| C | 2.97822500  | 5.14599300  | -3.13613700 | H | 0.05720600  | 4.62878100  | 5.84973200  |
| H | 2.81422000  | 4.47404600  | -3.99113700 | H | -0.42199700 | 2.93796000  | 5.58327100  |
| H | 3.89004400  | 4.78964200  | -2.63775100 | H | 1.25151900  | 3.42979300  | 5.29681600  |
| C | 3.18331500  | 6.58023200  | -3.63653800 | O | 4.11030600  | 0.32023700  | 0.60966700  |
| H | 2.29422700  | 6.95072800  | -4.16614400 | C | 4.07134800  | 0.40293500  | 1.84828900  |
| H | 3.38205900  | 7.26867400  | -2.80316800 | O | 2.99343200  | 0.44921900  | 2.58139400  |
| H | 4.03315400  | 6.64120300  | -4.32863000 | C | 5.35351200  | 0.45462200  | 2.66193500  |
| N | -2.13039500 | 2.26467200  | -0.37555100 | H | 5.40389200  | -0.42180000 | 3.32061700  |
| C | -2.75642800 | 2.18716500  | -1.60114900 | H | 5.35278900  | 1.34409300  | 3.30371200  |
| H | -2.17563200 | 2.12645200  | -2.51079700 | H | 6.22201900  | 0.46939700  | 1.99822600  |
| C | -4.11928900 | 2.18506700  | -1.41942200 | O | 0.55407900  | -0.66894100 | 3.49649500  |
| N | -4.30107800 | 2.28159400  | -0.04449000 | C | -0.19461500 | -1.68302700 | 3.40662600  |
| H | -5.18613600 | 2.07833000  | 0.42857600  | O | -0.66929900 | -2.16466100 | 2.32115500  |
| C | -3.08406600 | 2.30778900  | 0.54343500  | C | -0.56900300 | -2.42363300 | 4.68087500  |
| H | -2.91933800 | 2.32975800  | 1.61033300  | H | -1.62994800 | -2.69913100 | 4.60028600  |
| C | -5.24046300 | 2.11417700  | -2.42319900 | H | -0.01358600 | -3.37534300 | 4.65556700  |
| H | -5.34457000 | 3.07831700  | -2.94332800 | C | -0.28246600 | -1.66954500 | 5.98277600  |
| H | -4.95612200 | 1.38824100  | -3.19779300 | H | -0.83821400 | -0.72094900 | 5.98155800  |
| C | -6.63635900 | 1.74597000  | -1.85707800 | H | 0.78019100  | -1.39738000 | 6.01498200  |
| H | -7.04377500 | 2.58345200  | -1.27955100 | C | -0.65676100 | -2.49223600 | 7.22064600  |
| H | -7.31670300 | 1.57296500  | -2.70214200 | H | -1.72489500 | -2.75205000 | 7.22325100  |
| C | -6.61428200 | 0.54459800  | -0.91383900 | H | -0.44720700 | -1.93525200 | 8.14292600  |
| O | -6.56824600 | 0.69557800  | 0.31434700  | H | -0.08795100 | -3.43182400 | 7.26257400  |
| N | -6.58849200 | -0.68409000 | -1.49190500 | O | 0.00721900  | 1.08476600  | -1.58747500 |
| H | -6.61511400 | -0.74702100 | -2.50198600 | H | -0.38632400 | 0.19033000  | -1.49459700 |
| C | -6.36905800 | -1.90698000 | -0.71288000 |   |             |             |             |

**Pro:**

|    |             |             |             |   |             |             |             |
|----|-------------|-------------|-------------|---|-------------|-------------|-------------|
| Ca | -2.53167200 | 0.37103600  | -0.87225700 | N | 2.03475700  | -1.99177500 | -1.35686400 |
| Mn | 0.04583600  | -1.87290100 | -0.70614400 | C | 2.61014900  | -1.34602700 | -2.43085000 |
| Mn | -1.09263400 | -1.26612800 | 1.71860600  | H | 1.99475600  | -0.84989100 | -3.16846400 |
| Mn | 0.23090600  | 1.17238200  | 1.19054300  | C | 3.97894100  | -1.45282700 | -2.34938200 |
| Mn | -0.18883200 | 3.67529400  | -0.71900500 | N | 4.21561300  | -2.20114600 | -1.20223300 |
| O  | -1.57591600 | -1.77560400 | 0.05581200  | H | 5.12654300  | -2.25595100 | -0.73785900 |
| O  | 0.55261900  | -0.95487000 | 0.83735200  | C | 3.02520500  | -2.48606400 | -0.62846500 |
| O  | -1.40981900 | 0.49620300  | 1.46816700  | H | 2.90557400  | -3.01528900 | 0.30505100  |
| O  | -0.46290100 | 2.00977100  | -0.33664600 | C | 5.06020700  | -0.92798100 | -3.25758200 |
| O  | 0.11510300  | 4.36996600  | 0.98531900  | H | 5.11566700  | -1.53720600 | -4.17232800 |
| O  | -4.23509400 | 0.40691800  | -2.76664300 | H | 4.76587700  | 0.07782600  | -3.58822900 |
| H  | -4.04446400 | -0.51108300 | -3.05118100 | C | 6.48871100  | -0.87773800 | -2.65410000 |
| H  | -3.61016500 | 0.93571600  | -3.30780000 | H | 6.89526000  | -1.89106100 | -2.55974300 |
| O  | -1.68036000 | 1.38708200  | -3.18045300 | H | 7.13841400  | -0.33124100 | -3.35130100 |
| H  | -1.01962600 | 0.66212900  | -3.15155700 | C | 6.53785500  | -0.26231900 | -1.25694100 |
| H  | -1.14830300 | 2.21580800  | -3.02587900 | O | 6.51887700  | -0.97300100 | -0.24329500 |
| O  | -0.23329900 | 3.67035500  | -2.57612200 | N | 6.54392400  | 1.09459500  | -1.18865000 |
| H  | -0.91203900 | 4.31887400  | -2.84175100 | H | 6.54265000  | 1.62323000  | -2.05213300 |
| O  | 0.45444300  | 5.53361200  | 0.17836600  | C | 6.36330000  | 1.81124800  | 0.07793300  |
| H  | 1.42869500  | 5.43234800  | 0.09130700  | H | 6.95626100  | 1.28833300  | 0.83528900  |
| O  | -3.33711400 | 2.62348100  | -0.54694600 | H | 6.78688500  | 2.81568000  | -0.05008800 |
| C  | -3.10564100 | 3.83562000  | -0.54644000 | C | 4.89455000  | 1.88104200  | 0.53196400  |
| O  | -1.93242500 | 4.39145200  | -0.72164700 | H | 4.51804600  | 0.86272100  | 0.67937300  |
| C  | -4.21508200 | 4.86074400  | -0.33388900 | H | 4.85891700  | 2.37135900  | 1.51488800  |
| H  | -3.98425200 | 5.38329900  | 0.60657200  | C | 3.99942400  | 2.62849000  | -0.45876100 |
| H  | -4.12247100 | 5.62212200  | -1.12119000 | H | 4.08698000  | 2.18359100  | -1.46254300 |
| C  | -5.61639500 | 4.25179500  | -0.30010800 | H | 4.30341700  | 3.67880300  | -0.57070000 |
| H  | -5.70372800 | 3.51146000  | 0.50283700  | C | 2.50651300  | 2.61214800  | -0.14167600 |
| H  | -5.85040200 | 3.74162900  | -1.24201600 | O | 2.08486100  | 1.78467800  | 0.71658000  |
| H  | -6.36743800 | 5.03484300  | -0.13501400 | O | 1.80699200  | 3.43809100  | -0.81745300 |
| O  | -0.63110100 | -2.86194900 | -2.21676500 | O | 0.42627900  | -3.61161400 | 0.18688200  |
| C  | -1.75764000 | -2.62346700 | -2.81958800 | C | -0.01192100 | -3.93456400 | 1.34438000  |
| O  | -2.51488300 | -1.66236700 | -2.58829800 | O | -0.61807400 | -3.17237100 | 2.14833800  |
| C  | -2.10295800 | -3.66173900 | -3.88555900 | C | 0.21650700  | -5.38239100 | 1.75875400  |
| H  | -1.22731800 | -3.76648400 | -4.54344300 | H | 1.22434200  | -5.66558300 | 1.42668100  |
| H  | -2.19699100 | -4.63072300 | -3.37110600 | H | -0.47514500 | -5.98391600 | 1.14851700  |
| C  | -3.36481600 | -3.35494300 | -4.69552100 | C | 0.00878700  | -5.66275600 | 3.24742100  |
| H  | -3.25308800 | -2.37609000 | -5.18377700 | H | 0.16574200  | -6.72822000 | 3.45783400  |
| H  | -4.21839900 | -3.25891500 | -4.01044800 | H | 0.71018300  | -5.08510500 | 3.86197500  |
| C  | -3.65999800 | -4.42930800 | -5.74818700 | H | -1.00476800 | -5.39060400 | 3.56055800  |
| H  | -2.83281900 | -4.52459500 | -6.46580700 | O | -4.06679500 | -0.55005500 | 0.78260500  |
| H  | -3.80833700 | -5.41388100 | -5.28273300 | C | -3.95877300 | -1.15997200 | 1.85939100  |
| H  | -4.56813000 | -4.18937900 | -6.31626900 | O | -2.84396800 | -1.54200300 | 2.41835300  |

|   |             |             |            |   |             |             |             |
|---|-------------|-------------|------------|---|-------------|-------------|-------------|
| C | -5.19273500 | -1.53322200 | 2.66397200 | C | 0.36368400  | -0.83732700 | 6.26507900  |
| H | -5.14512200 | -1.05799400 | 3.65192200 | H | 0.88729200  | -1.73575100 | 5.90948000  |
| H | -5.21642200 | -2.61799000 | 2.82594100 | H | -0.70787200 | -1.06290500 | 6.18852300  |
| H | -6.09688100 | -1.21223800 | 2.14008000 | C | 0.74164500  | -0.55360700 | 7.72318100  |
| O | -0.34330800 | -0.87264700 | 3.55604100 | H | 1.81759200  | -0.35409700 | 7.82820400  |
| C | 0.33162100  | 0.14442100  | 3.88033600 | H | 0.49699800  | -1.40772800 | 8.36763700  |
| O | 0.74607900  | 1.05061100  | 3.07486600 | H | 0.20365800  | 0.32218900  | 8.11272700  |
| C | 0.69737900  | 0.33896200  | 5.34345600 | O | -0.13950100 | -0.33471300 | -1.73013000 |
| H | 1.76872200  | 0.58502800  | 5.38027800 | H | 0.35414800  | 0.40868600  | -1.33334400 |
| H | 0.17634900  | 1.25211100  | 5.67323100 |   |             |             |             |

**Table S21** Reaction parameters for the closed-cubane W1 (hydroxyl)-O4 (oxo) nucleophilic attack:

| Spin state | Spin topology<br>(Mn1~Mn4-O4/O6/O7) | Gibbs Free energy (a.u.) |            |            |
|------------|-------------------------------------|--------------------------|------------|------------|
|            |                                     | Rea                      | TS         | Pro        |
| doublet    | $\alpha\alpha\beta\alpha$           | -3366.2156               | -3366.1865 | -3366.1882 |
|            | $\alpha\beta\alpha\beta$            | -3366.2101               | -3366.1868 | -3366.2034 |
|            | $\alpha\beta\beta\alpha$            | -3366.2189               | -3366.1871 | -3366.1881 |
|            | $\beta\alpha\alpha\beta$            | -3366.2098               | -3366.1853 | -3366.2005 |
|            | $\beta\alpha\beta\alpha$            | -3366.2190               | -3366.1846 | -3366.1870 |
|            | $\beta\beta\alpha\alpha$            | -3366.2131               | -3366.1860 | -3366.2008 |
| sextet     | $\alpha\alpha\alpha\beta\beta$      | -3366.2177               | -3366.1862 | -3366.1879 |
|            | $\alpha\alpha\beta\alpha\beta$      | -3366.2063               | -3366.1850 | -3366.1994 |
|            | $\alpha\beta\alpha\alpha\beta$      | -3366.2155               | -3366.1851 | -3366.1867 |
|            | $\beta\alpha\alpha\alpha\beta$      | -3366.2167               | -3366.1875 | -3366.1899 |
| octet      | $\alpha\alpha\alpha\beta\alpha$     | -3366.2146               | -3366.1899 | -3366.2060 |
|            | $\alpha\alpha\beta\alpha\alpha$     | -3366.2185               | -3366.1865 | -3366.1891 |
|            | $\alpha\beta\alpha\alpha\alpha$     | -3366.2082               | -3366.1851 | -3366.2007 |
|            | $\beta\alpha\alpha\alpha\alpha$     | -3366.2089               | -3366.1861 | -3366.2002 |
| 12-et      | $\alpha\alpha\alpha\alpha\beta$     | -3366.2228               | -3366.1887 | -3366.1888 |
| 14-et      | $\alpha\alpha\alpha\alpha\alpha$    | -3366.2112               | -3366.1879 | -3366.2024 |

  

| Spin state | Spin topology<br>(Mn1~Mn4-O4/O10) | Relative Gibbs Free energy (kcal/mol) |                            |                        |                        |
|------------|-----------------------------------|---------------------------------------|----------------------------|------------------------|------------------------|
|            |                                   | $\Delta G^\ddagger(\text{Rea-TS})$    | $\Delta G(\text{Rea-Pro})$ | $\Delta G(\text{Rea})$ | $\Delta G(\text{Pro})$ |
| doublet    | $\alpha\alpha\beta\beta\alpha$    | 18.3                                  | 17.2                       | 4.5                    | 11.2                   |
|            | $\alpha\beta\alpha\beta\alpha$    | 14.6                                  | 4.2                        | 8.0                    | 1.6                    |
|            | $\alpha\beta\beta\alpha\alpha$    | 20.0                                  | 19.3                       | 2.4                    | 11.2                   |
|            | $\beta\alpha\alpha\beta\alpha$    | 15.4                                  | 5.8                        | 8.2                    | 3.5                    |
|            | $\beta\alpha\beta\alpha\alpha$    | 21.6                                  | 20.1                       | 2.4                    | 11.9                   |
|            | $\beta\beta\alpha\alpha\alpha$    | 17.0                                  | 7.7                        | 6.1                    | 3.3                    |
| sextet     | $\alpha\alpha\alpha\beta\beta$    | 19.8                                  | 18.7                       | 3.2                    | 11.4                   |
|            | $\alpha\alpha\beta\alpha\beta$    | 13.4                                  | 4.3                        | 10.4                   | 4.1                    |

|       |                                  |      |      |     |      |
|-------|----------------------------------|------|------|-----|------|
|       | $\alpha\beta\alpha\beta$         | 19.1 | 18.1 | 4.6 | 12.1 |
|       | $\beta\alpha\alpha\beta$         | 18.3 | 16.8 | 3.8 | 10.1 |
| octet | $\alpha\alpha\beta\alpha$        | 15.5 | 5.4  | 5.1 | 0.0  |
|       | $\alpha\alpha\beta\alpha\alpha$  | 20.1 | 18.4 | 2.7 | 10.6 |
|       | $\alpha\beta\alpha\alpha\alpha$  | 14.5 | 4.7  | 9.2 | 3.3  |
|       | $\beta\alpha\alpha\alpha\alpha$  | 14.3 | 5.5  | 8.7 | 3.6  |
| 12-et | $\alpha\alpha\alpha\alpha\beta$  | 21.4 | 21.3 | 0.0 | 10.8 |
| 14-et | $\alpha\alpha\alpha\alpha\alpha$ | 14.6 | 5.5  | 7.3 | 2.3  |

| Spin state | Spin topology       |       | Mulliken spin density |       |       |
|------------|---------------------|-------|-----------------------|-------|-------|
|            | (Mn1~Mn4- O4/O6/O7) |       | Rea                   | TS    | Pro   |
| doublet    | $\alpha$            | Mn1   | 2.93                  | 2.96  | 2.97  |
|            | $\alpha$            | Mn2   | 2.94                  | 2.94  | 2.93  |
|            | $\beta$             | Mn3   | -2.81                 | -2.25 | -1.99 |
|            | $\beta$             | Mn4   | -2.93                 | -2.91 | -2.91 |
|            | $\alpha$            | O4    | 0.49                  | 0.06  | -0.01 |
|            | $\alpha$            | O6    | 0.37                  | 0.23  | 0.02  |
|            | $\alpha$            | Mn1   | 2.93                  | 2.93  | 2.89  |
|            | $\beta$             | Mn2   | -2.94                 | -2.93 | -2.88 |
|            | $\alpha$            | Mn3   | 2.86                  | 3.48  | 3.88  |
|            | $\beta$             | Mn4   | -2.92                 | -2.90 | -2.90 |
|            | $\alpha$            | O4    | 0.47                  | 0.34  | 0.00  |
|            | $\alpha$            | O6    | 0.62                  | -0.06 | 0.01  |
|            | $\alpha$            | Mn1   | -2.92                 | 2.97  | 2.98  |
|            | $\beta$             | Mn2   | -2.92                 | -2.93 | -2.94 |
|            | $\beta$             | Mn3   | -2.84                 | -2.15 | -2.02 |
|            | $\alpha$            | Mn4   | 2.84                  | 2.90  | 2.91  |
|            | $\alpha$            | O4    | 0.43                  | 0.03  | 0.00  |
|            | $\alpha$            | O6    | 0.47                  | 0.14  | 0.03  |
|            | $\beta$             | Mn1   | -2.92                 | -2.93 | -2.93 |
|            | $\alpha$            | Mn2   | 2.93                  | 2.94  | 2.95  |
| $\alpha$   | Mn3                 | 2.89  | 3.51                  | 3.87  |       |
| $\beta$    | Mn4                 | -2.92 | -2.90                 | -2.90 |       |
| $\alpha$   | O4                  | 0.47  | 0.12                  | 0.01  |       |
| $\alpha$   | O6                  | 0.61  | -0.06                 | 0.01  |       |
| $\beta$    | Mn1                 | -2.92 | -2.92                 | -2.92 |       |
| $\alpha$   | Mn2                 | 2.94  | 2.95                  | 2.94  |       |
| $\beta$    | Mn3                 | -2.82 | -2.12                 | -2.01 |       |
| $\alpha$   | Mn4                 | 2.84  | 2.90                  | 2.91  |       |
| $\alpha$   | O4                  | 0.42  | 0.02                  | 0.00  |       |
| $\alpha$   | O6                  | 0.47  | 0.12                  | 0.03  |       |
| $\beta$    | Mn1                 | -2.93 | -2.94                 | -2.93 |       |
| $\beta$    | Mn2                 | -2.94 | -2.94                 | -2.92 |       |
| $\alpha$   | Mn3                 | 2.87  | 3.49                  | 3.0   |       |

|          |          |      |       |       |       |
|----------|----------|------|-------|-------|-------|
|          | $\alpha$ | Mn4  | 2.85  | 2.88  | 3.04  |
|          | $\alpha$ | O4   | 0.54  | 0.13  | -0.02 |
|          |          | O6   | 0.56  | 0.33  | 0.00  |
|          | $\alpha$ | Mn1  | 2.93  | 2.92  | 2.93  |
|          | $\alpha$ | Mn2  | 2.92  | 2.94  | 2.94  |
|          | $\alpha$ | Mn3  | 2.84  | 2.22  | 1.98  |
|          | $\beta$  | Mn4  | -2.82 | -2.88 | -2.90 |
|          | $\beta$  | O4   | -0.49 | -0.05 | -0.01 |
|          |          | O6   | -0.41 | -0.22 | -0.01 |
| sextet   | $\alpha$ | Mn1  | 2.93  | 2.93  | 2.94  |
|          | $\alpha$ | Mn2  | 2.94  | 2.94  | 2.93  |
|          | $\beta$  | Mn3  | -2.84 | -3.47 | -3.83 |
|          | $\alpha$ | Mn4  | 2.89  | 2.89  | 2.90  |
|          | $\beta$  | O4   | -0.42 | -0.35 | -0.01 |
|          |          | O6   | -0.66 | 0.07  | -0.02 |
|          | $\alpha$ | Mn1  | 2.92  | 2.92  | 2.94  |
|          | $\beta$  | Mn2  | -2.93 | -2.93 | -2.91 |
|          | $\alpha$ | Mn3  | 2.83  | 2.25  | 1.98  |
|          | $\alpha$ | Mn4  | 2.93  | 2.91  | 2.91  |
|          | $\beta$  | O4   | -0.49 | -0.06 | 0.01  |
|          |          | O6   | -0.37 | -0.22 | -0.02 |
|          | $\beta$  | Mn1  | -2.92 | -2.96 | -2.99 |
|          | $\alpha$ | Mn2  | 2.93  | 2.93  | 2.93  |
|          | $\alpha$ | Mn3  | 2.85  | 2.28  | 2.01  |
|          | $\alpha$ | Mn4  | 2.93  | 2.91  | 2.91  |
|          | $\beta$  | O4   | -0.50 | -0.07 | 0.00  |
|          |          | O6   | -0.37 | -0.23 | -0.02 |
| octet    | $\alpha$ | Mn1  | 2.93  | 3.93  | 2.92  |
|          | $\alpha$ | Mn2  | 2.93  | 2.94  | 2.95  |
|          | $\alpha$ | Mn3  | 2.89  | 3.49  | 3.89  |
|          | $\beta$  | Mn4  | -2.92 | -2.90 | -2.90 |
|          | $\alpha$ | O4   | 0.47  | 0.13  | 0.01  |
|          |          | O6   | 0.61  | 0.35  | 0.01  |
|          | $\alpha$ | Mn1  | 2.93  | 2.96  | 2.97  |
|          | $\alpha$ | Mn2  | 2.94  | 2.93  | 2.92  |
|          | $\beta$  | Mn3  | -2.79 | -2.21 | -1.97 |
|          | $\alpha$ | Mn4  | 2.82  | 2.88  | 2.90  |
|          | $\alpha$ | O4   | 0.48  | 0.05  | 0.01  |
|          |          | O6   | 0.42  | 0.23  | 0.01  |
|          | $\alpha$ | Mn1  | 2.92  | 2.92  | 2.92  |
|          | $\beta$  | Mn2  | -2.93 | -2.93 | -2.91 |
|          | $\alpha$ | Mn3  | 2.88  | 3.49  | 3.87  |
| $\alpha$ | Mn4      | 2.84 | 2.87  | 2.94  |       |
| $\alpha$ | O4       | 0.50 | 0.11  | 0.00  |       |

|       |          |     |       |       |       |
|-------|----------|-----|-------|-------|-------|
|       |          | O6  | 0.62  | 0.37  | 0.02  |
|       | $\beta$  | Mn1 | -2.92 | -2.92 | -2.92 |
|       | $\alpha$ | Mn2 | 2.92  | 2.94  | 2.94  |
|       | $\alpha$ | Mn3 | 2.91  | 3.51  | 3.86  |
|       | $\alpha$ | Mn4 | 2.83  | 2.87  | 2.93  |
|       | $\alpha$ | O4  | 0.62  | 0.11  | 0.00  |
|       |          | O6  | 0.50  | 0.37  | 0.02  |
| 12-et | $\alpha$ | Mn1 | 2.93  | 2.92  | 2.93  |
|       | $\alpha$ | Mn2 | 2.92  | 2.93  | 2.94  |
|       | $\alpha$ | Mn3 | 2.87  | 2.15  | 2.02  |
|       | $\alpha$ | Mn4 | 2.95  | 2.91  | 2.91  |
|       | $\beta$  | O4  | -0.51 | -0.04 | -0.01 |
|       |          | O6  | -0.40 | -0.12 | -0.02 |
| 14-et | $\alpha$ | Mn1 | 2.92  | 2.93  | 2.93  |
|       | $\alpha$ | Mn2 | 2.93  | 2.94  | 2.94  |
|       | $\alpha$ | Mn3 | 2.91  | 3.51  | 3.89  |
|       | $\alpha$ | Mn4 | 2.84  | 2.87  | 2.94  |
|       |          | O4  | 0.49  | 0.11  | 0.00  |
|       |          | O6  | 0.61  | 0.37  | 0.02  |

**Rea:**

|    |             |             |             |   |             |             |             |
|----|-------------|-------------|-------------|---|-------------|-------------|-------------|
| Ca | -2.70440500 | 0.40908000  | -0.82922100 | H | -4.32473400 | 4.74260700  | -1.07091800 |
| Mn | -0.16030400 | -1.76329300 | -0.21265000 | H | -3.03720800 | 5.95971400  | -1.29423900 |
| Mn | -1.40255200 | -0.95230400 | 2.05010800  | C | -3.71613900 | 5.04262500  | -3.14301600 |
| Mn | 0.21770800  | 0.89492000  | 0.81005200  | H | -4.08572100 | 4.07361100  | -3.50133400 |
| Mn | 0.48596100  | 3.36942100  | -1.43113600 | H | -2.81052300 | 5.29665200  | -3.70669400 |
| O  | -1.83927600 | -1.64878500 | 0.43142800  | H | -4.48005400 | 5.80164700  | -3.35340000 |
| O  | 0.37040900  | -0.95749400 | 1.37515000  | O | -0.72853600 | -2.65074200 | -1.82717500 |
| O  | -1.51061100 | 0.70413900  | 1.36216900  | C | -1.87860900 | -2.58705000 | -2.42272800 |
| O  | -0.15802700 | -0.02871600 | -0.80574600 | O | -2.70185300 | -1.65808800 | -2.29588000 |
| O  | -0.13918200 | 2.46153100  | 0.11181800  | C | -2.15661500 | -3.76548400 | -3.35072400 |
| O  | -5.00534500 | -0.20937500 | -1.64116100 | H | -1.30530500 | -3.84554600 | -4.04385200 |
| H  | -5.33036900 | -0.47517300 | -0.75777500 | H | -2.11203400 | -4.67666500 | -2.73453100 |
| H  | -4.72624400 | -1.03016400 | -2.09190600 | C | -3.47952400 | -3.68769500 | -4.11673400 |
| O  | -2.33194100 | 1.06832900  | -3.20966900 | H | -3.51180500 | -2.75282600 | -4.69370600 |
| H  | -2.14383900 | 0.28603800  | -3.75401800 | H | -4.31011000 | -3.62997800 | -3.39895800 |
| H  | -1.48623000 | 1.59786800  | -3.18908100 | C | -3.68493700 | -4.88540900 | -5.05084200 |
| O  | 1.18711000  | 4.50751200  | -2.62877800 | H | -2.88487100 | -4.94815900 | -5.80175200 |
| H  | 2.13848700  | 4.29421200  | -2.68229400 | H | -4.63969700 | -4.81063900 | -5.58695000 |
| O  | 0.93777200  | 4.33603400  | 0.22800000  | H | -3.68893300 | -5.83190900 | -4.49228100 |
| H  | 0.08947300  | 4.73451800  | 0.51114800  | N | 1.78087800  | -2.08551200 | -0.86376100 |
| O  | -2.72822600 | 2.78473400  | -0.96277100 | C | 2.42430000  | -1.47973800 | -1.92285100 |
| C  | -2.37684000 | 3.91322600  | -1.33639100 | H | 1.91131900  | -0.76411000 | -2.55094300 |
| O  | -1.15554200 | 4.31203300  | -1.56128500 | C | 3.72344200  | -1.92718100 | -1.98132800 |
| C  | -3.41637600 | 4.98782600  | -1.63340800 | N | 3.84226400  | -2.83407100 | -0.93385600 |

|   |             |             |             |   |             |             |             |
|---|-------------|-------------|-------------|---|-------------|-------------|-------------|
| H | 4.74190100  | -3.13436900 | -0.54953700 | H | 0.65603800  | -5.49171700 | 2.25237200  |
| C | 2.66161700  | -2.88305100 | -0.27775100 | H | -1.05139900 | -5.73693600 | 1.94980300  |
| H | 2.46708100  | -3.48285400 | 0.59875200  | H | -5.40234400 | -0.25884400 | 3.92926600  |
| C | 4.83699100  | -1.60002500 | -2.94195800 | C | -0.60399900 | -5.24249700 | 4.02275800  |
| H | 4.71647800  | -2.17514000 | -3.87244300 | H | -0.51052300 | -6.28910000 | 4.33912300  |
| H | 4.73165300  | -0.54499900 | -3.22874100 | H | 0.11062600  | -4.64414100 | 4.60093500  |
| C | 6.27904300  | -1.85970500 | -2.42232100 | H | -1.60944700 | -4.89009900 | 4.27663600  |
| H | 6.49488700  | -2.93396200 | -2.41836200 | O | -4.33311300 | -0.19100300 | 0.98972500  |
| H | 6.98803800  | -1.38735100 | -3.11578900 | C | -4.25593100 | -0.63850600 | 2.15122400  |
| C | 6.47912600  | -1.36606500 | -0.99188500 | O | -3.16027900 | -0.98441700 | 2.75499600  |
| O | 6.36678900  | -2.13677700 | -0.03001200 | C | -5.50220300 | -0.82756400 | 2.99678200  |
| N | 6.69859700  | -0.03285900 | -0.83724000 | H | -5.60434600 | -1.88489200 | 3.27175400  |
| H | 6.73135800  | 0.53996100  | -1.67195900 | H | -6.39005600 | -0.49535200 | 2.45213500  |
| C | 6.47731400  | 0.63960800  | 0.44827200  | O | -0.64564700 | -0.15048800 | 3.71452800  |
| H | 6.89859900  | -0.00391900 | 1.22638000  | C | 0.17289400  | 0.82380600  | 3.70009500  |
| H | 7.04768900  | 1.57708500  | 0.43674500  | O | 0.66121700  | 1.39475500  | 2.66695300  |
| C | 4.98252200  | 0.89088800  | 0.72360300  | C | 0.63018700  | 1.36846900  | 5.04337400  |
| H | 4.46081300  | -0.07281100 | 0.73843500  | H | 0.09100500  | 0.83068400  | 5.83174800  |
| H | 4.87262300  | 1.31728800  | 1.73003200  | H | 1.70004300  | 1.12825800  | 5.14487800  |
| C | 4.33798100  | 1.81749600  | -0.31076300 | C | 0.43419700  | 2.88976000  | 5.17078800  |
| H | 4.64094700  | 1.53766700  | -1.33070700 | H | -0.63255700 | 3.12697600  | 5.04360900  |
| H | 4.66701700  | 2.85814600  | -0.17810400 | H | 0.96523800  | 3.38500300  | 4.34803800  |
| C | 2.80954000  | 1.84135800  | -0.33915400 | C | 0.92541000  | 3.42502900  | 6.51959800  |
| O | 2.18643600  | 1.07502600  | 0.44987600  | H | 0.38934200  | 2.95660900  | 7.35673500  |
| O | 2.32317700  | 2.63134000  | -1.20842400 | H | 0.77384900  | 4.50975100  | 6.59129400  |
| O | 0.01191400  | -3.52782100 | 0.78962600  | H | 1.99764400  | 3.22750300  | 6.65925100  |
| C | -0.46718600 | -3.70533000 | 1.96345500  | O | 0.08395500  | 2.02822900  | -2.59745300 |
| O | -1.04225000 | -2.83706800 | 2.68710400  | H | 0.15183000  | 1.19769200  | -2.06140100 |
| C | -0.34147600 | -5.11879700 | 2.52148500  |   |             |             |             |

**TS:**

|    |             |             |             |   |             |            |             |
|----|-------------|-------------|-------------|---|-------------|------------|-------------|
| Ca | -2.71914100 | 0.51294200  | -0.69564400 | H | -2.30771800 | 0.31926700 | -3.55666900 |
| Mn | -0.25813900 | -1.70022100 | -0.26151000 | H | -1.50635000 | 1.61044900 | -3.15767700 |
| Mn | -1.38545000 | -0.91445900 | 2.07547300  | O | 1.32071500  | 4.54162400 | -2.55520100 |
| Mn | 0.27818900  | 0.87166600  | 0.87254000  | H | 2.25809700  | 4.28886400 | -2.66474900 |
| Mn | 0.58133400  | 3.33751800  | -1.46642400 | O | 0.72568900  | 3.88339900 | 0.69113500  |
| O  | -1.91279600 | -1.55054600 | 0.45503200  | H | -0.08484500 | 4.39106000 | 0.90596400  |
| O  | 0.35422900  | -0.98037200 | 1.33295200  | O | -2.63406900 | 2.90275300 | -0.85243200 |
| O  | -1.44100900 | 0.77003500  | 1.43975400  | C | -2.26308700 | 3.99161400 | -1.30682900 |
| O  | -0.22446700 | 0.03271400  | -0.82703300 | O | -1.02761500 | 4.32784800 | -1.58501400 |
| O  | 0.00190300  | 2.57023200  | 0.17900000  | C | -3.26769100 | 5.08456100 | -1.64448600 |
| O  | -5.06332400 | 0.02158900  | -1.47383900 | H | -4.17874300 | 4.89395300 | -1.06579900 |
| H  | -5.36816100 | -0.24766300 | -0.58364900 | H | -2.85463400 | 6.05812800 | -1.35229700 |
| H  | -4.82518800 | -0.79967700 | -1.94741100 | C | -3.57667100 | 5.08086300 | -3.15377200 |
| O  | -2.39608800 | 1.18207200  | -3.11537100 | H | -3.97179800 | 4.10651500 | -3.46698400 |

|             |             |             |             |    |             |             |             |
|-------------|-------------|-------------|-------------|----|-------------|-------------|-------------|
| H           | -2.66965800 | 5.28908400  | -3.73370000 | C  | 4.41221300  | 1.71359300  | -0.41745300 |
| H           | -4.32350900 | 5.84872100  | -3.39071300 | H  | 4.64628300  | 1.41129100  | -1.44981100 |
| O           | -0.91139100 | -2.56644500 | -1.87640800 | H  | 4.79950900  | 2.73681500  | -0.31193000 |
| C           | -2.06721500 | -2.44556300 | -2.43848400 | C  | 2.88733500  | 1.79778000  | -0.36350600 |
| O           | -2.84615400 | -1.47741700 | -2.28381400 | O  | 2.25708600  | 1.00493200  | 0.37357400  |
| C           | -2.43222000 | -3.60133900 | -3.36637200 | O  | 2.40512000  | 2.69494600  | -1.14794300 |
| H           | -1.59570100 | -3.73669900 | -4.06861800 | O  | -0.11996200 | -3.51407600 | 0.70049400  |
| H           | -2.44082400 | -4.51402000 | -2.75060000 | C  | -0.57513400 | -3.70364400 | 1.87984500  |
| C           | -3.75596400 | -3.43867300 | -4.11740700 | O  | -1.08992600 | -2.83346600 | 2.64657600  |
| H           | -3.73543200 | -2.50330200 | -4.69439100 | C  | -0.50445100 | -5.13845400 | 2.39520200  |
| H           | -4.57310700 | -3.32791900 | -3.39063200 | H  | 0.45514800  | -5.56025200 | 2.06718500  |
| C           | -4.04863400 | -4.61997200 | -5.04920700 | H  | -1.27704700 | -5.69887700 | 1.84550300  |
| H           | -3.26267500 | -4.73370000 | -5.80906000 | H  | -5.29542700 | -0.17601100 | 4.12785200  |
| H           | -5.00272400 | -4.48414600 | -5.57459700 | C  | -0.70092600 | -5.28964500 | 3.90414900  |
| H           | -4.10676800 | -5.56460000 | -4.49044800 | H  | -0.65509000 | -6.34834200 | 4.19000800  |
| N           | 1.66263700  | -2.08920500 | -0.97364600 | H  | 0.07520900  | -4.75018600 | 4.46085400  |
| C           | 2.30970900  | -1.50779300 | -2.04325900 | H  | -1.66971700 | -4.88532100 | 4.21632400  |
| H           | 1.81206300  | -0.77388200 | -2.66269800 | O  | -4.33558000 | -0.02112900 | 1.13868000  |
| C           | 3.59052400  | -2.00256900 | -2.12636600 | C  | -4.22879500 | -0.50098000 | 2.28744700  |
| N           | 3.69434600  | -2.91414400 | -1.08145600 | O  | -3.12728800 | -0.89163300 | 2.84390100  |
| H           | 4.58666100  | -3.25402500 | -0.71559100 | C  | -5.45467900 | -0.67871700 | 3.16641300  |
| C           | 2.52348300  | -2.91892300 | -0.40462200 | H  | -5.60093700 | -1.74542500 | 3.37936300  |
| H           | 2.32148800  | -3.51147300 | 0.47519900  | H  | -6.34324300 | -0.27294300 | 2.67510900  |
| C           | 4.69646200  | -1.71881000 | -3.10919500 | O  | -0.53492300 | -0.20673100 | 3.73881400  |
| H           | 4.53393500  | -2.28528800 | -4.03871300 | C  | 0.32473400  | 0.73681200  | 3.74229600  |
| H           | 4.63036000  | -0.65927300 | -3.39182800 | O  | 0.78965300  | 1.35064000  | 2.72896400  |
| C           | 6.13666200  | -2.04000200 | -2.62074900 | C  | 0.85901800  | 1.16028700  | 5.10387200  |
| H           | 6.30537300  | -3.12265500 | -2.61949400 | H  | 0.22818200  | 0.70285100  | 5.87508700  |
| H           | 6.85056500  | -1.59996400 | -3.33041300 | H  | 1.86416100  | 0.71906100  | 5.20345300  |
| C           | 6.39251300  | -1.55537300 | -1.19609400 | C  | 0.94892400  | 2.68325700  | 5.28547200  |
| O           | 6.27603700  | -2.32003700 | -0.23069700 | H  | -0.05527100 | 3.11898000  | 5.17220400  |
| N           | 6.67169600  | -0.23182400 | -1.04847700 | H  | 1.56184600  | 3.10094800  | 4.47677100  |
| H           | 6.70671900  | 0.34046800  | -1.88332300 | C  | 1.52909800  | 3.07355700  | 6.64889700  |
| C           | 6.53172700  | 0.44454200  | 0.24572700  | H  | 0.91572800  | 2.68281900  | 7.47279800  |
| H           | 6.95674000  | -0.21892900 | 1.00491800  | H  | 1.58037100  | 4.16459200  | 6.75988700  |
| H           | 7.14068100  | 1.35703100  | 0.21269300  | H  | 2.54636000  | 2.67680500  | 6.77657700  |
| C           | 5.06244600  | 0.75788600  | 0.58598900  | O  | 0.16890400  | 1.97277700  | -2.52834100 |
| H           | 4.49983900  | -0.18176400 | 0.62119300  | H  | 0.14383700  | 1.14236200  | -1.94544200 |
| H           | 5.01492700  | 1.18558900  | 1.59694000  |    |             |             |             |
| <b>Pro:</b> |             |             |             |    |             |             |             |
| Ca          | -2.71929600 | 0.55608600  | -0.65660200 | Mn | 0.61166500  | 3.36978400  | -1.43464000 |
| Mn          | -0.28997400 | -1.69643400 | -0.29089600 | O  | -1.93533800 | -1.53399900 | 0.44751100  |
| Mn          | -1.37805000 | -0.93160400 | 2.07199100  | O  | 0.35251800  | -1.01730000 | 1.31044300  |
| Mn          | 0.30260800  | 0.83518300  | 0.88280300  | O  | -1.41211000 | 0.76371500  | 1.45955600  |



|   |             |             |             |   |             |             |             |
|---|-------------|-------------|-------------|---|-------------|-------------|-------------|
| O | -0.23814500 | 0.04566200  | -0.83203600 | H | 4.47325300  | -2.29098200 | -4.10946000 |
| O | 0.05632900  | 2.62857800  | 0.23169500  | H | 4.58846200  | -0.67225400 | -3.44752300 |
| O | -5.07712900 | 0.11542500  | -1.42253000 | C | 6.08679100  | -2.07369700 | -2.69981700 |
| H | -5.37688500 | -0.16440300 | -0.53379500 | H | 6.24459500  | -3.15798000 | -2.70691100 |
| H | -4.85506500 | -0.70091600 | -1.91232000 | H | 6.79981300  | -1.63620500 | -3.41196700 |
| O | -2.40636300 | 1.25999400  | -3.07124600 | C | 6.35920100  | -1.60131400 | -1.27407700 |
| H | -2.34128400 | 0.39306200  | -3.50928100 | O | 6.24308500  | -2.37106500 | -0.31275100 |
| H | -1.50545600 | 1.66242900  | -3.11108900 | N | 6.65431500  | -0.28191300 | -1.11987900 |
| O | 1.35054100  | 4.58239200  | -2.51310000 | H | 6.68969600  | 0.29609600  | -1.95072200 |
| H | 2.29070200  | 4.33819600  | -2.61917500 | C | 6.54029100  | 0.38532600  | 0.18142900  |
| O | 0.71337800  | 3.80846500  | 0.85820200  | H | 6.96502300  | -0.29084700 | 0.92950100  |
| H | -0.08686700 | 4.31419000  | 1.11325700  | H | 7.16208400  | 1.28915200  | 0.14851800  |
| O | -2.59185900 | 2.95127700  | -0.77737200 | C | 5.08040300  | 0.71704700  | 0.54353100  |
| C | -2.22386900 | 4.04038200  | -1.23324200 | H | 4.50333800  | -0.21391000 | 0.57457600  |
| O | -0.99009300 | 4.37152700  | -1.52820400 | H | 5.05236200  | 1.13362600  | 1.55994100  |
| C | -3.22778100 | 5.13931600  | -1.55186000 | C | 4.43207700  | 1.69450800  | -0.43994400 |
| H | -4.13446700 | 4.94608500  | -0.96725400 | H | 4.64535700  | 1.39729000  | -1.47865700 |
| H | -2.80909100 | 6.10882600  | -1.25399000 | H | 4.83840100  | 2.70973300  | -0.33111200 |
| C | -3.54956800 | 5.15125700  | -3.05850700 | C | 2.90966600  | 1.80010600  | -0.36335900 |
| H | -3.94944000 | 4.18091600  | -3.37798900 | O | 2.27327600  | 0.98120600  | 0.33660400  |
| H | -2.64704600 | 5.36329900  | -3.64399400 | O | 2.43408600  | 2.74606600  | -1.09677500 |
| H | -4.29664400 | 5.92308900  | -3.28128100 | O | -0.16951000 | -3.52789600 | 0.63838400  |
| O | -0.97286700 | -2.52922700 | -1.91490800 | C | -0.61692600 | -3.73084000 | 1.81860400  |
| C | -2.13043500 | -2.37917300 | -2.46422900 | O | -1.10934500 | -2.86668500 | 2.60617700  |
| O | -2.89130400 | -1.39948300 | -2.28771700 | C | -0.56610200 | -5.17615600 | 2.30674000  |
| C | -2.52538800 | -3.51337700 | -3.40667300 | H | 0.38113100  | -5.60939200 | 1.95840700  |
| H | -1.69799800 | -3.65296500 | -4.11884400 | H | -1.35616300 | -5.71207600 | 1.75741900  |
| H | -2.54515800 | -4.43532200 | -2.80513000 | H | -5.25553200 | -0.17803800 | 4.18147500  |
| C | -3.85271600 | -3.31497100 | -4.14261300 | C | -0.74590600 | -5.35131700 | 3.81518400  |
| H | -3.82048400 | -2.37102400 | -4.70491000 | H | -0.71629400 | -6.41572300 | 4.08141200  |
| H | -4.66110400 | -3.20109800 | -3.40658000 | H | 0.04733000  | -4.83655400 | 4.37120800  |
| C | -4.17535300 | -4.47577400 | -5.09016100 | H | -1.70277100 | -4.93470500 | 4.14732500  |
| H | -3.39848200 | -4.59159500 | -5.85900300 | O | -4.32680000 | 0.02206900  | 1.18275600  |
| H | -5.13154100 | -4.31442900 | -5.60443500 | C | -4.21365700 | -0.47871900 | 2.32232700  |
| H | -4.24558500 | -5.42798800 | -4.54584300 | O | -3.11217600 | -0.89272000 | 2.86044600  |
| N | 1.62181600  | -2.10089400 | -1.02618800 | C | -5.43313000 | -0.65581200 | 3.21062300  |
| C | 2.26658500  | -1.51761600 | -2.09593400 | H | -5.59489100 | -1.72462600 | 3.40079600  |
| H | 1.76964300  | -0.77781900 | -2.70891600 | H | -6.32007900 | -0.22479600 | 2.73820500  |
| C | 3.54433800  | -2.01865700 | -2.18839200 | O | -0.50006900 | -0.26666800 | 3.73646800  |
| N | 3.64864900  | -2.93622800 | -1.14880700 | C | 0.37884500  | 0.66085500  | 3.75079800  |
| H | 4.54064900  | -3.28435400 | -0.79014200 | O | 0.84355300  | 1.28874400  | 2.74804600  |
| C | 2.48109300  | -2.93805500 | -0.46602300 | C | 0.93465700  | 1.03622500  | 5.11872100  |
| H | 2.28087000  | -3.53341600 | 0.41233900  | H | 0.27847700  | 0.60431100  | 5.88363200  |
| C | 4.64653800  | -1.73508500 | -3.17549000 | H | 1.91174100  | 0.53447300  | 5.21313800  |

|   |            |            |            |   |            |            |             |
|---|------------|------------|------------|---|------------|------------|-------------|
| C | 1.11362800 | 2.54765800 | 5.32369400 | H | 1.83199600 | 3.96727800 | 6.81962300  |
| H | 0.13644500 | 3.04307800 | 5.21904900 | H | 2.70957800 | 2.42561100 | 6.81141600  |
| H | 1.74867000 | 2.94168000 | 4.52020300 | O | 0.17992000 | 1.99388400 | -2.46129900 |
| C | 1.71704000 | 2.88290200 | 6.69175600 | H | 0.14135900 | 1.15171300 | -1.88264600 |
| H | 1.08302600 | 2.51578100 | 7.51088800 |   |            |            |             |

## W2 (hydroxyl/oxyl)-O5 (oxo)

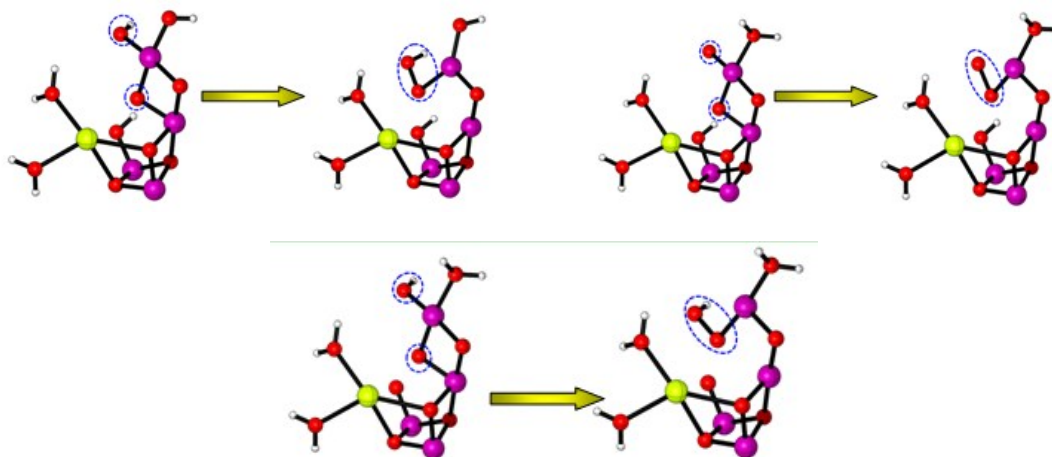

**Fig. S10** Pictorial exhibitions for the open-cubane W2 (hydroxyl/oxyl)-O5 (oxo) nucleophilic attack with previous deprotonation sites of W1, W2 and Wx.

**Table S22** Reaction parameters for the open-cubane W2 (hydroxyl/oxyl)-O5 (oxo) nucleophilic attack with deprotonated W1:

| Spin state | Spin topology<br>(Mn1~Mn4-OX)    | Gibbs Free energy (a.u.) |            |            |
|------------|----------------------------------|--------------------------|------------|------------|
|            |                                  | Rea                      | TS         | Pro        |
| doublet    | $\alpha\alpha\beta\alpha$        | \                        | \          | \          |
|            | $\alpha\beta\alpha\beta$         | -3366.2100               | -3366.1845 | -3366.2030 |
|            | $\alpha\beta\beta\alpha$         | \                        | \          | \          |
|            | $\beta\alpha\alpha\beta$         | -3366.2088               | -3366.1834 | -3366.1917 |
|            | $\beta\alpha\beta\alpha$         | \                        | \          | \          |
|            | $\beta\beta\alpha\alpha$         | -3366.2230               | -3366.1822 | -3366.2159 |
| sextet     | $\alpha\alpha\alpha\beta$        | \                        | \          | \          |
|            | $\alpha\alpha\beta\alpha$        | -3366.2099               | -3366.1852 | -3366.1941 |
|            | $\alpha\beta\alpha\alpha$        | \                        | \          | \          |
|            | $\beta\alpha\alpha\alpha$        | \                        | \          | \          |
| octet      | $\alpha\alpha\alpha\beta$        | -3366.2098               | -3366.1853 | -3366.1940 |
|            | $\alpha\alpha\beta\alpha$        | \                        | \          | \          |
|            | $\alpha\beta\alpha\alpha$        | -3366.2249               | -3366.1856 | -3366.2166 |
|            | $\beta\alpha\alpha\alpha$        | -3366.2169               | -3366.1845 | -3366.2061 |
| 12-et      | $\alpha\alpha\alpha\alpha\beta$  | \                        | \          | \          |
| 14-et      | $\alpha\alpha\alpha\alpha\alpha$ | -3366.2165               | -3366.1852 | -3366.2028 |

| Spin state | Spin topology<br>(Mn1~Mn4-OX)    | Relative Gibbs Free energy (kcal/mol) |                            |                        |                        |
|------------|----------------------------------|---------------------------------------|----------------------------|------------------------|------------------------|
|            |                                  | $\Delta G^\ddagger(\text{Rea-TS})$    | $\Delta G(\text{Rea-Pro})$ | $\Delta G(\text{Rea})$ | $\Delta G(\text{Pro})$ |
| doublet    | $\alpha\alpha\beta\beta\alpha$   | \                                     | \                          | \                      | \                      |
|            | $\alpha\beta\alpha\beta\alpha$   | 16.0                                  | 4.4                        | 9.3                    | 8.5                    |
|            | $\alpha\beta\beta\alpha\alpha$   | \                                     | \                          | \                      | \                      |
|            | $\beta\alpha\alpha\beta\alpha$   | 15.9                                  | 10.7                       | 10.1                   | 15.6                   |
|            | $\beta\alpha\beta\alpha\alpha$   | \                                     | \                          | \                      | \                      |
|            | $\beta\beta\alpha\alpha\alpha$   | 25.6                                  | 4.5                        | 1.2                    | 0.4                    |
| sextet     | $\alpha\alpha\alpha\beta\beta$   | \                                     | \                          | \                      | \                      |
|            | $\alpha\alpha\beta\alpha\beta$   | 15.5                                  | 9.9                        | 9.4                    | 14.1                   |
|            | $\alpha\beta\alpha\alpha\beta$   | \                                     | \                          | \                      | \                      |
|            | $\beta\alpha\alpha\alpha\beta$   | \                                     | \                          | \                      | \                      |
| octet      | $\alpha\alpha\alpha\beta\alpha$  | 15.4                                  | 9.9                        | 9.5                    | 14.2                   |
|            | $\alpha\alpha\beta\alpha\alpha$  | \                                     | \                          | \                      | \                      |
|            | $\alpha\beta\alpha\alpha\alpha$  | 24.7                                  | 5.2                        | 0.0                    | 0.0                    |
|            | $\beta\alpha\alpha\alpha\alpha$  | 20.3                                  | 6.8                        | 5.0                    | 6.6                    |
| 12-et      | $\alpha\alpha\alpha\alpha\beta$  | \                                     | \                          | \                      | \                      |
| 14-et      | $\alpha\alpha\alpha\alpha\alpha$ | 19.6                                  | 8.6                        | 5.3                    | 8.7                    |

| Spin state   | Spin topology<br>(Mn1~Mn4-OX) | Mulliken spin density |       |       |
|--------------|-------------------------------|-----------------------|-------|-------|
|              |                               | Rea                   | TS    | Pro   |
| doublet      | $\alpha$ Mn1                  | \                     | \     | \     |
|              | $\alpha$ Mn2                  | \                     | \     | \     |
|              | $\beta$ Mn3                   | \                     | \     | \     |
|              | $\beta$ Mn4                   | \                     | \     | \     |
|              | $\alpha$ O7                   | \                     | \     | \     |
|              | $\alpha$ Mn1                  | 2.94                  | 2.94  | 2.93  |
|              | $\beta$ Mn2                   | -2.92                 | -2.91 | -2.88 |
|              | $\alpha$ Mn3                  | 2.88                  | 3.49  | 3.81  |
|              | $\beta$ Mn4                   | -2.29                 | -2.85 | -2.77 |
|              | $\alpha$ O7                   | 0.14                  | 0.37  | 0.00  |
|              | O4                            | 0.10                  | -0.07 | -0.12 |
|              | O6                            | 0.11                  | -0.02 | -0.02 |
|              | $\alpha$ Mn1                  | \                     | \     | \     |
|              | $\beta$ Mn2                   | \                     | \     | \     |
|              | $\beta$ Mn3                   | \                     | \     | \     |
|              | $\alpha$ Mn4                  | \                     | \     | \     |
|              | $\alpha$ O7                   | \                     | \     | \     |
|              | $\beta$ Mn1                   | -2.93                 | -2.93 | -2.91 |
| $\alpha$ Mn2 | 2.93                          | 2.96                  | 2.95  |       |
| $\alpha$ Mn3 | 2.89                          | 3.51                  | 3.81  |       |
| $\beta$ Mn4  | -2.34                         | -2.84                 | -2.76 |       |

|        |          |     |       |       |       |
|--------|----------|-----|-------|-------|-------|
|        | $\alpha$ | O7  | 0.13  | 0.36  | 0.00  |
|        |          | O4  | 0.13  | -0.09 | -0.13 |
|        |          | O1  | -0.01 | -0.02 | -0.10 |
|        | $\beta$  | Mn1 | \     | \     | \     |
|        | $\alpha$ | Mn2 | \     | \     | \     |
|        | $\beta$  | Mn3 | \     | \     | \     |
|        | $\alpha$ | Mn4 | \     | \     | \     |
|        | $\alpha$ | O7  | \     | \     | \     |
|        | $\beta$  | Mn1 | -2.96 | -2.95 | -2.93 |
|        | $\beta$  | Mn2 | -2.91 | -2.93 | -2.91 |
|        | $\alpha$ | Mn3 | 2.73  | 3.55  | 3.86  |
|        | $\alpha$ | Mn4 | 2.92  | 2.89  | 2.91  |
|        | $\alpha$ | O7  | 0.06  | 0.38  | 0.00  |
|        |          | O2  | 0.59  | -0.01 | -0.04 |
|        |          | O5  | 0.41  | 0.04  | 0.01  |
|        |          | O4  | 0.17  | 0.04  | 0.08  |
|        | $\alpha$ | Mn1 | \     | \     | \     |
|        | $\alpha$ | Mn2 | \     | \     | \     |
|        | $\alpha$ | Mn3 | \     | \     | \     |
|        | $\beta$  | Mn4 | \     | \     | \     |
|        | $\beta$  | O7  | \     | \     | \     |
|        | $\alpha$ | Mn1 | 2.95  | 2.95  | 2.92  |
|        | $\alpha$ | Mn2 | 2.94  | 2.93  | 2.89  |
|        | $\beta$  | Mn3 | -2.87 | -3.47 | -3.79 |
|        | $\alpha$ | Mn4 | 2.33  | 2.84  | 2.77  |
|        | $\beta$  | O7  | -0.13 | -0.37 | 0.00  |
| sextet |          | O4  | -0.13 | 0.08  | 0.13  |
|        |          | O1  | 0.04  | 0.05  | 0.10  |
|        | $\alpha$ | Mn1 | \     | \     | \     |
|        | $\beta$  | Mn2 | \     | \     | \     |
|        | $\alpha$ | Mn3 | \     | \     | \     |
|        | $\alpha$ | Mn4 | \     | \     | \     |
|        | $\beta$  | O7  | \     | \     | \     |
|        | $\beta$  | Mn1 | \     | \     | \     |
|        | $\alpha$ | Mn2 | \     | \     | \     |
|        | $\alpha$ | Mn3 | \     | \     | \     |
|        | $\alpha$ | Mn4 | \     | \     | \     |
|        | $\beta$  | O7  | \     | \     | \     |
|        | $\alpha$ | Mn1 | 2.96  | 2.97  | 2.95  |
|        | $\alpha$ | Mn2 | 2.96  | 2.98  | 2.96  |
|        | $\alpha$ | Mn3 | 2.90  | 3.52  | 3.83  |
| octet  | $\beta$  | Mn4 | -2.28 | -2.85 | -2.76 |
|        | $\alpha$ | O7  | 0.14  | 0.37  | 0.00  |
|        |          | O4  | 0.10  | -0.08 | -0.13 |

|       |          |     |       |       |       |
|-------|----------|-----|-------|-------|-------|
|       | $\alpha$ | Mn1 | \     | \     | \     |
|       | $\alpha$ | Mn2 | \     | \     | \     |
|       | $\beta$  | Mn3 | \     | \     | \     |
|       | $\alpha$ | Mn4 | \     | \     | \     |
|       | $\alpha$ | O7  | \     | \     | \     |
|       | $\alpha$ | Mn1 | 2.95  | 2.94  | 2.94  |
|       | $\beta$  | Mn2 | -2.87 | -2.91 | -2.89 |
|       | $\alpha$ | Mn3 | 2.73  | 3.57  | 3.88  |
|       | $\alpha$ | Mn4 | 2.92  | 2.88  | 2.90  |
|       | $\alpha$ | O7  | 0.06  | 0.38  | 0.00  |
|       |          | O2  | 0.60  | -0.01 | -0.03 |
|       |          | O4  | 0.18  | 0.05  | 0.09  |
|       |          | O5  | 0.40  | 0.04  | 0.01  |
|       | $\beta$  | Mn1 | -2.93 | -2.93 | -2.92 |
|       | $\alpha$ | Mn2 | 2.92  | 2.96  | 2.96  |
|       | $\alpha$ | Mn3 | 2.85  | 3.60  | 3.89  |
|       | $\alpha$ | Mn4 | 2.87  | 2.88  | 2.90  |
|       | $\alpha$ | O7  | 0.05  | 0.38  | 0.00  |
|       |          | O4  | 0.62  | 0.04  | 0.08  |
|       |          | O5  | 0.45  | 0.03  | 0.00  |
| 12-et | $\alpha$ | Mn1 | \     | \     | \     |
|       | $\alpha$ | Mn2 | \     | \     | \     |
|       | $\alpha$ | Mn3 | \     | \     | \     |
|       | $\alpha$ | Mn4 | \     | \     | \     |
|       | $\beta$  | O7  | \     | \     | \     |
| 14-et | $\alpha$ | Mn1 | 2.96  | 2.97  | 2.95  |
|       | $\alpha$ | Mn2 | 2.96  | 2.98  | 2.95  |
|       | $\alpha$ | Mn3 | 2.87  | 3.61  | 3.90  |
|       | $\alpha$ | Mn4 | 2.85  | 2.88  | 2.90  |
|       | $\alpha$ | O7  | 0.05  | 0.38  | 0.00  |
|       |          | O4  | 0.87  | 0.05  | 0.14  |
|       |          | O5  | 0.13  | 0.04  | 0.00  |
|       |          | O2  | 0.11  | 0.05  | 0.05  |

'\' denotes TSs for some spin states do not exist due to the failure of IRC verification on reactants concerning W2 returning back to Mn4. 'X' denotes atypism for the ascription of spin center.

**Rea:**

|    |             |             |             |   |             |             |             |
|----|-------------|-------------|-------------|---|-------------|-------------|-------------|
| Ca | 2.46768200  | 0.31356100  | -1.55276700 | O | 0.28207500  | -1.12060600 | -1.26866600 |
| Mn | 0.16405700  | 1.95921300  | 0.31528200  | O | -0.54064200 | -3.23262400 | -0.33673700 |
| Mn | 1.33546600  | -0.03762500 | 1.79389600  | O | 4.77215100  | 1.17131400  | -2.02091200 |
| Mn | -0.51086200 | -1.61486600 | 0.28630100  | H | 5.12446200  | 0.84059100  | -1.16882400 |
| Mn | -0.11172900 | -2.85213900 | -2.15336600 | H | 4.54818800  | 2.11181800  | -1.87449300 |
| O  | 1.81267700  | 1.25005100  | 0.63918500  | O | 1.57686400  | 0.27618900  | -3.83276400 |
| O  | -0.37248700 | 0.34371100  | 1.13090000  | H | 0.80895000  | 0.86953200  | -3.89062300 |
| O  | 1.30263300  | -1.50533100 | 0.72912500  | H | 1.19045300  | -0.64197300 | -3.94123800 |

|   |             |             |             |   |             |             |             |
|---|-------------|-------------|-------------|---|-------------|-------------|-------------|
| O | 0.31046700  | -2.07796800 | -3.77373300 | H | -6.72316100 | 0.66297900  | -2.37345100 |
| H | 0.10384800  | -2.73370900 | -4.46357800 | C | -6.56480200 | -0.95939900 | -0.97641500 |
| O | -0.64877200 | -4.39963100 | -2.88961400 | H | -7.19987800 | -1.08402200 | -0.09210200 |
| H | -0.03374900 | -5.08536500 | -2.56582500 | H | -6.99751800 | -1.55593700 | -1.78914800 |
| O | 3.01527800  | -1.91897500 | -2.17143700 | C | -5.13682600 | -1.42390400 | -0.64607500 |
| C | 2.76875500  | -3.11607000 | -1.96551500 | H | -4.75699700 | -0.83512600 | 0.19506800  |
| O | 1.59024400  | -3.65646800 | -1.89181700 | H | -5.19024700 | -2.46731700 | -0.30386200 |
| C | 3.92769900  | -4.09054300 | -1.75479900 | C | -4.16793500 | -1.31558300 | -1.82994000 |
| H | 4.63996500  | -3.90114200 | -2.56987200 | H | -4.16815600 | -0.28338100 | -2.21551600 |
| H | 4.43326500  | -3.75468700 | -0.83701500 | H | -4.45640200 | -1.97107400 | -2.66053500 |
| C | 3.56473700  | -5.57262400 | -1.66417700 | C | -2.71959800 | -1.62889000 | -1.47467400 |
| H | 3.08415200  | -5.92151100 | -2.58688000 | O | -2.31902900 | -1.24991300 | -0.31895000 |
| H | 2.87251200  | -5.76050000 | -0.83560100 | O | -2.01860200 | -2.18901400 | -2.36001800 |
| H | 4.46710800  | -6.17692900 | -1.50352200 | O | 0.10382200  | 2.86096100  | 2.11342800  |
| O | 0.87229200  | 3.62888200  | -0.33032900 | C | 0.68865000  | 2.42452200  | 3.15537700  |
| C | 1.93356000  | 3.77444700  | -1.06602200 | O | 1.25690300  | 1.29621800  | 3.26156300  |
| O | 2.63886600  | 2.85535200  | -1.52455700 | C | 0.71747500  | 3.35373300  | 4.36095300  |
| C | 2.26606400  | 5.23735400  | -1.35482600 | H | -0.26566100 | 3.83915200  | 4.42190100  |
| H | 1.42264700  | 5.65039900  | -1.93047900 | H | 1.42783100  | 4.15607400  | 4.10725500  |
| H | 2.25497200  | 5.77659500  | -0.39642400 | C | 1.10435000  | 2.68492900  | 5.68056100  |
| C | 3.58481300  | 5.45981500  | -2.09946000 | H | 1.12362300  | 3.42641900  | 6.48910700  |
| H | 3.57163900  | 4.88680700  | -3.03638800 | H | 0.38835100  | 1.89989000  | 5.95298700  |
| H | 4.41151500  | 5.04895800  | -1.50170600 | H | 2.09306300  | 2.21889400  | 5.61113900  |
| C | 3.84694500  | 6.94118200  | -2.39317800 | O | 4.15429100  | -0.19984200 | 0.28140200  |
| H | 3.05144400  | 7.37074400  | -3.01831300 | C | 4.18159500  | -0.39329100 | 1.51364100  |
| H | 3.89423600  | 7.53121200  | -1.46709200 | O | 3.15084900  | -0.41945300 | 2.29974100  |
| H | 4.79773000  | 7.07764400  | -2.92438400 | C | 5.50224300  | -0.61611800 | 2.23175700  |
| N | -1.81213000 | 2.56714700  | 0.15424300  | H | 5.70359100  | 0.23585300  | 2.89444600  |
| C | -2.49061000 | 2.88992700  | -1.00065700 | H | 6.31823500  | -0.72132900 | 1.51129300  |
| H | -1.95681600 | 3.03719500  | -1.92886900 | H | 5.43839900  | -1.50994300 | 2.86301800  |
| C | -3.83876500 | 2.94129600  | -0.73689900 | O | 0.63311400  | -1.25729400 | 3.24770100  |
| N | -3.95464500 | 2.65565600  | 0.61907300  | C | -0.41210700 | -1.97122800 | 3.14810200  |
| H | -4.83715600 | 2.40040500  | 1.07388900  | O | -1.08542600 | -2.16275700 | 2.08448800  |
| C | -2.71861200 | 2.41883500  | 1.11013500  | C | -0.91247800 | -2.66168300 | 4.40650800  |
| H | -2.50988800 | 2.11027000  | 2.12371600  | H | -0.22098500 | -2.43209500 | 5.22512000  |
| C | -5.00197200 | 3.23677300  | -1.64810100 | H | -1.88885400 | -2.21720500 | 4.65492000  |
| H | -5.01737000 | 4.30656400  | -1.90507500 | C | -1.07577200 | -4.18144200 | 4.22222300  |
| H | -4.83415200 | 2.70590700  | -2.59579100 | H | -0.10244900 | -4.61797000 | 3.95403700  |
| C | -6.40570500 | 2.87695100  | -1.09826500 | H | -1.74451200 | -4.36428000 | 3.37173000  |
| H | -6.68519600 | 3.56595800  | -0.29317700 | C | -1.61793200 | -4.86116000 | 5.48356300  |
| H | -7.13627800 | 3.01033700  | -1.90784800 | H | -0.94914800 | -4.70736500 | 6.34189700  |
| C | -6.49243700 | 1.46975200  | -0.50810800 | H | -1.72296000 | -5.94315400 | 5.33211800  |
| O | -6.37796300 | 1.28004000  | 0.71094500  | H | -2.60605900 | -4.46429500 | 5.75627800  |
| N | -6.64319500 | 0.44767600  | -1.38751400 | O | 0.07910800  | 1.43519200  | -1.42058200 |

|            |             |             |             |   |             |             |             |
|------------|-------------|-------------|-------------|---|-------------|-------------|-------------|
| H          | -0.27146300 | 0.51120800  | -1.44157500 |   |             |             |             |
| <b>TS:</b> |             |             |             |   |             |             |             |
| Ca         | -2.59957700 | 0.39225500  | -1.17620400 | H | -6.04623400 | -5.73478900 | -3.50720100 |
| Mn         | -0.50164400 | -1.96122700 | 0.07829100  | N | 1.37595000  | -2.77893200 | -0.38697000 |
| Mn         | -1.29343900 | -0.05554600 | 1.90897700  | C | 1.97982600  | -2.86855800 | -1.62298700 |
| Mn         | 0.57679700  | 1.38323700  | 0.45089800  | H | 1.41014200  | -2.69983300 | -2.52634300 |
| Mn         | 0.61777500  | 3.25467700  | -1.71019700 | C | 3.31174700  | -3.17298800 | -1.46144000 |
| O          | -2.00464100 | -1.17077100 | 0.65636300  | N | 3.49221500  | -3.28383100 | -0.08841600 |
| O          | 0.33644900  | -0.52338200 | 1.01569000  | H | 4.41052800  | -3.29446600 | 0.36761000  |
| O          | -1.20180700 | 1.38147500  | 0.83626100  | C | 2.31358000  | -3.02264500 | 0.51773300  |
| O          | -0.02354500 | 1.45655400  | -1.61132400 | H | 2.16922500  | -2.98731700 | 1.58703100  |
| O          | 0.71443200  | 3.17867300  | 0.02512000  | C | 4.40547800  | -3.36702500 | -2.48070800 |
| O          | -4.98983900 | -0.11882500 | -1.75890500 | H | 4.24314000  | -4.30500100 | -3.03241900 |
| H          | -5.30390100 | 0.01060500  | -0.84144400 | H | 4.32359500  | -2.56516000 | -3.22832700 |
| H          | -4.84726700 | -1.08167900 | -1.86238400 | C | 5.85387600  | -3.40551200 | -1.92852300 |
| O          | -2.02987300 | -0.02468500 | -3.58374300 | H | 6.01689000  | -4.32657400 | -1.35747000 |
| H          | -1.52249700 | -0.82347700 | -3.33396600 | H | 6.54537000  | -3.42577000 | -2.78198000 |
| H          | -1.33460600 | 0.64566900  | -3.76308700 | C | 6.18140000  | -2.24856200 | -0.98523600 |
| O          | 0.15505800  | 1.75024800  | -3.31815900 | O | 6.09322900  | -2.37975800 | 0.24344500  |
| H          | 1.07408500  | 1.41859300  | -3.40396200 | N | 6.51304400  | -1.06512600 | -1.56133900 |
| O          | 1.36652700  | 4.73194600  | -2.37024600 | H | 6.56593600  | -1.01356400 | -2.57098200 |
| H          | 0.68230600  | 5.42874200  | -2.37232500 | C | 6.64070300  | 0.17184900  | -0.78173800 |
| O          | -2.72088500 | 2.68396400  | -1.77853300 | H | 7.22243300  | -0.06277700 | 0.11609500  |
| C          | -2.28447300 | 3.84224700  | -1.78839500 | H | 7.22207500  | 0.87890400  | -1.38662200 |
| O          | -1.03200500 | 4.19278000  | -1.83649800 | C | 5.28506600  | 0.77199500  | -0.37177000 |
| C          | -3.27220800 | 5.00794400  | -1.74670600 | H | 4.74642100  | 0.04708600  | 0.24761000  |
| H          | -4.05231400 | 4.77919300  | -2.48551000 | H | 5.47539600  | 1.64936100  | 0.26247900  |
| H          | -3.76682500 | 4.94072900  | -0.76571800 | C | 4.41611300  | 1.17627200  | -1.56779400 |
| C          | -2.69003800 | 6.40470200  | -1.96207400 | H | 4.31572600  | 0.32024300  | -2.25570100 |
| H          | -2.21221300 | 6.49005900  | -2.94623100 | H | 4.86444300  | 1.99536200  | -2.14345400 |
| H          | -1.93822000 | 6.64231600  | -1.20059800 | C | 2.99285500  | 1.58726400  | -1.20376700 |
| H          | -3.48405700 | 7.16050800  | -1.90607500 | O | 2.44865000  | 1.02653000  | -0.20810200 |
| O          | -1.47025100 | -3.38840300 | -0.74866500 | O | 2.44622900  | 2.43846500  | -1.97949400 |
| C          | -2.59642600 | -3.25025400 | -1.39132800 | O | -0.36852800 | -3.10556800 | 1.69440400  |
| O          | -3.15026400 | -2.17189200 | -1.66730900 | C | -0.80221000 | -2.77488800 | 2.85285900  |
| C          | -3.20602100 | -4.58626500 | -1.81251500 | O | -1.21270000 | -1.63013800 | 3.18228200  |
| H          | -2.45885500 | -5.10435700 | -2.43336600 | C | -0.82298400 | -3.88488900 | 3.89519800  |
| H          | -3.30686700 | -5.20232000 | -0.90636900 | H | 0.12124000  | -4.43898600 | 3.80375300  |
| C          | -4.54142100 | -4.47316400 | -2.55199400 | H | -1.60785800 | -4.58805300 | 3.57607600  |
| H          | -4.41503800 | -3.82469700 | -3.42966100 | C | -1.06522000 | -3.41153000 | 5.32856500  |
| H          | -5.27210900 | -3.96880900 | -1.90356700 | H | -1.08876800 | -4.26942900 | 6.01232600  |
| C          | -5.08793700 | -5.83903000 | -2.98220700 | H | -0.27305600 | -2.72948000 | 5.66046200  |
| H          | -4.39107300 | -6.35265500 | -3.65950800 | H | -2.01625500 | -2.87431100 | 5.41004600  |
| H          | -5.25144300 | -6.49596000 | -2.11630300 | O | -4.18864200 | 0.68326400  | 0.72995100  |

|   |             |             |            |   |             |             |             |
|---|-------------|-------------|------------|---|-------------|-------------|-------------|
| C | -4.08695100 | 0.64567300  | 1.97324100 | H | 1.17669400  | 1.31306700  | 5.41125800  |
| O | -3.00143100 | 0.40219900  | 2.63571000 | C | 2.46921300  | 2.88652400  | 4.61721300  |
| C | -5.29799700 | 0.89408200  | 2.85615600 | H | 2.39279600  | 3.69306300  | 3.87614500  |
| H | -5.50680800 | -0.00210800 | 3.45413000 | H | 3.24487900  | 2.20386400  | 4.24279300  |
| H | -6.17072500 | 1.14716400  | 2.24793500 | C | 2.88645200  | 3.45727400  | 5.97734500  |
| H | -5.08167100 | 1.70870900  | 3.55769700 | H | 2.14050400  | 4.16926700  | 6.35779300  |
| O | -0.43488700 | 0.87925800  | 3.43071000 | H | 3.84546100  | 3.98672300  | 5.90680300  |
| C | 0.63962000  | 1.56231800  | 3.37112600 | H | 2.99842100  | 2.66308800  | 6.72919900  |
| O | 1.30417200  | 1.78775900  | 2.31853700 | O | -0.47999800 | -1.13879400 | -1.56471500 |
| C | 1.13318700  | 2.14225400  | 4.68954500 | H | 0.16669000  | -0.40343600 | -1.56161800 |
| H | 0.33515500  | 2.80660400  | 5.05581000 |   |             |             |             |

**Pro:**

|    |             |             |             |   |             |             |             |
|----|-------------|-------------|-------------|---|-------------|-------------|-------------|
| Ca | -2.51096000 | 0.15609400  | -1.23314800 | O | -2.60733800 | -2.40854200 | -1.93996900 |
| Mn | -0.19298900 | -1.99961400 | 0.07609000  | C | -2.28568800 | -4.77768600 | -2.30749900 |
| Mn | -1.38399000 | -0.37119100 | 1.92876400  | H | -1.41908700 | -5.13803000 | -2.88292400 |
| Mn | 0.40003100  | 1.29365200  | 0.65407800  | H | -2.38412900 | -5.47817700 | -1.46426900 |
| Mn | 0.21358800  | 3.47605100  | -1.58461600 | C | -3.54958700 | -4.77760000 | -3.17082100 |
| O  | -1.82695200 | -1.50746200 | 0.55484900  | H | -3.43626500 | -4.04129500 | -3.97828900 |
| O  | 0.38193200  | -0.60107000 | 1.22429900  | H | -4.40053100 | -4.43559000 | -2.56474100 |
| O  | -1.41620700 | 1.06169900  | 0.87419400  | C | -3.85565000 | -6.15963800 | -3.75873100 |
| O  | -0.25946400 | 1.76884200  | -2.18438600 | H | -3.03399800 | -6.51292300 | -4.39778200 |
| O  | 0.19337300  | 3.03616700  | 0.08720800  | H | -4.00345900 | -6.90791400 | -2.96730100 |
| O  | -4.74190500 | -0.64356600 | -2.06478100 | H | -4.76677900 | -6.13716100 | -4.37043300 |
| H  | -5.13365300 | -0.66155800 | -1.16822600 | N | 1.81599300  | -2.47919200 | -0.30026500 |
| H  | -4.43494300 | -1.55581900 | -2.24314100 | C | 2.48631600  | -2.67143200 | -1.48873300 |
| O  | -1.80573600 | -0.18212800 | -3.64906300 | H | 1.94736000  | -2.76286200 | -2.42238900 |
| H  | -1.11265300 | -0.78531900 | -3.31099000 | C | 3.84096200  | -2.72288300 | -1.24751800 |
| H  | -1.31274400 | 0.61702000  | -3.92406300 | N | 3.96603900  | -2.57827700 | 0.12830400  |
| O  | -0.07136000 | 2.13028100  | -3.58855100 | H | 4.85189600  | -2.39542300 | 0.61071400  |
| H  | 0.89607700  | 1.99584600  | -3.69193200 | C | 2.73317700  | -2.41518600 | 0.65419300  |
| O  | 0.85278100  | 5.10033700  | -1.96743400 | H | 2.53099200  | -2.21497000 | 1.69616500  |
| H  | 0.11080200  | 5.73406700  | -1.93644100 | C | 5.00402700  | -2.88415100 | -2.19366500 |
| O  | -2.96317200 | 2.48338800  | -1.57039200 | H | 5.01287200  | -3.90249100 | -2.60976900 |
| C  | -2.70946600 | 3.69307200  | -1.63606200 | H | 4.84328800  | -2.21529300 | -3.05140000 |
| O  | -1.52478300 | 4.23430800  | -1.71169200 | C | 6.41010000  | -2.62025200 | -1.59540800 |
| C  | -3.86617200 | 4.69255700  | -1.63490400 | H | 6.68539700  | -3.42501800 | -0.90466200 |
| H  | -4.57899400 | 4.34023700  | -2.39344400 | H | 7.13982100  | -2.63251900 | -2.41662100 |
| H  | -4.37519800 | 4.55620100  | -0.66895900 | C | 6.50771400  | -1.31952600 | -0.79771700 |
| C  | -3.50229100 | 6.16095100  | -1.85312400 | O | 6.42492300  | -1.31932900 | 0.43833500  |
| H  | -3.01071600 | 6.31021300  | -2.82243800 | N | 6.62395700  | -0.16999400 | -1.50917300 |
| H  | -2.82182400 | 6.52091100  | -1.07254500 | H | 6.68155400  | -0.22439400 | -2.51846700 |
| H  | -4.40581100 | 6.78397400  | -1.83168100 | C | 6.52017300  | 1.14993400  | -0.87614300 |
| O  | -0.81718200 | -3.44633500 | -1.01750600 | H | 7.15737800  | 1.14383100  | 0.01499900  |
| C  | -1.91185600 | -3.41629300 | -1.72456600 | H | 6.93328700  | 1.88044900  | -1.58255700 |



|   |             |             |             |   |             |             |             |
|---|-------------|-------------|-------------|---|-------------|-------------|-------------|
| C | 5.08376700  | 1.52579600  | -0.47290800 | O | -3.18871800 | -0.21377300 | 2.52877700  |
| H | 4.72173200  | 0.81339800  | 0.27611200  | C | -5.54273800 | -0.08030100 | 2.58548500  |
| H | 5.11605400  | 2.51267300  | 0.01056400  | H | -5.65707400 | -1.03334300 | 3.11746100  |
| C | 4.11185900  | 1.56170400  | -1.66253200 | H | -6.39709800 | 0.08013400  | 1.92217200  |
| H | 4.09927400  | 0.57193800  | -2.14504000 | H | -5.50323000 | 0.71133100  | 3.34331200  |
| H | 4.42265400  | 2.30243900  | -2.40883400 | O | -0.76447700 | 0.61279000  | 3.51859300  |
| C | 2.67480300  | 1.86971200  | -1.25482800 | C | 0.21635600  | 1.43438600  | 3.58957600  |
| O | 2.15659600  | 1.12674500  | -0.36036400 | O | 0.94861800  | 1.78761700  | 2.62483300  |
| O | 2.11079900  | 2.82475500  | -1.87569000 | C | 0.48126500  | 2.00559200  | 4.97692900  |
| O | -0.04358000 | -3.26092000 | 1.57940500  | H | -0.45658400 | 2.47441900  | 5.31144100  |
| C | -0.58749500 | -3.07676900 | 2.72796200  | H | 0.63625700  | 1.15165900  | 5.65399000  |
| O | -1.17005500 | -2.02815800 | 3.10887000  | C | 1.64702300  | 2.99424500  | 5.06122900  |
| C | -0.50901000 | -4.26087500 | 3.68303300  | H | 1.46844300  | 3.82256100  | 4.36251200  |
| H | 0.51920200  | -4.64611500 | 3.64239300  | H | 2.56638900  | 2.50131600  | 4.71592900  |
| H | -1.13608600 | -5.05203100 | 3.24404000  | C | 1.84500400  | 3.53672300  | 6.48121300  |
| C | -0.94086500 | -3.95321200 | 5.11681300  | H | 0.94818700  | 4.06356200  | 6.83667100  |
| H | -0.87406600 | -4.85721500 | 5.73533800  | H | 2.68390400  | 4.24368500  | 6.52195800  |
| H | -0.30419900 | -3.18140600 | 5.56585500  | H | 2.05622300  | 2.72713300  | 7.19440400  |
| H | -1.97229200 | -3.58557200 | 5.14717200  | O | -0.18076700 | -0.88441000 | -1.42353100 |
| O | -4.26320700 | 0.00475700  | 0.54822300  | H | 0.64232000  | -0.36231000 | -1.43471100 |
| C | -4.24699900 | -0.09291500 | 1.79206500  |   |             |             |             |

**Table S23** Reaction parameters for the open-cubane W2 (hydroxyl/oxyl)-O5 (oxo) nucleophilic attack with deprotonated W2:

| Spin state | Spin topology<br>(Mn1~Mn4-O7)    | Gibbs Free energy (a.u.) |            |            |
|------------|----------------------------------|--------------------------|------------|------------|
|            |                                  | Rea                      | TS         | Pro        |
| doublet    | $\alpha\alpha\beta\alpha$        | -3366.2136               | -3366.1462 | -3366.1662 |
|            | $\alpha\beta\alpha\alpha$        | -3366.2144               | -3366.1790 | -3366.2124 |
|            | $\alpha\beta\beta\alpha\alpha$   | -3366.2050               | -3366.1492 | -3366.1663 |
|            | $\beta\alpha\alpha\beta\alpha$   | -3366.2141               | -3366.1776 | -3366.2104 |
|            | $\beta\alpha\beta\alpha\alpha$   | -3366.2047               | -3366.1626 | -3366.2037 |
|            | $\beta\beta\alpha\alpha\alpha$   | -3366.2036               | -3366.1696 | -3366.2117 |
| sextet     | $\alpha\alpha\alpha\beta\beta$   | -3366.2060               | -3366.1647 | -3366.2042 |
|            | $\alpha\alpha\beta\alpha\beta$   | -3366.2172               | -3366.1863 | -3366.2197 |
|            | $\alpha\beta\alpha\alpha\beta$   | -3366.2180               | -3366.1554 | -3366.1649 |
|            | $\beta\alpha\alpha\alpha\beta$   | -3366.2166               | -3366.1554 | -3366.1900 |
| octet      | $\alpha\alpha\alpha\beta\alpha$  | -3366.2188               | -3366.1791 | -3366.2125 |
|            | $\alpha\alpha\beta\alpha\alpha$  | -3366.2067               | -3366.1506 | -3366.1674 |
|            | $\alpha\beta\alpha\alpha\alpha$  | -3366.2053               | -3366.1705 | -3366.2130 |
|            | $\beta\alpha\alpha\alpha\alpha$  | -3366.2050               | -3366.1793 | -3366.2112 |
| 12-et      | $\alpha\alpha\alpha\alpha\beta$  | -3366.2196               | -3366.1492 | -3366.1903 |
| 14-et      | $\alpha\alpha\alpha\alpha\alpha$ | -3366.2062               | -3366.1705 | -3366.2123 |

| Spin state | Spin topology<br>(Mn1~Mn4-O7)    | Relative Gibbs Free energy (kcal/mol) |                            |                        |                        |
|------------|----------------------------------|---------------------------------------|----------------------------|------------------------|------------------------|
|            |                                  | $\Delta G^\ddagger(\text{Rea-TS})$    | $\Delta G(\text{Rea-Pro})$ | $\Delta G(\text{Rea})$ | $\Delta G(\text{Pro})$ |
| doublet    | $\alpha\alpha\beta\beta\alpha$   | 42.3                                  | 29.7                       | 3.8                    | 33.6                   |
|            | $\alpha\beta\alpha\beta\alpha$   | 22.2                                  | 1.3                        | 3.3                    | 4.6                    |
|            | $\alpha\beta\beta\alpha\alpha$   | 35.0                                  | 24.3                       | 9.2                    | 33.5                   |
|            | $\beta\alpha\alpha\beta\alpha$   | 22.9                                  | 2.3                        | 3.5                    | 5.8                    |
|            | $\beta\alpha\beta\alpha\alpha$   | 26.4                                  | 0.6                        | 9.3                    | 10.0                   |
|            | $\beta\beta\alpha\alpha\alpha$   | 21.3                                  | -5.1                       | 10.0                   | 5.0                    |
| sextet     | $\alpha\alpha\alpha\beta\beta$   | 25.9                                  | 1.1                        | 8.5                    | 9.7                    |
|            | $\alpha\alpha\beta\alpha\beta$   | 19.4                                  | -1.6                       | 1.5                    | 0.0                    |
|            | $\alpha\beta\alpha\alpha\beta$   | 39.3                                  | 33.3                       | 1.0                    | 34.4                   |
|            | $\beta\alpha\alpha\alpha\beta$   | 38.4                                  | 16.7                       | 1.9                    | 18.6                   |
| octet      | $\alpha\alpha\alpha\beta\alpha$  | 24.9                                  | 4.0                        | 0.5                    | 4.5                    |
|            | $\alpha\alpha\beta\alpha\alpha$  | 35.2                                  | 24.7                       | 8.1                    | 32.8                   |
|            | $\alpha\beta\alpha\alpha\alpha$  | 21.8                                  | -4.8                       | 9.0                    | 4.2                    |
|            | $\beta\alpha\alpha\alpha\alpha$  | 20.1                                  | -3.9                       | 9.2                    | 5.3                    |
| 12-et      | $\alpha\alpha\alpha\alpha\beta$  | 44.2                                  | 18.4                       | 0.0                    | 18.4                   |
| 14-et      | $\alpha\alpha\alpha\alpha\alpha$ | 22.4                                  | -3.8                       | 8.4                    | 4.6                    |

| Spin state  | Spin topology<br>(Mn1~Mn4-O7) | Mulliken spin density |       |       |
|-------------|-------------------------------|-----------------------|-------|-------|
|             |                               | Rea                   | TS    | Pro   |
| doublet     | $\alpha$ Mn1                  | 2.96                  | 2.97  | 3.01  |
|             | $\alpha$ Mn2                  | 2.94                  | 2.97  | 2.93  |
|             | $\beta$ Mn3                   | -2.89                 | -2.46 | -1.95 |
|             | $\beta$ Mn4                   | -2.71                 | -2.77 | -2.85 |
|             | $\alpha$ O7                   | 0.76                  | 0.32  | 0.00  |
|             | $\alpha$ Mn1                  | 2.96                  | 2.96  | 2.97  |
|             | $\beta$ Mn2                   | -2.91                 | -2.91 | -2.89 |
|             | $\alpha$ Mn3                  | 2.88                  | 3.52  | 3.81  |
|             | $\beta$ Mn4                   | -2.68                 | -2.80 | -2.84 |
|             | $\alpha$ O7                   | 0.80                  | 0.45  | 0.02  |
|             | $\alpha$ Mn1                  | 2.95                  | 2.98  | 2.96  |
|             | $\beta$ Mn2                   | -2.94                 | -2.94 | -2.93 |
|             | $\beta$ Mn3                   | -2.92                 | -2.35 | -1.97 |
|             | $\alpha$ Mn4                  | 2.75                  | 2.95  | 2.91  |
|             | $\alpha$ O7                   | 1.01                  | 0.40  | 0.01  |
|             | $\beta$ Mn1                   | -2.95                 | -2.96 | -2.94 |
|             | $\alpha$ Mn2                  | 2.94                  | 2.96  | 2.96  |
|             | $\alpha$ Mn3                  | 2.91                  | 3.55  | 3.83  |
|             | $\beta$ Mn4                   | -2.68                 | -2.81 | -2.83 |
|             | $\alpha$ O7                   | 0.80                  | 0.44  | 0.02  |
| $\beta$ Mn1 | -2.96                         | -2.96                 | -2.95 |       |

|  |          |     |       |       |       |
|--|----------|-----|-------|-------|-------|
|  | $\alpha$ | Mn2 | 2.91  | 2.93  | 2.93  |
|  | $\beta$  | Mn3 | -2.89 | -2.79 | -2.73 |
|  | $\alpha$ | Mn4 | 2.75  | 3.13  | 3.80  |
|  | $\alpha$ | O7  | 1.01  | 0.66  | -0.03 |
|  | $\beta$  | Mn1 | -2.96 | -2.97 | -2.95 |
|  | $\beta$  | Mn2 | -2.94 | -2.93 | -2.91 |
|  | $\alpha$ | Mn3 | 2.90  | 3.48  | 3.85  |
|  | $\alpha$ | Mn4 | 2.80  | 2.84  | 2.90  |
|  | $\alpha$ | O7  | 1.02  | 0.58  | 0.00  |
|  | $\alpha$ | Mn1 | 2.97  | 2.97  | 2.97  |
|  | $\alpha$ | Mn2 | 2.96  | 2.98  | 2.96  |
|  | $\alpha$ | Mn3 | 2.92  | 2.82  | 2.77  |
|  | $\beta$  | Mn4 | -2.75 | -3.12 | -3.79 |
|  | $\beta$  | O7  | -1.01 | -0.65 | 0.03  |
|  | $\alpha$ | Mn1 | 2.97  | 2.96  | 2.94  |
|  | $\alpha$ | Mn2 | 2.94  | 2.93  | 2.90  |
|  | $\beta$  | Mn3 | -2.88 | -3.49 | -3.80 |
|  | $\alpha$ | Mn4 | 2.67  | 2.81  | 2.84  |
|  | $\beta$  | O7  | -0.78 | -0.46 | -0.03 |
|  | $\alpha$ | Mn1 | 2.96  | 2.95  | 2.95  |
|  | $\beta$  | Mn2 | -2.91 | -2.92 | -2.92 |
|  | $\alpha$ | Mn3 | 2.89  | 2.38  | 1.95  |
|  | $\alpha$ | Mn4 | 2.71  | 2.88  | 2.85  |
|  | $\beta$  | O7  | -0.75 | -0.45 | 0.01  |
|  | $\beta$  | Mn1 | -2.95 | -2.97 | -2.94 |
|  | $\alpha$ | Mn2 | 2.94  | 2.93  | 2.94  |
|  | $\alpha$ | Mn3 | 2.92  | 2.40  | 3.90  |
|  | $\alpha$ | Mn4 | 2.71  | 2.87  | 1.92  |
|  | $\beta$  | O7  | -0.75 | -0.44 | -0.49 |
|  | $\alpha$ | Mn1 | 2.96  | 2.98  | 2.97  |
|  | $\alpha$ | Mn2 | 2.96  | 2.97  | 2.97  |
|  | $\alpha$ | Mn3 | 2.91  | 3.56  | 3.84  |
|  | $\beta$  | Mn4 | -2.69 | -2.81 | -2.84 |
|  | $\alpha$ | O7  | 0.80  | 0.44  | 0.03  |
|  | $\alpha$ | Mn1 | 2.96  | 2.99  | 2.97  |
|  | $\alpha$ | Mn2 | 2.94  | 2.95  | 2.93  |
|  | $\beta$  | Mn3 | -2.89 | -2.31 | -1.93 |
|  | $\alpha$ | Mn4 | 2.75  | 2.95  | 2.92  |
|  | $\alpha$ | O7  | 1.01  | 0.41  | 0.02  |
|  | $\alpha$ | Mn1 | 2.96  | 2.96  | 2.96  |
|  | $\beta$  | Mn2 | -2.91 | -2.91 | -2.89 |
|  | $\alpha$ | Mn3 | 2.90  | 3.49  | 3.86  |
|  | $\alpha$ | Mn4 | 2.80  | 2.84  | 2.89  |
|  | $\alpha$ | O7  | 1.01  | 0.58  | 0.00  |

|       |          |     |       |       |       |
|-------|----------|-----|-------|-------|-------|
|       | $\beta$  | Mn1 | -2.95 | -2.96 | -2.94 |
|       | $\alpha$ | Mn2 | 2.94  | 2.96  | 2.97  |
|       | $\alpha$ | Mn3 | 2.92  | 3.52  | 3.88  |
|       | $\alpha$ | Mn4 | 2.80  | 2.84  | 2.89  |
|       | $\alpha$ | O7  | 1.02  | 0.57  | 0.00  |
| 12-et | $\alpha$ | Mn1 | 2.98  | 2.97  | 2.94  |
|       | $\alpha$ | Mn2 | 2.96  | 2.91  | 2.94  |
|       | $\alpha$ | Mn3 | 2.93  | 2.44  | 3.90  |
|       | $\alpha$ | Mn4 | 2.71  | 2.79  | 1.90  |
|       | $\beta$  | O7  | -0.75 | -0.29 | -0.49 |
| 14-et | $\alpha$ | Mn1 | 2.98  | 2.98  | 2.97  |
|       | $\alpha$ | Mn2 | 2.96  | 2.98  | 2.97  |
|       | $\alpha$ | Mn3 | 2.93  | 3.53  | 3.89  |
|       | $\alpha$ | Mn4 | 2.80  | 2.84  | 2.89  |
|       | $\alpha$ | O7  | 1.02  | -0.57 | 0.01  |

**Rea:**

|    |             |             |             |   |             |             |             |
|----|-------------|-------------|-------------|---|-------------|-------------|-------------|
| Ca | 2.18086400  | 0.43712100  | -1.52923400 | H | 5.79135800  | -1.71405200 | -3.92980900 |
| Mn | -0.48287800 | 1.88973900  | 0.05549800  | H | 6.89702000  | -2.99461800 | -3.38043500 |
| Mn | 1.46394900  | 0.77384000  | 1.67673100  | O | -0.61571600 | 3.73295700  | -0.60865700 |
| Mn | 0.36534100  | -1.55329400 | 0.53411400  | C | -0.21611400 | 4.27288200  | -1.71248400 |
| Mn | 0.69483600  | -3.09886800 | -1.66129100 | O | 0.13066900  | 3.63508100  | -2.73585800 |
| O  | 1.30295800  | 1.96225600  | 0.30554700  | C | -0.19663900 | 5.79628200  | -1.69748400 |
| O  | -0.28527100 | 0.31226100  | 1.04807100  | H | -1.13918500 | 6.13591300  | -1.24454400 |
| O  | 1.94869700  | -0.69812100 | 0.73597400  | H | 0.59246300  | 6.09467200  | -0.98861000 |
| O  | 0.50926900  | -1.37713900 | -1.29220800 | C | 0.03178500  | 6.44649000  | -3.06492300 |
| O  | 0.89315700  | -3.21175000 | 0.15746600  | H | -0.75924300 | 6.12342000  | -3.75639100 |
| O  | 2.36214600  | 2.06721100  | -3.37744800 | H | 0.97335500  | 6.07316800  | -3.48882000 |
| H  | 1.75722900  | 2.83307900  | -3.25899400 | C | 0.06211300  | 7.97664000  | -2.98338600 |
| H  | 1.89480200  | 1.48559900  | -4.01579000 | H | -0.88312900 | 8.37608700  | -2.58936700 |
| O  | 0.80672600  | -0.17242700 | -3.79126900 | H | 0.86876200  | 8.32561900  | -2.32337500 |
| H  | 0.04243100  | 0.01475900  | -3.20645800 | H | 0.22551900  | 8.42282100  | -3.97289500 |
| H  | 0.79987000  | -1.16093500 | -3.86514300 | N | -2.54284700 | 1.59953300  | -0.13002400 |
| O  | 0.57893300  | -2.97744100 | -3.50997100 | C | -3.23124000 | 1.23424700  | -1.26717500 |
| O  | 0.89359100  | -5.25080300 | -1.53859100 | H | -2.72626900 | 1.17799100  | -2.22092300 |
| H  | 1.82382200  | -5.27860600 | -1.84468600 | C | -4.53957600 | 0.96446100  | -0.94272600 |
| H  | 0.94824100  | -5.26870800 | -0.55968100 | N | -4.62622800 | 1.18755900  | 0.42677400  |
| O  | 3.51868500  | -1.32917000 | -2.39932900 | H | -5.39966300 | 0.85298200  | 1.00840800  |
| C  | 3.55833100  | -2.56614300 | -2.41517700 | C | -3.40369000 | 1.54874100  | 0.87658400  |
| O  | 2.56554100  | -3.35782000 | -2.11491600 | H | -3.16116900 | 1.75006300  | 1.90918100  |
| C  | 4.83027700  | -3.31178900 | -2.80592000 | C | -5.69869700 | 0.55041200  | -1.81200300 |
| H  | 5.06181900  | -4.01257800 | -1.99046500 | H | -6.04565800 | 1.40675100  | -2.40968800 |
| H  | 4.58142200  | -3.93943800 | -3.67471000 | H | -5.33301400 | -0.18916700 | -2.53805500 |
| C  | 6.01819200  | -2.39828400 | -3.10431600 | C | -6.93365300 | -0.02114100 | -1.06877000 |
| H  | 6.27505100  | -1.78762100 | -2.23108500 | H | -7.45087600 | 0.77561700  | -0.52230100 |

|   |             |             |             |   |             |             |             |
|---|-------------|-------------|-------------|---|-------------|-------------|-------------|
| H | -7.63683400 | -0.41208300 | -1.81682900 | H | -0.06702200 | 2.75443400  | 5.64488600  |
| C | -6.57100100 | -1.09025200 | -0.04069700 | H | 1.24386400  | 3.78914600  | 5.06524100  |
| O | -6.43566200 | -0.80855500 | 1.15735000  | O | 4.03801500  | 1.17054700  | -0.14190600 |
| N | -6.34392100 | -2.33998200 | -0.52216700 | C | 4.19532600  | 1.36456700  | 1.07633500  |
| H | -6.44254800 | -2.49872100 | -1.51729800 | O | 3.27775000  | 1.24999100  | 1.99459100  |
| C | -5.73629000 | -3.39266400 | 0.29825300  | C | 5.55178900  | 1.76757400  | 1.62802500  |
| H | -6.23490200 | -3.37920700 | 1.27317800  | H | 6.26148500  | 1.92235100  | 0.81108300  |
| H | -5.96136400 | -4.35240400 | -0.18382400 | H | 5.92205200  | 0.98001600  | 2.29686700  |
| C | -4.22145400 | -3.20852800 | 0.49281600  | H | 5.45527400  | 2.68249500  | 2.22483700  |
| H | -4.04027200 | -2.26386200 | 1.01658800  | O | 1.35191200  | -0.32006600 | 3.33103300  |
| H | -3.85995900 | -4.00870800 | 1.15440400  | C | 0.74068600  | -1.43031100 | 3.41281000  |
| C | -3.43680500 | -3.22722100 | -0.82301500 | O | 0.18219400  | -2.03625200 | 2.44570800  |
| H | -3.84367000 | -2.47254600 | -1.51495200 | C | 0.66406900  | -2.07555600 | 4.78673600  |
| H | -3.51333600 | -4.19490200 | -1.33508500 | H | -0.01406400 | -1.45934000 | 5.39788000  |
| C | -1.95802200 | -2.89017900 | -0.67729700 | H | 0.20524700  | -3.06503000 | 4.67689200  |
| O | -1.59273400 | -2.15576200 | 0.27417400  | C | 2.03333800  | -2.16886600 | 5.48220100  |
| O | -1.20467200 | -3.38766200 | -1.59319100 | H | 2.46930200  | -1.16348700 | 5.53925200  |
| O | -0.95964900 | 2.80993500  | 1.78269600  | H | 2.71265800  | -2.76950800 | 4.85924700  |
| C | -0.18083900 | 2.88793100  | 2.79002200  | C | 1.93230000  | -2.78589700 | 6.88081500  |
| O | 0.87358900  | 2.21319400  | 2.95602800  | H | 1.28323600  | -2.18605400 | 7.53437000  |
| C | -0.56470300 | 3.90251100  | 3.85927400  | H | 2.91949900  | -2.84718400 | 7.35679700  |
| H | -1.65571600 | 3.85862300  | 3.97772600  | H | 1.51653000  | -3.80250200 | 6.84219300  |
| H | -0.35367300 | 4.89288200  | 3.42653900  | O | -0.26775000 | 1.24201600  | -1.64520000 |
| C | 0.15807100  | 3.72949300  | 5.19551200  | H | -0.20937300 | 2.07137800  | -2.20346400 |
| H | -0.15322200 | 4.51154500  | 5.89958300  |   |             |             |             |

**TS:**

|    |             |             |             |   |             |             |             |
|----|-------------|-------------|-------------|---|-------------|-------------|-------------|
| Ca | 2.31159800  | -0.12538800 | -1.46131300 | H | 0.48863100  | -5.62803900 | -1.74345800 |
| Mn | 0.05014200  | 1.97457800  | 0.06085000  | H | -0.69678000 | -5.50823000 | -0.73454700 |
| Mn | 1.52765500  | 0.32435000  | 1.69701800  | O | 3.01017600  | -2.24171500 | -2.32506500 |
| Mn | -0.17890500 | -1.58423800 | 0.54741900  | C | 2.76798600  | -3.45552000 | -2.35054600 |
| Mn | -0.12753700 | -3.26882200 | -1.67452000 | O | 1.61716000  | -4.00244500 | -2.07593800 |
| O  | 1.77987000  | 1.55274200  | 0.39298300  | C | 3.84828200  | -4.46859800 | -2.72023700 |
| O  | -0.26352600 | 0.40079500  | 1.01319800  | H | 3.95001700  | -5.15651600 | -1.86760500 |
| O  | 1.58017200  | -1.17724300 | 0.67815800  | H | 3.45784600  | -5.07827400 | -3.54837500 |
| O  | 0.08355600  | -1.47716300 | -1.69836500 | C | 5.19309100  | -3.83867300 | -3.08032900 |
| O  | 0.02963600  | -3.29931700 | 0.11366100  | H | 5.58629300  | -3.24664500 | -2.24618000 |
| O  | 3.32988800  | 1.55722400  | -2.98484700 | H | 5.09716000  | -3.16951600 | -3.94331300 |
| H  | 2.89447000  | 2.43024200  | -2.85055400 | H | 5.92483800  | -4.61804800 | -3.32813900 |
| H  | 2.90514400  | 1.20818400  | -3.79458600 | O | 0.45690200  | 3.81827800  | -0.54171800 |
| O  | 1.28918500  | -0.07661300 | -3.88052500 | C | 1.12712000  | 4.24045800  | -1.55847300 |
| H  | 0.50917400  | 0.40326500  | -3.53578200 | O | 1.42776000  | 3.53836000  | -2.55678700 |
| H  | 0.94890000  | -1.00680000 | -3.89612800 | C | 1.55093100  | 5.70232600  | -1.48019900 |
| O  | -0.19364300 | -2.19986000 | -3.17732300 | H | 0.69897700  | 6.27603600  | -1.08874000 |
| O  | -0.46276600 | -5.39706200 | -1.67735400 | H | 2.32822500  | 5.76276100  | -0.70109000 |

|   |             |             |             |   |             |             |             |
|---|-------------|-------------|-------------|---|-------------|-------------|-------------|
| C | 2.06431900  | 6.29160300  | -2.79716300 | O | -2.15888200 | -1.64778700 | 0.11579200  |
| H | 1.27812600  | 6.21019400  | -3.56130800 | O | -2.06696200 | -3.20014000 | -1.53158000 |
| H | 2.90259300  | 5.68325700  | -3.16132800 | O | -0.24814500 | 2.95977200  | 1.79107000  |
| C | 2.50015400  | 7.75359800  | -2.65040800 | C | 0.46225200  | 2.78273900  | 2.83652600  |
| H | 1.66797600  | 8.38843400  | -2.31458200 | O | 1.27860300  | 1.83758000  | 3.02063800  |
| H | 3.31121600  | 7.85653100  | -1.91573200 | C | 0.31126100  | 3.83020600  | 3.93295900  |
| H | 2.86273100  | 8.15700500  | -3.60480400 | H | -0.75277000 | 4.09597900  | 3.99093000  |
| N | -1.98985900 | 2.24500300  | -0.26028000 | H | 0.82247100  | 4.73251700  | 3.56264900  |
| C | -2.67451700 | 1.98632800  | -1.42811400 | C | 0.86659000  | 3.41472500  | 5.29565200  |
| H | -2.13693400 | 1.73365600  | -2.33072800 | H | 0.74635600  | 4.23030400  | 6.02005100  |
| C | -4.02579700 | 2.07545500  | -1.19362400 | H | 0.34407300  | 2.53184400  | 5.68427600  |
| N | -4.13968200 | 2.40724200  | 0.15184200  | H | 1.93025800  | 3.16342900  | 5.22575900  |
| H | -5.00777700 | 2.31553800  | 0.68654300  | O | 4.21689800  | -0.06142700 | 0.04154100  |
| C | -2.89627800 | 2.48038100  | 0.67777200  | C | 4.34423300  | 0.06174500  | 1.27203100  |
| H | -2.67442000 | 2.68318800  | 1.71488100  | O | 3.37683100  | 0.23610600  | 2.12646800  |
| C | -5.19357300 | 1.90408300  | -2.13018500 | C | 5.71768300  | 0.00603200  | 1.91840000  |
| H | -5.26267900 | 2.76895800  | -2.80709200 | H | 6.49533400  | -0.03413700 | 1.15107500  |
| H | -4.98968900 | 1.03775600  | -2.77509900 | H | 5.78252300  | -0.88431500 | 2.55731600  |
| C | -6.58171600 | 1.73421300  | -1.46154500 | H | 5.86452700  | 0.88086200  | 2.56282400  |
| H | -6.89521300 | 2.67386400  | -0.99250400 | O | 1.06703700  | -0.74484700 | 3.32534300  |
| H | -7.31591800 | 1.50079600  | -2.24478800 | C | 0.09873900  | -1.55705400 | 3.39918600  |
| C | -6.59099500 | 0.67261500  | -0.36437500 | O | -0.62152400 | -1.93166300 | 2.41767200  |
| O | -6.44359300 | 0.97778200  | 0.82620900  | C | -0.24226200 | -2.12397900 | 4.76762900  |
| N | -6.70804800 | -0.61806500 | -0.77416700 | H | -0.71240200 | -1.31199200 | 5.34473000  |
| H | -6.79240300 | -0.80199300 | -1.76623300 | H | -0.99219700 | -2.91312400 | 4.63813400  |
| C | -6.46345300 | -1.74641100 | 0.12926000  | C | 0.99045200  | -2.64262400 | 5.52746100  |
| H | -6.95531400 | -1.51531800 | 1.07980400  | H | 1.72645700  | -1.83208400 | 5.59950000  |
| H | -6.95730000 | -2.62623600 | -0.30270400 | H | 1.46413500  | -3.44334000 | 4.94034900  |
| C | -4.96724700 | -2.00727600 | 0.37362900  | C | 0.63383700  | -3.16491700 | 6.92285400  |
| H | -4.51823800 | -1.11320700 | 0.81950500  | H | 0.18764900  | -2.37373800 | 7.54186900  |
| H | -4.87346800 | -2.81080700 | 1.11840200  | H | 1.52596900  | -3.53356100 | 7.44543400  |
| C | -4.20074400 | -2.38538100 | -0.89842000 | H | -0.08787200 | -3.99216400 | 6.87019600  |
| H | -4.39256800 | -1.64244700 | -1.68940100 | O | 0.21210700  | 1.33464500  | -1.65851000 |
| H | -4.51893100 | -3.35610100 | -1.29945200 | H | 0.57673100  | 2.13291400  | -2.14097400 |
| C | -2.68577500 | -2.41059500 | -0.73497700 |   |             |             |             |

**Pro:**

|    |             |             |             |   |            |             |             |
|----|-------------|-------------|-------------|---|------------|-------------|-------------|
| Ca | 2.27949900  | 0.49787000  | -1.46138400 | O | 0.54887100 | -1.40059600 | -2.05981800 |
| Mn | -0.44502300 | 1.90988800  | 0.18625500  | O | 0.79914700 | -3.12700500 | -0.07229600 |
| Mn | 1.40507100  | 0.62226100  | 1.73705800  | O | 2.86888800 | 2.50600200  | -2.81113700 |
| Mn | 0.13871800  | -1.53451100 | 0.55812600  | H | 2.10904900 | 3.13268900  | -2.75528700 |
| Mn | 0.66963800  | -3.14678100 | -1.81240300 | H | 2.78167200 | 2.10555600  | -3.69747300 |
| O  | 1.33366000  | 1.92508900  | 0.47780600  | O | 1.57572800 | 0.35787400  | -4.00010700 |
| O  | -0.38242800 | 0.32097600  | 1.15522100  | H | 0.68731400 | 0.75622300  | -4.02698500 |
| O  | 1.76789000  | -0.73641200 | 0.60172200  | H | 1.35671300 | -0.61474100 | -4.01434100 |

|   |             |             |             |   |             |             |             |
|---|-------------|-------------|-------------|---|-------------|-------------|-------------|
| O | 0.35179700  | -1.93332600 | -3.38701300 | H | -6.47612300 | -2.24069600 | -1.77187600 |
| O | 0.80258400  | -5.28589900 | -1.89306600 | C | -5.85801100 | -3.23593400 | 0.02182500  |
| H | 1.78004300  | -5.29895100 | -1.98254800 | H | -6.36723100 | -3.22737700 | 0.99129100  |
| H | 0.62202400  | -5.48505600 | -0.95335600 | H | -6.12582100 | -4.16749400 | -0.49294800 |
| O | 3.49434400  | -1.39750900 | -2.30670700 | C | -4.33869000 | -3.13392200 | 0.23855800  |
| C | 3.53982500  | -2.63063100 | -2.41254300 | H | -4.11757100 | -2.20819700 | 0.78046700  |
| O | 2.53725700  | -3.44522600 | -2.23264500 | H | -4.02824300 | -3.96321000 | 0.89081700  |
| C | 4.84016800  | -3.34098000 | -2.78080600 | C | -3.53168600 | -3.16735400 | -1.06483000 |
| H | 5.08846500  | -4.00860200 | -1.94183500 | H | -3.91000000 | -2.39870300 | -1.75788700 |
| H | 4.62633800  | -4.00253900 | -3.63285100 | H | -3.62104900 | -4.13087200 | -1.58195300 |
| C | 6.00021300  | -2.39508900 | -3.08806200 | C | -2.05038900 | -2.85563300 | -0.88610600 |
| H | 6.21949500  | -1.75029900 | -2.22965200 | O | -1.72585000 | -2.02811900 | 0.01220600  |
| H | 5.76377200  | -1.74383100 | -3.93786300 | O | -1.26248300 | -3.43883700 | -1.70363800 |
| H | 6.90445600  | -2.96643800 | -3.33371300 | O | -0.89495100 | 2.82176200  | 1.92378200  |
| O | -0.51290500 | 3.76694200  | -0.48403300 | C | -0.16026400 | 2.75530300  | 2.96744500  |
| C | -0.03904200 | 4.29670400  | -1.55704100 | O | 0.82873100  | 1.98804300  | 3.12977700  |
| O | 0.35868000  | 3.64806300  | -2.56080600 | C | -0.51959200 | 3.71756200  | 4.09395700  |
| C | 0.02028400  | 5.81943000  | -1.54411600 | H | -1.61504000 | 3.73856900  | 4.17253400  |
| H | -0.90465700 | 6.18528800  | -1.07690200 | H | -0.22928500 | 4.71978800  | 3.74222700  |
| H | 0.82947400  | 6.09533300  | -0.84829400 | C | 0.13807400  | 3.40382900  | 5.43805600  |
| C | 0.24917500  | 6.46502300  | -2.91397200 | H | -0.14737900 | 4.15461000  | 6.18598400  |
| H | -0.56072600 | 6.16683800  | -3.59525900 | H | -0.16769100 | 2.41754700  | 5.80848000  |
| H | 1.17371400  | 6.06548300  | -3.35108600 | H | 1.22962100  | 3.39735900  | 5.34854000  |
| C | 0.32497400  | 7.99354700  | -2.83168100 | O | 4.10742800  | 0.96560500  | 0.06130400  |
| H | -0.60248800 | 8.41955700  | -2.42364600 | C | 4.20554400  | 1.06566800  | 1.29668200  |
| H | 1.15067100  | 8.31757000  | -2.18266500 | O | 3.22956500  | 0.96963500  | 2.15249400  |
| H | 0.48732400  | 8.43654800  | -3.82285400 | C | 5.55599400  | 1.31486200  | 1.94723200  |
| N | -2.50548300 | 1.71022700  | -0.07973200 | H | 6.31877500  | 1.48525700  | 1.18282500  |
| C | -3.15474600 | 1.38082900  | -1.24978700 | H | 5.83183900  | 0.44509200  | 2.55757700  |
| H | -2.60745100 | 1.30829300  | -2.17887200 | H | 5.49368700  | 2.17828900  | 2.62022500  |
| C | -4.48353100 | 1.15072500  | -0.98557500 | O | 1.26209400  | -0.62468100 | 3.30393100  |
| N | -4.62292200 | 1.35883200  | 0.38230600  | C | 0.59479900  | -1.69817500 | 3.34744200  |
| H | -5.42487300 | 1.02848000  | 0.92508600  | O | 0.01289900  | -2.25107900 | 2.35487600  |
| C | -3.40858800 | 1.67380600  | 0.88876400  | C | 0.46063300  | -2.39060700 | 4.69403000  |
| H | -3.20258800 | 1.85228600  | 1.93376100  | H | -0.27071900 | -1.81035200 | 5.27941700  |
| C | -5.61637600 | 0.79498400  | -1.91227700 | H | 0.03089600  | -3.38577400 | 4.52953700  |
| H | -5.92024000 | 1.67928200  | -2.49279200 | C | 1.78565100  | -2.47260900 | 5.46938700  |
| H | -5.23887100 | 0.07154100  | -2.64840700 | H | 2.19487300  | -1.46028600 | 5.57626600  |
| C | -6.89233600 | 0.22937800  | -1.23770000 | H | 2.51537700  | -3.04245200 | 4.87526100  |
| H | -7.40764800 | 1.01824400  | -0.67796000 | C | 1.61346800  | -3.12649800 | 6.84413400  |
| H | -7.57829700 | -0.11160700 | -2.02521900 | H | 0.91278500  | -2.55681500 | 7.47091100  |
| C | -6.59408300 | -0.88916700 | -0.24252600 | H | 2.57099900  | -3.17912200 | 7.37824400  |
| O | -6.48089000 | -0.65791000 | 0.96797800  | H | 1.22343100  | -4.15034900 | 6.75660700  |
| N | -6.40234700 | -2.12783500 | -0.76844200 | O | -0.17727500 | 1.24292100  | -1.50417100 |

**Table S24** Reaction parameters for the open-cubane W2 (hydroxyl/oxy)-O5 (oxo) nucleophilic attack with deprotonated Wx:

| Spin state | Spin topology<br>(Mn1~Mn4-O10)   | Gibbs Free energy (a.u.) |            |            |
|------------|----------------------------------|--------------------------|------------|------------|
|            |                                  | Rea                      | TS         | Pro        |
| doublet    | $\alpha\alpha\beta\alpha$        | \                        | \          | \          |
|            | $\alpha\beta\alpha\beta$         | -3366.2138               | -3366.1366 | -3366.1573 |
|            | $\alpha\beta\beta\alpha$         | -3366.2151               | -3366.1356 | -3366.2313 |
|            | $\beta\alpha\alpha\beta$         | -3366.2244               | -3366.1530 | -3366.1724 |
|            | $\beta\alpha\beta\alpha$         | -3366.2270               | -3366.1480 | -3366.1664 |
|            | $\beta\beta\alpha\alpha$         | -3366.2261               | -3366.1466 | -3366.2298 |
| sextet     | $\alpha\alpha\alpha\beta\beta$   | -3366.2276               | -3366.1471 | -3366.1659 |
|            | $\alpha\alpha\beta\alpha\beta$   | -3366.2277               | -3366.1532 | -3366.1684 |
|            | $\alpha\beta\alpha\alpha\beta$   | -3366.2273               | -3366.1166 | -3366.1522 |
|            | $\beta\alpha\alpha\alpha\beta$   | -3366.2158               | -3366.1043 | -3366.2002 |
| octet      | $\alpha\alpha\alpha\beta\alpha$  | -3366.2143               | -3366.1358 | -3366.1549 |
|            | $\alpha\alpha\beta\alpha\alpha$  | -3366.2154               | -3366.1378 | -3366.1564 |
|            | $\alpha\beta\alpha\alpha\alpha$  | -3366.2145               | -3366.1532 | -3366.1662 |
|            | $\beta\alpha\alpha\alpha\alpha$  | -3366.2274               | -3366.1409 | -3366.2428 |
| 12-et      | $\alpha\alpha\alpha\alpha\beta$  | \                        | \          | \          |
| 14-et      | $\alpha\alpha\alpha\alpha\alpha$ | -3366.2153               | -3366.1519 | -3366.1679 |

  

| Spin state | Spin topology<br>(Mn1~Mn4-O4/O10) | Relative Gibbs Free energy (kcal/mol) |                            |                        |                        |
|------------|-----------------------------------|---------------------------------------|----------------------------|------------------------|------------------------|
|            |                                   | $\Delta G^\ddagger(\text{Rea-TS})$    | $\Delta G(\text{Rea-Pro})$ | $\Delta G(\text{Rea})$ | $\Delta G(\text{Pro})$ |
| doublet    | $\alpha\alpha\beta\beta\alpha$    | \                                     | \                          | \                      | \                      |
|            | $\alpha\beta\alpha\beta\alpha$    | 48.4                                  | 35.5                       | 8.7                    | 53.7                   |
|            | $\alpha\beta\beta\alpha\alpha$    | 49.9                                  | -10.2                      | 7.9                    | 7.2                    |
|            | $\beta\alpha\alpha\beta\alpha$    | 44.8                                  | 32.6                       | 2.1                    | 44.2                   |
|            | $\beta\alpha\beta\alpha\alpha$    | 49.6                                  | 38.0                       | 0.4                    | 47.9                   |
|            | $\beta\beta\alpha\alpha\alpha$    | 49.9                                  | -2.3                       | 1.0                    | 8.2                    |
| sextet     | $\alpha\alpha\alpha\beta\beta$    | 50.5                                  | 38.7                       | 0.1                    | 48.3                   |
|            | $\alpha\alpha\beta\alpha\beta$    | 46.7                                  | 37.2                       | 0.0                    | 46.7                   |
|            | $\alpha\beta\alpha\alpha\beta$    | 69.5                                  | 47.1                       | 0.3                    | 56.9                   |
|            | $\beta\alpha\alpha\alpha\beta$    | 70.0                                  | 9.8                        | 7.5                    | 26.7                   |
| octet      | $\alpha\alpha\alpha\beta\alpha$   | 49.3                                  | 37.3                       | 8.4                    | 55.2                   |
|            | $\alpha\alpha\beta\alpha\alpha$   | 48.7                                  | 37.0                       | 7.7                    | 54.2                   |
|            | $\alpha\beta\alpha\alpha\alpha$   | 38.5                                  | 30.3                       | 8.3                    | 48.1                   |
|            | $\beta\alpha\alpha\alpha\alpha$   | 54.3                                  | -9.7                       | 0.2                    | 0.0                    |
| 12-et      | $\alpha\alpha\alpha\alpha\beta$   | \                                     | \                          | \                      | \                      |
| 14-et      | $\alpha\alpha\alpha\alpha\alpha$  | 39.8                                  | 29.7                       | 7.8                    | 47.0                   |



| Spin state | Spin topology<br>(Mn1~Mn4-O10) |          | Mulliken spin density |       |       |       |
|------------|--------------------------------|----------|-----------------------|-------|-------|-------|
|            |                                |          | Rea                   | TS    | Pro   |       |
| doublet    | $\alpha$                       | Mn1      | \                     | \     | \     |       |
|            | $\alpha$                       | Mn2      | \                     | \     | \     |       |
|            | $\beta$                        | Mn3      | \                     | \     | \     |       |
|            | $\beta$                        | Mn4      | \                     | \     | \     |       |
|            | $\alpha$                       | O10      | \                     | \     | \     |       |
|            |                                | O7       | \                     | \     | \     |       |
|            |                                | $\alpha$ | Mn1                   | 2.80  | 2.80  | 2.80  |
|            |                                | $\beta$  | Mn2                   | -2.91 | -2.91 | -2.89 |
|            |                                | $\alpha$ | Mn3                   | 2.87  | 3.49  | 3.80  |
|            |                                | $\beta$  | Mn4                   | -2.83 | -3.81 | -3.80 |
|            |                                | $\alpha$ | O10                   | 0.90  | 0.90  | 0.89  |
|            |                                |          | O7                    | -0.03 | 0.31  | 0.01  |
|            |                                | $\alpha$ | Mn1                   | 2.80  | 2.78  | 2.96  |
|            |                                | $\beta$  | Mn2                   | -2.93 | -2.95 | -2.93 |
|            |                                | $\beta$  | Mn3                   | -2.89 | -3.52 | -2.84 |
|            |                                | $\alpha$ | Mn4                   | 2.87  | 3.83  | 3.86  |
|            |                                | $\alpha$ | O10                   | 0.89  | 0.91  | 0.02  |
|            |                                |          | O7                    | 0.04  | -0.31 | 0.01  |
|            |                                | $\beta$  | Mn1                   | -2.80 | -2.77 | -2.76 |
|            |                                | $\alpha$ | Mn2                   | 2.93  | 2.96  | 2.97  |
|            |                                | $\alpha$ | Mn3                   | 2.90  | 3.51  | 3.82  |
|            |                                | $\beta$  | Mn4                   | -2.84 | -3.82 | -3.81 |
|            |                                | $\alpha$ | O10                   | 0.67  | 0.64  | 0.66  |
|            |                                |          | O7                    | -0.04 | 0.33  | 0.01  |
|            |                                | $\beta$  | Mn1                   | -2.79 | -2.81 | -2.81 |
|            |                                | $\alpha$ | Mn2                   | 2.91  | 2.91  | 2.89  |
|            |                                | $\beta$  | Mn3                   | -2.87 | -3.51 | -3.80 |
|            |                                | $\alpha$ | Mn4                   | 2.86  | 3.83  | 3.81  |
|            | $\alpha$                       | O10      | 0.69                  | 0.70  | 0.72  |       |
|            |                                | O7       | 0.04                  | -0.30 | 0.00  |       |
|            | $\beta$                        | Mn1      | -2.80                 | -2.79 | -2.91 |       |
|            | $\beta$                        | Mn2      | -2.94                 | -2.90 | -2.95 |       |
|            | $\alpha$                       | Mn3      | 2.87                  | 3.77  | 3.80  |       |
|            | $\alpha$                       | Mn4      | 2.91                  | 2.16  | 3.93  |       |
|            | $\alpha$                       | O10      | 0.70                  | 0.73  | 0.04  |       |
|            |                                | O7       | 0.04                  | -0.17 | -0.50 |       |
|            |                                | O5       | 0.10                  | -0.01 | -0.52 |       |
| sextet     | $\alpha$                       | Mn1      | 2.81                  | 2.82  | 2.82  |       |
|            | $\alpha$                       | Mn2      | 2.95                  | 2.97  | 2.97  |       |
|            | $\alpha$                       | Mn3      | 2.91                  | 3.56  | 3.83  |       |
|            | $\beta$                        | Mn4      | -2.86                 | -3.84 | -3.81 |       |

|       |          |     |       |       |       |
|-------|----------|-----|-------|-------|-------|
|       | $\beta$  | O10 | -0.68 | -0.68 | -0.71 |
|       |          | O7  | -0.04 | 0.30  | 0.01  |
|       | $\alpha$ | Mn1 | 2.80  | 2.78  | 2.81  |
|       | $\alpha$ | Mn2 | 2.93  | 2.93  | 2.91  |
|       | $\beta$  | Mn3 | -2.87 | -3.56 | -3.79 |
|       | $\alpha$ | Mn4 | 2.84  | 3.59  | 3.80  |
|       | $\beta$  | O10 | -0.69 | -0.43 | -0.71 |
|       |          | O7  | 0.03  | -0.26 | -0.01 |
|       | $\alpha$ | Mn1 | 2.81  | 2.78  | 2.85  |
|       | $\beta$  | Mn2 | -2.91 | -2.81 | -2.88 |
|       | $\alpha$ | Mn3 | 2.89  | 3.64  | 3.86  |
|       | $\alpha$ | Mn4 | 2.88  | 1.96  | 1.94  |
|       | $\beta$  | O10 | 0.68  | -0.63 | -0.65 |
|       |          | O7  | 0.04  | 0.24  | -0.03 |
|       | $\beta$  | Mn1 | -2.80 | -2.79 | -2.92 |
|       | $\alpha$ | Mn2 | 2.93  | 2.96  | 2.93  |
|       | $\alpha$ | Mn3 | 2.91  | 3.67  | 2.94  |
|       | $\alpha$ | Mn4 | 2.87  | 1.95  | 1.98  |
|       | $\beta$  | O10 | -0.89 | -0.90 | -0.01 |
|       |          | O7  | 0.04  | 0.23  | -0.01 |
|       | $\alpha$ | Mn1 | 2.82  | 2.81  | 2.81  |
|       | $\alpha$ | Mn2 | 2.94  | 2.96  | 2.96  |
|       | $\alpha$ | Mn3 | 2.91  | 3.53  | 3.83  |
|       | $\beta$  | Mn4 | -2.83 | -3.82 | -3.80 |
|       | $\alpha$ | O10 | 0.90  | 0.90  | 0.90  |
|       |          | O7  | -0.04 | 0.31  | 0.01  |
| octet | $\alpha$ | Mn1 | 2.81  | 2.80  | 2.79  |
|       | $\alpha$ | Mn2 | 2.92  | 2.92  | 2.91  |
|       | $\beta$  | Mn3 | -2.86 | -3.48 | -3.78 |
|       | $\alpha$ | Mn4 | 2.87  | 3.84  | 3.81  |
|       | $\alpha$ | O10 | 0.90  | 0.91  | 0.90  |
|       |          | O7  | 0.01  | -0.31 | 0.00  |
|       | $\alpha$ | Mn1 | 2.80  | 2.80  | 2.81  |
|       | $\beta$  | Mn2 | -2.91 | -2.90 | -2.89 |
|       | $\alpha$ | Mn3 | 2.88  | 3.62  | 3.88  |
|       | $\alpha$ | Mn4 | 2.91  | 3.69  | 3.86  |
|       | $\alpha$ | O10 | 0.90  | -0.39 | -0.71 |
|       |          | O7  | 0.04  | 0.29  | 0.01  |
|       | $\beta$  | Mn1 | -2.78 | -2.74 | -2.80 |
|       | $\alpha$ | Mn2 | 2.93  | 2.94  | 2.90  |
|       | $\alpha$ | Mn3 | 2.90  | 3.80  | 3.80  |
|       | $\alpha$ | Mn4 | 2.91  | 2.15  | 3.91  |
|       | $\alpha$ | O10 | 0.70  | 0.74  | 0.04  |
|       |          | O7  | 0.04  | -0.17 | -0.58 |

|       |          | O5  | 0.10 | 0.04  | -0.49 |
|-------|----------|-----|------|-------|-------|
| 12-et | $\alpha$ | Mn1 | \    | \     | \     |
|       | $\alpha$ | Mn2 | \    | \     | \     |
|       | $\alpha$ | Mn3 | \    | \     | \     |
|       | $\alpha$ | Mn4 | \    | \     | \     |
|       | $\beta$  | O10 | \    | \     | \     |
|       |          | O7  | \    | \     | \     |
| 14-et | $\alpha$ | Mn1 | 2.82 | 2.90  | 2.81  |
|       | $\alpha$ | Mn2 | 2.94 | 2.96  | 2.89  |
|       | $\alpha$ | Mn3 | 2.92 | 3.91  | 3.88  |
|       | $\alpha$ | Mn4 | 2.91 | 2.78  | 3.86  |
|       | $\alpha$ | O10 | 0.91 | -0.31 | 0.71  |
|       |          |     | O7   | 0.04  | 0.32  |
|       |          | O5  | 0.09 | 0.20  | 0.10  |

'\` denotes TSs for some spin states do not exist due to the failure of IRC verification on reactants concerning W2 returning back to Mn4.

**Rea:**

|    |             |             |             |   |             |             |             |
|----|-------------|-------------|-------------|---|-------------|-------------|-------------|
| Ca | 2.20008300  | 0.13855800  | -1.51294800 | C | 5.57783700  | -3.63638700 | -1.77828500 |
| Mn | -0.20160400 | 1.92644800  | -0.00055500 | H | 5.74053900  | -2.91696500 | -0.96810500 |
| Mn | 1.32244600  | 0.49022600  | 1.78539800  | H | 5.71263600  | -3.09991600 | -2.72516500 |
| Mn | -0.15079500 | -1.54451000 | 0.52042600  | H | 6.34634100  | -4.41728700 | -1.71245500 |
| Mn | 0.06911300  | -3.06749600 | -1.70416200 | O | 0.20050800  | 3.36329500  | -1.24198000 |
| O  | 1.53633900  | 1.62423800  | 0.39068800  | C | 1.31500900  | 3.53023700  | -1.90397000 |
| O  | -0.44279300 | 0.42621200  | 1.04971000  | O | 2.12913600  | 2.63820200  | -2.18560800 |
| O  | 1.53812200  | -1.06278100 | 0.91141300  | C | 1.53304700  | 4.97696800  | -2.34024200 |
| O  | 0.24608000  | -1.36939300 | -1.27906800 | H | 0.65899000  | 5.26767000  | -2.94284200 |
| O  | 0.00424600  | -3.26552200 | 0.12559500  | H | 1.48496000  | 5.60352200  | -1.43694200 |
| O  | 4.36949700  | 1.05206100  | -2.45212900 | C | 2.83257700  | 5.22069900  | -3.11122100 |
| H  | 4.79809000  | 0.99740200  | -1.57183900 | H | 2.86120400  | 4.55898100  | -3.98767500 |
| H  | 4.03993500  | 1.96941900  | -2.52864300 | H | 3.68596000  | 4.93180400  | -2.48131800 |
| O  | 1.72102700  | -0.61960700 | -3.85285200 | C | 2.98355900  | 6.68140700  | -3.55042800 |
| H  | 2.54133000  | -0.99938500 | -4.21044600 | H | 2.15856100  | 6.98779400  | -4.20881700 |
| H  | 1.09327900  | -1.39568700 | -3.80434300 | H | 2.98732000  | 7.36110900  | -2.68671700 |
| O  | 0.13533400  | -2.86355300 | -3.55065000 | H | 3.92179600  | 6.83464600  | -4.09911100 |
| H  | -0.77454900 | -2.67113600 | -3.84417100 | N | -2.25047700 | 2.22389300  | -0.23739500 |
| O  | -0.26528900 | -5.21203400 | -1.68856900 | C | -2.95508100 | 2.10311800  | -1.41543300 |
| H  | 0.68423800  | -5.41774000 | -1.82477400 | H | -2.43356300 | 1.97824100  | -2.35408400 |
| H  | -0.39076600 | -5.26196500 | -0.71752700 | C | -4.30227700 | 2.14240400  | -1.14734600 |
| O  | 3.29031200  | -2.01294800 | -1.75001300 | N | -4.39421800 | 2.30282500  | 0.23163800  |
| C  | 3.05176300  | -3.22558100 | -1.74287000 | H | -5.24650800 | 2.12128000  | 0.76761200  |
| O  | 1.86806200  | -3.76836600 | -1.78192300 | C | -3.14011900 | 2.32764600  | 0.73831500  |
| C  | 4.18217600  | -4.25207800 | -1.68734500 | H | -2.90586300 | 2.39604100  | 1.79045100  |
| H  | 4.05934900  | -4.80945200 | -0.74640400 | C | -5.48588700 | 2.07128800  | -2.07562600 |
| H  | 4.01171700  | -4.98272700 | -2.49108400 | H | -5.62287600 | 3.03417200  | -2.59088700 |

|   |             |             |             |   |             |             |             |
|---|-------------|-------------|-------------|---|-------------|-------------|-------------|
| H | -5.25196900 | 1.34309200  | -2.86465200 | C | 0.71034000  | 3.98064500  | 5.00970000  |
| C | -6.84152500 | 1.70618000  | -1.41736100 | H | 0.62082200  | 4.87846000  | 5.63448600  |
| H | -7.21433200 | 2.54883000  | -0.82416200 | H | 0.16618400  | 3.16480800  | 5.50088600  |
| H | -7.57518100 | 1.51989100  | -2.21366700 | H | 1.76567600  | 3.69047700  | 4.96532100  |
| C | -6.74708900 | 0.51676600  | -0.46419800 | O | 4.08754900  | 0.44284500  | 0.20144300  |
| O | -6.62444500 | 0.68246300  | 0.75629700  | C | 4.16684100  | 0.54744800  | 1.44073900  |
| N | -6.74544600 | -0.71676900 | -1.03371900 | O | 3.16745300  | 0.55340700  | 2.26952800  |
| H | -6.82140400 | -0.78397600 | -2.04102300 | C | 5.51818200  | 0.69289100  | 2.12125900  |
| C | -6.44101700 | -1.93041300 | -0.26925800 | H | 5.57827100  | 1.67409800  | 2.60963900  |
| H | -6.99602700 | -1.87239500 | 0.67325500  | H | 6.32728600  | 0.59327800  | 1.39232500  |
| H | -6.83308400 | -2.78159300 | -0.84044200 | H | 5.62312900  | -0.06674500 | 2.90495800  |
| C | -4.94279200 | -2.10450400 | 0.03029100  | O | 0.78515300  | -0.51516400 | 3.42531800  |
| H | -4.59767500 | -1.25802500 | 0.63328200  | C | -0.04719500 | -1.47399800 | 3.42503300  |
| H | -4.82107300 | -3.00326300 | 0.65190200  | O | -0.61777600 | -1.96602500 | 2.39989300  |
| C | -4.07747900 | -2.22426900 | -1.22931500 | C | -0.40644500 | -2.07356100 | 4.77588100  |
| H | -4.23760800 | -1.34793200 | -1.87767900 | H | -1.03040000 | -1.33389800 | 5.30231400  |
| H | -4.33556800 | -3.11092400 | -1.82251300 | H | -1.02328600 | -2.96335200 | 4.60398300  |
| C | -2.57913000 | -2.26156400 | -0.94903000 | C | 0.82544000  | -2.40473500 | 5.63509400  |
| O | -2.14564400 | -1.64751000 | 0.05888000  | H | 1.42893200  | -1.49577000 | 5.75170100  |
| O | -1.87963100 | -2.91052600 | -1.80802700 | H | 1.45416000  | -3.13014600 | 5.09765200  |
| O | -0.39464500 | 3.19388300  | 1.55024500  | C | 0.44158900  | -2.96919000 | 7.00667700  |
| C | 0.25424200  | 3.07727200  | 2.64389200  | H | -0.16087900 | -2.24940800 | 7.57875100  |
| O | 0.96354600  | 2.08681300  | 2.97860800  | H | 1.33435900  | -3.20331700 | 7.60096000  |
| C | 0.15619700  | 4.25123100  | 3.61079600  | H | -0.14696800 | -3.89237800 | 6.91059800  |
| H | -0.89775200 | 4.55974000  | 3.64433100  | O | -0.19779300 | 1.04843700  | -1.57135800 |
| H | 0.69121000  | 5.08641800  | 3.13269300  |   |             |             |             |

**TS:**

|    |             |             |             |   |             |             |             |
|----|-------------|-------------|-------------|---|-------------|-------------|-------------|
| Ca | 2.43728300  | -0.06486200 | -1.16624300 | H | -0.82514300 | -1.76699500 | -3.05246300 |
| Mn | -0.12122200 | 1.95179000  | -0.18677100 | O | -0.01944700 | -5.52522000 | -1.06084400 |
| Mn | 1.09242800  | 0.59002600  | 1.85847800  | H | 0.93817600  | -5.69734900 | -1.21727500 |
| Mn | -0.39564400 | -1.44753200 | 0.62612400  | H | -0.16722400 | -5.60253800 | -0.09773000 |
| Mn | 0.17923800  | -3.42103100 | -1.26515300 | O | 3.28954500  | -2.33453000 | -1.73761400 |
| O  | 1.53710100  | 1.63650200  | 0.45204000  | C | 3.16042900  | -3.57342700 | -1.83823500 |
| O  | -0.59161500 | 0.56022800  | 0.94646300  | O | 2.02613200  | -4.19541800 | -1.85816300 |
| O  | 1.32815700  | -0.97500400 | 1.01696100  | C | 4.39344900  | -4.46818400 | -1.96114900 |
| O  | 0.33668900  | -1.58343300 | -1.37668400 | H | 4.36081800  | -5.17632600 | -1.11896900 |
| O  | -0.04117400 | -3.22980200 | 0.48005900  | H | 4.26230600  | -5.08362300 | -2.86360100 |
| O  | 4.73614700  | 0.75679600  | -1.86532900 | C | 5.72375900  | -3.71688300 | -1.99030300 |
| H  | 5.04174600  | 0.80489700  | -0.93634200 | H | 5.86392700  | -3.12975200 | -1.07551400 |
| H  | 4.42354800  | 1.65498900  | -2.09316200 | H | 5.76603200  | -3.01839100 | -2.83442900 |
| O  | 2.35938100  | -0.46675600 | -3.65633100 | H | 6.56182200  | -4.41978900 | -2.08287800 |
| H  | 2.99765400  | -1.20416200 | -3.63585900 | O | 0.49156000  | 3.23794200  | -1.49007400 |
| H  | 1.48619200  | -0.91709200 | -3.70878500 | C | 1.70496200  | 3.32832400  | -1.97622500 |
| O  | 0.13032800  | -1.98099600 | -3.03347100 | O | 2.52924100  | 2.40698200  | -2.03067900 |

|   |             |             |             |   |             |             |             |
|---|-------------|-------------|-------------|---|-------------|-------------|-------------|
| C | 2.02129600  | 4.72235800  | -2.51207700 | H | -4.48883800 | -3.39151500 | -1.61020800 |
| H | 1.25702800  | 4.95940100  | -3.26783400 | C | -2.69267700 | -2.43275000 | -0.96051500 |
| H | 1.85140000  | 5.43644400  | -1.69217700 | O | -2.26322000 | -1.63970100 | -0.05711500 |
| C | 3.42926400  | 4.87413700  | -3.09278300 | O | -1.99208100 | -3.19640100 | -1.68505400 |
| H | 3.57430500  | 4.12728200  | -3.88523100 | O | -0.44399100 | 3.34730800  | 1.21837000  |
| H | 4.16845500  | 4.64104300  | -2.31327200 | C | 0.04417000  | 3.28090800  | 2.39930000  |
| C | 3.68287500  | 6.28172800  | -3.64382900 | O | 0.64500400  | 2.28877500  | 2.89597000  |
| H | 2.97636200  | 6.52894500  | -4.44863400 | C | -0.12210500 | 4.52863000  | 3.25903200  |
| H | 3.57212800  | 7.04476300  | -2.86051300 | H | -1.15277600 | 4.88463400  | 3.12406300  |
| H | 4.69756300  | 6.36928300  | -4.05320700 | H | 0.51689000  | 5.30126500  | 2.80395700  |
| N | -2.11600000 | 2.28369200  | -0.69925900 | C | 0.22120500  | 4.34082400  | 4.73685700  |
| C | -2.71474600 | 1.98830300  | -1.90474000 | H | 0.09665200  | 5.28654400  | 5.27962800  |
| H | -2.11358800 | 1.72731500  | -2.76445500 | H | -0.42830200 | 3.58957400  | 5.20240500  |
| C | -4.08047100 | 2.06617400  | -1.76796100 | H | 1.25534300  | 4.00135400  | 4.86013100  |
| N | -4.29189100 | 2.43343700  | -0.44374900 | O | 4.06724700  | 0.24386900  | 0.72025900  |
| H | -5.19448800 | 2.34448800  | 0.03249200  | C | 3.96552800  | 0.47261700  | 1.94398500  |
| C | -3.08904200 | 2.53447900  | 0.16460100  | O | 2.85853400  | 0.62165100  | 2.59647900  |
| H | -2.94830300 | 2.76048500  | 1.21107800  | C | 5.20829300  | 0.60856400  | 2.80810700  |
| C | -5.18074800 | 1.84073100  | -2.77247400 | H | 5.26117200  | 1.62634900  | 3.21561000  |
| H | -5.22302600 | 2.68122200  | -3.48164700 | H | 6.10791600  | 0.39691000  | 2.22354900  |
| H | -4.91795200 | 0.95837800  | -3.37301000 | H | 5.14400400  | -0.07893200 | 3.65989300  |
| C | -6.60670000 | 1.66061300  | -2.19066400 | O | 0.40768800  | -0.27829200 | 3.50490800  |
| H | -6.97492100 | 2.61170300  | -1.78941900 | C | -0.50049600 | -1.17217100 | 3.55574900  |
| H | -7.27908500 | 1.37163300  | -3.01010600 | O | -1.06997700 | -1.69891000 | 2.55679300  |
| C | -6.67130000 | 0.65218900  | -1.04469300 | C | -0.93561000 | -1.61551300 | 4.94583100  |
| O | -6.62220800 | 1.02210400  | 0.13610300  | H | -1.53124400 | -0.79398200 | 5.37500100  |
| N | -6.72867000 | -0.65912900 | -1.39326200 | H | -1.60008600 | -2.48073800 | 4.83607400  |
| H | -6.73303300 | -0.89554300 | -2.37769500 | C | 0.24351900  | -1.93137700 | 5.88058300  |
| C | -6.54008000 | -1.73629000 | -0.41481500 | H | 0.89618800  | -1.05100300 | 5.93429100  |
| H | -7.10552200 | -1.46178000 | 0.48171500  | H | 0.84588400  | -2.73958700 | 5.43946600  |
| H | -6.99244800 | -2.64327800 | -0.83619900 | C | -0.21886700 | -2.33822800 | 7.28352600  |
| C | -5.06438400 | -1.96570600 | -0.04648000 | H | -0.79672400 | -1.53393800 | 7.76065200  |
| H | -4.65721300 | -1.04529300 | 0.38548400  | H | 0.63761000  | -2.56320900 | 7.93246600  |
| H | -5.02141400 | -2.72716300 | 0.74555600  | H | -0.85790400 | -3.23198300 | 7.25254700  |
| C | -4.19878600 | -2.40225200 | -1.23278000 | O | 0.05419500  | 0.89931700  | -1.63682500 |
| H | -4.33395300 | -1.69787900 | -2.07048200 |   |             |             |             |

**Pro:**

|    |             |             |             |   |            |             |             |
|----|-------------|-------------|-------------|---|------------|-------------|-------------|
| Ca | 2.40616000  | -0.17425600 | -1.12231900 | O | 1.31973700 | -0.72429800 | 1.13855200  |
| Mn | -0.21626300 | 1.90048400  | -0.41645800 | O | 0.56642900 | -1.93529300 | -1.38466400 |
| Mn | 1.08043700  | 0.92090700  | 1.77869800  | O | 0.01582600 | -3.02891300 | 0.99733900  |
| Mn | -0.45231400 | -1.27267600 | 0.98397300  | O | 4.67182800 | 0.57174500  | -1.99249800 |
| Mn | 0.40389400  | -3.62038000 | -0.62277000 | H | 4.98333900 | 0.79427600  | -1.09110400 |
| O  | 1.46329600  | 1.75263200  | 0.21254500  | H | 4.32393600 | 1.40256700  | -2.37308800 |
| O  | -0.64913000 | 0.74262200  | 0.96620000  | O | 2.44642400 | -0.90518600 | -3.55512600 |

|   |             |             |             |   |             |             |             |
|---|-------------|-------------|-------------|---|-------------|-------------|-------------|
| H | 3.08152200  | -1.62774500 | -3.39018000 | C | -6.70181400 | 0.20122700  | -1.12907500 |
| H | 1.58385900  | -1.36121300 | -3.63924700 | O | -6.67640100 | 0.65696000  | 0.02185200  |
| O | 0.22039400  | -2.37015300 | -2.72965600 | N | -6.68828400 | -1.13333700 | -1.38126100 |
| H | -0.76138600 | -2.42476900 | -2.63872600 | H | -6.68138000 | -1.44223500 | -2.34528500 |
| O | 0.16055700  | -5.53696000 | 0.18320000  | C | -6.46945700 | -2.12588200 | -0.32288800 |
| H | 1.06583800  | -5.89964200 | 0.10151100  | H | -7.08650700 | -1.83138900 | 0.53267200  |
| H | 0.03687400  | -5.25593800 | 1.11492100  | H | -6.84527400 | -3.08730900 | -0.69589800 |
| O | 3.36135800  | -2.57217900 | -1.44263600 | C | -4.99912400 | -2.23105900 | 0.11538500  |
| C | 3.21545600  | -3.80862600 | -1.50634300 | H | -4.67044600 | -1.25794500 | 0.49484600  |
| O | 2.09663700  | -4.44482200 | -1.30670800 | H | -4.94262300 | -2.93145200 | 0.96126000  |
| C | 4.39993600  | -4.71318400 | -1.84443500 | C | -4.05510400 | -2.68954900 | -1.00128700 |
| H | 4.51281500  | -5.42084600 | -1.00899200 | H | -4.20322500 | -2.05758600 | -1.89288300 |
| H | 4.10563400  | -5.32925100 | -2.70708200 | H | -4.25775800 | -3.72223200 | -1.31333600 |
| C | 5.70848800  | -3.97024000 | -2.11076400 | C | -2.56547300 | -2.58409500 | -0.66450400 |
| H | 6.00433700  | -3.36954900 | -1.24320200 | O | -2.23533500 | -1.67169000 | 0.15939000  |
| H | 5.61211000  | -3.28521400 | -2.96163500 | O | -1.78021100 | -3.37507100 | -1.27516800 |
| H | 6.51539100  | -4.68021000 | -2.33316500 | O | -0.53856300 | 3.51390300  | 0.72216900  |
| O | 0.31791700  | 2.92601800  | -1.96472700 | C | -0.02680100 | 3.65653800  | 1.88848700  |
| C | 1.51628100  | 2.96945500  | -2.48926700 | O | 0.60559500  | 2.77750700  | 2.53354900  |
| O | 2.37618100  | 2.08317400  | -2.39828400 | C | -0.21139200 | 5.03003200  | 2.52504000  |
| C | 1.76934600  | 4.25313100  | -3.27631700 | H | -1.25782700 | 5.32599000  | 2.36755300  |
| H | 0.97842100  | 4.32766600  | -4.03814100 | H | 0.38552300  | 5.73125200  | 1.92153700  |
| H | 1.59470000  | 5.09706700  | -2.59197600 | C | 0.18144700  | 5.11125700  | 4.00013500  |
| C | 3.15597300  | 4.34174600  | -3.91813100 | H | 0.03987600  | 6.13248400  | 4.37671200  |
| H | 3.30914700  | 3.46862300  | -4.56703600 | H | -0.42706100 | 4.43263400  | 4.61015100  |
| H | 3.92206400  | 4.27723900  | -3.13245600 | H | 1.23000400  | 4.82855800  | 4.14376700  |
| C | 3.34433200  | 5.63363500  | -4.72117500 | O | 4.05467400  | 0.45814800  | 0.64193200  |
| H | 2.60979300  | 5.70864100  | -5.53536500 | C | 3.96392100  | 0.89148100  | 1.81173000  |
| H | 3.22461400  | 6.52192000  | -4.08503800 | O | 2.86610700  | 1.12239200  | 2.45033600  |
| H | 4.34486500  | 5.67796100  | -5.17049100 | C | 5.21819100  | 1.21134100  | 2.60883200  |
| N | -2.22966200 | 2.08916500  | -0.94026500 | H | 5.28428000  | 2.29691200  | 2.75994500  |
| C | -2.81885000 | 1.67944900  | -2.11573900 | H | 6.10925300  | 0.86073900  | 2.08046700  |
| H | -2.21234400 | 1.39205700  | -2.96331600 | H | 5.15963400  | 0.74821500  | 3.60049400  |
| C | -4.18585700 | 1.69070700  | -1.97065100 | O | 0.49380000  | 0.31988900  | 3.56872300  |
| N | -4.40869300 | 2.13553100  | -0.67211900 | C | -0.41545200 | -0.53518800 | 3.85427900  |
| H | -5.30215200 | 2.03449000  | -0.18204100 | O | -1.06481000 | -1.21882700 | 3.01784900  |
| C | -3.20845300 | 2.34387800  | -0.08494400 | C | -0.72613100 | -0.70182500 | 5.33688000  |
| H | -3.07346000 | 2.64154500  | 0.94452500  | H | -1.29691600 | 0.18754200  | 5.64920600  |
| C | -5.27651700 | 1.33585100  | -2.94778600 | H | -1.38647300 | -1.57008600 | 5.45011500  |
| H | -5.36464000 | 2.11843900  | -3.71655900 | C | 0.52690200  | -0.83453500 | 6.21696900  |
| H | -4.97049400 | 0.42628800  | -3.48399400 | H | 1.16984900  | 0.03823500  | 6.04759800  |
| C | -6.68924200 | 1.12631100  | -2.34501300 | H | 1.10385900  | -1.71349200 | 5.89197500  |
| H | -7.10381600 | 2.08397200  | -2.01017900 | C | 0.18468200  | -0.96341700 | 7.70495100  |
| H | -7.34885700 | 0.74589300  | -3.13710500 | H | -0.36412600 | -0.08124700 | 8.06435400  |

|   |             |             |            |   |             |            |             |
|---|-------------|-------------|------------|---|-------------|------------|-------------|
| H | 1.09314400  | -1.06119400 | 8.31380800 | O | -0.04571700 | 0.56851000 | -1.62024100 |
| H | -0.44298000 | -1.84492400 | 7.89824100 |   |             |            |             |

## W2 (hydroxyl/oxo)-Wx (oxo/hydroxyl)

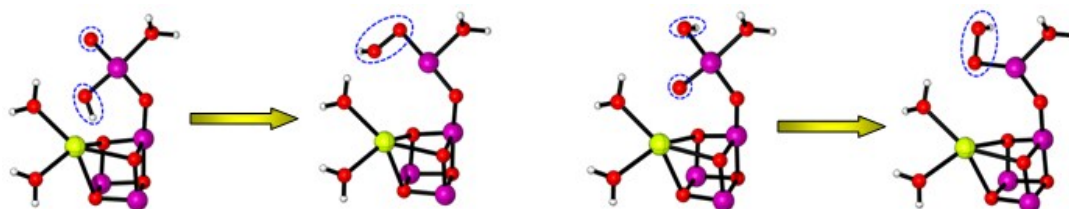

**Fig. S11** Pictorial exhibitions for the closed-cubane Wx (hydroxyl)-W2 (oxo) (left) and W2 (hydroxyl)-Wx (oxo) (right) nucleophilic attack.

W2 (hydroxyl)-Wx (hydroxyl) coupling was inspected to be impracticable because of no observation of the corresponding eigenvector with negative eigenvalue and imaginary vibration of O7-O10 after many attempts.

**Table S25** Reaction parameters for the closed-cubane Wx (hydroxyl)-W2 (oxyl) nucleophilic attack:

| Spin state | Spin topology<br>(Mn1~Mn4-O7)    | Gibbs Free energy (a.u.)              |            |            |
|------------|----------------------------------|---------------------------------------|------------|------------|
|            |                                  | Rea                                   | TS         | Pro        |
| doublet    | $\alpha\alpha\beta\alpha$        | -3366.2173                            | -3366.1596 | -3366.1733 |
|            | $\alpha\beta\alpha\beta$         | -3366.2193                            | -3366.1612 | -3366.1754 |
|            | $\alpha\beta\beta\alpha\alpha$   | -3366.2029                            | -3366.1847 | -3366.2253 |
|            | $\beta\alpha\alpha\beta$         | -3366.2175                            | -3366.1628 | -3366.1761 |
|            | $\beta\alpha\beta\alpha\alpha$   | -3366.2017                            | -3366.1838 | -3366.2240 |
|            | $\beta\beta\alpha\alpha\alpha$   | -3366.2009                            | -3366.1835 | -3366.2236 |
| sextet     | $\alpha\alpha\alpha\beta\beta$   | -3366.2049                            | -3366.1866 | -3366.2270 |
|            | $\alpha\alpha\beta\alpha\beta$   | -3366.2194                            | -3366.1626 | -3366.1774 |
|            | $\alpha\beta\alpha\alpha\beta$   | -3366.2171                            | -3366.1597 | -3366.1736 |
|            | $\beta\alpha\alpha\alpha\beta$   | -3366.2185                            | -3366.1608 | -3366.1746 |
| octet      | $\alpha\alpha\alpha\beta\alpha$  | -3366.2198                            | -3366.1650 | -3366.1788 |
|            | $\alpha\alpha\beta\alpha\alpha$  | -3366.2042                            | -3366.1860 | -3366.2265 |
|            | $\alpha\beta\alpha\alpha\alpha$  | -3366.2018                            | -3366.1836 | -3366.2239 |
|            | $\beta\alpha\alpha\alpha\alpha$  | -3366.2030                            | -3366.1851 | -3366.2250 |
| 12-et      | $\alpha\alpha\alpha\alpha\beta$  | -3366.2197                            | -3366.1633 | -3366.1762 |
| 14-et      | $\alpha\alpha\alpha\alpha\alpha$ | -3366.2047                            | -3366.1864 | -3366.2265 |
| Spin state | Spin topology                    | Relative Gibbs Free energy (kcal/mol) |            |            |

|         | (Mn1~Mn4-O7)                     | $\Delta G^\ddagger(\text{Rea-TS})$ | $\Delta G(\text{Rea-Pro})$ | $\Delta G(\text{Rea})$ | $\Delta G(\text{Pro})$ |
|---------|----------------------------------|------------------------------------|----------------------------|------------------------|------------------------|
| doublet | $\alpha\alpha\beta\alpha$        | 36.2                               | 27.6                       | 1.6                    | 33.7                   |
|         | $\alpha\beta\alpha\beta$         | 36.5                               | 27.5                       | 0.3                    | 32.4                   |
|         | $\alpha\beta\beta\alpha$         | 11.4                               | -14.1                      | 10.6                   | 1.1                    |
|         | $\beta\alpha\alpha\beta$         | 34.3                               | 26.0                       | 1.4                    | 31.9                   |
|         | $\beta\alpha\beta\alpha$         | 11.2                               | -14.0                      | 11.4                   | 1.9                    |
|         | $\beta\beta\alpha\alpha$         | 10.9                               | -14.2                      | 11.9                   | 2.1                    |
| sextet  | $\alpha\alpha\alpha\beta\beta$   | 11.5                               | -13.9                      | 9.3                    | 0.0                    |
|         | $\alpha\alpha\beta\alpha\beta$   | 35.6                               | 26.4                       | 0.3                    | 31.1                   |
|         | $\alpha\beta\alpha\alpha\beta$   | 36.0                               | 27.3                       | 1.7                    | 33.5                   |
|         | $\beta\alpha\alpha\alpha\beta$   | 36.2                               | 27.5                       | 0.8                    | 32.9                   |
| octet   | $\alpha\alpha\alpha\beta\alpha$  | 34.4                               | 25.7                       | 0.0                    | 30.2                   |
|         | $\alpha\alpha\beta\alpha\alpha$  | 11.4                               | -14.0                      | 9.8                    | 0.3                    |
|         | $\alpha\beta\alpha\alpha\alpha$  | 11.4                               | -13.9                      | 11.3                   | 1.9                    |
|         | $\beta\alpha\alpha\alpha\alpha$  | 11.2                               | -13.8                      | 10.5                   | 1.3                    |
| 12-et   | $\alpha\alpha\alpha\alpha\beta$  | 35.4                               | 27.3                       | 0.1                    | 31.9                   |
| 14-et   | $\alpha\alpha\alpha\alpha\alpha$ | 11.5                               | -13.7                      | 9.5                    | 0.3                    |

| Spin state | Spin topology |       | Mulliken spin density |       |       |
|------------|---------------|-------|-----------------------|-------|-------|
|            | (Mn1~Mn4-O7)  |       | Rea                   | TS    | Pro   |
|            |               |       |                       |       |       |
| doublet    | $\alpha$      | Mn1   | 2.93                  | 2.94  | 2.93  |
|            | $\alpha$      | Mn2   | 2.94                  | 2.95  | 2.95  |
|            | $\beta$       | Mn3   | -2.83                 | -2.83 | -2.87 |
|            | $\beta$       | Mn4   | -2.57                 | -2.69 | -1.96 |
|            | $\alpha$      | O7    | 0.59                  | 0.27  | -0.02 |
|            |               | O10   | -0.07                 | 0.40  | 0.01  |
|            | $\alpha$      | Mn1   | 2.93                  | 2.94  | 2.93  |
|            | $\beta$       | Mn2   | -2.94                 | -2.94 | -2.94 |
|            | $\alpha$      | Mn3   | 2.80                  | 2.81  | 2.78  |
|            | $\beta$       | Mn4   | -2.62                 | -2.65 | -1.89 |
|            | $\alpha$      | O7    | 0.72                  | 0.32  | -0.01 |
|            |               | O10   | -0.05                 | 0.39  | 0.01  |
|            | $\alpha$      | Mn1   | 2.92                  | 2.92  | 2.93  |
|            | $\beta$       | Mn2   | -2.93                 | -2.93 | -2.93 |
|            | $\beta$       | Mn3   | -2.84                 | -2.82 | -2.82 |
|            | $\alpha$      | Mn4   | 2.74                  | 3.12  | 3.87  |
|            | $\alpha$      | O7    | 1.04                  | 0.64  | -0.02 |
|            |               | O10   | 0.13                  | 0.17  | 0.01  |
|            | $\beta$       | Mn1   | -2.92                 | -2.92 | -2.92 |
|            | $\alpha$      | Mn2   | 2.93                  | 2.93  | 2.93  |
| $\alpha$   | Mn3           | 2.83  | 2.83                  | 2.80  |       |
| $\beta$    | Mn4           | -2.61 | -2.65                 | -1.88 |       |



|        |          |     |       |       |       |
|--------|----------|-----|-------|-------|-------|
|        | $\alpha$ | O7  | 0.71  | 0.32  | -0.01 |
|        |          | O10 | -0.05 | 0.40  | 0.01  |
|        | $\beta$  | Mn1 | -2.93 | -2.93 | -2.93 |
|        | $\alpha$ | Mn2 | 2.94  | 2.94  | 2.95  |
|        | $\beta$  | Mn3 | -2.82 | -2.80 | -2.80 |
|        | $\alpha$ | Mn4 | 2.75  | 3.12  | 3.87  |
|        | $\alpha$ | O7  | 1.03  | 0.64  | -0.02 |
|        |          | O10 | 0.14  | 0.17  | 0.01  |
|        | $\beta$  | Mn1 | -2.93 | -2.93 | -2.93 |
|        | $\beta$  | Mn2 | -2.95 | -2.95 | -2.95 |
|        | $\alpha$ | Mn3 | 2.84  | 2.85  | 2.85  |
|        | $\alpha$ | Mn4 | 2.79  | 3.22  | 3.92  |
|        | $\alpha$ | O7  | 1.06  | 0.64  | -0.01 |
|        |          | O10 | 0.13  | 0.15  | 0.01  |
|        | $\alpha$ | Mn1 | 2.93  | 2.93  | 2.93  |
|        | $\alpha$ | Mn2 | 2.93  | 2.93  | 2.93  |
|        | $\alpha$ | Mn3 | 2.85  | 2.83  | 2.83  |
|        | $\beta$  | Mn4 | -2.75 | -3.12 | -3.86 |
|        | $\beta$  | O7  | -1.03 | -0.64 | 0.02  |
|        |          | O10 | -0.13 | -0.17 | -0.01 |
|        | $\alpha$ | Mn1 | 2.93  | 2.93  | 2.93  |
|        | $\alpha$ | Mn2 | 2.94  | 2.95  | 2.95  |
|        | $\beta$  | Mn3 | -2.80 | -2.79 | -2.76 |
|        | $\alpha$ | Mn4 | 2.61  | 2.66  | 1.88  |
|        | $\beta$  | O7  | -0.71 | -0.33 | 0.01  |
|        |          | O10 | 0.05  | -0.40 | -0.01 |
| sextet | $\alpha$ | Mn1 | 2.93  | 2.93  | 2.93  |
|        | $\beta$  | Mn2 | -2.93 | -2.94 | -2.94 |
|        | $\alpha$ | Mn3 | 2.85  | 2.85  | 2.88  |
|        | $\alpha$ | Mn4 | 2.57  | 2.68  | 1.96  |
|        | $\beta$  | O7  | -0.59 | -0.27 | 0.02  |
|        |          | O10 | 0.06  | -0.40 | -0.01 |
|        | $\beta$  | Mn1 | -2.92 | -2.93 | -2.92 |
|        | $\alpha$ | Mn2 | 2.93  | 2.93  | 2.93  |
|        | $\alpha$ | Mn3 | 2.87  | 2.87  | 2.91  |
|        | $\alpha$ | Mn4 | 2.57  | 2.69  | 1.96  |
|        | $\beta$  | O7  | -0.59 | -0.27 | 0.02  |
|        |          | O10 | 0.07  | -0.40 | -0.01 |
|        | $\alpha$ | Mn1 | 2.93  | 2.94  | 2.93  |
|        | $\alpha$ | Mn2 | 2.93  | 2.93  | 2.93  |
|        | $\alpha$ | Mn3 | 2.84  | 2.84  | 2.81  |
| octet  | $\beta$  | Mn4 | -2.60 | -2.65 | -1.89 |
|        | $\alpha$ | O7  | 0.71  | 0.32  | -0.01 |
|        |          | O10 | -0.06 | 0.39  | 0.01  |

|       |          |     |       |       |       |
|-------|----------|-----|-------|-------|-------|
|       | $\alpha$ | Mn1 | 2.93  | 2.93  | 2.93  |
|       | $\alpha$ | Mn2 | 2.94  | 2.95  | 2.95  |
|       | $\beta$  | Mn3 | -2.80 | -2.78 | -2.78 |
|       | $\alpha$ | Mn4 | 2.74  | 3.12  | 3.86  |
|       | $\alpha$ | O7  | 1.03  | 0.64  | -0.02 |
|       |          | O10 | 0.13  | 0.16  | 0.01  |
|       | $\alpha$ | Mn1 | 2.93  | 2.93  | 2.93  |
|       | $\beta$  | Mn2 | -2.94 | -2.94 | -2.94 |
|       | $\alpha$ | Mn3 | 2.85  | 2.86  | 2.86  |
|       | $\alpha$ | Mn4 | 2.79  | 3.22  | 3.92  |
|       | $\alpha$ | O7  | 1.06  | 0.65  | -0.01 |
|       |          | O10 | 0.13  | 0.15  | 0.01  |
|       | $\beta$  | Mn1 | -2.92 | -2.92 | -2.92 |
|       | $\alpha$ | Mn2 | 2.93  | 2.93  | 2.94  |
|       | $\alpha$ | Mn3 | 2.88  | 2.89  | 2.89  |
|       | $\alpha$ | Mn4 | 2.79  | 3.22  | 3.92  |
|       | $\alpha$ | O7  | 1.06  | 0.64  | -0.01 |
|       |          | O10 | 0.13  | 0.15  | 0.01  |
| 12-et | $\alpha$ | Mn1 | 2.93  | 2.93  | 2.93  |
|       | $\alpha$ | Mn2 | 2.93  | 2.93  | 2.93  |
|       | $\alpha$ | Mn3 | 2.88  | 2.88  | 2.91  |
|       | $\alpha$ | Mn4 | 2.58  | 2.69  | 1.96  |
|       | $\beta$  | O7  | -0.59 | -0.27 | 0.02  |
|       |          | O10 | 0.06  | -0.40 | -0.01 |
| 14-et | $\alpha$ | Mn1 | 2.93  | 2.93  | 2.93  |
|       | $\alpha$ | Mn2 | 2.93  | 2.93  | 2.93  |
|       | $\alpha$ | Mn3 | 2.88  | 2.89  | 2.90  |
|       | $\alpha$ | Mn4 | 2.79  | 3.22  | 3.92  |
|       | $\alpha$ | O7  | 1.06  | 0.65  | -0.01 |
|       |          | O10 | 0.13  | 0.15  | 0.01  |

**Rea:**

|    |             |             |             |   |             |            |             |
|----|-------------|-------------|-------------|---|-------------|------------|-------------|
| Ca | -2.55146500 | 0.07793100  | -1.23872300 | O | -2.12097400 | 0.75001400 | -3.65621000 |
| Mn | 0.06050700  | -1.76297900 | -0.23131400 | H | -2.81534900 | 1.41209500 | -3.81589400 |
| Mn | -1.50991400 | -0.97591500 | 1.82974100  | H | -1.29635500 | 1.28850800 | -3.54545900 |
| Mn | 0.07472700  | 0.96371100  | 0.69107900  | O | 0.98092500  | 4.23707100 | -2.97835300 |
| Mn | 0.32452100  | 3.26873200  | -1.58259200 | O | 0.52603100  | 5.02709800 | -0.35926300 |
| O  | -1.68169300 | -1.78013600 | 0.21183900  | H | -0.29591200 | 5.46362800 | -0.66653000 |
| O  | 0.31962200  | -0.85777400 | 1.36987600  | H | 0.25423500  | 4.52303100 | 0.44124000  |
| O  | -1.68430600 | 0.63312500  | 1.04868800  | O | -2.93561900 | 2.42597500 | -1.50482400 |
| O  | -0.02179200 | -0.04281100 | -0.91209700 | C | -2.62476600 | 3.62471600 | -1.60949600 |
| O  | -0.23312000 | 2.55161600  | 0.01083100  | O | -1.43538600 | 4.09109600 | -1.82549000 |
| O  | -4.68824100 | -0.65290900 | -2.36226600 | C | -3.73258300 | 4.67961500 | -1.54749200 |
| H  | -5.11475100 | -0.91651100 | -1.52222600 | H | -4.29385100 | 4.59203800 | -2.49074100 |
| H  | -4.27811700 | -1.46416100 | -2.72485300 | H | -4.42554300 | 4.35753500 | -0.75938600 |

|            |             |             |             |    |             |             |             |
|------------|-------------|-------------|-------------|----|-------------|-------------|-------------|
| C          | -3.27719700 | 6.12397500  | -1.33574200 | H  | 4.60913000  | 2.06707500  | 2.01488800  |
| H          | -2.60436500 | 6.45005100  | -2.13701400 | C  | 4.19221800  | 2.18284900  | -0.11060200 |
| H          | -2.75013300 | 6.23896600  | -0.37814400 | H  | 4.56743300  | 1.74078400  | -1.04633500 |
| H          | -4.14106100 | 6.80047900  | -1.31651100 | H  | 4.44062800  | 3.25125400  | -0.16601300 |
| O          | -0.21487600 | -2.71028400 | -1.87936300 | C  | 2.67104000  | 2.06934800  | -0.20980100 |
| C          | -1.30863700 | -2.82318700 | -2.57722000 | O  | 2.07512400  | 1.24062600  | 0.53168000  |
| O          | -2.29207800 | -2.06732400 | -2.49173300 | O  | 2.17228200  | 2.82918800  | -1.10444800 |
| C          | -1.28764500 | -3.98682200 | -3.56180300 | O  | 0.24594900  | -3.46820400 | 0.85301800  |
| H          | -0.38845900 | -3.86926500 | -4.18559300 | C  | -0.35982800 | -3.64925500 | 1.96734800  |
| H          | -1.11732200 | -4.90413500 | -2.97734400 | O  | -1.07686900 | -2.80912500 | 2.58881900  |
| C          | -2.54041300 | -4.11300400 | -4.43189100 | C  | -0.20241800 | -5.03660300 | 2.58098100  |
| H          | -2.69653100 | -3.17184500 | -4.97670200 | H  | 0.83649300  | -5.35366000 | 2.41938900  |
| H          | -3.41894200 | -4.24051600 | -3.78350500 | H  | -0.81685200 | -5.71279300 | 1.96593100  |
| C          | -2.45010700 | -5.28218300 | -5.41892800 | H  | -5.74317400 | -2.35840300 | 2.45826200  |
| H          | -1.59730500 | -5.16293800 | -6.10197900 | C  | -0.60212000 | -5.13522200 | 4.05370000  |
| H          | -3.35843100 | -5.35573300 | -6.03089700 | H  | -0.47940800 | -6.16509100 | 4.41234500  |
| H          | -2.32242700 | -6.24001500 | -4.89496200 | H  | 0.01720500  | -4.47910700 | 4.67768600  |
| N          | 2.09466900  | -1.94036700 | -0.58900600 | H  | -1.64610600 | -4.83743800 | 4.19830300  |
| C          | 2.82680600  | -1.45177400 | -1.64951300 | O  | -4.35248900 | -0.58709900 | 0.36244900  |
| H          | 2.34400300  | -0.95515600 | -2.48015400 | C  | -4.37804400 | -0.97086200 | 1.54964900  |
| C          | 4.16181900  | -1.70948400 | -1.43853800 | O  | -3.34224200 | -1.15101900 | 2.30891200  |
| N          | 4.21173100  | -2.38516200 | -0.22471100 | C  | -5.69745400 | -1.28501400 | 2.23255500  |
| H          | 5.06951700  | -2.51347700 | 0.31984400  | H  | -6.53790900 | -1.00786500 | 1.59037800  |
| C          | 2.95454500  | -2.48364500 | 0.25966400  | H  | -5.75977600 | -0.74999300 | 3.18735800  |
| H          | 2.69383100  | -2.93223700 | 1.20640400  | O  | -1.03077400 | -0.05745600 | 3.53075500  |
| C          | 5.37252800  | -1.39182200 | -2.27861800 | C  | -0.29362200 | 0.98124200  | 3.57583000  |
| H          | 5.43390300  | -2.08441000 | -3.13144100 | O  | 0.25635200  | 1.56942600  | 2.58778800  |
| H          | 5.22671700  | -0.39485300 | -2.71671200 | C  | -0.03387300 | 1.56856900  | 4.95512300  |
| C          | 6.74147500  | -1.44294900 | -1.54543500 | H  | 0.65687100  | 0.88238500  | 5.47066500  |
| H          | 7.03391200  | -2.48193800 | -1.35695800 | H  | 0.48701700  | 2.52516300  | 4.82982700  |
| H          | 7.50277900  | -1.00420200 | -2.20475500 | C  | -1.31124800 | 1.73331900  | 5.79531400  |
| C          | 6.71370800  | -0.74544300 | -0.18706700 | H  | -1.81276800 | 0.76029400  | 5.86941300  |
| O          | 6.55722800  | -1.39009800 | 0.85865800  | H  | -2.00609400 | 2.40314000  | 5.26686900  |
| N          | 6.78655300  | 0.61139700  | -0.19787100 | C  | -1.01901000 | 2.28946000  | 7.19269400  |
| H          | 6.86820400  | 1.07699600  | -1.09373300 | H  | -0.35110600 | 1.62160300  | 7.75482700  |
| C          | 6.37777800  | 1.41208500  | 0.96219800  | H  | -1.94356400 | 2.40233100  | 7.77353800  |
| H          | 6.80234600  | 0.93687900  | 1.85179400  | H  | -0.53555700 | 3.27506700  | 7.14012800  |
| H          | 6.83382200  | 2.40447600  | 0.85609700  | O  | 0.13742100  | 1.89502800  | -2.69063600 |
| C          | 4.84615100  | 1.50968600  | 1.09777500  | H  | 0.34697600  | 1.06740000  | -2.16387500 |
| H          | 4.43632800  | 0.50240200  | 1.23211000  |    |             |             |             |
| <b>TS:</b> |             |             |             |    |             |             |             |
| Ca         | -2.47349500 | -0.09366700 | -1.28525400 | Mn | 0.01326400  | 0.94654500  | 0.67196900  |
| Mn         | 0.19659000  | -1.76174600 | -0.20772900 | Mn | 0.01099600  | 3.32474900  | -1.57562600 |
| Mn         | -1.45717400 | -1.07680100 | 1.81921900  | O  | -1.55172000 | -1.89723900 | 0.20271800  |

|   |             |             |             |   |             |             |             |
|---|-------------|-------------|-------------|---|-------------|-------------|-------------|
| O | 0.37352500  | -0.83907900 | 1.39352900  | H | 2.78526400  | -2.30501800 | 1.56668400  |
| O | -1.72105200 | 0.51255000  | 1.02169200  | C | 5.60872800  | -1.38998800 | -2.02365700 |
| O | 0.01568800  | -0.07724700 | -0.89951300 | H | 5.76171700  | -2.22155100 | -2.72771600 |
| O | -0.42952800 | 2.48715700  | -0.03265300 | H | 5.44324700  | -0.50073800 | -2.64823000 |
| O | -4.53491600 | -0.97049300 | -2.45268900 | C | 6.92727000  | -1.21864700 | -1.22166300 |
| H | -4.95734700 | -1.24856300 | -1.61475700 | H | 7.25769700  | -2.18366000 | -0.82189300 |
| H | -4.05997400 | -1.75638800 | -2.79173200 | H | 7.70696100  | -0.86677400 | -1.91106400 |
| O | -2.15636400 | 0.59103400  | -3.71803500 | C | 6.78756300  | -0.28168400 | -0.02252100 |
| H | -2.94393000 | 1.15127900  | -3.83504400 | O | 6.63721800  | -0.72874600 | 1.12266000  |
| H | -1.41081900 | 1.23430900  | -3.72853900 | N | 6.75821000  | 1.05008400  | -0.28616600 |
| O | 0.48716100  | 4.07718700  | -3.17747300 | H | 6.84430000  | 1.35224700  | -1.24898800 |
| O | 0.25096300  | 5.10831300  | -0.19293000 | C | 6.28882900  | 2.02082100  | 0.70995000  |
| H | -0.61518500 | 5.49712800  | -0.42911700 | H | 6.76970400  | 1.77307300  | 1.66157200  |
| H | 0.04762800  | 4.52067800  | 0.56669800  | H | 6.64574900  | 3.00984700  | 0.39640800  |
| O | -3.05351900 | 2.22402000  | -1.59348800 | C | 4.75805400  | 2.00837700  | 0.87931800  |
| C | -2.90982900 | 3.45899500  | -1.52548600 | H | 4.44466100  | 1.02175400  | 1.23730800  |
| O | -1.78778500 | 4.08954900  | -1.66236100 | H | 4.49090900  | 2.72670100  | 1.66735400  |
| C | -4.14266900 | 4.33737900  | -1.31514500 | C | 4.01868200  | 2.35314700  | -0.41527700 |
| H | -4.76245100 | 4.21969100  | -2.21708400 | H | 4.36566600  | 1.70038700  | -1.23198500 |
| H | -4.71715300 | 3.87345100  | -0.50180100 | H | 4.22233500  | 3.38253100  | -0.73779900 |
| C | -3.87721700 | 5.81695100  | -1.03596000 | C | 2.50009500  | 2.17930100  | -0.38466800 |
| H | -3.31299500 | 6.28057000  | -1.85328900 | O | 1.99605000  | 1.41825500  | 0.48064700  |
| H | -3.30251000 | 5.94994800  | -0.10954500 | O | 1.89963800  | 2.82447500  | -1.31551700 |
| H | -4.82318700 | 6.36092900  | -0.91935500 | O | 0.45124900  | -3.46914100 | 0.90923700  |
| O | 0.04441000  | -2.73938900 | -1.85874900 | C | -0.16730900 | -3.67260200 | 2.00711400  |
| C | -1.01950000 | -2.91775000 | -2.58601800 | O | -0.93778300 | -2.86095500 | 2.61005700  |
| O | -2.04816300 | -2.22009800 | -2.53241300 | C | 0.03459800  | -5.04658000 | 2.63905400  |
| C | -0.90643000 | -4.08318600 | -3.56307800 | H | 1.08106300  | -5.33497600 | 2.47432400  |
| H | 0.00422000  | -3.92205300 | -4.16015800 | H | -0.56524200 | -5.74823600 | 2.03799900  |
| H | -0.70607600 | -4.98723500 | -2.96762400 | H | -5.62201400 | -2.71460500 | 2.31743100  |
| C | -2.12322300 | -4.28107600 | -4.47001900 | C | -0.35368700 | -5.13819800 | 4.11553200  |
| H | -2.31432500 | -3.35215100 | -5.02472800 | H | -0.20096600 | -6.15966900 | 4.48682800  |
| H | -3.01265100 | -4.45313300 | -3.84742600 | H | 0.25135400  | -4.45796300 | 4.72793000  |
| C | -1.94055000 | -5.44796700 | -5.44696500 | H | -1.40434600 | -4.86644400 | 4.26275500  |
| H | -1.07505500 | -5.28624000 | -6.10501200 | O | -4.28037400 | -0.86124300 | 0.27605500  |
| H | -2.82469200 | -5.57324700 | -6.08542300 | C | -4.31271800 | -1.24093000 | 1.46489600  |
| H | -1.77738100 | -6.39517500 | -4.91364200 | O | -3.29012500 | -1.35359300 | 2.25363000  |
| N | 2.25753900  | -1.83046900 | -0.44890700 | C | -5.62867700 | -1.63592000 | 2.11273200  |
| C | 3.03183900  | -1.54256800 | -1.55017200 | H | -6.46844200 | -1.39274200 | 1.45591500  |
| H | 2.57663200  | -1.30821500 | -2.50286000 | H | -5.74066100 | -1.12372900 | 3.07533000  |
| C | 4.36272400  | -1.62324100 | -1.20663100 | O | -1.06396100 | -0.10431300 | 3.51690400  |
| N | 4.36585400  | -1.98952900 | 0.13413500  | C | -0.38805300 | 0.97608600  | 3.55928300  |
| H | 5.19045900  | -1.94787700 | 0.74000700  | O | 0.14364300  | 1.58441500  | 2.57403700  |
| C | 3.08533200  | -2.08230900 | 0.55361900  | C | -0.18709700 | 1.59160300  | 4.93691800  |

|   |             |            |            |   |             |            |             |
|---|-------------|------------|------------|---|-------------|------------|-------------|
| H | 0.52347200  | 0.94590100 | 5.47712500 | H | -0.57115500 | 1.66187500 | 7.72837200  |
| H | 0.28959500  | 2.57095000 | 4.81101500 | H | -2.19935200 | 2.36488900 | 7.70150700  |
| C | -1.48969900 | 1.70436800 | 5.74641200 | H | -0.82052900 | 3.29720700 | 7.08881800  |
| H | -1.94532500 | 0.70908000 | 5.82132300 | O | -0.03430100 | 2.30408300 | -3.24391400 |
| H | -2.20371900 | 2.33360600 | 5.19405000 | H | 0.88346100  | 2.00960000 | -3.40058700 |
| C | -1.25730000 | 2.29008500 | 7.14293200 |   |             |            |             |

**Pro:**

|    |             |             |             |   |             |             |             |
|----|-------------|-------------|-------------|---|-------------|-------------|-------------|
| Ca | -2.37669900 | 0.16384400  | -1.35051800 | H | -1.51778600 | -1.59525700 | -5.91327900 |
| Mn | 0.34707100  | -1.63716500 | -0.57300800 | H | -2.27414700 | -3.04268300 | -5.26600600 |
| Mn | -1.50857000 | -1.65772400 | 1.38904400  | C | -0.98068700 | -3.41683800 | -6.96338100 |
| Mn | -0.14158000 | 0.70481700  | 0.98674300  | H | -0.06051300 | -3.02591100 | -7.42016900 |
| Mn | -0.32920700 | 3.36193500  | -0.81398000 | H | -1.78274000 | -3.33437100 | -7.70818400 |
| O  | -1.41429200 | -1.97562200 | -0.39941600 | H | -0.82119100 | -4.48541700 | -6.76166100 |
| O  | 0.32385800  | -1.19836000 | 1.22698800  | N | 2.42406600  | -1.53562800 | -0.57420300 |
| O  | -1.84890700 | 0.07391000  | 1.05707400  | C | 3.31150900  | -1.14152200 | -1.54996800 |
| O  | 0.07835900  | 0.15114900  | -0.78457300 | H | 2.96487800  | -0.86910200 | -2.53760400 |
| O  | -0.70406100 | 2.32743400  | 0.62780600  | C | 4.59265500  | -1.18379000 | -1.04622700 |
| O  | -4.16271300 | -0.47630800 | -3.00108900 | N | 4.44990100  | -1.64048500 | 0.25881900  |
| H  | -4.66425800 | -1.00681800 | -2.34952600 | H | 5.19184100  | -1.61825600 | 0.96370800  |
| H  | -3.58873200 | -1.10442100 | -3.48402600 | C | 3.13425300  | -1.81832400 | 0.50754000  |
| O  | -1.20460400 | 1.91076000  | -2.74735700 | H | 2.71988000  | -2.11090700 | 1.46139200  |
| H  | -1.76545900 | 2.65644500  | -3.02898100 | C | 5.91324600  | -0.82800200 | -1.68162400 |
| H  | -0.32083500 | 2.10951800  | -3.14638100 | H | 6.20376400  | -1.59812100 | -2.41174700 |
| O  | 0.12188000  | 4.31962000  | -2.36037200 | H | 5.76975400  | 0.09232200  | -2.26535100 |
| O  | -0.11585000 | 4.99258000  | 0.87750800  | C | 7.10930800  | -0.64191800 | -0.70910500 |
| H  | -0.99435000 | 5.37259200  | 0.67952800  | H | 7.46090400  | -1.61463000 | -0.34825700 |
| H  | -0.31216600 | 4.25964800  | 1.49928500  | H | 7.93773300  | -0.18154100 | -1.26483600 |
| O  | -3.42426600 | 2.32983900  | -1.09580600 | C | 6.76265500  | 0.17266300  | 0.53717900  |
| C  | -3.27161300 | 3.53245900  | -0.80174900 | O | 6.54068100  | -0.38444400 | 1.62083700  |
| O  | -2.14090800 | 4.16451200  | -0.82578600 | N | 6.63497100  | 1.51466900  | 0.37886400  |
| C  | -4.50156100 | 4.35735400  | -0.42839700 | H | 6.79469800  | 1.91186100  | -0.53884400 |
| H  | -5.12051700 | 4.41857000  | -1.33651900 | C | 6.02268800  | 2.35884000  | 1.41255300  |
| H  | -5.08121300 | 3.74884600  | 0.27885300  | H | 6.49113000  | 2.10467900  | 2.36923000  |
| C  | -4.22910700 | 5.75377000  | 0.13139900  | H | 6.28037000  | 3.39857500  | 1.17541500  |
| H  | -3.66255900 | 6.36433300  | -0.58116400 | C | 4.49759600  | 2.17556400  | 1.51882200  |
| H  | -3.65329500 | 5.70250300  | 1.06525500  | H | 4.27983300  | 1.14571300  | 1.82013500  |
| H  | -5.17210800 | 6.27025300  | 0.35194500  | H | 4.13043900  | 2.82311900  | 2.32756800  |
| O  | 0.43287600  | -2.09001300 | -2.44881100 | C | 3.76588500  | 2.50316200  | 0.21505900  |
| C  | -0.51092500 | -1.98472000 | -3.33231300 | H | 4.18115700  | 1.90028100  | -0.60825200 |
| O  | -1.55623900 | -1.31882600 | -3.19456200 | H | 3.90028800  | 3.55541100  | -0.06921900 |
| C  | -0.23522100 | -2.75410000 | -4.62112100 | C | 2.26587800  | 2.21834600  | 0.20832000  |
| H  | 0.72432900  | -2.38875600 | -5.01911800 | O | 1.80121800  | 1.38285400  | 1.02626600  |
| H  | -0.05135700 | -3.80233500 | -4.34096800 | O | 1.61197800  | 2.86218300  | -0.68945100 |
| C  | -1.33375400 | -2.65344800 | -5.68195800 | O | 0.63566600  | -3.58332100 | 0.02226100  |

|   |             |             |             |   |             |             |             |
|---|-------------|-------------|-------------|---|-------------|-------------|-------------|
| C | -0.03964000 | -4.12376400 | 0.95899700  | O | -1.31530300 | -1.16857200 | 3.31859800  |
| O | -0.90823200 | -3.55749500 | 1.69653700  | C | -0.74007000 | -0.10105400 | 3.71309100  |
| C | 0.21969300  | -5.60839700 | 1.19629100  | O | -0.18650500 | 0.78718000  | 2.98379000  |
| H | 1.29895200  | -5.77532200 | 1.08233900  | C | -0.70975700 | 0.12851200  | 5.21688700  |
| H | -0.25306500 | -6.13822100 | 0.35428600  | H | -0.07033300 | -0.65406200 | 5.65406600  |
| H | -5.52593500 | -3.62737800 | 1.04169300  | H | -0.23320900 | 1.09666200  | 5.41005500  |
| C | -0.29929700 | -6.14774000 | 2.52988400  | C | -2.10729700 | 0.05955300  | 5.85770500  |
| H | -0.09173600 | -7.22232700 | 2.61266400  | H | -2.55843200 | -0.91083600 | 5.61473100  |
| H | 0.17999400  | -5.64067400 | 3.37651600  | H | -2.75036700 | 0.82728700  | 5.40188300  |
| H | -1.37952100 | -5.99277900 | 2.62304600  | C | -2.06041900 | 0.25924400  | 7.37593900  |
| O | -4.20830500 | -1.19730100 | -0.32256200 | H | -1.44835300 | -0.51485800 | 7.85994300  |
| C | -4.30110400 | -1.89291000 | 0.70929700  | H | -3.06676700 | 0.20963800  | 7.81170300  |
| O | -3.33922100 | -2.15279400 | 1.54054300  | H | -1.63028900 | 1.23570400  | 7.63931700  |
| C | -5.62359300 | -2.53511700 | 1.09105300  | O | 0.95841000  | 3.44830300  | -3.17885400 |
| H | -6.41920000 | -2.20468900 | 0.41770600  | H | 1.70323700  | 3.28602100  | -2.55437700 |
| H | -5.87626200 | -2.27876100 | 2.12664200  |   |             |             |             |

**Table S26** Reaction parameters for the closed-cubane W2 (hydroxyl)-Wx (oxyl) nucleophilic attack:

| Spin state | Spin topology<br>(Mn1~Mn4-O7/O10) | Gibbs Free energy (a.u.) |            |            |
|------------|-----------------------------------|--------------------------|------------|------------|
|            |                                   | Rea                      | TS         | Pro        |
| doublet    | $\alpha\alpha\beta\alpha$         | -3366.2506               | -3366.1785 | -3366.1807 |
|            | $\alpha\beta\alpha\alpha$         | -3366.2510               | -3366.1802 | -3366.1831 |
|            | $\alpha\beta\beta\alpha$          | -3366.2116               | -3366.1906 | -3366.2130 |
|            | $\beta\alpha\alpha\beta$          | -3366.2493               | -3366.1796 | -3366.1826 |
|            | $\beta\alpha\beta\alpha$          | -3366.2113               | -3366.1892 | -3366.2115 |
|            | $\beta\beta\alpha\alpha$          | -3366.2088               | -3366.1885 | -3366.2129 |
| sextet     | $\alpha\alpha\alpha\beta\beta$    | -3366.2140               | -3366.1927 | -3366.2155 |
|            | $\alpha\alpha\beta\alpha\beta$    | -3366.2522               | -3366.1811 | -3366.1837 |
|            | $\alpha\beta\alpha\alpha\beta$    | -3366.2503               | -3366.1785 | -3366.1825 |
|            | $\beta\alpha\alpha\alpha\beta$    | -3366.2481               | -3366.1787 | -3366.1815 |
| octet      | $\alpha\alpha\alpha\beta\alpha$   | -3366.2535               | -3366.1822 | -3366.1849 |
|            | $\alpha\alpha\beta\alpha\alpha$   | -3366.2131               | -3366.1919 | -3366.2146 |
|            | $\alpha\beta\alpha\alpha\alpha$   | -3366.2095               | -3366.1887 | -3366.2122 |
|            | $\beta\alpha\alpha\alpha\alpha$   | -3366.2101               | -3366.1900 | -3366.2142 |
| 12-et      | $\alpha\alpha\alpha\alpha\beta$   | -3366.2517               | -3366.1819 | -3366.1854 |
| 14-et      | $\alpha\alpha\alpha\alpha\alpha$  | -3366.2121               | -3366.1917 | -3366.2159 |

  

| Spin state | Spin topology<br>(Mn1~Mn4-O7/O10) | Relative Gibbs Free energy (kcal/mol) |                            |                        |                        |
|------------|-----------------------------------|---------------------------------------|----------------------------|------------------------|------------------------|
|            |                                   | $\Delta G^\ddagger(\text{Rea-TS})$    | $\Delta G(\text{Rea-Pro})$ | $\Delta G(\text{Rea})$ | $\Delta G(\text{Pro})$ |
| doublet    | $\alpha\alpha\beta\alpha$         | 45.2                                  | 43.9                       | 1.8                    | 22.1                   |
|            | $\alpha\beta\alpha\alpha$         | 44.4                                  | 42.6                       | 1.6                    | 20.6                   |

|        |                                  |      |      |      |      |
|--------|----------------------------------|------|------|------|------|
|        | $\alpha\beta\beta\alpha$         | 13.2 | -0.9 | 26.3 | 1.8  |
|        | $\beta\alpha\beta\alpha$         | 43.7 | 41.9 | 2.6  | 20.9 |
|        | $\beta\alpha\beta\alpha\alpha$   | 13.9 | -0.1 | 26.5 | 2.8  |
|        | $\beta\beta\alpha\alpha\alpha$   | 12.7 | -2.6 | 28.0 | 1.9  |
| sextet | $\alpha\alpha\alpha\beta\beta$   | 13.4 | -0.9 | 24.8 | 0.3  |
|        | $\alpha\alpha\beta\alpha\beta$   | 44.6 | 43.0 | 0.8  | 20.2 |
|        | $\alpha\beta\alpha\alpha\beta$   | 45.1 | 42.5 | 2.0  | 21.0 |
|        | $\beta\alpha\alpha\alpha\beta$   | 43.5 | 41.8 | 3.4  | 21.6 |
| octet  | $\alpha\alpha\alpha\beta\alpha$  | 44.7 | 43.0 | 0.0  | 19.5 |
|        | $\alpha\alpha\beta\alpha\alpha$  | 13.3 | -0.9 | 25.4 | 0.8  |
|        | $\alpha\beta\alpha\alpha\alpha$  | 13.1 | -1.7 | 27.6 | 2.3  |
|        | $\beta\alpha\alpha\alpha\alpha$  | 12.6 | -2.6 | 27.2 | 1.1  |
| 12-et  | $\alpha\alpha\alpha\alpha\beta$  | 43.8 | 41.6 | 1.1  | 19.1 |
| 14-et  | $\alpha\alpha\alpha\alpha\alpha$ | 12.8 | -2.4 | 26.0 | 0.0  |

| Spin state | Spin topology    |       | Mulliken spin density |       |       |
|------------|------------------|-------|-----------------------|-------|-------|
|            | (Mn1~Mn4-O7/O10) |       | Rea                   | TS    | Pro   |
| doublet    | $\alpha$         | Mn1   | 2.92                  | 2.93  | 2.93  |
|            | $\alpha$         | Mn2   | 2.94                  | 2.95  | 2.95  |
|            | $\beta$          | Mn3   | -2.91                 | -2.84 | -2.84 |
|            | $\beta$          | Mn4   | -1.87                 | -2.43 | -2.01 |
|            | $\alpha$         | O7    | 0.04                  | 0.33  | 0.01  |
|            | $\alpha$         | O10   | -0.16                 | 0.09  | 0.00  |
|            | $\alpha$         | Mn1   | 2.93                  | 2.96  | 2.93  |
|            | $\beta$          | Mn2   | -2.93                 | -2.93 | -2.94 |
|            | $\alpha$         | Mn3   | 2.88                  | 2.91  | 2.93  |
|            | $\beta$          | Mn4   | -1.81                 | -2.40 | -1.99 |
|            | $\alpha$         | O7    | 0.06                  | 0.35  | 0.03  |
|            | $\alpha$         | O10   | -0.13                 | 0.10  | -0.01 |
|            | $\alpha$         | Mn1   | 2.92                  | 2.92  | 2.91  |
|            | $\beta$          | Mn2   | -2.93                 | -2.93 | -2.93 |
|            | $\beta$          | Mn3   | -2.83                 | -2.83 | -2.82 |
|            | $\alpha$         | Mn4   | 2.63                  | 3.34  | 3.78  |
|            | $\alpha$         | O7    | 0.33                  | 0.21  | -0.02 |
|            | $\alpha$         | O10   | 0.86                  | 0.33  | 0.09  |
|            | $\beta$          | Mn1   | -2.91                 | -2.90 | -2.91 |
|            | $\alpha$         | Mn2   | 2.93                  | 2.93  | 2.93  |
| $\alpha$   | Mn3              | 2.90  | 2.91                  | 2.95  |       |
| $\beta$    | Mn4              | -1.80 | -2.39                 | -1.98 |       |
| $\alpha$   | O7               | 0.06  | 0.35                  | 0.03  |       |
| $\alpha$   | O10              | -0.13 | 0.10                  | -0.01 |       |
| $\beta$    | Mn1              | -2.92 | -2.92                 | -2.92 |       |
| $\alpha$   | Mn2              | 2.93  | 2.93                  | 2.94  |       |
| $\beta$    | Mn3              | -2.82 | -2.82                 | -2.81 |       |

|        |          |     |       |       |       |
|--------|----------|-----|-------|-------|-------|
|        | $\alpha$ | Mn4 | 2.64  | 3.34  | 3.78  |
|        | $\alpha$ | O7  | 0.33  | 0.21  | -0.02 |
|        |          | O10 | 0.86  | 0.33  | 0.09  |
|        | $\beta$  | Mn1 | -2.92 | -2.92 | -2.92 |
|        | $\beta$  | Mn2 | -2.94 | -2.94 | -2.94 |
|        | $\alpha$ | Mn3 | 2.87  | 2.89  | 2.90  |
|        | $\alpha$ | Mn4 | -2.71 | 3.40  | 3.86  |
|        | $\alpha$ | O7  | 0.38  | 0.24  | -0.02 |
|        |          | O10 | 0.84  | 0.33  | 0.08  |
|        | $\alpha$ | Mn1 | 2.92  | 2.92  | 2.92  |
|        | $\alpha$ | Mn2 | 2.93  | 2.93  | 2.93  |
|        | $\alpha$ | Mn3 | 2.84  | 2.84  | 2.84  |
|        | $\beta$  | Mn4 | -2.64 | -3.34 | -3.78 |
|        | $\beta$  | O7  | -0.33 | -0.21 | 0.02  |
|        |          | O10 | -0.86 | -0.33 | -0.09 |
|        | $\alpha$ | Mn1 | 2.92  | 2.91  | 2.92  |
|        | $\alpha$ | Mn2 | 2.94  | 2.95  | 2.95  |
|        | $\beta$  | Mn3 | -2.87 | -2.87 | -2.90 |
|        | $\alpha$ | Mn4 | 1.80  | 2.39  | 1.98  |
|        | $\beta$  | O7  | -0.06 | -0.36 | -0.03 |
|        |          | O10 | 0.13  | -0.10 | 0.01  |
| sextet | $\alpha$ | Mn1 | 2.92  | 2.92  | 2.93  |
|        | $\beta$  | Mn2 | -2.92 | -2.94 | -2.94 |
|        | $\alpha$ | Mn3 | 2.92  | 2.86  | 2.86  |
|        | $\alpha$ | Mn4 | 1.87  | 2.43  | 2.01  |
|        | $\beta$  | O7  | -0.04 | -0.33 | -0.01 |
|        |          | O10 | 0.16  | -0.10 | 0.00  |
|        | $\beta$  | Mn1 | -2.91 | -2.92 | -2.92 |
|        | $\alpha$ | Mn2 | 2.92  | 2.93  | 2.93  |
|        | $\alpha$ | Mn3 | 2.93  | 2.88  | 2.88  |
|        | $\alpha$ | Mn4 | 1.87  | 2.43  | 2.01  |
|        | $\beta$  | O7  | -0.04 | -0.33 | -0.01 |
|        |          | O10 | 0.16  | -0.09 | 0.00  |
|        | $\alpha$ | Mn1 | 2.93  | 2.95  | 2.93  |
|        | $\alpha$ | Mn2 | 2.92  | 2.93  | 2.93  |
|        | $\alpha$ | Mn3 | 2.89  | 2.93  | 2.96  |
|        | $\beta$  | Mn4 | -1.80 | -2.39 | -1.98 |
|        | $\alpha$ | O7  | 0.06  | 0.35  | 0.03  |
|        |          | O10 | -0.13 | 0.10  | -0.01 |
| octet  | $\alpha$ | Mn1 | 2.93  | 2.93  | 2.92  |
|        | $\alpha$ | Mn2 | 2.94  | 2.94  | 2.94  |
|        | $\beta$  | Mn3 | -2.79 | -2.79 | -2.79 |
|        | $\alpha$ | Mn4 | 2.63  | 3.34  | 3.78  |
|        | $\alpha$ | O7  | 0.33  | 0.21  | -0.02 |



|       |          |     |       |       |       |
|-------|----------|-----|-------|-------|-------|
|       |          | O10 | 0.86  | 0.33  | 0.09  |
|       | $\alpha$ | Mn1 | 2.93  | 2.94  | 2.92  |
|       | $\beta$  | Mn2 | -2.93 | -2.93 | -2.93 |
|       | $\alpha$ | Mn3 | 2.89  | 2.91  | 2.92  |
|       | $\alpha$ | Mn4 | 2.71  | 3.40  | 3.86  |
|       | $\alpha$ | O7  | 0.38  | 0.24  | -0.02 |
|       |          | O10 | 0.84  | 0.33  | 0.08  |
|       | $\beta$  | Mn1 | -2.91 | -2.91 | -2.91 |
|       | $\alpha$ | Mn2 | 2.93  | 2.93  | 2.93  |
|       | $\alpha$ | Mn3 | 2.90  | 2.92  | 2.93  |
|       | $\alpha$ | Mn4 | 2.71  | 3.40  | 3.86  |
|       | $\alpha$ | O7  | 0.38  | 0.24  | -0.02 |
|       |          | O10 | 0.84  | 0.33  | 0.08  |
| 12-et | $\alpha$ | Mn1 | 2.92  | 2.92  | 2.93  |
|       | $\alpha$ | Mn2 | 2.92  | 2.93  | 2.93  |
|       | $\alpha$ | Mn3 | 2.94  | 2.89  | 2.90  |
|       | $\alpha$ | Mn4 | 1.87  | 2.43  | 2.01  |
|       | $\beta$  | O7  | -0.04 | -0.33 | -0.01 |
|       |          | O10 | 0.16  | -0.09 | 0.00  |
| 14-et | $\alpha$ | Mn1 | 2.93  | 2.93  | 2.93  |
|       | $\alpha$ | Mn2 | 2.93  | 2.93  | 2.93  |
|       | $\alpha$ | Mn3 | 2.92  | 2.93  | 2.94  |
|       | $\alpha$ | Mn4 | 2.71  | 3.40  | 3.86  |
|       | $\alpha$ | O7  | 0.38  | 0.24  | -0.02 |
|       |          | O10 | 0.84  | 0.33  | 0.08  |

**Rea:**

|    |             |             |             |   |             |             |             |
|----|-------------|-------------|-------------|---|-------------|-------------|-------------|
| Ca | -2.27540500 | -0.33457600 | -1.68948100 | O | -0.94957900 | 4.97405400  | 0.41246100  |
| Mn | 0.43329100  | -1.74092300 | -0.33309500 | H | -1.78917800 | 5.20973500  | -0.03281000 |
| Mn | -1.58283500 | -1.53758600 | 1.45891900  | H | -1.19824000 | 4.28924100  | 1.06859600  |
| Mn | -0.32307200 | 0.79006000  | 0.73258700  | O | -3.12740000 | 1.91213100  | -1.95049000 |
| Mn | -0.33498700 | 3.50187700  | -1.08607600 | C | -3.14454400 | 3.15415600  | -1.92268000 |
| O  | -1.30820200 | -2.18708400 | -0.20190200 | O | -2.12614600 | 3.92968800  | -1.70896000 |
| O  | 0.22695100  | -0.96261900 | 1.34633600  | C | -4.45829200 | 3.88339500  | -2.21363800 |
| O  | -1.99003500 | 0.07379300  | 0.76400500  | H | -4.60326400 | 3.82846100  | -3.30412400 |
| O  | 0.07191200  | -0.03871700 | -0.88911800 | H | -5.26023000 | 3.27592700  | -1.77534600 |
| O  | -0.92473700 | 2.31816500  | 0.09053400  | C | -4.53620200 | 5.33815700  | -1.74738700 |
| O  | -3.99260800 | -1.34622500 | -3.23949700 | H | -3.74634500 | 5.94368600  | -2.20564200 |
| H  | -4.49425200 | -1.75820400 | -2.50717800 | H | -4.43365600 | 5.41257800  | -0.65568500 |
| H  | -3.36067000 | -2.02882300 | -3.54674400 | H | -5.50588400 | 5.77605000  | -2.01620800 |
| O  | -1.33321000 | 0.69967100  | -3.79621700 | O | 0.61149800  | -2.59406900 | -2.05015900 |
| H  | -2.05590800 | 1.26035800  | -4.12681800 | C | -0.30311900 | -2.83597500 | -2.94142700 |
| H  | -0.68851100 | 1.35287800  | -3.42270000 | O | -1.41445300 | -2.27703300 | -2.99740300 |
| O  | 0.33268000  | 4.71631300  | -2.33429800 | C | 0.08587100  | -3.89163000 | -3.96899600 |
| H  | 1.29729200  | 4.74667300  | -2.17725100 | H | 0.12716400  | -4.86001400 | -3.44558400 |

|   |             |             |             |   |             |             |             |
|---|-------------|-------------|-------------|---|-------------|-------------|-------------|
| H | -0.71626100 | -3.94947500 | -4.71471800 | C | 1.99477700  | 2.70621400  | 0.52802000  |
| C | 1.44264400  | -3.62476700 | -4.64294400 | O | 1.54273500  | 1.60227700  | 0.92721300  |
| H | 2.21369500  | -3.55394700 | -3.86497300 | O | 1.41969900  | 3.57760400  | -0.21299000 |
| H | 1.40925900  | -2.64554900 | -5.14363200 | O | 0.85540000  | -3.46456600 | 0.69071500  |
| C | 1.81338500  | -4.71053000 | -5.65857300 | C | 0.13955600  | -3.87286800 | 1.66820200  |
| H | 1.88353100  | -5.69683800 | -5.17832300 | O | -0.85905700 | -3.27971300 | 2.18164300  |
| H | 2.78241800  | -4.49898000 | -6.12953600 | C | 0.52757800  | -5.22744100 | 2.25285000  |
| H | 1.06336000  | -4.78382000 | -6.45841900 | H | 1.62433000  | -5.26144600 | 2.30382500  |
| N | 2.46893900  | -1.40925100 | -0.41727100 | H | 0.24367600  | -5.97825100 | 1.49889900  |
| C | 3.11272500  | -0.50736300 | -1.23809400 | H | -5.44725100 | -3.80542400 | 1.09479600  |
| H | 2.54942000  | 0.10310500  | -1.93155100 | C | -0.10919000 | -5.55157700 | 3.60463100  |
| C | 4.46220900  | -0.54471000 | -0.97795600 | H | 0.20721600  | -6.54573400 | 3.94530700  |
| N | 4.61638900  | -1.50662600 | 0.01622500  | H | 0.18338700  | -4.81860100 | 4.36639500  |
| H | 5.44478500  | -1.57191800 | 0.61113600  | H | -1.20232400 | -5.53764900 | 3.53763400  |
| C | 3.39255300  | -1.98449100 | 0.33708800  | O | -4.13993400 | -1.52859000 | -0.49154500 |
| H | 3.19733900  | -2.72481600 | 1.09893700  | C | -4.28459400 | -2.06141500 | 0.62705000  |
| C | 5.60747300  | 0.20943200  | -1.60028200 | O | -3.38385000 | -2.13014000 | 1.55962900  |
| H | 5.91183700  | -0.26984900 | -2.54320100 | C | -5.59931500 | -2.72184000 | 1.00430100  |
| H | 5.23904100  | 1.20595300  | -1.87905000 | H | -6.36121400 | -2.52050700 | 0.24622400  |
| C | 6.88165900  | 0.34883200  | -0.72111100 | H | -5.93390200 | -2.35815800 | 1.98274200  |
| H | 7.42537700  | -0.60186200 | -0.68519900 | O | -1.60792000 | -0.70270100 | 3.27553300  |
| H | 7.54808500  | 1.08744200  | -1.18722800 | C | -1.13888900 | 0.45747800  | 3.51421000  |
| C | 6.55309200  | 0.72128500  | 0.72200400  | O | -0.58771600 | 1.24557400  | 2.67706500  |
| O | 6.46450700  | -0.14419800 | 1.60103200  | C | -1.22917600 | 0.94321000  | 4.95432500  |
| N | 6.28856100  | 2.03529900  | 0.95894000  | H | -0.44591300 | 0.41156400  | 5.51855400  |
| H | 6.33697100  | 2.67483200  | 0.17508500  | H | -0.97499500 | 2.00982200  | 4.97442500  |
| C | 5.57418200  | 2.47583500  | 2.16129300  | C | -2.59575500 | 0.68081900  | 5.60677900  |
| H | 5.96609900  | 1.89230900  | 2.99977300  | H | -2.81986700 | -0.39092000 | 5.53799800  |
| H | 5.82709400  | 3.53005800  | 2.33321300  | H | -3.37634700 | 1.19920800  | 5.02989700  |
| C | 4.05146600  | 2.27378700  | 2.04688800  | C | -2.64027600 | 1.14162900  | 7.06735000  |
| H | 3.84436800  | 1.20818100  | 1.89775900  | H | -1.89083600 | 0.61372500  | 7.67390700  |
| H | 3.58581400  | 2.55148400  | 3.00305300  | H | -3.62501100 | 0.94867400  | 7.51240900  |
| C | 3.42749400  | 3.08407200  | 0.90771800  | H | -2.43949400 | 2.21865700  | 7.15571200  |
| H | 4.00739700  | 2.94899000  | -0.01930900 | O | 0.21018500  | 2.42100900  | -2.32543800 |
| H | 3.44192200  | 4.16190400  | 1.11801200  |   |             |             |             |

**TS:**

|    |             |             |             |   |             |             |             |
|----|-------------|-------------|-------------|---|-------------|-------------|-------------|
| Ca | -2.28049000 | -0.07617100 | -1.72524300 | O | 0.06461700  | 0.09671200  | -0.83061900 |
| Mn | 0.35851300  | -1.66401700 | -0.44407400 | O | -0.84151500 | 2.38890500  | 0.35457800  |
| Mn | -1.70145300 | -1.57860600 | 1.31133900  | O | -3.98592100 | -0.88534000 | -3.40419000 |
| Mn | -0.34509100 | 0.76181900  | 0.87236300  | H | -4.51415700 | -1.35787500 | -2.72976200 |
| Mn | -0.11571000 | 3.37408200  | -0.89964500 | H | -3.36334800 | -1.54719200 | -3.76943900 |
| O  | -1.39818200 | -2.06635700 | -0.40062700 | O | -1.37290700 | 1.13234500  | -3.75564500 |
| O  | 0.12780300  | -1.05771500 | 1.30324300  | H | -2.08355100 | 1.75377800  | -3.98859400 |
| O  | -2.03441200 | 0.11091400  | 0.77423100  | H | -0.64094200 | 1.71833800  | -3.42515600 |

|   |             |             |             |   |             |             |             |
|---|-------------|-------------|-------------|---|-------------|-------------|-------------|
| O | 0.72509000  | 4.25132400  | -2.45405000 | N | 6.35873300  | 1.67814400  | 1.31884000  |
| H | 1.68433800  | 4.22750300  | -2.26398100 | H | 6.44461100  | 2.39467200  | 0.60815200  |
| O | -0.51381900 | 5.27426800  | 0.46156200  | C | 5.62288300  | 2.01320300  | 2.54278000  |
| H | -1.35721100 | 5.39976100  | -0.02005700 | H | 5.97523700  | 1.33562600  | 3.32625100  |
| H | -0.75746400 | 4.73691300  | 1.23940100  | H | 5.89875700  | 3.03629000  | 2.82906900  |
| O | -3.11277400 | 2.18450200  | -1.73873100 | C | 4.09935000  | 1.86716400  | 2.36681100  |
| C | -2.99292200 | 3.41978500  | -1.65169900 | H | 3.87228700  | 0.82836700  | 2.10180700  |
| O | -1.87456000 | 4.05816900  | -1.50545500 | H | 3.61042300  | 2.05394200  | 3.33292100  |
| C | -4.24610400 | 4.28822700  | -1.77718900 | C | 3.53109100  | 2.80784200  | 1.30095000  |
| H | -4.56512100 | 4.21814600  | -2.82869700 | H | 4.15625700  | 2.79040100  | 0.39513900  |
| H | -5.03314700 | 3.78752700  | -1.19817300 | H | 3.53124300  | 3.85340000  | 1.64060600  |
| C | -4.09556800 | 5.75303400  | -1.36520300 | C | 2.11756300  | 2.49098300  | 0.81105000  |
| H | -3.31957600 | 6.25448600  | -1.95485900 | O | 1.55775600  | 1.44213900  | 1.22255000  |
| H | -3.82778900 | 5.84351900  | -0.30333300 | O | 1.65477200  | 3.34889700  | -0.01774100 |
| H | -5.03983000 | 6.29279000  | -1.51172300 | O | 0.69996600  | -3.49493800 | 0.40981400  |
| O | 0.56375500  | -2.35112200 | -2.23100000 | C | -0.05460900 | -3.97704000 | 1.32251800  |
| C | -0.33144000 | -2.48756900 | -3.16369200 | O | -1.04939700 | -3.40765400 | 1.86885100  |
| O | -1.42731900 | -1.89773100 | -3.19548000 | C | 0.27668100  | -5.39578400 | 1.77491000  |
| C | 0.06246800  | -3.45261600 | -4.27495900 | H | 1.37038600  | -5.47301800 | 1.84104600  |
| H | 0.07691200  | -4.46525500 | -3.84175100 | H | -0.01671400 | -6.05732900 | 0.94476600  |
| H | -0.72370600 | -3.42718000 | -5.03920700 | H | -5.61547400 | -3.68620100 | 0.67913400  |
| C | 1.43792000  | -3.14928700 | -4.89357600 | C | -0.39829000 | -5.83057600 | 3.07621100  |
| H | 2.19276000  | -3.16404900 | -4.09679100 | H | -0.12271600 | -6.86448000 | 3.32036600  |
| H | 1.43108000  | -2.12781300 | -5.30249200 | H | -0.09662700 | -5.18843400 | 3.91278400  |
| C | 1.81359800  | -4.14365100 | -5.99719100 | H | -1.48870000 | -5.77087700 | 2.99236600  |
| H | 1.85690900  | -5.17105900 | -5.60865800 | O | -4.20472800 | -1.32290200 | -0.69139600 |
| H | 2.79622400  | -3.90739400 | -6.42643600 | C | -4.39365800 | -1.94631800 | 0.37182200  |
| H | 1.08050100  | -4.12933800 | -6.81573700 | O | -3.51857900 | -2.12312600 | 1.31485800  |
| N | 2.40671300  | -1.39937400 | -0.45268800 | C | -5.73598000 | -2.59515700 | 0.66106200  |
| C | 3.10395700  | -0.44750700 | -1.16708800 | H | -6.46812300 | -2.31849000 | -0.10249400 |
| H | 2.58029000  | 0.25941900  | -1.79793600 | H | -6.09153800 | -2.29142400 | 1.65255800  |
| C | 4.44678200  | -0.57920600 | -0.90110000 | O | -1.75666600 | -0.93523400 | 3.20110100  |
| N | 4.54105100  | -1.64880900 | -0.01543800 | C | -1.26319300 | 0.18027900  | 3.57019800  |
| H | 5.35754000  | -1.81967300 | 0.57498000  | O | -0.65646400 | 1.02611100  | 2.83476400  |
| C | 3.29149700  | -2.09734300 | 0.24215200  | C | -1.40035200 | 0.52747600  | 5.04559200  |
| H | 3.05087700  | -2.90607200 | 0.91641300  | H | -0.68935300 | -0.11237100 | 5.59246800  |
| C | 5.63656200  | 0.17868300  | -1.42861000 | H | -1.07987200 | 1.56664000  | 5.18598000  |
| H | 5.92960900  | -0.21108700 | -2.41531400 | C | -2.81815700 | 0.30045300  | 5.59522300  |
| H | 5.32177000  | 1.21682500  | -1.60087000 | H | -3.10697900 | -0.74110000 | 5.40683000  |
| C | 6.90419200  | 0.15849400  | -0.52876800 | H | -3.52693500 | 0.92698900  | 5.03325700  |
| H | 7.40140400  | -0.81585000 | -0.59266600 | C | -2.91939700 | 0.61893700  | 7.09045700  |
| H | 7.61134200  | 0.91026200  | -0.90522300 | H | -2.24346300 | -0.01721000 | 7.67923300  |
| C | 6.57192300  | 0.38707000  | 0.94319800  | H | -3.93943200 | 0.45393300  | 7.46102000  |
| O | 6.43243300  | -0.56362700 | 1.72177300  | H | -2.65444100 | 1.66534900  | 7.29739900  |

|             |             |             |             |   |             |             |             |
|-------------|-------------|-------------|-------------|---|-------------|-------------|-------------|
| O           | 0.55761800  | 2.47773100  | -2.40107100 |   |             |             |             |
| <b>Pro:</b> |             |             |             |   |             |             |             |
| Ca          | -2.27934100 | 0.03140700  | -1.72862200 | H | 2.80435300  | -3.52295700 | -6.62118000 |
| Mn          | 0.35165300  | -1.64017200 | -0.51652700 | H | 1.08966400  | -3.73883200 | -7.01856800 |
| Mn          | -1.71768200 | -1.64458100 | 1.22948000  | N | 2.39968100  | -1.37195300 | -0.50768800 |
| Mn          | -0.35938800 | 0.71552200  | 0.91797700  | C | 3.09551200  | -0.36442200 | -1.14373700 |
| Mn          | -0.11874800 | 3.39354800  | -0.72999300 | H | 2.57116300  | 0.39622200  | -1.70911400 |
| O           | -1.40591500 | -2.04422800 | -0.50187200 | C | 4.43933000  | -0.52273800 | -0.89807800 |
| O           | 0.11167600  | -1.12159800 | 1.25923100  | N | 4.53586900  | -1.66417000 | -0.10714600 |
| O           | -2.04759900 | 0.07035700  | 0.77814700  | H | 5.35395500  | -1.88552800 | 0.46333500  |
| O           | 0.06125500  | 0.13283700  | -0.81423200 | C | 3.28625800  | -2.12907000 | 0.11963300  |
| O           | -0.87810700 | 2.35579300  | 0.44405000  | H | 3.04635700  | -2.99187300 | 0.72353300  |
| O           | -3.97278500 | -0.69931400 | -3.45486100 | C | 5.62887800  | 0.27313500  | -1.36625300 |
| H           | -4.50110200 | -1.20801200 | -2.80738100 | H | 5.92411400  | -0.04135500 | -2.37889300 |
| H           | -3.34607300 | -1.33882400 | -3.85131400 | H | 5.31284800  | 1.32083000  | -1.46089600 |
| O           | -1.27315700 | 1.35285900  | -3.63018300 | C | 6.89490900  | 0.18678700  | -0.46770100 |
| H           | -1.92796300 | 2.06296400  | -3.74337300 | H | 7.39628900  | -0.77743900 | -0.60742600 |
| H           | -0.45599500 | 1.82967800  | -3.31727300 | H | 7.60009500  | 0.96882200  | -0.78102200 |
| O           | 0.90552700  | 4.01544900  | -2.41170100 | C | 6.55751100  | 0.29600600  | 1.01679000  |
| H           | 1.82215500  | 4.16068500  | -2.09435900 | O | 6.42368100  | -0.71398500 | 1.71739000  |
| O           | -0.29343800 | 5.57059600  | 0.14779500  | N | 6.33421800  | 1.55269400  | 1.49147000  |
| H           | -1.20478100 | 5.58860000  | -0.21861100 | H | 6.41421700  | 2.32161300  | 0.83707600  |
| H           | -0.39464900 | 5.42487000  | 1.10522400  | C | 5.58646200  | 1.78738400  | 2.73136600  |
| O           | -3.14847700 | 2.28990300  | -1.66795400 | H | 5.92247400  | 1.03849500  | 3.45468100  |
| C           | -3.02549400 | 3.51593900  | -1.48093300 | H | 5.86966500  | 2.77766200  | 3.11121000  |
| O           | -1.89617800 | 4.13913900  | -1.36585300 | C | 4.06387200  | 1.67565800  | 2.52500900  |
| C           | -4.29293600 | 4.36992100  | -1.42527100 | H | 3.82896300  | 0.66863100  | 2.16207200  |
| H           | -4.76796900 | 4.28634100  | -2.41427400 | H | 3.56456300  | 1.77727200  | 3.49853800  |
| H           | -4.97760800 | 3.86338800  | -0.73124300 | C | 3.51649200  | 2.71656300  | 1.54467700  |
| C           | -4.10442200 | 5.83758500  | -1.04179300 | H | 4.15417600  | 2.77937600  | 0.64940100  |
| H           | -3.43234500 | 6.35004400  | -1.74050600 | H | 3.52175700  | 3.72567100  | 1.98139000  |
| H           | -3.68385200 | 5.93490300  | -0.03152800 | C | 2.10656100  | 2.46139900  | 1.00699800  |
| H           | -5.06724700 | 6.36443800  | -1.04829800 | O | 1.53530500  | 1.38249400  | 1.32111500  |
| O           | 0.56371700  | -2.24041900 | -2.33308900 | O | 1.65538200  | 3.38575000  | 0.25051800  |
| C           | -0.32552500 | -2.31554800 | -3.27819400 | O | 0.69008700  | -3.51379000 | 0.24954600  |
| O           | -1.41687700 | -1.71682700 | -3.28405800 | C | -0.06851900 | -4.03911000 | 1.13400500  |
| C           | 0.07197400  | -3.21582200 | -4.44145200 | O | -1.06744400 | -3.49719800 | 1.70105100  |
| H           | 0.09698400  | -4.25065700 | -4.06526500 | C | 0.26162300  | -5.47730000 | 1.52153500  |
| H           | -0.71605000 | -3.15427100 | -5.20172600 | H | 1.35483200  | -5.55505500 | 1.59563600  |
| C           | 1.44308800  | -2.86536000 | -5.04508100 | H | -0.02110900 | -6.09915900 | 0.65772400  |
| H           | 2.20011000  | -2.91788900 | -4.25191700 | H | -5.62724600 | -3.71191300 | 0.45502700  |
| H           | 1.42568500  | -1.82257300 | -5.39567200 | C | -0.42526400 | -5.97547900 | 2.79352200  |
| C           | 1.82513200  | -3.79235800 | -6.20377800 | H | -0.14904200 | -7.01915400 | 2.99106500  |
| H           | 1.87907100  | -4.83959600 | -5.87392400 | H | -0.13425400 | -5.37305100 | 3.66275200  |

|   |             |             |             |   |             |             |             |
|---|-------------|-------------|-------------|---|-------------|-------------|-------------|
| H | -1.51494800 | -5.91467600 | 2.70133800  | H | -0.73821900 | -0.37585500 | 5.58591300  |
| O | -4.20732400 | -1.27663300 | -0.76985900 | H | -1.13530000 | 1.31777300  | 5.25244200  |
| C | -4.40326400 | -1.95779100 | 0.25576900  | C | -2.86922200 | 0.02543000  | 5.59132700  |
| O | -3.53487300 | -2.18701000 | 1.19391700  | H | -3.15118700 | -1.00795000 | 5.35391800  |
| C | -5.74750300 | -2.62157600 | 0.49936000  | H | -3.57718600 | 0.67321700  | 5.05298200  |
| H | -6.47501900 | -2.30097300 | -0.25133900 | C | -2.98285400 | 0.27545000  | 7.09865200  |
| H | -6.10889000 | -2.37543200 | 1.50461400  | H | -2.30790300 | -0.38342600 | 7.66310400  |
| O | -1.78585200 | -1.09317300 | 3.15022400  | H | -4.00465600 | 0.08908300  | 7.45398200  |
| C | -1.29878700 | 0.00502900  | 3.57451200  | H | -2.72459500 | 1.31270300  | 7.35455900  |
| O | -0.68707900 | 0.88552000  | 2.88499900  | O | 0.80404200  | 2.53811600  | -2.34532300 |
| C | -1.44885700 | 0.28428500  | 5.06314100  |   |             |             |             |

### W3 (water)-O5 (oxo)

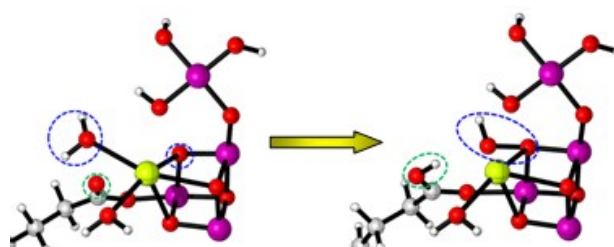

**Fig. S12** Pictorial exhibitions for the closed-cubane W3 (hydroxyl)-O5 (oxo) nucleophilic attack with COO<sup>-</sup> of Glu189 as the proton acceptor.

**Table S27** Reaction parameters for the closed-cubane W3 (hydroxyl)-O5 (oxo) nucleophilic attack with COO<sup>-</sup> of Glu189 as the proton acceptor.

| Spin state | Spin topology<br>(Mn1~Mn4-OX)   | Gibbs Free energy (a.u.) |            |            |
|------------|---------------------------------|--------------------------|------------|------------|
|            |                                 | Rea                      | TS         | Pro        |
| doublet    | $\alpha\alpha\beta\beta\alpha$  | -3366.1992               | -3366.1590 | -3366.1867 |
|            | $\alpha\beta\alpha\beta\alpha$  | -3366.1894               | -3366.1593 | -3366.2186 |
|            | $\alpha\beta\beta\alpha\alpha$  | -3366.1952               | -3366.1602 | -3366.1893 |
|            | $\beta\alpha\alpha\beta\alpha$  | -3366.1924               | -3366.1655 | -3366.2185 |
|            | $\beta\alpha\beta\alpha\alpha$  | -3366.1870               | -3366.1515 | -3366.1578 |
|            | $\beta\beta\alpha\alpha\alpha$  | -3366.1899               | -3366.1611 | -3366.2124 |
| sextet     | $\alpha\alpha\alpha\beta\beta$  | -3366.1892               | -3366.1549 | -3366.1609 |
|            | $\alpha\alpha\beta\alpha\beta$  | -3366.1871               | -3366.1577 | -3366.2226 |
|            | $\alpha\beta\alpha\alpha\beta$  | -3366.1858               | -3366.1538 | -3366.1577 |
|            | $\beta\alpha\alpha\alpha\beta$  | -3366.1934               | -3366.1585 | -3366.1873 |
| octet      | $\alpha\alpha\alpha\beta\alpha$ | -3366.1909               | -3366.1612 | -3366.2211 |
|            | $\alpha\alpha\beta\alpha\alpha$ | -3366.1980               | -3366.1612 | -3366.1887 |
|            | $\alpha\beta\alpha\alpha\alpha$ | -3366.1832               | -3366.1596 | -3366.2172 |
|            | $\beta\alpha\alpha\alpha\alpha$ | -3366.1973               | -3366.1624 | -3366.2147 |
| 12-et      | $\alpha\alpha\alpha\alpha\beta$ | -3366.1871               | -3366.1558 | -3366.1665 |

| 14-et      | $\alpha\alpha\alpha\alpha$      | -3366.1909                            | -3366.1605                 | -3366.2187             |                        |
|------------|---------------------------------|---------------------------------------|----------------------------|------------------------|------------------------|
| Spin state | Spin topology<br>(Mn1~Mn4-OX)   | Relative Gibbs Free energy (kcal/mol) |                            |                        |                        |
|            |                                 | $\Delta G^\ddagger(\text{Rea-TS})$    | $\Delta G(\text{Rea-Pro})$ | $\Delta G(\text{Rea})$ | $\Delta G(\text{Pro})$ |
| doublet    | $\alpha\alpha\beta\alpha$       | 25.2                                  | 7.8                        | 0.0                    | 22.5                   |
|            | $\alpha\beta\alpha\beta$        | 18.9                                  | -18.3                      | 6.1                    | 2.5                    |
|            | $\alpha\beta\beta\alpha$        | 22.0                                  | 3.7                        | 2.5                    | 20.9                   |
|            | $\beta\alpha\alpha\beta$        | 17.9                                  | -16.4                      | 4.3                    | 2.6                    |
|            | $\beta\alpha\beta\alpha$        | 22.3                                  | 18.3                       | 7.7                    | 40.7                   |
|            | $\beta\beta\alpha\alpha$        | 18.1                                  | -14.1                      | 5.8                    | 6.4                    |
| sextet     | $\alpha\alpha\alpha\beta$       | 21.5                                  | 17.8                       | 6.3                    | 38.7                   |
|            | $\alpha\alpha\beta\beta$        | 18.4                                  | -22.3                      | 7.6                    | 0.0                    |
|            | $\alpha\beta\alpha\alpha$       | 20.1                                  | 17.6                       | 8.4                    | 40.7                   |
|            | $\beta\alpha\alpha\beta$        | 21.9                                  | 3.8                        | 3.6                    | 22.2                   |
| octet      | $\alpha\alpha\alpha\beta$       | 18.6                                  | -19.0                      | 5.2                    | 0.9                    |
|            | $\alpha\alpha\beta\alpha$       | 23.1                                  | 5.8                        | 0.8                    | 21.3                   |
|            | $\alpha\beta\alpha\alpha$       | 14.8                                  | -21.3                      | 10.0                   | 3.4                    |
|            | $\beta\alpha\alpha\alpha$       | 21.9                                  | -10.9                      | 1.2                    | 5.0                    |
| 12-et      | $\alpha\alpha\alpha\alpha\beta$ | 19.6                                  | 12.9                       | 7.6                    | 35.2                   |
| 14-et      | $\alpha\alpha\alpha\alpha$      | 19.1                                  | -17.4                      | 5.2                    | 2.4                    |
| Spin state | Spin topology<br>(Mn1~Mn4-OX)   | Mulliken spin density                 |                            |                        |                        |
|            |                                 | Rea                                   | TS                         | Pro                    |                        |
| doublet    | $\alpha$                        | Mn1                                   | 2.89                       | 3.41                   | 3.86                   |
|            | $\alpha$                        | Mn2                                   | 2.93                       | 2.92                   | 2.94                   |
|            | $\beta$                         | Mn3                                   | -2.81                      | -2.74                  | -2.88                  |
|            | $\beta$                         | Mn4                                   | -2.53                      | -2.91                  | -2.91                  |
|            |                                 | O4                                    | 0.43                       | -0.15                  | -0.14                  |
|            | $\alpha$                        | O8                                    | 0.00                       | 0.35                   | 0.00                   |
|            |                                 | O5                                    | -0.01                      | 0.13                   | 0.08                   |
|            |                                 | Mn1                                   | 2.81                       | 3.01                   | 2.97                   |
|            | $\beta$                         | Mn2                                   | -2.88                      | -2.90                  | -2.92                  |
|            | $\alpha$                        | Mn3                                   | 2.70                       | 3.27                   | 3.83                   |
|            | $\beta$                         | Mn4                                   | -2.88                      | -2.86                  | -2.82                  |
|            |                                 | O4                                    | 0.20                       | 0.07                   | -0.05                  |
|            | $\alpha$                        | O8                                    | 0.00                       | 0.45                   | 0.00                   |
|            |                                 | O5                                    | 0.52                       | 0.00                   | -0.04                  |
|            |                                 | Mn1                                   | 2.80                       | 3.39                   | 3.87                   |
|            | $\beta$                         | Mn2                                   | -2.92                      | -2.89                  | -2.86                  |
| $\beta$    | Mn3                             | -2.79                                 | -2.75                      | -2.86                  |                        |
| $\alpha$   | Mn4                             | 2.88                                  | 2.87                       | 2.87                   |                        |
|            | O4                              | -0.18                                 | -0.10                      | -0.07                  |                        |
| $\alpha$   | O8                              | 0.00                                  | 0.37                       | 0.00                   |                        |

|        |          |     |       |       |       |
|--------|----------|-----|-------|-------|-------|
|        |          | O5  | 0.56  | 0.14  | 0.07  |
|        | $\beta$  | Mn1 | -2.78 | -2.80 | -2.93 |
|        | $\alpha$ | Mn2 | 2.81  | 2.91  | 2.94  |
|        | $\alpha$ | Mn3 | 2.75  | 3.39  | 3.83  |
|        | $\beta$  | Mn4 | -2.88 | -2.86 | -2.83 |
|        |          | O4  | 0.15  | 0.04  | -0.04 |
|        | $\alpha$ | O8  | 0.00  | 0.34  | 0.00  |
|        |          | O5  | 0.01  | 0.09  | 0.04  |
|        |          | O1  | 0.54  | -0.08 | -0.07 |
|        | $\beta$  | Mn1 | -2.85 | -2.32 | -1.96 |
|        | $\alpha$ | Mn2 | 2.92  | 2.89  | 2.89  |
|        | $\beta$  | Mn3 | -2.73 | -2.77 | -2.82 |
|        | $\alpha$ | Mn4 | 2.88  | 2.87  | 2.87  |
|        |          | O4  | -0.17 | -0.11 | -0.08 |
|        | $\alpha$ | O8  | 0.19  | 0.24  | 0.00  |
|        |          | O5  | 0.78  | 0.10  | 0.06  |
|        | $\beta$  | Mn1 | -2.87 | -2.83 | -2.95 |
|        | $\beta$  | Mn2 | -2.92 | -2.90 | -2.93 |
|        | $\alpha$ | Mn3 | 2.69  | 3.37  | 3.86  |
|        | $\alpha$ | Mn4 | 2.91  | 2.92  | 2.89  |
|        |          | O4  | 0.21  | 0.12  | 0.00  |
|        |          | O8  | 0.00  | 0.37  | 0.00  |
|        | $\alpha$ | O5  | 0.57  | 0.09  | 0.04  |
|        |          | O2  | 0.46  | -0.06 | -0.05 |
|        |          | O1  | -0.11 | -0.12 | -0.07 |
|        | $\alpha$ | Mn1 | 2.87  | 2.33  | 1.98  |
|        | $\alpha$ | Mn2 | 2.91  | 2.87  | 2.91  |
|        | $\alpha$ | Mn3 | 2.78  | 2.81  | 2.86  |
|        | $\beta$  | Mn4 | -2.88 | -2.87 | -2.87 |
|        |          | O4  | 0.15  | 0.09  | 0.07  |
|        |          | O8  | -0.21 | -0.24 | 0.00  |
|        | $\beta$  | O5  | -0.75 | -0.09 | -0.05 |
|        |          | O1  | 0.14  | 0.14  | 0.14  |
|        | $\alpha$ | Mn1 | 2.78  | 2.47  | 2.95  |
| sextet | $\alpha$ | Mn2 | 2.91  | 2.93  | 2.93  |
|        | $\beta$  | Mn3 | -2.76 | -3.13 | -3.81 |
|        | $\alpha$ | Mn4 | 2.88  | 2.87  | 2.82  |
|        |          | O4  | -0.11 | 0.01  | 0.04  |
|        | $\beta$  | O8  | 0.00  | -0.26 | 0.00  |
|        |          | O5  | -0.61 | -0.05 | -0.04 |
|        | $\alpha$ | Mn1 | 2.76  | 2.26  | 2.02  |
|        | $\beta$  | Mn2 | -2.89 | -2.91 | -3.01 |
|        | $\alpha$ | Mn3 | 2.89  | 2.98  | 2.94  |
|        | $\alpha$ | Mn4 | 2.91  | 2.93  | 2.93  |

|  |          |     |       |       |       |
|--|----------|-----|-------|-------|-------|
|  |          | O4  | 0.04  | -0.04 | -0.02 |
|  | $\beta$  | O8  | 0.00  | -0.24 | 0.01  |
|  |          | O5  | -0.58 | -0.02 | 0.04  |
|  | $\beta$  | Mn1 | -2.79 | -3.38 | -3.87 |
|  | $\alpha$ | Mn2 | 2.91  | 2.89  | 2.87  |
|  | $\alpha$ | Mn3 | 2.84  | 2.79  | 2.90  |
|  | $\alpha$ | Mn4 | 2.92  | 2.92  | 2.92  |
|  |          | O4  | 0.17  | 0.15  | 0.13  |
|  | $\beta$  | O8  | 0.00  | -0.36 | 0.00  |
|  |          | O5  | -0.57 | -0.14 | -0.07 |
|  | $\alpha$ | Mn1 | 2.85  | 3.02  | 2.98  |
|  | $\alpha$ | Mn2 | 2.80  | 2.91  | 2.95  |
|  | $\alpha$ | Mn3 | 2.80  | 3.34  | 3.86  |
|  | $\beta$  | Mn4 | -2.87 | -2.86 | -2.82 |
|  |          | O4  | 0.18  | 0.06  | -0.05 |
|  |          | O8  | 0.00  | 0.44  | 0.00  |
|  | $\alpha$ | O5  | 0.09  | 0.00  | -0.03 |
|  |          | O1  | 0.63  | 0.12  | 0.07  |
|  |          | O2  | 0.40  | 0.07  | 0.05  |
|  | $\alpha$ | Mn1 | 2.80  | 3.42  | 3.86  |
|  | $\alpha$ | Mn2 | 2.84  | 2.92  | 2.94  |
|  | $\beta$  | Mn3 | -2.66 | -2.70 | -2.82 |
|  | $\alpha$ | Mn4 | 2.87  | 2.87  | 2.87  |
|  |          | O4  | -0.20 | -0.11 | -0.07 |
|  |          | O8  | 0.00  | 0.35  | 0.00  |
|  | $\alpha$ | O5  | 0.22  | 0.13  | 0.08  |
|  |          | O1  | 0.56  | 0.08  | 0.05  |
|  |          | O2  | 0.35  | 0.00  | -0.03 |
|  | $\alpha$ | Mn1 | 2.81  | 3.00  | 2.97  |
|  | $\beta$  | Mn2 | -2.88 | -2.90 | -2.92 |
|  | $\alpha$ | Mn3 | 2.75  | 3.33  | 3.88  |
|  | $\alpha$ | Mn4 | 2.91  | 2.92  | 2.89  |
|  |          | O4  | 0.22  | 0.12  | 0.12  |
|  |          | O8  | 0.00  | 0.45  | 0.00  |
|  | $\alpha$ | O5  | 0.52  | 0.01  | -0.04 |
|  |          | O1  | 0.52  | 0.09  | 0.07  |
|  | $\beta$  | Mn1 | -2.80 | -2.81 | -2.94 |
|  | $\alpha$ | Mn2 | 2.81  | 2.91  | 2.94  |
|  | $\alpha$ | Mn3 | 2.79  | 3.43  | 3.89  |
|  | $\alpha$ | Mn4 | 2.91  | 2.92  | 2.90  |
|  |          | O4  | 0.17  | 0.10  | 0.11  |
|  |          | O8  | 0.00  | 0.36  | 0.00  |
|  | $\alpha$ | O5  | 0.01  | 0.09  | 0.04  |
|  |          | O1  | 0.54  | -0.08 | -0.07 |



|       |          |     |       |       |       |
|-------|----------|-----|-------|-------|-------|
|       |          | O2  | 0.42  | 0.05  | 0.04  |
| 12-et | $\alpha$ | Mn1 | 2.78  | 2.26  | 2.01  |
|       | $\alpha$ | Mn2 | 2.91  | 2.93  | 2.91  |
|       | $\alpha$ | Mn3 | 2.94  | 3.00  | 2.90  |
|       | $\alpha$ | Mn4 | 2.91  | 2.93  | 2.92  |
|       |          | O4  | 0.05  | -0.04 | 0.17  |
|       | $\beta$  | O8  | 0.00  | -0.23 | 0.00  |
|       |          | O5  | -0.57 | -0.01 | -0.04 |
| 14-et | $\alpha$ | Mn1 | 2.86  | 3.01  | 2.98  |
|       | $\alpha$ | Mn2 | 2.80  | 2.91  | 2.95  |
|       | $\alpha$ | Mn3 | 2.85  | 3.40  | 3.91  |
|       | $\alpha$ | Mn4 | 2.91  | 2.92  | 2.89  |
|       |          | O4  | 0.17  | 0.11  | 0.11  |
|       |          | O8  | 0.00  | 0.44  | 0.00  |
|       | $\alpha$ | O5  | 0.09  | 0.00  | -0.03 |
|       |          | O1  | 0.63  | 0.12  | 0.07  |
|       |          | O2  | 0.41  | 0.07  | 0.05  |

'X' denotes atypism for the ascription of spin center.

**Rea:**

|    |             |             |             |   |             |             |             |
|----|-------------|-------------|-------------|---|-------------|-------------|-------------|
| Ca | -2.66268800 | -0.65825900 | -1.61564400 | H | -6.33270400 | 3.32458300  | -1.74641100 |
| Mn | 1.38161500  | -1.46403800 | -0.27283200 | C | -7.29490400 | 1.53549000  | -0.94725900 |
| Mn | -0.75398300 | -2.11320200 | 1.34283100  | H | -7.12879900 | 0.78413700  | -0.16618000 |
| Mn | -0.59923400 | 0.52044900  | 0.54964600  | H | -7.37257700 | 1.01059500  | -1.90788700 |
| Mn | -1.93116600 | 2.75066700  | -1.56877100 | H | -8.25777100 | 2.02510100  | -0.75325200 |
| O  | -0.09419000 | -2.49514900 | -0.37770700 | O | 2.27231400  | -1.98961200 | -1.84716400 |
| O  | 0.66393500  | -0.87247500 | 1.33172500  | C | 1.97894300  | -2.85202700 | -2.80119400 |
| O  | -1.78733300 | -0.88966500 | 0.64020500  | O | 0.86733000  | -3.01444100 | -3.30282500 |
| O  | 0.19258300  | -0.24570900 | -0.98416800 | C | 3.17730500  | -3.67208200 | -3.27057900 |
| O  | -1.84872800 | 1.39501900  | -0.23649300 | H | 3.42634100  | -4.37436900 | -2.45901200 |
| O  | -4.78515100 | -1.67484400 | -2.49465800 | H | 2.85544600  | -4.26379600 | -4.13572600 |
| H  | -4.78351700 | -2.42662500 | -1.86815700 | C | 4.42305700  | -2.83666200 | -3.60901300 |
| H  | -5.35137500 | -0.98514300 | -2.09331900 | H | 4.71704400  | -2.26390800 | -2.71963200 |
| O  | -1.28212700 | -1.36098000 | -3.44611300 | H | 4.16718400  | -2.10359500 | -4.38961200 |
| H  | -0.90484400 | -0.47474700 | -3.60902400 | C | 5.59425000  | -3.70289800 | -4.08522200 |
| H  | -0.50729300 | -1.97261500 | -3.34022800 | H | 5.89205000  | -4.42603000 | -3.31287900 |
| O  | -1.97609700 | 3.83839000  | -3.02147100 | H | 6.47243300  | -3.08857900 | -4.32430200 |
| H  | -1.98070800 | 4.73314900  | -2.63152200 | H | 5.32951500  | -4.27143400 | -4.98730400 |
| O  | -1.83527100 | 4.19089500  | -0.42897300 | N | 2.97783100  | -0.23408500 | 0.08397900  |
| H  | -2.70844500 | 4.23090800  | 0.00220900  | C | 3.89381500  | 0.30245100  | -0.79550800 |
| O  | -4.61494600 | 0.73652700  | -1.24209700 | H | 3.84852000  | 0.07103100  | -1.85033600 |
| C  | -4.77317400 | 1.97590400  | -1.19640800 | C | 4.77506100  | 1.09749000  | -0.09908600 |
| O  | -3.86124200 | 2.87910700  | -1.31745700 | N | 4.37786900  | 1.00012900  | 1.22988300  |
| C  | -6.16698100 | 2.56604100  | -0.96931800 | H | 4.71650500  | 1.61229100  | 1.97947400  |
| H  | -6.12648200 | 3.12141800  | -0.02046400 | C | 3.28541200  | 0.21292700  | 1.29528800  |

|   |            |             |             |   |             |             |             |
|---|------------|-------------|-------------|---|-------------|-------------|-------------|
| H | 2.71811200 | 0.00741300  | 2.19126600  | H | 2.85878400  | -5.39473900 | 1.54053200  |
| C | 5.92450400 | 1.94530900  | -0.58257300 | H | -4.85823100 | -4.79929000 | 0.16722400  |
| H | 6.77270100 | 1.30643200  | -0.87006700 | C | 2.01322000  | -5.33319400 | 3.54942900  |
| H | 5.60462700 | 2.44601500  | -1.50704900 | H | 2.70526200  | -6.08355100 | 3.95185300  |
| C | 6.45962900 | 3.00187000  | 0.42085200  | H | 1.79910100  | -4.60386200 | 4.33966900  |
| H | 7.05492300 | 2.51745800  | 1.20254300  | H | 1.07083800  | -5.83090900 | 3.29575900  |
| H | 7.12809100 | 3.68414800  | -0.12179300 | O | -3.33001700 | -2.87832800 | -0.51083500 |
| C | 5.35596500 | 3.77363600  | 1.14649700  | C | -3.09292000 | -3.59094100 | 0.48232100  |
| O | 5.03721700 | 3.48189000  | 2.30854200  | O | -2.09981300 | -3.44547500 | 1.31240600  |
| N | 4.70318400 | 4.72507500  | 0.43649100  | C | -3.98287400 | -4.77379500 | 0.82192600  |
| H | 4.98397700 | 4.89077400  | -0.52235300 | H | -4.29487100 | -4.71928000 | 1.87142900  |
| C | 3.45900600 | 5.34363000  | 0.91551800  | H | -3.40955300 | -5.70183400 | 0.70029000  |
| H | 3.63601000 | 5.71199300  | 1.93218400  | O | -1.19947700 | -1.37046500 | 3.10088300  |
| H | 3.26824000 | 6.21051400  | 0.27126900  | C | -1.27881200 | -0.10642100 | 3.31105200  |
| C | 2.25399300 | 4.38584200  | 0.91659900  | O | -1.07465300 | 0.82737100  | 2.47286400  |
| H | 2.41900200 | 3.59774800  | 1.65841500  | C | -1.66025100 | 0.31674400  | 4.72008700  |
| H | 1.37209100 | 4.95344400  | 1.24468000  | H | -1.82764700 | -0.58488400 | 5.32028600  |
| C | 1.98398700 | 3.75986100  | -0.45774800 | H | -0.79679800 | 0.85066700  | 5.14595100  |
| H | 2.85902900 | 3.17425900  | -0.77781300 | C | -2.89265000 | 1.23971800  | 4.74449300  |
| H | 1.80288300 | 4.52698500  | -1.21969000 | H | -3.74654900 | 0.71126300  | 4.29516500  |
| C | 0.79281500 | 2.80750300  | -0.49077200 | H | -2.69294600 | 2.11102500  | 4.10802600  |
| O | 0.66527800 | 2.01449600  | 0.50932900  | C | -3.25034200 | 1.68788400  | 6.16505500  |
| O | 0.07505500 | 2.85285100  | -1.52596700 | H | -3.47450100 | 0.82898900  | 6.81278700  |
| O | 2.30090400 | -2.92532500 | 0.73241600  | H | -4.13207900 | 2.34145100  | 6.16028100  |
| C | 1.74624200 | -3.60071700 | 1.66776200  | H | -2.42335000 | 2.24595600  | 6.62608300  |
| O | 0.55316300 | -3.47846600 | 2.07494700  | O | -2.01939900 | 1.31931100  | -2.82812200 |
| C | 2.62702500 | -4.65703900 | 2.32364300  | H | -2.20362800 | 1.77509100  | -3.66785800 |
| H | 3.58409300 | -4.17369900 | 2.56384100  |   |             |             |             |

**TS:**

|    |             |             |             |   |             |             |             |
|----|-------------|-------------|-------------|---|-------------|-------------|-------------|
| Ca | 2.72772100  | 0.36343500  | -1.62585700 | H | -0.56921600 | 0.83090800  | -3.29839900 |
| Mn | -1.52829800 | 1.47506800  | -0.34380400 | O | 2.20867000  | -4.38494900 | -2.22788900 |
| Mn | 0.64008400  | 2.27318900  | 1.01723600  | H | 2.44175200  | -5.14008400 | -1.65446400 |
| Mn | 0.58147700  | -0.47555300 | 0.56903500  | O | 2.04482900  | -4.06780500 | 0.35381100  |
| Mn | 2.08226900  | -2.97337200 | -1.09983300 | H | 2.27789200  | -3.50224700 | 1.11364700  |
| O  | -0.15759800 | 2.59430700  | -0.55964500 | O | 4.76765700  | -0.79676300 | -1.30616000 |
| O  | -0.69487600 | 0.92238500  | 1.20448800  | C | 4.94701000  | -2.01893200 | -1.06761100 |
| O  | 1.66298600  | 0.96292900  | 0.38535300  | O | 4.04825400  | -2.92134900 | -0.92929000 |
| O  | -0.44309200 | -0.05769200 | -1.03894100 | C | 6.37110800  | -2.55478200 | -0.89670000 |
| O  | 1.89417100  | -1.39800800 | -0.12228400 | H | 6.44182100  | -2.94623200 | 0.12871100  |
| O  | 4.50420700  | 1.42384100  | -3.00211000 | H | 6.47060500  | -3.43170800 | -1.55087000 |
| H  | 4.51797700  | 2.24593900  | -2.46677000 | C | 7.47326400  | -1.53111000 | -1.16597300 |
| H  | 5.21888500  | 0.85753200  | -2.64675900 | H | 7.37531600  | -0.66108800 | -0.50593100 |
| O  | 0.46763500  | 0.12444700  | -2.55615700 | H | 7.43693100  | -1.17067700 | -2.20199900 |
| H  | 0.67521300  | -0.84547000 | -2.73003500 | H | 8.46174500  | -1.97853900 | -0.99999000 |

|   |             |             |             |   |             |             |             |
|---|-------------|-------------|-------------|---|-------------|-------------|-------------|
| O | -2.43930400 | 1.95693600  | -2.10663900 | H | -2.79654900 | -3.21938200 | -0.45405500 |
| C | -2.16559400 | 2.03591000  | -3.32561300 | H | -1.80461600 | -4.62686000 | -0.89265700 |
| O | -1.20328100 | 1.40402400  | -3.92117500 | C | -0.70514000 | -2.94379600 | -0.18704400 |
| C | -2.98488500 | 2.92984800  | -4.23209100 | O | -0.59043700 | -2.07944300 | 0.74579400  |
| H | -2.37289500 | 3.83121300  | -4.40236000 | O | 0.07800600  | -3.13146300 | -1.16334100 |
| H | -3.06584000 | 2.43790300  | -5.21072900 | O | -2.47179100 | 3.00082100  | 0.74234600  |
| C | -4.35749400 | 3.32183800  | -3.67522100 | C | -1.82148100 | 3.73043300  | 1.55461000  |
| H | -4.22523100 | 3.78932000  | -2.69132600 | O | -0.59400600 | 3.59675000  | 1.87652200  |
| H | -4.95268400 | 2.41265600  | -3.50391400 | C | -2.58478700 | 4.88729700  | 2.19257800  |
| C | -5.11322100 | 4.26676700  | -4.61545700 | H | -3.59081300 | 4.51972000  | 2.43452600  |
| H | -4.55512600 | 5.19983800  | -4.77521800 | H | -2.72506900 | 5.63522700  | 1.39618400  |
| H | -6.09374800 | 4.53263900  | -4.20086800 | H | 4.74423300  | 4.76684800  | -0.59102000 |
| H | -5.27995000 | 3.80745700  | -5.59983400 | C | -1.90605600 | 5.51910700  | 3.40859300  |
| N | -3.14424900 | 0.24914300  | 0.08419800  | H | -2.50924900 | 6.35234000  | 3.79163100  |
| C | -4.05541500 | -0.39199100 | -0.72792400 | H | -1.78054100 | 4.78801300  | 4.21683800  |
| H | -4.05906900 | -0.23594000 | -1.79778600 | H | -0.91133800 | 5.89817900  | 3.15076100  |
| C | -4.87204700 | -1.18999600 | 0.03964400  | O | 3.22196700  | 2.76737500  | -0.99329500 |
| N | -4.44087900 | -0.99294700 | 1.34605700  | C | 2.97935600  | 3.61079700  | -0.10057200 |
| H | -4.72389900 | -1.57394100 | 2.14170500  | O | 2.02258400  | 3.56696500  | 0.77098000  |
| C | -3.39364500 | -0.14276800 | 1.32777000  | C | 3.84307000  | 4.85638300  | 0.02238800  |
| H | -2.81343200 | 0.14483500  | 2.19271800  | H | 4.11147100  | 5.02888800  | 1.07055200  |
| C | -5.98808800 | -2.12201600 | -0.35852300 | H | 3.26305200  | 5.72618400  | -0.31360800 |
| H | -6.86815600 | -1.54464100 | -0.67875800 | O | 1.26055100  | 1.65693500  | 2.85434300  |
| H | -5.65982000 | -2.67966700 | -1.24709500 | C | 1.36778900  | 0.43482200  | 3.17695500  |
| C | -6.45978200 | -3.11867700 | 0.73169100  | O | 1.12781500  | -0.58879800 | 2.44092900  |
| H | -7.04193100 | -2.59635400 | 1.49879900  | C | 1.83112200  | 0.13787300  | 4.59544000  |
| H | -7.12679700 | -3.85381700 | 0.26087300  | H | 1.05432900  | 0.51420900  | 5.27855600  |
| C | -5.31288300 | -3.81273800 | 1.46933900  | H | 1.89417200  | -0.94889800 | 4.72252700  |
| O | -4.96760500 | -3.43978000 | 2.59979400  | C | 3.17346000  | 0.81364300  | 4.92915900  |
| N | -4.66097500 | -4.79416000 | 0.80089300  | H | 3.07511900  | 1.89370500  | 4.76067100  |
| H | -4.96805400 | -5.02877500 | -0.13506300 | H | 3.94125900  | 0.45367300  | 4.22804200  |
| C | -3.40857000 | -5.38473000 | 1.29280700  | C | 3.61879200  | 0.53845200  | 6.36895700  |
| H | -3.57425200 | -5.71629600 | 2.32440900  | H | 2.88182200  | 0.91550600  | 7.09191100  |
| H | -3.21894000 | -6.27439200 | 0.67996900  | H | 4.57805100  | 1.02654500  | 6.58481600  |
| C | -2.20551900 | -4.42695600 | 1.25005300  | H | 3.74322200  | -0.53800100 | 6.55133200  |
| H | -2.36017200 | -3.61594100 | 1.96896200  | O | 2.10890000  | -1.82195400 | -2.68108100 |
| H | -1.32257900 | -4.98843700 | 1.58703100  | H | 2.31961900  | -2.43669800 | -3.40479700 |
| C | -1.94110400 | -3.83786300 | -0.14366100 |   |             |             |             |

**Pro:**

|    |             |             |             |   |             |             |             |
|----|-------------|-------------|-------------|---|-------------|-------------|-------------|
| Ca | -2.97442300 | -0.37513300 | -1.37953900 | O | 0.20051300  | -2.57243300 | -0.57909100 |
| Mn | 1.62393100  | -1.49740400 | -0.43689500 | O | 0.74567900  | -0.84383100 | 1.11976900  |
| Mn | -0.51416900 | -2.21258500 | 1.02298200  | O | -1.62502900 | -0.93768400 | 0.42009800  |
| Mn | -0.62191400 | 0.53381300  | 0.59757400  | O | 0.27808000  | 0.31163900  | -1.14092700 |
| Mn | -2.25890600 | 2.97310700  | -0.99844400 | O | -2.01816000 | 1.44158400  | 0.02088800  |

|   |             |             |             |   |             |             |             |
|---|-------------|-------------|-------------|---|-------------|-------------|-------------|
| O | -3.90449200 | -1.80102700 | -3.16325500 | C | 6.41032500  | 3.30401400  | 0.34319800  |
| H | -3.91378400 | -2.57815700 | -2.55378300 | H | 7.03660900  | 2.80166600  | 1.08861300  |
| H | -4.80436400 | -1.70284800 | -3.51436600 | H | 7.03904800  | 4.05078000  | -0.16096900 |
| O | -0.58953300 | -0.03021300 | -2.25378900 | C | 5.28071700  | 3.97958600  | 1.12381600  |
| H | -1.00974800 | 0.88186300  | -2.53883400 | O | 4.99554600  | 3.61390800  | 2.27319400  |
| H | 0.26552800  | -1.00148100 | -3.18392300 | N | 4.57673200  | 4.93768100  | 0.47468000  |
| O | -2.45364900 | 4.31107400  | -2.20885400 | H | 4.83665400  | 5.17011700  | -0.47592800 |
| H | -2.71174300 | 5.09417600  | -1.68665500 | C | 3.34392600  | 5.51854300  | 1.02412400  |
| O | -2.21035000 | 4.12637300  | 0.39671100  | H | 3.56174900  | 5.87664100  | 2.03716900  |
| H | -2.38030600 | 3.57847400  | 1.18638800  | H | 3.10464000  | 6.39076400  | 0.40358400  |
| O | -4.97166900 | 0.77260300  | -1.05170500 | C | 2.15592100  | 4.54282400  | 1.07264500  |
| C | -5.12774100 | 1.99924700  | -0.83166900 | H | 2.36537000  | 3.74942100  | 1.79719200  |
| O | -4.21770400 | 2.90152200  | -0.77604500 | H | 1.28741500  | 5.10034800  | 1.45154400  |
| C | -6.53627600 | 2.55112200  | -0.59518300 | C | 1.81472000  | 3.92015400  | -0.28975500 |
| H | -6.51546500 | 3.08838700  | 0.36341300  | H | 2.65411500  | 3.29817500  | -0.63511300 |
| H | -6.71110400 | 3.32392300  | -1.35767200 | H | 1.62948900  | 4.69120500  | -1.04695000 |
| C | -7.64155100 | 1.49622500  | -0.61370000 | C | 0.58330400  | 3.02018900  | -0.23388100 |
| H | -7.47117400 | 0.73129900  | 0.15320100  | O | 0.54358300  | 2.15923900  | 0.70662300  |
| H | -7.68610000 | 0.98570000  | -1.58327300 | O | -0.27450500 | 3.20660700  | -1.14617600 |
| H | -8.61848500 | 1.96061600  | -0.42592900 | O | 2.59433800  | -3.01931200 | 0.75997300  |
| O | 2.34006900  | -1.94086800 | -2.31921800 | C | 1.92496700  | -3.70076800 | 1.58815100  |
| C | 1.82097400  | -2.16961100 | -3.42956500 | O | 0.69634500  | -3.51902800 | 1.89892200  |
| O | 0.71120800  | -1.62946200 | -3.85637400 | C | 2.63886500  | -4.86204300 | 2.27666100  |
| C | 2.45412400  | -3.12891200 | -4.40998100 | H | 3.64411300  | -4.50967100 | 2.54440000  |
| H | 1.82147400  | -4.03192200 | -4.40124400 | H | 2.79102100  | -5.62910100 | 1.50093800  |
| H | 2.34770700  | -2.70511200 | -5.41806200 | H | -4.67393100 | -4.85599200 | -0.19927300 |
| C | 3.90806600  | -3.49444200 | -4.09494300 | C | 1.91103200  | -5.45645400 | 3.48295200  |
| H | 3.96458300  | -3.89483300 | -3.07469200 | H | 2.48465700  | -6.29379400 | 3.90157800  |
| H | 4.52069400  | -2.58116200 | -4.09977800 | H | 1.77472900  | -4.70673800 | 4.27207700  |
| C | 4.47646400  | -4.50723500 | -5.09450300 | H | 0.91687300  | -5.82052300 | 3.20189600  |
| H | 3.90156900  | -5.44365000 | -5.08356800 | O | -3.23545300 | -2.80877300 | -0.83864300 |
| H | 5.51805200  | -4.75373900 | -4.85363100 | C | -2.87608600 | -3.67068200 | 0.00896400  |
| H | 4.45449400  | -4.11590800 | -6.12119400 | O | -1.91350600 | -3.56783900 | 0.84979700  |
| N | 3.21232400  | -0.20902300 | -0.11921200 | C | -3.61863900 | -4.99822800 | 0.05695400  |
| C | 4.06665600  | 0.45194900  | -0.97690100 | H | -3.52262200 | -5.46595400 | 1.04085700  |
| H | 4.04606300  | 0.26382200  | -2.04184600 | H | -3.17395700 | -5.67355900 | -0.68776100 |
| C | 4.86377700  | 1.31288700  | -0.25847000 | O | -1.13768700 | -1.63739900 | 2.88573900  |
| N | 4.48028400  | 1.13527600  | 1.06555800  | C | -1.25146000 | -0.42686200 | 3.23034100  |
| H | 4.76753900  | 1.74381000  | 1.83882100  | O | -1.04984000 | 0.60938900  | 2.49735200  |
| C | 3.47823700  | 0.23324300  | 1.10463600  | C | -1.70260200 | -0.12753300 | 4.65455100  |
| H | 2.93639800  | -0.05547600 | 1.99417700  | H | -1.26411000 | 0.83453300  | 4.95001400  |
| C | 5.91699400  | 2.28879200  | -0.71860800 | H | -2.79187000 | 0.03709200  | 4.60492200  |
| H | 6.79902200  | 1.74554100  | -1.08895800 | C | -1.38318000 | -1.22838000 | 5.67227100  |
| H | 5.51818700  | 2.83330500  | -1.58650000 | H | -0.29531000 | -1.38772900 | 5.70214500  |

|   |             |             |            |   |             |             |             |
|---|-------------|-------------|------------|---|-------------|-------------|-------------|
| H | -1.81931300 | -2.17377700 | 5.32637000 | H | -2.98847100 | -0.75587000 | 7.07917800  |
| C | -1.89704700 | -0.88693300 | 7.07515100 | O | -2.28835600 | 1.72724000  | -2.56254800 |
| H | -1.45110800 | 0.04461600  | 7.45139300 | H | -2.46050300 | 2.32647400  | -3.30943100 |
| H | -1.65511600 | -1.68448900 | 7.78961300 |   |             |             |             |

### W3 (hydroxyl) as the reagent

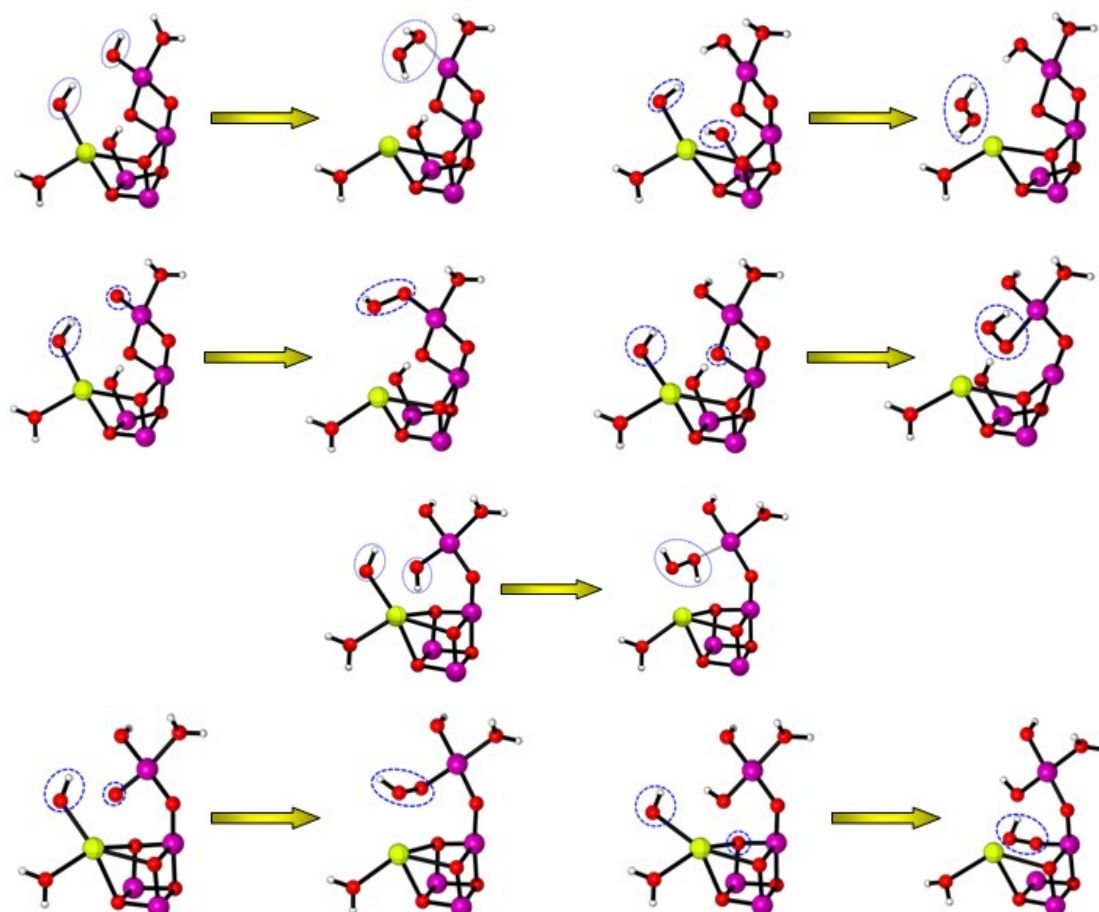

**Fig. S13** Pictorial exhibitions for couplings of W3 (hydroxyl)-W2 (hydroxyl)/Wx (hydroxyl), nucleophilic attack of W3 (hydroxyl) on W2 (oxo)/O5 (oxo) in the open-cubane structure, and coupling of W3 (hydroxyl)-Wx (hydroxyl), nucleophilic attack of W3 (hydroxyl) on Wx (oxo)/O5 (oxo) in the closed-cubane structure.

**Table S28** Reaction parameters for the open-cubane W3 (hydroxyl)-W2 (hydroxyl) coupling:

| Spin state | Spin topology<br>(Mn1~Mn4-O8) | Gibbs Free energy (a.u.) |            |            |
|------------|-------------------------------|--------------------------|------------|------------|
|            |                               | Rea                      | TS         | Pro        |
| doublet    | $\alpha\alpha\beta\alpha$     | -3366.2003               | -3366.1707 | -3366.1721 |
|            | $\alpha\beta\alpha\beta$      | -3366.2004               | -3366.1722 | -3366.1735 |
|            | $\alpha\beta\beta\alpha$      | -3366.2033               | -3366.1712 | -3366.2117 |
|            | $\beta\alpha\alpha\beta$      | -3366.2001               | -3366.1723 | -3366.1932 |

|        |                                  |            |            |            |
|--------|----------------------------------|------------|------------|------------|
|        | $\beta\alpha\beta\alpha$         | -3366.2032 | -3366.1716 | -3366.2115 |
|        | $\beta\beta\alpha\alpha$         | -3366.2024 | -3366.1676 | -3366.2063 |
| sextet | $\alpha\alpha\beta\beta$         | -3366.2045 | -3366.1724 | -3366.2127 |
|        | $\alpha\alpha\beta\alpha\beta$   | -3366.2023 | -3366.1733 | -3366.1949 |
|        | $\alpha\beta\alpha\alpha\beta$   | -3366.2022 | -3366.1715 | -3366.1737 |
|        | $\beta\alpha\alpha\alpha\beta$   | -3366.2017 | -3366.1716 | -3366.1737 |
| octet  | $\alpha\alpha\alpha\beta\alpha$  | -3366.2026 | -3366.1737 | -3366.1938 |
|        | $\alpha\alpha\beta\alpha\alpha$  | -3366.2045 | -3366.1723 | -3366.2130 |
|        | $\alpha\beta\alpha\alpha\alpha$  | -3366.2039 | -3366.1692 | -3366.2077 |
|        | $\beta\alpha\alpha\alpha\alpha$  | -3366.2039 | -3366.1690 | -3366.2084 |
| 12-et  | $\alpha\alpha\alpha\alpha\beta$  | -3366.2029 | -3366.1728 | -3366.1748 |
| 14-et  | $\alpha\alpha\alpha\alpha\alpha$ | -3366.2048 | -3366.1702 | -3366.2088 |

| Spin state | Spin topology<br>(Mn1~Mn4-O8)    | Relative Gibbs Free energy (kcal/mol) |                            |                        |                        |
|------------|----------------------------------|---------------------------------------|----------------------------|------------------------|------------------------|
|            |                                  | $\Delta G^\ddagger(\text{Rea-TS})$    | $\Delta G(\text{Rea-Pro})$ | $\Delta G(\text{Rea})$ | $\Delta G(\text{Pro})$ |
| doublet    | $\alpha\alpha\beta\beta\alpha$   | 18.6                                  | 17.7                       | 2.8                    | 25.7                   |
|            | $\alpha\beta\alpha\beta\alpha$   | 17.7                                  | 16.9                       | 2.8                    | 24.8                   |
|            | $\alpha\beta\beta\alpha\alpha$   | 20.1                                  | -5.3                       | 0.9                    | 0.8                    |
|            | $\beta\alpha\alpha\beta\alpha$   | 17.4                                  | 4.3                        | 2.9                    | 12.4                   |
|            | $\beta\alpha\beta\alpha\alpha$   | 19.8                                  | -5.2                       | 1.0                    | 0.9                    |
|            | $\beta\beta\alpha\alpha\alpha$   | 21.8                                  | -2.4                       | 1.5                    | 4.2                    |
| sextet     | $\alpha\alpha\alpha\beta\beta$   | 20.1                                  | -5.1                       | 0.2                    | 0.2                    |
|            | $\alpha\alpha\beta\alpha\beta$   | 18.2                                  | 4.6                        | 1.6                    | 11.4                   |
|            | $\alpha\beta\alpha\alpha\beta$   | 19.3                                  | 17.9                       | 1.6                    | 24.7                   |
|            | $\beta\alpha\alpha\alpha\beta$   | 18.9                                  | 17.6                       | 1.9                    | 24.7                   |
| octet      | $\alpha\alpha\alpha\beta\alpha$  | 18.1                                  | 5.5                        | 1.4                    | 12.0                   |
|            | $\alpha\alpha\beta\alpha\alpha$  | 20.2                                  | -5.3                       | 0.2                    | 0.0                    |
|            | $\alpha\beta\alpha\alpha\alpha$  | 21.8                                  | -2.4                       | 0.6                    | 3.3                    |
|            | $\beta\alpha\alpha\alpha\alpha$  | 21.9                                  | -2.8                       | 0.6                    | 2.9                    |
| 12-et      | $\alpha\alpha\alpha\alpha\beta$  | 18.9                                  | 17.6                       | 1.2                    | 24.0                   |
| 14-et      | $\alpha\alpha\alpha\alpha\alpha$ | 21.7                                  | -2.5                       | 0.0                    | 2.6                    |

| Spin state | Spin topology<br>(Mn1~Mn4-O8) | Mulliken spin density |       |       |  |
|------------|-------------------------------|-----------------------|-------|-------|--|
|            |                               | Rea                   | TS    | Pro   |  |
| doublet    | $\alpha$ Mn1                  | 2.96                  | 2.96  | 2.96  |  |
|            | $\alpha$ Mn2                  | 2.94                  | 2.94  | 2.94  |  |
|            | $\beta$ Mn3                   | -2.86                 | -2.88 | -2.83 |  |
|            | $\beta$ Mn4                   | -2.88                 | -2.59 | -2.00 |  |
|            | $\alpha$ O8                   | 0.93                  | 0.50  | 0.00  |  |
|            | $\alpha$ Mn1                  | 2.95                  | 2.96  | 2.96  |  |
|            | $\beta$ Mn2                   | -2.92                 | -2.92 | -2.91 |  |
|            | $\alpha$ Mn3                  | 2.85                  | 2.91  | 3.05  |  |
|            | $\beta$ Mn4                   | -2.84                 | -2.52 | -2.05 |  |

|  |          |     |       |       |       |
|--|----------|-----|-------|-------|-------|
|  | $\alpha$ | O8  | 0.94  | 0.48  | 0.00  |
|  | $\alpha$ | Mn1 | 2.95  | 2.96  | 2.95  |
|  | $\beta$  | Mn2 | -2.94 | -2.93 | -2.93 |
|  | $\beta$  | Mn3 | -2.91 | -2.88 | -2.84 |
|  | $\alpha$ | Mn4 | 2.83  | 3.27  | 3.85  |
|  | $\alpha$ | O8  | 0.98  | 0.51  | 0.00  |
|  | $\beta$  | Mn1 | -2.95 | -2.95 | -2.91 |
|  | $\alpha$ | Mn2 | 2.94  | 2.94  | 2.94  |
|  | $\alpha$ | Mn3 | 2.88  | 2.94  | 3.85  |
|  | $\beta$  | Mn4 | -2.84 | -2.53 | -2.69 |
|  | $\alpha$ | O8  | 0.95  | 0.48  | 0.00  |
|  | $\beta$  | Mn1 | -2.96 | -2.97 | -2.96 |
|  | $\alpha$ | Mn2 | 2.91  | 2.91  | 2.92  |
|  | $\beta$  | Mn3 | -2.88 | -2.86 | -2.81 |
|  | $\alpha$ | Mn4 | 2.83  | 3.27  | 3.85  |
|  | $\alpha$ | O8  | 0.98  | 0.51  | 0.01  |
|  | $\beta$  | Mn1 | -2.96 | -2.97 | -2.96 |
|  | $\beta$  | Mn2 | -2.94 | -2.94 | -2.94 |
|  | $\alpha$ | Mn3 | 2.90  | 2.91  | 2.94  |
|  | $\alpha$ | Mn4 | 2.88  | 3.36  | 3.86  |
|  | $\alpha$ | O8  | 0.98  | 0.48  | 0.00  |
|  | $\alpha$ | Mn1 | 2.97  | 2.98  | 2.97  |
|  | $\alpha$ | Mn2 | 2.96  | 2.95  | 2.95  |
|  | $\alpha$ | Mn3 | 2.92  | 2.89  | 2.84  |
|  | $\beta$  | Mn4 | -2.83 | -3.27 | -3.85 |
|  | $\beta$  | O8  | -0.98 | -0.51 | 0.00  |
|  | $\alpha$ | Mn1 | 2.96  | 2.96  | 2.91  |
|  | $\alpha$ | Mn2 | 2.94  | 2.94  | 2.91  |
|  | $\beta$  | Mn3 | -2.85 | -2.91 | -3.82 |
|  | $\alpha$ | Mn4 | 2.84  | 2.53  | 2.69  |
|  | $\beta$  | O8  | -0.94 | -0.48 | 0.00  |
|  | $\alpha$ | Mn1 | 2.96  | 2.95  | 2.95  |
|  | $\beta$  | Mn2 | -2.92 | -2.92 | -2.92 |
|  | $\alpha$ | Mn3 | 2.86  | 2.88  | 2.83  |
|  | $\alpha$ | Mn4 | 2.88  | 2.59  | 2.01  |
|  | $\beta$  | O8  | -0.93 | -0.50 | 0.00  |
|  | $\beta$  | Mn1 | -2.95 | -2.95 | -2.95 |
|  | $\alpha$ | Mn2 | 2.94  | 2.94  | 2.93  |
|  | $\alpha$ | Mn3 | 2.90  | 2.92  | 2.87  |
|  | $\alpha$ | Mn4 | 2.88  | 2.59  | 2.01  |
|  | $\beta$  | O8  | -0.94 | -0.50 | 0.00  |
|  | $\alpha$ | Mn1 | 2.97  | 2.97  | 2.96  |
|  | $\alpha$ | Mn2 | 2.96  | 2.96  | 2.96  |
|  | $\alpha$ | Mn3 | 2.89  | 2.94  | 3.86  |

|       |          |     |       |       |       |
|-------|----------|-----|-------|-------|-------|
|       | $\beta$  | Mn4 | -2.84 | -2.52 | -2.69 |
|       | $\alpha$ | O8  | 0.95  | 0.48  | 0.00  |
|       | $\alpha$ | Mn1 | 2.96  | 2.97  | 2.96  |
|       | $\alpha$ | Mn2 | 2.94  | 2.94  | 2.94  |
|       | $\beta$  | Mn3 | -2.88 | -2.85 | -2.81 |
|       | $\alpha$ | Mn4 | 2.83  | 3.27  | 3.85  |
|       | $\alpha$ | O8  | 0.98  | 0.51  | 0.00  |
|       | $\alpha$ | Mn1 | 2.96  | 2.97  | 2.96  |
|       | $\beta$  | Mn2 | -2.91 | -2.91 | -2.92 |
|       | $\alpha$ | Mn3 | 2.90  | 2.92  | 2.93  |
|       | $\alpha$ | Mn4 | 2.88  | 3.36  | 3.86  |
|       | $\alpha$ | O8  | 0.98  | 0.48  | 0.00  |
|       | $\beta$  | Mn1 | -2.95 | -2.96 | -2.95 |
|       | $\alpha$ | Mn2 | 2.94  | 2.93  | 2.93  |
|       | $\alpha$ | Mn3 | 2.93  | 2.95  | 2.97  |
|       | $\alpha$ | Mn4 | 2.88  | 3.36  | 3.86  |
|       | $\alpha$ | O8  | 0.98  | 0.48  | 0.00  |
| 12-et | $\alpha$ | Mn1 | 2.97  | 2.96  | 2.97  |
|       | $\alpha$ | Mn2 | 2.96  | 2.96  | 2.95  |
|       | $\alpha$ | Mn3 | 2.90  | 2.92  | 2.87  |
|       | $\alpha$ | Mn4 | 2.88  | 2.59  | 2.01  |
|       | $\alpha$ | O8  | -0.93 | -0.50 | 0.00  |
| 14-et | $\alpha$ | Mn1 | 2.97  | 2.99  | 2.97  |
|       | $\alpha$ | Mn2 | 2.96  | 2.95  | 2.95  |
|       | $\alpha$ | Mn3 | 2.93  | 2.95  | 2.97  |
|       | $\alpha$ | Mn4 | 2.88  | 3.36  | 3.86  |
|       | $\alpha$ | O8  | 0.98  | 0.48  | 0.00  |

**Rea:**

|    |             |             |             |   |             |             |             |
|----|-------------|-------------|-------------|---|-------------|-------------|-------------|
| Ca | 1.90707100  | 1.04576200  | -1.68759400 | O | 1.55789100  | -2.75134100 | -3.36844300 |
| Mn | -1.08966900 | 1.62813400  | -0.14056900 | O | 2.71978800  | -4.69709500 | -1.29548900 |
| Mn | 1.10395400  | 1.38243600  | 1.52227800  | H | 3.62977100  | -4.32940500 | -1.29956500 |
| Mn | 0.90363600  | -1.26082300 | 0.57570600  | H | 2.50422300  | -4.81691100 | -0.34852700 |
| Mn | 1.76964000  | -2.75275700 | -1.50839300 | O | 3.86446300  | -0.18692300 | -2.26770700 |
| O  | 0.54102700  | 2.35984600  | 0.10147700  | C | 4.35925800  | -1.30929400 | -2.06355900 |
| O  | -0.35271500 | 0.29141700  | 0.95752500  | O | 3.69256200  | -2.38416000 | -1.78856800 |
| O  | 2.08385700  | 0.11457200  | 0.66696200  | C | 5.87689200  | -1.46501700 | -2.14655700 |
| O  | 0.97828200  | -1.20236700 | -1.27151800 | H | 6.16882000  | -1.10657600 | -3.14410200 |
| O  | 1.98060400  | -2.65722900 | 0.30366900  | H | 6.29405500  | -0.73351500 | -1.44002300 |
| O  | 1.77231800  | 3.23181200  | -2.78887300 | C | 6.43625800  | -2.86203500 | -1.87862300 |
| H  | 2.08209100  | 3.80592300  | -2.06491600 | H | 6.04785200  | -3.59458300 | -2.59772500 |
| H  | 0.82904900  | 3.47271600  | -2.94777400 | H | 6.18025300  | -3.20575000 | -0.86851800 |
| O  | 1.70133600  | -0.11379100 | -3.94842900 | H | 7.53034300  | -2.85769300 | -1.96374800 |
| H  | 1.55245700  | -1.10586900 | -3.77377500 | O | -1.90799100 | 3.23420600  | -0.90320900 |
| H  | 2.35658200  | -3.11182400 | -3.79458300 | C | -1.70474400 | 3.84556600  | -2.02296500 |



|   |             |             |             |   |             |             |             |
|---|-------------|-------------|-------------|---|-------------|-------------|-------------|
| O | -0.99816300 | 3.40861800  | -2.96231200 | H | -1.72940900 | -5.30995700 | -0.80973000 |
| C | -2.41387700 | 5.19097600  | -2.13806500 | C | -0.77180200 | -3.44408600 | -0.41172900 |
| H | -3.45223800 | 5.04702000  | -1.80593700 | O | -0.71445200 | -2.51444600 | 0.43312200  |
| H | -1.95894800 | 5.85725000  | -1.38742500 | O | 0.11820000  | -3.74059400 | -1.28665600 |
| C | -2.35752800 | 5.82507300  | -3.53066000 | O | -1.89725300 | 2.40680100  | 1.54630900  |
| H | -2.80758300 | 5.13688600  | -4.25966700 | C | -1.21057800 | 2.80497600  | 2.54336700  |
| H | -1.30830300 | 5.93819400  | -3.83419000 | O | 0.01822100  | 2.57460900  | 2.73031700  |
| C | -3.06944900 | 7.18136700  | -3.58165500 | C | -1.94924500 | 3.64694900  | 3.57674800  |
| H | -4.13091500 | 7.08745500  | -3.31189600 | H | -2.93533100 | 3.18723300  | 3.72868700  |
| H | -2.61417000 | 7.89890100  | -2.88436500 | H | -2.14683000 | 4.61714400  | 3.09502800  |
| H | -3.01894000 | 7.61749300  | -4.58770100 | C | -1.20614000 | 3.83795600  | 4.89915600  |
| N | -2.89004500 | 0.59222600  | -0.31891600 | H | -1.79475800 | 4.46784800  | 5.57826500  |
| C | -3.29902100 | -0.14379400 | -1.41090600 | H | -1.02412400 | 2.87613500  | 5.39391100  |
| H | -2.70379800 | -0.15662300 | -2.31336300 | H | -0.23274300 | 4.31359900  | 4.73803800  |
| C | -4.47007600 | -0.79605600 | -1.10645400 | O | 3.31920800  | 2.62685200  | -0.37976500 |
| N | -4.76328800 | -0.42600300 | 0.20179100  | C | 3.42074000  | 2.90853600  | 0.83011400  |
| H | -5.42894900 | -0.92722200 | 0.79576500  | O | 2.63610500  | 2.49467500  | 1.77989300  |
| C | -3.78035200 | 0.39172600  | 0.64207400  | C | 4.54680800  | 3.80316400  | 1.32175700  |
| H | -3.72265600 | 0.81026000  | 1.63577800  | H | 5.23606000  | 3.20873500  | 1.93575000  |
| C | -5.33932800 | -1.69186700 | -1.95009000 | H | 4.14665800  | 4.59926100  | 1.96048300  |
| H | -5.90413000 | -1.09098000 | -2.67882200 | H | 5.09111600  | 4.23004900  | 0.47490100  |
| H | -4.68208200 | -2.33995500 | -2.54638600 | O | 1.41225700  | 0.43760700  | 3.25214300  |
| C | -6.36565400 | -2.56174500 | -1.17876500 | C | 1.24128700  | -0.80625100 | 3.42075600  |
| H | -7.16852900 | -1.93479000 | -0.77456300 | O | 0.91320500  | -1.63445400 | 2.51206000  |
| H | -6.82627800 | -3.26409300 | -1.88691100 | C | 1.46629700  | -1.37820300 | 4.81212000  |
| C | -5.74562100 | -3.29775100 | 0.00607700  | H | 0.78217500  | -2.22828000 | 4.93531600  |
| O | -5.81079800 | -2.83779900 | 1.15332200  | H | 2.48256700  | -1.80600700 | 4.80666900  |
| N | -5.06793200 | -4.44017500 | -0.28261100 | C | 1.32458400  | -0.36945600 | 5.95717000  |
| H | -5.01966600 | -4.73704800 | -1.24954200 | H | 0.30983900  | 0.05472500  | 5.94125600  |
| C | -4.17714400 | -5.08288000 | 0.68821700  | H | 2.00789600  | 0.47084400  | 5.78176400  |
| H | -4.69648100 | -5.09223400 | 1.65201300  | C | 1.60133800  | -1.00327000 | 7.32478900  |
| H | -4.03871200 | -6.12339500 | 0.36776000  | H | 0.90905500  | -1.83157000 | 7.53207200  |
| C | -2.82713300 | -4.35937600 | 0.83541100  | H | 1.49084400  | -0.26690000 | 8.13127600  |
| H | -3.00531900 | -3.34084800 | 1.19706000  | H | 2.62310700  | -1.40501200 | 7.37847400  |
| H | -2.24332700 | -4.87066400 | 1.61418600  | O | -0.60858600 | 1.00817000  | -1.78859900 |
| C | -2.02553100 | -4.30922400 | -0.46889100 | H | -0.81958600 | 1.75650200  | -2.41210600 |
| H | -2.63896600 | -3.87655700 | -1.27500100 |   |             |             |             |

**TS:**

|    |             |             |             |   |             |             |             |
|----|-------------|-------------|-------------|---|-------------|-------------|-------------|
| Ca | 2.24728800  | 0.27635700  | -1.52995400 | O | -0.29854600 | 0.39508000  | 0.97134600  |
| Mn | -0.50676700 | 1.84197800  | -0.21521100 | O | 1.98053900  | -0.55361600 | 0.83232100  |
| Mn | 1.40340000  | 0.97876400  | 1.59077800  | O | 0.52686000  | -1.39718100 | -1.11973700 |
| Mn | 0.42449300  | -1.50098100 | 0.68877200  | O | 1.08864300  | -3.12744100 | 0.37954500  |
| Mn | 0.86402500  | -3.11311300 | -1.42973300 | O | 2.91112900  | 2.25868100  | -2.80012700 |
| O  | 1.25149800  | 2.02192300  | 0.10441300  | H | 3.43804800  | 2.70478900  | -2.11092000 |

|   |             |             |             |   |             |             |             |
|---|-------------|-------------|-------------|---|-------------|-------------|-------------|
| H | 2.12815100  | 2.83583500  | -2.96743800 | H | -7.45174800 | -1.02698900 | -2.10206100 |
| O | 0.91080400  | -0.84547100 | -3.72612900 | C | -6.51151300 | -1.31983000 | -0.15759200 |
| H | 0.12898400  | -0.63402900 | -3.16569800 | O | -6.47365600 | -0.81057400 | 0.97041100  |
| H | 1.58686200  | -2.82186100 | -3.80787600 | N | -6.22387400 | -2.63002700 | -0.37321100 |
| O | 0.72608500  | -2.61152300 | -3.39535500 | H | -6.22967400 | -2.97052700 | -1.32693200 |
| O | 1.15029400  | -5.26805600 | -1.45212400 | C | -5.61472800 | -3.47197800 | 0.66199300  |
| H | 2.13029100  | -5.19379400 | -1.49745300 | H | -6.13858200 | -3.26391600 | 1.60044200  |
| H | 0.93895900  | -5.47803400 | -0.52221000 | H | -5.80830400 | -4.51757100 | 0.39015500  |
| O | 3.81142500  | -1.42586000 | -2.05186400 | C | -4.10849200 | -3.20943700 | 0.83763600  |
| C | 3.88627700  | -2.66917300 | -1.99143600 | H | -3.96105700 | -2.16880700 | 1.14670900  |
| O | 2.87114600  | -3.46368500 | -1.90797000 | H | -3.74102500 | -3.83434300 | 1.66389300  |
| C | 5.27009400  | -3.31619700 | -2.03803400 | C | -3.29859500 | -3.49142600 | -0.43039700 |
| H | 5.74698100  | -2.96568100 | -2.96476000 | H | -3.72389500 | -2.94211600 | -1.28513100 |
| H | 5.84760600  | -2.85742300 | -1.22288700 | H | -3.32933100 | -4.55411200 | -0.70701500 |
| C | 5.30905700  | -4.84128700 | -1.94433200 | C | -1.83066900 | -3.07192600 | -0.37481800 |
| H | 4.75080600  | -5.30769100 | -2.76583600 | O | -1.47718800 | -2.24783200 | 0.51452700  |
| H | 4.87780800  | -5.19213500 | -0.99809000 | O | -1.09143600 | -3.59017500 | -1.27853400 |
| H | 6.34433100  | -5.20227700 | -1.99372200 | O | -1.10666500 | 2.90711500  | 1.38836900  |
| O | -0.71914600 | 3.60547400  | -1.05854100 | C | -0.386      |             |             |
| C | -0.19917200 | 4.09691000  | -2.13286100 | H | -0.74310800 | 5.14620700  | 2.86289900  |
| O | 0.40634200  | 3.43080700  | -3.00738900 | C | -0.19220800 | 4.19614100  | 4.74503400  |
| C | -0.37472500 | 5.60402500  | -2.28462200 | H | -0.59188300 | 5.00707500  | 5.36717300  |
| H | -1.39284100 | 5.85725100  | -1.95760700 | H | -0.34626800 | 3.24836500  | 5.27499200  |
| H | 0.29573200  | 6.07563000  | -1.54728000 | H | 0.88822800  | 4.33977400  | 4.63665400  |
| C | -0.08768400 | 6.14042600  | -3.69017400 | O | 3.98867900  | 1.45408000  | -0.21340300 |
| H | -0.76283800 | 5.65307900  | -4.40791400 | C | 4.10560500  | 1.73477900  | 0.99684000  |
| H | 0.92778900  | 5.84759800  | -3.98722200 | O | 3.19274800  | 1.58621800  | 1.90762200  |
| C | -0.24497600 | 7.66247000  | -3.77630600 | C | 5.41304200  | 2.29423300  | 1.53318700  |
| H | -1.26472600 | 7.97604800  | -3.51176400 | H | 5.87272000  | 1.55491500  | 2.20201100  |
| H | 0.44581600  | 8.17514400  | -3.09195600 | H | 5.22319700  | 3.19615400  | 2.12687100  |
| H | -0.03783900 | 8.02520700  | -4.79141300 | H | 6.09910100  | 2.51564600  | 0.71099200  |
| N | -2.53755600 | 1.43036300  | -0.47362300 | O | 1.30768800  | 0.06032700  | 3.35187900  |
| C | -3.12985300 | 0.83929900  | -1.56930300 | C | 0.78991900  | -1.08314400 | 3.53720400  |
| H | -2.55048200 | 0.63107400  | -2.45756800 | O | 0.27712400  | -1.81571300 | 2.63366600  |
| C | -4.45309300 | 0.58806600  | -1.29247800 | C | 0.79860700  | -1.64650400 | 4.95009200  |
| N | -4.64774900 | 1.05670600  | 0.00183100  | H | -0.09211900 | -2.27912000 | 5.05974900  |
| H | -5.45728800 | 0.81122900  | 0.57901300  | H | 1.66334900  | -2.32878500 | 5.00175900  |
| C | -3.47076400 | 1.53599600  | 0.46196400  | C | 0.88740900  | -0.59887500 | 6.06529100  |
| H | -3.31089300 | 1.93456200  | 1.45249200  | H | 0.02450400  | 0.07951500  | 5.99309300  |
| C | -5.53502400 | -0.02284100 | -2.14540100 | H | 1.77716800  | 0.02240600  | 5.90376400  |
| H | -5.84954300 | 0.69008800  | -2.92238200 | C | 0.93054500  | -1.23743400 | 7.45781100  |
| H | -5.10246700 | -0.87714000 | -2.68481600 | H | 0.03421400  | -1.84389700 | 7.65041400  |
| C | -6.81401900 | -0.47835500 | -1.39548400 | H | 0.98971800  | -0.47181100 | 8.24220000  |
| H | -7.38401300 | 0.39223400  | -1.05173400 | H | 1.80452100  | -1.89498100 | 7.56773700  |

|             |             |             |             |   |             |             |             |
|-------------|-------------|-------------|-------------|---|-------------|-------------|-------------|
| O           | -0.16417600 | 1.06561900  | -1.85569300 | H | -0.04610500 | 1.84693700  | -2.46413100 |
| <b>Pro:</b> |             |             |             |   |             |             |             |
| Ca          | 2.47193000  | 0.48809500  | -1.08390200 | H | 0.18385100  | 7.78604000  | -5.16160000 |
| Mn          | -0.51637500 | 1.81946400  | -0.29256700 | N | -2.46705000 | 1.29616800  | -0.82272000 |
| Mn          | 1.16020200  | 1.10978800  | 1.79415200  | C | -2.85295500 | 0.51382800  | -1.89180900 |
| Mn          | 0.46812600  | -1.44158000 | 0.78245100  | H | -2.13027600 | 0.18936800  | -2.62721500 |
| Mn          | 1.24207900  | -3.16016600 | -1.12950900 | C | -4.19861800 | 0.24829000  | -1.79905200 |
| O           | 1.16613900  | 2.12453400  | 0.27508400  | N | -4.62028600 | 0.90411700  | -0.64819300 |
| O           | -0.39900700 | 0.42175800  | 0.94742900  | H | -5.50427300 | 0.69874300  | -0.17337100 |
| O           | 1.92854300  | -0.38448000 | 1.14028700  | C | -3.54822700 | 1.50223700  | -0.08299800 |
| O           | 0.83334400  | -1.39243000 | -1.00897800 | H | -3.56516400 | 2.05524100  | 0.84408500  |
| O           | 1.32322900  | -3.01104600 | 0.67012600  | C | -5.10817000 | -0.53800500 | -2.70718900 |
| O           | 2.83242100  | 2.05251600  | -2.90381700 | H | -5.32337800 | 0.04073400  | -3.61813200 |
| H           | 3.60496100  | 2.62536200  | -3.02886100 | H | -4.56190200 | -1.42974800 | -3.04427000 |
| H           | 2.03039800  | 2.59522400  | -3.11574100 | C | -6.47126700 | -0.96206700 | -2.09905600 |
| O           | 0.24981100  | -1.56958700 | -3.54733600 | H | -7.12356900 | -0.08932000 | -1.98083700 |
| H           | 0.21419500  | -1.20932300 | -2.61165700 | H | -6.96579000 | -1.64554000 | -2.80279100 |
| H           | 1.85068900  | -2.64383500 | -3.55120800 | C | -6.33039000 | -1.59663000 | -0.71726800 |
| O           | 0.92275900  | -2.84424400 | -3.30063600 | O | -6.47825700 | -0.92534500 | 0.31282500  |
| O           | 1.93586400  | -5.17494300 | -1.00640300 | N | -5.97137400 | -2.90679200 | -0.69050200 |
| H           | 2.85943200  | -4.95347700 | -1.27374900 | H | -5.81394200 | -3.37225100 | -1.57621600 |
| H           | 1.94661900  | -5.32980600 | -0.04231400 | C | -5.44813800 | -3.54486300 | 0.52268700  |
| O           | 3.93610100  | -1.10104800 | -2.02666500 | H | -6.05114900 | -3.18213300 | 1.36074700  |
| C           | 4.19984100  | -2.32934100 | -2.03530900 | H | -5.61497500 | -4.62562500 | 0.42641700  |
| O           | 3.30995400  | -3.25642300 | -2.02476300 | C | -3.96178500 | -3.22614000 | 0.76470200  |
| C           | 5.67034900  | -2.74152700 | -2.09384200 | H | -3.84424500 | -2.14282100 | 0.88157600  |
| H           | 6.07150700  | -2.33384900 | -3.03381700 | H | -3.65892600 | -3.67525900 | 1.72114300  |
| H           | 6.18453600  | -2.18694100 | -1.29630400 | C | -3.04951900 | -3.72676400 | -0.35806300 |
| C           | 5.94939900  | -4.24080200 | -1.99081700 | H | -3.42698600 | -3.39349000 | -1.33783800 |
| H           | 5.44917600  | -4.79589200 | -2.79353200 | H | -3.02744800 | -4.82444500 | -0.40373400 |
| H           | 5.59995600  | -4.64536600 | -1.03172300 | C | -1.59736400 | -3.24798300 | -0.30966600 |
| H           | 7.02671800  | -4.43824700 | -2.06124000 | O | -1.33309900 | -2.27377200 | 0.47186300  |
| O           | -0.68228000 | 3.53469300  | -1.25757600 | O | -0.78851300 | -3.83704400 | -1.07807300 |
| C           | -0.20069300 | 3.95980700  | -2.37308700 | O | -1.37659500 | 2.91563200  | 1.15785600  |
| O           | 0.41157400  | 3.25438800  | -3.21553900 | C | -0.83419200 | 3.16886700  | 2.28599900  |
| C           | -0.44831700 | 5.44149600  | -2.63960300 | O | 0.20361100  | 2.61771600  | 2.74514400  |
| H           | -1.53251300 | 5.60987600  | -2.55443600 | C | -1.51347000 | 4.24585800  | 3.12364000  |
| H           | -0.00221200 | 5.99929200  | -1.80181900 | H | -2.59135600 | 4.03082100  | 3.11874900  |
| C           | 0.08207900  | 5.95032900  | -3.98249800 | H | -1.39868000 | 5.18749900  | 2.56542300  |
| H           | -0.36490900 | 5.36105800  | -4.79459800 | C | -0.97665200 | 4.38407300  | 4.54816100  |
| H           | 1.16394300  | 5.76565100  | -4.03803000 | H | -1.50593900 | 5.18711000  | 5.07683000  |
| C           | -0.20441500 | 7.44103100  | -4.19451800 | H | -1.10880000 | 3.45379800  | 5.11330100  |
| H           | -1.28393600 | 7.64704100  | -4.17639900 | H | 0.09389300  | 4.61651400  | 4.54432700  |
| H           | 0.26150100  | 8.05416000  | -3.41019600 | O | 4.02984900  | 1.56205400  | 0.42985900  |

|   |             |             |            |   |             |             |             |
|---|-------------|-------------|------------|---|-------------|-------------|-------------|
| C | 3.91800700  | 1.91810900  | 1.62042400 | H | 1.24363200  | -1.96881100 | 5.32908300  |
| O | 2.85021500  | 1.82346900  | 2.35259100 | C | -0.10113600 | -0.46162400 | 6.12505700  |
| C | 5.09923000  | 2.53600700  | 2.35035900 | H | -1.06570100 | -0.00704700 | 5.85360700  |
| H | 5.31135900  | 1.96459500  | 3.26219100 | H | 0.63875900  | 0.34796200  | 6.09880200  |
| H | 4.84510400  | 3.55784000  | 2.65959100 | C | -0.18849600 | -1.05743100 | 7.53416900  |
| H | 5.98099700  | 2.55196100  | 1.70413100 | H | -0.94227300 | -1.85561900 | 7.58751300  |
| O | 0.87379800  | 0.21291600  | 3.53323100 | H | -0.46170900 | -0.29115900 | 8.27121100  |
| C | 0.42058100  | -0.96706800 | 3.66013200 | H | 0.77364400  | -1.48951000 | 7.84373200  |
| O | 0.09674400  | -1.73969800 | 2.70715200 | O | 0.09615400  | 0.97844300  | -1.81157700 |
| C | 0.27301700  | -1.51301200 | 5.07213300 | H | 0.10252800  | 1.68663400  | -2.50982900 |
| H | -0.45681500 | -2.33152800 | 5.04099100 |   |             |             |             |

**Table S29** Reaction parameters for the open-cubane W3 (hydroxyl)-Wx (hydroxyl) coupling:

| Spin state | Spin topology<br>(Mn1~Mn4-O8)    | Gibbs Free energy (a.u.) |            |            |
|------------|----------------------------------|--------------------------|------------|------------|
|            |                                  | Rea                      | TS         | Pro        |
| doublet    | $\alpha\alpha\beta\alpha$        | -3366.1931               | -3366.1803 | -3366.2072 |
|            | $\alpha\beta\alpha\beta$         | -3366.1940               | -3366.1819 | -3366.2095 |
|            | $\alpha\beta\beta\alpha\alpha$   | -3366.1935               | -3366.1815 | -3366.2096 |
|            | $\beta\alpha\alpha\beta\alpha$   | -3366.1941               | -3366.1646 | -3366.1702 |
|            | $\beta\alpha\beta\alpha\alpha$   | -3366.1944               | -3366.1683 | -3366.1707 |
|            | $\beta\beta\alpha\alpha\alpha$   | -3366.1923               | -3366.1662 | -3366.1706 |
| sextet     | $\alpha\alpha\alpha\beta\beta$   | -3366.1949               | -3366.1668 | -3366.1716 |
|            | $\alpha\alpha\beta\alpha\beta$   | -3366.1935               | -3366.1666 | -3366.1708 |
|            | $\alpha\beta\alpha\alpha\beta$   | -3366.1929               | -3366.1652 | -3366.1693 |
|            | $\beta\alpha\alpha\alpha\beta$   | -3366.2092               | -3366.1879 | -3366.2101 |
| octet      | $\alpha\alpha\alpha\beta\alpha$  | -3366.1938               | -3366.1800 | -3366.2087 |
|            | $\alpha\alpha\beta\alpha\alpha$  | -3366.1945               | -3366.1818 | -3366.2084 |
|            | $\alpha\beta\alpha\alpha\alpha$  | -3366.1945               | -3366.1825 | -3366.2099 |
|            | $\beta\alpha\alpha\alpha\alpha$  | -3366.1940               | -3366.1675 | -3366.1722 |
| 12-et      | $\alpha\alpha\alpha\alpha\beta$  | -3366.2015               | -3366.1744 | -3366.1780 |
| 14-et      | $\alpha\alpha\alpha\alpha\alpha$ | -3366.1957               | -3366.1826 | -3366.2094 |

  

| Spin state | Spin topology<br>(Mn1~Mn4-O8)  | Relative Gibbs Free energy (kcal/mol) |                            |                        |                        |
|------------|--------------------------------|---------------------------------------|----------------------------|------------------------|------------------------|
|            |                                | $\Delta G^\ddagger(\text{Rea-TS})$    | $\Delta G(\text{Rea-Pro})$ | $\Delta G(\text{Rea})$ | $\Delta G(\text{Pro})$ |
| doublet    | $\alpha\alpha\beta\beta\alpha$ | 18.8                                  | -7.2                       | 1.1                    | 2.5                    |
|            | $\alpha\beta\alpha\beta\alpha$ | 17.9                                  | -8.3                       | 0.9                    | 1.2                    |
|            | $\alpha\beta\beta\alpha\alpha$ | 16.8                                  | -9.4                       | 1.4                    | 0.6                    |
|            | $\beta\alpha\alpha\beta\alpha$ | 36.8                                  | 22.6                       | 1.4                    | 32.6                   |
|            | $\beta\alpha\beta\alpha\alpha$ | 35.9                                  | 21.5                       | 1.5                    | 31.6                   |
|            | $\beta\beta\alpha\alpha\alpha$ | 36.5                                  | 22.0                       | 1.6                    | 32.2                   |
| sextet     | $\alpha\alpha\alpha\beta\beta$ | 31.4                                  | 19.0                       | 0.4                    | 28.0                   |
|            | $\alpha\alpha\beta\alpha\beta$ | 32.0                                  | 19.5                       | 0.3                    | 28.4                   |

|       |                            |      |      |     |      |
|-------|----------------------------|------|------|-----|------|
|       | $\alpha\beta\alpha\beta$   | 32.1 | 17.6 | 4.1 | 30.3 |
|       | $\beta\alpha\alpha\beta$   | 18.0 | -8.5 | 0.6 | 0.7  |
| octet | $\alpha\alpha\beta\alpha$  | 18.6 | -7.6 | 0.2 | 1.2  |
|       | $\alpha\alpha\beta\alpha$  | 17.3 | -3.8 | 0.8 | 5.5  |
|       | $\alpha\beta\alpha\alpha$  | 16.7 | -9.4 | 0.8 | 0.0  |
|       | $\beta\alpha\alpha\alpha$  | 37.3 | 22.6 | 0.6 | 31.8 |
| 12-et | $\alpha\alpha\alpha\beta$  | 31.9 | 19.3 | 0.2 | 28.1 |
| 14-et | $\alpha\alpha\alpha\alpha$ | 17.8 | -8.2 | 0.0 | 0.4  |

| Spin state | Spin topology<br>(Mn1~Mn4-O8) |       | Mulliken spin density |       |       |
|------------|-------------------------------|-------|-----------------------|-------|-------|
|            |                               |       | Rea                   | TS    | Pro   |
| doublet    | $\alpha$                      | Mn1   | 2.99                  | 3.46  | 3.90  |
|            | $\alpha$                      | Mn2   | 2.94                  | 2.96  | 2.98  |
|            | $\beta$                       | Mn3   | -2.93                 | -2.93 | -2.92 |
|            | $\beta$                       | Mn4   | -2.89                 | -2.89 | -2.89 |
|            | $\alpha$                      | O8    | 0.92                  | 0.57  | 0.01  |
|            | $\alpha$                      | Mn1   | 2.99                  | 3.45  | 3.91  |
|            | $\beta$                       | Mn2   | -2.92                 | -2.91 | -2.90 |
|            | $\alpha$                      | Mn3   | 2.88                  | 2.89  | 2.91  |
|            | $\beta$                       | Mn4   | -2.84                 | -2.84 | -2.84 |
|            | $\alpha$                      | O8    | 0.92                  | 0.57  | 0.01  |
|            | $\alpha$                      | Mn1   | 2.98                  | 3.43  | 3.90  |
|            | $\beta$                       | Mn2   | -2.94                 | -2.93 | -2.92 |
|            | $\beta$                       | Mn3   | -2.91                 | -2.91 | -2.91 |
|            | $\alpha$                      | Mn4   | 2.84                  | 2.84  | 2.85  |
|            | $\alpha$                      | O8    | 0.92                  | 0.58  | 0.01  |
|            | $\beta$                       | Mn1   | -2.92                 | -2.38 | -1.99 |
|            | $\alpha$                      | Mn2   | 2.94                  | 2.94  | 2.94  |
|            | $\alpha$                      | Mn3   | 2.90                  | 2.92  | 2.95  |
|            | $\beta$                       | Mn4   | -2.83                 | -2.83 | -2.82 |
|            | $\alpha$                      | O8    | 0.89                  | 0.33  | 0.00  |
| $\beta$    | Mn1                           | -2.93 | -2.38                 | -1.99 |       |
| $\alpha$   | Mn2                           | 2.92  | 2.93                  | 2.93  |       |
| $\beta$    | Mn3                           | -2.89 | -2.89                 | -2.91 |       |
| $\alpha$   | Mn4                           | 2.84  | 2.84                  | 2.84  |       |
| $\alpha$   | O8                            | 0.90  | 0.33                  | 0.00  |       |
| sextet     | $\beta$                       | Mn1   | -2.93                 | -2.40 | -2.01 |
|            | $\beta$                       | Mn2   | -2.94                 | -2.95 | -2.97 |
|            | $\alpha$                      | Mn3   | 2.92                  | 2.94  | 2.96  |
|            | $\alpha$                      | Mn4   | 2.89                  | 2.89  | 2.88  |
|            | $\alpha$                      | O8    | 0.90                  | 0.34  | 0.01  |
|            | $\alpha$                      | Mn1   | 2.95                  | 2.40  | 2.02  |
|            | $\alpha$                      | Mn2   | 2.96                  | 2.96  | 2.98  |
|            | $\alpha$                      | Mn3   | 2.91                  | 2.91  | 2.93  |

|       |          |     |       |       |       |
|-------|----------|-----|-------|-------|-------|
|       | $\beta$  | Mn4 | -2.85 | -2.84 | -2.84 |
|       | $\beta$  | O8  | -0.90 | -0.33 | -0.01 |
|       | $\alpha$ | Mn1 | 2.93  | 2.40  | 2.01  |
|       | $\alpha$ | Mn2 | 2.94  | 2.95  | 2.97  |
|       | $\beta$  | Mn3 | -2.87 | -2.90 | -2.93 |
|       | $\alpha$ | Mn4 | 2.83  | 2.83  | 2.82  |
|       | $\beta$  | O8  | -0.90 | -0.34 | -0.01 |
|       | $\alpha$ | Mn1 | 2.93  | 2.38  | 1.99  |
|       | $\beta$  | Mn2 | -2.92 | -2.93 | -2.93 |
|       | $\alpha$ | Mn3 | 2.92  | 2.93  | 2.93  |
|       | $\alpha$ | Mn4 | 2.88  | 2.88  | 2.87  |
|       | $\beta$  | O8  | -0.90 | -0.33 | 0.00  |
|       | $\beta$  | Mn1 | -2.95 | -3.43 | -3.85 |
|       | $\alpha$ | Mn2 | 2.94  | 2.93  | 2.92  |
|       | $\alpha$ | Mn3 | 2.94  | 2.94  | 2.93  |
|       | $\alpha$ | Mn4 | 2.91  | 2.91  | 2.92  |
|       | $\beta$  | O8  | -0.80 | -0.53 | 0.00  |
|       | $\alpha$ | Mn1 | 3.01  | 3.45  | 3.92  |
|       | $\alpha$ | Mn2 | 2.96  | 2.97  | 2.99  |
|       | $\alpha$ | Mn3 | 2.91  | 2.91  | 2.93  |
|       | $\beta$  | Mn4 | -2.84 | -2.84 | -2.83 |
|       | $\alpha$ | O8  | 0.92  | 0.56  | 0.01  |
| octet | $\alpha$ | Mn1 | 2.99  | 3.46  | 3.90  |
|       | $\alpha$ | Mn2 | 2.94  | 2.96  | 2.98  |
|       | $\beta$  | Mn3 | -2.88 | -2.89 | -2.89 |
|       | $\alpha$ | Mn4 | 2.84  | 2.84  | 2.84  |
|       | $\alpha$ | O8  | 0.92  | 0.56  | 0.01  |
|       | $\alpha$ | Mn1 | 2.99  | 3.44  | 3.91  |
|       | $\beta$  | Mn2 | -2.91 | -2.91 | -2.90 |
|       | $\alpha$ | Mn3 | 2.92  | 2.93  | 2.94  |
|       | $\alpha$ | Mn4 | 2.89  | 2.89  | 2.89  |
|       | $\alpha$ | O8  | 0.92  | 0.58  | 0.01  |
|       | $\beta$  | Mn1 | -2.92 | -2.38 | -1.99 |
|       | $\alpha$ | Mn2 | 2.94  | 2.94  | 2.94  |
|       | $\alpha$ | Mn3 | 2.94  | 2.96  | 2.98  |
|       | $\alpha$ | Mn4 | 2.89  | 2.89  | 2.88  |
|       | $\alpha$ | O8  | 0.89  | 0.34  | 0.00  |
| 12-et | $\alpha$ | Mn1 | 2.95  | 2.38  | 2.02  |
|       | $\alpha$ | Mn2 | 2.95  | 2.96  | 2.97  |
|       | $\alpha$ | Mn3 | 2.95  | 2.95  | 2.96  |
|       | $\alpha$ | Mn4 | 2.88  | 2.88  | 2.87  |
|       | $\alpha$ | O8  | -0.88 | -0.32 | -0.01 |
| 14-et | $\alpha$ | Mn1 | 3.01  | 3.48  | 3.92  |
|       | $\alpha$ | Mn2 | 2.96  | 2.98  | 2.99  |

|  |          |     |      |      |      |
|--|----------|-----|------|------|------|
|  | $\alpha$ | Mn3 | 2.95 | 2.96 | 2.96 |
|  | $\alpha$ | Mn4 | 2.89 | 2.89 | 2.89 |
|  | $\alpha$ | O8  | 0.92 | 0.56 | 0.01 |

**Rea:**

|    |             |             |             |   |             |             |             |
|----|-------------|-------------|-------------|---|-------------|-------------|-------------|
| Ca | -0.59203300 | -2.13043300 | -1.70632500 | H | 7.49827800  | -3.62240200 | -2.56501000 |
| Mn | 1.99449200  | -0.34216400 | -0.30931800 | H | 8.03122900  | -2.06843700 | -1.89786200 |
| Mn | 0.40127800  | -1.80557400 | 1.41395800  | H | 7.86708400  | -3.48024700 | -0.83631800 |
| Mn | -1.43221300 | 0.16661600  | 0.57681400  | N | 2.47592700  | 1.68380800  | -0.46194500 |
| Mn | -3.45701100 | 0.60761800  | -1.16593700 | C | 2.18916600  | 2.52210900  | -1.51868100 |
| O  | 1.42201800  | -2.03309500 | -0.08058000 | H | 1.76018100  | 2.12622300  | -2.42881800 |
| O  | 0.57477300  | 0.01895000  | 0.85995900  | C | 2.51248400  | 3.81381800  | -1.17518300 |
| O  | -1.22867200 | -1.64185100 | 0.64584000  | N | 3.01521800  | 3.73066900  | 0.11832700  |
| O  | -1.65993700 | 0.11788600  | -1.22527800 | H | 3.12212000  | 4.53868800  | 0.73839700  |
| O  | -3.23931000 | 0.30498000  | 0.54302400  | C | 2.95793100  | 2.43971300  | 0.51434600  |
| O  | 0.93844200  | -3.51060600 | -3.02759800 | H | 3.24909100  | 2.07956800  | 1.48966400  |
| H  | 1.19369200  | -4.18785100 | -2.37533700 | C | 2.41534200  | 5.09325300  | -1.96552700 |
| H  | 1.75738000  | -2.99735500 | -3.22624200 | H | 3.20562900  | 5.12447100  | -2.73061800 |
| O  | -0.46927000 | -0.37328700 | -3.59931000 | H | 1.46647600  | 5.08047600  | -2.51999100 |
| H  | -0.90946000 | 0.21229200  | -2.92774800 | C | 2.51743800  | 6.40606000  | -1.14585700 |
| H  | -3.14512800 | 2.03854800  | -3.25122800 | H | 3.54145700  | 6.54857800  | -0.78247800 |
| O  | -3.57410000 | 1.16169900  | -3.29535300 | H | 2.28875000  | 7.24866300  | -1.81268600 |
| H  | -4.51815000 | 1.35587200  | -3.05798600 | C | 1.61228500  | 6.41326400  | 0.08396200  |
| O  | -5.16321100 | 1.31557900  | -1.26962300 | O | 2.04641000  | 6.10478500  | 1.20160400  |
| H  | -5.77791400 | 0.57362400  | -1.11997600 | N | 0.30357100  | 6.70838700  | -0.13027100 |
| O  | -2.80825800 | -2.55789500 | -2.34362600 | H | 0.00761700  | 6.92261200  | -1.07459600 |
| C  | -3.96440600 | -2.21315400 | -2.04123600 | C | -0.72515200 | 6.47066200  | 0.88771300  |
| O  | -4.32777100 | -1.05907100 | -1.58280100 | H | -0.32677700 | 6.82468500  | 1.84406000  |
| C  | -5.09770600 | -3.22328800 | -2.22316300 | H | -1.59129800 | 7.09336100  | 0.63016500  |
| H  | -5.04928700 | -3.55200100 | -3.27125100 | C | -1.12023800 | 4.98861800  | 1.00915200  |
| H  | -4.81487500 | -4.10324900 | -1.62725600 | H | -0.24220700 | 4.40694900  | 1.31028000  |
| C  | -6.50253400 | -2.74494300 | -1.85857900 | H | -1.85510500 | 4.89185600  | 1.82075200  |
| H  | -6.80467800 | -1.88899900 | -2.47472100 | C | -1.70045500 | 4.41271900  | -0.28672400 |
| H  | -6.55666900 | -2.43819600 | -0.80730700 | H | -0.99229600 | 4.57144300  | -1.11616500 |
| H  | -7.23183200 | -3.54980500 | -2.01724900 | H | -2.63701300 | 4.90977400  | -0.57060900 |
| O  | 3.66081700  | -0.83089400 | -1.21267000 | C | -1.96528000 | 2.91127600  | -0.25050600 |
| C  | 3.86477300  | -1.42939000 | -2.33955800 | O | -1.27472300 | 2.19731400  | 0.52355600  |
| O  | 2.98314400  | -1.63969500 | -3.20643000 | O | -2.87010800 | 2.49980200  | -1.05579100 |
| C  | 5.30719600  | -1.84991600 | -2.59313200 | O | 3.20930800  | -0.33473800 | 1.29360800  |
| H  | 5.32013300  | -2.46811200 | -3.49918800 | C | 3.08874000  | -1.12788200 | 2.28706000  |
| H  | 5.87668100  | -0.93359300 | -2.81694500 | O | 2.08748300  | -1.85790600 | 2.52449300  |
| C  | 5.96355500  | -2.57722300 | -1.40839100 | C | 4.27528300  | -1.19370800 | 3.24021100  |
| H  | 5.38352400  | -3.48241700 | -1.17286200 | H | 4.62717100  | -0.16485000 | 3.39691400  |
| H  | 5.90419500  | -1.93191700 | -0.52278500 | H | 5.08201600  | -1.70078400 | 2.68848200  |
| C  | 7.42003800  | -2.95871400 | -1.69263900 | C | 3.99310200  | -1.90176300 | 4.56551100  |

|   |             |             |             |   |             |             |             |
|---|-------------|-------------|-------------|---|-------------|-------------|-------------|
| H | 4.89949800  | -1.92479900 | 5.18367400  | C | -1.64161300 | -0.25096100 | 4.84742600  |
| H | 3.20538800  | -1.38780700 | 5.12950900  | H | -1.16234100 | -1.00328500 | 5.48430700  |
| H | 3.65897200  | -2.93128400 | 4.39792600  | H | -1.30185600 | 0.74279500  | 5.17622900  |
| O | -0.32590800 | -4.25705100 | -0.48169100 | C | -3.17640800 | -0.32720800 | 4.95762800  |
| C | -0.10882800 | -4.53519600 | 0.71435000  | H | -3.51272000 | -1.31511800 | 4.60998000  |
| O | 0.19108000  | -3.68790200 | 1.65225600  | H | -3.61590000 | 0.41075400  | 4.27443700  |
| C | -0.19998700 | -5.97154000 | 1.20062500  | C | -3.66684400 | -0.08768200 | 6.38899500  |
| H | -1.08890000 | -6.07713400 | 1.83654300  | H | -3.25374200 | -0.83142300 | 7.08464100  |
| H | 0.67220400  | -6.22169200 | 1.81531700  | H | -4.76131300 | -0.14982900 | 6.44512700  |
| H | -0.28057600 | -6.65608400 | 0.35174200  | H | -3.36949200 | 0.90698300  | 6.75024600  |
| O | -0.38555100 | -1.42844200 | 3.18960400  | O | 1.10502400  | -0.21622200 | -1.92013000 |
| C | -1.16189600 | -0.44888600 | 3.42033500  | H | 1.73551100  | -0.61053800 | -2.58739200 |
| O | -1.57376400 | 0.37978200  | 2.55183800  |   |             |             |             |

**TS:**

|    |             |             |             |   |             |             |             |
|----|-------------|-------------|-------------|---|-------------|-------------|-------------|
| Ca | 0.13238700  | -2.20665600 | -1.70654400 | O | 3.67967300  | 0.50929700  | -1.32059400 |
| Mn | 1.98712300  | 0.40528900  | -0.33018500 | C | 4.08413400  | -0.08054500 | -2.39266800 |
| Mn | 1.03873500  | -1.54172700 | 1.38052300  | O | 3.31979800  | -0.60410500 | -3.24303900 |
| Mn | -1.38667100 | -0.34394400 | 0.62483600  | C | 5.58943900  | -0.07496300 | -2.61732800 |
| Mn | -3.45827200 | -0.60011900 | -1.10881400 | H | 5.80389100  | -0.72137000 | -3.47717300 |
| O  | 2.01457000  | -1.39185400 | -0.14992800 | H | 5.86925900  | 0.95114500  | -2.90499100 |
| O  | 0.52840100  | 0.22223500  | 0.86810800  | C | 6.40245200  | -0.49441300 | -1.38147800 |
| O  | -0.57109400 | -1.96680800 | 0.65390900  | H | 6.11101900  | -1.51348200 | -1.08545400 |
| O  | -1.59904800 | -0.43873100 | -1.18494200 | H | 6.13145700  | 0.16066700  | -0.54380500 |
| O  | -3.13552200 | -0.83751600 | 0.59084000  | C | 7.91298700  | -0.44244900 | -1.63246600 |
| O  | 1.97321800  | -3.03431200 | -3.09451000 | H | 8.20660600  | -1.10845400 | -2.45582000 |
| H  | 2.40215800  | -3.62331700 | -2.44623100 | H | 8.23736900  | 0.57401500  | -1.89668500 |
| H  | 2.61620100  | -2.31109300 | -3.28136300 | H | 8.47292800  | -0.74993900 | -0.73976000 |
| O  | -0.15522700 | -0.18983200 | -3.38691100 | N | 1.69697600  | 2.45367900  | -0.53687700 |
| H  | -0.87397000 | 0.06558200  | -2.75035900 | C | 1.10108200  | 3.12976500  | -1.58214000 |
| H  | -3.68797500 | 0.87100500  | -3.18202600 | H | 0.81342500  | 2.60527400  | -2.48335800 |
| O  | -3.79306000 | -0.09904100 | -3.23119200 | C | 0.96226900  | 4.45579300  | -1.24415900 |
| H  | -4.74166800 | -0.24077100 | -2.97409800 | N | 1.50533300  | 4.56465900  | 0.03076500  |
| O  | -5.30569000 | -0.52468500 | -1.18992100 | H | 1.35110200  | 5.36770600  | 0.64766000  |
| H  | -5.62354500 | -1.43497400 | -1.04459500 | C | 1.91652000  | 3.33987200  | 0.42510500  |
| O  | -1.79574500 | -3.31683000 | -2.41709300 | H | 2.35069900  | 3.11044000  | 1.38713200  |
| C  | -2.99190200 | -3.40094000 | -2.07992400 | C | 0.39249800  | 5.61351600  | -2.02320300 |
| O  | -3.70757700 | -2.46309000 | -1.55346700 | H | 1.08898300  | 5.90850800  | -2.82233600 |
| C  | -3.71779500 | -4.72831500 | -2.29897800 | H | -0.51580700 | 5.26618000  | -2.53533600 |
| H  | -3.58722900 | -4.97678100 | -3.36202500 | C | 0.06717200  | 6.88941400  | -1.20293600 |
| H  | -3.13778100 | -5.48369300 | -1.74890000 | H | 0.99245600  | 7.38418100  | -0.88678300 |
| C  | -5.19165700 | -4.77229900 | -1.89776800 | H | -0.47060000 | 7.59119400  | -1.85502500 |
| H  | -5.78204500 | -4.04499900 | -2.46882100 | C | -0.72763200 | 6.59638200  | 0.06780900  |
| H  | -5.31956100 | -4.54669200 | -0.83247900 | O | -0.16311400 | 6.47514100  | 1.16309500  |
| H  | -5.60841800 | -5.76974800 | -2.08801700 | N | -2.06465400 | 6.40982300  | -0.08344100 |



|   |             |             |             |   |             |             |             |
|---|-------------|-------------|-------------|---|-------------|-------------|-------------|
| H | -2.45949900 | 6.49338100  | -1.01210000 | O | 1.16623200  | -4.10336700 | -0.53051800 |
| C | -2.89417300 | 5.83169800  | 0.97935400  | C | 1.50570000  | -4.28418100 | 0.65833400  |
| H | -2.59941000 | 6.30860200  | 1.91960800  | O | 1.50668800  | -3.38924300 | 1.59546500  |
| H | -3.93523600 | 6.10884700  | 0.77043000  | C | 1.95253400  | -5.65891300 | 1.12660000  |
| C | -2.73673000 | 4.30571500  | 1.10047200  | H | 1.17359000  | -6.08543900 | 1.77247600  |
| H | -1.69648400 | 4.07115700  | 1.35146500  | H | 2.86609200  | -5.57902800 | 1.72654700  |
| H | -3.34882800 | 3.95986700  | 1.94522000  | H | 2.11142200  | -6.32060700 | 0.27056400  |
| C | -3.14232800 | 3.55913400  | -0.17383600 | O | 0.20430300  | -1.49447000 | 3.18092700  |
| H | -2.58572100 | 3.95955500  | -1.03668800 | C | -0.86624100 | -0.86435200 | 3.44299700  |
| H | -4.20847700 | 3.68993200  | -0.40070500 | O | -1.57306500 | -0.23286400 | 2.59665100  |
| C | -2.85562900 | 2.06108700  | -0.15766600 | C | -1.34747100 | -0.85821000 | 4.88357500  |
| O | -1.95627600 | 1.62359600  | 0.60564500  | H | -0.63213800 | -1.42448100 | 5.49102700  |
| O | -3.55993400 | 1.37077900  | -0.97418700 | H | -1.33559500 | 0.18657700  | 5.23007200  |
| O | 3.17471500  | 0.85040100  | 1.31206700  | C | -2.77160200 | -1.42654200 | 5.02691800  |
| C | 3.33904900  | 0.02788500  | 2.26796200  | H | -2.78253500 | -2.46453900 | 4.66296800  |
| O | 2.65284400  | -1.01939300 | 2.46093700  | H | -3.44535600 | -0.85931000 | 4.37221800  |
| C | 4.47170800  | 0.32695200  | 3.24387700  | C | -3.27045700 | -1.38053400 | 6.47462600  |
| H | 4.42221600  | 1.39935200  | 3.47843700  | H | -2.61954800 | -1.96214600 | 7.14232200  |
| H | 5.40696400  | 0.19190500  | 2.67887500  | H | -4.28454900 | -1.79301300 | 6.55459100  |
| C | 4.47363300  | -0.52606900 | 4.51255900  | H | -3.29837900 | -0.34892400 | 6.85325900  |
| H | 5.32603800  | -0.25790300 | 5.14983500  | O | 1.07020900  | 0.14347300  | -2.10049100 |
| H | 3.55285500  | -0.37918300 | 5.08977100  | H | 1.84999600  | -0.06175400 | -2.71141500 |
| H | 4.54170900  | -1.59210700 | 4.26999100  |   |             |             |             |

**Pro:**

|    |             |             |             |   |             |             |             |
|----|-------------|-------------|-------------|---|-------------|-------------|-------------|
| Ca | -1.42885800 | -1.90414100 | -1.55402800 | O | -3.49958800 | -1.41726800 | -2.49907700 |
| Mn | 1.75975300  | -0.95647700 | -0.28650800 | C | -4.46040700 | -0.67760600 | -2.20341000 |
| Mn | -0.19554100 | -1.84184700 | 1.43791200  | O | -4.38717600 | 0.47728500  | -1.63409300 |
| Mn | -1.28955200 | 0.60561700  | 0.65340600  | C | -5.87375400 | -1.15880100 | -2.52965000 |
| Mn | -2.97139100 | 1.72043400  | -1.18497400 | H | -5.87474300 | -1.39647700 | -3.60323000 |
| O  | 0.57008400  | -2.32812300 | -0.14188800 | H | -5.99224600 | -2.12445400 | -2.01672000 |
| O  | 0.51739900  | -0.16248500 | 0.94954600  | C | -7.01434200 | -0.20633000 | -2.17330900 |
| O  | -1.73594900 | -1.14026500 | 0.73677500  | H | -6.92013300 | 0.74606800  | -2.70958800 |
| O  | -1.47087300 | 0.59624200  | -1.19486600 | H | -7.02721500 | 0.01278700  | -1.09912800 |
| O  | -2.93341100 | 1.38584200  | 0.52411400  | H | -7.98057300 | -0.65192000 | -2.44257800 |
| O  | -0.48632200 | -3.50998600 | -3.15058800 | O | 3.03629400  | -1.95043200 | -1.47201400 |
| H  | -0.48328300 | -4.38661000 | -2.72842600 | C | 2.98003500  | -2.59075400 | -2.57350700 |
| H  | 0.45559600  | -3.31176600 | -3.37550300 | O | 2.07026400  | -2.44932000 | -3.44960600 |
| O  | 0.35000800  | 0.62106800  | -3.04617500 | C | 4.12422500  | -3.55290600 | -2.86648800 |
| H  | -0.36609400 | 0.89204300  | -2.39114700 | H | 3.80161200  | -4.22927300 | -3.66818800 |
| H  | -2.15728900 | 2.89321400  | -3.33974800 | H | 4.94649600  | -2.94701800 | -3.28207000 |
| O  | -2.88998800 | 2.24800200  | -3.32876000 | C | 4.62987100  | -4.32808600 | -1.64144400 |
| H  | -3.68027800 | 2.79408500  | -3.07248900 | H | 3.80549700  | -4.92856700 | -1.22809700 |
| O  | -4.30170700 | 3.00194200  | -1.32286100 | H | 4.90716400  | -3.61013800 | -0.85960600 |
| H  | -5.14581400 | 2.53951900  | -1.16664100 | C | 5.81550400  | -5.23937800 | -1.97556800 |

|   |             |             |             |   |             |             |             |
|---|-------------|-------------|-------------|---|-------------|-------------|-------------|
| H | 5.55007500  | -5.98123800 | -2.74192000 | O | 3.04507800  | -1.50142400 | 1.37538000  |
| H | 6.66771000  | -4.65965500 | -2.35788100 | C | 2.58641300  | -2.22278700 | 2.30545200  |
| H | 6.15672200  | -5.78641900 | -1.08712700 | O | 1.35530300  | -2.50724300 | 2.48219000  |
| N | 2.86250000  | 0.78728800  | -0.48367900 | C | 3.58142800  | -2.83159100 | 3.28942700  |
| C | 2.90362800  | 1.71047800  | -1.51141800 | H | 4.33501800  | -2.06173600 | 3.50413900  |
| H | 2.34183300  | 1.54961000  | -2.42292400 | H | 4.11398900  | -3.62042500 | 2.73523900  |
| C | 3.68292000  | 2.77731200  | -1.13115100 | C | 2.96968700  | -3.39464600 | 4.57281900  |
| N | 4.12495400  | 2.46810700  | 0.15026700  | H | 3.75121700  | -3.82692200 | 5.21113400  |
| H | 4.52097700  | 3.15735800  | 0.79468700  | H | 2.45567400  | -2.61117300 | 5.14312800  |
| C | 3.59566900  | 1.27807100  | 0.50830300  | H | 2.23237100  | -4.17279000 | 4.34801700  |
| H | 3.74244700  | 0.79292600  | 1.46257200  | O | -1.89654500 | -3.94282400 | -0.36246300 |
| C | 4.06583200  | 4.02615600  | -1.88172300 | C | -1.68820700 | -4.25739000 | 0.83036400  |
| H | 4.84158800  | 3.79535600  | -2.62738200 | O | -1.04408900 | -3.55478100 | 1.70410200  |
| H | 3.19025900  | 4.35670100  | -2.45763800 | C | -2.22399000 | -5.57095300 | 1.37634100  |
| C | 4.59336700  | 5.20150900  | -1.01759200 | H | -2.99956100 | -5.35986500 | 2.12403400  |
| H | 5.59939500  | 4.97773000  | -0.64515700 | H | -1.42410300 | -6.12145700 | 1.88522500  |
| H | 4.67368000  | 6.09227500  | -1.65556800 | H | -2.64992800 | -6.17544800 | 0.57081800  |
| C | 3.72533800  | 5.47336100  | 0.20875000  | O | -0.79637200 | -1.22475900 | 3.24185800  |
| O | 4.01581200  | 5.00217800  | 1.31567800  | C | -1.24240500 | -0.06132700 | 3.47108500  |
| N | 2.59328400  | 6.19526100  | -0.00089200 | O | -1.41671700 | 0.85289400  | 2.59989800  |
| H | 2.40080200  | 6.52532700  | -0.93851300 | C | -1.60947600 | 0.28950200  | 4.90268100  |
| C | 1.53039000  | 6.28980400  | 1.00523700  | H | -1.36735400 | -0.56727800 | 5.54193600  |
| H | 2.01032400  | 6.47051100  | 1.97263200  | H | -0.97536100 | 1.13507400  | 5.20949400  |
| H | 0.92379700  | 7.17047900  | 0.75866500  | C | -3.09121300 | 0.68583900  | 5.04404600  |
| C | 0.66415300  | 5.02118600  | 1.08873800  | H | -3.72072000 | -0.15470700 | 4.71642100  |
| H | 1.29520500  | 4.17548300  | 1.38268000  | H | -3.30059300 | 1.51848500  | 4.36038100  |
| H | -0.07182200 | 5.15710700  | 1.89357800  | C | -3.45253200 | 1.07300000  | 6.48156700  |
| C | -0.05745600 | 4.69465200  | -0.22275700 | H | -3.26998500 | 0.24321300  | 7.17860800  |
| H | 0.67148300  | 4.62848600  | -1.04656300 | H | -4.51221200 | 1.34835300  | 6.56048900  |
| H | -0.77583000 | 5.47707800  | -0.50043100 | H | -2.85762400 | 1.93168000  | 6.82370600  |
| C | -0.80277600 | 3.36401900  | -0.21758700 | O | 0.61276200  | -0.66960800 | -2.40424100 |
| O | -0.43775000 | 2.47062700  | 0.58828600  | H | 1.21824800  | -1.20058800 | -3.03791200 |
| O | -1.74121700 | 3.26319300  | -1.08442900 |   |             |             |             |

**Table S30** Reaction parameters for the open-cubane W3 (hydroxyl)-W2 (oxo) nucleophilic attack:

| Spin state | Spin topology<br>(Mn1~Mn4-O8) | Gibbs Free energy (a.u.) |            |            |
|------------|-------------------------------|--------------------------|------------|------------|
|            |                               | Rea                      | TS         | Pro        |
| doublet    | $\alpha\alpha\beta\alpha$     | -3365.7150               | -3365.6989 | -3365.7064 |
|            | $\alpha\beta\alpha\beta$      | -3365.7151               | -3365.6999 | -3365.7055 |
|            | $\alpha\beta\beta\alpha$      | -3365.7090               | -3365.6974 | -3365.7464 |
|            | $\beta\alpha\alpha\beta$      | -3365.7158               | -3365.6999 | -3365.7087 |
|            | $\beta\alpha\beta\alpha$      | -3365.7085               | -3365.6961 | -3365.7454 |
|            | $\beta\beta\alpha\alpha$      | -3365.7083               | -3365.6950 | -3365.7482 |

|        |                                  |            |            |            |
|--------|----------------------------------|------------|------------|------------|
| sextet | $\alpha\alpha\alpha\beta\beta$   | -3365.7097 | -3365.6975 | -3365.7462 |
|        | $\alpha\alpha\beta\alpha\beta$   | -3365.7170 | -3365.7002 | -3365.7061 |
|        | $\alpha\beta\alpha\alpha\beta$   | -3365.7154 | -3365.6987 | -3365.7054 |
|        | $\beta\alpha\alpha\alpha\beta$   | -3365.7165 | -3365.6992 | -3365.7069 |
| octet  | $\alpha\alpha\alpha\beta\alpha$  | -3365.7176 | -3365.7007 | -3365.7102 |
|        | $\alpha\alpha\beta\alpha\alpha$  | -3365.7103 | -3365.6982 | -3365.7525 |
|        | $\alpha\beta\alpha\alpha\alpha$  | -3365.7096 | -3365.6962 | -3365.7492 |
|        | $\beta\alpha\alpha\alpha\alpha$  | -3365.7092 | -3365.6958 | -3365.7429 |
| 12-et  | $\alpha\alpha\alpha\alpha\beta$  | -3365.7173 | -3365.7001 | -3365.7053 |
| 14-et  | $\alpha\alpha\alpha\alpha\alpha$ | -3365.7098 | -3365.6964 | -3365.7473 |

| Spin state | Spin topology<br>(Mn1~Mn4-O8)    | Relative Gibbs Free energy (kcal/mol) |                            |                        |                        |
|------------|----------------------------------|---------------------------------------|----------------------------|------------------------|------------------------|
|            |                                  | $\Delta G^\ddagger(\text{Rea-TS})$    | $\Delta G(\text{Rea-Pro})$ |                        | $\Delta G(\text{Pro})$ |
|            |                                  |                                       | $\Delta G(\text{Rea})$     | $\Delta G(\text{Pro})$ |                        |
| doublet    | $\alpha\alpha\beta\beta\alpha$   | 10.1                                  | 5.4                        | 1.6                    | 28.9                   |
|            | $\alpha\beta\alpha\beta\alpha$   | 9.5                                   | 6.0                        | 1.6                    | 29.5                   |
|            | $\alpha\beta\beta\alpha\alpha$   | 7.3                                   | -23.5                      | 5.4                    | 3.8                    |
|            | $\beta\alpha\alpha\beta\alpha$   | 10.0                                  | 4.5                        | 1.1                    | 27.5                   |
|            | $\beta\alpha\beta\alpha\alpha$   | 7.8                                   | -23.2                      | 5.7                    | 4.5                    |
|            | $\beta\beta\alpha\alpha\alpha$   | 8.3                                   | -25.0                      | 5.8                    | 2.7                    |
| sextet     | $\alpha\alpha\alpha\beta\beta$   | 7.7                                   | -22.9                      | 5.0                    | 4.0                    |
|            | $\alpha\alpha\beta\alpha\beta$   | 10.5                                  | 6.8                        | 0.4                    | 29.1                   |
|            | $\alpha\beta\alpha\alpha\beta$   | 10.5                                  | 6.3                        | 1.4                    | 29.6                   |
|            | $\beta\alpha\alpha\alpha\beta$   | 10.9                                  | 6.0                        | 0.7                    | 28.6                   |
| octet      | $\alpha\alpha\alpha\beta\alpha$  | 10.6                                  | 4.6                        | 0.0                    | 26.5                   |
|            | $\alpha\alpha\beta\alpha\alpha$  | 7.6                                   | -26.5                      | 4.6                    | 0.0                    |
|            | $\alpha\beta\alpha\alpha\alpha$  | 8.4                                   | -24.8                      | 5.0                    | 2.1                    |
|            | $\beta\alpha\alpha\alpha\alpha$  | 8.4                                   | -21.1                      | 5.3                    | 6.0                    |
| 12-et      | $\alpha\alpha\alpha\alpha\beta$  | 10.8                                  | 7.5                        | 0.2                    | 29.6                   |
| 14-et      | $\alpha\alpha\alpha\alpha\alpha$ | 8.4                                   | -23.5                      | 4.9                    | 3.3                    |

| Spin state | Spin topology<br>(Mn1~Mn4-O8) | Mulliken spin density |       |       |  |
|------------|-------------------------------|-----------------------|-------|-------|--|
|            |                               | Rea                   | TS    | Pro   |  |
|            |                               |                       |       |       |  |
| doublet    | $\alpha$ Mn1                  | 2.95                  | 2.94  | 2.94  |  |
|            | $\alpha$ Mn2                  | 2.93                  | 2.93  | 2.95  |  |
|            | $\beta$ Mn3                   | -2.79                 | -2.80 | -2.79 |  |
|            | $\beta$ Mn4                   | -2.71                 | -2.28 | -1.96 |  |
|            | $\alpha$ O8                   | 0.54                  | 0.29  | 0.01  |  |
|            | $\alpha$ Mn1                  | 2.93                  | 2.93  | 2.92  |  |
|            | $\beta$ Mn2                   | -2.90                 | -2.90 | -2.92 |  |
|            | $\alpha$ Mn3                  | 2.78                  | 2.81  | 2.78  |  |
|            | $\beta$ Mn4                   | -2.67                 | -2.26 | -1.93 |  |
|            | $\alpha$ O8                   | 0.54                  | 0.28  | 0.01  |  |
|            | $\alpha$ Mn1                  | 2.92                  | 2.93  | 2.92  |  |

|        |          |     |       |       |       |
|--------|----------|-----|-------|-------|-------|
|        | $\beta$  | Mn2 | -2.92 | -2.92 | -2.92 |
|        | $\beta$  | Mn3 | -2.82 | -2.84 | -2.83 |
|        | $\alpha$ | Mn4 | 2.69  | 3.03  | 3.88  |
|        | $\alpha$ | O8  | 0.95  | 0.64  | 0.01  |
|        | $\beta$  | Mn1 | -2.93 | -2.94 | -2.94 |
|        | $\alpha$ | Mn2 | 2.92  | 2.92  | 2.93  |
|        | $\alpha$ | Mn3 | 2.83  | 2.85  | 2.82  |
|        | $\beta$  | Mn4 | -2.68 | -2.26 | -1.94 |
|        | $\alpha$ | O8  | 0.54  | 0.28  | 0.01  |
|        | $\beta$  | Mn1 | -2.93 | -2.93 | -2.92 |
|        | $\alpha$ | Mn2 | 2.91  | 2.90  | 2.92  |
|        | $\beta$  | Mn3 | -2.78 | -2.79 | -2.80 |
|        | $\alpha$ | Mn4 | 2.69  | 3.02  | 3.87  |
|        | $\alpha$ | O8  | 0.95  | 0.64  | 0.01  |
|        | $\beta$  | Mn1 | -2.94 | -2.95 | -2.95 |
|        | $\beta$  | Mn2 | -2.93 | -2.93 | -2.94 |
|        | $\alpha$ | Mn3 | 2.79  | 2.82  | 2.86  |
|        | $\alpha$ | Mn4 | 2.71  | 3.07  | 3.89  |
|        | $\alpha$ | O8  | 0.96  | 0.63  | 0.01  |
|        | $\alpha$ | Mn1 | 2.95  | 2.95  | 2.95  |
|        | $\alpha$ | Mn2 | 2.94  | 2.94  | 2.94  |
|        | $\alpha$ | Mn3 | 2.83  | 2.84  | 2.83  |
|        | $\beta$  | Mn4 | -2.69 | -3.02 | -3.88 |
|        | $\beta$  | O8  | -0.95 | -0.64 | -0.01 |
|        | $\alpha$ | Mn1 | 2.95  | 2.95  | 2.92  |
|        | $\alpha$ | Mn2 | 2.93  | 2.93  | 2.91  |
|        | $\beta$  | Mn3 | -2.78 | -2.81 | -2.81 |
|        | $\alpha$ | Mn4 | 2.68  | 2.27  | 1.95  |
| sextet | $\beta$  | O8  | -0.54 | -0.29 | 0.02  |
|        | $\alpha$ | Mn1 | 2.93  | 2.93  | 2.92  |
|        | $\beta$  | Mn2 | -2.90 | -2.90 | -2.93 |
|        | $\alpha$ | Mn3 | 2.79  | 2.80  | 2.79  |
|        | $\alpha$ | Mn4 | 2.71  | 2.28  | 1.97  |
|        | $\beta$  | O8  | -0.54 | -0.28 | -0.01 |
|        | $\beta$  | Mn1 | -2.92 | -2.92 | -2.92 |
|        | $\alpha$ | Mn2 | 2.92  | 2.92  | 2.92  |
|        | $\alpha$ | Mn3 | 2.83  | 2.84  | 2.83  |
|        | $\alpha$ | Mn4 | 2.71  | 2.28  | 1.96  |
|        | $\beta$  | O8  | -0.54 | -0.28 | 0.01  |
|        | $\alpha$ | Mn1 | 2.95  | 2.95  | 2.96  |
|        | $\alpha$ | Mn2 | 2.95  | 2.94  | 2.95  |
| octet  | $\alpha$ | Mn3 | 2.85  | 2.86  | 2.82  |
|        | $\beta$  | Mn4 | -2.68 | -2.27 | -1.94 |
|        | $\alpha$ | O8  | 0.46  | 0.29  | 0.01  |

|       |          |     |       |       |       |
|-------|----------|-----|-------|-------|-------|
|       | $\alpha$ | Mn1 | 2.94  | 2.95  | 2.96  |
|       | $\alpha$ | Mn2 | 2.93  | 2.93  | 2.95  |
|       | $\beta$  | Mn3 | -2.78 | -2.79 | -2.80 |
|       | $\alpha$ | Mn4 | 2.69  | 3.03  | 3.87  |
|       | $\alpha$ | O8  | 0.95  | 0.64  | 0.02  |
|       | $\alpha$ | Mn1 | 2.93  | 2.93  | 2.94  |
|       | $\beta$  | Mn2 | -2.91 | -2.91 | -2.92 |
|       | $\alpha$ | Mn3 | 2.79  | 2.82  | 2.86  |
|       | $\alpha$ | Mn4 | 2.72  | 3.08  | 3.89  |
|       | $\alpha$ | O8  | 0.96  | 0.62  | 0.01  |
|       | $\beta$  | Mn1 | -2.92 | -2.93 | -2.91 |
|       | $\alpha$ | Mn2 | 2.92  | 2.92  | 2.92  |
|       | $\alpha$ | Mn3 | 2.84  | 2.87  | 2.91  |
|       | $\alpha$ | Mn4 | 2.71  | 3.07  | 3.89  |
|       | $\alpha$ | O8  | 0.96  | 0.63  | 0.01  |
| 12-et | $\alpha$ | Mn1 | 2.96  | 2.95  | 2.95  |
|       | $\alpha$ | Mn2 | 2.95  | 2.94  | 2.94  |
|       | $\alpha$ | Mn3 | 2.84  | 2.85  | 2.83  |
|       | $\alpha$ | Mn4 | 2.71  | 2.29  | 1.96  |
|       | $\beta$  | O8  | -0.54 | -0.29 | 0.01  |
| 14-et | $\alpha$ | Mn1 | 2.95  | 2.95  | 2.96  |
|       | $\alpha$ | Mn2 | 2.94  | 2.94  | 2.95  |
|       | $\alpha$ | Mn3 | 2.84  | 2.87  | 2.90  |
|       | $\alpha$ | Mn4 | 2.72  | 3.08  | 3.89  |
|       | $\alpha$ | O8  | 0.96  | 0.63  | 0.01  |

**Rea:**

|    |             |             |             |   |             |             |             |
|----|-------------|-------------|-------------|---|-------------|-------------|-------------|
| Ca | -2.41000800 | 0.15637900  | -1.35647300 | H | 0.41125100  | 5.09158700  | 0.06276400  |
| Mn | -0.00651800 | -1.91052300 | -0.32153500 | O | -3.37985300 | 2.34771000  | -1.54884500 |
| Mn | -1.23638500 | -0.62224000 | 1.78093900  | C | -3.10533300 | 3.52540300  | -1.23588400 |
| Mn | 0.21113300  | 1.56379200  | 0.72185300  | O | -1.93078900 | 4.01710800  | -1.08776700 |
| Mn | -0.11966400 | 3.27126900  | -1.41526200 | C | -4.27544400 | 4.48443900  | -0.99333200 |
| O  | -1.65970000 | -1.54978800 | 0.27176500  | H | -4.90353600 | 4.43901200  | -1.89440900 |
| O  | 0.43173200  | -0.59972000 | 0.92299700  | H | -4.87849500 | 4.03833500  | -0.18933500 |
| O  | -1.48361800 | 1.03134000  | 1.18677600  | C | -3.90215700 | 5.92810100  | -0.65670300 |
| O  | -0.29784200 | 1.53275200  | -1.04429400 | H | -3.31989100 | 6.38504100  | -1.46706000 |
| O  | 0.07521900  | 3.26941200  | 0.64574700  | H | -3.29941600 | 5.97664200  | 0.25859800  |
| O  | -4.69041900 | -0.76233800 | -2.10653100 | H | -4.80441600 | 6.53637900  | -0.50237800 |
| H  | -4.95939600 | -0.77518700 | -1.16301100 | O | -0.64785500 | -3.36286000 | -1.47719700 |
| H  | -4.28433400 | -1.63741500 | -2.27970400 | C | -1.71571500 | -3.30275900 | -2.20188600 |
| O  | -2.03187900 | 1.34093000  | -3.56847800 | O | -2.49628800 | -2.33491200 | -2.30324100 |
| H  | -1.37357200 | 2.11227700  | -3.44767600 | C | -1.97305700 | -4.58502600 | -3.00350300 |
| O  | -0.30975800 | 3.34671000  | -3.06729600 | H | -1.14894200 | -4.67951200 | -3.72883200 |
| O  | 0.24938400  | 5.48220600  | -0.82753800 | H | -1.86127500 | -5.43824200 | -2.31853300 |
| H  | -0.72266500 | 5.60138500  | -0.83954500 | C | -3.32247100 | -4.62838700 | -3.72360100 |

|   |             |             |             |   |             |             |             |
|---|-------------|-------------|-------------|---|-------------|-------------|-------------|
| H | -3.41138500 | -3.74634600 | -4.37137000 | O | 2.17220500  | 1.63303000  | 0.15335500  |
| H | -4.13099900 | -4.54175800 | -2.98310400 | O | 1.87426500  | 3.14334100  | -1.51922400 |
| C | -3.51152100 | -5.90787400 | -4.54663500 | O | 0.31286000  | -3.36210400 | 1.05755600  |
| H | -2.73474500 | -6.00298200 | -5.31929500 | C | -0.24273300 | -3.37606800 | 2.20712200  |
| H | -3.45515600 | -6.80474500 | -3.91258400 | O | -0.90553500 | -2.44208500 | 2.72811900  |
| H | -4.48668900 | -5.91811700 | -5.05252300 | C | -0.07948900 | -4.67472900 | 2.99801500  |
| N | 2.02966700  | -2.24910400 | -0.79059700 | H | 0.97340400  | -4.97948200 | 2.91688000  |
| C | 2.64390300  | -1.94314000 | -1.98369700 | H | -0.65115200 | -5.44212900 | 2.45374800  |
| H | 2.04866500  | -1.66594200 | -2.84306000 | C | -0.52933200 | -4.59459200 | 4.45684500  |
| C | 4.00788000  | -2.01878900 | -1.83098700 | H | -0.40419300 | -5.56659900 | 4.95356900  |
| N | 4.20430200  | -2.39753800 | -0.50598200 | H | 0.05316600  | -3.84715300 | 5.00927400  |
| H | 5.09973800  | -2.33845700 | -0.01773700 | H | -1.58208500 | -4.29915600 | 4.52486800  |
| C | 2.98835900  | -2.50493900 | 0.08351900  | O | -4.15238200 | -0.26210500 | 0.50814400  |
| H | 2.82917200  | -2.73668200 | 1.12636000  | C | -4.12136800 | -0.56075400 | 1.72168800  |
| C | 5.11365500  | -1.77192700 | -2.82351500 | O | -3.06844100 | -0.72679700 | 2.44578600  |
| H | 5.14354800  | -2.58118900 | -3.56942500 | C | -5.42817300 | -0.78101300 | 2.47765500  |
| H | 4.86803200  | -0.86065200 | -3.38777400 | H | -6.28258800 | -0.47356800 | 1.86708700  |
| C | 6.53899300  | -1.64279800 | -2.23216200 | H | -5.41547700 | -0.21961600 | 3.41929200  |
| H | 6.88522100  | -2.61342000 | -1.85901700 | H | -5.52474300 | -1.84512200 | 2.73244000  |
| H | 7.22231600  | -1.33897300 | -3.03779800 | O | -0.55064000 | 0.07197100  | 3.52377300  |
| C | 6.62917400  | -0.67320700 | -1.05327400 | C | 0.33090900  | 0.98493300  | 3.60421800  |
| O | 6.66654900  | -1.08723800 | 0.11280800  | O | 0.85900100  | 1.60327800  | 2.63652100  |
| N | 6.62935300  | 0.65020900  | -1.36219000 | C | 0.77485500  | 1.39497200  | 5.00615700  |
| H | 6.49192000  | 0.90871400  | -2.33205500 | H | 1.78762900  | 1.81130000  | 4.92836600  |
| C | 6.43220600  | 1.68889400  | -0.34355700 | H | 0.11947500  | 2.22905900  | 5.30752100  |
| H | 7.01382200  | 1.38510300  | 0.53288700  | C | 0.70574700  | 0.27641000  | 6.05176800  |
| H | 6.86864000  | 2.61726600  | -0.73610300 | H | 1.36076900  | -0.55082300 | 5.73947300  |
| C | 4.95932000  | 1.88777500  | 0.04789800  | H | -0.31216400 | -0.13227200 | 6.06733200  |
| H | 4.56494400  | 0.94981100  | 0.45399200  | C | 1.10958800  | 0.75516000  | 7.45075000  |
| H | 4.91730100  | 2.62004700  | 0.86730300  | H | 2.13714400  | 1.14692300  | 7.46081800  |
| C | 4.07067400  | 2.35621100  | -1.10765600 | H | 1.05720400  | -0.06184900 | 8.18345600  |
| H | 4.17114500  | 1.67432800  | -1.96772700 | H | 0.44767600  | 1.56018400  | 7.80169700  |
| H | 4.35642700  | 3.35359700  | -1.46740800 | O | -0.06740700 | -0.86848500 | -1.80660200 |
| C | 2.57435800  | 2.38638900  | -0.78043500 | H | 0.27400900  | 0.04342900  | -1.61283400 |

**TS:**

|    |             |             |             |   |             |             |             |
|----|-------------|-------------|-------------|---|-------------|-------------|-------------|
| Ca | -2.43048700 | 0.15506800  | -1.28519900 | O | -0.11758700 | 3.22689800  | 0.59874600  |
| Mn | 0.10650700  | -1.92400600 | -0.37637200 | O | -4.62855800 | -0.83541700 | -2.12105600 |
| Mn | -1.14130500 | -0.73983800 | 1.78447400  | H | -4.91704000 | -0.90361700 | -1.18544500 |
| Mn | 0.18112000  | 1.52879600  | 0.75569700  | H | -4.18835500 | -1.68843800 | -2.32242100 |
| Mn | -0.43119300 | 3.16538700  | -1.37311700 | O | -1.68183800 | 1.44691800  | -3.46598600 |
| O  | -1.54732900 | -1.61002200 | 0.23620300  | H | -0.78533600 | 1.15327500  | -3.72082500 |
| O  | 0.51447400  | -0.62517400 | 0.90771500  | O | -0.74880300 | 3.15841100  | -3.04888100 |
| O  | -1.47271300 | 0.92134100  | 1.27195200  | O | -0.09301600 | 5.52812100  | -0.80772900 |
| O  | -0.36076500 | 1.40803900  | -0.96482900 | H | -1.07265700 | 5.52287200  | -0.76068700 |

|   |             |             |             |   |             |             |             |
|---|-------------|-------------|-------------|---|-------------|-------------|-------------|
| H | 0.16482200  | 5.10735700  | 0.04184200  | H | 6.93581400  | 1.86067800  | 0.43325000  |
| O | -3.62251500 | 2.22247000  | -1.10355600 | H | 6.69520200  | 3.02717600  | -0.88211900 |
| C | -3.40840300 | 3.44435500  | -0.98100300 | C | 4.84786300  | 2.20968300  | -0.03845900 |
| O | -2.25877500 | 4.01570900  | -0.99484700 | H | 4.52058900  | 1.26460200  | 0.40814000  |
| C | -4.62162400 | 4.36371900  | -0.79153200 | H | 4.77285300  | 2.96734400  | 0.75519300  |
| H | -5.28607700 | 4.17670000  | -1.64755800 | C | 3.91082900  | 2.57862700  | -1.19219200 |
| H | -5.16226500 | 3.98922900  | 0.08969200  | H | 4.04116000  | 1.87257600  | -2.02869400 |
| C | -4.31932600 | 5.85599000  | -0.65362600 | H | 4.12593700  | 3.57848600  | -1.59214200 |
| H | -3.79065800 | 6.23411700  | -1.53738300 | C | 2.41875200  | 2.52670800  | -0.83561000 |
| H | -3.68673000 | 6.05222100  | 0.22116800  | O | 2.09946600  | 1.77109600  | 0.13585400  |
| H | -5.24784400 | 6.43305400  | -0.53725800 | O | 1.65163100  | 3.21004500  | -1.57194300 |
| O | -0.52688600 | -3.35840200 | -1.55799800 | O | 0.47043700  | -3.40644400 | 0.96022700  |
| C | -1.59774300 | -3.28658900 | -2.27725200 | C | -0.06552900 | -3.46956100 | 2.11632600  |
| O | -2.38343900 | -2.32029700 | -2.35970400 | O | -0.74105000 | -2.56677500 | 2.67546800  |
| C | -1.85268800 | -4.55584500 | -3.10118400 | C | 0.13865500  | -4.78743500 | 2.86448800  |
| H | -1.02787700 | -4.63752800 | -3.82732600 | H | 1.19299600  | -5.07376400 | 2.74565300  |
| H | -1.73979700 | -5.41985700 | -2.43016600 | H | -0.43721900 | -5.54719200 | 2.31383100  |
| C | -3.20162400 | -4.59112500 | -3.82255900 | C | -0.27281300 | -4.75616400 | 4.33651200  |
| H | -3.29330900 | -3.69908000 | -4.45628400 | H | -0.12263000 | -5.74064500 | 4.80065700  |
| H | -4.01076500 | -4.51907900 | -3.08120300 | H | 0.31542500  | -4.01809700 | 4.89557700  |
| C | -3.38686100 | -5.85756600 | -4.66641300 | H | -1.32675700 | -4.47620500 | 4.44099100  |
| H | -2.60948600 | -5.93817200 | -5.44014400 | O | -4.10103500 | -0.53525200 | 0.54718900  |
| H | -3.32825100 | -6.76426400 | -4.04682000 | C | -4.03245600 | -0.83312200 | 1.75824500  |
| H | -4.36183400 | -5.86232400 | -5.17271000 | O | -2.95882200 | -0.94600500 | 2.46449000  |
| N | 2.16861500  | -2.18773200 | -0.82533700 | C | -5.31178300 | -1.10495000 | 2.54387400  |
| C | 2.78227400  | -1.88090600 | -2.01809700 | H | -6.19078400 | -0.97870000 | 1.90471500  |
| H | 2.18628600  | -1.67849100 | -2.89723000 | H | -5.37141500 | -0.41638500 | 3.39602700  |
| C | 4.14463400  | -1.84436900 | -1.84000400 | H | -5.28755700 | -2.12453700 | 2.94968100  |
| N | 4.34311600  | -2.15554600 | -0.49784900 | O | -0.42567000 | -0.05323700 | 3.53016500  |
| H | 5.22134200  | -2.00681000 | 0.00296100  | C | 0.37148900  | 0.93176500  | 3.61661300  |
| C | 3.12687300  | -2.33440100 | 0.07407000  | O | 0.83127300  | 1.61650300  | 2.65465600  |
| H | 2.96598500  | -2.53028100 | 1.12405600  | C | 0.80267200  | 1.35583200  | 5.01839400  |
| C | 5.24640100  | -1.54545900 | -2.82260400 | H | 1.80087500  | 1.80633300  | 4.93889000  |
| H | 5.34692800  | -2.37057100 | -3.54467400 | H | 0.12180000  | 2.17001600  | 5.31762200  |
| H | 4.94629800  | -0.66962300 | -3.41618600 | C | 0.77264300  | 0.23863900  | 6.06660100  |
| C | 6.64838300  | -1.29722300 | -2.21499500 | H | 1.45319900  | -0.56775400 | 5.75488000  |
| H | 7.05353100  | -2.22809800 | -1.80199600 | H | -0.23107100 | -0.20367000 | 6.08623700  |
| H | 7.32317000  | -0.97569600 | -3.02099900 | C | 1.16385900  | 0.73461500  | 7.46323800  |
| C | 6.65463700  | -0.28283400 | -1.07038900 | H | 2.17810100  | 1.15977300  | 7.46971700  |
| O | 6.69892200  | -0.65291100 | 0.11019200  | H | 1.13993700  | -0.08153700 | 8.19835300  |
| N | 6.57812900  | 1.02606000  | -1.42624100 | H | 0.47690500  | 1.51860500  | 7.81362000  |
| H | 6.44351000  | 1.24351500  | -2.40635000 | O | 0.04736700  | -0.88019200 | -1.85655800 |
| C | 6.32460500  | 2.08966100  | -0.44607300 | H | 0.29510000  | 0.04752000  | -1.59957300 |

**Pro:**

|    |             |             |             |   |             |             |             |
|----|-------------|-------------|-------------|---|-------------|-------------|-------------|
| Ca | 2.50264200  | -0.03167200 | -1.02126400 | H | -2.22222300 | 1.31132500  | -3.01788600 |
| Mn | -0.26238800 | 1.91594400  | -0.46596900 | C | -4.22857900 | 1.45329400  | -2.04975300 |
| Mn | 0.96396200  | 0.88641000  | 1.78678100  | N | -4.49838000 | 1.87680900  | -0.75157500 |
| Mn | -0.09798000 | -1.51906900 | 0.72410300  | H | -5.38486400 | 1.71888000  | -0.26829700 |
| Mn | 0.82547800  | -3.19993500 | -1.23389100 | C | -3.31869800 | 2.18375900  | -0.15838000 |
| O  | 1.37807200  | 1.76714700  | 0.24629700  | H | -3.21149600 | 2.49163600  | 0.87116400  |
| O  | -0.62352400 | 0.60974100  | 0.83765500  | C | -5.27195000 | 0.99503700  | -3.03452600 |
| O  | 1.48669000  | -0.72778500 | 1.28056000  | H | -5.39835900 | 1.74330400  | -3.83237200 |
| O  | 0.45088300  | -1.38888800 | -0.97282000 | H | -4.89485000 | 0.09134100  | -3.53502400 |
| O  | 0.44842000  | -3.18135200 | 0.62647700  | C | -6.67652000 | 0.70953500  | -2.44903800 |
| O  | 4.58674200  | 1.10662300  | -1.93016200 | H | -7.15654200 | 1.64505900  | -2.13979900 |
| H  | 4.86482300  | 1.27350700  | -1.00464300 | H | -7.29875000 | 0.26824700  | -3.24053900 |
| H  | 4.07928200  | 1.90310400  | -2.20011000 | C | -6.65739300 | -0.19143400 | -1.21305900 |
| O  | 1.69107000  | -1.58797300 | -3.32891200 | O | -6.77203800 | 0.28434800  | -0.07571900 |
| H  | 0.84897800  | -1.11204500 | -3.47287600 | N | -6.47850500 | -1.51861900 | -1.44101400 |
| O  | 1.18956600  | -2.93699500 | -3.05617300 | H | -6.28316700 | -1.81092700 | -2.39117100 |
| O  | 0.65209900  | -5.46833200 | -0.96059500 | C | -6.16751200 | -2.46433600 | -0.36154600 |
| H  | 1.61647400  | -5.46572600 | -0.76360100 | H | -6.78012800 | -2.17071800 | 0.49705800  |
| H  | 0.22594500  | -5.29341800 | -0.09689600 | H | -6.50046000 | -3.45742800 | -0.69319600 |
| O  | 3.81365600  | -2.01827700 | -0.94995700 | C | -4.68142500 | -2.47840700 | 0.03061200  |
| C  | 3.82629900  | -3.26736100 | -0.84364400 | H | -4.39129000 | -1.48214800 | 0.38203900  |
| O  | 2.79546800  | -4.02048500 | -0.88381000 | H | -4.56177700 | -3.15364200 | 0.89054200  |
| C  | 5.18946500  | -3.94307500 | -0.65279600 | C | -3.74287800 | -2.91226800 | -1.09909200 |
| H  | 5.82041100  | -3.62046800 | -1.49380300 | H | -3.90103500 | -2.27848500 | -1.98739500 |
| H  | 5.64179000  | -3.49326400 | 0.24313200  | H | -3.93849900 | -3.94561800 | -1.41698200 |
| C  | 5.16286000  | -5.46783500 | -0.54392900 | C | -2.24208200 | -2.80108600 | -0.77511000 |
| H  | 4.72454500  | -5.91872400 | -1.44283100 | O | -1.95158000 | -1.96558500 | 0.15512700  |
| H  | 4.55989400  | -5.79091800 | 0.31381900  | O | -1.45598200 | -3.49182900 | -1.45960700 |
| H  | 6.17847600  | -5.86979900 | -0.41827600 | O | -0.80929900 | 3.39788300  | 0.81811700  |
| O  | 0.32510800  | 3.36212500  | -1.65117100 | C | -0.35376300 | 3.51844200  | 2.00339900  |
| C  | 1.43538600  | 3.34164000  | -2.31285500 | O | 0.34922400  | 2.67764200  | 2.62259700  |
| O  | 2.28438100  | 2.42757300  | -2.32734300 | C | -0.70012200 | 4.82928500  | 2.71121300  |
| C  | 1.64950500  | 4.60463700  | -3.15853600 | H | -1.76105600 | 5.03944500  | 2.51624900  |
| H  | 0.85383800  | 4.61970700  | -3.92060400 | H | -0.14159200 | 5.61982000  | 2.18653400  |
| H  | 1.45624600  | 5.47544600  | -2.51510800 | C | -0.38943000 | 4.84845100  | 4.20799100  |
| C  | 3.02451300  | 4.70555400  | -3.82208800 | H | -0.63846100 | 5.82668200  | 4.64194900  |
| H  | 3.19707500  | 3.80716100  | -4.42957300 | H | -0.96257200 | 4.07933600  | 4.74030900  |
| H  | 3.80292100  | 4.69835400  | -3.04526300 | H | 0.67159100  | 4.64427400  | 4.38855200  |
| C  | 3.17162300  | 5.96214400  | -4.68791100 | O | 4.03043900  | 0.90521200  | 0.75465100  |
| H  | 2.42568200  | 5.97910500  | -5.49583700 | C | 3.84546200  | 1.25260400  | 1.94272400  |
| H  | 3.03212500  | 6.87684900  | -4.09355200 | O | 2.72129800  | 1.28317300  | 2.56842700  |
| H  | 4.16602100  | 6.01473500  | -5.15204900 | C | 5.03300100  | 1.71425900  | 2.78205400  |
| N  | -2.31786900 | 2.01257000  | -1.00595500 | H | 5.97424700  | 1.50562400  | 2.26447600  |
| C  | -2.86474500 | 1.55729600  | -2.18390200 | H | 5.01948100  | 1.21489100  | 3.75788800  |



|   |             |             |            |   |             |             |             |
|---|-------------|-------------|------------|---|-------------|-------------|-------------|
| H | 4.94865700  | 2.79408600  | 2.96539200 | H | -1.83692500 | 0.41592100  | 5.62907300  |
| O | 0.26773100  | 0.15308800  | 3.51055300 | H | -0.12753000 | 0.38881900  | 6.02903700  |
| C | -0.40548000 | -0.92275900 | 3.59436600 | C | -1.37577000 | -0.74460300 | 7.40021100  |
| O | -0.75731400 | -1.66638100 | 2.63413700 | H | -2.29158500 | -1.35347200 | 7.39238200  |
| C | -0.80731200 | -1.37494300 | 4.99643000 | H | -1.53479000 | 0.08749800  | 8.09986700  |
| H | -1.69972800 | -2.00713300 | 4.90238500 | H | -0.56818700 | -1.37117300 | 7.80591800  |
| H | 0.00285900  | -2.03207300 | 5.35407900 | O | -0.06108200 | 0.84304700  | -1.90528000 |
| C | -1.02934400 | -0.23493100 | 5.99673700 | H | -0.21276200 | -0.09976400 | -1.60649700 |

**Table S31** Reaction parameters for the open-cubane W3 (hydroxyl)-O5 (oxo) nucleophilic attack:

| Spin state | Spin topology<br>(Mn1~Mn4-O8)    | Gibbs Free energy (a.u.) |            |            |
|------------|----------------------------------|--------------------------|------------|------------|
|            |                                  | Rea                      | TS         | Pro        |
| doublet    | $\alpha\alpha\beta\alpha$        | -3365.7323               | -3365.7008 | -3365.7070 |
|            | $\alpha\beta\alpha\beta$         | -3365.7250               | -3365.7130 | -3365.7313 |
|            | $\alpha\beta\beta\alpha\alpha$   | -3365.7303               | -3365.7005 | -3365.7077 |
|            | $\beta\alpha\alpha\beta\alpha$   | -3365.7253               | -3365.7120 | -3365.7292 |
|            | $\beta\alpha\beta\alpha\alpha$   | -3365.7325               | -3365.7004 | -3365.7076 |
|            | $\beta\beta\alpha\alpha\alpha$   | -3365.7220               | -3365.7120 | -3365.7310 |
| sextet     | $\alpha\alpha\alpha\beta\beta$   | -3365.7340               | -3365.7015 | -3365.7079 |
|            | $\alpha\alpha\beta\alpha\beta$   | -3365.7326               | -3365.7176 | -3365.7399 |
|            | $\alpha\beta\alpha\alpha\beta$   | -3365.7335               | -3365.7025 | -3365.7216 |
|            | $\beta\alpha\alpha\alpha\beta$   | -3365.7337               | -3365.7019 | -3365.7071 |
| octet      | $\alpha\alpha\alpha\beta\alpha$  | -3365.7406               | -3365.7246 | -3365.7451 |
|            | $\alpha\alpha\beta\alpha\alpha$  | -3365.7338               | -3365.7015 | -3365.7095 |
|            | $\alpha\beta\alpha\alpha\alpha$  | -3365.7399               | -3365.7252 | -3365.7474 |
|            | $\beta\alpha\alpha\alpha\alpha$  | -3365.7402               | -3365.7240 | -3365.7456 |
| 12-et      | $\alpha\alpha\alpha\alpha\beta$  | -3365.7344               | -3365.7030 | -3365.7082 |
| 14-et      | $\alpha\alpha\alpha\alpha\alpha$ | -3365.7412               | -3365.7251 | -3365.7463 |

  

| Spin state | Spin topology<br>(Mn1~Mn4-O8)   | Relative Gibbs Free energy (kcal/mol) |                            |                        |                        |
|------------|---------------------------------|---------------------------------------|----------------------------|------------------------|------------------------|
|            |                                 | $\Delta G^\ddagger(\text{Rea-TS})$    | $\Delta G(\text{Rea-Pro})$ | $\Delta G(\text{Rea})$ | $\Delta G(\text{Pro})$ |
| doublet    | $\alpha\alpha\beta\beta\alpha$  | 19.8                                  | 15.9                       | 5.6                    | 25.4                   |
|            | $\alpha\beta\alpha\beta\alpha$  | 7.5                                   | -4.0                       | 10.2                   | 10.1                   |
|            | $\alpha\beta\beta\alpha\alpha$  | 18.7                                  | 14.2                       | 6.8                    | 24.9                   |
|            | $\beta\alpha\alpha\beta\alpha$  | 8.3                                   | -2.4                       | 10.0                   | 11.4                   |
|            | $\beta\alpha\beta\alpha\alpha$  | 20.1                                  | 15.6                       | 5.5                    | 25.0                   |
|            | $\beta\beta\alpha\alpha\alpha$  | 6.3                                   | -5.6                       | 12.0                   | 10.3                   |
| sextet     | $\alpha\alpha\alpha\beta\beta$  | 20.4                                  | 16.4                       | 4.5                    | 24.8                   |
|            | $\alpha\alpha\beta\alpha\beta$  | 9.4                                   | -4.6                       | 5.4                    | 4.7                    |
|            | $\alpha\beta\alpha\alpha\beta$  | 19.5                                  | 7.5                        | 4.8                    | 16.2                   |
|            | $\beta\alpha\alpha\alpha\beta$  | 20.0                                  | 16.7                       | 4.7                    | 25.3                   |
| octet      | $\alpha\alpha\alpha\beta\alpha$ | 10.0                                  | -2.8                       | 0.4                    | 1.4                    |

|       |                            |      |      |     |      |
|-------|----------------------------|------|------|-----|------|
|       | $\alpha\alpha\beta\alpha$  | 20.3 | 15.2 | 4.6 | 23.8 |
|       | $\alpha\beta\alpha\alpha$  | 9.2  | -4.7 | 0.8 | 0.0  |
|       | $\beta\alpha\alpha\alpha$  | 10.2 | -3.4 | 0.6 | 1.1  |
| 12-et | $\alpha\alpha\alpha\beta$  | 19.7 | 16.4 | 4.3 | 24.6 |
| 14-et | $\alpha\alpha\alpha\alpha$ | 10.1 | -3.2 | 0.0 | 0.7  |

| Spin state | Spin topology<br>(Mn1~Mn4-O8) |       | Mulliken spin density |       |       |
|------------|-------------------------------|-------|-----------------------|-------|-------|
|            |                               |       | Rea                   | TS    | Pro   |
| doublet    | $\alpha$                      | Mn1   | 2.94                  | 2.95  | 2.97  |
|            | $\alpha$                      | Mn2   | 2.94                  | 2.95  | 2.94  |
|            | $\beta$                       | Mn3   | -2.85                 | -2.50 | -1.98 |
|            | $\beta$                       | Mn4   | -2.92                 | -2.85 | -2.85 |
|            | $\alpha$                      | O8    | 0.96                  | 0.45  | 0.00  |
|            | $\alpha$                      | Mn1   | 2.93                  | 2.94  | 2.94  |
|            | $\beta$                       | Mn2   | -2.91                 | -2.90 | -2.88 |
|            | $\alpha$                      | Mn3   | 2.85                  | 3.39  | 3.80  |
|            | $\beta$                       | Mn4   | -2.82                 | -2.79 | -2.78 |
|            | $\alpha$                      | O8    | 0.78                  | 0.47  | 0.01  |
|            | $\alpha$                      | Mn1   | 2.93                  | 2.94  | 2.97  |
|            | $\beta$                       | Mn2   | -2.93                 | -2.92 | -2.93 |
|            | $\beta$                       | Mn3   | -2.87                 | -2.47 | -2.01 |
|            | $\alpha$                      | Mn4   | 2.85                  | 2.88  | 2.86  |
|            | $\alpha$                      | O8    | 0.95                  | 0.46  | 0.01  |
|            | $\beta$                       | Mn1   | -2.93                 | -2.93 | -2.93 |
|            | $\alpha$                      | Mn2   | 2.93                  | 2.94  | 2.94  |
|            | $\alpha$                      | Mn3   | 2.89                  | 3.44  | 3.83  |
|            | $\beta$                       | Mn4   | -2.82                 | -2.78 | -2.78 |
|            | $\alpha$                      | O8    | 0.79                  | 0.45  | 0.02  |
| $\beta$    | Mn1                           | -2.94 | -2.94                 | -2.94 |       |
| $\alpha$   | Mn2                           | 2.91  | 2.93                  | 2.94  |       |
| $\beta$    | Mn3                           | -2.84 | -2.45                 | -1.97 |       |
| $\alpha$   | Mn4                           | 2.85  | 2.88                  | 2.85  |       |
| $\alpha$   | O8                            | 0.95  | 0.46                  | 0.01  |       |
| $\beta$    | Mn1                           | -2.94 | -2.94                 | -2.94 |       |
| $\beta$    | Mn2                           | -2.94 | -2.92                 | -2.90 |       |
| $\alpha$   | Mn3                           | 2.85  | 3.37                  | 3.82  |       |
| $\alpha$   | Mn4                           | 2.88  | 2.88                  | 2.88  |       |
| $\alpha$   | O8                            | 0.79  | 0.49                  | 0.02  |       |
| sextet     | $\alpha$                      | Mn1   | 2.96                  | 2.96  | 2.96  |
|            | $\alpha$                      | Mn2   | 2.95                  | 2.94  | 2.92  |
|            | $\alpha$                      | Mn3   | 2.87                  | 2.47  | 1.99  |
|            | $\beta$                       | Mn4   | -2.85                 | -2.88 | -2.83 |
|            | $\beta$                       | O8    | -0.95                 | -0.45 | -0.02 |
|            | $\alpha$                      | Mn1   | 2.95                  | 2.94  | 2.94  |

|       |          |     |       |       |       |
|-------|----------|-----|-------|-------|-------|
|       | $\alpha$ | Mn2 | 2.94  | 2.93  | 2.90  |
|       | $\beta$  | Mn3 | -2.84 | -3.33 | -3.81 |
|       | $\alpha$ | Mn4 | 2.85  | 2.81  | 2.78  |
|       | $\beta$  | O8  | -0.94 | -0.58 | -0.01 |
|       | $\alpha$ | Mn1 | 2.94  | 2.94  | 2.86  |
|       | $\beta$  | Mn2 | -2.91 | -2.94 | -3.82 |
|       | $\alpha$ | Mn3 | 2.85  | 2.51  | 2.79  |
|       | $\alpha$ | Mn4 | 2.92  | 2.85  | 2.86  |
|       | $\beta$  | O8  | -0.96 | -0.46 | 0.00  |
|       | $\beta$  | Mn1 | 2.93  | -2.94 | -2.94 |
|       | $\alpha$ | Mn2 | 2.93  | 2.92  | 2.91  |
|       | $\alpha$ | Mn3 | 2.88  | 2.52  | 2.00  |
|       | $\alpha$ | Mn4 | 2.92  | 2.85  | 2.87  |
|       | $\beta$  | O8  | -0.96 | -0.45 | 0.00  |
|       | $\alpha$ | Mn1 | 2.96  | 2.96  | 2.95  |
|       | $\alpha$ | Mn2 | 2.95  | 2.96  | 2.96  |
|       | $\alpha$ | Mn3 | 2.89  | 3.42  | 3.85  |
|       | $\beta$  | Mn4 | -2.87 | -2.82 | -2.79 |
|       | $\alpha$ | O8  | 0.94  | 0.54  | 0.01  |
| octet | $\alpha$ | Mn1 | 2.95  | 2.95  | 2.97  |
|       | $\alpha$ | Mn2 | 2.94  | 2.95  | 2.94  |
|       | $\beta$  | Mn3 | -2.84 | -2.45 | -1.98 |
|       | $\alpha$ | Mn4 | 2.85  | 2.88  | 2.87  |
|       | $\alpha$ | O8  | 0.95  | 0.46  | 0.01  |
|       | $\alpha$ | Mn1 | 2.94  | 2.94  | 2.93  |
|       | $\beta$  | Mn2 | -2.92 | -2.90 | -2.88 |
|       | $\alpha$ | Mn3 | 2.86  | 3.37  | 3.86  |
|       | $\alpha$ | Mn4 | 2.92  | 2.92  | 2.89  |
|       | $\alpha$ | O8  | 0.95  | 0.57  | 0.02  |
|       | $\beta$  | Mn1 | -2.93 | -2.93 | -2.92 |
|       | $\alpha$ | Mn2 | 2.93  | 2.94  | 2.95  |
|       | $\alpha$ | Mn3 | 2.89  | 3.43  | 3.88  |
|       | $\alpha$ | Mn4 | 2.92  | 2.92  | 2.88  |
|       | $\alpha$ | O8  | 0.95  | 0.56  | 0.02  |
| 12-et | $\alpha$ | Mn1 | 2.96  | 2.96  | 2.96  |
|       | $\alpha$ | Mn2 | 2.95  | 2.94  | 2.91  |
|       | $\alpha$ | Mn3 | 2.88  | 2.52  | 2.01  |
|       | $\alpha$ | Mn4 | 2.92  | 2.85  | 2.88  |
|       | $\beta$  | O8  | -0.96 | -0.45 | 0.00  |
| 14-et | $\alpha$ | Mn1 | 2.96  | 2.96  | 2.94  |
|       | $\alpha$ | Mn2 | 2.95  | 2.96  | 2.96  |
|       | $\alpha$ | Mn3 | 2.90  | 3.44  | 3.89  |
|       | $\alpha$ | Mn4 | 2.92  | 2.92  | 2.88  |
|       | $\beta$  | O8  | 0.95  | 0.56  | 0.02  |

**Rea:**

|    |             |             |             |   |             |             |             |
|----|-------------|-------------|-------------|---|-------------|-------------|-------------|
| Ca | 2.22385400  | 0.45241200  | -1.43623400 | C | -3.03758500 | 1.29715700  | -1.45237200 |
| Mn | -0.42968000 | 1.93480100  | 0.14828900  | H | -2.40361400 | 1.22076100  | -2.32532900 |
| Mn | 1.38223900  | 0.65995500  | 1.77603600  | C | -4.38157000 | 1.05307200  | -1.29740500 |
| Mn | 0.37543100  | -1.62211000 | 0.37198500  | N | -4.63950100 | 1.28187700  | 0.05140700  |
| Mn | 0.98196900  | -3.19911600 | -1.78655600 | H | -5.48314500 | 0.96698800  | 0.53301600  |
| O  | 1.31513600  | 2.00412800  | 0.51945000  | C | -3.47065800 | 1.62126600  | 0.64967400  |
| O  | -0.31442200 | 0.31781800  | 1.01412500  | H | -3.35082300 | 1.82233600  | 1.70423300  |
| O  | 1.94446800  | -0.70995100 | 0.79151800  | C | -5.42709000 | 0.66775600  | -2.31058200 |
| O  | 0.66741700  | -1.35805500 | -1.34057100 | H | -5.67451400 | 1.53008100  | -2.94904900 |
| O  | 0.94279200  | -3.25756500 | 0.06351200  | H | -4.98885500 | -0.08180300 | -2.98496800 |
| O  | 2.98906100  | 2.72041800  | -2.08041000 | C | -6.75932100 | 0.12835000  | -1.73276600 |
| H  | 3.36047700  | 2.89298900  | -1.19350100 | H | -7.31906800 | 0.93577700  | -1.24706700 |
| H  | 2.19765700  | 3.30189400  | -2.16982500 | H | -7.37520200 | -0.24319100 | -2.56393900 |
| O  | 1.95754800  | -0.29697800 | -3.84271200 | C | -6.55732400 | -0.95734700 | -0.67656600 |
| H  | 1.58567600  | -1.24819700 | -3.78113600 | O | -6.64306300 | -0.70039600 | 0.53073700  |
| O  | 0.97977400  | -2.79505600 | -3.62247700 | N | -6.23599200 | -2.19195700 | -1.14728500 |
| O  | 1.00260400  | -5.01332200 | -1.89680900 | H | -6.08447500 | -2.28619500 | -2.14466200 |
| H  | 0.03360900  | -2.76579100 | -3.85554700 | C | -5.68433700 | -3.24007500 | -0.28087400 |
| H  | 1.09831200  | -5.29743000 | -0.96707600 | H | -6.24295900 | -3.19994100 | 0.65971300  |
| O  | 3.76051400  | -1.17763500 | -2.24584000 | H | -5.89526400 | -4.20529900 | -0.76074100 |
| C  | 3.86314000  | -2.41126100 | -2.05411900 | C | -4.18058600 | -3.07294500 | -0.00826000 |
| O  | 2.92470600  | -3.25036300 | -1.82482500 | H | -4.01105500 | -2.13172700 | 0.52636600  |
| C  | 5.25236000  | -3.06018000 | -2.08840400 | H | -3.86353800 | -3.87676200 | 0.67165200  |
| H  | 5.35158900  | -3.66381300 | -1.17578900 | C | -3.31924500 | -3.10057300 | -1.27491100 |
| H  | 5.24424100  | -3.77952100 | -2.92076700 | H | -3.64489200 | -2.31133800 | -1.97165300 |
| C  | 6.40429700  | -2.06582800 | -2.22908300 | H | -3.41120300 | -4.05475900 | -1.81055200 |
| H  | 6.41740200  | -1.35814200 | -1.39139600 | C | -1.82925900 | -2.84798400 | -1.02438100 |
| H  | 6.30510900  | -1.47799900 | -3.14888800 | O | -1.52678600 | -2.18578900 | 0.01057900  |
| H  | 7.36903800  | -2.59207400 | -2.25358500 | O | -1.04481900 | -3.31873800 | -1.90242900 |
| O  | -0.60605100 | 3.85981800  | -0.39187400 | O | -1.06333600 | 2.73879800  | 1.90477600  |
| C  | -0.09755900 | 4.50617700  | -1.37710300 | C | -0.35689900 | 2.72116200  | 2.96774800  |
| O  | 0.52039600  | 3.99837700  | -2.34626800 | O | 0.69032200  | 2.04926600  | 3.15426900  |
| C  | -0.28520800 | 6.02378400  | -1.30516600 | C | -0.84347400 | 3.62975600  | 4.09704300  |
| H  | -1.29404300 | 6.22214000  | -0.91706000 | H | -1.93401200 | 3.51301600  | 4.16696600  |
| H  | 0.40777700  | 6.39134200  | -0.53015800 | H | -0.67729600 | 4.66356700  | 3.75669700  |
| C  | -0.03862100 | 6.75664200  | -2.62662700 | C | -0.16623200 | 3.38642500  | 5.44588200  |
| H  | -0.74390600 | 6.38411400  | -3.38376600 | H | -0.54704100 | 4.08750900  | 6.20121500  |
| H  | 0.96098500  | 6.49618900  | -2.99722100 | H | -0.34880800 | 2.36451900  | 5.80014700  |
| C  | -0.17592600 | 8.27734000  | -2.49204800 | H | 0.91898000  | 3.51233500  | 5.36582400  |
| H  | -1.18119100 | 8.56103800  | -2.14795000 | O | 4.02852400  | 1.33033300  | 0.14380000  |
| H  | 0.54498500  | 8.67992700  | -1.76577100 | C | 4.13261700  | 1.37529000  | 1.38780200  |
| H  | 0.00220100  | 8.78159500  | -3.45167100 | O | 3.19791300  | 1.15150200  | 2.25171700  |
| N  | -2.49307100 | 1.65474500  | -0.23982700 | C | 5.48538600  | 1.69339600  | 2.01580400  |

|   |             |             |            |   |             |             |             |
|---|-------------|-------------|------------|---|-------------|-------------|-------------|
| H | 5.36246500  | 2.29653500  | 2.92198600 | C | -0.24448800 | -3.67745700 | 4.65988600  |
| H | 6.12801000  | 2.20597700  | 1.29318000 | H | 0.25155400  | -4.33112000 | 3.93025300  |
| H | 5.96758300  | 0.74932900  | 2.30510900 | H | -1.26651000 | -3.53279300 | 4.28394600  |
| O | 1.19448600  | -0.50329200 | 3.35894000 | C | -0.28109000 | -4.35279000 | 6.03573300  |
| C | 0.56155300  | -1.61285800 | 3.34502900 | H | 0.73342700  | -4.53781200 | 6.41766600  |
| O | 0.01549800  | -2.14049700 | 2.34329100 | H | -0.80099400 | -5.31959300 | 5.99201000  |
| C | 0.47567200  | -2.32734600 | 4.69231200 | H | -0.80156000 | -3.72779300 | 6.77637400  |
| H | 1.50690900  | -2.44125000 | 5.05948000 | O | -0.09746900 | 1.43264000  | -1.58741200 |
| H | -0.01268300 | -1.63669200 | 5.39722400 | H | 0.04955400  | 2.29269400  | -2.06140800 |

**TS:**

|    |             |             |             |   |             |            |             |
|----|-------------|-------------|-------------|---|-------------|------------|-------------|
| Ca | 1.41410600  | -1.70568700 | -1.46906900 | H | 5.90856600  | 2.61524600 | -0.59785200 |
| Mn | 1.57256100  | 1.39281700  | 0.07508400  | C | 6.09233900  | 3.08524500 | -2.71285100 |
| Mn | 1.35851900  | -0.78367300 | 1.72202100  | H | 5.46732600  | 3.52260600 | -3.50506700 |
| Mn | -1.17319000 | -1.02177800 | 0.40339800  | H | 6.30272500  | 2.05672700 | -3.03296400 |
| Mn | -2.51380300 | -2.68147200 | -1.48022200 | C | 7.39755500  | 3.87844100 | -2.58335100 |
| O  | 2.49211800  | -0.08384300 | 0.46789600  | H | 7.20624900  | 4.92089500 | -2.28996300 |
| O  | 0.20895400  | 0.51479000  | 0.95272000  | H | 8.05694100  | 3.43907700 | -1.82082800 |
| O  | 0.41514800  | -1.93513900 | 0.76105500  | H | 7.95151800  | 3.89582600 | -3.53194900 |
| O  | -0.94269500 | -1.47507300 | -1.35242400 | N | 0.29479000  | 3.01508100 | -0.38170000 |
| O  | -2.30858000 | -2.42012300 | 0.28997600  | C | -0.37787600 | 3.15517500 | -1.57552600 |
| O  | 3.69929600  | -1.38976200 | -2.34571900 | H | -0.19003600 | 2.45732800 | -2.38111100 |
| H  | 4.08479000  | -1.73247300 | -1.51316600 | C | -1.26143100 | 4.20302900 | -1.47997700 |
| H  | 3.90058200  | -0.42286800 | -2.36339400 | N | -1.10165400 | 4.70149000 | -0.18929300 |
| O  | -0.58620600 | -0.71590900 | -2.85629700 | H | -1.77683700 | 5.31347500 | 0.27085500  |
| H  | -1.22825700 | -1.35804400 | -3.29648200 | C | -0.17101300 | 3.94061800 | 0.43986200  |
| O  | -2.46516300 | -2.52906000 | -3.37505700 | H | 0.13459200  | 4.06098600 | 1.46927800  |
| O  | -4.01855500 | -3.65330500 | -1.29014300 | C | -2.18929700 | 4.78842800 | -2.51098300 |
| H  | -3.26743000 | -2.01921100 | -3.58974400 | H | -1.61498700 | 5.35672500 | -3.25926300 |
| H  | -4.11243700 | -3.72476600 | -0.31987100 | H | -2.65237200 | 3.95826300 | -3.06304900 |
| O  | 0.63910100  | -3.78396700 | -2.30620900 | C | -3.29227800 | 5.73109200 | -1.96993100 |
| C  | -0.28751100 | -4.57582600 | -2.02636500 | H | -2.84935100 | 6.66228200 | -1.59812400 |
| O  | -1.46309700 | -4.30090400 | -1.58702600 | H | -3.96289100 | 5.99602400 | -2.79964000 |
| C  | -0.06960100 | -6.08306600 | -2.21373700 | C | -4.07709500 | 5.12478900 | -0.80824200 |
| H  | -0.47654900 | -6.58951800 | -1.32850300 | O | -3.82181400 | 5.42405900 | 0.36452400  |
| H  | -0.71253900 | -6.38926500 | -3.05310100 | N | -5.03154000 | 4.21681900 | -1.14985900 |
| C  | 1.38494300  | -6.47836500 | -2.46700000 | H | -5.09607100 | 3.95613100 | -2.12681400 |
| H  | 2.02491000  | -6.18594200 | -1.62510500 | C | -5.63161800 | 3.30489300 | -0.17028700 |
| H  | 1.77667200  | -5.98008700 | -3.36115300 | H | -5.77471600 | 3.88164800 | 0.74901300  |
| H  | 1.47394900  | -7.56513800 | -2.60596400 | H | -6.62198300 | 3.01837600 | -0.54982500 |
| O  | 3.18170800  | 2.44291600  | -0.51791200 | C | -4.76416200 | 2.06823000 | 0.11393700  |
| C  | 4.01074000  | 2.21498800  | -1.47006600 | H | -3.80010100 | 2.39010600 | 0.52310200  |
| O  | 3.84724600  | 1.39252100  | -2.40700000 | H | -5.25468900 | 1.47672500 | 0.90082600  |
| C  | 5.29488200  | 3.04589200  | -1.40650900 | C | -4.51935700 | 1.18473200 | -1.11470400 |
| H  | 5.02754500  | 4.05672100  | -1.06828000 | H | -4.09380200 | 1.78580300 | -1.93486600 |

|   |             |             |             |   |             |             |             |
|---|-------------|-------------|-------------|---|-------------|-------------|-------------|
| H | -5.44957200 | 0.74158300  | -1.49315900 | H | 5.07126500  | -4.09713700 | 1.09346700  |
| C | -3.51757300 | 0.05156100  | -0.87069700 | H | 3.78254800  | -4.73187000 | 2.14363000  |
| O | -2.61644900 | 0.27569400  | -0.00775000 | O | 0.28893900  | -1.19557900 | 3.33214900  |
| O | -3.67461000 | -0.98624600 | -1.57731000 | C | -0.98676600 | -1.17063700 | 3.34380700  |
| O | 1.96312000  | 2.38188100  | 1.80319700  | O | -1.73439000 | -0.96228700 | 2.35395400  |
| C | 2.29266300  | 1.77571200  | 2.87808200  | C | -1.63322300 | -1.41564200 | 4.70534600  |
| O | 2.22676700  | 0.53646400  | 3.08429000  | H | -1.28295800 | -2.40173300 | 5.04744200  |
| C | 2.83160300  | 2.66844800  | 3.99654900  | H | -1.20067800 | -0.68861500 | 5.40946500  |
| H | 2.15846000  | 3.53369200  | 4.07805500  | C | -3.16233000 | -1.35075500 | 4.71541400  |
| H | 3.79091000  | 3.07257700  | 3.63841200  | H | -3.55561600 | -2.06798200 | 3.98327500  |
| C | 3.00434800  | 1.96723100  | 5.34385500  | H | -3.48447300 | -0.35993400 | 4.36617400  |
| H | 3.41024500  | 2.66219300  | 6.09186900  | C | -3.74943200 | -1.63384400 | 6.10310700  |
| H | 2.04619900  | 1.58223800  | 5.71330100  | H | -3.46724000 | -2.63515500 | 6.45962000  |
| H | 3.68374800  | 1.11238900  | 5.25491700  | H | -4.84681800 | -1.58299800 | 6.09021100  |
| O | 3.16330900  | -2.78929100 | 0.01872000  | H | -3.39094300 | -0.90740100 | 6.84730100  |
| C | 3.32284900  | -2.83231000 | 1.26074700  | O | 1.29050100  | 0.79362700  | -1.63061100 |
| O | 2.69985900  | -2.13471800 | 2.14797100  | H | 2.11444400  | 1.05646100  | -2.11674000 |
| C | 4.32399300  | -3.82338600 | 1.84514800  |   |             |             |             |
| H | 4.80549300  | -3.41133200 | 2.73838800  |   |             |             |             |

**Pro:**

|    |             |             |             |   |             |             |             |
|----|-------------|-------------|-------------|---|-------------|-------------|-------------|
| Ca | 1.61991900  | -1.69046900 | -1.27583800 | H | -0.37680900 | -6.07272400 | -3.56893900 |
| Mn | 1.50976700  | 1.42906200  | 0.04719200  | C | 1.70135600  | -6.27045300 | -2.94669700 |
| Mn | 1.38190100  | -0.68669600 | 1.78853300  | H | 2.31517200  | -6.14645300 | -2.04528500 |
| Mn | -1.12978400 | -1.05999300 | 0.47495700  | H | 2.11836600  | -5.61229000 | -3.71728200 |
| Mn | -2.34242600 | -2.77156200 | -1.46639700 | H | 1.79830700  | -7.31140300 | -3.28608900 |
| O  | 2.50132900  | 0.01948700  | 0.51713100  | O | 3.06984000  | 2.54950300  | -0.57969200 |
| O  | 0.18127200  | 0.53574300  | 0.96407600  | C | 3.92951400  | 2.33302600  | -1.50527800 |
| O  | 0.52213900  | -1.90044600 | 0.83353000  | O | 3.83899800  | 1.45722400  | -2.40410300 |
| O  | -0.82211200 | -1.39201700 | -1.43979300 | C | 5.15529500  | 3.24972800  | -1.46327200 |
| O  | -2.10469600 | -2.57844300 | 0.27783500  | H | 4.81634100  | 4.25511700  | -1.17714400 |
| O  | 3.87922600  | -1.31004000 | -2.19119500 | H | 5.78240700  | 2.89893900  | -0.62677300 |
| H  | 4.29706000  | -1.59348100 | -1.35320000 | C | 5.97053700  | 3.28159700  | -2.75881200 |
| H  | 4.02368100  | -0.33423500 | -2.25636600 | H | 5.33174500  | 3.63977000  | -3.57929000 |
| O  | -1.06263800 | -0.42620000 | -2.52100000 | H | 6.25298600  | 2.25556400  | -3.02732000 |
| H  | -1.58846600 | -1.07436400 | -3.10832000 | C | 7.21884200  | 4.16434900  | -2.64896400 |
| O  | -2.38515800 | -2.47889600 | -3.36739700 | H | 6.95499700  | 5.20431200  | -2.40762800 |
| O  | -3.74707200 | -3.88806300 | -1.33522400 | H | 7.89264300  | 3.80511500  | -1.85760400 |
| H  | -3.31285500 | -2.23969500 | -3.54222200 | H | 7.78635100  | 4.17458100  | -3.58965000 |
| H  | -3.84282200 | -4.00440100 | -0.36977200 | N | 0.15464600  | 2.94823500  | -0.50371100 |
| O  | 0.91794700  | -3.63412400 | -2.38627600 | C | -0.56737400 | 2.94965600  | -1.67691100 |
| C  | 0.00426800  | -4.47736100 | -2.22264900 | H | -0.38418000 | 2.18465800  | -2.41993400 |
| O  | -1.15557800 | -4.29151100 | -1.71325000 | C | -1.49201500 | 3.96524300  | -1.63877800 |
| C  | 0.23850000  | -5.92583400 | -2.66767300 | N | -1.30584800 | 4.58712300  | -0.40629000 |
| H  | -0.19390200 | -6.58394100 | -1.90286500 | H | -1.99058900 | 5.21005600  | 0.02425800  |

|   |             |             |             |   |             |             |             |
|---|-------------|-------------|-------------|---|-------------|-------------|-------------|
| C | -0.32038000 | 3.92566600  | 0.25027200  | H | 1.88580200  | 3.76732000  | 3.95943200  |
| H | 0.01756000  | 4.15109500  | 1.25153700  | H | 3.55329200  | 3.41596400  | 3.55105100  |
| C | -2.48709900 | 4.41219900  | -2.67655800 | C | 2.83436000  | 2.32399600  | 5.29542000  |
| H | -1.96906300 | 4.91999800  | -3.50507200 | H | 3.17628300  | 3.07857000  | 6.01724900  |
| H | -2.94402800 | 3.51565000  | -3.11914500 | H | 1.90448100  | 1.88087600  | 5.67152700  |
| C | -3.59924600 | 5.36860100  | -2.17969200 | H | 3.57908900  | 1.52170900  | 5.24872000  |
| H | -3.17357000 | 6.34284900  | -1.91261800 | O | 3.35600400  | -2.68181500 | 0.22990500  |
| H | -4.30860100 | 5.53569800  | -3.00267200 | C | 3.47344300  | -2.65310800 | 1.47833500  |
| C | -4.32011000 | 4.84750500  | -0.93812900 | O | 2.78732900  | -1.94372900 | 2.30517900  |
| O | -4.02603400 | 5.25253100  | 0.19308500  | C | 4.50041600  | -3.56343000 | 2.14343400  |
| N | -5.26312700 | 3.89127200  | -1.16101400 | H | 4.90715900  | -3.09945300 | 3.04808400  |
| H | -5.35612000 | 3.54669000  | -2.10934600 | H | 5.30220000  | -3.80984800 | 1.43979500  |
| C | -5.77973000 | 3.03685400  | -0.08622600 | H | 4.00028000  | -4.49665500 | 2.43788900  |
| H | -5.88137000 | 3.67379600  | 0.79806600  | O | 0.32522600  | -1.10340100 | 3.40033100  |
| H | -6.78368800 | 2.70268100  | -0.38219600 | C | -0.94904100 | -1.18886400 | 3.39521800  |
| C | -4.86060500 | 1.84432200  | 0.22458400  | O | -1.69609600 | -1.05344200 | 2.39432800  |
| H | -3.87900200 | 2.21906000  | 0.53528000  | C | -1.59051400 | -1.47593500 | 4.75024700  |
| H | -5.27324200 | 1.30366900  | 1.08879000  | H | -1.18692100 | -2.44215600 | 5.09090400  |
| C | -4.67955200 | 0.87537100  | -0.94870400 | H | -1.20658000 | -0.72888300 | 5.46127300  |
| H | -4.39032500 | 1.42510900  | -1.85953900 | C | -3.12084800 | -1.50088500 | 4.74805700  |
| H | -5.60916200 | 0.34245700  | -1.18856700 | H | -3.46542500 | -2.23705600 | 4.01024700  |
| C | -3.57475000 | -0.16512700 | -0.73694800 | H | -3.49780600 | -0.52910800 | 4.39987500  |
| O | -2.67016900 | 0.12462400  | 0.09577700  | C | -3.70162000 | -1.82330400 | 6.12983500  |
| O | -3.66381600 | -1.20838000 | -1.45162500 | H | -3.36432000 | -2.80789600 | 6.48508700  |
| O | 1.83587100  | 2.51317200  | 1.72222100  | H | -4.79999900 | -1.83651200 | 6.10821800  |
| C | 2.16488100  | 1.97689800  | 2.83518400  | H | -3.39204400 | -1.08022900 | 6.87953400  |
| O | 2.15533800  | 0.74891900  | 3.10304600  | O | 1.30481300  | 0.72657000  | -1.64740400 |
| C | 2.62437700  | 2.95388000  | 3.91858500  | H | 2.11701600  | 1.03649200  | -2.12437600 |

**Table S32** Reaction parameters for the closed-cubane W3 (hydroxyl)-Wx (hydroxyl) coupling:

| Spin state | Spin topology<br>(Mn1~Mn4-O8)   | Gibbs Free energy (a.u.) |            |            |
|------------|---------------------------------|--------------------------|------------|------------|
|            |                                 | Rea                      | TS         | Pro        |
| doublet    | $\alpha\alpha\beta\alpha$       | -3366.1963               | -3366.1726 | -3366.1782 |
|            | $\alpha\beta\alpha\beta$        | -3366.1976               | -3366.1751 | -3366.1796 |
|            | $\alpha\beta\beta\alpha\alpha$  | -3366.1980               | -3366.1919 | -3366.2223 |
|            | $\beta\alpha\alpha\beta$        | -3366.1988               | -3366.1760 | -3366.1804 |
|            | $\beta\alpha\beta\alpha\alpha$  | -3366.1970               | -3366.1909 | -3366.2212 |
|            | $\beta\beta\alpha\alpha\alpha$  | -3366.1968               | -3366.1909 | -3366.2203 |
| sextet     | $\alpha\alpha\alpha\beta\beta$  | -3366.2000               | -3366.1938 | -3366.2239 |
|            | $\alpha\alpha\beta\alpha\beta$  | -3366.1994               | -3366.1765 | -3366.1809 |
|            | $\alpha\beta\alpha\alpha\beta$  | -3366.1967               | -3366.1742 | -3366.1785 |
|            | $\beta\alpha\alpha\alpha\beta$  | -3366.1984               | -3366.1756 | -3366.1796 |
| octet      | $\alpha\alpha\alpha\beta\alpha$ | -3366.2009               | -3366.1780 | -3366.1824 |

|            | $\alpha\beta\alpha\alpha$        | -3366.1995                            | -3366.1934                 | -3366.2236             |                        |
|------------|----------------------------------|---------------------------------------|----------------------------|------------------------|------------------------|
|            | $\alpha\beta\alpha\alpha\alpha$  | -3366.1973                            | -3366.1911                 | -3366.2207             |                        |
|            | $\beta\alpha\alpha\alpha\alpha$  | -3366.1980                            | -3366.1923                 | -3366.2218             |                        |
| 12-et      | $\alpha\alpha\alpha\alpha\beta$  | -3366.1996                            | -3366.1767                 | -3366.1811             |                        |
| 14-et      | $\alpha\alpha\alpha\alpha\alpha$ | -3366.1998                            | -3366.1938                 | -3366.2231             |                        |
| Spin state | Spin topology<br>(Mn1~Mn4-O8)    | Relative Gibbs Free energy (kcal/mol) |                            |                        |                        |
|            |                                  | $\Delta G^\ddagger(\text{Rea-TS})$    | $\Delta G(\text{Rea-Pro})$ | $\Delta G(\text{Rea})$ | $\Delta G(\text{Pro})$ |
| doublet    | $\alpha\alpha\beta\beta\alpha$   | 14.9                                  | 11.4                       | 2.9                    | 28.5                   |
|            | $\alpha\beta\alpha\beta\alpha$   | 14.1                                  | 11.3                       | 2.1                    | 27.6                   |
|            | $\alpha\beta\beta\alpha\alpha$   | 3.8                                   | -15.2                      | 1.8                    | 0.8                    |
|            | $\beta\alpha\alpha\beta\alpha$   | 14.3                                  | 11.5                       | 1.3                    | 27.1                   |
|            | $\beta\alpha\beta\alpha\alpha$   | 3.8                                   | -15.2                      | 2.4                    | 1.5                    |
|            | $\beta\beta\alpha\alpha\alpha$   | 3.7                                   | -14.7                      | 2.6                    | 2.1                    |
| sextet     | $\alpha\alpha\alpha\beta\beta$   | 3.9                                   | -15.0                      | 0.6                    | -0.2                   |
|            | $\alpha\alpha\beta\alpha\beta$   | 14.4                                  | 11.6                       | 0.9                    | 26.8                   |
|            | $\alpha\beta\alpha\alpha\beta$   | 14.1                                  | 11.4                       | 2.6                    | 28.3                   |
|            | $\beta\alpha\alpha\alpha\beta$   | 14.3                                  | 11.8                       | 1.6                    | 27.6                   |
| octet      | $\alpha\alpha\alpha\beta\alpha$  | 14.4                                  | 11.6                       | 0.0                    | 25.9                   |
|            | $\alpha\alpha\beta\alpha\alpha$  | 3.8                                   | -15.1                      | 0.9                    | 0.0                    |
|            | $\alpha\beta\alpha\alpha\alpha$  | 3.9                                   | -14.7                      | 2.3                    | 1.8                    |
|            | $\beta\alpha\alpha\alpha\alpha$  | 3.6                                   | -14.9                      | 1.8                    | 1.1                    |
| 12-et      | $\alpha\alpha\alpha\alpha\beta$  | 14.4                                  | 11.6                       | 0.8                    | 26.7                   |
| 14-et      | $\alpha\alpha\alpha\alpha\alpha$ | 3.8                                   | -14.6                      | 0.7                    | 0.3                    |

| Spin state | Spin topology<br>(Mn1~Mn4-O8) | Mulliken spin density |       |       |
|------------|-------------------------------|-----------------------|-------|-------|
|            |                               | Rea                   | TS    | Pro   |
| doublet    | $\alpha$ Mn1                  | 2.93                  | 2.93  | 2.94  |
|            | $\alpha$ Mn2                  | 2.94                  | 2.95  | 2.95  |
|            | $\beta$ Mn3                   | -2.83                 | -2.81 | -2.79 |
|            | $\beta$ Mn4                   | -2.86                 | -2.25 | -1.94 |
|            | $\alpha$ O8                   | 0.75                  | 0.27  | 0.01  |
|            | $\alpha$ Mn1                  | 2.92                  | 2.92  | 2.92  |
|            | $\beta$ Mn2                   | -2.94                 | -2.95 | -2.95 |
|            | $\alpha$ Mn3                  | 2.79                  | 2.76  | 2.74  |
|            | $\beta$ Mn4                   | -2.81                 | -2.22 | -1.90 |
|            | $\alpha$ O8                   | 0.75                  | 0.28  | 0.01  |
|            | $\alpha$ Mn1                  | 2.92                  | 2.92  | 2.93  |
|            | $\beta$ Mn2                   | -2.93                 | -2.93 | -2.93 |
|            | $\beta$ Mn3                   | -2.81                 | -2.80 | -2.77 |
|            | $\alpha$ Mn4                  | 2.83                  | 3.29  | 3.84  |
|            | $\alpha$ O8                   | 0.93                  | 0.53  | 0.00  |
|            | $\beta$ Mn1                   | -2.92                 | -2.93 | -2.93 |



|  |          |     |       |       |       |
|--|----------|-----|-------|-------|-------|
|  | $\alpha$ | Mn2 | 2.93  | 2.93  | 2.93  |
|  | $\alpha$ | Mn3 | 2.82  | 2.80  | 2.77  |
|  | $\beta$  | Mn4 | -2.80 | -2.21 | -1.90 |
|  | $\alpha$ | O8  | 0.75  | 0.27  | 0.01  |
|  | $\beta$  | Mn1 | -2.92 | -2.92 | -2.92 |
|  | $\alpha$ | Mn2 | 2.94  | 2.94  | 2.95  |
|  | $\beta$  | Mn3 | -2.79 | -2.78 | -2.75 |
|  | $\alpha$ | Mn4 | 2.83  | 3.29  | 3.85  |
|  | $\alpha$ | O8  | 0.93  | 0.53  | 0.00  |
|  | $\beta$  | Mn1 | -2.93 | -2.93 | -2.94 |
|  | $\beta$  | Mn2 | -2.94 | -2.95 | -2.95 |
|  | $\alpha$ | Mn3 | 2.83  | 2.82  | 2.80  |
|  | $\alpha$ | Mn4 | 2.88  | 3.35  | 3.89  |
|  | $\alpha$ | O8  | 0.92  | 0.53  | 0.00  |
|  | $\alpha$ | Mn1 | 2.93  | 2.92  | 2.93  |
|  | $\alpha$ | Mn2 | 2.93  | 2.93  | 2.93  |
|  | $\alpha$ | Mn3 | 2.82  | 2.81  | 2.78  |
|  | $\beta$  | Mn4 | -2.83 | -3.29 | -3.85 |
|  | $\beta$  | O8  | -0.93 | -0.53 | 0.00  |
|  | $\alpha$ | Mn1 | 2.93  | 2.93  | 2.94  |
|  | $\alpha$ | Mn2 | 2.94  | 2.95  | 2.95  |
|  | $\beta$  | Mn3 | -2.77 | -2.75 | -2.72 |
|  | $\alpha$ | Mn4 | 2.81  | 2.21  | 1.90  |
|  | $\beta$  | O8  | -0.75 | -0.27 | -0.01 |
|  | $\alpha$ | Mn1 | 2.92  | 2.92  | 2.92  |
|  | $\beta$  | Mn2 | -2.94 | -2.94 | -2.95 |
|  | $\alpha$ | Mn3 | 2.84  | 2.82  | 2.80  |
|  | $\alpha$ | Mn4 | 2.86  | 2.25  | 1.95  |
|  | $\beta$  | O8  | -0.76 | -0.27 | -0.01 |
|  | $\beta$  | Mn1 | -2.92 | -2.92 | -2.93 |
|  | $\alpha$ | Mn2 | 2.93  | 2.93  | 2.93  |
|  | $\alpha$ | Mn3 | 2.87  | 2.86  | 2.84  |
|  | $\alpha$ | Mn4 | 2.86  | 2.25  | 1.94  |
|  | $\beta$  | O8  | -0.75 | -0.27 | -0.01 |
|  | $\alpha$ | Mn1 | 2.93  | 2.93  | 2.93  |
|  | $\alpha$ | Mn2 | 2.93  | 2.93  | 2.93  |
|  | $\alpha$ | Mn3 | 2.82  | 2.80  | 2.78  |
|  | $\beta$  | Mn4 | -2.80 | -2.21 | -1.90 |
|  | $\alpha$ | O8  | 0.75  | 0.27  | 0.01  |
|  | $\alpha$ | Mn1 | 2.93  | 2.93  | 2.94  |
|  | $\alpha$ | Mn2 | 2.95  | 2.95  | 2.95  |
|  | $\beta$  | Mn3 | -2.78 | -2.76 | -2.73 |
|  | $\alpha$ | Mn4 | 2.83  | 3.29  | 3.84  |
|  | $\alpha$ | O8  | 0.93  | 0.53  | 0.00  |

|       |          |     |       |       |       |
|-------|----------|-----|-------|-------|-------|
|       | $\alpha$ | Mn1 | 2.93  | 2.93  | 2.93  |
|       | $\beta$  | Mn2 | -2.94 | -2.94 | -2.94 |
|       | $\alpha$ | Mn3 | 2.84  | 2.83  | 2.82  |
|       | $\alpha$ | Mn4 | 2.88  | 3.35  | 3.89  |
|       | $\alpha$ | O8  | 0.92  | 0.53  | 0.00  |
|       | $\beta$  | Mn1 | -2.92 | -2.92 | -2.93 |
|       | $\alpha$ | Mn2 | 2.93  | 2.93  | 2.93  |
|       | $\alpha$ | Mn3 | 2.87  | 2.86  | 2.85  |
|       | $\alpha$ | Mn4 | 2.88  | 3.35  | 3.89  |
|       | $\alpha$ | O8  | 0.92  | 0.53  | 0.00  |
| 12-et | $\alpha$ | Mn1 | 2.93  | 2.93  | 2.93  |
|       | $\alpha$ | Mn2 | 2.93  | 2.93  | 2.93  |
|       | $\alpha$ | Mn3 | 2.87  | 2.86  | 2.85  |
|       | $\alpha$ | Mn4 | 2.86  | 2.24  | 1.94  |
|       | $\alpha$ | O8  | -0.75 | -0.27 | -0.01 |
| 14-et | $\alpha$ | Mn1 | 2.93  | 2.93  | 2.93  |
|       | $\alpha$ | Mn2 | 2.93  | 2.93  | 2.93  |
|       | $\alpha$ | Mn3 | 2.87  | 2.88  | 2.86  |
|       | $\alpha$ | Mn4 | 2.88  | 3.35  | 3.89  |
|       | $\alpha$ | O8  | 0.92  | 0.53  | 0.00  |

**Rea:**

|    |             |             |             |   |             |             |             |
|----|-------------|-------------|-------------|---|-------------|-------------|-------------|
| Ca | -2.72623800 | 0.06289200  | -1.22659000 | O | -2.08534600 | 4.26684800  | -0.72404400 |
| Mn | 0.14828500  | -1.61322900 | -0.74088600 | C | -4.46362200 | 4.44140900  | -0.74228900 |
| Mn | -1.47154400 | -1.69613400 | 1.42279100  | H | -4.82027900 | 4.51366900  | -1.78159100 |
| Mn | -0.21950200 | 0.69877900  | 0.92264500  | H | -5.21443200 | 3.84290900  | -0.21053300 |
| Mn | -0.24613900 | 3.68795500  | -0.45425100 | C | -4.31512800 | 5.83580900  | -0.13243600 |
| O  | -1.56644600 | -2.01278400 | -0.36217000 | H | -3.57635500 | 6.43011500  | -0.68115200 |
| O  | 0.31076600  | -1.18265000 | 1.05757400  | H | -3.99561400 | 5.78018500  | 0.91778200  |
| O  | -1.89679700 | 0.03057100  | 1.13791500  | H | -5.27449700 | 6.36802700  | -0.15581500 |
| O  | -0.20165900 | 0.18645400  | -0.89549700 | O | -0.02456400 | -2.09687200 | -2.59742000 |
| O  | -0.76370100 | 2.33926000  | 0.67446100  | C | -1.08047000 | -2.06896200 | -3.35268200 |
| O  | -4.73677300 | -0.66537900 | -2.54321900 | O | -2.12626300 | -1.43908700 | -3.10080800 |
| H  | -5.09374800 | -1.24377700 | -1.84059500 | C | -0.96014300 | -2.88703300 | -4.63243700 |
| H  | -4.22821700 | -1.24302200 | -3.14636500 | H | -0.95116600 | -3.94957600 | -4.34182900 |
| O  | -2.29888500 | 1.75186300  | -3.06744400 | H | -1.86217300 | -2.71301000 | -5.23142900 |
| H  | -1.47841000 | 2.26948300  | -2.80494200 | C | 0.30774900  | -2.57763200 | -5.44690200 |
| H  | 0.04242100  | 1.71440600  | -1.59397000 | H | 1.18511200  | -2.74247500 | -4.80831400 |
| O  | 0.24382100  | 5.22852900  | -1.25578000 | H | 0.31060400  | -1.51100200 | -5.71785400 |
| H  | 1.21893100  | 5.25607500  | -1.25547300 | C | 0.40825200  | -3.43040900 | -6.71592800 |
| O  | -0.53266900 | 4.79395100  | 1.41806900  | H | 0.43808300  | -4.50203300 | -6.47306900 |
| H  | -1.31336500 | 5.31207500  | 1.14032400  | H | 1.31731200  | -3.19119100 | -7.28315000 |
| H  | -0.88724800 | 3.99032400  | 1.85964400  | H | -0.45180300 | -3.26421300 | -7.37937100 |
| O  | -3.29849600 | 2.36770800  | -0.95695600 | N | 2.17090900  | -1.36074500 | -1.11607400 |
| C  | -3.18884200 | 3.60156100  | -0.80352900 | C | 2.77355600  | -0.38530200 | -1.88205500 |

|   |            |             |             |   |             |             |             |
|---|------------|-------------|-------------|---|-------------|-------------|-------------|
| H | 2.18361800 | 0.34583000  | -2.41807400 | O | -0.75845300 | -3.58241700 | 1.63112800  |
| C | 4.13945900 | -0.52694300 | -1.80527000 | C | 0.44381000  | -5.55732500 | 1.01378100  |
| N | 4.34429500 | -1.62871900 | -0.98187300 | H | 1.52243700  | -5.64720100 | 0.82646400  |
| H | 5.23691600 | -1.83445100 | -0.52590300 | H | -0.04419500 | -6.11271700 | 0.19760000  |
| C | 3.13910100 | -2.08463300 | -0.57445000 | H | -5.67816700 | -2.44226800 | 2.72476100  |
| H | 2.98933500 | -2.91538800 | 0.09873800  | C | 0.05664400  | -6.14189300 | 2.37251100  |
| C | 5.25080400 | 0.26003900  | -2.45009700 | H | 0.34544900  | -7.19921800 | 2.42693400  |
| H | 5.37704000 | -0.04963300 | -3.49852500 | H | 0.55503400  | -5.60773600 | 3.19068200  |
| H | 4.93878700 | 1.31264600  | -2.48700100 | H | -1.02314900 | -6.06647400 | 2.53973600  |
| C | 6.64282300 | 0.15178300  | -1.76713400 | O | -4.37236300 | -1.27906600 | 0.09989500  |
| H | 7.09620300 | -0.82294500 | -1.97929500 | C | -4.31629900 | -1.99955900 | 1.11683200  |
| H | 7.30117900 | 0.91806900  | -2.19860600 | O | -3.24519000 | -2.26077600 | 1.80079000  |
| C | 6.56158200 | 0.27550500  | -0.24772000 | C | -5.56470600 | -2.67272500 | 1.65891900  |
| O | 6.52489600 | -0.72930200 | 0.47385400  | H | -5.45836400 | -3.76184000 | 1.57217800  |
| N | 6.45019400 | 1.53545600  | 0.25228700  | H | -6.44910900 | -2.34283900 | 1.10712500  |
| H | 6.44571700 | 2.30696600  | -0.40390600 | O | -1.09437800 | -1.23863600 | 3.32628400  |
| C | 5.95856700 | 1.78383700  | 1.61194000  | C | -0.51951500 | -0.15848600 | 3.68265600  |
| H | 6.43007200 | 1.04404800  | 2.26575600  | O | -0.08264000 | 0.76226800  | 2.91644200  |
| H | 6.30780600 | 2.77867700  | 1.91656300  | C | -0.34642500 | 0.05292700  | 5.17907000  |
| C | 4.42517700 | 1.67104900  | 1.70924100  | H | 0.24421800  | 0.96346000  | 5.33404900  |
| H | 4.12376100 | 0.66051500  | 1.41132700  | H | -1.34981800 | 0.23194900  | 5.59654700  |
| H | 4.12811400 | 1.78784300  | 2.76089800  | C | 0.29256500  | -1.15318400 | 5.88849800  |
| C | 3.70112200 | 2.70456200  | 0.84316800  | H | 1.28538800  | -1.34251500 | 5.45301600  |
| H | 4.13904500 | 2.73320200  | -0.16712300 | H | -0.31359100 | -2.04452300 | 5.68330400  |
| H | 3.80996900 | 3.72068700  | 1.24552100  | C | 0.42390500  | -0.93546800 | 7.39931100  |
| C | 2.20910600 | 2.46238200  | 0.61229900  | H | 1.04539200  | -0.05789700 | 7.62622400  |
| O | 1.72837000 | 1.33429700  | 0.89455100  | H | 0.88503200  | -1.80536300 | 7.88472600  |
| O | 1.61428800 | 3.46879200  | 0.09124200  | H | -0.55887200 | -0.77553100 | 7.86457500  |
| O | 0.61129700 | -3.51465500 | -0.18961400 | O | -0.03064300 | 2.65704700  | -1.91181800 |
| C | 0.06488100 | -4.09365400 | 0.81369100  |   |             |             |             |

**TS:**

|    |             |             |             |   |             |            |             |
|----|-------------|-------------|-------------|---|-------------|------------|-------------|
| Ca | -2.66674300 | 0.00101500  | -1.22221400 | O | -1.95784600 | 1.61182300 | -3.03275100 |
| Mn | 0.30154800  | -1.56836200 | -0.74364400 | H | -1.33958300 | 1.48940900 | -3.77768400 |
| Mn | -1.35057600 | -1.80437100 | 1.37689800  | H | -0.29127600 | 1.60833000 | -1.69736700 |
| Mn | -0.24136400 | 0.68588000  | 0.96224600  | O | -0.28565800 | 5.14198700 | -1.39017700 |
| Mn | -0.65594800 | 3.63061000  | -0.47114800 | H | 0.68552700  | 5.22226700 | -1.43279200 |
| O  | -1.39417400 | -2.06683900 | -0.42394200 | O | -0.80563600 | 4.77231500 | 1.47575000  |
| O  | 0.40824100  | -1.18066300 | 1.06113200  | H | -1.65428200 | 5.20330500 | 1.25492700  |
| O  | -1.87299600 | -0.10720400 | 1.13803900  | H | -1.05098100 | 3.93131500 | 1.92089500  |
| O  | -0.14248700 | 0.21394000  | -0.86267200 | O | -3.61801800 | 2.11224600 | -0.70942000 |
| O  | -0.92781700 | 2.26816800  | 0.74060600  | C | -3.59129100 | 3.35061300 | -0.64503800 |
| O  | -4.55253000 | -0.84575800 | -2.65749200 | O | -2.53120000 | 4.09680400 | -0.55841000 |
| H  | -4.90672900 | -1.43303200 | -1.95966900 | C | -4.90808900 | 4.12619000 | -0.70698100 |
| H  | -3.97228100 | -1.40201800 | -3.21492300 | H | -5.17517100 | 4.17188500 | -1.77461700 |

|             |             |             |             |    |             |             |             |
|-------------|-------------|-------------|-------------|----|-------------|-------------|-------------|
| H           | -5.67170300 | 3.49926900  | -0.22994900 | H  | 4.11946800  | 1.21411200  | 1.54506600  |
| C           | -4.88154700 | 5.53606300  | -0.11326700 | H  | 3.93786000  | 2.60857000  | 2.60040500  |
| H           | -4.13047700 | 6.15807300  | -0.61223800 | C  | 3.46045100  | 3.00447400  | 0.52364000  |
| H           | -4.64478500 | 5.51227300  | 0.95954300  | H  | 3.89602100  | 2.81598300  | -0.47031900 |
| H           | -5.86123900 | 6.01837900  | -0.22481700 | H  | 3.47055600  | 4.09455700  | 0.65736600  |
| O           | 0.21801100  | -1.98787700 | -2.62845000 | C  | 1.99795300  | 2.57631300  | 0.40390000  |
| C           | -0.82928700 | -2.01335500 | -3.39375700 | O  | 1.63949900  | 1.49486000  | 0.93762600  |
| O           | -1.90509400 | -1.42768700 | -3.15776800 | O  | 1.28997500  | 3.38311700  | -0.29677600 |
| C           | -0.67082900 | -2.84481200 | -4.66236800 | O  | 0.84425500  | -3.46327900 | -0.25342800 |
| H           | -0.76358400 | -3.90136000 | -4.36210700 | C  | 0.31120900  | -4.10456000 | 0.71806100  |
| H           | -1.51810300 | -2.62015200 | -5.32210900 | O  | -0.54208400 | -3.66046100 | 1.54401500  |
| C           | 0.66719900  | -2.64612500 | -5.39151600 | C  | 0.75094100  | -5.55757200 | 0.86521300  |
| H           | 1.48473300  | -2.85884900 | -4.69120200 | H  | 1.82957600  | -5.59768300 | 0.66285800  |
| H           | 0.76875100  | -1.58845000 | -5.68053900 | H  | 0.27431400  | -6.10513400 | 0.03692700  |
| C           | 0.79111700  | -3.53082300 | -6.63656600 | H  | -5.56254500 | -2.78792100 | 2.53679100  |
| H           | 0.72704600  | -4.59612500 | -6.37378400 | C  | 0.40189200  | -6.20112200 | 2.20770500  |
| H           | 1.75133000  | -3.36980100 | -7.14386400 | H  | 0.73081700  | -7.24798500 | 2.22420900  |
| H           | -0.00810200 | -3.31935400 | -7.36053300 | H  | 0.88951000  | -5.67600700 | 3.03831700  |
| N           | 2.33549900  | -1.22585300 | -1.00017700 | H  | -0.67787200 | -6.17178500 | 2.38871000  |
| C           | 2.98274500  | -0.41283800 | -1.90413100 | O  | -4.23777200 | -1.54767900 | -0.02233900 |
| H           | 2.43670600  | 0.09782100  | -2.68557500 | C  | -4.16253200 | -2.28000000 | 0.98448800  |
| C           | 4.33025500  | -0.39947200 | -1.62345800 | O  | -3.09564600 | -2.48357000 | 1.69496100  |
| N           | 4.47852300  | -1.24576600 | -0.53103400 | C  | -5.37970600 | -3.03770300 | 1.48472800  |
| H           | 5.32201600  | -1.28906700 | 0.04857100  | H  | -5.18579100 | -4.11681200 | 1.43676700  |
| C           | 3.25743200  | -1.70210400 | -0.17700300 | H  | -6.25946200 | -2.79051700 | 0.88445900  |
| H           | 3.06376500  | -2.34426100 | 0.66919900  | O  | -1.02637800 | -1.37388700 | 3.29721600  |
| C           | 5.47004800  | 0.32477500  | -2.29441300 | C  | -0.52431600 | -0.26976500 | 3.68865100  |
| H           | 5.70661000  | -0.15168100 | -3.25759500 | O  | -0.12807200 | 0.69403800  | 2.95311200  |
| H           | 5.12725200  | 1.33911100  | -2.54233000 | C  | -0.39699200 | -0.07890100 | 5.19262900  |
| C           | 6.79381200  | 0.40918100  | -1.48670700 | H  | 0.17993400  | 0.83516600  | 5.37615800  |
| H           | 7.29302400  | -0.56599900 | -1.47140700 | H  | -1.41472400 | 0.09067600  | 5.57903200  |
| H           | 7.46573200  | 1.11160800  | -1.99859400 | C  | 0.22663900  | -1.28716800 | 5.91032400  |
| C           | 6.58154300  | 0.80971000  | -0.02787900 | H  | 1.23556300  | -1.46382700 | 5.50768800  |
| O           | 6.54628100  | -0.04296300 | 0.86964400  | H  | -0.36392400 | -2.18134500 | 5.67466800  |
| N           | 6.35691300  | 2.12652500  | 0.21774700  | C  | 0.30404000  | -1.08498900 | 7.42706500  |
| H           | 6.35927500  | 2.76801000  | -0.56596300 | H  | 0.90957000  | -0.20475100 | 7.68474300  |
| C           | 5.78889000  | 2.58470400  | 1.49148900  | H  | 0.75570200  | -1.95622800 | 7.91896600  |
| H           | 6.32667700  | 2.06996900  | 2.29384900  | H  | -0.69554400 | -0.93832000 | 7.85981700  |
| H           | 5.99791900  | 3.65843400  | 1.57721800  | O  | -0.68682000 | 2.46868400  | -2.04223100 |
| C           | 4.28033200  | 2.29602900  | 1.60395700  |    |             |             |             |
| <b>Pro:</b> |             |             |             |    |             |             |             |
| Ca          | -2.66133700 | -0.05485400 | -1.17086500 | Mn | -0.27117600 | 0.70026500  | 0.94266100  |
| Mn          | 0.34716100  | -1.58828800 | -0.71164100 | Mn | -0.76899500 | 3.64228200  | -0.53571000 |
| Mn          | -1.32122100 | -1.82466700 | 1.39062900  | O  | -1.34530900 | -2.11080400 | -0.41507100 |

|   |             |             |             |   |             |             |             |
|---|-------------|-------------|-------------|---|-------------|-------------|-------------|
| O | 0.42466200  | -1.17043000 | 1.07890700  | C | 3.30258800  | -1.65162000 | -0.13081700 |
| O | -1.88526000 | -0.15100200 | 1.13295900  | H | 3.12023000  | -2.30384700 | 0.71018700  |
| O | -0.13800700 | 0.17932300  | -0.87243700 | C | 5.47453500  | 0.44955300  | -2.21738600 |
| O | -1.03817000 | 2.21479100  | 0.62200500  | H | 5.73480700  | -0.01747700 | -3.17906500 |
| O | -4.42503600 | -0.94824600 | -2.71231200 | H | 5.10356700  | 1.45357000  | -2.46645700 |
| H | -4.79897300 | -1.56572700 | -2.05211700 | C | 6.78677000  | 0.57150600  | -1.39571100 |
| H | -3.81088600 | -1.46881000 | -3.26723600 | H | 7.31438300  | -0.38856900 | -1.37654500 |
| O | -1.65593600 | 1.59941900  | -2.97438200 | H | 7.44282400  | 1.29432000  | -1.89967200 |
| H | -1.36755400 | 1.05347100  | -3.73345900 | C | 6.54563000  | 0.96353200  | 0.06098900  |
| H | -0.09312200 | 1.35276100  | -1.88620400 | O | 6.51858200  | 0.10734400  | 0.95576000  |
| O | -0.43144300 | 5.09959200  | -1.54787500 | N | 6.28636700  | 2.27381200  | 0.30533000  |
| H | 0.53608800  | 5.19727200  | -1.61716300 | H | 6.28131700  | 2.91479900  | -0.47882900 |
| O | -1.01947500 | 4.76534900  | 1.54849100  | C | 5.67931200  | 2.71573800  | 1.56721600  |
| H | -1.88706300 | 5.12140700  | 1.27638600  | H | 6.21054500  | 2.21081300  | 2.38005300  |
| H | -1.22105900 | 3.87746100  | 1.91243300  | H | 5.86255100  | 3.79358800  | 1.65991500  |
| O | -3.71330200 | 2.03044800  | -0.89794200 | C | 4.17536200  | 2.39320100  | 1.64269500  |
| C | -3.72818100 | 3.26703000  | -0.73275800 | H | 4.04105600  | 1.30784900  | 1.57877300  |
| O | -2.69411100 | 4.03340900  | -0.64344000 | H | 3.80194700  | 2.69503100  | 2.63123100  |
| C | -5.08120200 | 3.97722700  | -0.67094500 | C | 3.36478300  | 3.08461400  | 0.54451700  |
| H | -5.43601400 | 4.04206900  | -1.71169300 | H | 3.83192800  | 2.91734300  | -0.43877200 |
| H | -5.77825300 | 3.30132400  | -0.15921300 | H | 3.34116400  | 4.17396600  | 0.68494700  |
| C | -5.07065500 | 5.36707200  | -0.03222700 | C | 1.91609500  | 2.62463400  | 0.38031000  |
| H | -4.38042900 | 6.03522100  | -0.55870000 | O | 1.56322300  | 1.55080700  | 0.94750900  |
| H | -4.75743000 | 5.31893800  | 1.01994300  | O | 1.21206600  | 3.37643800  | -0.36980800 |
| H | -6.07389100 | 5.81194300  | -0.05859600 | O | 0.92224100  | -3.46033600 | -0.20352100 |
| O | 0.29026300  | -2.03217100 | -2.60889500 | C | 0.39417500  | -4.10212600 | 0.77173700  |
| C | -0.70752800 | -1.93813800 | -3.42064400 | O | -0.47471200 | -3.66592200 | 1.58410000  |
| O | -1.74027400 | -1.25374700 | -3.22115500 | C | 0.86538800  | -5.54281500 | 0.93891400  |
| C | -0.57687300 | -2.74908300 | -4.70613500 | H | 1.94995600  | -5.55668800 | 0.76625800  |
| H | -0.86420300 | -3.78317400 | -4.45310000 | H | 0.42628600  | -6.10639300 | 0.10077300  |
| H | -1.32372200 | -2.37682800 | -5.41886000 | H | -5.53304800 | -2.90788100 | 2.49671300  |
| C | 0.82882800  | -2.75484900 | -5.32507100 | C | 0.49676500  | -6.18781700 | 2.27534100  |
| H | 1.54376300  | -3.11108500 | -4.57303300 | H | 0.85225300  | -7.22558300 | 2.30705300  |
| H | 1.12142900  | -1.72184300 | -5.56942200 | H | 0.94759800  | -5.64548900 | 3.11551200  |
| C | 0.90773400  | -3.62148300 | -6.58641800 | H | -0.58794700 | -6.18604100 | 2.42704600  |
| H | 0.65371300  | -4.66772400 | -6.36538300 | O | -4.20274000 | -1.66014100 | -0.05049800 |
| H | 1.91864600  | -3.60746300 | -7.01403500 | C | -4.11826700 | -2.38190900 | 0.96481400  |
| H | 0.21301800  | -3.26825900 | -7.36120100 | O | -3.05681300 | -2.54564200 | 1.69198700  |
| N | 2.37400700  | -1.19692000 | -0.95911600 | C | -5.31943100 | -3.17165400 | 1.45383000  |
| C | 3.00613900  | -0.35955700 | -1.85225000 | H | -5.08820800 | -4.24416200 | 1.43195700  |
| H | 2.45416700  | 0.14460600  | -2.63389600 | H | -6.19424800 | -2.96582400 | 0.83118200  |
| C | 4.35015200  | -0.31018800 | -1.55996900 | O | -1.02043600 | -1.35511400 | 3.30105500  |
| N | 4.51306300  | -1.15874800 | -0.47162800 | C | -0.56638500 | -0.22435600 | 3.67844500  |
| H | 5.35113800  | -1.17604600 | 0.11780800  | O | -0.19627200 | 0.74186200  | 2.93288900  |

|   |             |             |            |   |             |             |             |
|---|-------------|-------------|------------|---|-------------|-------------|-------------|
| C | -0.46425800 | -0.00647300 | 5.18040700 | C | 0.29579300  | -0.93584300 | 7.42886100  |
| H | 0.04678400  | 0.94727500  | 5.35637800 | H | 0.83752800  | -0.01268000 | 7.67797600  |
| H | -1.49365500 | 0.09389500  | 5.55943800 | H | 0.80488100  | -1.76781200 | 7.93253000  |
| C | 0.23928500  | -1.16045100 | 5.91438000 | H | -0.71344400 | -0.85410400 | 7.85624400  |
| H | 1.25985700  | -1.27052300 | 5.51741100 | O | -0.38427700 | 2.12641500  | -2.48443400 |
| H | -0.28682600 | -2.09622700 | 5.68735400 |   |             |             |             |

**Table S33** Reaction parameters for the closed-cubane W3 (hydroxyl)-Wx (oxo) nucleophilic attack:

| Spin state | Spin topology<br>(Mn1~Mn4-O8)    | Gibbs Free energy (a.u.) |            |            |
|------------|----------------------------------|--------------------------|------------|------------|
|            |                                  | Rea                      | TS         | Pro        |
| doublet    | $\alpha\alpha\beta\alpha$        | -3365.7204               | -3365.7041 | -3365.7083 |
|            | $\alpha\beta\alpha\beta$         | -3365.7211               | -3365.7027 | -3365.7072 |
|            | $\alpha\beta\beta\alpha$         | -3365.7183               | -3365.7176 | -3365.7580 |
|            | $\beta\alpha\alpha\beta$         | -3365.7182               | -3365.7061 | -3365.7076 |
|            | $\beta\alpha\beta\alpha$         | -3365.7187               | -3365.7179 | -3365.7575 |
|            | $\beta\beta\alpha\alpha$         | -3365.7156               | -3365.7140 | -3365.7480 |
| sextet     | $\alpha\alpha\alpha\beta\beta$   | -3365.7202               | -3365.7192 | -3365.7492 |
|            | $\alpha\alpha\beta\alpha\beta$   | -3365.7231               | -3365.7120 | -3365.7127 |
|            | $\alpha\beta\alpha\alpha\beta$   | -3365.7212               | -3365.7064 | -3365.7069 |
|            | $\beta\alpha\alpha\alpha\beta$   | -3365.7233               | -3365.7061 | -3365.7089 |
| octet      | $\alpha\alpha\alpha\beta\alpha$  | -3365.7238               | -3365.7059 | -3365.7071 |
|            | $\alpha\alpha\beta\alpha\alpha$  | -3365.7211               | -3365.7198 | -3365.7612 |
|            | $\alpha\beta\alpha\alpha\alpha$  | -3365.7164               | -3365.7149 | -3365.7594 |
|            | $\beta\alpha\alpha\alpha\alpha$  | -3365.7185               | -3365.7168 | -3365.7594 |
| 12-et      | $\alpha\alpha\alpha\alpha\beta$  | -3365.7225               | -3365.7080 | -3365.7101 |
| 14-et      | $\alpha\alpha\alpha\alpha\alpha$ | -3365.7206               | -3365.7190 | -3365.7626 |

  

| Spin state | Spin topology<br>(Mn1~Mn4-O8)   | Relative Gibbs Free energy (kcal/mol) |                            |                        |                        |
|------------|---------------------------------|---------------------------------------|----------------------------|------------------------|------------------------|
|            |                                 | $\Delta G^\ddagger(\text{Rea-TS})$    | $\Delta G(\text{Rea-Pro})$ | $\Delta G(\text{Rea})$ | $\Delta G(\text{Pro})$ |
| doublet    | $\alpha\alpha\beta\alpha$       | 10.2                                  | 7.6                        | 2.1                    | 34.1                   |
|            | $\alpha\beta\alpha\beta$        | 11.5                                  | 8.7                        | 1.7                    | 34.8                   |
|            | $\alpha\beta\beta\alpha$        | 0.4                                   | -24.9                      | 3.5                    | 2.9                    |
|            | $\beta\alpha\alpha\beta$        | 7.6                                   | 6.7                        | 3.5                    | 34.5                   |
|            | $\beta\alpha\beta\alpha$        | 0.5                                   | -24.3                      | 3.2                    | 3.2                    |
|            | $\beta\beta\alpha\alpha$        | 1.0                                   | -20.3                      | 5.1                    | 9.2                    |
| sextet     | $\alpha\alpha\alpha\beta\beta$  | 0.6                                   | -18.2                      | 2.3                    | 8.4                    |
|            | $\alpha\alpha\beta\alpha\beta$  | 7.0                                   | 6.5                        | 0.4                    | 31.3                   |
|            | $\alpha\beta\alpha\alpha\beta$  | 9.3                                   | 9.0                        | 1.6                    | 35.0                   |
|            | $\beta\alpha\alpha\alpha\beta$  | 10.8                                  | 9.0                        | 0.3                    | 33.7                   |
| octet      | $\alpha\alpha\alpha\beta\alpha$ | 11.2                                  | 10.5                       | 0.0                    | 34.8                   |
|            | $\alpha\alpha\beta\alpha\alpha$ | 0.8                                   | -25.2                      | 1.7                    | 0.9                    |

|       |                            |     |       |     |      |
|-------|----------------------------|-----|-------|-----|------|
|       | $\alpha\beta\alpha\alpha$  | 0.9 | -27.0 | 4.6 | 2.0  |
|       | $\beta\alpha\alpha\alpha$  | 1.1 | -25.7 | 3.3 | 2.0  |
| 12-et | $\alpha\alpha\alpha\beta$  | 9.1 | 7.8   | 0.8 | 32.9 |
| 14-et | $\alpha\alpha\alpha\alpha$ | 1.0 | -26.4 | 2.0 | 0.0  |

| Spin state | Spin topology |       | Mulliken spin density |       |       |
|------------|---------------|-------|-----------------------|-------|-------|
|            | (Mn1~Mn4-O8)  |       | Rea                   | TS    | Pro   |
| doublet    | $\alpha$      | Mn1   | 2.91                  | 2.91  | 2.91  |
|            | $\alpha$      | Mn2   | 2.94                  | 2.94  | 2.95  |
|            | $\beta$       | Mn3   | -2.82                 | -2.81 | -2.81 |
|            | $\beta$       | Mn4   | -2.69                 | -2.36 | -1.97 |
|            | $\alpha$      | O8    | 0.56                  | 0.36  | 0.01  |
|            | $\alpha$      | Mn1   | 2.93                  | 0.93  | 2.93  |
|            | $\beta$       | Mn2   | -2.94                 | -2.95 | -2.95 |
|            | $\alpha$      | Mn3   | 2.79                  | 2.79  | 2.77  |
|            | $\beta$       | Mn4   | -2.65                 | -2.31 | -1.94 |
|            | $\alpha$      | O8    | 0.57                  | 0.35  | 0.01  |
|            | $\alpha$      | Mn1   | 2.91                  | 2.91  | 2.99  |
|            | $\beta$       | Mn2   | -2.92                 | -2.92 | -2.93 |
|            | $\beta$       | Mn3   | -2.82                 | -2.81 | -2.77 |
|            | $\alpha$      | Mn4   | 2.74                  | 3.07  | 3.90  |
|            | $\alpha$      | O8    | 0.79                  | 0.62  | 0.00  |
|            | $\beta$       | Mn1   | -2.93                 | -2.93 | 2.93  |
|            | $\alpha$      | Mn2   | 2.94                  | 2.95  | -2.95 |
|            | $\alpha$      | Mn3   | 2.79                  | 2.78  | 2.77  |
|            | $\beta$       | Mn4   | -2.65                 | -2.29 | -1.92 |
|            | $\alpha$      | O8    | 0.57                  | 0.34  | 0.01  |
| $\beta$    | Mn1           | -2.93 | -2.92                 | -2.89 |       |
| $\alpha$   | Mn2           | 2.94  | 2.94                  | 2.95  |       |
| $\beta$    | Mn3           | -2.80 | -2.79                 | -2.76 |       |
| $\alpha$   | Mn4           | 2.74  | 3.07                  | 3.91  |       |
| $\alpha$   | O8            | 0.79  | 0.61                  | 0.01  |       |
| $\beta$    | Mn1           | -2.91 | -2.91                 | -2.94 |       |
| $\beta$    | Mn2           | -2.94 | -2.94                 | -2.94 |       |
| $\alpha$   | Mn3           | 2.84  | 2.83                  | 2.81  |       |
| $\alpha$   | Mn4           | 2.81  | 3.12                  | 3.92  |       |
| $\alpha$   | O8            | 0.77  | 0.60                  | 0.01  |       |
| sextet     | $\alpha$      | Mn1   | 2.93                  | 2.92  | 2.93  |
|            | $\alpha$      | Mn2   | 2.92                  | 2.92  | 2.91  |
|            | $\alpha$      | Mn3   | 2.83                  | 2.83  | 2.83  |
|            | $\beta$       | Mn4   | -2.74                 | -3.07 | -3.88 |
|            | $\beta$       | O8    | -0.79                 | -0.61 | -0.01 |
|            | $\alpha$      | Mn1   | 2.91                  | 2.92  | 2.92  |
|            | $\alpha$      | Mn2   | 2.94                  | 2.95  | 2.95  |

|       |          |     |       |       |       |
|-------|----------|-----|-------|-------|-------|
|       | $\beta$  | Mn3 | -2.74 | -2.72 | -2.70 |
|       | $\alpha$ | Mn4 | 2.65  | 2.28  | 1.91  |
|       | $\beta$  | O8  | -0.56 | -0.34 | -0.02 |
|       | $\alpha$ | Mn1 | 2.93  | 2.93  | 2.92  |
|       | $\beta$  | Mn2 | -2.94 | -2.94 | -2.94 |
|       | $\alpha$ | Mn3 | 2.84  | 2.84  | 2.85  |
|       | $\alpha$ | Mn4 | 2.69  | 2.36  | 1.97  |
|       | $\beta$  | O8  | -0.57 | -0.36 | -0.01 |
|       | $\beta$  | Mn1 | -2.90 | -2.90 | -2.91 |
|       | $\alpha$ | Mn2 | 2.92  | 2.92  | 2.93  |
|       | $\alpha$ | Mn3 | 2.87  | 2.86  | 2.87  |
|       | $\alpha$ | Mn4 | 2.69  | 2.35  | 1.97  |
|       | $\beta$  | O8  | -0.56 | -0.36 | -0.01 |
|       | $\alpha$ | Mn1 | 2.93  | 2.93  | 2.93  |
|       | $\alpha$ | Mn2 | 2.91  | 2.92  | 2.92  |
|       | $\alpha$ | Mn3 | 2.83  | 2.83  | 2.79  |
|       | $\beta$  | Mn4 | -2.67 | -2.30 | -1.94 |
|       | $\alpha$ | O8  | 0.55  | 0.34  | 0.01  |
| octet | $\alpha$ | Mn1 | 2.92  | 2.92  | 2.99  |
|       | $\alpha$ | Mn2 | 2.95  | 2.95  | 2.95  |
|       | $\beta$  | Mn3 | -2.77 | -2.76 | -2.73 |
|       | $\alpha$ | Mn4 | 2.74  | 3.07  | 3.90  |
|       | $\alpha$ | O8  | 0.78  | 0.61  | 0.00  |
|       | $\alpha$ | Mn1 | 2.93  | 2.92  | 2.99  |
|       | $\beta$  | Mn2 | -2.93 | -2.93 | -2.94 |
|       | $\alpha$ | Mn3 | 2.88  | 2.87  | 2.80  |
|       | $\alpha$ | Mn4 | 2.82  | 3.11  | 3.92  |
|       | $\alpha$ | O8  | 0.76  | 0.61  | 0.01  |
|       | $\beta$  | Mn1 | -2.90 | -2.90 | -2.90 |
|       | $\alpha$ | Mn2 | 2.92  | 2.92  | 2.93  |
|       | $\alpha$ | Mn3 | 2.89  | 2.88  | 2.81  |
|       | $\alpha$ | Mn4 | 2.82  | 3.11  | 3.95  |
|       | $\alpha$ | O8  | 0.76  | 0.61  | 0.01  |
| 12-et | $\alpha$ | Mn1 | 2.93  | 2.92  | 2.92  |
|       | $\alpha$ | Mn2 | 2.92  | 2.92  | 2.93  |
|       | $\alpha$ | Mn3 | 2.89  | 2.89  | 2.89  |
|       | $\alpha$ | Mn4 | 2.59  | 2.36  | 1.97  |
|       | $\beta$  | O8  | -0.57 | -0.36 | -0.01 |
| 14-et | $\alpha$ | Mn1 | 2.93  | 2.93  | 2.99  |
|       | $\alpha$ | Mn2 | 2.92  | 2.92  | 2.93  |
|       | $\alpha$ | Mn3 | 2.91  | 2.91  | 2.83  |
|       | $\alpha$ | Mn4 | 2.82  | 3.11  | 3.93  |
|       | $\alpha$ | O8  | 0.76  | 0.61  | 0.01  |

Rea:



|    |             |             |             |   |             |             |             |
|----|-------------|-------------|-------------|---|-------------|-------------|-------------|
| Ca | 2.45113800  | -0.00512400 | -1.31504800 | C | -3.19794400 | 1.29603800  | -1.62832300 |
| Mn | -0.37241200 | 1.71062600  | -0.26902100 | H | -2.72697600 | 1.26851100  | -2.60171000 |
| Mn | 1.29383900  | 1.31623300  | 1.79552100  | C | -4.51478500 | 1.09979300  | -1.27872100 |
| Mn | 0.05434300  | -0.93784900 | 0.75312600  | N | -4.54652600 | 1.25683900  | 0.10369700  |
| Mn | 0.69205000  | -3.15204500 | -1.49539700 | H | -5.34220400 | 1.02451100  | 0.69976200  |
| O  | 1.34436200  | 2.03279400  | 0.12443800  | C | -3.28397600 | 1.49947900  | 0.52982200  |
| O  | -0.49969900 | 0.90593500  | 1.38670800  | H | -2.98734500 | 1.59608600  | 1.56449900  |
| O  | 1.71813200  | -0.27747000 | 1.12662500  | C | -5.71435800 | 0.76480500  | -2.12799600 |
| O  | -0.04994000 | 0.03848000  | -0.83022600 | H | -5.97780900 | 1.61894200  | -2.77040100 |
| O  | 0.74057700  | -2.44191800 | 0.21771600  | H | -5.42971900 | -0.04329000 | -2.81802400 |
| O  | 4.40843300  | 1.37459300  | -2.36571300 | C | -6.99608200 | 0.35562800  | -1.35965200 |
| H  | 4.61830300  | 1.71419000  | -1.47044000 | H | -7.43545700 | 1.22542800  | -0.85874300 |
| H  | 3.73233800  | 1.97597500  | -2.73676700 | H | -7.73382500 | -0.01183100 | -2.08709900 |
| O  | 2.81544100  | -1.33343500 | -3.40737300 | C | -6.75344800 | -0.68642800 | -0.26546600 |
| H  | 3.23689900  | -2.13397500 | -3.03943000 | O | -6.76321400 | -0.36776400 | 0.93074500  |
| O  | 0.53063800  | -4.27761300 | -2.96176400 | N | -6.48110500 | -1.95051900 | -0.68215200 |
| H  | 0.71488900  | -3.72216500 | -3.73913900 | H | -6.37550500 | -2.10461300 | -1.67808100 |
| O  | 0.30218600  | -5.35973700 | -0.64333800 | C | -5.90324800 | -2.95388000 | 0.22311400  |
| H  | 0.23980800  | -5.52697400 | -1.61080600 | H | -6.46716600 | -2.90218600 | 1.16020100  |
| H  | 1.26881100  | -5.34370000 | -0.48866500 | H | -6.08429400 | -3.93811100 | -0.22865300 |
| O  | 3.72364000  | -2.01831300 | -0.67016600 | C | -4.40505700 | -2.73585200 | 0.49529900  |
| C  | 3.49027100  | -3.23331200 | -0.59225100 | H | -4.26540100 | -1.77495800 | 1.00197700  |
| O  | 2.48897000  | -3.86001500 | -1.13603300 | H | -4.06841000 | -3.51042800 | 1.19950300  |
| C  | 4.43599100  | -4.15294200 | 0.18298100  | C | -3.54653600 | -2.77802700 | -0.77112400 |
| H  | 3.89333400  | -4.45305100 | 1.09329600  | H | -3.91770500 | -2.04267500 | -1.50267000 |
| H  | 4.57629600  | -5.07294500 | -0.40157900 | H | -3.59076100 | -3.76051500 | -1.25835900 |
| C  | 5.77200400  | -3.50458500 | 0.54407000  | C | -2.06599400 | -2.43150600 | -0.56515700 |
| H  | 5.61126200  | -2.59177800 | 1.12775700  | O | -1.79258400 | -1.66055500 | 0.40593200  |
| H  | 6.32956600  | -3.22103600 | -0.35759100 | O | -1.29592700 | -2.93367000 | -1.43389300 |
| H  | 6.39420200  | -4.19455600 | 1.13093400  | O | -0.79927800 | 3.50594500  | 0.71551200  |
| O  | -0.34046500 | 2.56618000  | -2.02449100 | C | -0.22392000 | 3.82361100  | 1.80320100  |
| C  | 0.66299800  | 2.60435600  | -2.83857400 | O | 0.60527400  | 3.12773400  | 2.47080200  |
| O  | 1.72145100  | 1.95551900  | -2.72890500 | C | -0.53796400 | 5.20452700  | 2.38614900  |
| C  | 0.45258200  | 3.53981200  | -4.03201600 | H | 0.38418400  | 5.79800900  | 2.28790800  |
| H  | -0.43013700 | 3.17005900  | -4.57762700 | H | -0.69256200 | 5.07518500  | 3.46604900  |
| H  | 0.16141900  | 4.52440100  | -3.63587300 | H | 5.25401500  | 3.36812200  | 2.29383900  |
| C  | 1.65277900  | 3.65563300  | -4.97405300 | C | -1.71539200 | 5.92988900  | 1.73424800  |
| H  | 1.94326300  | 2.65152800  | -5.30978700 | H | -1.86071300 | 6.91948900  | 2.18928500  |
| H  | 2.51460800  | 4.04814200  | -4.41528900 | H | -1.54827300 | 6.06025700  | 0.65926800  |
| C  | 1.36807500  | 4.55547500  | -6.18202800 | H | -2.64582300 | 5.35993600  | 1.85215200  |
| H  | 0.53164600  | 4.16624600  | -6.78060400 | O | 4.11819200  | 1.29605000  | 0.29849300  |
| H  | 2.24346500  | 4.62697000  | -6.84172500 | C | 4.11098900  | 1.74077800  | 1.46128400  |
| H  | 1.10164200  | 5.57574400  | -5.86918100 | O | 3.09086400  | 1.79349900  | 2.25612900  |
| N  | -2.45518100 | 1.54274600  | -0.49892600 | C | 5.38842300  | 2.30019400  | 2.07718100  |

|   |             |             |            |   |             |             |             |
|---|-------------|-------------|------------|---|-------------|-------------|-------------|
| H | 6.23430300  | 2.16335500  | 1.39712300 | C | -0.07960500 | -0.23559300 | 6.15395300  |
| H | 5.58992800  | 1.79767000  | 3.03112000 | H | -1.04727500 | 0.23129900  | 5.91462200  |
| O | 0.95233400  | 0.42487100  | 3.57480800 | H | 0.66707900  | 0.56677000  | 6.10803800  |
| C | 0.37120500  | -0.70641800 | 3.66990300 | C | -0.13226100 | -0.83542300 | 7.56335000  |
| O | -0.10349600 | -1.41934600 | 2.73305700 | H | -0.89106700 | -1.62812500 | 7.63467900  |
| C | 0.25376300  | -1.28086700 | 5.08130100 | H | -0.37657000 | -0.07137900 | 8.31424800  |
| H | -0.49105300 | -2.08599700 | 5.06053300 | H | 0.83441600  | -1.27951800 | 7.84197100  |
| H | 1.22494400  | -1.74871000 | 5.31252100 | O | 1.01108500  | -1.77682900 | -2.38520300 |

**TS:**

|    |             |             |             |   |             |             |             |
|----|-------------|-------------|-------------|---|-------------|-------------|-------------|
| Ca | -2.42896100 | 0.10867500  | -1.25220000 | H | -0.06742200 | -4.06204900 | -4.12446900 |
| Mn | 0.42098900  | -1.67362200 | -0.42967900 | C | -1.56463400 | -3.05065300 | -5.35032500 |
| Mn | -1.25846200 | -1.55012400 | 1.65587500  | H | -1.86490800 | -2.01591700 | -5.56152800 |
| Mn | -0.08802400 | 0.84771700  | 0.85382500  | H | -2.42393700 | -3.51835400 | -4.84837100 |
| Mn | -0.77066400 | 3.27709000  | -1.18610200 | C | -1.26593000 | -3.79142000 | -6.65883800 |
| O  | -1.28500900 | -2.08168700 | -0.08504500 | H | -0.43165000 | -3.32255700 | -7.20062200 |
| O  | 0.52315300  | -1.05064700 | 1.30249300  | H | -2.13808500 | -3.79017200 | -7.32668300 |
| O  | -1.72854400 | 0.08935200  | 1.16260000  | H | -0.98943900 | -4.83962100 | -6.47293200 |
| O  | 0.05643700  | 0.03997500  | -0.81389600 | N | 2.50309200  | -1.43582000 | -0.62121600 |
| O  | -0.86233600 | 2.33741500  | 0.42102100  | C | 3.26304800  | -1.09543200 | -1.71418900 |
| O  | -4.33859000 | -1.08196600 | -2.53790800 | H | 2.81131100  | -1.00898600 | -2.69327000 |
| H  | -4.58019200 | -1.54248300 | -1.70620500 | C | 4.56854900  | -0.89899500 | -1.32372600 |
| H  | -3.66287400 | -1.64139400 | -2.97138500 | N | 4.57588300  | -1.15393600 | 0.04436200  |
| O  | -2.51235600 | 1.80151600  | -3.12047300 | H | 5.35494800  | -0.95361200 | 0.67279300  |
| H  | -2.90579800 | 2.63086200  | -2.78579000 | C | 3.31047900  | -1.45058200 | 0.42530700  |
| O  | -0.63171900 | 4.59214400  | -2.50286800 | H | 2.99397200  | -1.62590700 | 1.44372700  |
| H  | -0.35296500 | 4.13605500  | -3.31500200 | C | 5.77696300  | -0.47641900 | -2.11964600 |
| O  | -0.42460800 | 5.25612000  | -0.06274600 | H | 6.07480200  | -1.27517900 | -2.81604900 |
| H  | -0.27926800 | 5.55565600  | -0.99290600 | H | 5.48713600  | 0.37300200  | -2.75589400 |
| H  | -1.39911800 | 5.29006100  | 0.03214500  | C | 7.03154800  | -0.09490800 | -1.29447800 |
| O  | -3.80832200 | 1.96970900  | -0.45646300 | H | 7.48462500  | -0.98922400 | -0.85248000 |
| C  | -3.61966600 | 3.19091100  | -0.33095800 | H | 7.77335900  | 0.34656000  | -1.97516700 |
| O  | -2.63762600 | 3.87228200  | -0.83662400 | C | 6.74113100  | 0.85237700  | -0.12768400 |
| C  | -4.61146600 | 4.03952100  | 0.46910400  | O | 6.75044900  | 0.44376200  | 1.04079600  |
| H  | -4.09188500 | 4.33032800  | 1.39593900  | N | 6.42942600  | 2.13446500  | -0.45061000 |
| H  | -4.78527500 | 4.97349000  | -0.08358900 | H | 6.32635000  | 2.36025800  | -1.43302300 |
| C  | -5.92254000 | 3.32432100  | 0.79357800  | C | 5.81640300  | 3.04985000  | 0.52231400  |
| H  | -5.72889600 | 2.39797100  | 1.34518100  | H | 6.37691900  | 2.94570500  | 1.45712400  |
| H  | -6.45984400 | 3.05079200  | -0.12337500 | H | 5.97061600  | 4.06965300  | 0.14559300  |
| H  | -6.57866900 | 3.96551500  | 1.39888500  | C | 4.32354200  | 2.77115400  | 0.76732900  |
| O  | 0.40357300  | -2.32180200 | -2.27584900 | H | 4.20767600  | 1.77718300  | 1.21243200  |
| C  | -0.59425700 | -2.26297700 | -3.09454300 | H | 3.96042000  | 3.49076200  | 1.51537100  |
| O  | -1.65984300 | -1.64106600 | -2.91284400 | C | 3.47258500  | 2.86773800  | -0.50150700 |
| C  | -0.36920700 | -3.03907000 | -4.39538400 | H | 3.85612300  | 2.17064100  | -1.26354200 |
| H  | 0.51044800  | -2.59353100 | -4.88664900 | H | 3.51417300  | 3.87366600  | -0.93915300 |

|   |             |             |             |   |             |             |             |
|---|-------------|-------------|-------------|---|-------------|-------------|-------------|
| C | 1.99292500  | 2.50323000  | -0.32141300 | C | -5.32971700 | -2.67653400 | 1.75275600  |
| O | 1.72429300  | 1.66699400  | 0.59933000  | H | -6.16763900 | -2.50042600 | 1.07183200  |
| O | 1.21762800  | 3.05604700  | -1.14973100 | H | -5.56696400 | -2.27942700 | 2.74736700  |
| O | 0.88871700  | -3.55687800 | 0.34977700  | O | -0.95039100 | -0.83619400 | 3.51828200  |
| C | 0.32197800  | -4.00551300 | 1.39516500  | C | -0.41766400 | 0.30347100  | 3.73217200  |
| O | -0.52391100 | -3.40781600 | 2.13304700  | O | 0.03875000  | 1.12431800  | 2.87860200  |
| C | 0.67272400  | -5.43293000 | 1.82564400  | C | -0.34284600 | 0.74176600  | 5.19475900  |
| H | -0.23898300 | -6.03265100 | 1.68013200  | H | 0.39393700  | 1.55123400  | 5.26946900  |
| H | 0.84291400  | -5.41311400 | 2.91087700  | H | -1.32393600 | 1.18095300  | 5.44046100  |
| H | -5.16085800 | -3.75554900 | 1.86466100  | C | -0.02919600 | -0.39493300 | 6.17587700  |
| C | 1.85367700  | -6.06098500 | 1.08525100  | H | 0.94860200  | -0.83192100 | 5.92183600  |
| H | 2.02717700  | -7.08866200 | 1.43363100  | H | -0.76673900 | -1.19490600 | 6.03642000  |
| H | 1.67115100  | -6.08409600 | 0.00507400  | C | -0.02006800 | 0.07379300  | 7.63512600  |
| H | 2.77372600  | -5.48517300 | 1.24725000  | H | 0.72924000  | 0.86171800  | 7.79953100  |
| O | -4.06945500 | -1.44276300 | 0.11790600  | H | 0.21079200  | -0.75401100 | 8.31981600  |
| C | -4.06207200 | -2.01398000 | 1.22494900  | H | -0.99787700 | 0.48428100  | 7.92622800  |
| O | -3.05259100 | -2.12358900 | 2.02704000  | O | -0.97900600 | 1.97387000  | -2.28110100 |

**Pro:**

|    |             |             |             |   |             |             |             |
|----|-------------|-------------|-------------|---|-------------|-------------|-------------|
| Ca | -2.48308000 | 0.35397500  | -0.88694900 | C | -6.40079000 | 2.67265200  | 1.35426600  |
| Mn | 0.48999400  | -1.33753700 | -1.02427900 | H | -6.22175400 | 1.73470100  | 1.89327100  |
| Mn | -1.05410900 | -2.22211500 | 0.98049400  | H | -6.63809100 | 2.40883600  | 0.31704700  |
| Mn | -0.07670700 | 0.38951600  | 1.21042700  | H | -7.27610300 | 3.16796300  | 1.79845900  |
| Mn | -1.03562300 | 3.34570900  | 0.31621800  | O | 0.39520600  | -1.14755400 | -2.97174700 |
| O  | -1.16841700 | -1.97601400 | -0.82263900 | C | -0.64815500 | -0.81092900 | -3.65444500 |
| O  | 0.66974900  | -1.49148800 | 0.79945700  | O | -1.73750300 | -0.41968600 | -3.18934300 |
| O  | -1.64616600 | -0.57238400 | 1.24455700  | C | -0.45074300 | -0.91015000 | -5.16985000 |
| O  | 0.00511600  | 0.34972100  | -0.64583500 | H | 0.35312200  | -0.20466400 | -5.43441000 |
| O  | -0.99184300 | 1.84453600  | 1.41719100  | H | -0.04843600 | -1.91051800 | -5.38907500 |
| O  | -4.37773000 | -0.19685800 | -2.53188700 | C | -1.70353600 | -0.62426100 | -6.00043500 |
| H  | -4.60144100 | -0.97576800 | -1.97970600 | H | -2.09740100 | 0.36325800  | -5.72648700 |
| H  | -3.71681100 | -0.50736400 | -3.18384700 | H | -2.48731200 | -1.34798200 | -5.73345700 |
| O  | -2.43522800 | 3.35723900  | -1.98666200 | C | -1.43699200 | -0.68604000 | -7.50881700 |
| H  | -2.08742100 | 4.25394900  | -1.72769100 | H | -0.68076600 | 0.05327600  | -7.81022900 |
| O  | -0.97459600 | 5.08799900  | -0.55301600 | H | -2.34975000 | -0.48103000 | -8.08457000 |
| H  | -0.12240700 | 5.07863200  | -1.02502500 | H | -1.06715200 | -1.67678200 | -7.81105700 |
| O  | -0.67600900 | 4.81329900  | 1.98490700  | N | 2.54368300  | -0.90226300 | -1.16729600 |
| H  | -0.71329200 | 5.38601000  | 1.16539500  | C | 3.23812000  | -0.14541000 | -2.08001500 |
| H  | -1.61882400 | 4.73601900  | 2.23610300  | H | 2.73765500  | 0.26905100  | -2.94479800 |
| O  | -3.96482800 | 1.83629000  | 0.28310700  | C | 4.55257700  | -0.03911400 | -1.68443500 |
| C  | -3.90796900 | 2.96441900  | 0.80437500  | N | 4.63391600  | -0.77930600 | -0.50863900 |
| O  | -2.86997700 | 3.72731700  | 0.89278500  | H | 5.43386400  | -0.78675200 | 0.12499000  |
| C  | -5.17246400 | 3.57946700  | 1.41619800  | C | 3.39975600  | -1.26028900 | -0.22575900 |
| H  | -4.93642700 | 3.85561400  | 2.45467200  | H | 3.13707800  | -1.81569100 | 0.66358800  |
| H  | -5.35637700 | 4.52911800  | 0.89169900  | C | 5.70489000  | 0.71085800  | -2.30228800 |

|   |             |             |             |   |             |             |             |
|---|-------------|-------------|-------------|---|-------------|-------------|-------------|
| H | 6.00969100  | 0.23521600  | -3.24708000 | H | 1.30722800  | -6.09309700 | 0.39892800  |
| H | 5.34809200  | 1.71328000  | -2.58187100 | H | -4.82056200 | -4.59084000 | 0.39449200  |
| C | 6.97422100  | 0.84325700  | -1.42367400 | C | 2.23309900  | -5.83731500 | -1.56363000 |
| H | 7.49458200  | -0.11855900 | -1.35678800 | H | 2.47933000  | -6.90072500 | -1.69058100 |
| H | 7.65935800  | 1.55367300  | -1.90783700 | H | 1.98475200  | -5.41641700 | -2.54433800 |
| C | 6.68934700  | 1.26854000  | 0.01924000  | H | 3.13142700  | -5.31879400 | -1.20517400 |
| O | 6.79112600  | 0.46062500  | 0.95144700  | O | -3.97015200 | -1.67960200 | -0.27984400 |
| N | 6.27724800  | 2.54948600  | 0.20427000  | C | -3.86068200 | -2.66128400 | 0.48200400  |
| H | 6.10205500  | 3.11129100  | -0.62059300 | O | -2.79890200 | -3.02352900 | 1.12505700  |
| C | 5.66896400  | 2.99247300  | 1.46704500  | C | -5.05836400 | -3.57215500 | 0.72716100  |
| H | 6.29585500  | 2.60642700  | 2.27761900  | H | -5.93903300 | -3.20196500 | 0.19413500  |
| H | 5.72918300  | 4.08874400  | 1.48425600  | H | -5.26808600 | -3.62180400 | 1.80283000  |
| C | 4.21730900  | 2.51759800  | 1.65022200  | O | -0.66216300 | -2.31995200 | 2.95615200  |
| H | 4.19736000  | 1.42463200  | 1.71665700  | C | -0.18954300 | -1.32896000 | 3.60810100  |
| H | 3.85651800  | 2.89392600  | 2.61837900  | O | 0.16523700  | -0.19593200 | 3.16012700  |
| C | 3.28071400  | 2.98174100  | 0.53157800  | C | -0.05829000 | -1.52574700 | 5.11846000  |
| H | 3.64522700  | 2.61074000  | -0.43951500 | H | 0.64801300  | -0.77659000 | 5.49758900  |
| H | 3.24978200  | 4.07746000  | 0.46442000  | H | -1.04238600 | -1.28043600 | 5.55123400  |
| C | 1.83303500  | 2.48691800  | 0.64622100  | C | 0.34869700  | -2.94374600 | 5.53789700  |
| O | 1.66061200  | 1.37506100  | 1.24702800  | H | 1.32872400  | -3.18362700 | 5.09796600  |
| O | 0.97174200  | 3.22601000  | 0.09964300  | H | -0.36278400 | -3.65798800 | 5.10545500  |
| O | 1.09437500  | -3.33427700 | -1.13716900 | C | 0.41298800  | -3.11044100 | 7.06020600  |
| C | 0.62273200  | -4.21961800 | -0.35669300 | H | 1.13815600  | -2.41693900 | 7.51023000  |
| O | -0.19870100 | -4.04952400 | 0.59920800  | H | 0.71032700  | -4.13090100 | 7.33881100  |
| C | 1.07075500  | -5.66617900 | -0.58535500 | H | -0.56420100 | -2.90990900 | 7.52305000  |
| H | 0.18293900  | -6.21257300 | -0.93942200 | O | -1.39504400 | 2.55169700  | -1.31428100 |

**Table S34** Reaction parameters for the closed-cubane W3 (hydroxyl)-O5 (oxo) nucleophilic attack:

| Spin state | Spin topology<br>(Mn1~Mn4-O8)   | Gibbs Free energy (a.u.) |            |            |
|------------|---------------------------------|--------------------------|------------|------------|
|            |                                 | Rea                      | TS         | Pro        |
| doublet    | $\alpha\alpha\beta\beta\alpha$  | -3365.7244               | -3365.7102 | -3365.7361 |
|            | $\alpha\beta\alpha\beta\alpha$  | -3365.7263               | -3365.7147 | -3365.7423 |
|            | $\alpha\beta\beta\alpha\alpha$  | -3365.7275               | -3365.7142 | -3365.7419 |
|            | $\beta\alpha\alpha\beta\alpha$  | -3365.7274               | -3365.7132 | -3365.7120 |
|            | $\beta\alpha\beta\alpha\alpha$  | -3365.7267               | -3365.7046 | -3365.7124 |
|            | $\beta\beta\alpha\alpha\alpha$  | -3365.7241               | -3365.7109 | -3365.7374 |
| sextet     | $\alpha\alpha\alpha\beta\beta$  | -3365.7289               | -3365.7073 | -3365.7146 |
|            | $\alpha\alpha\beta\alpha\beta$  | -3365.7228               | -3365.7084 | -3365.7332 |
|            | $\alpha\beta\alpha\alpha\beta$  | -3365.7265               | -3365.7035 | -3365.7099 |
|            | $\beta\alpha\alpha\alpha\beta$  | -3365.7211               | -3365.7072 | -3365.7370 |
| octet      | $\alpha\alpha\alpha\beta\alpha$ | -3365.7291               | -3365.7176 | -3365.7411 |
|            | $\alpha\alpha\beta\alpha\alpha$ | -3365.7284               | -3365.7151 | -3365.7414 |

|       |                                  |            |            |            |
|-------|----------------------------------|------------|------------|------------|
|       | $\alpha\beta\alpha\alpha$        | -3365.7254 | -3365.7135 | -3365.7404 |
|       | $\beta\alpha\alpha\alpha$        | -3365.7260 | -3365.7123 | -3365.7371 |
| 12-et | $\alpha\alpha\alpha\alpha\beta$  | -3365.7264 | -3365.7047 | -3365.7110 |
| 14-et | $\alpha\alpha\alpha\alpha\alpha$ | -3365.7275 | -3365.7155 | -3365.7398 |

| Spin state | Spin topology<br>(Mn1~Mn4-O4/O10) | Relative Gibbs Free energy (kcal/mol) |                            |                        |                        |
|------------|-----------------------------------|---------------------------------------|----------------------------|------------------------|------------------------|
|            |                                   | $\Delta G^\ddagger(\text{Rea-TS})$    | $\Delta G(\text{Rea-Pro})$ | $\Delta G(\text{Rea})$ | $\Delta G(\text{Pro})$ |
| doublet    | $\alpha\alpha\beta\beta\alpha$    | 8.9                                   | -7.3                       | 2.5                    | 3.9                    |
|            | $\alpha\beta\alpha\beta\alpha$    | 7.3                                   | -10.0                      | 1.3                    | 0.0                    |
|            | $\alpha\beta\beta\alpha\alpha$    | 8.3                                   | -9.0                       | 0.6                    | 0.3                    |
|            | $\beta\alpha\alpha\beta\alpha$    | 8.9                                   | 9.7                        | 0.6                    | 19.0                   |
|            | $\beta\alpha\beta\alpha\alpha$    | 13.9                                  | 9.0                        | 1.1                    | 18.8                   |
|            | $\beta\beta\alpha\alpha\alpha$    | 8.3                                   | -8.3                       | 2.7                    | 3.1                    |
| sextet     | $\alpha\alpha\alpha\beta\beta$    | 13.6                                  | 9.0                        | -0.3                   | 17.4                   |
|            | $\alpha\alpha\beta\alpha\beta$    | 9.0                                   | -6.5                       | 3.5                    | 5.7                    |
|            | $\alpha\beta\alpha\alpha\beta$    | 14.4                                  | 10.4                       | 1.2                    | 20.3                   |
|            | $\beta\alpha\alpha\alpha\beta$    | 8.7                                   | -10.0                      | 4.6                    | 3.3                    |
| octet      | $\alpha\alpha\alpha\beta\alpha$   | 7.2                                   | -7.5                       | -0.4                   | 0.8                    |
|            | $\alpha\alpha\beta\alpha\alpha$   | 8.3                                   | -8.2                       | 0.0                    | 0.6                    |
|            | $\alpha\beta\alpha\alpha\alpha$   | 7.5                                   | -9.4                       | 1.9                    | 1.2                    |
|            | $\beta\alpha\alpha\alpha\alpha$   | 8.6                                   | -7.0                       | 1.5                    | 3.3                    |
| 12-et      | $\alpha\alpha\alpha\alpha\beta$   | 13.6                                  | 9.7                        | 1.3                    | 19.6                   |
| 14-et      | $\alpha\alpha\alpha\alpha\alpha$  | 7.5                                   | -7.7                       | 0.6                    | 1.6                    |

| Spin state | Spin topology<br>(Mn1~Mn4-O8) | Mulliken spin density |       |       |
|------------|-------------------------------|-----------------------|-------|-------|
|            |                               | Rea                   | TS    | Pro   |
| doublet    | $\alpha$ Mn1                  | 2.92                  | 3.32  | 3.87  |
|            | $\alpha$ Mn2                  | 2.94                  | 2.95  | 2.96  |
|            | $\beta$ Mn3                   | -2.77                 | -2.69 | -2.82 |
|            | $\beta$ Mn4                   | -2.92                 | -2.91 | -2.91 |
|            | $\alpha$ O8                   | 0.95                  | 0.60  | 0.01  |
|            | $\alpha$ Mn1                  | 2.92                  | 3.21  | 3.87  |
|            | $\beta$ Mn2                   | -2.94                 | -2.93 | -2.90 |
|            | $\alpha$ Mn3                  | 2.75                  | 2.90  | 2.82  |
|            | $\beta$ Mn4                   | -2.84                 | -2.84 | -2.84 |
|            | $\alpha$ O8                   | 0.96                  | 0.65  | 0.00  |
| doublet    | $\alpha$ Mn1                  | 2.91                  | 3.29  | 3.88  |
|            | $\beta$ Mn2                   | -2.92                 | -2.92 | -2.89 |
|            | $\beta$ Mn3                   | -2.75                 | -2.68 | -2.78 |
|            | $\alpha$ Mn4                  | 2.83                  | 2.84  | 2.84  |
|            | $\alpha$ O8                   | 0.96                  | 0.63  | 0.01  |
|            | $\beta$ Mn1                   | -2.91                 | -2.82 | -1.98 |
|            | $\alpha$ Mn2                  | 2.92                  | 2.93  | 2.91  |

|        |          |     |       |       |       |
|--------|----------|-----|-------|-------|-------|
|        | $\alpha$ | Mn3 | 2.75  | 3.27  | 2.79  |
|        | $\beta$  | Mn4 | -2.84 | -2.83 | -2.84 |
|        | $\alpha$ | O8  | 0.96  | 0.54  | 0.00  |
|        | $\beta$  | Mn1 | -2.91 | -2.56 | -1.97 |
|        | $\alpha$ | Mn2 | 2.94  | 2.95  | 2.93  |
|        | $\beta$  | Mn3 | -2.74 | -2.67 | -2.74 |
|        | $\alpha$ | Mn4 | 2.84  | 2.84  | 2.84  |
|        | $\alpha$ | O8  | 0.96  | 0.49  | 0.01  |
|        | $\beta$  | Mn1 | -2.92 | -2.85 | -2.88 |
|        | $\beta$  | Mn2 | -2.94 | -2.93 | -2.89 |
|        | $\alpha$ | Mn3 | 2.77  | 3.27  | 3.83  |
|        | $\alpha$ | Mn4 | 2.91  | 2.92  | 2.92  |
|        | $\alpha$ | O8  | 0.95  | 0.56  | 0.00  |
|        | $\alpha$ | Mn1 | 2.92  | 2.56  | 1.98  |
|        | $\alpha$ | Mn2 | 2.92  | 2.93  | 2.94  |
|        | $\alpha$ | Mn3 | 2.78  | 2.72  | 2.79  |
|        | $\beta$  | Mn4 | -2.84 | -2.84 | -2.84 |
|        | $\beta$  | O8  | -0.96 | -0.49 | 0.00  |
|        | $\alpha$ | Mn1 | 2.92  | 2.84  | 2.94  |
|        | $\alpha$ | Mn2 | 2.94  | 2.93  | 2.90  |
|        | $\beta$  | Mn3 | -2.73 | -3.20 | -3.78 |
|        | $\alpha$ | Mn4 | 2.85  | 2.85  | 2.78  |
| sextet | $\beta$  | O8  | -0.88 | -0.56 | 0.00  |
|        | $\alpha$ | Mn1 | 2.92  | 2.55  | 1.97  |
|        | $\beta$  | Mn2 | -2.94 | -2.95 | -2.93 |
|        | $\alpha$ | Mn3 | 2.81  | 2.73  | 2.81  |
|        | $\alpha$ | Mn4 | 2.92  | 2.91  | 2.91  |
|        | $\beta$  | O8  | -0.96 | -0.48 | 0.00  |
|        | $\beta$  | Mn1 | -2.91 | -3.28 | -3.88 |
|        | $\alpha$ | Mn2 | 2.92  | 2.92  | 2.89  |
|        | $\alpha$ | Mn3 | 2.83  | 2.74  | 2.86  |
|        | $\alpha$ | Mn4 | 2.92  | 2.92  | 2.93  |
|        | $\beta$  | O8  | -0.88 | -0.62 | -0.01 |
|        | $\alpha$ | Mn1 | 2.92  | 3.24  | 3.87  |
|        | $\alpha$ | Mn2 | 2.92  | 2.93  | 2.95  |
|        | $\alpha$ | Mn3 | 2.80  | 2.96  | 2.86  |
|        | $\beta$  | Mn4 | -2.91 | -2.83 | -2.84 |
|        | $\alpha$ | O8  | 0.89  | 0.62  | 0.01  |
| octet  | $\alpha$ | Mn1 | 2.92  | 3.32  | 3.87  |
|        | $\alpha$ | Mn2 | 2.95  | 2.95  | 2.97  |
|        | $\beta$  | Mn3 | -2.71 | -2.63 | -2.75 |
|        | $\alpha$ | Mn4 | 2.83  | 2.84  | 2.84  |
|        | $\alpha$ | O8  | 0.96  | 0.61  | 0.02  |
|        | $\alpha$ | Mn1 | 2.92  | 3.20  | 3.87  |

|       |          |     |       |       |       |
|-------|----------|-----|-------|-------|-------|
|       | $\beta$  | Mn2 | -2.94 | -2.93 | -2.90 |
|       | $\alpha$ | Mn3 | 2.81  | 2.98  | 2.88  |
|       | $\alpha$ | Mn4 | 2.91  | 2.91  | 2.92  |
|       | $\alpha$ | O8  | 0.95  | 0.64  | 0.01  |
|       | $\beta$  | Mn1 | -2.91 | -2.83 | -2.87 |
|       | $\alpha$ | Mn2 | 2.92  | 2.92  | 2.93  |
|       | $\alpha$ | Mn3 | 2.82  | 3.33  | 3.86  |
|       | $\alpha$ | Mn4 | 2.91  | 2.92  | 2.92  |
|       | $\alpha$ | O8  | 0.95  | 0.55  | 0.00  |
| 12-et | $\alpha$ | Mn1 | 2.92  | 2.56  | 1.98  |
|       | $\alpha$ | Mn2 | 2.92  | 2.93  | 2.94  |
|       | $\alpha$ | Mn3 | 2.85  | 2.78  | 2.85  |
|       | $\alpha$ | Mn4 | 2.92  | 2.91  | 2.91  |
|       | $\beta$  | O8  | -0.95 | -0.48 | 0.00  |
| 14-et | $\alpha$ | Mn1 | 2.92  | 3.23  | 3.87  |
|       | $\alpha$ | Mn2 | 2.92  | 2.93  | 2.95  |
|       | $\alpha$ | Mn3 | 2.85  | 3.06  | 2.92  |
|       | $\alpha$ | Mn4 | 2.91  | 2.91  | 2.91  |
|       | $\beta$  | O8  | 0.95  | 0.62  | 0.01  |

**Rea:**

|    |             |             |             |   |             |             |             |
|----|-------------|-------------|-------------|---|-------------|-------------|-------------|
| Ca | -2.62363600 | 0.52349800  | -0.85126000 | H | -4.05948400 | 4.83323700  | -2.27479500 |
| Mn | -0.28675600 | -1.82750800 | -0.24778500 | H | -4.09918800 | 5.05694100  | -0.53781000 |
| Mn | -1.46328400 | -1.00094200 | 2.01589600  | C | -2.92415100 | 6.56510400  | -1.58731000 |
| Mn | 0.19508700  | 0.81393800  | 0.74208000  | H | -2.28606000 | 6.64706500  | -2.47483600 |
| Mn | 0.58438700  | 3.62759900  | -1.04640500 | H | -2.31807700 | 6.86838800  | -0.72554100 |
| O  | -1.95331000 | -1.68635800 | 0.41060700  | H | -3.76074100 | 7.27113300  | -1.69205200 |
| O  | 0.28868800  | -1.09439300 | 1.34539400  | O | -0.93171800 | -2.67542200 | -1.89360500 |
| O  | -1.54115100 | 0.64795000  | 1.36008700  | C | -2.05890900 | -2.48380800 | -2.49155800 |
| O  | -0.22112000 | -0.12187400 | -0.82536800 | O | -2.84288500 | -1.53362500 | -2.29232900 |
| O  | -0.10134100 | 2.38863000  | 0.13035200  | C | -2.38630600 | -3.54725700 | -3.54276800 |
| O  | -5.00711900 | 0.03563600  | -1.69565900 | H | -1.55742700 | -3.55112000 | -4.26754500 |
| H  | -5.25651400 | -0.22832500 | -0.78515400 | H | -2.34295300 | -4.52717200 | -3.04335700 |
| H  | -4.66334900 | -0.77478100 | -2.12523400 | C | -3.72528500 | -3.35359200 | -4.25743500 |
| O  | -1.92480100 | 1.45304800  | -3.04811000 | H | -3.74995800 | -2.35303000 | -4.70963900 |
| H  | -0.99220400 | 1.87923700  | -2.87814900 | H | -4.53685700 | -3.37054900 | -3.51589300 |
| O  | 1.34579400  | 4.83797600  | -2.19050900 | C | -3.98108800 | -4.42088800 | -5.32781800 |
| H  | 1.51458600  | 5.60064700  | -1.60548700 | H | -3.20079600 | -4.40354000 | -6.10240300 |
| O  | 0.90939900  | 4.81072800  | 0.33056800  | H | -4.94756400 | -4.26409500 | -5.82585500 |
| H  | 0.56225100  | 4.35118800  | 1.11704400  | H | -3.98984000 | -5.43092800 | -4.89278900 |
| H  | 0.64045800  | 3.10890300  | -3.29152400 | N | 1.61678500  | -2.17887500 | -1.00754200 |
| O  | -2.76901500 | 2.87857500  | -1.07279800 | C | 2.22343100  | -1.42395600 | -1.98828200 |
| C  | -2.36817100 | 4.05128700  | -1.25370200 | H | 1.71802100  | -0.55818100 | -2.39875900 |
| O  | -1.16387700 | 4.47475500  | -1.33148100 | C | 3.46733100  | -1.94550600 | -2.25251900 |
| C  | -3.44220300 | 5.13736300  | -1.41642500 | N | 3.59104200  | -3.04933700 | -1.40997600 |

|   |             |             |             |   |             |             |             |
|---|-------------|-------------|-------------|---|-------------|-------------|-------------|
| H | 4.48533200  | -3.47312900 | -1.16418500 | C | -0.47060600 | -5.23527200 | 2.47166800  |
| C | 2.46148400  | -3.13513300 | -0.66425700 | H | 0.58599600  | -5.52390900 | 2.37038700  |
| H | 2.27482800  | -3.87725500 | 0.09882100  | H | -1.02423300 | -5.90054600 | 1.79216300  |
| C | 4.51879300  | -1.52293900 | -3.24253200 | H | -5.79200700 | -1.91219600 | 2.95992700  |
| H | 4.30368900  | -1.94332200 | -4.23746700 | C | -0.95099700 | -5.40204100 | 3.91311200  |
| H | 4.44435200  | -0.43342700 | -3.35916200 | H | -0.82527500 | -6.44233300 | 4.24385100  |
| C | 5.97798500  | -1.91595700 | -2.88085800 | H | -0.38869800 | -4.75132600 | 4.59316900  |
| H | 6.14341200  | -2.98389000 | -3.06320900 | H | -2.00894400 | -5.13197400 | 4.00735100  |
| H | 6.66443700  | -1.36168900 | -3.53633000 | O | -4.36111500 | -0.12044900 | 0.93079100  |
| C | 6.29585200  | -1.67009800 | -1.40739000 | C | -4.31914700 | -0.61485000 | 2.07707800  |
| O | 6.28502800  | -2.59756900 | -0.58941600 | O | -3.25988100 | -0.99282300 | 2.71186600  |
| N | 6.52028800  | -0.37262200 | -1.05886800 | C | -5.60973700 | -0.83404600 | 2.85709300  |
| H | 6.40355000  | 0.32083300  | -1.78899200 | H | -6.45472200 | -0.36753800 | 2.34213200  |
| C | 6.35558400  | 0.09945000  | 0.32145100  | H | -5.50973000 | -0.42258400 | 3.86835100  |
| H | 6.70492500  | -0.70895600 | 0.97063800  | O | -0.68188600 | -0.25387900 | 3.70026900  |
| H | 7.01960700  | 0.96313900  | 0.46357200  | C | 0.15113600  | 0.71456500  | 3.69149000  |
| C | 4.89364900  | 0.45754400  | 0.64530200  | O | 0.65449800  | 1.29205100  | 2.68218800  |
| H | 4.26854100  | -0.43323300 | 0.51446700  | C | 0.55539800  | 1.24653000  | 5.06551400  |
| H | 4.82427700  | 0.72844800  | 1.70843900  | H | -0.17283400 | 2.03421700  | 5.32117600  |
| C | 4.34567900  | 1.59779900  | -0.21729500 | H | 0.41061700  | 0.44001700  | 5.79576800  |
| H | 4.57330300  | 1.42947100  | -1.28161100 | C | 1.97741500  | 1.81531400  | 5.13334600  |
| H | 4.81124600  | 2.55931400  | 0.03841100  | H | 2.08470800  | 2.59552100  | 4.36978000  |
| C | 2.82287400  | 1.80395400  | -0.17248300 | H | 2.69495000  | 1.02488100  | 4.86621900  |
| O | 2.14542800  | 0.89220300  | 0.40101400  | C | 2.31822300  | 2.37698100  | 6.51813900  |
| O | 2.43436200  | 2.85076400  | -0.74853400 | H | 1.63541500  | 3.19330600  | 6.79468900  |
| O | -0.13999600 | -3.65724200 | 0.72779100  | H | 3.34142700  | 2.77585700  | 6.54600700  |
| C | -0.60642500 | -3.81870400 | 1.90612300  | H | 2.23979800  | 1.60390200  | 7.29638200  |
| O | -1.16463000 | -2.95152500 | 2.64133700  | O | 0.38776300  | 2.49797000  | -2.57467900 |

**TS:**

|    |             |             |             |   |             |            |             |
|----|-------------|-------------|-------------|---|-------------|------------|-------------|
| Ca | -2.57679600 | 1.00496400  | -0.58165200 | O | 2.12369100  | 4.93360700 | -1.50681500 |
| Mn | -0.69133600 | -1.85959300 | -0.40260900 | H | 2.21963900  | 5.62885400 | -0.82811500 |
| Mn | -1.46874400 | -0.95579900 | 2.01123200  | O | 1.27119000  | 4.69828200 | 0.89392000  |
| Mn | 0.35356200  | 0.70443000  | 0.73321100  | H | 0.82257000  | 4.16658700 | 1.57671900  |
| Mn | 1.14178900  | 3.66942800  | -0.62788400 | H | 1.24802300  | 3.33533700 | -2.92904300 |
| O  | -2.22149200 | -1.42491500 | 0.44346400  | O | -2.35216300 | 3.34153200 | -0.78135000 |
| O  | 0.16631700  | -1.25392700 | 1.14126700  | C | -1.75707800 | 4.39024000 | -1.11323500 |
| O  | -1.32435100 | 0.74133600  | 1.48406600  | O | -0.49846800 | 4.62166200 | -1.15888100 |
| O  | -0.32832400 | -0.02566200 | -0.89934200 | C | -2.63327900 | 5.58014900 | -1.54365700 |
| O  | 0.22826700  | 2.35163800  | 0.29109200  | H | -3.21465900 | 5.23792000 | -2.41341600 |
| O  | -5.04644000 | 1.04242500  | -1.27939300 | H | -3.36891600 | 5.72869300 | -0.73977400 |
| H  | -5.28288900 | 0.77965300  | -0.36433900 | C | -1.89104500 | 6.87891500 | -1.85703900 |
| H  | -4.90029600 | 0.20262800  | -1.76441100 | H | -1.16651500 | 6.73255400 | -2.66634500 |
| O  | -0.86790700 | 1.00526200  | -2.36674900 | H | -1.32990100 | 7.22980500 | -0.98290100 |
| H  | -0.08449100 | 1.65753400  | -2.30780100 | H | -2.59688800 | 7.66703000 | -2.15746900 |



|   |             |             |             |   |             |             |             |
|---|-------------|-------------|-------------|---|-------------|-------------|-------------|
| O | -1.65584700 | -2.38915200 | -2.03197000 | C | 4.53612700  | 1.05954900  | -0.27070300 |
| C | -2.74187200 | -1.89491700 | -2.51822100 | H | 4.62398400  | 0.96993800  | -1.36643400 |
| O | -3.30825700 | -0.84548000 | -2.14550100 | H | 5.18246200  | 1.89670800  | 0.02074600  |
| C | -3.32744600 | -2.71440600 | -3.67173900 | C | 3.07998200  | 1.48878800  | -0.04666400 |
| H | -2.56462700 | -2.73885200 | -4.46561400 | O | 2.24834300  | 0.54856600  | 0.16800200  |
| H | -3.42240400 | -3.75413500 | -3.32415200 | O | 2.87522200  | 2.72566600  | -0.15143900 |
| C | -4.65709300 | -2.19525700 | -4.22256000 | O | -0.76289000 | -3.77039000 | 0.54240900  |
| H | -4.53396200 | -1.14781000 | -4.52922600 | C | -1.13668600 | -3.87467700 | 1.75405300  |
| H | -5.40550400 | -2.18912900 | -3.41688900 | O | -1.45421600 | -2.93441700 | 2.54754300  |
| C | -5.17343500 | -3.02990600 | -5.40031300 | C | -1.22109100 | -5.30208800 | 2.30398600  |
| H | -4.45820900 | -3.02546400 | -6.23550300 | H | -0.27406100 | -5.80174600 | 2.05365100  |
| H | -6.12884500 | -2.64110200 | -5.77836500 | H | -1.99215300 | -5.81944500 | 1.71293100  |
| H | -5.33175400 | -4.07848900 | -5.10911800 | H | -5.82926000 | -1.15291200 | 3.26676000  |
| N | 1.06060300  | -2.43785500 | -1.34636000 | C | -1.52207800 | -5.40382900 | 3.79928400  |
| C | 1.69398500  | -1.71244000 | -2.33230400 | H | -1.57467000 | -6.45590800 | 4.11245300  |
| H | 1.24509200  | -0.80383800 | -2.71389600 | H | -0.74618100 | -4.90470300 | 4.39212800  |
| C | 2.88879300  | -2.31815900 | -2.63770600 | H | -2.47505500 | -4.91972800 | 4.04056700  |
| N | 2.95335500  | -3.44321200 | -1.81728700 | O | -4.24859300 | 0.51917500  | 1.27413600  |
| H | 3.81601200  | -3.95136500 | -1.61887100 | C | -4.19804800 | -0.06915100 | 2.37709200  |
| C | 1.84201400  | -3.46029100 | -1.04170600 | O | -3.17726200 | -0.67613600 | 2.88011200  |
| H | 1.62674700  | -4.19475600 | -0.27848700 | C | -5.44050300 | -0.12556900 | 3.25816400  |
| C | 3.94892100  | -1.93567200 | -3.63544200 | H | -6.21210600 | 0.55172600  | 2.88007500  |
| H | 3.64813800  | -2.23537400 | -4.65155100 | H | -5.18102000 | 0.13407200  | 4.29096200  |
| H | 4.00591900  | -0.83877700 | -3.65512600 | O | -0.41500600 | -0.46522000 | 3.65968500  |
| C | 5.36016700  | -2.52917900 | -3.38174800 | C | 0.56016700  | 0.35047400  | 3.62204800  |
| H | 5.37594600  | -3.59655800 | -3.63028900 | O | 1.05772900  | 0.91755400  | 2.59788700  |
| H | 6.07518000  | -2.02727200 | -4.04885000 | C | 1.18649700  | 0.71180900  | 4.96710100  |
| C | 5.79928500  | -2.41812200 | -1.92260700 | H | 0.65632000  | 1.60938400  | 5.32649200  |
| O | 5.71832200  | -3.38747200 | -1.15736000 | H | 0.95310200  | -0.09439400 | 5.67412300  |
| N | 6.22702300  | -1.19035400 | -1.52103300 | C | 2.69339300  | 0.99134000  | 4.91229500  |
| H | 6.15751100  | -0.43552600 | -2.19398300 | H | 2.88102400  | 1.78349800  | 4.17716100  |
| C | 6.28643100  | -0.81171300 | -0.10460600 | H | 3.21279900  | 0.09543500  | 4.53961800  |
| H | 6.55695700  | -1.71799400 | 0.44536600  | C | 3.26423500  | 1.38886200  | 6.27806200  |
| H | 7.09945700  | -0.08250900 | 0.01639600  | H | 2.78463900  | 2.30247000  | 6.65780100  |
| C | 4.95037000  | -0.24848200 | 0.41037200  | H | 4.34412200  | 1.58104100  | 6.21793600  |
| H | 4.16380700  | -0.99780800 | 0.26458800  | H | 3.10659600  | 0.59801000  | 7.02582200  |
| H | 5.03391000  | -0.09005400 | 1.49574000  | O | 1.14181100  | 2.65958600  | -2.23656300 |

**Pro:**

|    |             |             |             |   |             |             |             |
|----|-------------|-------------|-------------|---|-------------|-------------|-------------|
| Ca | -2.70680500 | 0.93064200  | -0.47594500 | O | 0.20971200  | -1.22765800 | 1.00366900  |
| Mn | -0.73978100 | -2.00014800 | -0.50397100 | O | -1.25852700 | 0.74381100  | 1.41106700  |
| Mn | -1.35482400 | -0.97615900 | 1.93068900  | O | -0.11442700 | 0.12948600  | -1.04325500 |
| Mn | 0.41591800  | 0.76917600  | 0.68322000  | O | 0.30518600  | 2.44575900  | 0.33939000  |
| Mn | 1.09526400  | 3.73809700  | -0.69945300 | O | -5.17906900 | 0.94025900  | -1.12531100 |
| O  | -2.19925700 | -1.43430700 | 0.40068600  | H | -5.37816300 | 0.65009600  | -0.20866600 |

|   |             |             |             |   |             |             |             |
|---|-------------|-------------|-------------|---|-------------|-------------|-------------|
| H | -5.03175600 | 0.12022900  | -1.64202700 | H | 6.10465200  | -2.16076300 | -4.05898700 |
| O | -0.81101200 | 0.95247600  | -2.00812100 | C | 5.84201100  | -2.36168500 | -1.90705000 |
| H | -0.10909000 | 1.73944800  | -2.18469300 | O | 5.76010500  | -3.25152100 | -1.05027700 |
| O | 1.92698300  | 5.00272600  | -1.72467600 | N | 6.28343500  | -1.10579100 | -1.62873600 |
| H | 2.08384100  | 5.72341600  | -1.08533700 | H | 6.21595300  | -0.41609800 | -2.36825600 |
| O | 1.39298800  | 4.79186200  | 0.76953900  | C | 6.38740500  | -0.60276700 | -0.25388200 |
| H | 1.02404300  | 4.26804100  | 1.50486500  | H | 6.70531400  | -1.44939000 | 0.36213500  |
| H | 0.78250200  | 3.38182500  | -3.00623400 | H | 7.18455700  | 0.15305900  | -0.23377300 |
| O | -2.40059100 | 3.23929600  | -0.80733600 | C | 5.05940400  | -0.03011400 | 0.26936400  |
| C | -1.87080000 | 4.36165900  | -0.97044700 | H | 4.29021700  | -0.80955500 | 0.22530500  |
| O | -0.62837200 | 4.66215700  | -1.03040200 | H | 5.18488700  | 0.22385200  | 1.33222500  |
| C | -2.82181900 | 5.56042000  | -1.13680000 | C | 4.57455000  | 1.20209500  | -0.50089100 |
| H | -3.49414700 | 5.31395300  | -1.97218600 | H | 4.61190800  | 1.01730400  | -1.58749600 |
| H | -3.46062500 | 5.57081000  | -0.24091500 | H | 5.20778100  | 2.07864300  | -0.31574600 |
| C | -2.15430200 | 6.91908400  | -1.34710900 | C | 3.11684000  | 1.60336000  | -0.23002000 |
| H | -1.52881400 | 6.91554200  | -2.24759800 | O | 2.33767600  | 0.66466000  | 0.11838700  |
| H | -1.50099300 | 7.16827000  | -0.50301400 | O | 2.86767000  | 2.82345000  | -0.43571600 |
| H | -2.90998700 | 7.71131300  | -1.45090300 | O | -0.70009800 | -3.90192800 | 0.62282500  |
| O | -1.78043900 | -2.42546900 | -2.12603900 | C | -1.04333900 | -3.91192700 | 1.84138200  |
| C | -2.87475100 | -1.89919300 | -2.55186800 | O | -1.34190100 | -2.90535500 | 2.56221300  |
| O | -3.37779600 | -0.82102000 | -2.16211400 | C | -1.12689300 | -5.28456600 | 2.51925900  |
| C | -3.56252500 | -2.70694900 | -3.65639000 | H | -0.21886800 | -5.83857300 | 2.24142700  |
| H | -2.85053100 | -2.77523500 | -4.49389800 | H | -1.95864700 | -5.82006800 | 2.03555700  |
| H | -3.67755800 | -3.73703200 | -3.28696700 | H | -5.80046300 | -1.25584100 | 3.24052500  |
| C | -4.90130900 | -2.14320800 | -4.13670900 | C | -1.31555600 | -5.25195200 | 4.03618100  |
| H | -4.75824000 | -1.10407500 | -4.46262800 | H | -1.37950500 | -6.27159400 | 4.44177800  |
| H | -5.60180600 | -2.10131500 | -3.28991600 | H | -0.47965200 | -4.73747600 | 4.52583500  |
| C | -5.51597900 | -2.96965200 | -5.27233400 | H | -2.22928600 | -4.71022000 | 4.30445800  |
| H | -4.85085700 | -3.00069400 | -6.14742100 | O | -4.26924500 | 0.45190300  | 1.38407400  |
| H | -6.47665800 | -2.54889300 | -5.59910700 | C | -4.12439000 | -0.15005700 | 2.47912700  |
| H | -5.69572200 | -4.00839800 | -4.95947400 | O | -3.05561000 | -0.70755400 | 2.91005900  |
| N | 1.01841200  | -2.58450600 | -1.45934900 | C | -5.32672000 | -0.27823400 | 3.40895300  |
| C | 1.64642900  | -1.91667300 | -2.48840700 | H | -6.06034900 | 0.50693600  | 3.19969800  |
| H | 1.16131700  | -1.08775700 | -2.98601900 | H | -5.00943800 | -0.23849100 | 4.45620100  |
| C | 2.90291100  | -2.44124500 | -2.67197200 | O | -0.31829000 | -0.48341800 | 3.58976500  |
| N | 3.01458600  | -3.46113900 | -1.73041500 | C | 0.65352400  | 0.33344400  | 3.56784200  |
| H | 3.90246600  | -3.88310600 | -1.45178500 | O | 1.14441900  | 0.92077500  | 2.55303500  |
| C | 1.86763100  | -3.49538100 | -1.01023900 | C | 1.28651400  | 0.66737200  | 4.91759700  |
| H | 1.67360300  | -4.15548200 | -0.17638000 | H | 0.79152900  | 1.58427600  | 5.27814500  |
| C | 3.98090100  | -2.06473900 | -3.65394600 | H | 1.02271800  | -0.13193500 | 5.62150900  |
| H | 3.71220800  | -2.40789300 | -4.66509800 | C | 2.80326700  | 0.88963600  | 4.86505100  |
| H | 4.01561100  | -0.96779100 | -3.71284600 | H | 3.02051100  | 1.67441300  | 4.12999000  |
| C | 5.39820800  | -2.61188500 | -3.34792200 | H | 3.28891700  | -0.02496600 | 4.49224300  |
| H | 5.42923300  | -3.69693500 | -3.50044000 | C | 3.38839800  | 1.26484100  | 6.23107700  |

|   |            |            |            |   |            |            |             |
|---|------------|------------|------------|---|------------|------------|-------------|
| H | 2.94307600 | 2.19548100 | 6.61140300 | H | 3.20061500 | 0.48003200 | 6.97821300  |
| H | 4.47495800 | 1.41620900 | 6.17206200 | O | 0.90460700 | 2.70577800 | -2.31753300 |

**Table S35** Reaction parameters for W3 (water) deprotonation in the open-cubane structure:

| Spin state | Spin topology<br>(Mn1~Mn4-O8)    | Gibbs Free energy (a.u.) |            |            |
|------------|----------------------------------|--------------------------|------------|------------|
|            |                                  | Rea                      | TS         | Pro        |
| doublet    | $\alpha\alpha\beta\alpha$        | -3595.4884               | -3595.4578 | -3595.4585 |
|            | $\alpha\beta\alpha\beta$         | -3595.4880               | -3595.4542 | -3595.4591 |
|            | $\alpha\beta\beta\alpha$         | -3595.4800               | -3595.4519 | -3595.4589 |
|            | $\beta\alpha\alpha\beta$         | -3595.4881               | -3595.4544 | -3595.4604 |
|            | $\beta\alpha\beta\alpha$         | -3595.4800               | -3595.4513 | -3595.4606 |
|            | $\beta\beta\alpha\alpha$         | -3595.4792               | -3595.4506 | -3595.4600 |
| sextet     | $\alpha\alpha\alpha\beta\beta$   | -3595.4813               | -3595.4529 | -3595.4616 |
|            | $\alpha\alpha\beta\alpha\beta$   | -3595.4894               | -3595.4555 | -3595.4615 |
|            | $\alpha\beta\alpha\alpha\beta$   | -3595.4895               | -3595.4596 | -3595.4613 |
|            | $\beta\alpha\alpha\alpha\beta$   | -3595.4892               | -3595.4590 | -3595.4596 |
| octet      | $\alpha\alpha\alpha\beta\alpha$  | -3595.4898               | -3595.4560 | -3595.4604 |
|            | $\alpha\alpha\beta\alpha\alpha$  | -3595.4815               | -3595.4531 | -3595.4603 |
|            | $\alpha\beta\alpha\alpha\alpha$  | -3595.4806               | -3595.4520 | -3595.4601 |
|            | $\beta\alpha\alpha\alpha\alpha$  | -3595.4803               | -3595.4518 | -3595.4613 |
| 12-et      | $\alpha\alpha\alpha\alpha\beta$  | -3595.4865               | -3595.4523 | -3595.4606 |
| 14-et      | $\alpha\alpha\alpha\alpha\alpha$ | -3595.4815               | -3595.4529 | -3595.4608 |

| Spin state | Spin topology<br>(Mn1~Mn4-O8)    | Relative Gibbs Free energy (kcal/mol) |                            |                        |                        |
|------------|----------------------------------|---------------------------------------|----------------------------|------------------------|------------------------|
|            |                                  | $\Delta G^\ddagger(\text{Rea-TS})$    | $\Delta G(\text{Rea-Pro})$ | $\Delta G(\text{Rea})$ | $\Delta G(\text{Pro})$ |
| doublet    | $\alpha\alpha\beta\beta\alpha$   | 19.2                                  | 18.8                       | 0.9                    | 1.9                    |
|            | $\alpha\beta\alpha\beta\alpha$   | 21.2                                  | 18.1                       | 1.1                    | 1.6                    |
|            | $\alpha\beta\beta\alpha\alpha$   | 17.6                                  | 13.2                       | 6.1                    | 1.7                    |
|            | $\beta\alpha\alpha\beta\alpha$   | 21.1                                  | 17.4                       | 1.1                    | 0.8                    |
|            | $\beta\alpha\beta\alpha\alpha$   | 18.0                                  | 12.2                       | 6.1                    | 0.6                    |
|            | $\beta\beta\alpha\alpha\alpha$   | 17.9                                  | 12.0                       | 6.7                    | 1.0                    |
| sextet     | $\alpha\alpha\alpha\beta\beta$   | 17.8                                  | 12.4                       | 5.3                    | 0.0                    |
|            | $\alpha\alpha\beta\alpha\beta$   | 21.3                                  | 17.5                       | 0.3                    | 0.1                    |
|            | $\alpha\beta\alpha\alpha\beta$   | 18.8                                  | 17.7                       | 0.2                    | 0.2                    |
|            | $\beta\alpha\alpha\alpha\beta$   | 19.0                                  | 18.6                       | 0.4                    | 1.3                    |
| octet      | $\alpha\alpha\alpha\beta\alpha$  | 21.2                                  | 18.4                       | 0.0                    | 0.8                    |
|            | $\alpha\alpha\beta\alpha\alpha$  | 17.8                                  | 13.3                       | 5.2                    | 0.8                    |
|            | $\alpha\beta\alpha\alpha\alpha$  | 17.9                                  | 12.9                       | 5.8                    | 0.9                    |
|            | $\beta\alpha\alpha\alpha\alpha$  | 17.9                                  | 11.9                       | 6.0                    | 0.2                    |
| 12-et      | $\alpha\alpha\alpha\alpha\beta$  | 21.5                                  | 16.3                       | 2.1                    | 0.6                    |
| 14-et      | $\alpha\alpha\alpha\alpha\alpha$ | 17.9                                  | 13.0                       | 5.2                    | 0.5                    |

**Rea:**

|    |             |             |             |   |             |             |             |
|----|-------------|-------------|-------------|---|-------------|-------------|-------------|
| Ca | -1.73182100 | -1.75721700 | -1.27594400 | C | 3.94785500  | -4.30737100 | -1.28704300 |
| Mn | 1.28316000  | -1.38282800 | 0.36864300  | H | 4.67075300  | -3.48149100 | -1.34057800 |
| Mn | -0.96847400 | -1.26021100 | 1.97005900  | H | 4.21638400  | -4.87683800 | -0.38268400 |
| Mn | -1.21330000 | 1.12182400  | 0.50411800  | C | 4.03297200  | -5.20440200 | -2.52558000 |
| Mn | -2.27280900 | 2.14814600  | -1.75486800 | H | 3.74047500  | -4.62073700 | -3.41185800 |
| O  | -0.17486400 | -2.35620700 | 0.75579100  | H | 3.29433900  | -6.01150800 | -2.43447800 |
| O  | -2.11872300 | -0.39768800 | 0.85276200  | C | 5.43413600  | -5.78988300 | -2.73093800 |
| O  | 0.27738900  | -0.03626100 | 1.25383600  | H | 6.18565800  | -4.99743600 | -2.85407900 |
| O  | -2.52508000 | 2.23693400  | 0.01081400  | H | 5.73855200  | -6.40287200 | -1.87103100 |
| O  | -1.24996100 | 0.77075900  | -1.32694800 | H | 5.47245500  | -6.42754200 | -3.62385500 |
| O  | -1.16099900 | -4.15863700 | -1.46818400 | N | 2.81557000  | 0.03406900  | 0.12941600  |
| H  | -0.18062100 | -4.21026100 | -1.34759400 | C | 3.43781300  | 0.54970000  | -0.99083600 |
| H  | -1.55160400 | -4.40792400 | -0.61009000 | H | 3.21651900  | 0.18212400  | -1.98615700 |
| O  | -1.37969600 | -1.96159900 | -3.69860600 | C | 4.29187500  | 1.55922500  | -0.60998200 |
| H  | -0.61231900 | -2.54455500 | -3.90043800 | N | 4.18091400  | 1.62859500  | 0.77325300  |
| O  | -2.05381500 | 2.23914800  | -3.66243900 | H | 4.56096600  | 2.38580400  | 1.34816800  |
| H  | -1.03193800 | 1.12152500  | -4.28091100 | C | 3.27374100  | 0.71260900  | 1.17260300  |
| O  | -3.48058800 | 3.93599400  | -2.13940800 | H | 2.95637300  | 0.56936300  | 2.19378200  |
| H  | -4.34746100 | 3.48210900  | -2.11881300 | C | 5.18467300  | 2.44823800  | -1.43879900 |
| H  | -3.22515600 | 3.91928500  | -3.08759500 | H | 5.99263000  | 1.85306100  | -1.88933100 |
| O  | -0.44703100 | 0.42768100  | -4.72818000 | H | 4.59764500  | 2.83467500  | -2.28449300 |
| H  | -1.15088600 | -1.10874700 | -4.14302600 | C | 5.84800100  | 3.63248900  | -0.69077400 |
| H  | -0.54134300 | 0.58876900  | -5.68164200 | H | 6.60084400  | 3.26428700  | 0.01516100  |
| O  | 1.91834100  | -0.53661200 | -3.60660900 | H | 6.36998400  | 4.25706400  | -1.42889000 |
| H  | 1.16209300  | -0.04803100 | -4.01446300 | C | 4.86120200  | 4.46627500  | 0.12540100  |
| H  | 1.79723400  | -1.46191200 | -3.92086700 | O | 4.74376600  | 4.30916900  | 1.34828400  |
| O  | 1.11817900  | -3.18815900 | -4.10010800 | N | 4.07994500  | 5.33529800  | -0.56645700 |
| H  | 1.27246400  | -3.88612200 | -4.75778500 | H | 4.19363100  | 5.39354700  | -1.57095000 |
| H  | 1.28084700  | -3.61217900 | -3.21427400 | C | 2.92213100  | 5.99333300  | 0.04905400  |
| O  | 0.64746300  | -1.16570300 | -1.29646700 | H | 2.64606000  | 6.83577200  | -0.59755100 |
| H  | 1.23641000  | -0.80758800 | -2.01717000 | H | 3.24608000  | 6.39972600  | 1.01314200  |
| O  | -3.82829800 | -0.86634300 | -1.98152300 | C | 1.72932300  | 5.04597300  | 0.26575600  |
| C  | -4.47405900 | 0.16968700  | -2.17505000 | H | 2.02475400  | 4.24812000  | 0.95517200  |
| O  | -3.98475000 | 1.37662900  | -2.20298800 | H | 0.92790100  | 5.61249700  | 0.76126500  |
| C  | -5.97839000 | 0.07061100  | -2.42820800 | C | 1.20373500  | 4.43287300  | -1.03709400 |
| H  | -6.09686900 | -0.55389800 | -3.32568200 | H | 0.82405700  | 5.19935400  | -1.72392600 |
| H  | -6.38496400 | -0.52631100 | -1.60006000 | H | 2.02008400  | 3.90695400  | -1.55708500 |
| C  | -6.73632200 | 1.38971300  | -2.57658700 | C | 0.10829100  | 3.39315700  | -0.83873700 |
| H  | -6.36221300 | 1.97210700  | -3.42806000 | O | 0.17375200  | 2.62006500  | 0.14866700  |
| H  | -7.80430400 | 1.19982900  | -2.74372700 | O | -0.79445200 | 3.38514800  | -1.75220400 |
| H  | -6.64331900 | 2.00529300  | -1.67277000 | O | 0.25510200  | -1.99955200 | 3.38156400  |
| O  | 2.56527500  | -2.74531600 | -0.18447700 | C | 1.50691300  | -2.08295900 | 3.21986600  |
| C  | 2.56275200  | -3.70553800 | -1.03540900 | O | 2.14429600  | -1.75808500 | 2.16591500  |
| O  | 1.56420700  | -4.17806400 | -1.62987200 | C | 2.34252400  | -2.63488800 | 4.36857500  |

|   |             |             |            |   |             |             |            |
|---|-------------|-------------|------------|---|-------------|-------------|------------|
| H | 3.26422200  | -2.03965900 | 4.41838800 | O | -1.52230000 | -0.07744400 | 3.47341600 |
| H | 2.65817500  | -3.64292500 | 4.05728300 | C | -1.57898700 | 1.18622300  | 3.38725900 |
| C | 1.62573900  | -2.68524000 | 5.71824400 | O | -1.36549100 | 1.86198000  | 2.33193000 |
| H | 2.28515500  | -3.11501800 | 6.48305100 | C | -1.95962600 | 1.97092500  | 4.63334100 |
| H | 1.32781700  | -1.68203300 | 6.04706500 | H | -1.47751800 | 2.95496700  | 4.56655400 |
| H | 0.71745600  | -3.29433900 | 5.65814100 | H | -3.04354600 | 2.15801600  | 4.55676700 |
| O | -2.96971600 | -3.17210900 | 0.40671400 | C | -1.63838800 | 1.27210700  | 5.95929800 |
| C | -3.04632000 | -3.20756500 | 1.65110000 | H | -0.55567000 | 1.08588400  | 6.01692000 |
| O | -2.29731800 | -2.54356900 | 2.47603900 | H | -2.11785300 | 0.28533200  | 5.96973700 |
| C | -4.09773200 | -4.06822200 | 2.33168400 | C | -2.08819400 | 2.09504800  | 7.17137800 |
| H | -4.49011500 | -4.81213100 | 1.63244300 | H | -1.59882600 | 3.07906400  | 7.19377100 |
| H | -3.68412400 | -4.55334300 | 3.22237400 | H | -1.84587000 | 1.58071500  | 8.11038800 |
| H | -4.92210900 | -3.42059800 | 2.66023600 | H | -3.17387500 | 2.26612400  | 7.15579000 |

**TS:**

|    |             |             |             |   |             |             |             |
|----|-------------|-------------|-------------|---|-------------|-------------|-------------|
| Ca | 1.76430900  | 1.71992800  | -1.24085800 | H | -1.28497300 | 1.01302100  | -1.96802500 |
| Mn | -1.22864400 | 1.41179400  | 0.44682000  | O | 3.84823000  | 0.81612500  | -1.96118300 |
| Mn | 1.04026800  | 1.12452500  | 2.00694900  | C | 4.46437900  | -0.23585000 | -2.17542100 |
| Mn | 1.15628600  | -1.20165000 | 0.44393900  | O | 3.94718700  | -1.42738400 | -2.19572900 |
| Mn | 2.16412800  | -2.14524200 | -1.87840200 | C | 5.96763200  | -0.17014000 | -2.44902200 |
| O  | 0.28450100  | 2.29770000  | 0.84581100  | H | 6.09606100  | 0.53537100  | -3.28206400 |
| O  | 2.13673300  | 0.25489100  | 0.84033900  | H | 6.41083600  | 0.32498100  | -1.57320600 |
| O  | -0.26517400 | -0.01779400 | 1.26093300  | C | 6.67007300  | -1.49633300 | -2.73854800 |
| O  | 2.40595100  | -2.36100000 | -0.12734300 | H | 6.25757400  | -1.97940500 | -3.63374600 |
| O  | 1.19803800  | -0.76493400 | -1.37324100 | H | 7.74120300  | -1.33120500 | -2.91187600 |
| O  | 1.35663700  | 4.15888900  | -1.33686500 | H | 6.56944900  | -2.19207700 | -1.89618000 |
| H  | 0.38309300  | 4.25301700  | -1.19229500 | O | -2.43881000 | 2.85302900  | -0.04094800 |
| H  | 1.77892800  | 4.34579800  | -0.47744000 | C | -2.38966200 | 3.83326900  | -0.87015500 |
| O  | 1.30868500  | 1.87837200  | -3.63587400 | O | -1.36848800 | 4.27532600  | -1.44616600 |
| H  | 0.69336800  | 2.61158500  | -3.86667400 | C | -3.74807900 | 4.49602600  | -1.11334800 |
| O  | 1.95294100  | -2.02374500 | -3.79794100 | H | -4.49560000 | 3.69869300  | -1.22927800 |
| H  | 1.31935000  | -1.28428100 | -4.08561800 | H | -4.01836200 | 5.01982300  | -0.18251900 |
| O  | 3.28186200  | -3.90983800 | -2.46215000 | C | -3.77880300 | 5.46403700  | -2.29964800 |
| H  | 4.15228900  | -3.45934100 | -2.48227300 | H | -3.48475800 | 4.92210700  | -3.21128000 |
| H  | 2.98510700  | -3.91126900 | -3.39553900 | H | -3.01847700 | 6.24159500  | -2.14806600 |
| O  | 0.29222900  | -0.13532100 | -4.57973500 | C | -5.15688300 | 6.10389000  | -2.49889200 |
| H  | 0.80701900  | 0.76866500  | -4.21622500 | H | -5.92889000 | 5.34351600  | -2.68253400 |
| H  | 0.33065700  | -0.07783600 | -5.55134900 | H | -5.46143200 | 6.67611100  | -1.61140000 |
| O  | -2.03522500 | 0.88216900  | -3.51777300 | H | -5.15658100 | 6.79226200  | -3.35417700 |
| H  | -1.30027500 | 0.36230900  | -3.93786000 | N | -2.82630600 | 0.07819100  | 0.18916100  |
| H  | -1.86379300 | 1.80395400  | -3.81972900 | C | -3.49369100 | -0.35590200 | -0.93946500 |
| O  | -1.03672700 | 3.46343300  | -4.00982600 | H | -3.28610100 | 0.05994400  | -1.91871700 |
| H  | -1.19319200 | 4.20044400  | -4.62269100 | C | -4.37237500 | -1.35498900 | -0.58867500 |
| H  | -1.13906100 | 3.84683100  | -3.09878500 | N | -4.22966400 | -1.50103600 | 0.78580100  |
| O  | -0.63866000 | 1.21488100  | -1.23205700 | H | -4.62285400 | -2.27338900 | 1.33098900  |

|   |             |             |             |   |             |             |            |
|---|-------------|-------------|-------------|---|-------------|-------------|------------|
| C | -3.28171800 | -0.63815700 | 1.20793000  | C | -2.16340100 | 2.55650300  | 4.51110300 |
| H | -2.93314200 | -0.56087500 | 2.22608200  | H | -3.11022800 | 2.00176500  | 4.55726700 |
| C | -5.31327200 | -2.17079300 | -1.43920800 | H | -2.43839300 | 3.58817400  | 4.24153000 |
| H | -6.10782600 | -1.52632900 | -1.84332000 | C | -1.42186900 | 2.52582300  | 5.84790900 |
| H | -4.75764500 | -2.53652600 | -2.31482500 | H | -2.04775400 | 2.95691800  | 6.63966500 |
| C | -6.00398600 | -3.36564600 | -0.73438500 | H | -1.16433800 | 1.49905800  | 6.13550700 |
| H | -6.72631300 | -3.00578700 | 0.00687400  | H | -0.48795400 | 3.09532400  | 5.79229700 |
| H | -6.56573800 | -3.93280200 | -1.48947300 | O | 3.09374600  | 3.01325800  | 0.49305000 |
| C | -5.03224700 | -4.27578700 | 0.01570400  | C | 3.19255100  | 2.99293400  | 1.73582500 |
| O | -4.88186100 | -4.18508400 | 1.24177200  | O | 2.43248500  | 2.32217500  | 2.54568600 |
| N | -4.30117300 | -5.13840500 | -0.73633800 | C | 4.28644000  | 3.78382700  | 2.43390900 |
| H | -4.43922600 | -5.14297400 | -1.73943900 | H | 4.70569000  | 4.53233900  | 1.75553200 |
| C | -3.16179800 | -5.87602800 | -0.17953000 | H | 3.90109700  | 4.25758000  | 3.34330800 |
| H | -2.93359800 | -6.69365100 | -0.87482700 | H | 5.08368300  | 3.09052800  | 2.73488500 |
| H | -3.48561400 | -6.31933500 | 0.76825500  | O | 1.55946100  | -0.15066900 | 3.45202000 |
| C | -1.92572200 | -4.99256800 | 0.06314300  | C | 1.56260500  | -1.40929200 | 3.30914800 |
| H | -2.17638700 | -4.21819600 | 0.79568700  | O | 1.30901800  | -2.02884100 | 2.22674000 |
| H | -1.14262900 | -5.61696700 | 0.51673500  | C | 1.92318100  | -2.26749400 | 4.51188000 |
| C | -1.39333000 | -4.33825800 | -1.21669300 | H | 1.37797400  | -3.21593300 | 4.41836100 |
| H | -1.05189800 | -5.08445400 | -1.94459200 | H | 2.99042000  | -2.51969300 | 4.39754900 |
| H | -2.19497000 | -3.75698500 | -1.69915700 | C | 1.67964300  | -1.60685600 | 5.87325300 |
| C | -0.25646200 | -3.35025800 | -0.98504100 | H | 0.61308300  | -1.35449200 | 5.96724300 |
| O | -0.29369100 | -2.61301800 | 0.03305700  | H | 2.22202900  | -0.65390800 | 5.91172700 |
| O | 0.63946000  | -3.33987800 | -1.90175800 | C | 2.10429500  | -2.50796200 | 7.03792000 |
| O | -0.12559800 | 1.85783700  | 3.46498400  | H | 1.55269400  | -3.45874000 | 7.03301000 |
| C | -1.37445200 | 2.00951800  | 3.32772800  | H | 1.91857300  | -2.01976000 | 8.00338200 |
| O | -2.04211400 | 1.75756900  | 2.27328300  | H | 3.17587100  | -2.74723000 | 6.98626300 |

**Pro:**

|    |             |             |             |   |             |             |             |
|----|-------------|-------------|-------------|---|-------------|-------------|-------------|
| Ca | -1.70270600 | -1.77546800 | -1.20112100 | H | -1.38748800 | 1.85261100  | -3.86925500 |
| Mn | 1.35561400  | -1.29269800 | 0.31861100  | O | -3.80464300 | 3.58498100  | -2.31634800 |
| Mn | -0.89377800 | -1.28843100 | 1.93698300  | H | -4.63743400 | 3.07308800  | -2.26200800 |
| Mn | -1.31628000 | 1.11961000  | 0.49972600  | H | -3.50056200 | 3.45892900  | -3.24645100 |
| Mn | -2.48578700 | 1.94425400  | -1.79097400 | O | 0.23243100  | 0.81883300  | -4.49791000 |
| O  | -0.06917600 | -2.32322600 | 0.64992800  | H | -0.19818700 | 0.05486500  | -4.02715000 |
| O  | -2.11665200 | -0.47820300 | 0.89345600  | H | -0.02811000 | 0.70475100  | -5.42845400 |
| O  | 0.29978800  | -0.03061000 | 1.22505500  | O | 2.46001400  | -0.55087600 | -3.54748500 |
| O  | -2.68017200 | 2.11815300  | 0.03607900  | H | 1.82907700  | 0.04944900  | -4.01635500 |
| O  | -1.34609400 | 0.68634200  | -1.29924700 | H | 2.32806200  | -1.43274300 | -3.95527800 |
| O  | -1.04320000 | -4.12527700 | -1.62086700 | O | 1.49930900  | -3.17211700 | -4.15471700 |
| H  | -0.06482100 | -4.14931300 | -1.47476500 | H | 1.34038200  | -3.85197700 | -4.83052000 |
| H  | -1.44486500 | -4.46171600 | -0.79697300 | H | 1.62524500  | -3.65715200 | -3.28927100 |
| O  | -0.52392400 | -1.54078900 | -3.32682000 | O | 0.75824900  | -1.02208800 | -1.41104000 |
| H  | 0.14201900  | -2.21679200 | -3.64756500 | H | 1.46061700  | -0.76301200 | -2.06698100 |
| O  | -2.33713300 | 1.87427400  | -3.62401300 | O | -3.74484100 | -1.17124700 | -2.22067500 |

|   |             |             |             |   |             |             |             |
|---|-------------|-------------|-------------|---|-------------|-------------|-------------|
| C | -4.52245100 | -0.19768200 | -2.19876200 | H | 2.13306200  | 7.00084600  | -0.81972600 |
| O | -4.19910000 | 1.02541500  | -1.94296000 | H | 2.64872600  | 6.74316000  | 0.85718900  |
| C | -6.00649100 | -0.44538200 | -2.46942100 | C | 1.27725500  | 5.23055600  | 0.13858900  |
| H | -6.05608100 | -1.05891800 | -3.37952500 | H | 1.58063900  | 4.50908600  | 0.90410700  |
| H | -6.35891800 | -1.09632200 | -1.65551000 | H | 0.41623400  | 5.78098300  | 0.54443800  |
| C | -6.89101900 | 0.79538400  | -2.59011600 | C | 0.86349400  | 4.48617000  | -1.13644600 |
| H | -6.56639700 | 1.43550600  | -3.42105300 | H | 0.46874100  | 5.17095000  | -1.89674200 |
| H | -7.93311900 | 0.50673300  | -2.77867500 | H | 1.74004400  | 3.98135000  | -1.57222100 |
| H | -6.86596400 | 1.39143200  | -1.66994400 | C | -0.17101700 | 3.39149800  | -0.90350600 |
| O | 2.70265500  | -2.57567200 | -0.30603600 | O | -0.03290800 | 2.64638300  | 0.10607600  |
| C | 2.71000900  | -3.58088900 | -1.09870800 | O | -1.08152000 | 3.30515000  | -1.79457400 |
| O | 1.71280700  | -4.08933000 | -1.67280400 | O | 0.38959100  | -2.04618400 | 3.30879000  |
| C | 4.09957600  | -4.18667700 | -1.31276300 | C | 1.63564200  | -2.08609000 | 3.12044300  |
| H | 4.81449800  | -3.35977100 | -1.42490800 | O | 2.23996200  | -1.71363100 | 2.05887600  |
| H | 4.37249700  | -4.68545100 | -0.36881600 | C | 2.52375700  | -2.63492200 | 4.23018900  |
| C | 4.19798400  | -5.17101400 | -2.48200600 | H | 3.41096500  | -1.99005000 | 4.28819000  |
| H | 3.91175500  | -4.65617800 | -3.41154800 | H | 2.89020600  | -3.61006400 | 3.87357600  |
| H | 3.46315800  | -5.97406400 | -2.33772700 | C | 1.83507800  | -2.77668100 | 5.58785400  |
| C | 5.60388000  | -5.76232000 | -2.63181800 | H | 2.53124500  | -3.19819900 | 6.32409000  |
| H | 6.35239400  | -4.97671100 | -2.80599500 | H | 1.48855100  | -1.80504100 | 5.96043900  |
| H | 5.90358900  | -6.30938700 | -1.72699400 | H | 0.96069900  | -3.43272600 | 5.51874600  |
| H | 5.65309700  | -6.46288500 | -3.47563900 | O | -2.80768800 | -3.33962000 | 0.39945300  |
| N | 2.79971600  | 0.22832200  | 0.16388100  | C | -2.84594400 | -3.38824600 | 1.64828400  |
| C | 3.54791100  | 0.73487300  | -0.88024900 | O | -2.13258900 | -2.67164300 | 2.45458700  |
| H | 3.53373200  | 0.27655700  | -1.86140100 | C | -3.80821800 | -4.33576600 | 2.34497400  |
| C | 4.21437500  | 1.86126100  | -0.45519700 | H | -4.13842900 | -5.11810000 | 1.65541900  |
| N | 3.86734700  | 2.00650000  | 0.88240700  | H | -3.34523700 | -4.77349800 | 3.23568700  |
| H | 4.09507900  | 2.82102100  | 1.46032900  | H | -4.68589200 | -3.76294400 | 2.67463100  |
| C | 3.00602200  | 1.02165500  | 1.20759600  | O | -1.43381200 | -0.16782700 | 3.47036900  |
| H | 2.52501500  | 0.92132600  | 2.16822100  | C | -1.57226600 | 1.09492000  | 3.40738800  |
| C | 5.10012600  | 2.81647200  | -1.21565800 | O | -1.42260400 | 1.80070000  | 2.36455100  |
| H | 6.00005700  | 2.29187100  | -1.56817900 | C | -1.97617700 | 1.82337700  | 4.67999600  |
| H | 4.56814800  | 3.13163000  | -2.12548000 | H | -1.57318400 | 2.84274900  | 4.62083900  |
| C | 5.57100400  | 4.07292400  | -0.44155000 | H | -3.07302900 | 1.92682700  | 4.63520500  |
| H | 6.26576800  | 3.79106100  | 0.35749200  | C | -1.56715800 | 1.12746500  | 5.98327400  |
| H | 6.12029700  | 4.71959900  | -1.13986100 | H | -0.47209900 | 1.02415000  | 6.01028500  |
| C | 4.43689300  | 4.84812100  | 0.23079400  | H | -1.96986100 | 0.10690400  | 5.98621000  |
| O | 4.21122900  | 4.73200200  | 1.44371200  | C | -2.04579700 | 1.89164500  | 7.22251000  |
| N | 3.65853300  | 5.61675000  | -0.57201900 | H | -1.63278400 | 2.90986700  | 7.25179400  |
| H | 3.86678700  | 5.65318800  | -1.56221200 | H | -1.73974700 | 1.38095100  | 8.14477000  |
| C | 2.41921200  | 6.23628300  | -0.08665400 | H | -3.14138100 | 1.97880500  | 7.23767800  |

**Table S36** Reaction parameters for W3 (water) deprotonation in the closed-cubane structure:

| Spin state | Spin | Gibbs Free energy (a.u.) |
|------------|------|--------------------------|
|------------|------|--------------------------|

|         | topology<br>(Mn1~Mn4-O8)         | Rea        | TS         | Pro        |
|---------|----------------------------------|------------|------------|------------|
| doublet | $\alpha\alpha\beta\beta\alpha$   | -3595.4931 | -3595.4469 | -3595.4595 |
|         | $\alpha\beta\alpha\beta\alpha$   | -3595.4752 | -3595.4407 | -3595.4588 |
|         | $\alpha\beta\beta\alpha\alpha$   | -3595.4669 | -3595.4384 | -3595.4567 |
|         | $\beta\alpha\alpha\beta\alpha$   | -3595.4759 | -3595.4417 | -3595.4597 |
|         | $\beta\alpha\beta\alpha\alpha$   | -3595.4664 | -3595.4387 | -3595.4558 |
|         | $\beta\beta\alpha\alpha\alpha$   | -3595.4653 | -3595.4350 | -3595.4551 |
| sextet  | $\alpha\alpha\alpha\beta\beta$   | -3595.4691 | -3595.4422 | -3595.4584 |
|         | $\alpha\alpha\beta\alpha\beta$   | -3595.4765 | -3595.4426 | -3595.4604 |
|         | $\alpha\beta\alpha\alpha\beta$   | -3595.4931 | -3595.4503 | -3595.4597 |
|         | $\beta\alpha\alpha\alpha\beta$   | -3595.4928 | -3595.4474 | -3595.4621 |
| octet   | $\alpha\alpha\alpha\beta\alpha$  | -3595.4783 | -3595.4440 | -3595.4616 |
|         | $\alpha\alpha\beta\alpha\alpha$  | -3595.4681 | -3595.4395 | -3595.4578 |
|         | $\alpha\beta\alpha\alpha\alpha$  | -3595.4663 | -3595.4357 | -3595.4558 |
|         | $\beta\alpha\alpha\alpha\alpha$  | -3595.4672 | -3595.4369 | -3595.4568 |
| 12-et   | $\alpha\alpha\alpha\alpha\beta$  | -3595.4676 | -3595.4365 | -3595.4578 |
| 14-et   | $\alpha\alpha\alpha\alpha\alpha$ | -3595.4689 | -3595.4385 | -3595.4581 |

| Spin state | Spin<br>topology<br>(Mn1~Mn4-O8) | Relative Gibbs Free energy (kcal/mol) |                            |                        |                        |
|------------|----------------------------------|---------------------------------------|----------------------------|------------------------|------------------------|
|            |                                  | $\Delta G^\ddagger(\text{Rea-TS})$    | $\Delta G(\text{Rea-Pro})$ | $\Delta G(\text{Rea})$ | $\Delta G(\text{Pro})$ |
| doublet    | $\alpha\alpha\beta\beta\alpha$   | 29.0                                  | 21.1                       | 0.0                    | 1.6                    |
|            | $\alpha\beta\alpha\beta\alpha$   | 21.6                                  | 10.3                       | 11.2                   | 2.1                    |
|            | $\alpha\beta\beta\alpha\alpha$   | 17.9                                  | 6.4                        | 16.4                   | 3.4                    |
|            | $\beta\alpha\alpha\beta\alpha$   | 21.5                                  | 10.2                       | 10.8                   | 1.5                    |
|            | $\beta\alpha\beta\alpha\alpha$   | 17.4                                  | 6.7                        | 16.8                   | 4.0                    |
|            | $\beta\beta\alpha\alpha\alpha$   | 19.0                                  | 6.4                        | 17.4                   | 4.4                    |
| sextet     | $\alpha\alpha\alpha\beta\beta$   | 16.9                                  | 6.7                        | 15.1                   | 2.3                    |
|            | $\alpha\alpha\beta\alpha\beta$   | 21.3                                  | 10.1                       | 10.4                   | 1.1                    |
|            | $\alpha\beta\alpha\alpha\beta$   | 26.9                                  | 21.0                       | 0.0                    | 1.5                    |
|            | $\beta\alpha\alpha\alpha\beta$   | 28.5                                  | 19.3                       | 0.2                    | 0.0                    |
| octet      | $\alpha\alpha\alpha\beta\alpha$  | 21.5                                  | 10.5                       | 9.3                    | 0.3                    |
|            | $\alpha\alpha\beta\alpha\alpha$  | 17.9                                  | 6.5                        | 15.7                   | 2.7                    |
|            | $\alpha\beta\alpha\alpha\alpha$  | 19.2                                  | 6.6                        | 16.8                   | 4.0                    |
|            | $\beta\alpha\alpha\alpha\alpha$  | 19.0                                  | 6.5                        | 16.3                   | 3.3                    |
| 12-et      | $\alpha\alpha\alpha\alpha\beta$  | 19.5                                  | 6.1                        | 16.0                   | 2.7                    |
| 14-et      | $\alpha\alpha\alpha\alpha\alpha$ | 19.1                                  | 6.8                        | 15.2                   | 2.5                    |

**Rea:**

|    |             |             |             |   |             |             |             |
|----|-------------|-------------|-------------|---|-------------|-------------|-------------|
| Ca | -2.51689900 | -0.10138400 | 0.89848300  | O | -0.83620000 | 1.85179800  | 1.39215300  |
| Mn | 0.76408600  | 0.98678600  | 1.33055400  | O | -1.42780100 | 1.20419800  | -1.00933600 |
| Mn | -0.65338900 | 2.62743200  | -0.26604900 | O | 0.96702200  | 1.64492200  | -0.37199800 |
| Mn | 0.03675500  | 0.15595200  | -1.29486800 | O | -0.95218300 | -1.05930800 | -2.10062000 |
| Mn | -1.31313300 | -2.73051300 | -1.49746300 | O | 0.04436200  | -0.42544400 | 0.46271100  |



|   |             |             |             |   |             |             |             |
|---|-------------|-------------|-------------|---|-------------|-------------|-------------|
| O | -3.11176700 | 1.41696600  | 2.96871400  | N | 2.71926500  | 0.28366600  | 1.24380000  |
| H | -3.70906000 | 1.97143800  | 2.42902700  | C | 3.30743600  | -0.78108300 | 1.88806800  |
| H | -2.23675900 | 1.83756300  | 2.82031000  | H | 2.75958700  | -1.36199700 | 2.61655100  |
| O | -4.16729400 | -1.74254900 | 1.79560200  | C | 4.60389300  | -0.92139800 | 1.44886900  |
| H | -3.94572900 | -2.11868600 | 2.67780300  | N | 4.78710500  | 0.10886300  | 0.53368600  |
| O | -1.73823100 | -4.46345200 | -1.07018800 | H | 5.58016100  | 0.17467300  | -0.10978900 |
| H | -3.28828900 | -4.40843500 | -0.23211100 | C | 3.62707900  | 0.79338900  | 0.42451200  |
| O | -1.01967600 | -3.19907600 | -3.57833500 | H | 3.45200600  | 1.61021100  | -0.26074300 |
| H | -1.97715900 | -3.21581300 | -3.79298000 | C | 5.65877900  | -1.93260300 | 1.81841000  |
| H | -0.75660600 | -2.26690700 | -3.75709600 | H | 6.05045000  | -1.72286400 | 2.82507900  |
| O | -2.85965500 | -2.68955700 | 4.04254300  | H | 5.17219400  | -2.91563900 | 1.88948400  |
| H | -3.14694200 | -2.60392900 | 4.96598100  | C | 6.87534200  | -2.02432300 | 0.86044400  |
| H | -2.27603100 | -1.90024000 | 3.84080400  | H | 7.53473200  | -1.16041300 | 0.99834800  |
| O | -1.56564600 | -4.29330800 | 2.10172400  | H | 7.45421400  | -2.92110900 | 1.12076600  |
| H | -2.39944600 | -4.59996800 | 1.67585100  | C | 6.48820600  | -2.03078800 | -0.61835300 |
| H | -1.88611900 | -3.85656300 | 2.92158600  | O | 6.59357100  | -1.00825000 | -1.30926700 |
| O | -3.91188800 | -4.37554400 | 0.54480700  | N | 5.96299100  | -3.18220500 | -1.10769900 |
| H | -4.19258700 | -2.52740000 | 1.20426500  | H | 5.86186700  | -3.97264600 | -0.48286100 |
| H | -4.54798100 | -5.09648800 | 0.40558400  | C | 5.32260400  | -3.24591700 | -2.42683400 |
| O | -1.69334500 | -2.45593800 | 0.20786800  | H | 6.00894300  | -2.79684600 | -3.15334500 |
| H | -1.36234000 | -3.12857800 | 0.89424600  | H | 5.21231400  | -4.30801700 | -2.67841400 |
| O | -3.88198300 | -0.81181200 | -0.98009900 | C | 3.96647800  | -2.52111200 | -2.48702600 |
| C | -3.98010100 | -1.60464400 | -1.92280000 | H | 4.12190100  | -1.45210000 | -2.30971200 |
| O | -3.12703000 | -2.54542600 | -2.21811100 | H | 3.57949100  | -2.61945700 | -3.51185100 |
| C | -5.21930300 | -1.55086300 | -2.81867200 | C | 2.94110800  | -3.06858000 | -1.48733600 |
| H | -6.05260700 | -1.93817700 | -2.21239800 | H | 3.33975700  | -2.98822100 | -0.46407200 |
| H | -5.43766000 | -0.48698600 | -2.97714500 | H | 2.72109400  | -4.12756400 | -1.66813500 |
| C | -5.13127000 | -2.30402900 | -4.14701100 | C | 1.61431900  | -2.31106300 | -1.47071900 |
| H | -4.94662000 | -3.37318500 | -3.98830700 | O | 1.65271000  | -1.05706700 | -1.62060900 |
| H | -6.06764600 | -2.20052400 | -4.71042100 | O | 0.59474200  | -3.05993800 | -1.27175300 |
| H | -4.32142000 | -1.90943500 | -4.77536800 | O | 0.41475500  | 4.10184700  | 0.62094300  |
| O | 0.70516500  | 0.24160700  | 3.12585800  | C | 1.24153600  | 3.87432200  | 1.55939500  |
| C | -0.21796700 | -0.48542100 | 3.64851400  | O | 1.58624300  | 2.73211400  | 2.01109600  |
| O | -1.29351200 | -0.79775600 | 3.08299100  | C | 1.89459400  | 5.07748600  | 2.23343900  |
| C | 0.04244500  | -0.91910200 | 5.08507200  | H | 2.97368900  | 4.87478200  | 2.28115100  |
| H | -0.52200400 | -1.83937800 | 5.28568100  | H | 1.54892600  | 5.07109100  | 3.27843100  |
| H | 1.11131700  | -1.13632700 | 5.20734000  | C | 1.60607600  | 6.42493000  | 1.57165600  |
| C | -0.37335100 | 0.18791500  | 6.07755900  | H | 2.10020000  | 7.23388500  | 2.12509400  |
| H | -1.43346500 | 0.43369100  | 5.91784900  | H | 1.96894100  | 6.44457000  | 0.53698500  |
| H | 0.19747900  | 1.09791600  | 5.84634300  | H | 0.52992500  | 6.62893100  | 1.54515600  |
| C | -0.14324700 | -0.21800700 | 7.53665300  | O | -2.23125600 | 3.66974900  | -0.24101000 |
| H | -0.72047400 | -1.11586600 | 7.79897900  | C | -3.44429800 | 3.25798800  | -0.00928200 |
| H | 0.91661200  | -0.43790500 | 7.72572000  | O | -3.75720700 | 2.14297300  | 0.44632400  |
| H | -0.44567900 | 0.58476400  | 8.22134100  | C | -4.50995200 | 4.28295700  | -0.35629000 |

|   |             |            |             |   |            |            |             |
|---|-------------|------------|-------------|---|------------|------------|-------------|
| H | -4.20678400 | 5.28286600 | -0.02688600 | H | 1.07254300 | 2.42311200 | -4.98866100 |
| H | -4.62115800 | 4.31611500 | -1.44860300 | C | 1.13583600 | 4.50698500 | -4.31973900 |
| H | -5.46780000 | 4.00199000 | 0.09027100  | H | 0.52012300 | 5.16189800 | -3.69091000 |
| O | -0.18685000 | 3.26103900 | -2.10725200 | H | 2.10840700 | 4.41621000 | -3.81283100 |
| C | 0.21717700  | 2.48441500 | -3.03365700 | C | 1.33230700 | 5.12996200 | -5.70582500 |
| O | 0.40824700  | 1.22644600 | -2.95124200 | H | 1.96622600 | 4.49870000 | -6.34438500 |
| C | 0.47474000  | 3.12294900 | -4.39205900 | H | 1.81001400 | 6.11556600 | -5.63209000 |
| H | -0.50633500 | 3.20844900 | -4.88765700 | H | 0.37091700 | 5.26320600 | -6.22178500 |

**TS:**

|    |             |             |             |   |             |             |             |
|----|-------------|-------------|-------------|---|-------------|-------------|-------------|
| Ca | -2.55039900 | -0.08474100 | 0.89963600  | H | -5.99534800 | -2.40205300 | -1.84984000 |
| Mn | 0.75875700  | 1.08819500  | 1.30766500  | H | -5.71871200 | -0.89482500 | -2.70877500 |
| Mn | -0.65063700 | 2.61713300  | -0.40579600 | C | -5.27078000 | -2.68727800 | -3.87650900 |
| Mn | 0.06706800  | 0.09788000  | -1.27130200 | H | -4.91568800 | -3.71199000 | -3.71647000 |
| Mn | -1.28260600 | -2.77722800 | -1.41753000 | H | -6.27013600 | -2.74032500 | -4.32720700 |
| O  | -0.84716500 | 1.94530300  | 1.28983300  | H | -4.60454500 | -2.20415500 | -4.60423100 |
| O  | -1.40299500 | 1.13970300  | -1.07135100 | O | 0.67898700  | 0.46073200  | 3.13563500  |
| O  | 0.97798400  | 1.63086700  | -0.43932400 | C | -0.25791100 | -0.23299700 | 3.68637300  |
| O  | -0.90777100 | -1.16490700 | -2.05669700 | O | -1.32294800 | -0.57402600 | 3.12393500  |
| O  | 0.06373700  | -0.37925200 | 0.50836100  | C | -0.02361600 | -0.58381100 | 5.14945500  |
| O  | -3.17803700 | 1.57871500  | 2.83266000  | H | -0.50888200 | -1.54680000 | 5.35800500  |
| H  | -3.75636300 | 2.10562700  | 2.24701000  | H | 1.05308600  | -0.69026200 | 5.33062800  |
| H  | -2.29711100 | 1.98754900  | 2.68943600  | C | -0.59994600 | 0.50965800  | 6.07460500  |
| O  | -4.06064200 | -1.81637700 | 1.73075900  | H | -1.66855100 | 0.64135500  | 5.85131500  |
| H  | -4.01629400 | -2.01427500 | 2.68842500  | H | -0.11085100 | 1.46498700  | 5.83714700  |
| O  | -1.78865900 | -4.54775500 | -0.92480600 | C | -0.40856700 | 0.18102200  | 7.55855400  |
| H  | -2.68551200 | -4.44439800 | -0.46460300 | H | -0.90680600 | -0.76102400 | 7.82797300  |
| O  | -1.02679200 | -3.34729600 | -3.48657700 | H | 0.65620200  | 0.07640600  | 7.80876100  |
| H  | -1.98531100 | -3.40668100 | -3.68453600 | H | -0.82560700 | 0.97250400  | 8.19439400  |
| H  | -0.78223300 | -2.43230000 | -3.74799000 | N | 2.71100800  | 0.37706100  | 1.28258100  |
| O  | -2.79635800 | -2.53458100 | 4.18838000  | C | 3.27634100  | -0.66613100 | 1.98042700  |
| H  | -2.95164700 | -2.47733800 | 5.14478500  | H | 2.71380500  | -1.20315400 | 2.73102900  |
| H  | -2.30160300 | -1.70995100 | 3.92913900  | C | 4.57283800  | -0.84867900 | 1.55750100  |
| O  | -1.50333800 | -4.07762700 | 2.19857500  | N | 4.77979000  | 0.13382900  | 0.59620500  |
| H  | -2.38073800 | -4.33632900 | 1.79657300  | H | 5.57856300  | 0.15480400  | -0.04379200 |
| H  | -1.77721300 | -3.61695500 | 3.02409500  | C | 3.63281900  | 0.83202800  | 0.44647800  |
| O  | -3.76928500 | -4.06167400 | 0.80268300  | H | 3.47718300  | 1.61798600  | -0.27837100 |
| H  | -3.96552000 | -2.98377800 | 1.17713400  | C | 5.60804000  | -1.85845700 | 1.98286800  |
| H  | -4.57268700 | -4.57968800 | 0.97877900  | H | 5.98486400  | -1.61488600 | 2.98752300  |
| O  | -1.55293500 | -2.35424000 | 0.26960000  | H | 5.10832500  | -2.83239900 | 2.08254600  |
| H  | -1.31981000 | -3.02939200 | 1.01573300  | C | 6.83963200  | -2.00141900 | 1.05119200  |
| O  | -3.82759200 | -0.80786700 | -1.04319000 | H | 7.50096300  | -1.13459000 | 1.15845800  |
| C  | -3.98774300 | -1.74535500 | -1.82748900 | H | 7.40933600  | -2.88690300 | 1.36486900  |
| O  | -3.10876300 | -2.68013900 | -2.08289700 | C | 6.47711500  | -2.07921000 | -0.43164500 |
| C  | -5.31814600 | -1.90505500 | -2.56187000 | O | 6.58672000  | -1.08912800 | -1.16799300 |

|   |            |             |             |   |             |            |             |
|---|------------|-------------|-------------|---|-------------|------------|-------------|
| N | 5.96876200 | -3.25612900 | -0.87579800 | H | 2.01008300  | 6.46417300 | 0.15844500  |
| H | 5.86738400 | -4.01974600 | -0.21853000 | H | 0.53385000  | 6.73096600 | 1.09226900  |
| C | 5.35675500 | -3.38739400 | -2.20323500 | O | -2.23069300 | 3.64405500 | -0.47216600 |
| H | 6.05496500 | -2.96830700 | -2.93635800 | C | -3.44867100 | 3.23474600 | -0.25129300 |
| H | 5.25811500 | -4.46091900 | -2.40623500 | O | -3.76445300 | 2.14720100 | 0.26154900  |
| C | 3.99807400 | -2.67545500 | -2.32530500 | C | -4.50959500 | 4.22776600 | -0.69153600 |
| H | 4.14342800 | -1.59883500 | -2.19037600 | H | -4.22241000 | 5.24863000 | -0.41667200 |
| H | 3.63444600 | -2.82109400 | -3.35304800 | H | -4.58935600 | 4.19165600 | -1.78650300 |
| C | 2.95366000 | -3.18601000 | -1.32534800 | H | -5.47804800 | 3.96713400 | -0.25573200 |
| H | 3.33273900 | -3.06519500 | -0.29863100 | O | -0.16319200 | 3.13765100 | -2.28121600 |
| H | 2.73689900 | -4.25095200 | -1.47054500 | C | 0.26318400  | 2.30954200 | -3.14983200 |
| C | 1.62947400 | -2.42579600 | -1.36482000 | O | 0.46199600  | 1.05986000 | -2.98435100 |
| O | 1.67483900 | -1.17351800 | -1.51696700 | C | 0.54093800  | 2.86142400 | -4.54148700 |
| O | 0.60000300 | -3.17438600 | -1.20715100 | H | -0.43123800 | 2.90364100 | -5.05969100 |
| O | 0.40245800 | 4.14576700  | 0.38960700  | H | 1.15689800  | 2.13106500 | -5.08022800 |
| C | 1.22248900 | 3.98416700  | 1.34786100  | C | 1.18694400  | 4.25448400 | -4.54657000 |
| O | 1.56884300 | 2.87473200  | 1.87368100  | H | 0.55296600  | 4.94179600 | -3.97289400 |
| C | 1.85999600 | 5.23187300  | 1.95074500  | H | 2.15052900  | 4.20720500 | -4.01713500 |
| H | 2.93441200 | 5.02780700  | 2.05662500  | C | 1.40341200  | 4.78864900 | -5.96631900 |
| H | 1.47308800 | 5.30834000  | 2.97854700  | H | 2.05541100  | 4.12449800 | -6.55099000 |
| C | 1.60662900 | 6.52545200  | 1.17642300  | H | 1.87000200  | 5.78207800 | -5.94771700 |
| H | 2.08476300 | 7.37237200  | 1.68512100  | H | 0.45067100  | 4.87783400 | -6.50714100 |

**Pro:**

|    |             |             |             |   |             |             |             |
|----|-------------|-------------|-------------|---|-------------|-------------|-------------|
| Ca | -2.50261300 | 0.17029000  | 0.59763900  | H | -3.80549200 | -2.27646900 | 4.32243700  |
| Mn | 0.76796700  | 1.04444700  | 1.35500400  | H | -2.60892100 | -1.52728600 | 3.60821800  |
| Mn | -0.34778700 | 2.73951900  | -0.39691000 | O | -1.73500900 | -4.26420400 | 2.01918900  |
| Mn | 0.14361400  | 0.16342400  | -1.28235100 | H | -2.48284500 | -4.71958900 | 1.57260300  |
| Mn | -1.44019900 | -2.68981800 | -1.50644900 | H | -2.14407900 | -3.82241700 | 2.79276000  |
| O  | -0.72518700 | 2.05338000  | 1.25225900  | O | -3.98643400 | -4.59706900 | 0.38373700  |
| O  | -1.21403500 | 1.37835600  | -1.15320700 | H | -4.12915800 | -3.61656100 | 0.49009300  |
| O  | 1.16760000  | 1.59672600  | -0.34683200 | H | -4.86081900 | -4.99489600 | 0.24636500  |
| O  | -0.96282500 | -0.98830000 | -2.00479800 | O | -1.91524200 | -2.26715200 | 0.22575900  |
| O  | -0.01262500 | -0.33704200 | 0.49887200  | H | -1.66463200 | -3.01797100 | 0.85169700  |
| O  | -4.15317200 | 1.02101400  | 2.37907900  | O | -3.83479700 | -0.43244800 | -1.34132300 |
| H  | -4.23686800 | 1.87468900  | 1.89964000  | C | -3.96871400 | -1.36445300 | -2.13923000 |
| H  | -3.47576600 | 1.16840000  | 3.06435800  | O | -3.20548100 | -2.42261400 | -2.23524800 |
| O  | -3.96647300 | -1.95950400 | 1.08603800  | C | -5.15931000 | -1.36686800 | -3.10166700 |
| H  | -3.67301600 | -2.23370600 | 1.99850000  | H | -6.01643000 | -1.76111700 | -2.53314600 |
| O  | -1.77610000 | -4.44346200 | -1.35409200 | H | -5.39232800 | -0.31612200 | -3.31217100 |
| H  | -2.64837200 | -4.58912100 | -0.91535500 | C | -4.97363600 | -2.16806100 | -4.39256000 |
| O  | -0.96616100 | -2.98236600 | -3.59889900 | H | -4.78389400 | -3.22642900 | -4.17936100 |
| H  | -1.86981700 | -3.18505600 | -3.91140200 | H | -5.87152400 | -2.10112500 | -5.02031600 |
| H  | -0.85635800 | -2.01042400 | -3.71674800 | H | -4.13007200 | -1.78202600 | -4.98132300 |
| O  | -3.07300600 | -2.40921600 | 3.69821500  | O | 0.44417100  | 0.40248300  | 3.18837400  |

|   |             |             |             |   |             |             |             |
|---|-------------|-------------|-------------|---|-------------|-------------|-------------|
| C | -0.63144300 | -0.05433600 | 3.69746600  | C | 2.77086000  | -3.28023500 | -1.24990900 |
| O | -1.73592100 | -0.17999200 | 3.08798400  | H | 3.07535700  | -3.28636400 | -0.19159600 |
| C | -0.55643300 | -0.46568600 | 5.16410800  | H | 2.48237000  | -4.30724400 | -1.50509000 |
| H | -0.81900600 | -1.53311100 | 5.22651800  | C | 1.50823200  | -2.42139600 | -1.30363300 |
| H | 0.47467400  | -0.34720700 | 5.51497600  | O | 1.64805900  | -1.17929600 | -1.49537800 |
| C | -1.52310100 | 0.34399600  | 6.04945100  | O | 0.43191100  | -3.08077800 | -1.10721500 |
| H | -2.54838200 | 0.21243500  | 5.67455600  | O | 0.80578200  | 4.14062600  | 0.50923300  |
| H | -1.29035000 | 1.41481400  | 5.95196600  | C | 1.53216400  | 3.87373600  | 1.51744600  |
| C | -1.45096800 | -0.06731500 | 7.52338600  | O | 1.72315800  | 2.72393000  | 2.03606500  |
| H | -1.70253900 | -1.12920400 | 7.65383600  | C | 2.24996500  | 5.03556000  | 2.19853100  |
| H | -0.44188600 | 0.08678600  | 7.92902700  | H | 3.28499200  | 4.71542300  | 2.38156100  |
| H | -2.14928100 | 0.52043100  | 8.13302000  | H | 1.79345000  | 5.13711700  | 3.19522500  |
| N | 2.63155800  | 0.12477100  | 1.49081200  | C | 2.19794500  | 6.36161000  | 1.43957000  |
| C | 3.01392900  | -1.01559200 | 2.16033400  | H | 2.72235100  | 7.14404400  | 2.00329700  |
| H | 2.32110200  | -1.54491300 | 2.79972100  | H | 2.67079200  | 6.27318800  | 0.45392700  |
| C | 4.32755300  | -1.30059000 | 1.86516500  | H | 1.16307600  | 6.68301100  | 1.27840900  |
| N | 4.73334000  | -0.28186800 | 1.01073000  | O | -1.82463700 | 3.93119600  | -0.45841400 |
| H | 5.59619200  | -0.30092800 | 0.46042500  | C | -3.04128000 | 3.67106600  | -0.09469800 |
| C | 3.68054400  | 0.53788600  | 0.79544500  | O | -3.45223500 | 2.57669200  | 0.34099000  |
| H | 3.68292000  | 1.38255700  | 0.12161100  | C | -3.98831700 | 4.84878800  | -0.25091600 |
| C | 5.20915500  | -2.43706800 | 2.31635700  | H | -3.58379600 | 5.72742000  | 0.26571700  |
| H | 5.50183600  | -2.29673400 | 3.36778100  | H | -4.06956500 | 5.10642100  | -1.31465400 |
| H | 4.60824800  | -3.35723600 | 2.29721100  | H | -4.97867900 | 4.60068800  | 0.14067200  |
| C | 6.51124200  | -2.65141900 | 1.50062400  | O | 0.29624000  | 3.23832200  | -2.23067400 |
| H | 7.24345500  | -1.87252000 | 1.74024800  | C | 0.65640100  | 2.37970900  | -3.10057800 |
| H | 6.95029500  | -3.61412000 | 1.79652600  | O | 0.70789200  | 1.11287800  | -2.95686900 |
| C | 6.29979300  | -2.58583900 | -0.01190400 | C | 1.04859500  | 2.92267200  | -4.46851800 |
| O | 6.59260100  | -1.56689200 | -0.65253800 | H | 0.10815200  | 3.12484500  | -5.00698100 |
| N | 5.71595100  | -3.66323000 | -0.59442500 | H | 1.56692300  | 2.12623500  | -5.01609900 |
| H | 5.45281400  | -4.44589200 | -0.00802500 | C | 1.89212100  | 4.20490700  | -4.41149400 |
| C | 5.20627400  | -3.62039200 | -1.97052800 | H | 1.34905500  | 4.96049300  | -3.83039600 |
| H | 5.99681000  | -3.20406400 | -2.60426200 | H | 2.82270200  | 3.99998200  | -3.86088700 |
| H | 5.03441100  | -4.65822600 | -2.28199400 | C | 2.22594400  | 4.74395500  | -5.80639900 |
| C | 3.92659000  | -2.77895600 | -2.12165200 | H | 2.79014800  | 4.00864600  | -6.39725200 |
| H | 4.15125200  | -1.73555000 | -1.87749800 | H | 2.83255500  | 5.65674800  | -5.74293100 |
| H | 3.63248500  | -2.79862100 | -3.18101900 | H | 1.31267800  | 4.98882500  | -6.36698700 |

## Data Summary

**Table S37** The summary table of the upper and lower limits of barriers and driving forces in the form of Gibbs free energy (in kcal mol<sup>-1</sup>) in optimal spin states of O-O bond formation :

| Substrates              | Deprotonation site | Reactive forms | Open-cubane structure |             | Closed-cubane structure |            |
|-------------------------|--------------------|----------------|-----------------------|-------------|-------------------------|------------|
|                         |                    |                | $\Delta G^\ddagger$   | $\Delta G$  | $\Delta G^\ddagger$     | $\Delta G$ |
| <b>O5-W<sub>x</sub></b> | W <sub>x</sub>     | oxo-oxyl       | 5.3~5.9 <sup>a</sup>  | -15.0~-14.9 | 25.7~30.2 <sup>b</sup>  | 11.1~16.4  |

|              |        |                   |                         |             |                         |             |
|--------------|--------|-------------------|-------------------------|-------------|-------------------------|-------------|
|              | W1     |                   | 11.0~16.0 <sup>a'</sup> | -5.9~-3.0   | 6.5~15.2 <sup>b'</sup>  | -2.3~5.0    |
|              | W2     | oxo-hydroxyl      | \                       | \           | \                       | \           |
| <b>W3-W2</b> | W2     | water-oxyl        | 34.0~36.6 <sup>c</sup>  | 8.8~11.1    | \                       | \           |
|              |        |                   | 29.0~30.2 <sup>d</sup>  | -8.6~-7.9   | \                       | \           |
|              | W3     | hydroxyl-hydroxyl | 19.8~21.9 <sup>e</sup>  | -5.3~-2.4   | \                       | \           |
|              | W3, W2 | hydroxyl-oxo      | 7.3~8.4 <sup>f</sup>    | -26.5~-22.9 | \                       | \           |
| <b>W3-Wx</b> |        |                   | \                       | \           | 51.5~52.7 <sup>e'</sup> | 51.3~52.8   |
|              | Wx     | water-oxo/oxyl    | \                       | \           | 47.1~47.9 <sup>d'</sup> | 45.9~48.9   |
|              |        |                   | \                       | \           | 38.6~41.8 <sup>e'</sup> | 37.8~40.8   |
|              | W3     | hydroxyl-hydroxyl | 16.7~18.8 <sup>g</sup>  | -9.4~-3.8   | 3.6~3.9 <sup>f'</sup>   | -15.2~-14.6 |
|              | W3, Wx | hydroxyl-oxo      | \                       | \           | 0.4~1.1 <sup>g'</sup>   | -27.0~-18.2 |
| <b>W1-W2</b> | W1     | hydroxyl-hydroxyl | 28.4~29.2 <sup>h</sup>  | 2.8~4.6     | 23.5~23.8 <sup>h'</sup> | -6.7~-6.5   |
|              | W2     | water-oxo         | \                       | \           | \                       | \           |
|              | W1, W2 | hydroxyl-oxyl     | 18.6~18.7 <sup>i</sup>  | -7.4~-6.7   | 21.6~23.2 <sup>i'</sup> | 7.6~16.2    |
| <b>O2-O4</b> | W1     |                   | 20.3~38.8 <sup>i</sup>  | -3.6~5.8    | 25.3 <sup>i'</sup>      | 5.7         |
|              | W2     | oxo-oxo/oxyl      | 33.6~36.6 <sup>k</sup>  | 10.6~14.5   | 51.3~66.6 <sup>k'</sup> | 53.4~61.9   |
|              | Wx     |                   | 38.6~56.1 <sup>l</sup>  | 20.0~30.1   | 46.2~52.2 <sup>l'</sup> | 27.4~36.6   |
| <b>W1-O4</b> | W1     | hydroxyl-oxo      | 14.1~18.4 <sup>m</sup>  | -2.9~0.1    | 15.5~21.6 <sup>m'</sup> | 5.4~21.3    |
|              | W2     |                   | \                       | \           | \                       | \           |
|              | Wx     | water-oxo         | \                       | \           | \                       | \           |
| <b>W2-O5</b> | W1     | hydroxyl-oxo      | 19.6~25.6 <sup>n</sup>  | 4.5~8.6     | \                       | \           |
|              | Wx     |                   | 49.9~54.3 <sup>o</sup>  | -10.2~-2.3  | \                       | \           |
|              | W2     | oxyl-oxo          | 19.4~24.9 <sup>p</sup>  | -1.6~4.0    | \                       | \           |
| <b>W2-Wx</b> | W1     | hydroxyl-hydroxyl | \                       | \           | \                       | \           |
|              | W2     |                   | \                       | \           | 34.3~36.5 <sup>n'</sup> | 25.7~27.6   |
|              | Wx     | hydroxyl-oxyl     | \                       | \           | 43.5~45.2 <sup>o'</sup> | 41.6~43.9   |
| <b>W3-O5</b> | W1     |                   | \                       | \           | 17.9~21.9 <sup>p'</sup> | -22.3~-14.1 |
|              | W2     | water-oxo         | \                       | \           | \                       | \           |
|              | Wx     |                   | \                       | \           | \                       | \           |
|              | W3     | hydroxyl-oxo      | 9.2~10.2 <sup>q</sup>   | -4.6~-2.8   | 7.2~9.0 <sup>q'</sup>   | -10.0~-6.5  |

'\` denotes the infeasibility of reactions that have been testified for deliberation and trials (see detailed interpretations in related sections). Here are specific meanings for each letter: (a) open-cubane Wx (oxyl)-O5 (oxo) coupling; (b) open-cubane Wx (hydroxyl)-O5 (oxo) nucleophilic attack; (c) open-cubane W3 (water)-W2 (oxyl) nucleophilic attack with Ca-bound O of Asp170 as the proton acceptor; (d) open-cubane crystal or solvent water-W2 (oxyl) nucleophilic attack with O5 as the proton acceptor; (e) open-cubane W3 (hydroxyl)-W2 (hydroxyl) coupling; (f) open-cubane W3 (hydroxyl)-W2 (oxo) nucleophilic attack; (g) open-cubane W3 (hydroxyl)-Wx (hydroxyl) coupling; (h) open-cubane W1 (hydroxyl)-W2 (hydroxyl) coupling; (i) open-cubane

W1(hydroxyl)-W2 (oxyl) nucleophilic attack; (j) open-cubane O2 (oxo)-O4 (oxo/oxyl) coupling with deprotonated W1; (k) open-cubane O2 (oxo)-O4 (oxo/oxyl) coupling with deprotonated W2; (l) open-cubane O2 (oxo)-O4 (oxo/oxyl) coupling with deprotonated Wx; (m) open-cubane W1 (hydroxyl)-O4 (oxo) nucleophilic attack; (n) open-cubane W2 (hydroxyl)-O5 (oxo) nucleophilic attack with deprotonated W1; (o) open-cubane W2 (hydroxyl)-O5 (oxo) nucleophilic attack with deprotonated Wx; (p) open-cubane W2 (oxyl)-O5 (oxo) nucleophilic attack with deprotonated W2; (q) open-cubane W3 (hydroxyl)-O5 (oxo) nucleophilic attack; (a') closed-cubane Wx (oxyl)-O5(oxo) coupling; (b') closed-cubane Wx (hydroxyl)-O5 (oxo) nucleophilic attack; (c') closed-cubane W3 (water)-Wx (oxo/oxyl) nucleophilic attack with Ca-bound O of Asp170 as the proton acceptor; (d') closed-cubane W3 (water)-Wx (oxo/oxyl) nucleophilic attack with Mn4-bound O of Asp170 as the proton acceptor; (e') closed-cubane crystal or solvent water-Wx (oxo/oxyl) nucleophilic attack with W2 as the proton acceptor; (f') closed-cubane W3 (hydroxyl)-Wx (hydroxyl) coupling; (g') closed-cubane W3 (hydroxyl)-Wx (oxo) nucleophilic attack; (h') closed-cubane W1 (hydroxyl)-W2 (hydroxyl) coupling; (i') closed-cubane W1(hydroxyl)-W2 (oxyl) nucleophilic attack; (j') closed-cubane O2 (oxo)-O4 (oxo/oxyl) coupling with deprotonated W1; (k') closed-cubane O2 (oxo)-O4 (oxo/oxyl) coupling with deprotonated W2; (l') closed-cubane O2 (oxo)-O4 (oxo/oxyl) coupling with deprotonated Wx; (m') closed-cubane W1 (hydroxyl)-O4 (oxo) nucleophilic attack; (n') closed-cubane Wx (hydroxyl)-W2 (oxo) nucleophilic attack; (o') closed-cubane W2 (hydroxyl)-Wx (oxo) nucleophilic attack; (p') closed-cubane W3 (water)-O5 (oxo) nucleophilic attack with COO- of Glu189 as the proton acceptor. (q') closed-cubane W3 (hydroxyl)-O5 (oxo) nucleophilic attack. All the videos with corresponding letters are uploaded as 'video\_open/closed-cubane.zip'.

**Table S38** Comparisons of upper and lower limits of barriers and driving forces (in kcal mol<sup>-1</sup>)\* in different energy representations in stable spin states for all the mechanisms of O-O bond formation in the open-cubane structures:

| Open-cubane | Free energies in solution phases with thermal corrections |                             |                                     |                             | Electronic energies in solution phases without thermal corrections |                             | Electronic energies in gas phases without thermal corrections |                             |
|-------------|-----------------------------------------------------------|-----------------------------|-------------------------------------|-----------------------------|--------------------------------------------------------------------|-----------------------------|---------------------------------------------------------------|-----------------------------|
|             | <sup>[a]</sup> Method 1                                   |                             | <sup>[b]</sup> Method 2             |                             | <sup>[a]</sup> Method 1                                            |                             | $\Delta E^\ddagger(\text{Re a-TS})$                           | $\Delta E(\text{Rea -Pro})$ |
| Mechanisms  | $\Delta G^\ddagger(\text{Re a-TS})$                       | $\Delta G(\text{Rea -Pro})$ | $\Delta G^\ddagger(\text{Re a-TS})$ | $\Delta G(\text{Rea -Pro})$ | $\Delta E^\ddagger(\text{Re a-TS})$                                | $\Delta E(\text{Rea -Pro})$ |                                                               |                             |
|             |                                                           |                             |                                     |                             |                                                                    |                             |                                                               |                             |

|                          |               |                  |               |                  |               |                 |               |                 |
|--------------------------|---------------|------------------|---------------|------------------|---------------|-----------------|---------------|-----------------|
| a                        | 5.3~<br>5.9   | -15.0~ -<br>14.9 | 5.3~<br>5.8   | -15.0~ -<br>14.9 | 6.3~<br>6.9   | -13.0~<br>-12.9 | 7.7~<br>7.8   | -8.1~<br>-8.0   |
| b                        | 25.7~<br>30.2 | 11.1~<br>16.4    | 25.7~<br>30.4 | 11.1~<br>16.5    | 27.1~<br>33.7 | 14.5~<br>18.5   | 25.1~<br>32.7 | 14.8~<br>23.5   |
| c                        | 34.0~<br>36.6 | 8.8~<br>11.1     | 34.1~<br>36.5 | 8.7~<br>11.1     | 34.7~<br>37.0 | 9.6~<br>12.5    | 35.3~<br>38.2 | 15.8~<br>17.6   |
| d                        | 29.0~<br>30.2 | -8.6~<br>-7.9    | 29.0~<br>30.3 | -8.5~<br>-7.7    | 30.3~<br>32.1 | -7.8~<br>-5.9   | 31.6~<br>34.2 | -5.5~<br>2.7    |
| e                        | 19.8~<br>21.9 | -5.3~<br>-2.4    | 19.7~<br>21.9 | -5.3~<br>-2.5    | 21.9~<br>23.5 | -3.2~<br>-0.1   | 22.3~<br>24.4 | -2.8~<br>3.9    |
| f                        | 7.3<br>~8.4   | -26.5~<br>-22.9  | 7.5<br>~8.4   | -26.5~<br>-23.0  | 8.8<br>~10.1  | -23.3~<br>-19.8 | 9.1<br>~12.7  | -20.5~<br>-17.6 |
| g                        | 16.7~<br>18.8 | -9.4~<br>-3.8    | 16.7~<br>18.9 | -9.4~<br>-3.6    | 18.2~<br>20.4 | -7.3~<br>-1.5   | 19.2~<br>22.9 | -8.3~<br>-5.5   |
| h                        | 28.4~<br>29.2 | 2.8~<br>4.6      | 28.4~<br>29.3 | 2.8~<br>4.7      | 30.1~<br>33.7 | 3.2~<br>7.3     | 32.5~<br>38.2 | 3.9~<br>9.6     |
| i                        | 18.6~<br>18.7 | -7.4~<br>-6.7    | 18.5~<br>18.7 | -7.2~<br>-6.7    | 20.6~<br>22.8 | -5.1~<br>-3.7   | 21.9~<br>26.0 | -7.1~<br>-1.1   |
| j                        | 20.3~<br>38.8 | -3.6~<br>5.8     | 20.3~<br>39.0 | -3.6~<br>5.9     | 22.8~<br>40.5 | -1.2~<br>7.7    | 22.8~<br>44.2 | -4.6~<br>12.6   |
| k                        | 33.6~<br>36.6 | 10.6~<br>14.5    | 33.6~<br>36.7 | 10.6~<br>14.7    | 36.8~<br>39.2 | 13.7~<br>17.0   | 35.8~<br>40.6 | 15.4~<br>21.6   |
| l                        | 38.6~<br>56.1 | 20.0~<br>30.1    | 38.6~<br>55.9 | 20.1~<br>30.2    | 41.9~<br>59.2 | 23.1~<br>34.0   | 43.3~<br>59.1 | 20.1~<br>38.3   |
| m                        | 14.1~<br>18.4 | -2.9~<br>0.1     | 14.1~<br>18.3 | -2.9~<br>0.3     | 16.3~<br>21.3 | 0.8~<br>2.9     | 17.3~<br>21.1 | -0.5~<br>4.3    |
| n                        | 19.6~<br>25.6 | 4.5~<br>8.6      | 19.6~<br>25.6 | 4.5~<br>8.5      | 22.1~<br>28.7 | 7.5~<br>10.8    | 19.4~<br>29.2 | 4.0~<br>9.1     |
| o                        | 49.9~<br>54.3 | -10.2~<br>-2.3   | 49.8~<br>54.3 | -10.2~<br>-2.2   | 53.2~<br>58.3 | -7.2~<br>1.2    | 49.8~<br>61.3 | -8.2~<br>5.2    |
| p                        | 19.4~<br>24.9 | -1.6~<br>4.0     | 19.4~<br>24.7 | -1.6~<br>4.1     | 21.6~<br>27.3 | 2.8~<br>6.4     | 22.6~<br>26.3 | -2.5~<br>6.9    |
| q                        | 9.2~<br>10.2  | -4.6~<br>-2.8    | 9.2~<br>10.2  | -4.5~<br>-2.9    | 12.5~<br>14.2 | -1.9~<br>1.5    | 13.5~<br>17.2 | -5.8~<br>3.3    |
| W3<br>deproton-<br>ation | 17.8~<br>21.5 | 11.9~<br>18.8    | 17.8~<br>21.6 | 11.9~<br>19.2    | 21.0~<br>23.8 | 13.9~<br>22.2   | 19.3~<br>24.5 | 15.9~<br>22.6   |

**Table S39** Comparisons of upper and lower limits of barriers and driving forces (in kcal mol<sup>-1</sup>)\* in different energy representations in stable spin states for all the mechanisms of O-O bond formation in the closed-cubane structures:

| Closed-cubane | Free energies in solution phases with thermal corrections | Electronic energies in solution phases | Electronic energies in gas phases |
|---------------|-----------------------------------------------------------|----------------------------------------|-----------------------------------|
|---------------|-----------------------------------------------------------|----------------------------------------|-----------------------------------|

| Mechanisms               |                                     |                            |                                     |                            | without thermal corrections         |                            | without thermal corrections         |                            |
|--------------------------|-------------------------------------|----------------------------|-------------------------------------|----------------------------|-------------------------------------|----------------------------|-------------------------------------|----------------------------|
|                          | [a]Method 1                         |                            | [b]Method 2                         |                            | [a]Method 1                         |                            | $\Delta E^\ddagger(\text{Re a-TS})$ | $\Delta E(\text{Rea-Pro})$ |
|                          | $\Delta G^\ddagger(\text{Re a-TS})$ | $\Delta G(\text{Rea-Pro})$ | $\Delta G^\ddagger(\text{Re a-TS})$ | $\Delta G(\text{Rea-Pro})$ | $\Delta E^\ddagger(\text{Re a-TS})$ | $\Delta E(\text{Rea-Pro})$ |                                     |                            |
| a'                       | 11.0~<br>16.0                       | -5.9~<br>-3.0              | 11.2~<br>16.1                       | -5.8~<br>-3.0              | 12.1~<br>15.8                       | -5.5~<br>-2.9              | 12.5~<br>16.7                       | -4.4~<br>-1.6              |
| b'                       | 6.5~<br>15.2                        | -2.3~<br>5.0               | 6.5~<br>15.2                        | -2.3~<br>5.0               | 8.5~<br>17.3                        | 0.8~<br>8.5                | 7.2~<br>16.1                        | -2.0~<br>4.8               |
| c'                       | 51.5~<br>52.7                       | 51.3~<br>52.8              | 51.5~<br>52.5                       | 51.3~<br>52.6              | 55.5~<br>57.7                       | 56.3~<br>57.8              | 50.5~<br>53.7                       | 51.7~<br>60.8              |
| d'                       | 47.1~<br>47.9                       | 45.9~<br>48.9              | 47.1~<br>47.9                       | 46.0~<br>48.9              | 52.3~<br>54.5                       | 49.9~<br>52.0              | 57.3~<br>58.6                       | 53.4~<br>55.5              |
| e'                       | 38.6~<br>41.8                       | 37.8~<br>40.8              | 38.6~<br>41.8                       | 37.8~<br>40.9              | 40.6~<br>44.4                       | 38.5~<br>43.0              | 39.8~<br>45.2                       | 36.6~<br>45.0              |
| f'                       | 3.6~<br>3.9                         | -15.2~<br>-14.6            | 3.6~<br>3.8                         | -15.2~<br>-14.6            | 5.9~<br>6.1                         | -12.3~<br>-11.6            | 4.0~<br>7.8                         | -9.3~<br>-7.2              |
| g'                       | 0.4~<br>1.1                         | -27.0~<br>-18.2            | 0.6~<br>1.1                         | -27.2~<br>-18.1            | 3.8~<br>5.1                         | -24.8~<br>-15.3            | 3.7~<br>4.5                         | -19.1~<br>-11.9            |
| h'                       | 23.5~<br>23.8                       | -6.7~<br>-6.5              | 23.6~<br>23.8                       | -6.7~<br>-6.5              | 26.5~<br>27.8                       | -3.7~<br>-2.5              | 24.5~<br>29.0                       | -2.6~<br>2.8               |
| i'                       | 21.6~<br>23.2                       | 7.6~<br>16.2               | 21.6~<br>23.4                       | 7.6~<br>16.9               | 25.4~<br>27.2                       | 9.9~<br>18.7               | 22.4~<br>26.2                       | 7.5~<br>16.7               |
| j'                       | 25.3                                | 5.7                        | 25.2                                | 5.6                        | 28.8                                | 9.0                        | 27.5                                | 8.6                        |
| k'                       | 51.3~<br>66.6                       | 53.4~<br>61.9              | 51.3~<br>66.9                       | 53.4~<br>62.0              | 55.3~<br>68.6                       | 59.4~<br>66.9              | 52.9<br>~70.1                       | 63.4~<br>68.5              |
| l'                       | 46.2~<br>52.2                       | 27.4~<br>36.6              | 46.2~<br>52.1                       | 27.4~<br>36.7              | 49.1~<br>58.5                       | 30.7~<br>36.0              | 47.1~<br>56.5                       | 25.7~<br>36.6              |
| m'                       | 15.5~<br>21.6                       | 5.4~<br>21.3               | 15.5~<br>21.7                       | 5.3~<br>21.3               | 18.5~<br>25.6                       | 7.9~<br>27.4               | 18.5~<br>25.6                       | 8.9~<br>30.4               |
| n'                       | 34.3~<br>36.5                       | 25.7~<br>27.6              | 34.3~<br>36.4                       | 25.7~<br>27.5              | 37.1~<br>39.8                       | 29.7~<br>32.6              | 37.1~<br>39.8                       | 33.3~<br>35.2              |
| o'                       | 43.5~<br>45.2                       | 41.6~<br>43.9              | 43.5~<br>45.2                       | 41.5~<br>43.9              | 48.4~<br>48.5                       | 44.6~<br>48.9              | 41.4~<br>46.5                       | 49.6~<br>52.9              |
| p'                       | 17.9~<br>21.9                       | -22.3~<br>-14.1            | 17.9~<br>21.9                       | -22.2~<br>-13.9            | 21.1~<br>25.8                       | -19.3~<br>-10.1            | 24.1~<br>27.8                       | -16.3~<br>-8.5             |
| q'                       | 7.2~<br>9.0                         | -10.0~<br>-6.5             | 7.2~<br>9.0                         | -10.0~<br>-6.6             | 10.2~<br>13.0                       | -8.4~<br>-3.5              | 11.2~<br>16.0                       | -12.0~<br>-1.5             |
| W3<br>deproton-<br>ation | 26.9~<br>29.0                       | 19.3~<br>21.1              | 27.0~<br>29.0                       | 19.5~<br>21.0              | 28.6~<br>31.7                       | 24.3~<br>25.2              | 29.6~<br>35.5                       | 24.0~<br>29.3              |

\*  $\Delta G(E)^\ddagger(\text{Rea-TS}) = G(E)(\text{TS}) - G(E)(\text{Rea})$ ;  $\Delta G(E)(\text{Rea-Pro}) = G(E)(\text{Pro}) - G(E)(\text{Rea})$

Level 1: small basis sets; Level 2: larger basis sets.



**<sup>[a]</sup>Method 1:**

$G(\text{free energy of solute in solvent phase, 298.15K, 1M}) = E(\text{single point energy of solute at level 2 in SMD solvent model for the structure optimized at level 1}) + \Delta G(\text{thermal correction to Gibbs free energy at level 1, 298.15K, 1atm})$

**<sup>[b]</sup>Method 2:**

$G(\text{free energy of solute in solvent phase, 298.15K, 1M}) = G(\text{free energy of solute in gas phase, 298.15K, 1atm}) + \Delta G(\text{solvation free energy in SMD solvent model, 1M}) + 1.89 \text{ kcal/mol (free energy change of gas at 1atm to 1M in solvent due to concentration change, 298.15K)}$

$G(\text{free energy of solute in gas phase, 298.15K, 1atm}) = E(\text{single point energy of solute at level 2 in gas phase for the structure optimized at level 1}) + \Delta G(\text{thermal correction to Gibbs free energy at level 1, 298.15K, 1atm})$

$\Delta G(\text{solvation free energy in SMD solvent model, 1M}) = E(\text{single point energy in SMD solvent model at level 1}) - E(\text{single point energy in gas phase at level 1})$
